# Supplementary material for: Max‐EWMA Chart Using Beta and Unit Nadarajah and Haghighi Distributions
Source: Hindawi journal article supplement (doi:10.1155/2022/9374740), 2022-01-01
Supplement: f1 [file 9374740.f1.pdf]

# SUPPLEMENTARY TEXT: MAX-EWMA CHART USING BETA AND UNIT NADARAJAH AND HAGHIGHI DISTRIBUTIONS

Muhammad Farhan Akram<sup>1</sup>, Sajid Ali<sup>\*,2</sup>, Ismail Shah<sup>3</sup>, and Syed Muhammad Muslim Raza<sup>4</sup>

<sup>1,2,3</sup>*Department of Statistics, Quaid-i-Azam University, Islamabad, 45320, Pakistan*

<sup>4</sup>*Department of Economics and Statistics, Dr Hasan Murad School of Management (HSM), University of Management and Technology, Lahore, Pakistan*

<sup>1</sup>*fanjum566@gmail.com*, <sup>\*,2</sup>*sajidali@qau.edu.pk*, <sup>3</sup>*ishah@qau.edu.pk*, <sup>4</sup>*muslim.raza@umt.edu.pk*

ABSTRACT. The recent industrial revolution is a result of modern technological advancement and industrial improvements require quick detection of assignable causes in a process. This study presents a monitoring scheme for unit interval data assuming beta and unit Nadarajah and Haghghi distributions. To this end, a maximum exponentially weighted moving average (Max-EWMA) chart is introduced to jointly monitor unit interval bounded time and magnitude data. The performance of the proposed chart is evaluated by using average run length and other characteristics of run length distribution using extensive Monte Carlo simulations. Besides a comprehensive simulation study, a real data set is also used to assess the performance of the chart. The results supplement the proposed chart is efficient for joint monitoring time and magnitude, and simultaneous shifts are detected more quickly than separate shifts in the process parameters.

*Keywords:* Average run length; Max-EWMA chart; Beta Distribution; Unit Nadarajah and Haghghi Distribution

TABLE S.1. ARL Results of the Max-EWMA control chart when simultaneous shift occurs in the shape1 parameter of beta distribution and rate parameter of UNH distribution( $\Delta_\gamma \in (1.0, 1.1, 1.2, 1.3, 1.4, 0.9, 0.8, 0.7, 0.6, 0.5)$ ,  $\Delta_\lambda \in (1.0, 1.1, 1.2, 1.3, 1.4, 0.9, 0.8, 0.7, 0.6, 0.5)$  when  $X \sim B(\gamma, \delta)$ ,  $T \sim UNH(\alpha, \lambda)$ ,  $\mu = 0.20$ ,  $\alpha_0 = 0.50$ ,  $\lambda_0 = 1.00$ ,  $ARL_0 \in (370, 500)$  and  $\theta_e \in (0.05, 0.10, 0.15)$ )

| $\theta_e$ | $K$   | $EM$      | $VM$      | $\Delta_\gamma$ | $\Delta_\lambda$ | $ARL$   | $SDRL$  | $q10$ | $q25$  | $q50$  | $q75$  | $q90$  | $K$           | $ARL$   | $SDRL$  | $q10$ | $q25$  | $q50$  | $q75$  | $q90$   |
|------------|-------|-----------|-----------|-----------------|------------------|---------|---------|-------|--------|--------|--------|--------|---------------|---------|---------|-------|--------|--------|--------|---------|
| Case 1     |       |           |           |                 |                  |         |         |       |        |        |        |        |               |         |         |       |        |        |        |         |
| $\phi=290$ |       |           |           |                 |                  |         |         |       |        |        |        |        | $ARL_0 = 500$ |         |         |       |        |        |        |         |
| 0.05       | 2.688 | 0.1811987 | 0.0092639 | 1.00            | 1.00             | 370.573 | 357.498 | 53.00 | 118.00 | 261.00 | 501.00 | 831.00 | 2.893         | 500.062 | 482.891 | 66.00 | 154.00 | 349.00 | 688.00 | 1135.00 |
| 0.05       | 2.688 | 0.1811987 | 0.0092639 | 1.10            | 1.10             | 20.404  | 9.946   | 10.00 | 13.00  | 18.00  | 25.00  | 33.00  | 2.893         | 21.928  | 10.642  | 11.00 | 14.00  | 20.00  | 27.00  | 36.00   |
| 0.05       | 2.688 | 0.1811987 | 0.0092639 | 1.20            | 1.10             | 8.748   | 2.768   | 6.00  | 7.00   | 8.00   | 10.00  | 12.00  | 2.893         | 9.218   | 2.885   | 6.00  | 7.00   | 9.00   | 11.00  | 13.00   |
| 0.05       | 2.688 | 0.1811987 | 0.0092639 | 1.30            | 1.10             | 5.688   | 1.440   | 4.00  | 5.00   | 6.00   | 7.00   | 8.00   | 2.893         | 5.951   | 1.493   | 4.00  | 5.00   | 6.00   | 7.00   | 8.00    |
| 0.05       | 2.688 | 0.1811987 | 0.0092639 | 1.40            | 1.10             | 4.332   | 0.963   | 3.00  | 4.00   | 4.00   | 5.00   | 6.00   | 2.893         | 4.508   | 0.981   | 3.00  | 4.00   | 4.00   | 5.00   | 6.00    |
| 0.05       | 2.688 | 0.1811987 | 0.0092639 | 0.90            | 1.10             | 19.139  | 8.543   | 10.00 | 13.00  | 17.00  | 23.00  | 30.00  | 2.893         | 20.655  | 9.377   | 11.00 | 14.00  | 19.00  | 25.00  | 33.00   |
| 0.05       | 2.688 | 0.1811987 | 0.0092639 | 0.80            | 1.10             | 7.926   | 2.183   | 5.00  | 6.00   | 8.00   | 9.00   | 11.00  | 2.893         | 8.328   | 2.315   | 6.00  | 7.00   | 8.00   | 10.00  | 11.00   |
| 0.05       | 2.688 | 0.1811987 | 0.0092639 | 0.70            | 1.10             | 5.009   | 1.068   | 4.00  | 4.00   | 5.00   | 6.00   | 6.00   | 2.893         | 5.212   | 1.092   | 4.00  | 4.00   | 5.00   | 6.00   | 7.00    |
| 0.05       | 2.688 | 0.1811987 | 0.0092639 | 0.60            | 1.10             | 3.670   | 0.654   | 3.00  | 3.00   | 4.00   | 4.00   | 4.00   | 2.893         | 3.846   | 0.678   | 3.00  | 3.00   | 4.00   | 4.00   | 5.00    |
| 0.05       | 2.688 | 0.1811987 | 0.0092639 | 0.50            | 1.10             | 2.978   | 0.425   | 2.00  | 3.00   | 3.00   | 3.00   | 3.00   | 2.893         | 3.070   | 0.415   | 3.00  | 3.00   | 3.00   | 3.00   | 4.00    |
| 0.05       | 2.688 | 0.1811987 | 0.0092639 | 1.10            | 1.20             | 20.114  | 9.762   | 10.00 | 13.00  | 18.00  | 25.00  | 33.00  | 2.893         | 21.519  | 10.516  | 11.00 | 14.00  | 19.00  | 26.00  | 35.00   |
| 0.05       | 2.688 | 0.1811987 | 0.0092639 | 1.20            | 1.20             | 8.742   | 2.768   | 6.00  | 7.00   | 8.00   | 10.00  | 12.00  | 2.893         | 9.213   | 2.893   | 6.00  | 7.00   | 9.00   | 11.00  | 13.00   |
| 0.05       | 2.688 | 0.1811987 | 0.0092639 | 1.30            | 1.20             | 5.699   | 1.431   | 4.00  | 5.00   | 6.00   | 7.00   | 8.00   | 2.893         | 5.946   | 1.481   | 4.00  | 5.00   | 6.00   | 7.00   | 8.00    |
| 0.05       | 2.688 | 0.1811987 | 0.0092639 | 1.40            | 1.20             | 4.348   | 0.950   | 3.00  | 4.00   | 4.00   | 5.00   | 6.00   | 2.893         | 4.516   | 0.977   | 3.00  | 4.00   | 4.00   | 5.00   | 6.00    |
| 0.05       | 2.688 | 0.1811987 | 0.0092639 | 0.90            | 1.20             | 18.941  | 8.525   | 10.00 | 13.00  | 17.00  | 23.00  | 30.00  | 2.893         | 20.368  | 9.151   | 11.00 | 14.00  | 18.00  | 25.00  | 32.00   |
| 0.05       | 2.688 | 0.1811987 | 0.0092639 | 0.80            | 1.20             | 7.971   | 2.219   | 5.00  | 6.00   | 8.00   | 9.00   | 11.00  | 2.893         | 8.333   | 2.289   | 6.00  | 7.00   | 8.00   | 10.00  | 11.00   |
| 0.05       | 2.688 | 0.1811987 | 0.0092639 | 0.70            | 1.20             | 5.001   | 1.056   | 4.00  | 4.00   | 5.00   | 6.00   | 6.00   | 2.893         | 5.249   | 1.100   | 4.00  | 4.00   | 5.00   | 6.00   | 7.00    |
| 0.05       | 2.688 | 0.1811987 | 0.0092639 | 0.60            | 1.20             | 3.682   | 0.669   | 3.00  | 3.00   | 4.00   | 4.00   | 4.00   | 2.893         | 3.842   | 0.687   | 3.00  | 3.00   | 4.00   | 4.00   | 5.00    |
| 0.05       | 2.688 | 0.1811987 | 0.0092639 | 0.50            | 1.20             | 2.963   | 0.426   | 2.00  | 3.00   | 3.00   | 3.00   | 3.00   | 2.893         | 3.069   | 0.417   | 3.00  | 3.00   | 3.00   | 3.00   | 4.00    |
| 0.05       | 2.688 | 0.1811987 | 0.0092639 | 1.10            | 1.30             | 20.023  | 9.569   | 10.00 | 13.00  | 18.00  | 25.00  | 33.00  | 2.893         | 21.433  | 10.168  | 11.00 | 14.00  | 19.00  | 26.00  | 35.00   |
| 0.05       | 2.688 | 0.1811987 | 0.0092639 | 1.20            | 1.30             | 8.713   | 2.754   | 6.00  | 7.00   | 8.00   | 10.00  | 12.00  | 2.893         | 9.229   | 2.879   | 6.00  | 7.00   | 9.00   | 11.00  | 13.00   |
| 0.05       | 2.688 | 0.1811987 | 0.0092639 | 1.30            | 1.30             | 5.713   | 1.451   | 4.00  | 5.00   | 6.00   | 7.00   | 8.00   | 2.893         | 5.954   | 1.481   | 4.00  | 5.00   | 6.00   | 7.00   | 8.00    |
| 0.05       | 2.688 | 0.1811987 | 0.0092639 | 1.40            | 1.30             | 4.331   | 0.948   | 3.00  | 4.00   | 4.00   | 5.00   | 6.00   | 2.893         | 4.533   | 0.993   | 3.00  | 4.00   | 4.00   | 5.00   | 6.00    |
| 0.05       | 2.688 | 0.1811987 | 0.0092639 | 0.90            | 1.30             | 19.098  | 8.731   | 10.00 | 13.00  | 17.00  | 23.00  | 31.00  | 2.893         | 20.419  | 9.186   | 11.00 | 14.00  | 19.00  | 25.00  | 33.00   |
| 0.05       | 2.688 | 0.1811987 | 0.0092639 | 0.80            | 1.30             | 7.957   | 2.219   | 5.00  | 6.00   | 8.00   | 9.00   | 11.00  | 2.893         | 8.332   | 2.282   | 6.00  | 7.00   | 8.00   | 10.00  | 11.00   |
| 0.05       | 2.688 | 0.1811987 | 0.0092639 | 0.70            | 1.30             | 5.018   | 1.064   | 4.00  | 4.00   | 5.00   | 6.00   | 6.00   | 2.893         | 5.221   | 1.093   | 4.00  | 4.00   | 5.00   | 6.00   | 7.00    |
| 0.05       | 2.688 | 0.1811987 | 0.0092639 | 0.60            | 1.30             | 3.673   | 0.654   | 3.00  | 3.00   | 4.00   | 4.00   | 4.00   | 2.893         | 3.831   | 0.673   | 3.00  | 3.00   | 4.00   | 4.00   | 5.00    |
| 0.05       | 2.688 | 0.1811987 | 0.0092639 | 0.50            | 1.30             | 2.969   | 0.428   | 2.00  | 3.00   | 3.00   | 3.00   | 3.00   | 2.893         | 3.072   | 0.409   | 3.00  | 3.00   | 3.00   | 3.00   | 4.00    |
| 0.05       | 2.688 | 0.1811987 | 0.0092639 | 1.10            | 1.40             | 20.009  | 9.609   | 10.00 | 13.00  | 18.00  | 25.00  | 33.00  | 2.893         | 21.193  | 9.941   | 11.00 | 14.00  | 19.00  | 26.00  | 34.00   |
| 0.05       | 2.688 | 0.1811987 | 0.0092639 | 1.20            | 1.40             | 8.698   | 2.748   | 6.00  | 7.00   | 8.00   | 10.00  | 12.00  | 2.893         | 9.178   | 2.879   | 6.00  | 7.00   | 9.00   | 11.00  | 13.00   |
| 0.05       | 2.688 | 0.1811987 | 0.0092639 | 1.30            | 1.40             | 5.703   | 1.441   | 4.00  | 5.00   | 6.00   | 7.00   | 8.00   | 2.893         | 6.004   | 1.522   | 4.00  | 5.00   | 6.00   | 7.00   | 8.00    |
| 0.05       | 2.688 | 0.1811987 | 0.0092639 | 1.40            | 1.40             | 4.332   | 0.950   | 3.00  | 4.00   | 4.00   | 5.00   | 6.00   | 2.893         | 4.528   | 0.985   | 3.00  | 4.00   | 4.00   | 5.00   | 6.00    |
| 0.05       | 2.688 | 0.1811987 | 0.0092639 | 0.90            | 1.40             | 18.739  | 8.440   | 10.00 | 13.00  | 17.00  | 23.00  | 30.00  | 2.893         | 20.182  | 8.899   | 11.00 | 14.00  | 18.00  | 25.00  | 32.00   |
| 0.05       | 2.688 | 0.1811987 | 0.0092639 | 0.80            | 1.40             | 7.926   | 2.221   | 5.00  | 6.00   | 8.00   | 9.00   | 11.00  | 2.893         | 8.348   | 2.341   | 6.00  | 7.00   | 8.00   | 10.00  | 11.00   |
| 0.05       | 2.688 | 0.1811987 | 0.0092639 | 0.70            | 1.40             | 4.998   | 1.045   | 4.00  | 4.00   | 5.00   | 6.00   | 6.00   | 2.893         | 5.239   | 1.107   | 4.00  | 4.00   | 5.00   | 6.00   | 7.00    |
| 0.05       | 2.688 | 0.1811987 | 0.0092639 | 0.60            | 1.40             | 3.675   | 0.653   | 3.00  | 3.00   | 4.00   | 4.00   | 4.00   | 2.893         | 3.838   | 0.676   | 3.00  | 3.00   | 4.00   | 4.00   | 5.00    |
| 0.05       | 2.688 | 0.1811987 | 0.0092639 | 0.50            | 1.40             | 2.972   | 0.422   | 2.00  | 3.00   | 3.00   | 3.00   | 3.00   | 2.893         | 3.073   | 0.410   | 3.00  | 3.00   | 3.00   | 3.00   | 4.00    |
| 0.05       | 2.688 | 0.1811987 | 0.0092639 | 1.10            | 0.90             | 20.731  | 10.160  | 10.00 | 14.00  | 19.00  | 26.00  | 34.00  | 2.893         | 21.962  | 10.758  | 11.00 | 14.00  | 20.00  | 27.00  | 36.00   |
| 0.05       | 2.688 | 0.1811987 | 0.0092639 | 1.20            | 0.90             | 8.737   | 2.756   | 6.00  | 7.00   | 8.00   | 10.00  | 12.00  | 2.893         | 9.193   | 2.926   | 6.00  | 7.00   | 9.00   | 11.00  | 13.00   |
| 0.05       | 2.688 | 0.1811987 | 0.0092639 | 1.30            | 0.90             | 5.705   | 1.446   | 4.00  | 5.00   | 6.00   | 7.00   | 8.00   | 2.893         | 6.004   | 1.526   | 4.00  | 5.00   | 6.00   | 7.00   | 8.00    |
| 0.05       | 2.688 | 0.1811987 | 0.0092639 | 1.40            | 0.90             | 4.323   | 0.952   | 3.00  | 4.00   | 4.00   | 5.00   | 6.00   | 2.893         | 4.517   | 0.988   | 3.00  | 4.00   | 4.00   | 5.00   | 6.00    |
| 0.05       | 2.688 | 0.1811987 | 0.0092639 | 0.90            | 0.90             | 19.437  | 8.855   | 10.00 | 13.00  | 18.00  | 24.00  | 31.00  | 2.893         | 20.688  | 9.326   | 11.00 | 14.00  | 19.00  | 25.00  | 33.00   |
| 0.05       | 2.688 | 0.1811987 | 0.0092639 | 0.80            | 0.90             | 7.922   | 2.258   | 5.00  | 6.00   | 8.00   | 9.00   | 11.00  | 2.893         | 8.308   | 2.331   | 6.00  | 7.00   | 8.00   | 10.00  | 11.00   |
| 0.05       | 2.688 | 0.1811987 | 0.0092639 | 0.70            | 0.90             | 5.015   | 1.083   | 4.00  | 4.00   | 5.00   | 6.00   | 6.00   | 2.893         | 5.239   | 1.084   | 4.00  | 4.00   | 5.00   | 6.00   | 7.00    |
| 0.05       | 2.688 | 0.1811987 | 0.0092639 | 0.60            | 0.90             | 3.669   | 0.659   | 3.00  | 3.00   | 4.00   | 4.00   | 4.00   | 2.893         | 3.829   | 0.673   | 3.00  | 3.00   | 4.00   | 4.00   | 5.00    |
| 0.05       | 2.688 | 0.1811987 | 0.0092639 | 0.50            | 0.90             | 2.976   | 0.418   | 3.00  | 3.00   | 3.00   | 3.00   | 3.00   | 2.893         | 3.075   | 0.411   | 3.00  | 3.00   | 3.00   | 3.00   | 4.00    |
| 0.05       | 2.688 | 0.1811987 | 0.0092639 | 1.10            | 0.80             | 20.487  | 9.968   | 10.00 | 13.00  | 18.00  | 25.00  | 33.00  | 2.893         | 21.914  | 10.586  | 11.00 | 14.00  | 20.00  | 27.00  | 36.00   |

|      |       |           |           |      |      |         |         |       |        |        |        |        |       |         |         |       |        |        |        |         |
|------|-------|-----------|-----------|------|------|---------|---------|-------|--------|--------|--------|--------|-------|---------|---------|-------|--------|--------|--------|---------|
| 0.05 | 2.688 | 0.1811987 | 0.0092639 | 1.20 | 0.80 | 8.781   | 2.836   | 6.00  | 7.00   | 8.00   | 10.00  | 13.00  | 2.893 | 9.204   | 2.879   | 6.00  | 7.00   | 9.00   | 11.00  | 13.00   |
| 0.05 | 2.688 | 0.1811987 | 0.0092639 | 1.30 | 0.80 | 5.707   | 1.436   | 4.00  | 5.00   | 6.00   | 7.00   | 8.00   | 2.893 | 5.985   | 1.499   | 4.00  | 5.00   | 6.00   | 7.00   | 8.00    |
| 0.05 | 2.688 | 0.1811987 | 0.0092639 | 1.40 | 0.80 | 4.334   | 0.965   | 3.00  | 4.00   | 4.00   | 5.00   | 6.00   | 2.893 | 4.510   | 0.977   | 3.00  | 4.00   | 4.00   | 5.00   | 6.00    |
| 0.05 | 2.688 | 0.1811987 | 0.0092639 | 0.90 | 0.80 | 19.316  | 8.902   | 10.00 | 13.00  | 17.00  | 24.00  | 31.00  | 2.893 | 20.619  | 9.375   | 11.00 | 14.00  | 19.00  | 25.00  | 33.00   |
| 0.05 | 2.688 | 0.1811987 | 0.0092639 | 0.80 | 0.80 | 7.926   | 2.229   | 5.00  | 6.00   | 8.00   | 9.00   | 11.00  | 2.893 | 8.336   | 2.332   | 6.00  | 7.00   | 8.00   | 10.00  | 11.00   |
| 0.05 | 2.688 | 0.1811987 | 0.0092639 | 0.70 | 0.80 | 4.985   | 1.072   | 4.00  | 4.00   | 5.00   | 6.00   | 6.00   | 2.893 | 5.222   | 1.095   | 4.00  | 4.00   | 5.00   | 6.00   | 7.00    |
| 0.05 | 2.688 | 0.1811987 | 0.0092639 | 0.60 | 0.80 | 3.674   | 0.661   | 3.00  | 3.00   | 4.00   | 4.00   | 4.00   | 2.893 | 3.830   | 0.678   | 3.00  | 3.00   | 4.00   | 4.00   | 5.00    |
| 0.05 | 2.688 | 0.1811987 | 0.0092639 | 0.50 | 0.80 | 2.970   | 0.435   | 2.00  | 3.00   | 3.00   | 3.00   | 3.00   | 2.893 | 3.070   | 0.414   | 3.00  | 3.00   | 3.00   | 3.00   | 4.00    |
| 0.05 | 2.688 | 0.1811987 | 0.0092639 | 1.10 | 0.70 | 20.283  | 9.848   | 10.00 | 13.00  | 18.00  | 25.00  | 33.00  | 2.893 | 21.763  | 10.416  | 11.00 | 14.00  | 20.00  | 27.00  | 35.00   |
| 0.05 | 2.688 | 0.1811987 | 0.0092639 | 1.20 | 0.70 | 8.750   | 2.781   | 6.00  | 7.00   | 8.00   | 10.00  | 12.00  | 2.893 | 9.191   | 2.879   | 6.00  | 7.00   | 9.00   | 11.00  | 13.00   |
| 0.05 | 2.688 | 0.1811987 | 0.0092639 | 1.30 | 0.70 | 5.706   | 1.447   | 4.00  | 5.00   | 6.00   | 7.00   | 8.00   | 2.893 | 5.970   | 1.498   | 4.00  | 5.00   | 6.00   | 7.00   | 8.00    |
| 0.05 | 2.688 | 0.1811987 | 0.0092639 | 1.40 | 0.70 | 4.339   | 0.954   | 3.00  | 4.00   | 4.00   | 5.00   | 6.00   | 2.893 | 4.512   | 0.983   | 3.00  | 4.00   | 4.00   | 5.00   | 6.00    |
| 0.05 | 2.688 | 0.1811987 | 0.0092639 | 0.90 | 0.70 | 19.225  | 8.615   | 10.00 | 13.00  | 17.00  | 24.00  | 31.00  | 2.893 | 20.513  | 9.216   | 11.00 | 14.00  | 19.00  | 25.00  | 33.00   |
| 0.05 | 2.688 | 0.1811987 | 0.0092639 | 0.80 | 0.70 | 7.927   | 2.242   | 5.00  | 6.00   | 8.00   | 9.00   | 11.00  | 2.893 | 8.320   | 2.294   | 6.00  | 7.00   | 8.00   | 10.00  | 11.00   |
| 0.05 | 2.688 | 0.1811987 | 0.0092639 | 0.70 | 0.70 | 5.011   | 1.059   | 4.00  | 4.00   | 5.00   | 6.00   | 6.00   | 2.893 | 5.220   | 1.086   | 4.00  | 4.00   | 5.00   | 6.00   | 7.00    |
| 0.05 | 2.688 | 0.1811987 | 0.0092639 | 0.60 | 0.70 | 3.668   | 0.659   | 3.00  | 3.00   | 4.00   | 4.00   | 4.00   | 2.893 | 3.830   | 0.673   | 3.00  | 3.00   | 4.00   | 4.00   | 5.00    |
| 0.05 | 2.688 | 0.1811987 | 0.0092639 | 0.50 | 0.70 | 2.968   | 0.420   | 2.00  | 3.00   | 3.00   | 3.00   | 3.00   | 2.893 | 3.081   | 0.424   | 3.00  | 3.00   | 3.00   | 3.00   | 4.00    |
| 0.05 | 2.688 | 0.1811987 | 0.0092639 | 1.10 | 0.60 | 20.268  | 9.674   | 10.00 | 13.00  | 18.00  | 25.00  | 33.00  | 2.893 | 21.665  | 10.090  | 11.00 | 14.00  | 20.00  | 27.00  | 35.00   |
| 0.05 | 2.688 | 0.1811987 | 0.0092639 | 1.20 | 0.60 | 8.722   | 2.789   | 6.00  | 7.00   | 8.00   | 10.00  | 12.00  | 2.893 | 9.200   | 2.858   | 6.00  | 7.00   | 9.00   | 11.00  | 13.00   |
| 0.05 | 2.688 | 0.1811987 | 0.0092639 | 1.30 | 0.60 | 5.701   | 1.441   | 4.00  | 5.00   | 6.00   | 7.00   | 8.00   | 2.893 | 5.981   | 1.513   | 4.00  | 5.00   | 6.00   | 7.00   | 8.00    |
| 0.05 | 2.688 | 0.1811987 | 0.0092639 | 1.40 | 0.60 | 4.345   | 0.962   | 3.00  | 4.00   | 4.00   | 5.00   | 6.00   | 2.893 | 4.496   | 0.981   | 3.00  | 4.00   | 4.00   | 5.00   | 6.00    |
| 0.05 | 2.688 | 0.1811987 | 0.0092639 | 0.90 | 0.60 | 19.040  | 8.218   | 10.00 | 13.00  | 17.00  | 23.00  | 30.00  | 2.893 | 20.413  | 9.183   | 11.00 | 14.00  | 19.00  | 25.00  | 33.00   |
| 0.05 | 2.688 | 0.1811987 | 0.0092639 | 0.80 | 0.60 | 7.965   | 2.250   | 5.00  | 6.00   | 8.00   | 9.00   | 11.00  | 2.893 | 8.373   | 2.319   | 6.00  | 7.00   | 8.00   | 10.00  | 11.00   |
| 0.05 | 2.688 | 0.1811987 | 0.0092639 | 0.70 | 0.60 | 4.999   | 1.064   | 4.00  | 4.00   | 5.00   | 6.00   | 6.00   | 2.893 | 5.232   | 1.091   | 4.00  | 4.00   | 5.00   | 6.00   | 7.00    |
| 0.05 | 2.688 | 0.1811987 | 0.0092639 | 0.60 | 0.60 | 3.675   | 0.665   | 3.00  | 3.00   | 4.00   | 4.00   | 4.00   | 2.893 | 3.820   | 0.667   | 3.00  | 3.00   | 4.00   | 4.00   | 5.00    |
| 0.05 | 2.688 | 0.1811987 | 0.0092639 | 0.50 | 0.60 | 2.973   | 0.429   | 2.00  | 3.00   | 3.00   | 3.00   | 3.00   | 2.893 | 3.070   | 0.409   | 3.00  | 3.00   | 3.00   | 3.00   | 4.00    |
| 0.05 | 2.688 | 0.1811987 | 0.0092639 | 1.10 | 0.50 | 19.913  | 8.955   | 10.00 | 13.00  | 18.00  | 25.00  | 32.00  | 2.893 | 21.262  | 9.757   | 11.00 | 14.00  | 19.00  | 26.00  | 34.00   |
| 0.05 | 2.688 | 0.1811987 | 0.0092639 | 1.20 | 0.50 | 8.741   | 2.761   | 6.00  | 7.00   | 8.00   | 10.00  | 12.00  | 2.893 | 9.195   | 2.908   | 6.00  | 7.00   | 9.00   | 11.00  | 13.00   |
| 0.05 | 2.688 | 0.1811987 | 0.0092639 | 1.30 | 0.50 | 5.733   | 1.453   | 4.00  | 5.00   | 6.00   | 7.00   | 8.00   | 2.893 | 5.971   | 1.498   | 4.00  | 5.00   | 6.00   | 7.00   | 8.00    |
| 0.05 | 2.688 | 0.1811987 | 0.0092639 | 1.40 | 0.50 | 4.312   | 0.952   | 3.00  | 4.00   | 4.00   | 5.00   | 5.00   | 2.893 | 4.523   | 0.972   | 3.00  | 4.00   | 4.00   | 5.00   | 6.00    |
| 0.05 | 2.688 | 0.1811987 | 0.0092639 | 0.90 | 0.50 | 18.811  | 8.042   | 10.00 | 13.00  | 17.00  | 23.00  | 29.00  | 2.893 | 20.238  | 8.756   | 11.00 | 14.00  | 18.00  | 25.00  | 32.00   |
| 0.05 | 2.688 | 0.1811987 | 0.0092639 | 0.80 | 0.50 | 7.947   | 2.225   | 5.00  | 6.00   | 8.00   | 9.00   | 11.00  | 2.893 | 8.364   | 2.306   | 6.00  | 7.00   | 8.00   | 10.00  | 11.00   |
| 0.05 | 2.688 | 0.1811987 | 0.0092639 | 0.70 | 0.50 | 4.994   | 1.052   | 4.00  | 4.00   | 5.00   | 6.00   | 6.00   | 2.893 | 5.228   | 1.081   | 4.00  | 4.00   | 5.00   | 6.00   | 7.00    |
| 0.05 | 2.688 | 0.1811987 | 0.0092639 | 0.60 | 0.50 | 3.682   | 0.662   | 3.00  | 3.00   | 4.00   | 4.00   | 4.00   | 2.893 | 3.827   | 0.667   | 3.00  | 3.00   | 4.00   | 4.00   | 5.00    |
| 0.05 | 2.688 | 0.1811987 | 0.0092639 | 0.50 | 0.50 | 2.973   | 0.422   | 2.00  | 3.00   | 3.00   | 3.00   | 3.00   | 2.893 | 3.077   | 0.409   | 3.00  | 3.00   | 3.00   | 3.00   | 4.00    |
| 0.10 | 3.016 | 0.2591350 | 0.0188482 | 1.00 | 1.00 | 371.465 | 363.243 | 47.00 | 113.00 | 257.00 | 516.00 | 844.10 | 3.203 | 499.944 | 506.414 | 61.00 | 147.00 | 341.00 | 683.00 | 1137.10 |
| 0.10 | 3.016 | 0.2591350 | 0.0188482 | 1.10 | 1.10 | 20.266  | 12.649  | 8.00  | 11.00  | 17.00  | 25.00  | 37.00  | 3.203 | 22.201  | 14.151  | 9.00  | 12.00  | 19.00  | 28.00  | 40.00   |
| 0.10 | 3.016 | 0.2591350 | 0.0188482 | 1.20 | 1.10 | 7.602   | 2.954   | 4.00  | 5.00   | 7.00   | 9.00   | 11.00  | 3.203 | 7.977   | 3.107   | 5.00  | 6.00   | 7.00   | 10.00  | 12.00   |
| 0.10 | 3.016 | 0.2591350 | 0.0188482 | 1.30 | 1.10 | 4.750   | 1.432   | 3.00  | 4.00   | 5.00   | 6.00   | 7.00   | 3.203 | 4.928   | 1.471   | 3.00  | 4.00   | 5.00   | 6.00   | 7.00    |
| 0.10 | 3.016 | 0.2591350 | 0.0188482 | 1.40 | 1.10 | 3.564   | 0.918   | 3.00  | 3.00   | 4.00   | 5.00   | 5.00   | 3.203 | 3.678   | 0.941   | 3.00  | 3.00   | 4.00   | 4.00   | 5.00    |
| 0.10 | 3.016 | 0.2591350 | 0.0188482 | 0.90 | 1.10 | 19.001  | 10.922  | 8.00  | 11.00  | 16.00  | 24.00  | 34.00  | 3.203 | 21.011  | 12.412  | 9.00  | 12.00  | 18.00  | 26.00  | 37.00   |
| 0.10 | 3.016 | 0.2591350 | 0.0188482 | 0.80 | 1.10 | 6.789   | 2.294   | 4.00  | 5.00   | 6.00   | 8.00   | 10.00  | 3.203 | 7.152   | 2.445   | 5.00  | 5.00   | 7.00   | 8.00   | 10.00   |
| 0.10 | 3.016 | 0.2591350 | 0.0188482 | 0.70 | 1.10 | 4.125   | 1.024   | 3.00  | 3.00   | 4.00   | 5.00   | 5.00   | 3.203 | 4.279   | 1.056   | 3.00  | 4.00   | 4.00   | 5.00   | 6.00    |
| 0.10 | 3.016 | 0.2591350 | 0.0188482 | 0.60 | 1.10 | 3.011   | 0.640   | 2.00  | 3.00   | 3.00   | 3.00   | 4.00   | 3.203 | 3.116   | 0.627   | 2.00  | 3.00   | 3.00   | 3.00   | 4.00    |
| 0.10 | 3.016 | 0.2591350 | 0.0188482 | 0.50 | 1.10 | 2.339   | 0.483   | 2.00  | 2.00   | 2.00   | 3.00   | 3.00   | 3.203 | 2.418   | 0.512   | 2.00  | 2.00   | 2.00   | 3.00   | 3.00    |
| 0.10 | 3.016 | 0.2591350 | 0.0188482 | 1.10 | 1.20 | 20.230  | 12.545  | 8.00  | 11.00  | 17.00  | 26.00  | 37.00  | 3.203 | 21.788  | 13.396  | 9.00  | 12.00  | 19.00  | 28.00  | 39.00   |
| 0.10 | 3.016 | 0.2591350 | 0.0188482 | 1.20 | 1.20 | 7.597   | 2.984   | 4.00  | 5.00   | 7.00   | 9.00   | 12.00  | 3.203 | 7.964   | 3.087   | 5.00  | 6.00   | 7.00   | 10.00  | 12.00   |
| 0.10 | 3.016 | 0.2591350 | 0.0188482 | 1.30 | 1.20 | 4.776   | 1.447   | 3.00  | 4.00   | 5.00   | 6.00   | 7.00   | 3.203 | 4.958   | 1.487   | 3.00  | 4.00   | 5.00   | 6.00   | 7.00    |
| 0.10 | 3.016 | 0.2591350 | 0.0188482 | 1.40 | 1.20 | 3.559   | 0.917   | 3.00  | 3.00   | 3.00   | 4.00   | 5.00   | 3.203 | 3.680   | 0.941   | 3.00  | 3.00   | 4.00   | 4.00   | 5.00    |
| 0.10 | 3.016 | 0.2591350 | 0.0188482 | 0.90 | 1.20 | 19.056  | 11.073  | 8.00  | 11.00  | 16.00  | 24.00  | 33.00  | 3.203 | 20.509  | 12.063  | 9.00  | 12.00  | 17.00  | 26.00  | 36.00   |
| 0.10 | 3.016 | 0.2591350 | 0.0188482 | 0.80 | 1.20 | 6.762   | 2.270   | 4.00  | 5.00   | 6.00   | 8.00   | 10.00  | 3.203 | 7.148   | 2.408   | 5.00  | 5.00   | 7.00   | 8.00   | 10.00   |
| 0.10 | 3.016 | 0.2591350 | 0.0188482 | 0.70 | 1.20 | 4.130   | 1.026   | 3.00  | 3.00   | 4.00   | 5.00   | 5.00   | 3.203 | 4.285   | 1.067   | 3.00  | 4.00   | 4.00   | 5.00   | 6.00    |
| 0.10 | 3.016 | 0.2591350 | 0.0188482 | 0.60 | 1.20 | 3.013   | 0.624   | 2.00  | 3.00   | 3.00   | 3.00   | 4.00   | 3.203 | 3.118   | 0.622   | 2.00  | 3.00   | 3.00   | 3.00   | 4.00    |
| 0.10 | 3.016 | 0.2591350 | 0.0188482 | 0.50 | 1.20 | 2.334   | 0.484   | 2.00  | 2.00   | 2.00   | 3.00   | 3.00   | 3.203 | 2.414   | 0.507   | 2.00  | 2.00   | 2.00   | 3.00   | 3.00    |
| 0.10 | 3.016 | 0.2591350 | 0.0188482 | 1.10 | 1.30 | 20.064  | 11.990  | 8.00  | 11.00  | 17.00  | 26.00  | 36.00  | 3.203 | 21.512  | 13.197  | 9.00  | 12.00  | 18.00  | 27.00  | 39.00   |
| 0.10 | 3.016 | 0.2591350 | 0.0188482 | 1.20 | 1.30 | 7.628   | 2.980   | 4.00  | 5.00   | 7.00   | 9.00   | 11.00  | 3.203 | 7.953   | 3.088   | 5.00  | 6.00   | 7.00   | 10.00  | 12.00   |
| 0.10 | 3.016 | 0.2591350 | 0.0188482 | 1.30 | 1.30 | 4.774   | 1.428   | 3.00  | 4.00   | 5.00   | 6.00   | 7.00   | 3.203 | 4.963   | 1.505   | 3.00  | 4.00   | 5.00   | 6.00   | 7.00    |
| 0.10 | 3.016 | 0.2591350 | 0.0188482 | 1.40 | 1.30 | 3.564   | 0.915   | 3.00  | 3.00   | 3.00   | 4.00   | 5.00   | 3.203 | 3.696   | 0.930   |       |        |        |        |         |

|      |       |           |           |      |      |         |         |       |        |        |        |        |       |         |         |       |        |        |        |         |
|------|-------|-----------|-----------|------|------|---------|---------|-------|--------|--------|--------|--------|-------|---------|---------|-------|--------|--------|--------|---------|
| 0.10 | 3.016 | 0.2591350 | 0.0188482 | 0.50 | 1.30 | 2.329   | 0.483   | 2.00  | 2.00   | 2.00   | 3.00   | 3.00   | 3.203 | 2.421   | 0.514   | 2.00  | 2.00   | 2.00   | 3.00   | 3.00    |
| 0.10 | 3.016 | 0.2591350 | 0.0188482 | 1.10 | 1.40 | 19.741  | 11.864  | 8.00  | 11.00  | 17.00  | 25.00  | 35.00  | 3.203 | 21.227  | 12.934  | 9.00  | 12.00  | 18.00  | 27.00  | 38.00   |
| 0.10 | 3.016 | 0.2591350 | 0.0188482 | 1.20 | 1.40 | 7.592   | 2.934   | 4.00  | 5.00   | 7.00   | 9.00   | 11.00  | 3.203 | 7.937   | 3.014   | 5.00  | 6.00   | 7.00   | 10.00  | 12.00   |
| 0.10 | 3.016 | 0.2591350 | 0.0188482 | 1.30 | 1.40 | 4.739   | 1.438   | 3.00  | 4.00   | 5.00   | 6.00   | 7.00   | 3.203 | 4.963   | 1.488   | 3.00  | 4.00   | 5.00   | 6.00   | 7.00    |
| 0.10 | 3.016 | 0.2591350 | 0.0188482 | 1.40 | 1.40 | 3.551   | 0.913   | 3.00  | 3.00   | 3.00   | 4.00   | 5.00   | 3.203 | 3.700   | 0.946   | 3.00  | 3.00   | 4.00   | 4.00   | 5.00    |
| 0.10 | 3.016 | 0.2591350 | 0.0188482 | 0.90 | 1.40 | 18.621  | 10.577  | 8.00  | 11.00  | 16.00  | 23.00  | 32.00  | 3.203 | 20.267  | 11.913  | 9.00  | 12.00  | 17.00  | 25.00  | 36.00   |
| 0.10 | 3.016 | 0.2591350 | 0.0188482 | 0.80 | 1.40 | 6.804   | 2.303   | 4.00  | 5.00   | 6.00   | 8.00   | 10.00  | 3.203 | 7.122   | 2.406   | 5.00  | 5.00   | 7.00   | 8.00   | 10.00   |
| 0.10 | 3.016 | 0.2591350 | 0.0188482 | 0.70 | 1.40 | 4.129   | 1.022   | 3.00  | 3.00   | 4.00   | 5.00   | 5.00   | 3.203 | 4.280   | 1.048   | 3.00  | 4.00   | 4.00   | 5.00   | 6.00    |
| 0.10 | 3.016 | 0.2591350 | 0.0188482 | 0.60 | 1.40 | 3.005   | 0.629   | 2.00  | 3.00   | 3.00   | 3.00   | 4.00   | 3.203 | 3.121   | 0.626   | 2.00  | 3.00   | 3.00   | 3.00   | 4.00    |
| 0.10 | 3.016 | 0.2591350 | 0.0188482 | 0.50 | 1.40 | 2.331   | 0.481   | 2.00  | 2.00   | 2.00   | 3.00   | 3.00   | 3.203 | 2.416   | 0.510   | 2.00  | 2.00   | 2.00   | 3.00   | 3.00    |
| 0.10 | 3.016 | 0.2591350 | 0.0188482 | 1.10 | 0.90 | 20.254  | 12.595  | 8.00  | 11.00  | 17.00  | 26.00  | 37.00  | 3.203 | 22.450  | 14.050  | 9.00  | 13.00  | 19.00  | 29.00  | 41.00   |
| 0.10 | 3.016 | 0.2591350 | 0.0188482 | 1.20 | 0.90 | 7.606   | 3.000   | 4.00  | 5.00   | 7.00   | 9.00   | 11.00  | 3.203 | 7.977   | 3.101   | 5.00  | 6.00   | 7.00   | 10.00  | 12.00   |
| 0.10 | 3.016 | 0.2591350 | 0.0188482 | 1.30 | 0.90 | 4.771   | 1.447   | 3.00  | 4.00   | 5.00   | 6.00   | 7.00   | 3.203 | 4.979   | 1.518   | 3.00  | 4.00   | 5.00   | 6.00   | 7.00    |
| 0.10 | 3.016 | 0.2591350 | 0.0188482 | 1.40 | 0.90 | 3.564   | 0.916   | 3.00  | 3.00   | 3.00   | 4.00   | 5.00   | 3.203 | 3.677   | 0.937   | 3.00  | 3.00   | 4.00   | 4.00   | 5.00    |
| 0.10 | 3.016 | 0.2591350 | 0.0188482 | 0.90 | 0.90 | 19.315  | 11.277  | 8.00  | 11.00  | 17.00  | 24.00  | 34.00  | 3.203 | 20.939  | 12.210  | 9.00  | 12.00  | 18.00  | 26.00  | 37.00   |
| 0.10 | 3.016 | 0.2591350 | 0.0188482 | 0.80 | 0.90 | 6.823   | 2.329   | 4.00  | 5.00   | 6.00   | 8.00   | 10.00  | 3.203 | 7.093   | 2.407   | 4.00  | 5.00   | 7.00   | 8.00   | 10.00   |
| 0.10 | 3.016 | 0.2591350 | 0.0188482 | 0.70 | 0.90 | 4.112   | 1.023   | 3.00  | 3.00   | 4.00   | 5.00   | 5.00   | 3.203 | 4.293   | 1.066   | 3.00  | 4.00   | 4.00   | 5.00   | 6.00    |
| 0.10 | 3.016 | 0.2591350 | 0.0188482 | 0.60 | 0.90 | 3.015   | 0.626   | 2.00  | 3.00   | 3.00   | 3.00   | 4.00   | 3.203 | 3.116   | 0.621   | 2.00  | 3.00   | 3.00   | 3.00   | 4.00    |
| 0.10 | 3.016 | 0.2591350 | 0.0188482 | 0.50 | 0.90 | 2.328   | 0.481   | 2.00  | 2.00   | 2.00   | 3.00   | 3.00   | 3.203 | 2.421   | 0.511   | 2.00  | 2.00   | 2.00   | 3.00   | 3.00    |
| 0.10 | 3.016 | 0.2591350 | 0.0188482 | 1.10 | 0.80 | 20.696  | 12.847  | 8.00  | 12.00  | 17.00  | 26.00  | 38.00  | 3.203 | 22.335  | 13.825  | 9.00  | 12.00  | 19.00  | 28.00  | 40.00   |
| 0.10 | 3.016 | 0.2591350 | 0.0188482 | 1.20 | 0.80 | 7.621   | 2.975   | 4.00  | 6.00   | 7.00   | 9.00   | 12.00  | 3.203 | 8.001   | 3.119   | 5.00  | 6.00   | 7.00   | 10.00  | 12.00   |
| 0.10 | 3.016 | 0.2591350 | 0.0188482 | 1.30 | 0.80 | 4.756   | 1.461   | 3.00  | 4.00   | 5.00   | 6.00   | 7.00   | 3.203 | 4.978   | 1.503   | 3.00  | 4.00   | 5.00   | 6.00   | 7.00    |
| 0.10 | 3.016 | 0.2591350 | 0.0188482 | 1.40 | 0.80 | 3.558   | 0.914   | 3.00  | 3.00   | 3.00   | 4.00   | 5.00   | 3.203 | 3.694   | 0.944   | 3.00  | 3.00   | 4.00   | 4.00   | 5.00    |
| 0.10 | 3.016 | 0.2591350 | 0.0188482 | 0.90 | 0.80 | 19.336  | 11.542  | 8.00  | 11.00  | 16.00  | 24.00  | 34.00  | 3.203 | 20.915  | 12.445  | 9.00  | 12.00  | 18.00  | 26.00  | 37.00   |
| 0.10 | 3.016 | 0.2591350 | 0.0188482 | 0.80 | 0.80 | 6.812   | 2.325   | 4.00  | 5.00   | 6.00   | 8.00   | 10.00  | 3.203 | 7.133   | 2.419   | 5.00  | 5.00   | 7.00   | 8.00   | 10.00   |
| 0.10 | 3.016 | 0.2591350 | 0.0188482 | 0.70 | 0.80 | 4.109   | 1.025   | 3.00  | 3.00   | 4.00   | 5.00   | 5.00   | 3.203 | 4.296   | 1.082   | 3.00  | 4.00   | 4.00   | 5.00   | 6.00    |
| 0.10 | 3.016 | 0.2591350 | 0.0188482 | 0.60 | 0.80 | 3.004   | 0.621   | 2.00  | 3.00   | 3.00   | 3.00   | 4.00   | 3.203 | 3.113   | 0.634   | 2.00  | 3.00   | 3.00   | 3.00   | 4.00    |
| 0.10 | 3.016 | 0.2591350 | 0.0188482 | 0.50 | 0.80 | 2.325   | 0.481   | 2.00  | 2.00   | 2.00   | 3.00   | 3.00   | 3.203 | 2.429   | 0.516   | 2.00  | 2.00   | 2.00   | 3.00   | 3.00    |
| 0.10 | 3.016 | 0.2591350 | 0.0188482 | 1.10 | 0.70 | 20.692  | 13.080  | 8.00  | 11.00  | 17.00  | 26.00  | 38.00  | 3.203 | 22.569  | 13.902  | 9.00  | 13.00  | 19.00  | 29.00  | 41.00   |
| 0.10 | 3.016 | 0.2591350 | 0.0188482 | 1.20 | 0.70 | 7.583   | 2.921   | 4.00  | 6.00   | 7.00   | 9.00   | 11.00  | 3.203 | 7.977   | 3.086   | 5.00  | 6.00   | 7.00   | 10.00  | 12.00   |
| 0.10 | 3.016 | 0.2591350 | 0.0188482 | 1.30 | 0.70 | 4.744   | 1.437   | 3.00  | 4.00   | 5.00   | 6.00   | 7.00   | 3.203 | 4.944   | 1.482   | 3.00  | 4.00   | 5.00   | 6.00   | 7.00    |
| 0.10 | 3.016 | 0.2591350 | 0.0188482 | 1.40 | 0.70 | 3.555   | 0.926   | 3.00  | 3.00   | 3.00   | 4.00   | 5.00   | 3.203 | 3.701   | 0.947   | 3.00  | 3.00   | 4.00   | 4.00   | 5.00    |
| 0.10 | 3.016 | 0.2591350 | 0.0188482 | 0.90 | 0.70 | 19.445  | 11.153  | 8.00  | 12.00  | 17.00  | 24.00  | 34.00  | 3.203 | 20.825  | 12.295  | 9.00  | 12.00  | 18.00  | 26.00  | 37.00   |
| 0.10 | 3.016 | 0.2591350 | 0.0188482 | 0.80 | 0.70 | 6.811   | 2.343   | 4.00  | 5.00   | 6.00   | 8.00   | 10.00  | 3.203 | 7.160   | 2.415   | 5.00  | 5.00   | 7.00   | 8.00   | 10.00   |
| 0.10 | 3.016 | 0.2591350 | 0.0188482 | 0.70 | 0.70 | 4.121   | 1.043   | 3.00  | 3.00   | 4.00   | 5.00   | 5.00   | 3.203 | 4.309   | 1.056   | 3.00  | 4.00   | 4.00   | 5.00   | 6.00    |
| 0.10 | 3.016 | 0.2591350 | 0.0188482 | 0.60 | 0.70 | 3.003   | 0.627   | 2.00  | 3.00   | 3.00   | 3.00   | 4.00   | 3.203 | 3.133   | 0.631   | 2.00  | 3.00   | 3.00   | 3.00   | 4.00    |
| 0.10 | 3.016 | 0.2591350 | 0.0188482 | 0.50 | 0.70 | 2.333   | 0.484   | 2.00  | 2.00   | 2.00   | 3.00   | 3.00   | 3.203 | 2.416   | 0.511   | 2.00  | 2.00   | 2.00   | 3.00   | 3.00    |
| 0.10 | 3.016 | 0.2591350 | 0.0188482 | 1.10 | 0.60 | 20.439  | 12.390  | 8.00  | 12.00  | 17.00  | 26.00  | 37.00  | 3.203 | 22.529  | 14.075  | 9.00  | 13.00  | 19.00  | 28.00  | 41.00   |
| 0.10 | 3.016 | 0.2591350 | 0.0188482 | 1.20 | 0.60 | 7.590   | 2.977   | 4.00  | 5.00   | 7.00   | 9.00   | 11.00  | 3.203 | 7.925   | 3.080   | 5.00  | 6.00   | 7.00   | 10.00  | 12.00   |
| 0.10 | 3.016 | 0.2591350 | 0.0188482 | 1.30 | 0.60 | 4.744   | 1.412   | 3.00  | 4.00   | 5.00   | 6.00   | 7.00   | 3.203 | 4.970   | 1.487   | 3.00  | 4.00   | 5.00   | 6.00   | 7.00    |
| 0.10 | 3.016 | 0.2591350 | 0.0188482 | 1.40 | 0.60 | 3.554   | 0.919   | 3.00  | 3.00   | 3.00   | 4.00   | 5.00   | 3.203 | 3.689   | 0.935   | 3.00  | 3.00   | 4.00   | 4.00   | 5.00    |
| 0.10 | 3.016 | 0.2591350 | 0.0188482 | 0.90 | 0.60 | 19.271  | 11.211  | 8.00  | 11.00  | 16.00  | 24.00  | 34.00  | 3.203 | 20.872  | 12.180  | 9.00  | 12.00  | 18.00  | 26.00  | 36.10   |
| 0.10 | 3.016 | 0.2591350 | 0.0188482 | 0.80 | 0.60 | 6.824   | 2.356   | 4.00  | 5.00   | 6.00   | 8.00   | 10.00  | 3.203 | 7.151   | 2.459   | 4.00  | 5.00   | 7.00   | 8.00   | 10.00   |
| 0.10 | 3.016 | 0.2591350 | 0.0188482 | 0.70 | 0.60 | 4.129   | 1.040   | 3.00  | 3.00   | 4.00   | 5.00   | 5.00   | 3.203 | 4.298   | 1.072   | 3.00  | 4.00   | 4.00   | 5.00   | 6.00    |
| 0.10 | 3.016 | 0.2591350 | 0.0188482 | 0.60 | 0.60 | 3.006   | 0.620   | 2.00  | 3.00   | 3.00   | 3.00   | 4.00   | 3.203 | 3.110   | 0.633   | 2.00  | 3.00   | 3.00   | 3.00   | 4.00    |
| 0.10 | 3.016 | 0.2591350 | 0.0188482 | 0.50 | 0.60 | 2.333   | 0.482   | 2.00  | 2.00   | 2.00   | 3.00   | 3.00   | 3.203 | 2.423   | 0.509   | 2.00  | 2.00   | 2.00   | 3.00   | 3.00    |
| 0.10 | 3.016 | 0.2591350 | 0.0188482 | 1.10 | 0.50 | 20.283  | 12.057  | 8.00  | 12.00  | 17.00  | 26.00  | 36.00  | 3.203 | 21.899  | 13.266  | 9.00  | 13.00  | 19.00  | 28.00  | 39.00   |
| 0.10 | 3.016 | 0.2591350 | 0.0188482 | 1.20 | 0.50 | 7.599   | 2.936   | 4.00  | 6.00   | 7.00   | 9.00   | 11.00  | 3.203 | 8.017   | 3.114   | 5.00  | 6.00   | 7.00   | 10.00  | 12.00   |
| 0.10 | 3.016 | 0.2591350 | 0.0188482 | 1.30 | 0.50 | 4.771   | 1.446   | 3.00  | 4.00   | 5.00   | 6.00   | 7.00   | 3.203 | 4.958   | 1.497   | 3.00  | 4.00   | 5.00   | 6.00   | 7.00    |
| 0.10 | 3.016 | 0.2591350 | 0.0188482 | 1.40 | 0.50 | 3.553   | 0.910   | 3.00  | 3.00   | 3.00   | 4.00   | 5.00   | 3.203 | 3.691   | 0.930   | 3.00  | 3.00   | 4.00   | 4.00   | 5.00    |
| 0.10 | 3.016 | 0.2591350 | 0.0188482 | 0.90 | 0.50 | 19.095  | 11.027  | 8.00  | 11.00  | 16.00  | 24.00  | 33.00  | 3.203 | 21.086  | 12.381  | 9.00  | 12.00  | 18.00  | 26.00  | 37.00   |
| 0.10 | 3.016 | 0.2591350 | 0.0188482 | 0.80 | 0.50 | 6.843   | 2.331   | 4.00  | 5.00   | 6.00   | 8.00   | 10.00  | 3.203 | 7.110   | 2.438   | 4.00  | 5.00   | 7.00   | 8.00   | 10.00   |
| 0.10 | 3.016 | 0.2591350 | 0.0188482 | 0.70 | 0.50 | 4.119   | 1.038   | 3.00  | 3.00   | 4.00   | 5.00   | 5.00   | 3.203 | 4.304   | 1.063   | 3.00  | 4.00   | 4.00   | 5.00   | 6.00    |
| 0.10 | 3.016 | 0.2591350 | 0.0188482 | 0.60 | 0.50 | 3.009   | 0.628   | 2.00  | 3.00   | 3.00   | 3.00   | 4.00   | 3.203 | 3.116   | 0.637   | 2.00  | 3.00   | 3.00   | 3.00   | 4.00    |
| 0.10 | 3.016 | 0.2591350 | 0.0188482 | 0.50 | 0.50 | 2.339   | 0.484   | 2.00  | 2.00   | 2.00   | 3.00   | 3.00   | 3.203 | 2.424   | 0.509   | 2.00  | 2.00   | 2.00   | 3.00   | 3.00    |
| 0.15 | 3.194 | 0.3222067 | 0.0286625 | 1.00 | 1.00 | 370.018 | 367.745 | 41.00 | 107.00 | 255.00 | 514.00 | 841.00 | 3.375 | 500.824 | 493.943 | 56.00 | 148.00 | 350.00 | 692.00 | 1147.00 |
| 0.15 | 3.194 | 0.3222067 | 0.0286625 | 1.10 | 1.10 | 22.108  | 16.014  | 7.00  | 11.00  | 18.00  | 28.00  | 43.00  | 3.375 | 24.746  | 18.035  | 8.00  | 12.00  | 20.00  | 32.00  | 48.00   |
| 0.15 | 3.194 | 0.3222067 | 0.0286625 | 1.20 | 1.10 | 7.251   | 3.231   | 4.00  | 5.00   | 7.00   | 9.00   | 11.00  | 3.375 | 7.658   | 3.426   |       |        |        |        |         |

|      |       |           |           |      |      |        |        |      |       |       |       |       |       |        |        |      |       |       |       |       |
|------|-------|-----------|-----------|------|------|--------|--------|------|-------|-------|-------|-------|-------|--------|--------|------|-------|-------|-------|-------|
| 0.15 | 3.194 | 0.3222067 | 0.0286625 | 0.70 | 1.10 | 3.749  | 1.057  | 3.00 | 3.00  | 4.00  | 4.00  | 5.00  | 3.375 | 3.882  | 1.083  | 3.00 | 3.00  | 4.00  | 4.00  | 5.00  |
| 0.15 | 3.194 | 0.3222067 | 0.0286625 | 0.60 | 1.10 | 2.662  | 0.635  | 2.00 | 2.00  | 3.00  | 3.00  | 3.00  | 3.375 | 2.763  | 0.655  | 2.00 | 2.00  | 3.00  | 3.00  | 4.00  |
| 0.15 | 3.194 | 0.3222067 | 0.0286625 | 0.50 | 1.10 | 2.117  | 0.334  | 2.00 | 2.00  | 2.00  | 2.00  | 3.00  | 3.375 | 2.166  | 0.382  | 2.00 | 2.00  | 2.00  | 2.00  | 3.00  |
| 0.15 | 3.194 | 0.3222067 | 0.0286625 | 1.10 | 1.20 | 21.926 | 15.797 | 7.00 | 11.00 | 18.00 | 28.00 | 42.00 | 3.375 | 23.803 | 17.130 | 8.00 | 12.00 | 19.00 | 31.00 | 46.00 |
| 0.15 | 3.194 | 0.3222067 | 0.0286625 | 1.20 | 1.20 | 7.237  | 3.257  | 4.00 | 5.00  | 7.00  | 9.00  | 11.00 | 3.375 | 7.625  | 3.405  | 4.00 | 5.00  | 7.00  | 9.00  | 12.00 |
| 0.15 | 3.194 | 0.3222067 | 0.0286625 | 1.30 | 1.20 | 4.355  | 1.465  | 3.00 | 3.00  | 4.00  | 5.00  | 6.00  | 3.375 | 4.534  | 1.521  | 3.00 | 3.00  | 4.00  | 5.00  | 6.00  |
| 0.15 | 3.194 | 0.3222067 | 0.0286625 | 1.40 | 1.20 | 3.197  | 0.920  | 2.00 | 3.00  | 3.00  | 4.00  | 4.00  | 3.375 | 3.328  | 0.943  | 2.00 | 3.00  | 3.00  | 4.00  | 5.00  |
| 0.15 | 3.194 | 0.3222067 | 0.0286625 | 0.90 | 1.20 | 20.855 | 14.156 | 8.00 | 11.00 | 17.00 | 26.00 | 39.00 | 3.375 | 23.534 | 16.498 | 8.00 | 12.00 | 19.00 | 30.00 | 45.00 |
| 0.15 | 3.194 | 0.3222067 | 0.0286625 | 0.80 | 1.20 | 6.403  | 2.545  | 4.00 | 5.00  | 6.00  | 8.00  | 10.00 | 3.375 | 6.743  | 2.684  | 4.00 | 5.00  | 6.00  | 8.00  | 10.00 |
| 0.15 | 3.194 | 0.3222067 | 0.0286625 | 0.70 | 1.20 | 3.716  | 1.037  | 3.00 | 3.00  | 4.00  | 4.00  | 5.00  | 3.375 | 3.894  | 1.103  | 3.00 | 3.00  | 4.00  | 4.00  | 5.00  |
| 0.15 | 3.194 | 0.3222067 | 0.0286625 | 0.60 | 1.20 | 2.673  | 0.640  | 2.00 | 2.00  | 3.00  | 3.00  | 3.00  | 3.375 | 2.766  | 0.660  | 2.00 | 2.00  | 3.00  | 3.00  | 4.00  |
| 0.15 | 3.194 | 0.3222067 | 0.0286625 | 0.50 | 1.20 | 2.120  | 0.339  | 2.00 | 2.00  | 2.00  | 2.00  | 3.00  | 3.375 | 2.168  | 0.384  | 2.00 | 2.00  | 2.00  | 2.00  | 3.00  |
| 0.15 | 3.194 | 0.3222067 | 0.0286625 | 1.10 | 1.30 | 21.430 | 14.989 | 7.00 | 11.00 | 17.00 | 28.00 | 41.00 | 3.375 | 23.954 | 17.292 | 8.00 | 12.00 | 19.00 | 31.00 | 46.00 |
| 0.15 | 3.194 | 0.3222067 | 0.0286625 | 1.20 | 1.30 | 7.213  | 3.223  | 4.00 | 5.00  | 7.00  | 9.00  | 11.00 | 3.375 | 7.610  | 3.450  | 4.00 | 5.00  | 7.00  | 9.00  | 12.00 |
| 0.15 | 3.194 | 0.3222067 | 0.0286625 | 1.30 | 1.30 | 4.328  | 1.482  | 3.00 | 3.00  | 4.00  | 5.00  | 6.00  | 3.375 | 4.526  | 1.537  | 3.00 | 3.00  | 4.00  | 5.00  | 7.00  |
| 0.15 | 3.194 | 0.3222067 | 0.0286625 | 1.40 | 1.30 | 3.204  | 0.931  | 2.00 | 3.00  | 3.00  | 4.00  | 4.00  | 3.375 | 3.308  | 0.944  | 2.00 | 3.00  | 3.00  | 4.00  | 4.00  |
| 0.15 | 3.194 | 0.3222067 | 0.0286625 | 0.90 | 1.30 | 20.673 | 14.050 | 7.00 | 11.00 | 17.00 | 26.00 | 39.00 | 3.375 | 23.051 | 15.949 | 8.00 | 12.00 | 19.00 | 30.00 | 44.00 |
| 0.15 | 3.194 | 0.3222067 | 0.0286625 | 0.80 | 1.30 | 6.434  | 2.521  | 4.00 | 5.00  | 6.00  | 8.00  | 10.00 | 3.375 | 6.734  | 2.654  | 4.00 | 5.00  | 6.00  | 8.00  | 10.00 |
| 0.15 | 3.194 | 0.3222067 | 0.0286625 | 0.70 | 1.30 | 3.724  | 1.042  | 3.00 | 3.00  | 4.00  | 4.00  | 5.00  | 3.375 | 3.879  | 1.072  | 3.00 | 3.00  | 4.00  | 4.00  | 5.00  |
| 0.15 | 3.194 | 0.3222067 | 0.0286625 | 0.60 | 1.30 | 2.653  | 0.635  | 2.00 | 2.00  | 3.00  | 3.00  | 3.00  | 3.375 | 2.772  | 0.653  | 2.00 | 2.00  | 3.00  | 3.00  | 4.00  |
| 0.15 | 3.194 | 0.3222067 | 0.0286625 | 0.50 | 1.30 | 2.125  | 0.344  | 2.00 | 2.00  | 2.00  | 2.00  | 3.00  | 3.375 | 2.170  | 0.386  | 2.00 | 2.00  | 2.00  | 2.00  | 3.00  |
| 0.15 | 3.194 | 0.3222067 | 0.0286625 | 1.10 | 1.40 | 21.107 | 14.760 | 7.00 | 11.00 | 17.00 | 27.00 | 40.00 | 3.375 | 23.697 | 16.968 | 8.00 | 12.00 | 19.00 | 31.00 | 46.00 |
| 0.15 | 3.194 | 0.3222067 | 0.0286625 | 1.20 | 1.40 | 7.243  | 3.243  | 4.00 | 5.00  | 7.00  | 9.00  | 11.00 | 3.375 | 7.609  | 3.441  | 4.00 | 5.00  | 7.00  | 9.00  | 12.00 |
| 0.15 | 3.194 | 0.3222067 | 0.0286625 | 1.30 | 1.40 | 4.362  | 1.485  | 3.00 | 3.00  | 4.00  | 5.00  | 6.00  | 3.375 | 4.535  | 1.515  | 3.00 | 3.00  | 4.00  | 5.00  | 6.00  |
| 0.15 | 3.194 | 0.3222067 | 0.0286625 | 1.40 | 1.40 | 3.192  | 0.913  | 2.00 | 3.00  | 3.00  | 4.00  | 4.00  | 3.375 | 3.311  | 0.943  | 2.00 | 3.00  | 3.00  | 4.00  | 4.00  |
| 0.15 | 3.194 | 0.3222067 | 0.0286625 | 0.90 | 1.40 | 20.364 | 13.696 | 7.00 | 11.00 | 16.00 | 26.00 | 38.00 | 3.375 | 22.719 | 15.784 | 8.00 | 12.00 | 18.00 | 29.00 | 43.00 |
| 0.15 | 3.194 | 0.3222067 | 0.0286625 | 0.80 | 1.40 | 6.419  | 2.550  | 4.00 | 5.00  | 6.00  | 8.00  | 10.00 | 3.375 | 6.752  | 2.661  | 4.00 | 5.00  | 6.00  | 8.00  | 10.00 |
| 0.15 | 3.194 | 0.3222067 | 0.0286625 | 0.70 | 1.40 | 3.727  | 1.050  | 3.00 | 3.00  | 4.00  | 4.00  | 5.00  | 3.375 | 3.886  | 1.079  | 3.00 | 3.00  | 4.00  | 4.00  | 5.00  |
| 0.15 | 3.194 | 0.3222067 | 0.0286625 | 0.60 | 1.40 | 2.666  | 0.638  | 2.00 | 2.00  | 3.00  | 3.00  | 3.00  | 3.375 | 2.759  | 0.657  | 2.00 | 2.00  | 3.00  | 3.00  | 4.00  |
| 0.15 | 3.194 | 0.3222067 | 0.0286625 | 0.50 | 1.40 | 2.119  | 0.339  | 2.00 | 2.00  | 2.00  | 2.00  | 3.00  | 3.375 | 2.161  | 0.376  | 2.00 | 2.00  | 2.00  | 2.00  | 3.00  |
| 0.15 | 3.194 | 0.3222067 | 0.0286625 | 1.10 | 0.90 | 22.184 | 15.861 | 7.00 | 11.00 | 18.00 | 29.00 | 43.00 | 3.375 | 24.797 | 18.425 | 8.00 | 12.00 | 20.00 | 32.00 | 48.00 |
| 0.15 | 3.194 | 0.3222067 | 0.0286625 | 1.20 | 0.90 | 7.219  | 3.237  | 4.00 | 5.00  | 7.00  | 9.00  | 12.00 | 3.375 | 7.664  | 3.452  | 4.00 | 5.00  | 7.00  | 9.00  | 12.00 |
| 0.15 | 3.194 | 0.3222067 | 0.0286625 | 1.30 | 0.90 | 4.370  | 1.490  | 3.00 | 3.00  | 4.00  | 5.00  | 6.00  | 3.375 | 4.549  | 1.540  | 3.00 | 3.00  | 4.00  | 5.00  | 7.00  |
| 0.15 | 3.194 | 0.3222067 | 0.0286625 | 1.40 | 0.90 | 3.216  | 0.932  | 2.00 | 3.00  | 3.00  | 4.00  | 4.00  | 3.375 | 3.317  | 0.944  | 2.00 | 3.00  | 3.00  | 4.00  | 5.00  |
| 0.15 | 3.194 | 0.3222067 | 0.0286625 | 0.90 | 0.90 | 21.309 | 14.612 | 8.00 | 11.00 | 17.00 | 27.00 | 40.00 | 3.375 | 23.741 | 16.443 | 8.00 | 12.00 | 19.00 | 30.00 | 45.00 |
| 0.15 | 3.194 | 0.3222067 | 0.0286625 | 0.80 | 0.90 | 6.450  | 2.530  | 4.00 | 5.00  | 6.00  | 8.00  | 10.00 | 3.375 | 6.769  | 2.683  | 4.00 | 5.00  | 6.00  | 8.00  | 10.00 |
| 0.15 | 3.194 | 0.3222067 | 0.0286625 | 0.70 | 0.90 | 3.738  | 1.054  | 3.00 | 3.00  | 4.00  | 4.00  | 5.00  | 3.375 | 3.871  | 1.064  | 3.00 | 3.00  | 4.00  | 4.00  | 5.00  |
| 0.15 | 3.194 | 0.3222067 | 0.0286625 | 0.60 | 0.90 | 2.664  | 0.633  | 2.00 | 2.00  | 3.00  | 3.00  | 3.00  | 3.375 | 2.755  | 0.646  | 2.00 | 2.00  | 3.00  | 3.00  | 4.00  |
| 0.15 | 3.194 | 0.3222067 | 0.0286625 | 0.50 | 0.90 | 2.128  | 0.351  | 2.00 | 2.00  | 2.00  | 2.00  | 3.00  | 3.375 | 2.165  | 0.378  | 2.00 | 2.00  | 2.00  | 2.00  | 3.00  |
| 0.15 | 3.194 | 0.3222067 | 0.0286625 | 1.10 | 0.80 | 22.744 | 16.446 | 7.00 | 11.00 | 18.00 | 29.00 | 44.00 | 3.375 | 24.793 | 17.974 | 8.00 | 12.00 | 20.00 | 32.00 | 48.00 |
| 0.15 | 3.194 | 0.3222067 | 0.0286625 | 1.20 | 0.80 | 7.207  | 3.228  | 4.00 | 5.00  | 7.00  | 9.00  | 11.00 | 3.375 | 7.605  | 3.452  | 4.00 | 5.00  | 7.00  | 9.00  | 12.00 |
| 0.15 | 3.194 | 0.3222067 | 0.0286625 | 1.30 | 0.80 | 4.347  | 1.475  | 3.00 | 3.00  | 4.00  | 5.00  | 6.00  | 3.375 | 4.533  | 1.543  | 3.00 | 3.00  | 4.00  | 5.00  | 7.00  |
| 0.15 | 3.194 | 0.3222067 | 0.0286625 | 1.40 | 0.80 | 3.210  | 0.918  | 2.00 | 3.00  | 3.00  | 4.00  | 4.00  | 3.375 | 3.312  | 0.949  | 2.00 | 3.00  | 3.00  | 4.00  | 5.00  |
| 0.15 | 3.194 | 0.3222067 | 0.0286625 | 0.90 | 0.80 | 21.460 | 14.732 | 7.00 | 11.00 | 17.00 | 28.00 | 41.00 | 3.375 | 23.634 | 17.046 | 8.00 | 12.00 | 19.00 | 30.00 | 45.00 |
| 0.15 | 3.194 | 0.3222067 | 0.0286625 | 0.80 | 0.80 | 6.405  | 2.497  | 4.00 | 5.00  | 6.00  | 8.00  | 10.00 | 3.375 | 6.731  | 2.663  | 4.00 | 5.00  | 6.00  | 8.00  | 10.00 |
| 0.15 | 3.194 | 0.3222067 | 0.0286625 | 0.70 | 0.80 | 3.747  | 1.056  | 3.00 | 3.00  | 4.00  | 4.00  | 5.00  | 3.375 | 3.888  | 1.090  | 3.00 | 3.00  | 4.00  | 4.00  | 5.00  |
| 0.15 | 3.194 | 0.3222067 | 0.0286625 | 0.60 | 0.80 | 2.652  | 0.635  | 2.00 | 2.00  | 3.00  | 3.00  | 3.00  | 3.375 | 2.756  | 0.654  | 2.00 | 2.00  | 3.00  | 3.00  | 4.00  |
| 0.15 | 3.194 | 0.3222067 | 0.0286625 | 0.50 | 0.80 | 2.122  | 0.338  | 2.00 | 2.00  | 2.00  | 2.00  | 3.00  | 3.375 | 2.165  | 0.378  | 2.00 | 2.00  | 2.00  | 2.00  | 3.00  |
| 0.15 | 3.194 | 0.3222067 | 0.0286625 | 1.10 | 0.70 | 22.643 | 16.182 | 7.00 | 11.00 | 18.00 | 29.00 | 44.00 | 3.375 | 24.869 | 18.055 | 8.00 | 12.00 | 20.00 | 32.00 | 48.00 |
| 0.15 | 3.194 | 0.3222067 | 0.0286625 | 1.20 | 0.70 | 7.218  | 3.219  | 4.00 | 5.00  | 7.00  | 9.00  | 11.00 | 3.375 | 7.585  | 3.456  | 4.00 | 5.00  | 7.00  | 9.00  | 12.00 |
| 0.15 | 3.194 | 0.3222067 | 0.0286625 | 1.30 | 0.70 | 4.346  | 1.466  | 3.00 | 3.00  | 4.00  | 5.00  | 6.00  | 3.375 | 4.545  | 1.547  | 3.00 | 3.00  | 4.00  | 5.00  | 7.00  |
| 0.15 | 3.194 | 0.3222067 | 0.0286625 | 1.40 | 0.70 | 3.195  | 0.918  | 2.00 | 3.00  | 3.00  | 4.00  | 4.00  | 3.375 | 3.292  | 0.938  | 2.00 | 3.00  | 3.00  | 4.00  | 4.00  |
| 0.15 | 3.194 | 0.3222067 | 0.0286625 | 0.90 | 0.70 | 21.234 | 14.516 | 8.00 | 11.00 | 17.00 | 27.00 | 40.00 | 3.375 | 24.056 | 16.941 | 8.00 | 12.00 | 19.00 | 31.00 | 46.00 |
| 0.15 | 3.194 | 0.3222067 | 0.0286625 | 0.80 | 0.70 | 6.427  | 2.525  | 4.00 | 5.00  | 6.00  | 8.00  | 10.00 | 3.375 | 6.735  | 2.648  | 4.00 | 5.00  | 6.00  | 8.00  | 10.00 |
| 0.15 | 3.194 | 0.3222067 | 0.0286625 | 0.70 | 0.70 | 3.739  | 1.047  | 3.00 | 3.00  | 4.00  | 4.00  | 5.00  | 3.375 | 3.888  | 1.110  | 3.00 | 3.00  | 4.00  | 4.00  | 5.00  |
| 0.15 | 3.194 | 0.3222067 | 0.0286625 | 0.60 | 0.70 | 2.660  | 0.631  | 2.00 | 2.00  | 3.00  | 3.00  | 3.00  | 3.375 | 2.763  | 0.645  | 2.00 | 2.00  | 3.00  | 3.00  | 4.00  |
| 0.15 | 3.194 | 0.3222067 | 0.0286625 | 0.50 | 0.70 | 2.128  | 0.347  | 2.00 | 2.00  | 2.00  | 2.00  | 3.00  | 3.375 | 2.156  | 0.372  | 2.00 | 2.00  | 2.00  | 2.00  | 3.00  |
| 0.15 | 3.194 | 0.3222067 | 0.0286625 | 1.10 | 0.60 | 22.726 | 16.393 | 7.00 | 11.00 | 18.00 | 29.00 | 44.00 | 3.375 | 25.038 | 18.286 | 8.00 | 12.00 | 20.00 | 32.00 |       |

|                              |       |           |           |      |      |        |        |       |       |       |       |       |                              |        |        |       |       |       |       |       |  |
|------------------------------|-------|-----------|-----------|------|------|--------|--------|-------|-------|-------|-------|-------|------------------------------|--------|--------|-------|-------|-------|-------|-------|--|
| 0.15                         | 3.194 | 0.3222067 | 0.0286625 | 0.80 | 0.60 | 6.423  | 2.535  | 4.00  | 5.00  | 6.00  | 8.00  | 10.00 | 3.375                        | 6.804  | 2.703  | 4.00  | 5.00  | 6.00  | 8.00  | 10.00 |  |
| 0.15                         | 3.194 | 0.3222067 | 0.0286625 | 0.70 | 0.60 | 3.750  | 1.062  | 3.00  | 3.00  | 4.00  | 4.00  | 5.00  | 3.375                        | 3.899  | 1.093  | 3.00  | 3.00  | 4.00  | 4.00  | 5.00  |  |
| 0.15                         | 3.194 | 0.3222067 | 0.0286625 | 0.60 | 0.60 | 2.672  | 0.632  | 2.00  | 2.00  | 3.00  | 3.00  | 3.00  | 3.375                        | 2.757  | 0.652  | 2.00  | 2.00  | 3.00  | 3.00  | 4.00  |  |
| 0.15                         | 3.194 | 0.3222067 | 0.0286625 | 0.50 | 0.60 | 2.119  | 0.340  | 2.00  | 2.00  | 2.00  | 2.00  | 3.00  | 3.375                        | 2.172  | 0.386  | 2.00  | 2.00  | 2.00  | 2.00  | 3.00  |  |
| 0.15                         | 3.194 | 0.3222067 | 0.0286625 | 1.10 | 0.50 | 22.985 | 16.699 | 7.00  | 11.00 | 18.00 | 30.00 | 45.00 | 3.375                        | 25.204 | 18.839 | 8.00  | 12.00 | 20.00 | 32.00 | 49.00 |  |
| 0.15                         | 3.194 | 0.3222067 | 0.0286625 | 1.20 | 0.50 | 7.228  | 3.224  | 4.00  | 5.00  | 7.00  | 9.00  | 11.00 | 3.375                        | 7.696  | 3.480  | 4.00  | 5.00  | 7.00  | 9.00  | 12.00 |  |
| 0.15                         | 3.194 | 0.3222067 | 0.0286625 | 1.30 | 0.50 | 4.346  | 1.488  | 3.00  | 3.00  | 4.00  | 5.00  | 6.00  | 3.375                        | 4.537  | 1.544  | 3.00  | 3.00  | 4.00  | 5.00  | 7.00  |  |
| 0.15                         | 3.194 | 0.3222067 | 0.0286625 | 1.40 | 0.50 | 3.204  | 0.910  | 2.00  | 3.00  | 3.00  | 4.00  | 4.00  | 3.375                        | 3.317  | 0.955  | 2.00  | 3.00  | 3.00  | 4.00  | 5.00  |  |
| 0.15                         | 3.194 | 0.3222067 | 0.0286625 | 0.90 | 0.50 | 21.659 | 14.916 | 8.00  | 11.00 | 18.00 | 28.00 | 41.00 | 3.375                        | 23.839 | 16.722 | 8.00  | 12.00 | 19.00 | 31.00 | 46.00 |  |
| 0.15                         | 3.194 | 0.3222067 | 0.0286625 | 0.80 | 0.50 | 6.436  | 2.557  | 4.00  | 5.00  | 6.00  | 8.00  | 10.00 | 3.375                        | 6.774  | 2.663  | 4.00  | 5.00  | 6.00  | 8.00  | 10.00 |  |
| 0.15                         | 3.194 | 0.3222067 | 0.0286625 | 0.70 | 0.50 | 3.757  | 1.056  | 3.00  | 3.00  | 4.00  | 4.00  | 5.00  | 3.375                        | 3.886  | 1.084  | 3.00  | 3.00  | 4.00  | 4.00  | 5.00  |  |
| 0.15                         | 3.194 | 0.3222067 | 0.0286625 | 0.60 | 0.50 | 2.658  | 0.636  | 2.00  | 2.00  | 3.00  | 3.00  | 3.00  | 3.375                        | 2.770  | 0.644  | 2.00  | 2.00  | 3.00  | 3.00  | 4.00  |  |
| 0.15                         | 3.194 | 0.3222067 | 0.0286625 | 0.50 | 0.50 | 2.126  | 0.353  | 2.00  | 2.00  | 2.00  | 2.00  | 3.00  | 3.375                        | 2.167  | 0.382  | 2.00  | 2.00  | 2.00  | 2.00  | 3.00  |  |
| <b>ARL<sub>0</sub> = 370</b> |       |           |           |      |      |        |        |       |       |       |       |       | <b>ARL<sub>0</sub> = 500</b> |        |        |       |       |       |       |       |  |
| <b>Case 2</b>                |       |           |           |      |      |        |        |       |       |       |       |       |                              |        |        |       |       |       |       |       |  |
| <b><math>\phi=148</math></b> |       |           |           |      |      |        |        |       |       |       |       |       |                              |        |        |       |       |       |       |       |  |
| 0.05                         | 2.701 | 0.1807278 | 0.0092167 | 1.10 | 1.10 | 32.486 | 19.405 | 13.00 | 19.00 | 28.00 | 41.00 | 58.00 | 2.897                        | 35.441 | 21.157 | 14.00 | 20.00 | 30.00 | 45.00 | 64.00 |  |
| 0.05                         | 2.701 | 0.1807278 | 0.0092167 | 1.20 | 1.10 | 13.076 | 5.116  | 7.00  | 9.00  | 12.00 | 16.00 | 20.00 | 2.897                        | 13.824 | 5.440  | 8.00  | 10.00 | 13.00 | 17.00 | 21.00 |  |
| 0.05                         | 2.701 | 0.1807278 | 0.0092167 | 1.30 | 1.10 | 8.282  | 2.637  | 5.00  | 6.00  | 8.00  | 10.00 | 12.00 | 2.897                        | 8.676  | 2.685  | 6.00  | 7.00  | 8.00  | 10.00 | 12.00 |  |
| 0.05                         | 2.701 | 0.1807278 | 0.0092167 | 1.40 | 1.10 | 6.122  | 1.620  | 4.00  | 5.00  | 6.00  | 7.00  | 8.00  | 2.897                        | 6.399  | 1.672  | 4.00  | 5.00  | 6.00  | 7.00  | 9.00  |  |
| 0.05                         | 2.701 | 0.1807278 | 0.0092167 | 0.90 | 1.10 | 30.926 | 17.515 | 14.00 | 19.00 | 27.00 | 39.00 | 54.00 | 2.897                        | 33.562 | 19.076 | 15.00 | 20.00 | 29.00 | 42.00 | 59.00 |  |
| 0.05                         | 2.701 | 0.1807278 | 0.0092167 | 0.80 | 1.10 | 11.723 | 4.080  | 7.00  | 9.00  | 11.00 | 14.00 | 17.00 | 2.897                        | 12.349 | 4.247  | 8.00  | 9.00  | 12.00 | 15.00 | 18.00 |  |
| 0.05                         | 2.701 | 0.1807278 | 0.0092167 | 0.70 | 1.10 | 7.121  | 1.813  | 5.00  | 6.00  | 7.00  | 8.00  | 10.00 | 2.897                        | 7.452  | 1.890  | 5.00  | 6.00  | 7.00  | 8.00  | 10.00 |  |
| 0.05                         | 2.701 | 0.1807278 | 0.0092167 | 0.60 | 1.10 | 5.134  | 1.065  | 4.00  | 4.00  | 5.00  | 6.00  | 7.00  | 2.897                        | 5.350  | 1.086  | 4.00  | 5.00  | 5.00  | 6.00  | 7.00  |  |
| 0.05                         | 2.701 | 0.1807278 | 0.0092167 | 0.50 | 1.10 | 3.993  | 0.702  | 3.00  | 4.00  | 4.00  | 4.00  | 5.00  | 2.897                        | 4.187  | 0.725  | 3.00  | 4.00  | 4.00  | 5.00  | 5.00  |  |
| 0.05                         | 2.701 | 0.1807278 | 0.0092167 | 1.10 | 1.20 | 32.389 | 19.224 | 13.00 | 19.00 | 28.00 | 41.00 | 57.00 | 2.897                        | 35.313 | 21.346 | 14.00 | 20.00 | 30.00 | 45.00 | 63.00 |  |
| 0.05                         | 2.701 | 0.1807278 | 0.0092167 | 1.20 | 1.20 | 13.051 | 5.218  | 7.00  | 9.00  | 12.00 | 16.00 | 20.00 | 2.897                        | 13.848 | 5.442  | 8.00  | 10.00 | 13.00 | 17.00 | 21.00 |  |
| 0.05                         | 2.701 | 0.1807278 | 0.0092167 | 1.30 | 1.20 | 8.286  | 2.606  | 5.00  | 6.00  | 8.00  | 10.00 | 12.00 | 2.897                        | 8.677  | 2.654  | 6.00  | 7.00  | 8.00  | 10.00 | 12.00 |  |
| 0.05                         | 2.701 | 0.1807278 | 0.0092167 | 1.40 | 1.20 | 6.116  | 1.628  | 4.00  | 5.00  | 6.00  | 7.00  | 8.00  | 2.897                        | 6.407  | 1.656  | 4.00  | 5.00  | 6.00  | 7.00  | 9.00  |  |
| 0.05                         | 2.701 | 0.1807278 | 0.0092167 | 0.90 | 1.20 | 30.536 | 16.924 | 14.00 | 19.00 | 27.00 | 38.00 | 52.00 | 2.897                        | 33.354 | 18.873 | 15.00 | 20.00 | 29.00 | 42.00 | 58.00 |  |
| 0.05                         | 2.701 | 0.1807278 | 0.0092167 | 0.80 | 1.20 | 11.778 | 4.130  | 7.00  | 9.00  | 11.00 | 14.00 | 17.00 | 2.897                        | 12.412 | 4.224  | 8.00  | 9.00  | 12.00 | 15.00 | 18.00 |  |
| 0.05                         | 2.701 | 0.1807278 | 0.0092167 | 0.70 | 1.20 | 7.139  | 1.836  | 5.00  | 6.00  | 7.00  | 8.00  | 10.00 | 2.897                        | 7.477  | 1.902  | 5.00  | 6.00  | 7.00  | 9.00  | 10.00 |  |
| 0.05                         | 2.701 | 0.1807278 | 0.0092167 | 0.60 | 1.20 | 5.128  | 1.062  | 4.00  | 4.00  | 5.00  | 6.00  | 6.00  | 2.897                        | 5.345  | 1.096  | 4.00  | 5.00  | 5.00  | 6.00  | 7.00  |  |
| 0.05                         | 2.701 | 0.1807278 | 0.0092167 | 0.50 | 1.20 | 3.995  | 0.716  | 3.00  | 4.00  | 4.00  | 4.00  | 5.00  | 2.897                        | 4.184  | 0.719  | 3.00  | 4.00  | 4.00  | 5.00  | 5.00  |  |
| 0.05                         | 2.701 | 0.1807278 | 0.0092167 | 1.10 | 1.30 | 31.661 | 18.660 | 13.00 | 18.00 | 27.00 | 40.00 | 56.00 | 2.897                        | 33.985 | 19.832 | 14.00 | 20.00 | 29.00 | 43.00 | 60.00 |  |
| 0.05                         | 2.701 | 0.1807278 | 0.0092167 | 1.20 | 1.30 | 13.063 | 5.042  | 7.90  | 9.00  | 12.00 | 16.00 | 20.00 | 2.897                        | 13.819 | 5.549  | 8.00  | 10.00 | 13.00 | 17.00 | 21.00 |  |
| 0.05                         | 2.701 | 0.1807278 | 0.0092167 | 1.30 | 1.30 | 8.231  | 2.555  | 5.00  | 6.00  | 8.00  | 10.00 | 12.00 | 2.897                        | 8.610  | 2.671  | 6.00  | 7.00  | 8.00  | 10.00 | 12.00 |  |
| 0.05                         | 2.701 | 0.1807278 | 0.0092167 | 1.40 | 1.30 | 6.123  | 1.632  | 4.00  | 5.00  | 6.00  | 7.00  | 8.00  | 2.897                        | 6.410  | 1.708  | 4.00  | 5.00  | 6.00  | 7.00  | 9.00  |  |
| 0.05                         | 2.701 | 0.1807278 | 0.0092167 | 0.90 | 1.30 | 29.719 | 16.321 | 13.00 | 18.00 | 26.00 | 37.00 | 51.00 | 2.897                        | 32.282 | 17.661 | 14.00 | 20.00 | 28.00 | 40.00 | 56.00 |  |
| 0.05                         | 2.701 | 0.1807278 | 0.0092167 | 0.80 | 1.30 | 11.776 | 4.093  | 7.00  | 9.00  | 11.00 | 14.00 | 17.00 | 2.897                        | 12.372 | 4.239  | 8.00  | 9.00  | 12.00 | 15.00 | 18.00 |  |
| 0.05                         | 2.701 | 0.1807278 | 0.0092167 | 0.70 | 1.30 | 7.135  | 1.828  | 5.00  | 6.00  | 7.00  | 8.00  | 10.00 | 2.897                        | 7.460  | 1.894  | 5.00  | 6.00  | 7.00  | 8.00  | 10.00 |  |
| 0.05                         | 2.701 | 0.1807278 | 0.0092167 | 0.60 | 1.30 | 5.135  | 1.057  | 4.00  | 4.00  | 5.00  | 6.00  | 6.00  | 2.897                        | 5.347  | 1.096  | 4.00  | 5.00  | 5.00  | 6.00  | 7.00  |  |
| 0.05                         | 2.701 | 0.1807278 | 0.0092167 | 0.50 | 1.30 | 3.995  | 0.707  | 3.00  | 4.00  | 4.00  | 4.00  | 5.00  | 2.897                        | 4.175  | 0.719  | 3.00  | 4.00  | 4.00  | 5.00  | 5.00  |  |
| 0.05                         | 2.701 | 0.1807278 | 0.0092167 | 1.10 | 1.40 | 30.543 | 17.654 | 13.00 | 18.00 | 26.00 | 38.00 | 53.00 | 2.897                        | 33.337 | 19.292 | 14.00 | 20.00 | 29.00 | 42.00 | 58.00 |  |
| 0.05                         | 2.701 | 0.1807278 | 0.0092167 | 1.20 | 1.40 | 13.022 | 5.099  | 7.00  | 9.00  | 12.00 | 16.00 | 20.00 | 2.897                        | 13.775 | 5.364  | 8.00  | 10.00 | 13.00 | 17.00 | 21.00 |  |
| 0.05                         | 2.701 | 0.1807278 | 0.0092167 | 1.30 | 1.40 | 8.273  | 2.593  | 5.00  | 6.00  | 8.00  | 10.00 | 12.00 | 2.897                        | 8.620  | 2.623  | 6.00  | 7.00  | 8.00  | 10.00 | 12.00 |  |
| 0.05                         | 2.701 | 0.1807278 | 0.0092167 | 1.40 | 1.40 | 6.127  | 1.618  | 4.00  | 5.00  | 6.00  | 7.00  | 8.00  | 2.897                        | 6.409  | 1.696  | 4.00  | 5.00  | 6.00  | 7.00  | 9.00  |  |
| 0.05                         | 2.701 | 0.1807278 | 0.0092167 | 0.90 | 1.40 | 28.845 | 15.537 | 13.00 | 18.00 | 25.00 | 36.00 | 50.00 | 2.897                        | 31.881 | 17.394 | 15.00 | 20.00 | 28.00 | 40.00 | 54.00 |  |
| 0.05                         | 2.701 | 0.1807278 | 0.0092167 | 0.80 | 1.40 | 11.761 | 4.022  | 7.00  | 9.00  | 11.00 | 14.00 | 17.00 | 2.897                        | 12.343 | 4.182  | 8.00  | 9.00  | 12.00 | 15.00 | 18.00 |  |
| 0.05                         | 2.701 | 0.1807278 | 0.0092167 | 0.70 | 1.40 | 7.163  | 1.858  | 5.00  | 6.00  | 7.00  | 8.00  | 10.00 | 2.897                        | 7.440  | 1.880  | 5.00  | 6.00  | 7.00  | 9.00  | 10.00 |  |
| 0.05                         | 2.701 | 0.1807278 | 0.0092167 | 0.60 | 1.40 | 5.144  | 1.077  | 4.00  | 4.00  | 5.00  | 6.00  | 7.00  | 2.897                        | 5.340  | 1.091  | 4.00  | 5.00  | 5.00  | 6.00  | 7.00  |  |
| 0.05                         | 2.701 | 0.1807278 | 0.0092167 | 0.50 | 1.40 | 4.011  | 0.711  | 3.00  | 4.00  | 4.00  | 4.00  | 5.00  | 2.897                        | 4.175  | 0.724  | 3.00  | 4.00  | 4.00  | 5.00  | 5.00  |  |
| 0.05                         | 2.701 | 0.1807278 | 0.0092167 | 1.10 | 0.90 | 32.996 | 19.608 | 14.00 | 19.00 | 28.00 | 42.00 | 58.00 | 2.897                        | 36.078 | 21.806 | 15.00 | 21.00 | 31.00 | 46.00 | 65.00 |  |
| 0.05                         | 2.701 | 0.1807278 | 0.0092167 | 1.20 | 0.90 | 13.049 | 5.112  | 7.00  | 9.00  | 12.00 | 16.00 | 20.00 | 2.897                        | 13.915 | 5.430  | 8.00  | 10.00 | 13.00 | 17.00 | 21.00 |  |
| 0.05                         | 2.701 | 0.1807278 | 0.0092167 | 1.30 | 0.90 | 8.247  | 2.564  | 5.00  | 6.00  | 8.00  | 10.00 | 12.00 | 2.897                        | 8.631  | 2.621  | 6.00  | 7.00  | 8.00  | 10.00 | 12.00 |  |
| 0.05                         | 2.701 | 0.1807278 | 0.0092167 | 1.40 | 0.90 | 6.107  | 1.598  | 4.00  | 5.00  | 6.00  | 7.00  | 8.00  | 2.897                        | 6.410  | 1.689  | 4.00  | 5.00  | 6.00  | 7.00  | 9.00  |  |
| 0.05                         | 2.701 | 0.1807278 | 0.0092167 | 0.90 | 0.90 | 31.586 | 17.873 | 14.00 | 19.00 | 27.00 | 40.00 | 55.00 | 2.897                        | 34.146 | 19.369 | 15.00 | 20.00 | 29.00 | 43.00 | 59.00 |  |
| 0.05                         | 2.701 | 0.1807278 | 0.0092167 | 0.80 | 0.90 | 11.758 | 4.088  | 7.00  | 9.00  | 11.00 | 14.00 | 17.00 | 2.897                        | 12.416 | 4.247  | 8.00  | 9.00  | 12.00 | 15.00 | 18.00 |  |
| 0.05                         | 2.701 | 0.1807278 | 0.0092167 | 0.70 | 0.90 | 7.148  | 1.827  | 5.00  | 6.00  | 7.00  | 8.00  | 10.00 | 2.897                        | 7.471  | 1.903  | 5.00  | 6.00  | 7.00  | 9.00  | 10.00 |  |
| 0.05                         | 2.701 | 0.1807278 | 0.0092167 | 0.60 | 0.90 | 5.147  | 1.070  | 4.00  | 4.00  |       |       |       |                              |        |        |       |       |       |       |       |  |

|      |       |           |           |      |      |         |         |       |        |        |        |        |       |         |         |       |        |        |        |         |
|------|-------|-----------|-----------|------|------|---------|---------|-------|--------|--------|--------|--------|-------|---------|---------|-------|--------|--------|--------|---------|
| 0.05 | 2.701 | 0.1807278 | 0.0092167 | 1.20 | 0.80 | 13.172  | 5.221   | 8.00  | 9.00   | 12.00  | 16.00  | 20.00  | 2.897 | 13.868  | 5.430   | 8.00  | 10.00  | 13.00  | 17.00  | 21.00   |
| 0.05 | 2.701 | 0.1807278 | 0.0092167 | 1.30 | 0.80 | 8.269   | 2.615   | 5.00  | 6.00   | 8.00   | 10.00  | 12.00  | 2.897 | 8.650   | 2.651   | 6.00  | 7.00   | 8.00   | 10.00  | 12.00   |
| 0.05 | 2.701 | 0.1807278 | 0.0092167 | 1.40 | 0.80 | 6.153   | 1.638   | 4.00  | 5.00   | 6.00   | 7.00   | 8.00   | 2.897 | 6.415   | 1.687   | 4.00  | 5.00   | 6.00   | 7.00   | 9.00    |
| 0.05 | 2.701 | 0.1807278 | 0.0092167 | 0.90 | 0.80 | 31.319  | 17.513  | 14.00 | 19.00  | 27.00  | 39.00  | 54.00  | 2.897 | 33.546  | 18.571  | 15.00 | 20.00  | 29.00  | 42.00  | 58.00   |
| 0.05 | 2.701 | 0.1807278 | 0.0092167 | 0.80 | 0.80 | 11.865  | 4.088   | 7.00  | 9.00   | 11.00  | 14.00  | 17.00  | 2.897 | 12.422  | 4.248   | 8.00  | 9.00   | 12.00  | 15.00  | 18.00   |
| 0.05 | 2.701 | 0.1807278 | 0.0092167 | 0.70 | 0.80 | 7.184   | 1.847   | 5.00  | 6.00   | 7.00   | 8.00   | 10.00  | 2.897 | 7.503   | 1.910   | 5.00  | 6.00   | 7.00   | 9.00   | 10.00   |
| 0.05 | 2.701 | 0.1807278 | 0.0092167 | 0.60 | 0.80 | 5.119   | 1.042   | 4.00  | 4.00   | 5.00   | 6.00   | 6.00   | 2.897 | 5.344   | 1.084   | 4.00  | 5.00   | 5.00   | 6.00   | 7.00    |
| 0.05 | 2.701 | 0.1807278 | 0.0092167 | 0.50 | 0.80 | 4.009   | 0.710   | 3.00  | 4.00   | 4.00   | 4.00   | 5.00   | 2.897 | 4.167   | 0.727   | 3.00  | 4.00   | 4.00   | 5.00   | 5.00    |
| 0.05 | 2.701 | 0.1807278 | 0.0092167 | 1.10 | 0.70 | 32.409  | 18.637  | 14.00 | 20.00  | 28.00  | 41.00  | 56.00  | 2.897 | 35.301  | 20.753  | 15.00 | 20.00  | 30.00  | 45.00  | 62.00   |
| 0.05 | 2.701 | 0.1807278 | 0.0092167 | 1.20 | 0.70 | 13.125  | 5.197   | 7.00  | 9.00   | 12.00  | 16.00  | 20.00  | 2.897 | 13.936  | 5.457   | 8.00  | 10.00  | 13.00  | 17.00  | 21.00   |
| 0.05 | 2.701 | 0.1807278 | 0.0092167 | 1.30 | 0.70 | 8.240   | 2.564   | 5.00  | 6.00   | 8.00   | 10.00  | 12.00  | 2.897 | 8.629   | 2.656   | 6.00  | 7.00   | 8.00   | 10.00  | 12.00   |
| 0.05 | 2.701 | 0.1807278 | 0.0092167 | 1.40 | 0.70 | 6.130   | 1.618   | 4.00  | 5.00   | 6.00   | 7.00   | 8.00   | 2.897 | 6.386   | 1.676   | 4.00  | 5.00   | 6.00   | 7.00   | 9.00    |
| 0.05 | 2.701 | 0.1807278 | 0.0092167 | 0.90 | 0.70 | 30.688  | 16.914  | 14.00 | 19.00  | 27.00  | 38.00  | 53.00  | 2.897 | 33.430  | 18.492  | 15.00 | 20.00  | 29.00  | 42.00  | 58.00   |
| 0.05 | 2.701 | 0.1807278 | 0.0092167 | 0.80 | 0.70 | 11.796  | 4.087   | 7.00  | 9.00   | 11.00  | 14.00  | 17.00  | 2.897 | 12.484  | 4.249   | 8.00  | 9.00   | 12.00  | 15.00  | 18.00   |
| 0.05 | 2.701 | 0.1807278 | 0.0092167 | 0.70 | 0.70 | 7.148   | 1.834   | 5.00  | 6.00   | 7.00   | 8.00   | 10.00  | 2.897 | 7.530   | 1.902   | 5.00  | 6.00   | 7.00   | 9.00   | 10.00   |
| 0.05 | 2.701 | 0.1807278 | 0.0092167 | 0.60 | 0.70 | 5.131   | 1.058   | 4.00  | 4.00   | 5.00   | 6.00   | 6.00   | 2.897 | 5.351   | 1.088   | 4.00  | 5.00   | 5.00   | 6.00   | 7.00    |
| 0.05 | 2.701 | 0.1807278 | 0.0092167 | 0.50 | 0.70 | 4.014   | 0.713   | 3.00  | 4.00   | 4.00   | 4.00   | 5.00   | 2.897 | 4.174   | 0.732   | 3.00  | 4.00   | 4.00   | 5.00   | 5.00    |
| 0.05 | 2.701 | 0.1807278 | 0.0092167 | 1.10 | 0.60 | 31.410  | 17.724  | 14.00 | 19.00  | 28.00  | 39.00  | 54.00  | 2.897 | 33.878  | 18.868  | 15.00 | 20.00  | 30.00  | 43.00  | 59.00   |
| 0.05 | 2.701 | 0.1807278 | 0.0092167 | 1.20 | 0.60 | 13.108  | 5.071   | 7.00  | 9.00   | 12.00  | 16.00  | 20.00  | 2.897 | 13.863  | 5.390   | 8.00  | 10.00  | 13.00  | 17.00  | 21.00   |
| 0.05 | 2.701 | 0.1807278 | 0.0092167 | 1.30 | 0.60 | 8.253   | 2.578   | 5.00  | 6.00   | 8.00   | 10.00  | 12.00  | 2.897 | 8.650   | 2.632   | 6.00  | 7.00   | 8.00   | 10.00  | 12.00   |
| 0.05 | 2.701 | 0.1807278 | 0.0092167 | 1.40 | 0.60 | 6.136   | 1.623   | 4.00  | 5.00   | 6.00   | 7.00   | 8.00   | 2.897 | 6.392   | 1.698   | 4.00  | 5.00   | 6.00   | 7.00   | 9.00    |
| 0.05 | 2.701 | 0.1807278 | 0.0092167 | 0.90 | 0.60 | 29.364  | 15.339  | 14.00 | 18.00  | 26.00  | 37.00  | 49.00  | 2.897 | 32.325  | 17.177  | 15.00 | 20.00  | 28.00  | 40.00  | 55.00   |
| 0.05 | 2.701 | 0.1807278 | 0.0092167 | 0.80 | 0.60 | 11.853  | 4.168   | 7.00  | 9.00   | 11.00  | 14.00  | 17.00  | 2.897 | 12.345  | 4.207   | 8.00  | 9.00   | 12.00  | 15.00  | 18.00   |
| 0.05 | 2.701 | 0.1807278 | 0.0092167 | 0.70 | 0.60 | 7.164   | 1.859   | 5.00  | 6.00   | 7.00   | 8.00   | 10.00  | 2.897 | 7.460   | 1.889   | 5.00  | 6.00   | 7.00   | 8.00   | 10.00   |
| 0.05 | 2.701 | 0.1807278 | 0.0092167 | 0.60 | 0.60 | 5.129   | 1.065   | 4.00  | 4.00   | 5.00   | 6.00   | 7.00   | 2.897 | 5.349   | 1.081   | 4.00  | 5.00   | 5.00   | 6.00   | 7.00    |
| 0.05 | 2.701 | 0.1807278 | 0.0092167 | 0.50 | 0.60 | 4.017   | 0.716   | 3.00  | 4.00   | 4.00   | 4.00   | 5.00   | 2.897 | 4.173   | 0.719   | 3.00  | 4.00   | 4.00   | 5.00   | 5.00    |
| 0.05 | 2.701 | 0.1807278 | 0.0092167 | 1.10 | 0.50 | 29.053  | 14.850  | 14.00 | 18.00  | 26.00  | 36.00  | 49.00  | 2.897 | 31.797  | 16.581  | 15.00 | 20.00  | 28.00  | 40.00  | 53.00   |
| 0.05 | 2.701 | 0.1807278 | 0.0092167 | 1.20 | 0.50 | 13.053  | 5.151   | 7.00  | 9.00   | 12.00  | 16.00  | 20.00  | 2.897 | 13.866  | 5.344   | 8.00  | 10.00  | 13.00  | 17.00  | 21.00   |
| 0.05 | 2.701 | 0.1807278 | 0.0092167 | 1.30 | 0.50 | 8.270   | 2.590   | 5.00  | 6.00   | 8.00   | 10.00  | 12.00  | 2.897 | 8.703   | 2.701   | 6.00  | 7.00   | 8.00   | 10.00  | 12.00   |
| 0.05 | 2.701 | 0.1807278 | 0.0092167 | 1.40 | 0.50 | 6.148   | 1.635   | 4.00  | 5.00   | 6.00   | 7.00   | 8.00   | 2.897 | 6.396   | 1.701   | 4.00  | 5.00   | 6.00   | 7.00   | 9.00    |
| 0.05 | 2.701 | 0.1807278 | 0.0092167 | 0.90 | 0.50 | 28.155  | 13.851  | 14.00 | 18.00  | 25.00  | 35.00  | 46.00  | 2.897 | 30.637  | 15.418  | 15.00 | 20.00  | 27.00  | 38.00  | 51.00   |
| 0.05 | 2.701 | 0.1807278 | 0.0092167 | 0.80 | 0.50 | 11.807  | 4.108   | 7.00  | 9.00   | 11.00  | 14.00  | 17.00  | 2.897 | 12.414  | 4.207   | 8.00  | 9.00   | 12.00  | 15.00  | 18.00   |
| 0.05 | 2.701 | 0.1807278 | 0.0092167 | 0.70 | 0.50 | 7.145   | 1.833   | 5.00  | 6.00   | 7.00   | 8.00   | 9.00   | 2.897 | 7.473   | 1.894   | 5.00  | 6.00   | 7.00   | 9.00   | 10.00   |
| 0.05 | 2.701 | 0.1807278 | 0.0092167 | 0.60 | 0.50 | 5.133   | 1.052   | 4.00  | 4.00   | 5.00   | 6.00   | 6.00   | 2.897 | 5.351   | 1.076   | 4.00  | 5.00   | 5.00   | 6.00   | 7.00    |
| 0.05 | 2.701 | 0.1807278 | 0.0092167 | 0.50 | 0.50 | 4.009   | 0.711   | 3.00  | 4.00   | 4.00   | 4.00   | 5.00   | 2.897 | 4.155   | 0.714   | 3.00  | 4.00   | 4.00   | 5.00   | 5.00    |
| 0.10 | 3.026 | 0.2588440 | 0.0187933 | 1.00 | 1.00 | 370.310 | 356.600 | 45.00 | 110.00 | 259.00 | 508.25 | 837.00 | 3.216 | 500.482 | 483.140 | 61.00 | 152.00 | 355.00 | 690.25 | 1127.10 |
| 0.10 | 3.026 | 0.2588440 | 0.0187933 | 1.10 | 1.10 | 35.724  | 26.768  | 11.00 | 17.00  | 28.00  | 46.00  | 71.00  | 3.216 | 40.042  | 29.743  | 12.00 | 19.00  | 32.00  | 52.00  | 79.00   |
| 0.10 | 3.026 | 0.2588440 | 0.0187933 | 1.20 | 1.10 | 11.962  | 5.869   | 6.00  | 8.00   | 11.00  | 15.00  | 20.00  | 3.216 | 12.809  | 6.318   | 6.00  | 8.00   | 11.00  | 16.00  | 21.00   |
| 0.10 | 3.026 | 0.2588440 | 0.0187933 | 1.30 | 1.10 | 7.140   | 2.677   | 4.00  | 5.00   | 7.00   | 9.00   | 11.00  | 3.216 | 7.460   | 2.817   | 4.00  | 5.00   | 7.00   | 9.00   | 11.00   |
| 0.10 | 3.026 | 0.2588440 | 0.0187933 | 1.40 | 1.10 | 5.123   | 1.653   | 3.00  | 4.00   | 5.00   | 6.00   | 7.00   | 3.216 | 5.372   | 1.696   | 3.00  | 4.00   | 5.00   | 6.00   | 8.00    |
| 0.10 | 3.026 | 0.2588440 | 0.0187933 | 0.90 | 1.10 | 34.866  | 24.514  | 12.00 | 18.00  | 28.00  | 45.00  | 67.00  | 3.216 | 39.508  | 29.285  | 13.00 | 19.00  | 31.00  | 51.00  | 77.00   |
| 0.10 | 3.026 | 0.2588440 | 0.0187933 | 0.80 | 1.10 | 10.631  | 4.614   | 6.00  | 7.00   | 10.00  | 13.00  | 17.00  | 3.216 | 11.292  | 4.897   | 6.00  | 8.00   | 10.00  | 14.00  | 18.00   |
| 0.10 | 3.026 | 0.2588440 | 0.0187933 | 0.70 | 1.10 | 6.040   | 1.874   | 4.00  | 5.00   | 6.00   | 7.00   | 8.00   | 3.216 | 6.341   | 1.959   | 4.00  | 5.00   | 6.00   | 7.00   | 9.00    |
| 0.10 | 3.026 | 0.2588440 | 0.0187933 | 0.60 | 1.10 | 4.244   | 1.027   | 3.00  | 4.00   | 4.00   | 5.00   | 6.00   | 3.216 | 4.397   | 1.053   | 3.00  | 4.00   | 4.00   | 5.00   | 6.00    |
| 0.10 | 3.026 | 0.2588440 | 0.0187933 | 0.50 | 1.10 | 3.277   | 0.659   | 3.00  | 3.00   | 3.00   | 4.00   | 4.00   | 3.216 | 3.397   | 0.681   | 3.00  | 3.00   | 3.00   | 4.00   | 4.00    |
| 0.10 | 3.026 | 0.2588440 | 0.0187933 | 1.10 | 1.20 | 34.550  | 25.574  | 11.00 | 17.00  | 27.00  | 45.00  | 68.00  | 3.216 | 38.652  | 29.126  | 12.00 | 18.00  | 30.00  | 50.00  | 76.00   |
| 0.10 | 3.026 | 0.2588440 | 0.0187933 | 1.20 | 1.20 | 12.012  | 5.966   | 6.00  | 8.00   | 11.00  | 15.00  | 20.00  | 3.216 | 12.743  | 6.359   | 6.00  | 8.00   | 11.00  | 16.00  | 21.00   |
| 0.10 | 3.026 | 0.2588440 | 0.0187933 | 1.30 | 1.20 | 7.136   | 2.693   | 4.00  | 5.00   | 7.00   | 9.00   | 11.00  | 3.216 | 7.440   | 2.782   | 4.00  | 5.00   | 7.00   | 9.00   | 11.00   |
| 0.10 | 3.026 | 0.2588440 | 0.0187933 | 1.40 | 1.20 | 5.153   | 1.648   | 3.00  | 4.00   | 5.00   | 6.00   | 7.00   | 3.216 | 5.369   | 1.706   | 3.00  | 4.00   | 5.00   | 6.00   | 8.00    |
| 0.10 | 3.026 | 0.2588440 | 0.0187933 | 0.90 | 1.20 | 33.946  | 23.848  | 12.00 | 17.00  | 27.00  | 44.00  | 65.00  | 3.216 | 38.718  | 28.118  | 12.00 | 19.00  | 31.00  | 50.00  | 75.00   |
| 0.10 | 3.026 | 0.2588440 | 0.0187933 | 0.80 | 1.20 | 10.708  | 4.618   | 6.00  | 7.00   | 10.00  | 13.00  | 17.00  | 3.216 | 11.345  | 4.926   | 6.00  | 8.00   | 10.00  | 14.00  | 18.00   |
| 0.10 | 3.026 | 0.2588440 | 0.0187933 | 0.70 | 1.20 | 6.045   | 1.899   | 4.00  | 5.00   | 6.00   | 7.00   | 9.00   | 3.216 | 6.317   | 1.944   | 4.00  | 5.00   | 6.00   | 7.00   | 9.00    |
| 0.10 | 3.026 | 0.2588440 | 0.0187933 | 0.60 | 1.20 | 4.225   | 1.035   | 3.00  | 4.00   | 4.00   | 5.00   | 6.00   | 3.216 | 4.405   | 1.063   | 3.00  | 4.00   | 4.00   | 5.00   | 6.00    |
| 0.10 | 3.026 | 0.2588440 | 0.0187933 | 0.50 | 1.20 | 3.285   | 0.657   | 3.00  | 3.00   | 3.00   | 4.00   | 4.00   | 3.216 | 3.398   | 0.680   | 3.00  | 3.00   | 3.00   | 4.00   | 4.00    |
| 0.10 | 3.026 | 0.2588440 | 0.0187933 | 1.10 | 1.30 | 34.212  | 25.042  | 11.00 | 17.00  | 27.00  | 44.00  | 66.00  | 3.216 | 38.132  | 28.777  | 12.00 | 18.00  | 30.00  | 50.00  | 75.00   |
| 0.10 | 3.026 | 0.2588440 | 0.0187933 | 1.20 | 1.30 | 11.925  | 5.837   | 6.00  | 8.00   | 11.00  | 15.00  | 20.00  | 3.216 | 12.764  | 6.357   | 6.00  | 8.00   | 11.00  | 16.00  | 21.00   |
| 0.10 | 3.026 | 0.2588440 | 0.0187933 | 1.30 | 1.30 | 7.091   | 2.707   | 4.00  | 5.00   | 7.00   | 8.00   | 11.00  | 3.216 | 7.463   | 2.860   | 4.00  | 5.00   | 7.00   | 9.00   | 11.00   |
| 0.10 | 3.026 | 0.2588440 | 0.0187    |      |      |         |         |       |        |        |        |        |       |         |         |       |        |        |        |         |

|      |       |           |           |      |      |         |         |       |        |        |        |        |       |         |         |       |        |        |        |         |
|------|-------|-----------|-----------|------|------|---------|---------|-------|--------|--------|--------|--------|-------|---------|---------|-------|--------|--------|--------|---------|
| 0.10 | 3.026 | 0.2588440 | 0.0187933 | 0.50 | 1.30 | 3.274   | 0.647   | 3.00  | 3.00   | 3.00   | 4.00   | 4.00   | 3.216 | 3.386   | 0.664   | 3.00  | 3.00   | 3.00   | 4.00   | 4.00    |
| 0.10 | 3.026 | 0.2588440 | 0.0187933 | 1.10 | 1.40 | 32.412  | 23.425  | 10.00 | 16.00  | 26.00  | 42.00  | 62.00  | 3.216 | 36.188  | 26.224  | 11.00 | 18.00  | 29.00  | 47.00  | 70.00   |
| 0.10 | 3.026 | 0.2588440 | 0.0187933 | 1.20 | 1.40 | 11.903  | 5.863   | 6.00  | 8.00   | 11.00  | 15.00  | 20.00  | 3.216 | 12.668  | 6.275   | 6.00  | 8.00   | 11.00  | 16.00  | 21.00   |
| 0.10 | 3.026 | 0.2588440 | 0.0187933 | 1.30 | 1.40 | 7.109   | 2.715   | 4.00  | 5.00   | 7.00   | 9.00   | 11.00  | 3.216 | 7.458   | 2.816   | 4.00  | 5.00   | 7.00   | 9.00   | 11.00   |
| 0.10 | 3.026 | 0.2588440 | 0.0187933 | 1.40 | 1.40 | 5.104   | 1.587   | 3.00  | 4.00   | 5.00   | 6.00   | 7.00   | 3.216 | 5.336   | 1.695   | 3.00  | 4.00   | 5.00   | 6.00   | 8.00    |
| 0.10 | 3.026 | 0.2588440 | 0.0187933 | 0.90 | 1.40 | 31.882  | 22.172  | 11.00 | 16.00  | 26.00  | 41.00  | 60.00  | 3.216 | 35.505  | 25.234  | 12.00 | 18.00  | 28.00  | 46.00  | 68.00   |
| 0.10 | 3.026 | 0.2588440 | 0.0187933 | 0.80 | 1.40 | 10.587  | 4.588   | 6.00  | 7.00   | 10.00  | 13.00  | 17.00  | 3.216 | 11.300  | 4.928   | 6.00  | 8.00   | 10.00  | 14.00  | 18.00   |
| 0.10 | 3.026 | 0.2588440 | 0.0187933 | 0.70 | 1.40 | 6.048   | 1.866   | 4.00  | 5.00   | 6.00   | 7.00   | 8.00   | 3.216 | 6.324   | 1.946   | 4.00  | 5.00   | 6.00   | 7.00   | 9.00    |
| 0.10 | 3.026 | 0.2588440 | 0.0187933 | 0.60 | 1.40 | 4.244   | 1.030   | 3.00  | 4.00   | 4.00   | 5.00   | 6.00   | 3.216 | 4.404   | 1.045   | 3.00  | 4.00   | 4.00   | 5.00   | 6.00    |
| 0.10 | 3.026 | 0.2588440 | 0.0187933 | 0.50 | 1.40 | 3.277   | 0.651   | 3.00  | 3.00   | 3.00   | 4.00   | 4.00   | 3.216 | 3.407   | 0.670   | 3.00  | 3.00   | 3.00   | 4.00   | 4.00    |
| 0.10 | 3.026 | 0.2588440 | 0.0187933 | 1.10 | 0.90 | 37.257  | 28.190  | 11.00 | 17.00  | 29.00  | 48.00  | 74.00  | 3.216 | 41.277  | 30.958  | 12.00 | 20.00  | 32.00  | 54.00  | 81.00   |
| 0.10 | 3.026 | 0.2588440 | 0.0187933 | 1.20 | 0.90 | 12.016  | 5.942   | 6.00  | 8.00   | 11.00  | 15.00  | 20.00  | 3.216 | 12.835  | 6.366   | 6.00  | 8.00   | 11.00  | 16.00  | 21.00   |
| 0.10 | 3.026 | 0.2588440 | 0.0187933 | 1.30 | 0.90 | 7.177   | 2.744   | 4.00  | 5.00   | 7.00   | 9.00   | 11.00  | 3.216 | 7.503   | 2.821   | 4.00  | 5.00   | 7.00   | 9.00   | 11.00   |
| 0.10 | 3.026 | 0.2588440 | 0.0187933 | 1.40 | 0.90 | 5.160   | 1.627   | 3.00  | 4.00   | 5.00   | 6.00   | 7.00   | 3.216 | 5.354   | 1.663   | 3.00  | 4.00   | 5.00   | 6.00   | 8.00    |
| 0.10 | 3.026 | 0.2588440 | 0.0187933 | 0.90 | 0.90 | 35.812  | 26.157  | 12.00 | 17.00  | 28.00  | 46.00  | 69.00  | 3.216 | 40.093  | 29.749  | 13.00 | 19.00  | 32.00  | 52.00  | 77.00   |
| 0.10 | 3.026 | 0.2588440 | 0.0187933 | 0.80 | 0.90 | 10.664  | 4.653   | 6.00  | 7.00   | 10.00  | 13.00  | 17.00  | 3.216 | 11.373  | 4.964   | 6.00  | 8.00   | 10.00  | 14.00  | 18.00   |
| 0.10 | 3.026 | 0.2588440 | 0.0187933 | 0.70 | 0.90 | 6.042   | 1.858   | 4.00  | 5.00   | 6.00   | 7.00   | 9.00   | 3.216 | 6.344   | 1.971   | 4.00  | 5.00   | 6.00   | 7.00   | 9.00    |
| 0.10 | 3.026 | 0.2588440 | 0.0187933 | 0.60 | 0.90 | 4.224   | 1.041   | 3.00  | 3.00   | 4.00   | 5.00   | 6.00   | 3.216 | 4.402   | 1.051   | 3.00  | 4.00   | 4.00   | 5.00   | 6.00    |
| 0.10 | 3.026 | 0.2588440 | 0.0187933 | 0.50 | 0.90 | 3.281   | 0.659   | 3.00  | 3.00   | 3.00   | 4.00   | 4.00   | 3.216 | 3.414   | 0.675   | 3.00  | 3.00   | 3.00   | 4.00   | 4.00    |
| 0.10 | 3.026 | 0.2588440 | 0.0187933 | 1.10 | 0.80 | 36.528  | 27.331  | 11.00 | 17.00  | 29.00  | 47.00  | 71.00  | 3.216 | 41.763  | 32.021  | 12.00 | 19.00  | 33.00  | 55.00  | 83.00   |
| 0.10 | 3.026 | 0.2588440 | 0.0187933 | 1.20 | 0.80 | 12.196  | 6.036   | 6.00  | 8.00   | 11.00  | 15.00  | 20.00  | 3.216 | 12.863  | 6.424   | 6.00  | 8.00   | 11.00  | 16.00  | 21.00   |
| 0.10 | 3.026 | 0.2588440 | 0.0187933 | 1.30 | 0.80 | 7.179   | 2.754   | 4.00  | 5.00   | 7.00   | 9.00   | 11.00  | 3.216 | 7.422   | 2.799   | 4.00  | 5.00   | 7.00   | 9.00   | 11.00   |
| 0.10 | 3.026 | 0.2588440 | 0.0187933 | 1.40 | 0.80 | 5.138   | 1.637   | 3.00  | 4.00   | 5.00   | 6.00   | 7.00   | 3.216 | 5.360   | 1.713   | 3.00  | 4.00   | 5.00   | 6.00   | 8.00    |
| 0.10 | 3.026 | 0.2588440 | 0.0187933 | 0.90 | 0.80 | 35.888  | 26.045  | 12.00 | 18.00  | 28.00  | 46.00  | 69.00  | 3.216 | 40.600  | 29.455  | 13.00 | 20.00  | 32.00  | 53.00  | 80.00   |
| 0.10 | 3.026 | 0.2588440 | 0.0187933 | 0.80 | 0.80 | 10.646  | 4.661   | 6.00  | 7.00   | 10.00  | 13.00  | 17.00  | 3.216 | 11.289  | 4.971   | 6.00  | 8.00   | 10.00  | 14.00  | 18.00   |
| 0.10 | 3.026 | 0.2588440 | 0.0187933 | 0.70 | 0.80 | 6.055   | 1.891   | 4.00  | 5.00   | 6.00   | 7.00   | 9.00   | 3.216 | 6.329   | 1.940   | 4.00  | 5.00   | 6.00   | 7.00   | 9.00    |
| 0.10 | 3.026 | 0.2588440 | 0.0187933 | 0.60 | 0.80 | 4.233   | 1.053   | 3.00  | 4.00   | 4.00   | 5.00   | 6.00   | 3.216 | 4.386   | 1.052   | 3.00  | 4.00   | 4.00   | 5.00   | 6.00    |
| 0.10 | 3.026 | 0.2588440 | 0.0187933 | 0.50 | 0.80 | 3.279   | 0.659   | 3.00  | 3.00   | 3.00   | 4.00   | 4.00   | 3.216 | 3.400   | 0.675   | 3.00  | 3.00   | 3.00   | 4.00   | 4.00    |
| 0.10 | 3.026 | 0.2588440 | 0.0187933 | 1.10 | 0.70 | 36.580  | 27.160  | 11.00 | 17.00  | 29.00  | 48.00  | 72.00  | 3.216 | 41.067  | 31.483  | 12.00 | 19.00  | 32.00  | 53.00  | 81.00   |
| 0.10 | 3.026 | 0.2588440 | 0.0187933 | 1.20 | 0.70 | 12.141  | 6.052   | 6.00  | 8.00   | 11.00  | 15.00  | 20.00  | 3.216 | 12.934  | 6.388   | 6.00  | 8.00   | 12.00  | 16.00  | 21.00   |
| 0.10 | 3.026 | 0.2588440 | 0.0187933 | 1.30 | 0.70 | 7.155   | 2.727   | 4.00  | 5.00   | 7.00   | 9.00   | 11.00  | 3.216 | 7.461   | 2.776   | 4.00  | 5.00   | 7.00   | 9.00   | 11.00   |
| 0.10 | 3.026 | 0.2588440 | 0.0187933 | 1.40 | 0.70 | 5.170   | 1.624   | 3.00  | 4.00   | 5.00   | 6.00   | 7.00   | 3.216 | 5.372   | 1.682   | 3.00  | 4.00   | 5.00   | 6.00   | 8.00    |
| 0.10 | 3.026 | 0.2588440 | 0.0187933 | 0.90 | 0.70 | 36.081  | 25.964  | 12.00 | 18.00  | 29.00  | 46.00  | 70.00  | 3.216 | 39.866  | 29.073  | 13.00 | 19.00  | 32.00  | 51.00  | 77.00   |
| 0.10 | 3.026 | 0.2588440 | 0.0187933 | 0.80 | 0.70 | 10.690  | 4.544   | 6.00  | 7.00   | 10.00  | 13.00  | 17.00  | 3.216 | 11.364  | 5.000   | 6.00  | 8.00   | 10.00  | 14.00  | 18.00   |
| 0.10 | 3.026 | 0.2588440 | 0.0187933 | 0.70 | 0.70 | 6.062   | 1.841   | 4.00  | 5.00   | 6.00   | 7.00   | 8.00   | 3.216 | 6.343   | 1.950   | 4.00  | 5.00   | 6.00   | 7.00   | 9.00    |
| 0.10 | 3.026 | 0.2588440 | 0.0187933 | 0.60 | 0.70 | 4.239   | 1.028   | 3.00  | 4.00   | 4.00   | 5.00   | 6.00   | 3.216 | 4.405   | 1.081   | 3.00  | 4.00   | 4.00   | 5.00   | 6.00    |
| 0.10 | 3.026 | 0.2588440 | 0.0187933 | 0.50 | 0.70 | 3.274   | 0.657   | 3.00  | 3.00   | 3.00   | 4.00   | 4.00   | 3.216 | 3.397   | 0.673   | 3.00  | 3.00   | 3.00   | 4.00   | 4.00    |
| 0.10 | 3.026 | 0.2588440 | 0.0187933 | 1.10 | 0.60 | 35.870  | 26.044  | 12.00 | 18.00  | 29.00  | 47.00  | 70.00  | 3.216 | 40.352  | 30.279  | 12.00 | 19.00  | 32.00  | 53.00  | 80.00   |
| 0.10 | 3.026 | 0.2588440 | 0.0187933 | 1.20 | 0.60 | 11.992  | 5.915   | 6.00  | 8.00   | 11.00  | 15.00  | 20.00  | 3.216 | 12.712  | 6.291   | 6.00  | 8.00   | 11.00  | 16.00  | 21.00   |
| 0.10 | 3.026 | 0.2588440 | 0.0187933 | 1.30 | 0.60 | 7.155   | 2.763   | 4.00  | 5.00   | 7.00   | 9.00   | 11.00  | 3.216 | 7.505   | 2.862   | 4.00  | 5.00   | 7.00   | 9.00   | 11.00   |
| 0.10 | 3.026 | 0.2588440 | 0.0187933 | 1.40 | 0.60 | 5.119   | 1.618   | 3.00  | 4.00   | 5.00   | 6.00   | 7.00   | 3.216 | 5.343   | 1.680   | 3.00  | 4.00   | 5.00   | 6.00   | 8.00    |
| 0.10 | 3.026 | 0.2588440 | 0.0187933 | 0.90 | 0.60 | 34.739  | 24.482  | 12.00 | 18.00  | 28.00  | 45.00  | 66.00  | 3.216 | 40.109  | 29.199  | 13.00 | 20.00  | 32.00  | 52.00  | 78.10   |
| 0.10 | 3.026 | 0.2588440 | 0.0187933 | 0.80 | 0.60 | 10.678  | 4.594   | 6.00  | 7.00   | 10.00  | 13.00  | 17.00  | 3.216 | 11.452  | 4.964   | 6.00  | 8.00   | 10.00  | 14.00  | 18.00   |
| 0.10 | 3.026 | 0.2588440 | 0.0187933 | 0.70 | 0.60 | 6.083   | 1.877   | 4.00  | 5.00   | 6.00   | 7.00   | 9.00   | 3.216 | 6.362   | 1.935   | 4.00  | 5.00   | 6.00   | 7.00   | 9.00    |
| 0.10 | 3.026 | 0.2588440 | 0.0187933 | 0.60 | 0.60 | 4.257   | 1.049   | 3.00  | 4.00   | 4.00   | 5.00   | 6.00   | 3.216 | 4.406   | 1.059   | 3.00  | 4.00   | 4.00   | 5.00   | 6.00    |
| 0.10 | 3.026 | 0.2588440 | 0.0187933 | 0.50 | 0.60 | 3.276   | 0.651   | 3.00  | 3.00   | 3.00   | 4.00   | 4.00   | 3.216 | 3.414   | 0.684   | 3.00  | 3.00   | 3.00   | 4.00   | 4.00    |
| 0.10 | 3.026 | 0.2588440 | 0.0187933 | 1.10 | 0.50 | 34.350  | 23.970  | 11.00 | 18.00  | 28.00  | 44.00  | 65.00  | 3.216 | 39.335  | 28.585  | 12.00 | 19.00  | 31.00  | 51.00  | 77.00   |
| 0.10 | 3.026 | 0.2588440 | 0.0187933 | 1.20 | 0.50 | 12.160  | 6.013   | 6.00  | 8.00   | 11.00  | 15.00  | 20.00  | 3.216 | 12.909  | 6.375   | 6.00  | 8.00   | 12.00  | 16.00  | 21.00   |
| 0.10 | 3.026 | 0.2588440 | 0.0187933 | 1.30 | 0.50 | 7.201   | 2.722   | 4.00  | 5.00   | 7.00   | 9.00   | 11.00  | 3.216 | 7.455   | 2.820   | 4.00  | 5.00   | 7.00   | 9.00   | 11.00   |
| 0.10 | 3.026 | 0.2588440 | 0.0187933 | 1.40 | 0.50 | 5.133   | 1.640   | 3.00  | 4.00   | 5.00   | 6.00   | 7.00   | 3.216 | 5.380   | 1.713   | 3.00  | 4.00   | 5.00   | 6.00   | 8.00    |
| 0.10 | 3.026 | 0.2588440 | 0.0187933 | 0.90 | 0.50 | 33.621  | 23.105  | 12.00 | 17.00  | 27.00  | 43.00  | 64.00  | 3.216 | 38.530  | 27.216  | 13.00 | 20.00  | 31.00  | 49.00  | 73.00   |
| 0.10 | 3.026 | 0.2588440 | 0.0187933 | 0.80 | 0.50 | 10.678  | 4.625   | 6.00  | 7.00   | 10.00  | 13.00  | 17.00  | 3.216 | 11.301  | 4.877   | 6.00  | 8.00   | 10.00  | 14.00  | 18.00   |
| 0.10 | 3.026 | 0.2588440 | 0.0187933 | 0.70 | 0.50 | 6.078   | 1.897   | 4.00  | 5.00   | 6.00   | 7.00   | 9.00   | 3.216 | 6.349   | 1.947   | 4.00  | 5.00   | 6.00   | 7.00   | 9.00    |
| 0.10 | 3.026 | 0.2588440 | 0.0187933 | 0.60 | 0.50 | 4.237   | 1.041   | 3.00  | 4.00   | 4.00   | 5.00   | 6.00   | 3.216 | 4.396   | 1.057   | 3.00  | 4.00   | 4.00   | 5.00   | 6.00    |
| 0.10 | 3.026 | 0.2588440 | 0.0187933 | 0.50 | 0.50 | 3.277   | 0.653   | 3.00  | 3.00   | 3.00   | 4.00   | 4.00   | 3.216 | 3.395   | 0.662   | 3.00  | 3.00   | 3.00   | 4.00   | 4.00    |
| 0.15 | 3.219 | 0.3210252 | 0.0284260 | 1.00 | 1.00 | 370.938 | 365.482 | 45.00 | 112.00 | 262.00 | 514.00 | 833.10 | 3.402 | 500.240 | 496.316 | 57.00 | 150.00 | 350.00 | 683.00 | 1147.10 |
| 0.15 | 3.219 | 0.3210252 | 0.0284260 | 1.10 | 1.10 | 40.554  | 34.059  | 10.00 | 17.00  | 30.00  | 54.00  | 85.00  | 3.402 | 47.261  | 39.795  | 11.00 | 19.00  | 35.00  | 63.00  | 98.00   |
| 0.15 | 3.219 | 0.3210252 | 0.0284260 | 1.20 |      |         |         |       |        |        |        |        |       |         |         |       |        |        |        |         |

|      |       |           |           |      |      |        |        |       |       |       |       |       |       |        |        |       |       |       |       |        |
|------|-------|-----------|-----------|------|------|--------|--------|-------|-------|-------|-------|-------|-------|--------|--------|-------|-------|-------|-------|--------|
| 0.15 | 3.219 | 0.3210252 | 0.0284260 | 0.70 | 1.10 | 5.686  | 2.019  | 4.00  | 4.00  | 5.00  | 7.00  | 8.00  | 3.402 | 5.908  | 2.079  | 4.00  | 4.00  | 6.00  | 7.00  | 9.00   |
| 0.15 | 3.219 | 0.3210252 | 0.0284260 | 0.60 | 1.10 | 3.839  | 1.051  | 3.00  | 3.00  | 4.00  | 4.00  | 5.00  | 3.402 | 4.013  | 1.097  | 3.00  | 3.00  | 4.00  | 5.00  | 5.00   |
| 0.15 | 3.219 | 0.3210252 | 0.0284260 | 0.50 | 1.10 | 2.921  | 0.682  | 2.00  | 2.00  | 3.00  | 3.00  | 4.00  | 3.402 | 3.047  | 0.710  | 2.00  | 3.00  | 3.00  | 3.00  | 4.00   |
| 0.15 | 3.219 | 0.3210252 | 0.0284260 | 1.10 | 1.20 | 39.706 | 32.784 | 10.00 | 17.00 | 30.00 | 53.00 | 82.00 | 3.402 | 45.173 | 37.781 | 11.00 | 19.00 | 34.00 | 60.00 | 95.00  |
| 0.15 | 3.219 | 0.3210252 | 0.0284260 | 1.20 | 1.20 | 12.229 | 7.043  | 5.00  | 7.00  | 11.00 | 15.00 | 22.00 | 3.402 | 13.003 | 7.680  | 6.00  | 8.00  | 11.00 | 16.00 | 23.00  |
| 0.15 | 3.219 | 0.3210252 | 0.0284260 | 1.30 | 1.20 | 6.719  | 2.924  | 4.00  | 5.00  | 6.00  | 8.00  | 11.00 | 3.402 | 7.098  | 3.137  | 4.00  | 5.00  | 6.00  | 9.00  | 11.00  |
| 0.15 | 3.219 | 0.3210252 | 0.0284260 | 1.40 | 1.20 | 4.703  | 1.687  | 3.00  | 4.00  | 4.00  | 6.00  | 7.00  | 3.402 | 4.943  | 1.777  | 3.00  | 4.00  | 5.00  | 6.00  | 7.00   |
| 0.15 | 3.219 | 0.3210252 | 0.0284260 | 0.90 | 1.20 | 40.994 | 33.468 | 11.00 | 18.00 | 31.00 | 54.00 | 84.00 | 3.402 | 47.903 | 39.819 | 12.00 | 20.00 | 36.00 | 63.00 | 100.00 |
| 0.15 | 3.219 | 0.3210252 | 0.0284260 | 0.80 | 1.20 | 10.801 | 5.484  | 5.00  | 7.00  | 9.00  | 13.00 | 18.00 | 3.402 | 11.410 | 5.887  | 6.00  | 7.00  | 10.00 | 14.00 | 19.00  |
| 0.15 | 3.219 | 0.3210252 | 0.0284260 | 0.70 | 1.20 | 5.673  | 2.037  | 3.00  | 4.00  | 5.00  | 7.00  | 8.00  | 3.402 | 5.933  | 2.120  | 4.00  | 4.00  | 6.00  | 7.00  | 9.00   |
| 0.15 | 3.219 | 0.3210252 | 0.0284260 | 0.60 | 1.20 | 3.830  | 1.054  | 3.00  | 3.00  | 4.00  | 4.00  | 5.00  | 3.402 | 3.988  | 1.077  | 3.00  | 3.00  | 4.00  | 5.00  | 5.00   |
| 0.15 | 3.219 | 0.3210252 | 0.0284260 | 0.50 | 1.20 | 2.925  | 0.693  | 2.00  | 2.00  | 3.00  | 3.00  | 4.00  | 3.402 | 3.032  | 0.705  | 2.00  | 3.00  | 3.00  | 3.00  | 4.00   |
| 0.15 | 3.219 | 0.3210252 | 0.0284260 | 1.10 | 1.30 | 38.074 | 31.424 | 10.00 | 16.00 | 29.00 | 50.00 | 79.00 | 3.402 | 44.692 | 37.174 | 11.00 | 19.00 | 34.00 | 59.00 | 93.00  |
| 0.15 | 3.219 | 0.3210252 | 0.0284260 | 1.20 | 1.30 | 12.172 | 7.108  | 5.00  | 7.00  | 10.00 | 15.00 | 21.00 | 3.402 | 12.960 | 7.515  | 6.00  | 8.00  | 11.00 | 16.00 | 23.00  |
| 0.15 | 3.219 | 0.3210252 | 0.0284260 | 1.30 | 1.30 | 6.718  | 2.930  | 4.00  | 5.00  | 6.00  | 8.00  | 11.00 | 3.402 | 7.082  | 3.069  | 4.00  | 5.00  | 7.00  | 9.00  | 11.00  |
| 0.15 | 3.219 | 0.3210252 | 0.0284260 | 1.40 | 1.30 | 4.746  | 1.695  | 3.00  | 4.00  | 4.00  | 6.00  | 7.00  | 3.402 | 4.949  | 1.767  | 3.00  | 4.00  | 5.00  | 6.00  | 7.00   |
| 0.15 | 3.219 | 0.3210252 | 0.0284260 | 0.90 | 1.30 | 39.290 | 31.405 | 11.00 | 17.00 | 30.00 | 52.00 | 80.00 | 3.402 | 45.536 | 37.428 | 12.00 | 19.00 | 35.00 | 60.00 | 94.00  |
| 0.15 | 3.219 | 0.3210252 | 0.0284260 | 0.80 | 1.30 | 10.698 | 5.328  | 5.00  | 7.00  | 10.00 | 13.00 | 18.00 | 3.402 | 11.392 | 5.922  | 5.00  | 7.00  | 10.00 | 14.00 | 19.00  |
| 0.15 | 3.219 | 0.3210252 | 0.0284260 | 0.70 | 1.30 | 5.656  | 2.017  | 4.00  | 4.00  | 5.00  | 7.00  | 8.00  | 3.402 | 5.939  | 2.104  | 4.00  | 4.00  | 6.00  | 7.00  | 9.00   |
| 0.15 | 3.219 | 0.3210252 | 0.0284260 | 0.60 | 1.30 | 3.835  | 1.067  | 3.00  | 3.00  | 4.00  | 4.00  | 5.00  | 3.402 | 3.992  | 1.097  | 3.00  | 3.00  | 4.00  | 5.00  | 5.00   |
| 0.15 | 3.219 | 0.3210252 | 0.0284260 | 0.50 | 1.30 | 2.928  | 0.692  | 2.00  | 2.00  | 3.00  | 3.00  | 4.00  | 3.402 | 3.035  | 0.690  | 2.00  | 3.00  | 3.00  | 3.00  | 4.00   |
| 0.15 | 3.219 | 0.3210252 | 0.0284260 | 1.10 | 1.40 | 36.306 | 29.720 | 9.00  | 16.00 | 27.00 | 48.00 | 74.00 | 3.402 | 41.629 | 34.459 | 11.00 | 17.00 | 31.00 | 55.00 | 86.10  |
| 0.15 | 3.219 | 0.3210252 | 0.0284260 | 1.20 | 1.40 | 11.936 | 6.850  | 5.00  | 7.00  | 10.00 | 15.00 | 21.00 | 3.402 | 12.800 | 7.448  | 5.00  | 8.00  | 11.00 | 16.00 | 22.00  |
| 0.15 | 3.219 | 0.3210252 | 0.0284260 | 1.30 | 1.40 | 6.737  | 2.955  | 4.00  | 5.00  | 6.00  | 8.00  | 11.00 | 3.402 | 7.085  | 3.088  | 4.00  | 5.00  | 6.00  | 9.00  | 11.00  |
| 0.15 | 3.219 | 0.3210252 | 0.0284260 | 1.40 | 1.40 | 4.721  | 1.703  | 3.00  | 4.00  | 4.00  | 6.00  | 7.00  | 3.402 | 4.940  | 1.789  | 3.00  | 4.00  | 5.00  | 6.00  | 7.00   |
| 0.15 | 3.219 | 0.3210252 | 0.0284260 | 0.90 | 1.40 | 37.846 | 29.977 | 10.00 | 16.00 | 29.00 | 50.00 | 77.00 | 3.402 | 44.154 | 36.406 | 12.00 | 19.00 | 33.00 | 58.00 | 91.00  |
| 0.15 | 3.219 | 0.3210252 | 0.0284260 | 0.80 | 1.40 | 10.666 | 5.384  | 5.00  | 7.00  | 9.00  | 13.00 | 18.00 | 3.402 | 11.450 | 5.875  | 6.00  | 7.00  | 10.00 | 14.00 | 19.00  |
| 0.15 | 3.219 | 0.3210252 | 0.0284260 | 0.70 | 1.40 | 5.674  | 2.052  | 3.00  | 4.00  | 5.00  | 7.00  | 8.00  | 3.402 | 5.930  | 2.102  | 4.00  | 4.00  | 6.00  | 7.00  | 9.00   |
| 0.15 | 3.219 | 0.3210252 | 0.0284260 | 0.60 | 1.40 | 3.834  | 1.058  | 3.00  | 3.00  | 4.00  | 4.00  | 5.00  | 3.402 | 4.013  | 1.102  | 3.00  | 3.00  | 4.00  | 5.00  | 5.00   |
| 0.15 | 3.219 | 0.3210252 | 0.0284260 | 0.50 | 1.40 | 2.927  | 0.693  | 2.00  | 2.00  | 3.00  | 3.00  | 4.00  | 3.402 | 3.030  | 0.693  | 2.00  | 3.00  | 3.00  | 3.00  | 4.00   |
| 0.15 | 3.219 | 0.3210252 | 0.0284260 | 1.10 | 0.90 | 42.814 | 35.906 | 10.00 | 18.00 | 32.00 | 56.00 | 90.00 | 3.402 | 48.099 | 40.887 | 11.00 | 19.00 | 36.00 | 65.00 | 100.00 |
| 0.15 | 3.219 | 0.3210252 | 0.0284260 | 1.20 | 0.90 | 12.244 | 7.116  | 5.00  | 7.00  | 10.00 | 15.00 | 21.00 | 3.402 | 13.213 | 7.855  | 6.00  | 8.00  | 11.00 | 17.00 | 23.00  |
| 0.15 | 3.219 | 0.3210252 | 0.0284260 | 1.30 | 0.90 | 6.726  | 2.942  | 4.00  | 5.00  | 6.00  | 8.00  | 10.00 | 3.402 | 7.064  | 3.130  | 4.00  | 5.00  | 6.00  | 9.00  | 11.00  |
| 0.15 | 3.219 | 0.3210252 | 0.0284260 | 1.40 | 0.90 | 4.716  | 1.696  | 3.00  | 4.00  | 4.00  | 6.00  | 7.00  | 3.402 | 4.929  | 1.776  | 3.00  | 4.00  | 5.00  | 6.00  | 7.00   |
| 0.15 | 3.219 | 0.3210252 | 0.0284260 | 0.90 | 0.90 | 43.682 | 35.685 | 11.00 | 18.00 | 33.00 | 58.00 | 91.00 | 3.402 | 52.078 | 43.475 | 13.00 | 21.00 | 39.00 | 70.00 | 108.00 |
| 0.15 | 3.219 | 0.3210252 | 0.0284260 | 0.80 | 0.90 | 10.715 | 5.517  | 5.00  | 7.00  | 9.00  | 13.00 | 18.00 | 3.402 | 11.360 | 5.859  | 6.00  | 7.00  | 10.00 | 14.00 | 19.00  |
| 0.15 | 3.219 | 0.3210252 | 0.0284260 | 0.70 | 0.90 | 5.656  | 2.002  | 4.00  | 4.00  | 5.00  | 7.00  | 8.00  | 3.402 | 5.933  | 2.106  | 4.00  | 4.00  | 6.00  | 7.00  | 9.00   |
| 0.15 | 3.219 | 0.3210252 | 0.0284260 | 0.60 | 0.90 | 3.839  | 1.060  | 3.00  | 3.00  | 4.00  | 4.00  | 5.00  | 3.402 | 4.009  | 1.102  | 3.00  | 3.00  | 4.00  | 5.00  | 5.00   |
| 0.15 | 3.219 | 0.3210252 | 0.0284260 | 0.50 | 0.90 | 2.915  | 0.685  | 2.00  | 2.00  | 3.00  | 3.00  | 4.00  | 3.402 | 3.031  | 0.694  | 2.00  | 3.00  | 3.00  | 3.00  | 4.00   |
| 0.15 | 3.219 | 0.3210252 | 0.0284260 | 1.10 | 0.80 | 43.093 | 35.800 | 10.00 | 18.00 | 32.00 | 58.00 | 91.00 | 3.402 | 49.083 | 42.084 | 11.00 | 20.00 | 37.00 | 64.25 | 103.00 |
| 0.15 | 3.219 | 0.3210252 | 0.0284260 | 1.20 | 0.80 | 12.298 | 7.145  | 5.00  | 7.00  | 11.00 | 16.00 | 22.00 | 3.402 | 13.066 | 7.720  | 6.00  | 8.00  | 11.00 | 16.00 | 23.00  |
| 0.15 | 3.219 | 0.3210252 | 0.0284260 | 1.30 | 0.80 | 6.762  | 2.936  | 4.00  | 5.00  | 6.00  | 8.00  | 11.00 | 3.402 | 7.123  | 3.127  | 4.00  | 5.00  | 7.00  | 9.00  | 11.00  |
| 0.15 | 3.219 | 0.3210252 | 0.0284260 | 1.40 | 0.80 | 4.736  | 1.687  | 3.00  | 4.00  | 4.00  | 6.00  | 7.00  | 3.402 | 4.981  | 1.784  | 3.00  | 4.00  | 5.00  | 6.00  | 7.00   |
| 0.15 | 3.219 | 0.3210252 | 0.0284260 | 0.90 | 0.80 | 44.541 | 37.026 | 11.00 | 19.00 | 33.00 | 59.00 | 93.00 | 3.402 | 52.947 | 44.132 | 13.00 | 22.00 | 40.00 | 70.00 | 110.00 |
| 0.15 | 3.219 | 0.3210252 | 0.0284260 | 0.80 | 0.80 | 10.789 | 5.639  | 5.00  | 7.00  | 9.00  | 13.00 | 18.00 | 3.402 | 11.448 | 5.897  | 6.00  | 7.00  | 10.00 | 14.00 | 19.00  |
| 0.15 | 3.219 | 0.3210252 | 0.0284260 | 0.70 | 0.80 | 5.660  | 2.022  | 4.00  | 4.00  | 5.00  | 7.00  | 8.00  | 3.402 | 5.897  | 2.086  | 4.00  | 4.00  | 5.00  | 7.00  | 9.00   |
| 0.15 | 3.219 | 0.3210252 | 0.0284260 | 0.60 | 0.80 | 3.840  | 1.036  | 3.00  | 3.00  | 4.00  | 4.00  | 5.00  | 3.402 | 4.013  | 1.096  | 3.00  | 3.00  | 4.00  | 5.00  | 5.00   |
| 0.15 | 3.219 | 0.3210252 | 0.0284260 | 0.50 | 0.80 | 2.937  | 0.696  | 2.00  | 2.00  | 3.00  | 3.00  | 4.00  | 3.402 | 3.042  | 0.688  | 2.00  | 3.00  | 3.00  | 3.00  | 4.00   |
| 0.15 | 3.219 | 0.3210252 | 0.0284260 | 1.10 | 0.70 | 43.798 | 37.043 | 10.00 | 18.00 | 33.00 | 58.00 | 91.10 | 3.402 | 49.692 | 41.805 | 12.00 | 20.00 | 37.00 | 67.00 | 105.00 |
| 0.15 | 3.219 | 0.3210252 | 0.0284260 | 1.20 | 0.70 | 12.185 | 7.112  | 5.00  | 7.00  | 10.00 | 15.00 | 21.00 | 3.402 | 13.185 | 7.765  | 6.00  | 8.00  | 11.00 | 17.00 | 23.00  |
| 0.15 | 3.219 | 0.3210252 | 0.0284260 | 1.30 | 0.70 | 6.725  | 2.939  | 4.00  | 5.00  | 6.00  | 8.00  | 11.00 | 3.402 | 7.154  | 3.141  | 4.00  | 5.00  | 7.00  | 9.00  | 11.00  |
| 0.15 | 3.219 | 0.3210252 | 0.0284260 | 1.40 | 0.70 | 4.730  | 1.692  | 3.00  | 4.00  | 4.00  | 6.00  | 7.00  | 3.402 | 4.937  | 1.744  | 3.00  | 4.00  | 5.00  | 6.00  | 7.00   |
| 0.15 | 3.219 | 0.3210252 | 0.0284260 | 0.90 | 0.70 | 44.633 | 36.504 | 11.00 | 19.00 | 34.00 | 59.00 | 91.00 | 3.402 | 52.322 | 44.321 | 13.00 | 21.00 | 39.00 | 70.00 | 109.00 |
| 0.15 | 3.219 | 0.3210252 | 0.0284260 | 0.80 | 0.70 | 10.690 | 5.481  | 5.00  | 7.00  | 9.00  | 13.00 | 18.00 | 3.402 | 11.395 | 5.888  | 6.00  | 7.00  | 10.00 | 14.00 | 19.00  |
| 0.15 | 3.219 | 0.3210252 | 0.0284260 | 0.70 | 0.70 | 5.635  | 2.022  | 4.00  | 4.00  | 5.00  | 7.00  | 8.00  | 3.402 | 5.924  | 2.108  | 4.00  | 4.00  | 6.00  | 7.00  | 9.00   |
| 0.15 | 3.219 | 0.3210252 | 0.0284260 | 0.60 | 0.70 | 3.852  | 1.061  | 3.00  | 3.00  | 4.00  | 4.00  | 5.00  | 3.402 | 4.008  | 1.093  | 3.00  | 3.00  | 4.00  | 5.00  | 5.00   |
| 0.15 | 3.219 | 0.3210252 | 0.0284260 | 0.50 | 0.70 | 2.925  | 0.690  | 2.00  | 2.00  | 3.00  | 3.00  | 4.00  | 3.402 | 3.031  | 0.692  | 2.00  | 3.00  | 3.00  | 3.00  | 4.00   |
| 0.15 | 3.219 | 0.3210252 | 0.0284260 | 1.10 | 0.60 | 43.358 | 36.394 | 10.00 |       |       |       |       |       |        |        |       |       |       |       |        |

|      |       |           |           |      |      |        |        |       |       |       |       |       |       |        |        |       |       |       |       |        |
|------|-------|-----------|-----------|------|------|--------|--------|-------|-------|-------|-------|-------|-------|--------|--------|-------|-------|-------|-------|--------|
| 0.15 | 3.219 | 0.3210252 | 0.0284260 | 0.80 | 0.60 | 10.756 | 5.570  | 5.00  | 7.00  | 9.00  | 13.00 | 18.00 | 3.402 | 11.496 | 5.984  | 6.00  | 7.00  | 10.00 | 14.00 | 19.00  |
| 0.15 | 3.219 | 0.3210252 | 0.0284260 | 0.70 | 0.60 | 5.669  | 2.015  | 4.00  | 4.00  | 5.00  | 7.00  | 8.00  | 3.402 | 5.925  | 2.132  | 4.00  | 4.00  | 6.00  | 7.00  | 9.00   |
| 0.15 | 3.219 | 0.3210252 | 0.0284260 | 0.60 | 0.60 | 3.849  | 1.055  | 3.00  | 3.00  | 4.00  | 4.00  | 5.00  | 3.402 | 4.009  | 1.097  | 3.00  | 3.00  | 4.00  | 5.00  | 5.00   |
| 0.15 | 3.219 | 0.3210252 | 0.0284260 | 0.50 | 0.60 | 2.922  | 0.696  | 2.00  | 2.00  | 3.00  | 3.00  | 4.00  | 3.402 | 3.040  | 0.688  | 2.00  | 3.00  | 3.00  | 3.00  | 4.00   |
| 0.15 | 3.219 | 0.3210252 | 0.0284260 | 1.10 | 0.50 | 43.062 | 35.490 | 10.00 | 18.00 | 33.00 | 58.00 | 90.00 | 3.402 | 49.978 | 42.642 | 11.00 | 20.00 | 37.00 | 67.00 | 106.00 |
| 0.15 | 3.219 | 0.3210252 | 0.0284260 | 1.20 | 0.50 | 12.318 | 7.115  | 5.00  | 7.00  | 11.00 | 15.00 | 22.00 | 3.402 | 13.093 | 7.687  | 6.00  | 8.00  | 11.00 | 16.00 | 23.00  |
| 0.15 | 3.219 | 0.3210252 | 0.0284260 | 1.30 | 0.50 | 6.756  | 2.982  | 4.00  | 5.00  | 6.00  | 8.00  | 11.00 | 3.402 | 7.086  | 3.094  | 4.00  | 5.00  | 6.00  | 9.00  | 11.00  |
| 0.15 | 3.219 | 0.3210252 | 0.0284260 | 1.40 | 0.50 | 4.711  | 1.680  | 3.00  | 4.00  | 4.00  | 6.00  | 7.00  | 3.402 | 4.917  | 1.742  | 3.00  | 4.00  | 5.00  | 6.00  | 7.00   |
| 0.15 | 3.219 | 0.3210252 | 0.0284260 | 0.90 | 0.50 | 45.181 | 37.553 | 12.00 | 19.00 | 34.00 | 60.00 | 94.00 | 3.402 | 52.848 | 44.721 | 13.00 | 21.00 | 39.00 | 70.00 | 111.00 |
| 0.15 | 3.219 | 0.3210252 | 0.0284260 | 0.80 | 0.50 | 10.772 | 5.638  | 5.00  | 7.00  | 9.00  | 13.00 | 18.00 | 3.402 | 11.684 | 6.094  | 6.00  | 7.00  | 10.00 | 14.00 | 20.00  |
| 0.15 | 3.219 | 0.3210252 | 0.0284260 | 0.70 | 0.50 | 5.677  | 2.050  | 4.00  | 4.00  | 5.00  | 7.00  | 8.00  | 3.402 | 5.923  | 2.085  | 4.00  | 4.00  | 6.00  | 7.00  | 9.00   |
| 0.15 | 3.219 | 0.3210252 | 0.0284260 | 0.60 | 0.50 | 3.838  | 1.051  | 3.00  | 3.00  | 4.00  | 4.00  | 5.00  | 3.402 | 3.992  | 1.083  | 3.00  | 3.00  | 4.00  | 5.00  | 5.00   |
| 0.15 | 3.219 | 0.3210252 | 0.0284260 | 0.50 | 0.50 | 2.920  | 0.687  | 2.00  | 2.00  | 3.00  | 3.00  | 4.00  | 3.402 | 3.035  | 0.692  | 2.00  | 3.00  | 3.00  | 3.00  | 4.00   |

ARL<sub>0</sub> = 370

ARL<sub>0</sub> = 500

| Case 3    |       |           |           |      |      |        |        |       |       |       |       |        |       |        |        |       |       |       |       |        |
|-----------|-------|-----------|-----------|------|------|--------|--------|-------|-------|-------|-------|--------|-------|--------|--------|-------|-------|-------|-------|--------|
| $\phi=80$ |       |           |           |      |      |        |        |       |       |       |       |        |       |        |        |       |       |       |       |        |
| 0.05      | 2.686 | 0.1809939 | 0.0093239 | 1.10 | 1.10 | 50.547 | 35.374 | 17.00 | 26.00 | 41.00 | 65.00 | 97.00  | 2.880 | 56.633 | 40.257 | 19.00 | 28.00 | 46.00 | 74.00 | 108.00 |
| 0.05      | 2.686 | 0.1809939 | 0.0093239 | 1.20 | 1.10 | 19.452 | 9.196  | 10.00 | 13.00 | 18.00 | 24.00 | 32.00  | 2.880 | 20.881 | 9.918  | 10.00 | 14.00 | 19.00 | 26.00 | 34.00  |
| 0.05      | 2.686 | 0.1809939 | 0.0093239 | 1.30 | 1.10 | 11.769 | 4.381  | 7.00  | 9.00  | 11.00 | 14.00 | 18.00  | 2.880 | 12.489 | 4.705  | 7.00  | 9.00  | 12.00 | 15.00 | 19.00  |
| 0.05      | 2.686 | 0.1809939 | 0.0093239 | 1.40 | 1.10 | 8.620  | 2.778  | 5.00  | 7.00  | 8.00  | 10.00 | 12.00  | 2.880 | 9.042  | 2.857  | 6.00  | 7.00  | 9.00  | 11.00 | 13.00  |
| 0.05      | 2.686 | 0.1809939 | 0.0093239 | 0.90 | 1.10 | 49.237 | 33.107 | 18.00 | 26.00 | 40.00 | 63.00 | 92.00  | 2.880 | 54.825 | 38.079 | 20.00 | 28.00 | 45.00 | 69.00 | 104.00 |
| 0.05      | 2.686 | 0.1809939 | 0.0093239 | 0.80 | 1.10 | 17.328 | 7.227  | 10.00 | 12.00 | 16.00 | 21.00 | 27.00  | 2.880 | 18.575 | 7.804  | 10.00 | 13.00 | 17.00 | 23.00 | 29.00  |
| 0.05      | 2.686 | 0.1809939 | 0.0093239 | 0.70 | 1.10 | 10.169 | 3.161  | 7.00  | 8.00  | 10.00 | 12.00 | 14.00  | 2.880 | 10.679 | 3.282  | 7.00  | 8.00  | 10.00 | 12.00 | 15.00  |
| 0.05      | 2.686 | 0.1809939 | 0.0093239 | 0.60 | 1.10 | 7.088  | 1.747  | 5.00  | 6.00  | 7.00  | 8.00  | 9.00   | 2.880 | 7.422  | 1.776  | 5.00  | 6.00  | 7.00  | 8.00  | 10.00  |
| 0.05      | 2.686 | 0.1809939 | 0.0093239 | 0.50 | 1.10 | 5.445  | 1.109  | 4.00  | 5.00  | 5.00  | 6.00  | 7.00   | 2.880 | 5.699  | 1.129  | 4.00  | 5.00  | 6.00  | 6.00  | 7.00   |
| 0.05      | 2.686 | 0.1809939 | 0.0093239 | 1.10 | 1.20 | 49.250 | 33.255 | 17.00 | 26.00 | 41.00 | 63.00 | 93.00  | 2.880 | 54.918 | 38.387 | 19.00 | 28.00 | 44.00 | 71.00 | 105.00 |
| 0.05      | 2.686 | 0.1809939 | 0.0093239 | 1.20 | 1.20 | 19.347 | 9.220  | 10.00 | 13.00 | 17.00 | 24.00 | 31.00  | 2.880 | 20.563 | 9.807  | 10.00 | 14.00 | 19.00 | 25.00 | 33.00  |
| 0.05      | 2.686 | 0.1809939 | 0.0093239 | 1.30 | 1.20 | 11.785 | 4.422  | 7.00  | 9.00  | 11.00 | 14.00 | 18.00  | 2.880 | 12.529 | 4.662  | 7.00  | 9.00  | 12.00 | 15.00 | 19.00  |
| 0.05      | 2.686 | 0.1809939 | 0.0093239 | 1.40 | 1.20 | 8.654  | 2.820  | 5.00  | 7.00  | 8.00  | 10.00 | 12.00  | 2.880 | 9.050  | 2.875  | 6.00  | 7.00  | 9.00  | 11.00 | 13.00  |
| 0.05      | 2.686 | 0.1809939 | 0.0093239 | 0.90 | 1.20 | 47.258 | 31.243 | 17.00 | 25.00 | 39.00 | 60.00 | 87.00  | 2.880 | 53.130 | 36.114 | 19.00 | 28.00 | 43.00 | 68.00 | 100.00 |
| 0.05      | 2.686 | 0.1809939 | 0.0093239 | 0.80 | 1.20 | 17.480 | 7.373  | 10.00 | 12.00 | 16.00 | 21.00 | 27.00  | 2.880 | 18.364 | 7.658  | 10.00 | 13.00 | 17.00 | 22.00 | 28.10  |
| 0.05      | 2.686 | 0.1809939 | 0.0093239 | 0.70 | 1.20 | 10.142 | 3.113  | 7.00  | 8.00  | 10.00 | 12.00 | 14.00  | 2.880 | 10.607 | 3.265  | 7.00  | 8.00  | 10.00 | 12.00 | 15.00  |
| 0.05      | 2.686 | 0.1809939 | 0.0093239 | 0.60 | 1.20 | 7.109  | 1.761  | 5.00  | 6.00  | 7.00  | 8.00  | 9.00   | 2.880 | 7.416  | 1.805  | 5.00  | 6.00  | 7.00  | 8.00  | 10.00  |
| 0.05      | 2.686 | 0.1809939 | 0.0093239 | 0.50 | 1.20 | 5.453  | 1.113  | 4.00  | 5.00  | 5.00  | 6.00  | 7.00   | 2.880 | 5.679  | 1.133  | 4.00  | 5.00  | 6.00  | 6.00  | 7.00   |
| 0.05      | 2.686 | 0.1809939 | 0.0093239 | 1.10 | 1.30 | 45.830 | 30.614 | 16.00 | 24.00 | 38.00 | 59.00 | 86.00  | 2.880 | 51.901 | 35.851 | 18.00 | 27.00 | 42.00 | 67.00 | 98.00  |
| 0.05      | 2.686 | 0.1809939 | 0.0093239 | 1.20 | 1.30 | 19.350 | 9.165  | 10.00 | 13.00 | 17.00 | 24.00 | 31.00  | 2.880 | 20.488 | 9.564  | 10.00 | 14.00 | 19.00 | 25.00 | 33.00  |
| 0.05      | 2.686 | 0.1809939 | 0.0093239 | 1.30 | 1.30 | 11.873 | 4.470  | 7.00  | 9.00  | 11.00 | 14.00 | 18.00  | 2.880 | 12.408 | 4.684  | 7.00  | 9.00  | 12.00 | 15.00 | 19.00  |
| 0.05      | 2.686 | 0.1809939 | 0.0093239 | 1.40 | 1.30 | 8.586  | 2.746  | 5.00  | 7.00  | 8.00  | 10.00 | 12.00  | 2.880 | 9.032  | 2.844  | 6.00  | 7.00  | 9.00  | 11.00 | 13.00  |
| 0.05      | 2.686 | 0.1809939 | 0.0093239 | 0.90 | 1.30 | 45.163 | 29.014 | 17.00 | 25.00 | 38.00 | 58.00 | 85.00  | 2.880 | 50.433 | 33.765 | 19.00 | 27.00 | 41.00 | 64.00 | 94.00  |
| 0.05      | 2.686 | 0.1809939 | 0.0093239 | 0.80 | 1.30 | 17.183 | 7.270  | 10.00 | 12.00 | 16.00 | 21.00 | 27.00  | 2.880 | 18.356 | 7.579  | 10.00 | 13.00 | 17.00 | 22.00 | 29.00  |
| 0.05      | 2.686 | 0.1809939 | 0.0093239 | 0.70 | 1.30 | 10.155 | 3.188  | 7.00  | 8.00  | 10.00 | 12.00 | 14.00  | 2.880 | 10.683 | 3.275  | 7.00  | 8.00  | 10.00 | 12.00 | 15.00  |
| 0.05      | 2.686 | 0.1809939 | 0.0093239 | 0.60 | 1.30 | 7.077  | 1.700  | 5.00  | 6.00  | 7.00  | 8.00  | 9.00   | 2.880 | 7.420  | 1.773  | 5.00  | 6.00  | 7.00  | 8.00  | 10.00  |
| 0.05      | 2.686 | 0.1809939 | 0.0093239 | 0.50 | 1.30 | 5.430  | 1.087  | 4.00  | 5.00  | 5.00  | 6.00  | 7.00   | 2.880 | 5.686  | 1.130  | 4.00  | 5.00  | 6.00  | 6.00  | 7.00   |
| 0.05      | 2.686 | 0.1809939 | 0.0093239 | 1.10 | 1.40 | 43.720 | 28.816 | 16.00 | 23.00 | 36.00 | 57.00 | 82.00  | 2.880 | 48.376 | 32.276 | 17.00 | 25.00 | 40.00 | 62.00 | 91.00  |
| 0.05      | 2.686 | 0.1809939 | 0.0093239 | 1.20 | 1.40 | 19.249 | 9.176  | 10.00 | 13.00 | 17.00 | 24.00 | 31.00  | 2.880 | 20.437 | 9.532  | 10.00 | 14.00 | 18.00 | 25.00 | 33.00  |
| 0.05      | 2.686 | 0.1809939 | 0.0093239 | 1.30 | 1.40 | 11.813 | 4.419  | 7.00  | 9.00  | 11.00 | 14.00 | 18.00  | 2.880 | 12.436 | 4.687  | 7.00  | 9.00  | 12.00 | 15.00 | 19.00  |
| 0.05      | 2.686 | 0.1809939 | 0.0093239 | 1.40 | 1.40 | 8.553  | 2.754  | 5.00  | 7.00  | 8.00  | 10.00 | 12.00  | 2.880 | 9.037  | 2.876  | 6.00  | 7.00  | 9.00  | 11.00 | 13.00  |
| 0.05      | 2.686 | 0.1809939 | 0.0093239 | 0.90 | 1.40 | 42.475 | 26.722 | 17.00 | 24.00 | 35.00 | 54.00 | 77.00  | 2.880 | 48.185 | 30.601 | 18.00 | 27.00 | 40.00 | 61.00 | 88.00  |
| 0.05      | 2.686 | 0.1809939 | 0.0093239 | 0.80 | 1.40 | 17.132 | 7.266  | 9.00  | 12.00 | 16.00 | 21.00 | 27.00  | 2.880 | 18.301 | 7.646  | 10.00 | 13.00 | 17.00 | 22.00 | 28.00  |
| 0.05      | 2.686 | 0.1809939 | 0.0093239 | 0.70 | 1.40 | 10.087 | 3.125  | 7.00  | 8.00  | 10.00 | 12.00 | 14.00  | 2.880 | 10.664 | 3.263  | 7.00  | 8.00  | 10.00 | 12.25 | 15.00  |
| 0.05      | 2.686 | 0.1809939 | 0.0093239 | 0.60 | 1.40 | 7.090  | 1.730  | 5.00  | 6.00  | 7.00  | 8.00  | 9.00   | 2.880 | 7.415  | 1.783  | 5.00  | 6.00  | 7.00  | 8.00  | 10.00  |
| 0.05      | 2.686 | 0.1809939 | 0.0093239 | 0.50 | 1.40 | 5.452  | 1.117  | 4.00  | 5.00  | 5.00  | 6.00  | 7.00   | 2.880 | 5.665  | 1.119  | 4.00  | 5.00  | 6.00  | 6.00  | 7.00   |
| 0.05      | 2.686 | 0.1809939 | 0.0093239 | 1.10 | 0.90 | 53.029 | 37.615 | 18.00 | 27.00 | 43.00 | 69.00 | 102.00 | 2.880 | 58.561 | 41.678 | 19.00 | 29.00 | 47.00 | 76.00 | 114.00 |
| 0.05      | 2.686 | 0.1809939 | 0.0093239 | 1.20 | 0.90 | 19.569 | 9.378  | 10.00 | 13.00 | 18.00 | 24.00 | 32.00  | 2.880 | 20.850 | 10.011 | 10.00 | 14.00 | 19.00 | 26.00 | 34.00  |
| 0.05      | 2.686 | 0.1809939 | 0.0093239 | 1.30 | 0.90 | 11.960 | 4.579  | 7.00  | 9.00  | 11.00 | 14.00 | 18.00  | 2.880 | 12.511 | 4.683  | 7.00  | 9.00  | 12.00 | 15.00 | 19.00  |
| 0.05      | 2.686 | 0.1809939 | 0.0093239 | 1.40 | 0.90 | 8.651  | 2.768  | 6.00  | 7.00  | 8.00  | 10.00 | 12.00  | 2.880 | 9.048  | 2.904  | 6.00  | 7.00  | 9.00  | 11.00 | 13.00  |
| 0.05      | 2.686 | 0.1809939 | 0.0093239 | 0.90 | 0.90 | 50.396 | 33.333 | 19.00 | 27.00 | 42.00 | 64.00 | 93.00  | 2.880 | 56.023 | 38.000 | 20.00 | 29.00 | 45.00 | 72.00 | 107.00 |
| 0.05      | 2.686 | 0.1809939 | 0.0093239 | 0.80 | 0.90 | 17.478 | 7.437  | 10.00 | 12.00 | 16.00 | 21.00 | 27.00  | 2.880 | 18.515 | 7.847  | 10.00 | 13.00 | 17.00 | 22.00 | 29.00  |
| 0.05      | 2.686 | 0.1809939 | 0.0093239 | 0.70 | 0.90 | 10.164 | 3.186  | 7.00  | 8.00  | 10.00 | 1     |        |       |        |        |       |       |       |       |        |

|      |       |           |           |      |      |         |         |       |        |        |        |        |       |         |         |       |        |        |        |         |
|------|-------|-----------|-----------|------|------|---------|---------|-------|--------|--------|--------|--------|-------|---------|---------|-------|--------|--------|--------|---------|
| 0.05 | 2.686 | 0.1809939 | 0.0093239 | 1.20 | 0.80 | 19.675  | 9.643   | 10.00 | 13.00  | 18.00  | 24.00  | 32.00  | 2.880 | 20.930  | 10.165  | 10.00 | 14.00  | 19.00  | 26.00  | 34.00   |
| 0.05 | 2.686 | 0.1809939 | 0.0093239 | 1.30 | 0.80 | 11.890  | 4.428   | 7.00  | 9.00   | 11.00  | 14.00  | 18.00  | 2.880 | 12.513  | 4.644   | 7.00  | 9.00   | 12.00  | 15.00  | 19.00   |
| 0.05 | 2.686 | 0.1809939 | 0.0093239 | 1.40 | 0.80 | 8.596   | 2.794   | 5.00  | 7.00   | 8.00   | 10.00  | 12.00  | 2.880 | 9.023   | 2.849   | 6.00  | 7.00   | 9.00   | 11.00  | 13.00   |
| 0.05 | 2.686 | 0.1809939 | 0.0093239 | 0.90 | 0.80 | 50.015  | 33.260  | 19.00 | 27.00  | 41.00  | 64.00  | 94.00  | 2.880 | 55.812  | 38.110  | 20.00 | 29.00  | 45.00  | 71.00  | 105.00  |
| 0.05 | 2.686 | 0.1809939 | 0.0093239 | 0.80 | 0.80 | 17.466  | 7.337   | 10.00 | 12.00  | 16.00  | 21.00  | 27.00  | 2.880 | 18.569  | 7.795   | 10.00 | 13.00  | 17.00  | 22.00  | 29.00   |
| 0.05 | 2.686 | 0.1809939 | 0.0093239 | 0.70 | 0.80 | 10.130  | 3.128   | 7.00  | 8.00   | 10.00  | 12.00  | 14.00  | 2.880 | 10.659  | 3.276   | 7.00  | 8.00   | 10.00  | 12.00  | 15.00   |
| 0.05 | 2.686 | 0.1809939 | 0.0093239 | 0.60 | 0.80 | 7.105   | 1.724   | 5.00  | 6.00   | 7.00   | 8.00   | 9.00   | 2.880 | 7.460   | 1.789   | 5.00  | 6.00   | 7.00   | 8.00   | 10.00   |
| 0.05 | 2.686 | 0.1809939 | 0.0093239 | 0.50 | 0.80 | 5.442   | 1.113   | 4.00  | 5.00   | 5.00   | 6.00   | 7.00   | 2.880 | 5.681   | 1.140   | 4.00  | 5.00   | 6.00   | 7.00   | 7.00    |
| 0.05 | 2.686 | 0.1809939 | 0.0093239 | 1.10 | 0.70 | 48.580  | 32.491  | 18.00 | 26.00  | 40.00  | 62.00  | 90.00  | 2.880 | 54.738  | 36.721  | 19.00 | 29.00  | 45.00  | 71.00  | 103.00  |
| 0.05 | 2.686 | 0.1809939 | 0.0093239 | 1.20 | 0.70 | 19.512  | 9.324   | 10.00 | 13.00  | 18.00  | 24.00  | 32.00  | 2.880 | 20.852  | 9.978   | 10.00 | 14.00  | 19.00  | 25.00  | 34.00   |
| 0.05 | 2.686 | 0.1809939 | 0.0093239 | 1.30 | 0.70 | 11.883  | 4.534   | 7.00  | 9.00   | 11.00  | 14.00  | 18.00  | 2.880 | 12.494  | 4.679   | 7.00  | 9.00   | 12.00  | 15.00  | 19.00   |
| 0.05 | 2.686 | 0.1809939 | 0.0093239 | 1.40 | 0.70 | 8.681   | 2.814   | 5.00  | 7.00   | 8.00   | 10.00  | 12.00  | 2.880 | 9.066   | 2.894   | 6.00  | 7.00   | 9.00   | 11.00  | 13.00   |
| 0.05 | 2.686 | 0.1809939 | 0.0093239 | 0.90 | 0.70 | 46.879  | 29.734  | 18.00 | 26.00  | 39.00  | 59.00  | 85.00  | 2.880 | 53.534  | 35.142  | 20.00 | 29.00  | 44.00  | 68.00  | 100.00  |
| 0.05 | 2.686 | 0.1809939 | 0.0093239 | 0.80 | 0.70 | 17.514  | 7.327   | 10.00 | 12.00  | 16.00  | 21.00  | 27.00  | 2.880 | 18.560  | 7.848   | 10.00 | 13.00  | 17.00  | 22.00  | 29.00   |
| 0.05 | 2.686 | 0.1809939 | 0.0093239 | 0.70 | 0.70 | 10.127  | 3.136   | 7.00  | 8.00   | 10.00  | 12.00  | 14.00  | 2.880 | 10.702  | 3.260   | 7.00  | 8.00   | 10.00  | 13.00  | 15.00   |
| 0.05 | 2.686 | 0.1809939 | 0.0093239 | 0.60 | 0.70 | 7.112   | 1.767   | 5.00  | 6.00   | 7.00   | 8.00   | 9.00   | 2.880 | 7.437   | 1.785   | 5.00  | 6.00   | 7.00   | 8.00   | 10.00   |
| 0.05 | 2.686 | 0.1809939 | 0.0093239 | 0.50 | 0.70 | 5.449   | 1.111   | 4.00  | 5.00   | 5.00   | 6.00   | 7.00   | 2.880 | 5.679   | 1.130   | 4.00  | 5.00   | 6.00   | 7.00   | 7.00    |
| 0.05 | 2.686 | 0.1809939 | 0.0093239 | 1.10 | 0.60 | 44.430  | 27.653  | 18.00 | 25.00  | 38.00  | 56.00  | 80.00  | 2.880 | 49.469  | 31.391  | 19.00 | 28.00  | 42.00  | 63.00  | 90.00   |
| 0.05 | 2.686 | 0.1809939 | 0.0093239 | 1.20 | 0.60 | 19.543  | 9.236   | 10.00 | 13.00  | 18.00  | 24.00  | 32.00  | 2.880 | 20.565  | 9.666   | 10.00 | 14.00  | 19.00  | 25.00  | 33.00   |
| 0.05 | 2.686 | 0.1809939 | 0.0093239 | 1.30 | 0.60 | 11.881  | 4.474   | 7.00  | 9.00   | 11.00  | 14.00  | 18.00  | 2.880 | 12.533  | 4.631   | 7.00  | 9.00   | 12.00  | 15.00  | 19.00   |
| 0.05 | 2.686 | 0.1809939 | 0.0093239 | 1.40 | 0.60 | 8.611   | 2.790   | 5.00  | 7.00   | 8.00   | 10.00  | 12.00  | 2.880 | 9.064   | 2.895   | 6.00  | 7.00   | 9.00   | 11.00  | 13.00   |
| 0.05 | 2.686 | 0.1809939 | 0.0093239 | 0.90 | 0.60 | 43.051  | 25.429  | 18.00 | 25.00  | 37.00  | 55.00  | 75.00  | 2.880 | 49.187  | 30.173  | 20.00 | 28.00  | 41.00  | 62.00  | 89.00   |
| 0.05 | 2.686 | 0.1809939 | 0.0093239 | 0.80 | 0.60 | 17.418  | 7.234   | 10.00 | 12.00  | 16.00  | 21.00  | 27.00  | 2.880 | 18.585  | 7.721   | 10.00 | 13.00  | 17.00  | 23.00  | 29.00   |
| 0.05 | 2.686 | 0.1809939 | 0.0093239 | 0.70 | 0.60 | 10.183  | 3.164   | 7.00  | 8.00   | 10.00  | 12.00  | 14.00  | 2.880 | 10.630  | 3.257   | 7.00  | 8.00   | 10.00  | 12.00  | 15.00   |
| 0.05 | 2.686 | 0.1809939 | 0.0093239 | 0.60 | 0.60 | 7.087   | 1.757   | 5.00  | 6.00   | 7.00   | 8.00   | 9.00   | 2.880 | 7.435   | 1.801   | 5.00  | 6.00   | 7.00   | 8.00   | 10.00   |
| 0.05 | 2.686 | 0.1809939 | 0.0093239 | 0.50 | 0.60 | 5.437   | 1.094   | 4.00  | 5.00   | 5.00   | 6.00   | 7.00   | 2.880 | 5.690   | 1.131   | 4.00  | 5.00   | 6.00   | 7.00   | 7.00    |
| 0.05 | 2.686 | 0.1809939 | 0.0093239 | 1.10 | 0.50 | 38.468  | 21.988  | 17.00 | 23.00  | 33.00  | 48.00  | 67.00  | 2.880 | 42.529  | 24.449  | 19.00 | 25.00  | 37.00  | 53.00  | 74.00   |
| 0.05 | 2.686 | 0.1809939 | 0.0093239 | 1.20 | 0.50 | 19.253  | 8.739   | 10.00 | 13.00  | 18.00  | 24.00  | 31.00  | 2.880 | 20.313  | 9.200   | 10.00 | 14.00  | 19.00  | 25.00  | 32.00   |
| 0.05 | 2.686 | 0.1809939 | 0.0093239 | 1.30 | 0.50 | 11.823  | 4.489   | 7.00  | 9.00   | 11.00  | 14.00  | 18.00  | 2.880 | 12.537  | 4.657   | 7.00  | 9.00   | 12.00  | 15.00  | 19.00   |
| 0.05 | 2.686 | 0.1809939 | 0.0093239 | 1.40 | 0.50 | 8.652   | 2.762   | 5.00  | 7.00   | 8.00   | 10.00  | 12.00  | 2.880 | 8.944   | 2.841   | 6.00  | 7.00   | 9.00   | 10.00  | 13.00   |
| 0.05 | 2.686 | 0.1809939 | 0.0093239 | 0.90 | 0.50 | 37.734  | 20.349  | 17.00 | 23.00  | 33.00  | 47.00  | 65.00  | 2.880 | 42.254  | 23.330  | 19.00 | 26.00  | 37.00  | 52.25  | 73.00   |
| 0.05 | 2.686 | 0.1809939 | 0.0093239 | 0.80 | 0.50 | 17.014  | 6.879   | 10.00 | 12.00  | 16.00  | 20.00  | 26.00  | 2.880 | 18.370  | 7.552   | 10.00 | 13.00  | 17.00  | 22.00  | 28.00   |
| 0.05 | 2.686 | 0.1809939 | 0.0093239 | 0.70 | 0.50 | 10.152  | 3.100   | 7.00  | 8.00   | 10.00  | 12.00  | 14.00  | 2.880 | 10.632  | 3.304   | 7.00  | 8.00   | 10.00  | 12.00  | 15.00   |
| 0.05 | 2.686 | 0.1809939 | 0.0093239 | 0.60 | 0.50 | 7.157   | 1.775   | 5.00  | 6.00   | 7.00   | 8.00   | 9.00   | 2.880 | 7.425   | 1.805   | 5.00  | 6.00   | 7.00   | 8.00   | 10.00   |
| 0.05 | 2.686 | 0.1809939 | 0.0093239 | 0.50 | 0.50 | 5.456   | 1.113   | 4.00  | 5.00   | 5.00   | 6.00   | 7.00   | 2.880 | 5.701   | 1.146   | 4.00  | 5.00   | 6.00   | 7.00   | 7.00    |
| 0.10 | 3.015 | 0.2595725 | 0.0188190 | 1.00 | 1.00 | 370.785 | 365.286 | 46.00 | 111.00 | 259.00 | 509.00 | 845.00 | 3.204 | 499.594 | 484.227 | 62.00 | 152.00 | 343.00 | 694.00 | 1148.00 |
| 0.10 | 3.015 | 0.2595725 | 0.0188190 | 1.10 | 1.10 | 57.525  | 48.172  | 14.00 | 24.00  | 43.00  | 76.00  | 120.00 | 3.204 | 68.429  | 59.078  | 16.00 | 27.00  | 50.00  | 91.00  | 145.00  |
| 0.10 | 3.015 | 0.2595725 | 0.0188190 | 1.20 | 1.10 | 19.084  | 11.621  | 8.00  | 11.00  | 16.00  | 24.00  | 34.00  | 3.204 | 20.917  | 12.814  | 8.00  | 12.00  | 18.00  | 27.00  | 37.00   |
| 0.10 | 3.015 | 0.2595725 | 0.0188190 | 1.30 | 1.10 | 10.753  | 5.035   | 5.00  | 7.00   | 10.00  | 13.00  | 18.00  | 3.204 | 11.198  | 5.237   | 6.00  | 7.00   | 10.00  | 14.00  | 18.00   |
| 0.10 | 3.015 | 0.2595725 | 0.0188190 | 1.40 | 1.10 | 7.450   | 2.938   | 4.00  | 5.00   | 7.00   | 9.00   | 11.00  | 3.204 | 7.844   | 3.058   | 5.00  | 6.00   | 7.00   | 9.00   | 12.00   |
| 0.10 | 3.015 | 0.2595725 | 0.0188190 | 0.90 | 1.10 | 61.398  | 50.782  | 16.00 | 26.00  | 46.00  | 80.00  | 127.00 | 3.204 | 72.729  | 59.638  | 18.00 | 30.00  | 55.00  | 97.00  | 150.00  |
| 0.10 | 3.015 | 0.2595725 | 0.0188190 | 0.80 | 1.10 | 17.031  | 9.286   | 8.00  | 10.00  | 15.00  | 21.00  | 29.00  | 3.204 | 18.537  | 10.346  | 8.00  | 11.00  | 16.00  | 23.00  | 32.00   |
| 0.10 | 3.015 | 0.2595725 | 0.0188190 | 0.70 | 1.10 | 8.972   | 3.439   | 5.00  | 7.00   | 8.00   | 11.00  | 14.00  | 3.204 | 9.481   | 3.606   | 6.00  | 7.00   | 9.00   | 11.00  | 14.00   |
| 0.10 | 3.015 | 0.2595725 | 0.0188190 | 0.60 | 1.10 | 6.008   | 1.773   | 4.00  | 5.00   | 6.00   | 7.00   | 8.00   | 3.204 | 6.280   | 1.837   | 4.00  | 5.00   | 6.00   | 7.00   | 9.00    |
| 0.10 | 3.015 | 0.2595725 | 0.0188190 | 0.50 | 1.10 | 4.511   | 1.084   | 3.00  | 4.00   | 4.00   | 5.00   | 6.00   | 3.204 | 4.703   | 1.125   | 3.00  | 4.00   | 5.00   | 5.00   | 6.00    |
| 0.10 | 3.015 | 0.2595725 | 0.0188190 | 1.10 | 1.20 | 55.225  | 45.242  | 14.00 | 23.00  | 42.00  | 73.00  | 114.00 | 3.204 | 64.160  | 53.273  | 15.00 | 26.00  | 49.00  | 86.00  | 134.00  |
| 0.10 | 3.015 | 0.2595725 | 0.0188190 | 1.20 | 1.20 | 19.093  | 11.870  | 8.00  | 11.00  | 16.00  | 24.00  | 34.00  | 3.204 | 20.685  | 12.552  | 8.00  | 12.00  | 18.00  | 26.00  | 37.00   |
| 0.10 | 3.015 | 0.2595725 | 0.0188190 | 1.30 | 1.20 | 10.684  | 4.997   | 5.00  | 7.00   | 10.00  | 13.00  | 17.00  | 3.204 | 11.331  | 5.344   | 6.00  | 8.00   | 10.00  | 14.00  | 18.00   |
| 0.10 | 3.015 | 0.2595725 | 0.0188190 | 1.40 | 1.20 | 7.445   | 2.932   | 4.00  | 5.00   | 7.00   | 9.00   | 11.00  | 3.204 | 7.795   | 3.006   | 4.00  | 6.00   | 7.00   | 9.00   | 12.00   |
| 0.10 | 3.015 | 0.2595725 | 0.0188190 | 0.90 | 1.20 | 58.160  | 47.799  | 15.00 | 25.00  | 43.00  | 77.00  | 120.00 | 3.204 | 68.399  | 55.782  | 17.00 | 29.00  | 52.00  | 91.25  | 141.10  |
| 0.10 | 3.015 | 0.2595725 | 0.0188190 | 0.80 | 1.20 | 16.778  | 9.064   | 8.00  | 10.00  | 15.00  | 21.00  | 28.00  | 3.204 | 18.308  | 9.820   | 8.00  | 11.00  | 16.00  | 23.00  | 31.00   |
| 0.10 | 3.015 | 0.2595725 | 0.0188190 | 0.70 | 1.20 | 8.966   | 3.454   | 5.00  | 6.00   | 8.00   | 11.00  | 14.00  | 3.204 | 9.427   | 3.603   | 6.00  | 7.00   | 9.00   | 11.00  | 14.00   |
| 0.10 | 3.015 | 0.2595725 | 0.0188190 | 0.60 | 1.20 | 6.028   | 1.789   | 4.00  | 5.00   | 6.00   | 7.00   | 8.00   | 3.204 | 6.322   | 1.871   | 4.00  | 5.00   | 6.00   | 7.00   | 9.00    |
| 0.10 | 3.015 | 0.2595725 | 0.0188190 | 0.50 | 1.20 | 4.514   | 1.097   | 3.00  | 4.00   | 4.00   | 5.00   | 6.00   | 3.204 | 4.675   | 1.104   | 3.00  | 4.00   | 5.00   | 5.00   | 6.00    |
| 0.10 | 3.015 | 0.2595725 | 0.0188190 | 1.10 | 1.30 | 51.469  | 42.301  | 13.00 | 22.00  | 39.00  | 68.00  | 107.00 | 3.204 | 59.913  | 49.962  | 15.00 | 25.00  | 45.00  | 79.00  | 125.00  |
| 0.10 | 3.015 | 0.2595725 | 0.0188190 | 1.20 | 1.30 | 18.718  | 11.172  | 8.00  | 11.00  | 16.00  | 24.00  | 33.00  | 3.204 | 20.190  | 12.553  | 8.00  | 11.00  | 17.00  | 25.00  | 36.00   |
| 0.10 | 3.015 | 0.2595725 | 0.0188190 | 1.30 | 1.30 | 10.647  | 4.902   | 5.00  | 7.00   | 10.    |        |        |       |         |         |       |        |        |        |         |

|      |       |           |           |      |      |         |         |       |        |        |        |        |       |         |         |       |        |        |        |         |
|------|-------|-----------|-----------|------|------|---------|---------|-------|--------|--------|--------|--------|-------|---------|---------|-------|--------|--------|--------|---------|
| 0.10 | 3.015 | 0.2595725 | 0.0188190 | 0.50 | 1.30 | 4.503   | 1.100   | 3.00  | 4.00   | 4.00   | 5.00   | 6.00   | 3.204 | 4.710   | 1.124   | 3.00  | 4.00   | 5.00   | 5.00   | 6.00    |
| 0.10 | 3.015 | 0.2595725 | 0.0188190 | 1.10 | 1.40 | 46.998  | 37.515  | 13.00 | 21.00  | 36.00  | 62.00  | 96.00  | 3.204 | 54.996  | 44.799  | 14.00 | 24.00  | 42.00  | 72.00  | 114.00  |
| 0.10 | 3.015 | 0.2595725 | 0.0188190 | 1.20 | 1.40 | 18.570  | 11.104  | 8.00  | 11.00  | 16.00  | 23.00  | 33.00  | 3.204 | 19.965  | 12.074  | 8.00  | 11.00  | 17.00  | 25.00  | 36.00   |
| 0.10 | 3.015 | 0.2595725 | 0.0188190 | 1.30 | 1.40 | 10.658  | 4.931   | 5.00  | 7.00   | 10.00  | 13.00  | 17.00  | 3.204 | 11.124  | 5.144   | 6.00  | 7.00   | 10.00  | 14.00  | 18.00   |
| 0.10 | 3.015 | 0.2595725 | 0.0188190 | 1.40 | 1.40 | 7.399   | 2.893   | 4.00  | 5.00   | 7.00   | 9.00   | 11.00  | 3.204 | 7.819   | 3.050   | 4.00  | 6.00   | 7.00   | 9.00   | 12.00   |
| 0.10 | 3.015 | 0.2595725 | 0.0188190 | 0.90 | 1.40 | 50.537  | 39.765  | 14.00 | 22.00  | 39.00  | 66.00  | 102.00 | 3.204 | 58.164  | 46.514  | 16.00 | 25.00  | 45.00  | 76.00  | 118.00  |
| 0.10 | 3.015 | 0.2595725 | 0.0188190 | 0.80 | 1.40 | 16.606  | 8.760   | 8.00  | 10.00  | 15.00  | 20.00  | 28.00  | 3.204 | 18.032  | 9.771   | 8.00  | 11.00  | 16.00  | 22.00  | 31.00   |
| 0.10 | 3.015 | 0.2595725 | 0.0188190 | 0.70 | 1.40 | 8.907   | 3.419   | 5.00  | 6.00   | 8.00   | 11.00  | 13.00  | 3.204 | 9.460   | 3.642   | 6.00  | 7.00   | 9.00   | 11.00  | 14.00   |
| 0.10 | 3.015 | 0.2595725 | 0.0188190 | 0.60 | 1.40 | 6.020   | 1.803   | 4.00  | 5.00   | 6.00   | 7.00   | 8.00   | 3.204 | 6.284   | 1.834   | 4.00  | 5.00   | 6.00   | 7.00   | 9.00    |
| 0.10 | 3.015 | 0.2595725 | 0.0188190 | 0.50 | 1.40 | 4.516   | 1.091   | 3.00  | 4.00   | 4.00   | 5.00   | 6.00   | 3.204 | 4.689   | 1.115   | 3.00  | 4.00   | 5.00   | 5.00   | 6.00    |
| 0.10 | 3.015 | 0.2595725 | 0.0188190 | 1.10 | 0.90 | 62.363  | 52.816  | 15.00 | 25.00  | 47.00  | 82.00  | 131.10 | 3.204 | 71.979  | 62.295  | 16.00 | 29.00  | 53.00  | 96.00  | 153.00  |
| 0.10 | 3.015 | 0.2595725 | 0.0188190 | 1.20 | 0.90 | 19.418  | 12.156  | 8.00  | 11.00  | 16.00  | 24.00  | 35.00  | 3.204 | 21.055  | 12.945  | 8.00  | 12.00  | 18.00  | 27.00  | 38.00   |
| 0.10 | 3.015 | 0.2595725 | 0.0188190 | 1.30 | 0.90 | 10.736  | 5.078   | 5.00  | 7.00   | 10.00  | 13.00  | 17.00  | 3.204 | 11.360  | 5.392   | 6.00  | 8.00   | 10.00  | 14.00  | 18.00   |
| 0.10 | 3.015 | 0.2595725 | 0.0188190 | 1.40 | 0.90 | 7.411   | 2.871   | 4.00  | 5.00   | 7.00   | 9.00   | 11.00  | 3.204 | 7.908   | 3.105   | 5.00  | 6.00   | 7.00   | 10.00  | 12.00   |
| 0.10 | 3.015 | 0.2595725 | 0.0188190 | 0.90 | 0.90 | 65.392  | 53.131  | 16.00 | 28.00  | 49.00  | 87.00  | 136.00 | 3.204 | 77.685  | 65.786  | 18.00 | 32.00  | 58.00  | 104.00 | 162.00  |
| 0.10 | 3.015 | 0.2595725 | 0.0188190 | 0.80 | 0.90 | 17.370  | 9.586   | 8.00  | 11.00  | 15.00  | 22.00  | 30.00  | 3.204 | 18.486  | 10.159  | 8.00  | 11.00  | 16.00  | 23.00  | 32.00   |
| 0.10 | 3.015 | 0.2595725 | 0.0188190 | 0.70 | 0.90 | 8.965   | 3.435   | 5.00  | 7.00   | 8.00   | 11.00  | 13.00  | 3.204 | 9.446   | 3.691   | 6.00  | 7.00   | 9.00   | 11.00  | 14.00   |
| 0.10 | 3.015 | 0.2595725 | 0.0188190 | 0.60 | 0.90 | 5.998   | 1.791   | 4.00  | 5.00   | 6.00   | 7.00   | 8.00   | 3.204 | 6.292   | 1.844   | 4.00  | 5.00   | 6.00   | 7.00   | 9.00    |
| 0.10 | 3.015 | 0.2595725 | 0.0188190 | 0.50 | 0.90 | 4.506   | 1.086   | 3.00  | 4.00   | 4.00   | 5.00   | 6.00   | 3.204 | 4.685   | 1.123   | 3.00  | 4.00   | 5.00   | 5.00   | 6.00    |
| 0.10 | 3.015 | 0.2595725 | 0.0188190 | 1.10 | 0.80 | 61.642  | 51.911  | 15.00 | 25.00  | 46.00  | 81.00  | 130.00 | 3.204 | 73.884  | 64.226  | 17.00 | 29.00  | 55.00  | 98.00  | 158.00  |
| 0.10 | 3.015 | 0.2595725 | 0.0188190 | 1.20 | 0.80 | 19.217  | 11.876  | 8.00  | 11.00  | 16.00  | 24.00  | 35.00  | 3.204 | 20.899  | 13.006  | 8.00  | 12.00  | 18.00  | 26.00  | 37.00   |
| 0.10 | 3.015 | 0.2595725 | 0.0188190 | 1.30 | 0.80 | 10.636  | 4.975   | 5.00  | 7.00   | 10.00  | 13.00  | 17.00  | 3.204 | 11.237  | 5.268   | 6.00  | 8.00   | 10.00  | 14.00  | 18.00   |
| 0.10 | 3.015 | 0.2595725 | 0.0188190 | 1.40 | 0.80 | 7.455   | 2.894   | 4.00  | 5.00   | 7.00   | 9.00   | 11.00  | 3.204 | 7.824   | 3.038   | 5.00  | 6.00   | 7.00   | 9.00   | 12.00   |
| 0.10 | 3.015 | 0.2595725 | 0.0188190 | 0.90 | 0.80 | 66.732  | 55.526  | 17.00 | 28.00  | 50.00  | 88.00  | 139.00 | 3.204 | 78.524  | 66.592  | 19.00 | 32.00  | 58.00  | 105.00 | 165.00  |
| 0.10 | 3.015 | 0.2595725 | 0.0188190 | 0.80 | 0.80 | 17.112  | 9.196   | 8.00  | 11.00  | 15.00  | 21.00  | 29.00  | 3.204 | 18.565  | 10.228  | 9.00  | 11.00  | 16.00  | 23.00  | 32.00   |
| 0.10 | 3.015 | 0.2595725 | 0.0188190 | 0.70 | 0.80 | 8.931   | 3.407   | 5.00  | 7.00   | 8.00   | 11.00  | 13.00  | 3.204 | 9.446   | 3.622   | 6.00  | 7.00   | 9.00   | 11.00  | 14.00   |
| 0.10 | 3.015 | 0.2595725 | 0.0188190 | 0.60 | 0.80 | 5.973   | 1.739   | 4.00  | 5.00   | 6.00   | 7.00   | 8.00   | 3.204 | 6.307   | 1.895   | 4.00  | 5.00   | 6.00   | 7.00   | 9.00    |
| 0.10 | 3.015 | 0.2595725 | 0.0188190 | 0.50 | 0.80 | 4.515   | 1.096   | 3.00  | 4.00   | 4.00   | 5.00   | 6.00   | 3.204 | 4.694   | 1.129   | 3.00  | 4.00   | 5.00   | 5.00   | 6.00    |
| 0.10 | 3.015 | 0.2595725 | 0.0188190 | 1.10 | 0.70 | 61.148  | 50.701  | 15.00 | 25.00  | 46.00  | 82.00  | 127.00 | 3.204 | 71.593  | 61.217  | 17.00 | 28.00  | 53.00  | 95.00  | 150.00  |
| 0.10 | 3.015 | 0.2595725 | 0.0188190 | 1.20 | 0.70 | 19.322  | 11.828  | 8.00  | 11.00  | 16.00  | 24.00  | 35.00  | 3.204 | 20.865  | 12.744  | 8.00  | 12.00  | 18.00  | 26.00  | 38.00   |
| 0.10 | 3.015 | 0.2595725 | 0.0188190 | 1.30 | 0.70 | 10.737  | 5.048   | 5.00  | 7.00   | 10.00  | 13.00  | 17.00  | 3.204 | 11.402  | 5.484   | 6.00  | 8.00   | 10.00  | 14.00  | 19.00   |
| 0.10 | 3.015 | 0.2595725 | 0.0188190 | 1.40 | 0.70 | 7.428   | 2.897   | 4.00  | 5.00   | 7.00   | 9.00   | 11.00  | 3.204 | 7.861   | 3.098   | 4.90  | 6.00   | 7.00   | 9.00   | 12.00   |
| 0.10 | 3.015 | 0.2595725 | 0.0188190 | 0.90 | 0.70 | 66.100  | 54.136  | 17.00 | 28.00  | 50.00  | 88.00  | 137.00 | 3.204 | 78.058  | 64.943  | 19.00 | 32.00  | 59.00  | 104.00 | 162.00  |
| 0.10 | 3.015 | 0.2595725 | 0.0188190 | 0.80 | 0.70 | 16.993  | 9.207   | 8.00  | 10.00  | 15.00  | 21.00  | 29.00  | 3.204 | 18.577  | 10.080  | 9.00  | 11.00  | 16.00  | 23.00  | 31.10   |
| 0.10 | 3.015 | 0.2595725 | 0.0188190 | 0.70 | 0.70 | 8.957   | 3.402   | 5.00  | 7.00   | 8.00   | 11.00  | 13.00  | 3.204 | 9.502   | 3.653   | 6.00  | 7.00   | 9.00   | 11.00  | 14.00   |
| 0.10 | 3.015 | 0.2595725 | 0.0188190 | 0.60 | 0.70 | 6.025   | 1.770   | 4.00  | 5.00   | 6.00   | 7.00   | 8.00   | 3.204 | 6.291   | 1.888   | 4.00  | 5.00   | 6.00   | 7.00   | 9.00    |
| 0.10 | 3.015 | 0.2595725 | 0.0188190 | 0.50 | 0.70 | 4.520   | 1.084   | 3.00  | 4.00   | 4.00   | 5.00   | 6.00   | 3.204 | 4.698   | 1.126   | 3.00  | 4.00   | 5.00   | 5.00   | 6.00    |
| 0.10 | 3.015 | 0.2595725 | 0.0188190 | 1.10 | 0.60 | 58.284  | 48.324  | 15.00 | 25.00  | 45.00  | 77.00  | 118.00 | 3.204 | 68.678  | 57.521  | 17.00 | 28.00  | 52.00  | 91.00  | 144.00  |
| 0.10 | 3.015 | 0.2595725 | 0.0188190 | 1.20 | 0.60 | 19.333  | 11.692  | 8.00  | 11.00  | 16.00  | 25.00  | 35.00  | 3.204 | 21.052  | 12.954  | 8.00  | 12.00  | 18.00  | 27.00  | 38.00   |
| 0.10 | 3.015 | 0.2595725 | 0.0188190 | 1.30 | 0.60 | 10.773  | 5.102   | 5.00  | 7.00   | 10.00  | 13.00  | 18.00  | 3.204 | 11.406  | 5.371   | 6.00  | 8.00   | 10.00  | 14.00  | 19.00   |
| 0.10 | 3.015 | 0.2595725 | 0.0188190 | 1.40 | 0.60 | 7.492   | 2.917   | 4.00  | 5.00   | 7.00   | 9.00   | 11.00  | 3.204 | 7.893   | 3.079   | 5.00  | 6.00   | 7.00   | 9.00   | 12.00   |
| 0.10 | 3.015 | 0.2595725 | 0.0188190 | 0.90 | 0.60 | 61.062  | 48.850  | 16.00 | 27.00  | 46.00  | 80.00  | 125.00 | 3.204 | 75.454  | 62.146  | 19.00 | 32.00  | 57.00  | 99.00  | 157.00  |
| 0.10 | 3.015 | 0.2595725 | 0.0188190 | 0.80 | 0.60 | 17.047  | 9.240   | 8.00  | 11.00  | 15.00  | 21.00  | 29.00  | 3.204 | 18.503  | 10.088  | 8.00  | 11.00  | 16.00  | 23.00  | 32.00   |
| 0.10 | 3.015 | 0.2595725 | 0.0188190 | 0.70 | 0.60 | 8.924   | 3.418   | 5.00  | 7.00   | 8.00   | 11.00  | 13.00  | 3.204 | 9.487   | 3.665   | 6.00  | 7.00   | 9.00   | 11.00  | 14.00   |
| 0.10 | 3.015 | 0.2595725 | 0.0188190 | 0.60 | 0.60 | 6.026   | 1.798   | 4.00  | 5.00   | 6.00   | 7.00   | 8.00   | 3.204 | 6.293   | 1.844   | 4.00  | 5.00   | 6.00   | 7.00   | 9.00    |
| 0.10 | 3.015 | 0.2595725 | 0.0188190 | 0.50 | 0.60 | 4.510   | 1.084   | 3.00  | 4.00   | 4.00   | 5.00   | 6.00   | 3.204 | 4.705   | 1.136   | 3.00  | 4.00   | 5.00   | 5.00   | 6.00    |
| 0.10 | 3.015 | 0.2595725 | 0.0188190 | 1.10 | 0.50 | 51.423  | 39.565  | 15.00 | 24.00  | 40.00  | 67.00  | 103.00 | 3.204 | 62.367  | 50.475  | 17.00 | 28.00  | 48.00  | 81.00  | 127.00  |
| 0.10 | 3.015 | 0.2595725 | 0.0188190 | 1.20 | 0.50 | 19.078  | 11.387  | 8.00  | 11.00  | 16.00  | 24.00  | 34.00  | 3.204 | 20.656  | 12.359  | 8.00  | 12.00  | 18.00  | 26.00  | 37.00   |
| 0.10 | 3.015 | 0.2595725 | 0.0188190 | 1.30 | 0.50 | 10.676  | 5.033   | 5.00  | 7.00   | 10.00  | 13.00  | 17.00  | 3.204 | 11.319  | 5.396   | 6.00  | 8.00   | 10.00  | 14.00  | 18.00   |
| 0.10 | 3.015 | 0.2595725 | 0.0188190 | 1.40 | 0.50 | 7.481   | 2.945   | 4.00  | 5.00   | 7.00   | 9.00   | 11.00  | 3.204 | 7.809   | 3.047   | 4.00  | 6.00   | 7.00   | 9.00   | 12.00   |
| 0.10 | 3.015 | 0.2595725 | 0.0188190 | 0.90 | 0.50 | 54.477  | 40.625  | 17.00 | 26.00  | 43.00  | 71.00  | 108.00 | 3.204 | 66.931  | 52.408  | 19.00 | 30.00  | 51.00  | 88.00  | 136.00  |
| 0.10 | 3.015 | 0.2595725 | 0.0188190 | 0.80 | 0.50 | 17.021  | 9.035   | 8.00  | 11.00  | 15.00  | 21.00  | 29.00  | 3.204 | 18.546  | 9.910   | 9.00  | 11.00  | 16.00  | 23.00  | 31.00   |
| 0.10 | 3.015 | 0.2595725 | 0.0188190 | 0.70 | 0.50 | 8.944   | 3.459   | 5.00  | 6.00   | 8.00   | 11.00  | 13.00  | 3.204 | 9.473   | 3.637   | 6.00  | 7.00   | 9.00   | 11.00  | 14.00   |
| 0.10 | 3.015 | 0.2595725 | 0.0188190 | 0.60 | 0.50 | 6.005   | 1.773   | 4.00  | 5.00   | 6.00   | 7.00   | 8.00   | 3.204 | 6.293   | 1.862   | 4.00  | 5.00   | 6.00   | 7.00   | 9.00    |
| 0.10 | 3.015 | 0.2595725 | 0.0188190 | 0.50 | 0.50 | 4.498   | 1.068   | 3.00  | 4.00   | 4.00   | 5.00   | 6.00   | 3.204 | 4.703   | 1.122   | 3.00  | 4.00   | 5.00   | 5.00   | 6.00    |
| 0.15 | 3.209 | 0.3224310 | 0.0286744 | 1.00 | 1.00 | 370.858 | 370.921 | 42.00 | 107.00 | 253.00 | 520.00 | 860.00 | 3.387 | 499.567 | 501.873 | 55.00 | 145.00 | 340.00 | 687.00 | 1140.00 |
| 0.15 | 3.209 | 0.3224310 | 0.0286744 | 1.10 | 1.10 | 67.341  | 60.582  | 13.00 | 25.00  | 49.00  | 91.00  | 144.00 | 3     |         |         |       |        |        |        |         |

|      |       |           |           |      |      |        |        |       |       |       |        |        |       |         |         |       |       |       |        |        |
|------|-------|-----------|-----------|------|------|--------|--------|-------|-------|-------|--------|--------|-------|---------|---------|-------|-------|-------|--------|--------|
| 0.15 | 3.209 | 0.3224310 | 0.0286744 | 0.70 | 1.10 | 8.814  | 3.982  | 5.00  | 6.00  | 8.00  | 11.00  | 14.00  | 3.387 | 9.445   | 4.291   | 5.00  | 6.00  | 8.00  | 11.00  | 15.00  |
| 0.15 | 3.209 | 0.3224310 | 0.0286744 | 0.60 | 1.10 | 5.616  | 1.906  | 4.00  | 4.00  | 5.00  | 7.00   | 8.00   | 3.387 | 5.869   | 1.996   | 4.00  | 4.00  | 5.00  | 7.00   | 9.00   |
| 0.15 | 3.209 | 0.3224310 | 0.0286744 | 0.50 | 1.10 | 4.108  | 1.127  | 3.00  | 3.00  | 4.00  | 5.00   | 6.00   | 3.387 | 4.272   | 1.149   | 3.00  | 3.00  | 4.00  | 5.00   | 6.00   |
| 0.15 | 3.209 | 0.3224310 | 0.0286744 | 1.10 | 1.20 | 64.780 | 56.605 | 13.00 | 24.00 | 48.00 | 88.00  | 140.00 | 3.387 | 75.997  | 68.435  | 14.00 | 27.00 | 55.00 | 102.00 | 167.00 |
| 0.15 | 3.209 | 0.3224310 | 0.0286744 | 1.20 | 1.20 | 20.477 | 14.184 | 7.00  | 10.00 | 17.00 | 27.00  | 40.00  | 3.387 | 22.448  | 16.111  | 7.00  | 11.00 | 18.00 | 29.00  | 44.00  |
| 0.15 | 3.209 | 0.3224310 | 0.0286744 | 1.30 | 1.20 | 10.681 | 5.871  | 5.00  | 7.00  | 9.00  | 13.00  | 18.00  | 3.387 | 11.410  | 6.423   | 5.00  | 7.00  | 10.00 | 14.00  | 20.00  |
| 0.15 | 3.209 | 0.3224310 | 0.0286744 | 1.40 | 1.20 | 7.105  | 3.243  | 4.00  | 5.00  | 6.00  | 9.00   | 11.00  | 3.387 | 7.501   | 3.394   | 4.00  | 5.00  | 7.00  | 9.00   | 12.00  |
| 0.15 | 3.209 | 0.3224310 | 0.0286744 | 0.90 | 1.20 | 75.092 | 66.884 | 15.00 | 27.00 | 55.00 | 101.00 | 162.10 | 3.387 | 92.687  | 84.533  | 18.00 | 33.00 | 67.00 | 124.00 | 203.00 |
| 0.15 | 3.209 | 0.3224310 | 0.0286744 | 0.80 | 1.20 | 18.578 | 12.023 | 7.00  | 10.00 | 15.00 | 24.00  | 34.00  | 3.387 | 20.271  | 13.329  | 8.00  | 11.00 | 17.00 | 26.00  | 38.00  |
| 0.15 | 3.209 | 0.3224310 | 0.0286744 | 0.70 | 1.20 | 8.807  | 3.933  | 5.00  | 6.00  | 8.00  | 11.00  | 14.00  | 3.387 | 9.338   | 4.171   | 5.00  | 6.00  | 8.00  | 11.00  | 15.00  |
| 0.15 | 3.209 | 0.3224310 | 0.0286744 | 0.60 | 1.20 | 5.629  | 1.927  | 4.00  | 4.00  | 5.00  | 7.00   | 8.00   | 3.387 | 5.882   | 2.002   | 4.00  | 4.00  | 6.00  | 7.00   | 9.00   |
| 0.15 | 3.209 | 0.3224310 | 0.0286744 | 0.50 | 1.20 | 4.100  | 1.108  | 3.00  | 3.00  | 4.00  | 5.00   | 6.00   | 3.387 | 4.275   | 1.155   | 3.00  | 3.00  | 4.00  | 5.00   | 6.00   |
| 0.15 | 3.209 | 0.3224310 | 0.0286744 | 1.10 | 1.30 | 59.872 | 53.527 | 12.00 | 22.00 | 43.00 | 80.00  | 130.00 | 3.387 | 69.530  | 62.411  | 14.00 | 26.00 | 50.00 | 93.00  | 150.00 |
| 0.15 | 3.209 | 0.3224310 | 0.0286744 | 1.20 | 1.30 | 20.030 | 14.173 | 7.00  | 10.00 | 16.00 | 26.00  | 38.00  | 3.387 | 22.383  | 15.815  | 8.00  | 11.00 | 18.00 | 29.00  | 43.00  |
| 0.15 | 3.209 | 0.3224310 | 0.0286744 | 1.30 | 1.30 | 10.570 | 5.799  | 5.00  | 6.00  | 9.00  | 13.00  | 18.00  | 3.387 | 11.344  | 6.191   | 5.00  | 7.00  | 10.00 | 14.00  | 20.00  |
| 0.15 | 3.209 | 0.3224310 | 0.0286744 | 1.40 | 1.30 | 7.096  | 3.160  | 4.00  | 5.00  | 7.00  | 9.00   | 11.00  | 3.387 | 7.539   | 3.417   | 4.00  | 5.00  | 7.00  | 9.00   | 12.00  |
| 0.15 | 3.209 | 0.3224310 | 0.0286744 | 0.90 | 1.30 | 69.470 | 61.524 | 14.00 | 26.00 | 51.00 | 95.00  | 149.00 | 3.387 | 85.633  | 77.407  | 17.00 | 30.00 | 62.00 | 116.00 | 187.00 |
| 0.15 | 3.209 | 0.3224310 | 0.0286744 | 0.80 | 1.30 | 18.205 | 11.501 | 7.00  | 10.00 | 15.00 | 23.00  | 33.00  | 3.387 | 20.051  | 12.928  | 8.00  | 11.00 | 17.00 | 25.00  | 37.00  |
| 0.15 | 3.209 | 0.3224310 | 0.0286744 | 0.70 | 1.30 | 8.821  | 3.997  | 5.00  | 6.00  | 8.00  | 11.00  | 14.00  | 3.387 | 9.260   | 4.188   | 5.00  | 6.00  | 8.00  | 11.00  | 15.00  |
| 0.15 | 3.209 | 0.3224310 | 0.0286744 | 0.60 | 1.30 | 5.636  | 1.926  | 4.00  | 4.00  | 5.00  | 7.00   | 8.00   | 3.387 | 5.909   | 2.014   | 4.00  | 4.00  | 6.00  | 7.00   | 9.00   |
| 0.15 | 3.209 | 0.3224310 | 0.0286744 | 0.50 | 1.30 | 4.113  | 1.120  | 3.00  | 3.00  | 4.00  | 5.00   | 6.00   | 3.387 | 4.276   | 1.156   | 3.00  | 3.00  | 4.00  | 5.00   | 6.00   |
| 0.15 | 3.209 | 0.3224310 | 0.0286744 | 1.10 | 1.40 | 54.049 | 46.365 | 12.00 | 21.00 | 40.00 | 72.00  | 114.10 | 3.387 | 65.097  | 56.906  | 13.00 | 24.00 | 48.00 | 88.00  | 140.00 |
| 0.15 | 3.209 | 0.3224310 | 0.0286744 | 1.20 | 1.40 | 19.947 | 13.588 | 7.00  | 10.00 | 16.00 | 26.00  | 38.00  | 3.387 | 21.880  | 15.404  | 7.00  | 11.00 | 18.00 | 28.00  | 41.00  |
| 0.15 | 3.209 | 0.3224310 | 0.0286744 | 1.30 | 1.40 | 10.535 | 5.723  | 5.00  | 6.00  | 9.00  | 13.00  | 18.00  | 3.387 | 11.354  | 6.211   | 5.00  | 7.00  | 10.00 | 14.00  | 19.00  |
| 0.15 | 3.209 | 0.3224310 | 0.0286744 | 1.40 | 1.40 | 7.122  | 3.212  | 4.00  | 5.00  | 6.00  | 9.00   | 11.00  | 3.387 | 7.478   | 3.401   | 4.00  | 5.00  | 7.00  | 9.00   | 12.00  |
| 0.15 | 3.209 | 0.3224310 | 0.0286744 | 0.90 | 1.40 | 62.226 | 54.376 | 13.00 | 23.00 | 46.00 | 84.00  | 133.00 | 3.387 | 78.685  | 71.177  | 16.00 | 29.00 | 57.00 | 106.00 | 171.00 |
| 0.15 | 3.209 | 0.3224310 | 0.0286744 | 0.80 | 1.40 | 18.151 | 11.693 | 7.00  | 10.00 | 15.00 | 23.00  | 33.00  | 3.387 | 19.988  | 13.003  | 8.00  | 11.00 | 16.00 | 25.00  | 37.00  |
| 0.15 | 3.209 | 0.3224310 | 0.0286744 | 0.70 | 1.40 | 8.717  | 3.840  | 5.00  | 6.00  | 8.00  | 11.00  | 14.00  | 3.387 | 9.285   | 4.192   | 5.00  | 6.00  | 8.00  | 11.00  | 15.00  |
| 0.15 | 3.209 | 0.3224310 | 0.0286744 | 0.60 | 1.40 | 5.572  | 1.879  | 4.00  | 4.00  | 5.00  | 7.00   | 8.00   | 3.387 | 5.872   | 1.978   | 4.00  | 4.00  | 5.00  | 7.00   | 8.00   |
| 0.15 | 3.209 | 0.3224310 | 0.0286744 | 0.50 | 1.40 | 4.114  | 1.114  | 3.00  | 3.00  | 4.00  | 5.00   | 6.00   | 3.387 | 4.291   | 1.146   | 3.00  | 3.00  | 4.00  | 5.00   | 6.00   |
| 0.15 | 3.209 | 0.3224310 | 0.0286744 | 1.10 | 0.90 | 74.240 | 67.719 | 14.00 | 26.00 | 53.00 | 99.00  | 165.00 | 3.387 | 86.283  | 80.196  | 16.00 | 31.00 | 61.00 | 116.25 | 188.00 |
| 0.15 | 3.209 | 0.3224310 | 0.0286744 | 1.20 | 0.90 | 21.063 | 14.979 | 7.00  | 10.00 | 17.00 | 27.00  | 41.00  | 3.387 | 23.103  | 16.576  | 8.00  | 11.00 | 18.00 | 30.00  | 45.00  |
| 0.15 | 3.209 | 0.3224310 | 0.0286744 | 1.30 | 0.90 | 10.740 | 5.929  | 5.00  | 7.00  | 9.00  | 13.00  | 19.00  | 3.387 | 11.444  | 6.389   | 5.00  | 7.00  | 10.00 | 14.00  | 20.00  |
| 0.15 | 3.209 | 0.3224310 | 0.0286744 | 1.40 | 0.90 | 7.145  | 3.242  | 4.00  | 5.00  | 7.00  | 9.00   | 11.00  | 3.387 | 7.557   | 3.488   | 4.00  | 5.00  | 7.00  | 9.00   | 12.00  |
| 0.15 | 3.209 | 0.3224310 | 0.0286744 | 0.90 | 0.90 | 91.444 | 82.201 | 17.00 | 33.00 | 67.00 | 125.00 | 198.00 | 3.387 | 112.457 | 104.117 | 20.00 | 39.00 | 81.00 | 150.00 | 248.00 |
| 0.15 | 3.209 | 0.3224310 | 0.0286744 | 0.80 | 0.90 | 19.124 | 12.086 | 7.00  | 11.00 | 16.00 | 24.00  | 35.00  | 3.387 | 20.866  | 13.813  | 8.00  | 11.00 | 17.00 | 26.00  | 39.00  |
| 0.15 | 3.209 | 0.3224310 | 0.0286744 | 0.70 | 0.90 | 8.826  | 3.966  | 5.00  | 6.00  | 8.00  | 11.00  | 14.00  | 3.387 | 9.344   | 4.194   | 5.00  | 6.00  | 8.00  | 11.00  | 15.00  |
| 0.15 | 3.209 | 0.3224310 | 0.0286744 | 0.60 | 0.90 | 5.649  | 1.930  | 4.00  | 4.00  | 5.00  | 7.00   | 8.00   | 3.387 | 5.857   | 1.982   | 4.00  | 4.00  | 5.00  | 7.00   | 8.00   |
| 0.15 | 3.209 | 0.3224310 | 0.0286744 | 0.50 | 0.90 | 4.132  | 1.102  | 3.00  | 3.00  | 4.00  | 5.00   | 6.00   | 3.387 | 4.281   | 1.144   | 3.00  | 3.00  | 4.00  | 5.00   | 6.00   |
| 0.15 | 3.209 | 0.3224310 | 0.0286744 | 1.10 | 0.80 | 75.036 | 68.085 | 14.00 | 27.00 | 54.00 | 102.00 | 163.00 | 3.387 | 88.557  | 80.962  | 16.00 | 31.00 | 64.00 | 119.00 | 195.00 |
| 0.15 | 3.209 | 0.3224310 | 0.0286744 | 1.20 | 0.80 | 21.200 | 15.103 | 7.00  | 11.00 | 17.00 | 27.00  | 41.00  | 3.387 | 23.301  | 17.334  | 8.00  | 11.00 | 18.00 | 30.00  | 45.00  |
| 0.15 | 3.209 | 0.3224310 | 0.0286744 | 1.30 | 0.80 | 10.653 | 5.997  | 5.00  | 7.00  | 9.00  | 13.00  | 18.00  | 3.387 | 11.422  | 6.345   | 5.00  | 7.00  | 10.00 | 14.00  | 20.00  |
| 0.15 | 3.209 | 0.3224310 | 0.0286744 | 1.40 | 0.80 | 7.122  | 3.227  | 4.00  | 5.00  | 6.00  | 9.00   | 11.00  | 3.387 | 7.470   | 3.392   | 4.00  | 5.00  | 7.00  | 9.00   | 12.00  |
| 0.15 | 3.209 | 0.3224310 | 0.0286744 | 0.90 | 0.80 | 93.526 | 84.537 | 18.00 | 33.00 | 68.00 | 128.00 | 204.00 | 3.387 | 113.968 | 103.603 | 20.00 | 39.00 | 82.00 | 155.00 | 254.00 |
| 0.15 | 3.209 | 0.3224310 | 0.0286744 | 0.80 | 0.80 | 19.019 | 12.116 | 7.00  | 10.00 | 16.00 | 24.00  | 34.00  | 3.387 | 20.939  | 14.096  | 8.00  | 11.00 | 17.00 | 27.00  | 39.00  |
| 0.15 | 3.209 | 0.3224310 | 0.0286744 | 0.70 | 0.80 | 8.814  | 4.006  | 5.00  | 6.00  | 8.00  | 11.00  | 14.00  | 3.387 | 9.362   | 4.277   | 5.00  | 6.00  | 8.00  | 11.00  | 15.00  |
| 0.15 | 3.209 | 0.3224310 | 0.0286744 | 0.60 | 0.80 | 5.610  | 1.889  | 4.00  | 4.00  | 5.00  | 7.00   | 8.00   | 3.387 | 5.899   | 2.012   | 4.00  | 4.00  | 6.00  | 7.00   | 9.00   |
| 0.15 | 3.209 | 0.3224310 | 0.0286744 | 0.50 | 0.80 | 4.129  | 1.138  | 3.00  | 3.00  | 4.00  | 5.00   | 6.00   | 3.387 | 4.300   | 1.150   | 3.00  | 3.00  | 4.00  | 5.00   | 6.00   |
| 0.15 | 3.209 | 0.3224310 | 0.0286744 | 1.10 | 0.70 | 76.018 | 68.305 | 14.00 | 28.00 | 55.00 | 103.00 | 164.00 | 3.387 | 91.034  | 84.342  | 16.00 | 32.00 | 66.00 | 123.00 | 197.00 |
| 0.15 | 3.209 | 0.3224310 | 0.0286744 | 1.20 | 0.70 | 21.056 | 14.799 | 7.00  | 11.00 | 17.00 | 27.00  | 40.00  | 3.387 | 23.263  | 17.086  | 8.00  | 11.00 | 19.00 | 30.00  | 45.00  |
| 0.15 | 3.209 | 0.3224310 | 0.0286744 | 1.30 | 0.70 | 10.643 | 5.900  | 5.00  | 7.00  | 9.00  | 13.00  | 18.00  | 3.387 | 11.415  | 6.301   | 5.00  | 7.00  | 10.00 | 14.00  | 20.00  |
| 0.15 | 3.209 | 0.3224310 | 0.0286744 | 1.40 | 0.70 | 7.156  | 3.260  | 4.00  | 5.00  | 6.00  | 9.00   | 11.00  | 3.387 | 7.510   | 3.442   | 4.00  | 5.00  | 7.00  | 9.00   | 12.00  |
| 0.15 | 3.209 | 0.3224310 | 0.0286744 | 0.90 | 0.70 | 96.806 | 88.925 | 18.00 | 34.00 | 70.00 | 130.00 | 212.00 | 3.387 | 117.767 | 108.717 | 21.00 | 41.00 | 85.00 | 160.00 | 256.00 |
| 0.15 | 3.209 | 0.3224310 | 0.0286744 | 0.80 | 0.70 | 18.862 | 12.232 | 7.00  | 10.00 | 15.00 | 24.00  | 35.00  | 3.387 | 20.958  | 13.919  | 8.00  | 11.00 | 17.00 | 27.00  | 39.00  |
| 0.15 | 3.209 | 0.3224310 | 0.0286744 | 0.70 | 0.70 | 8.867  | 4.105  | 5.00  | 6.00  | 8.00  | 11.00  | 14.00  | 3.387 | 9.394   | 4.292   | 5.00  | 6.00  | 8.00  | 11.00  | 15.00  |
| 0.15 | 3.209 | 0.3224310 | 0.0286744 | 0.60 | 0.70 | 5.632  | 1.907  | 4.00  | 4.00  | 5.00  | 7.00   | 8.00   | 3.387 | 5.885   | 1.970   | 4.00  | 4.00  | 6.00  | 7.00   | 8.00   |
| 0.15 | 3.209 | 0.3224310 | 0.0286744 | 0.50 | 0.70 | 4.106  | 1.102  | 3.00  | 3.00  | 4.00  | 5.00   | 6.00   | 3.387 | 4       |         |       |       |       |        |        |

|      |       |           |           |      |      |        |        |       |       |       |        |        |       |         |         |       |       |       |        |        |
|------|-------|-----------|-----------|------|------|--------|--------|-------|-------|-------|--------|--------|-------|---------|---------|-------|-------|-------|--------|--------|
| 0.15 | 3.209 | 0.3224310 | 0.0286744 | 0.80 | 0.60 | 18.775 | 12.086 | 7.00  | 10.00 | 16.00 | 24.00  | 35.00  | 3.387 | 20.816  | 13.807  | 8.00  | 11.00 | 17.00 | 26.00  | 38.00  |
| 0.15 | 3.209 | 0.3224310 | 0.0286744 | 0.70 | 0.60 | 8.871  | 4.035  | 5.00  | 6.00  | 8.00  | 11.00  | 14.00  | 3.387 | 9.369   | 4.290   | 5.00  | 6.00  | 8.00  | 11.00  | 15.00  |
| 0.15 | 3.209 | 0.3224310 | 0.0286744 | 0.60 | 0.60 | 5.619  | 1.904  | 4.00  | 4.00  | 5.00  | 7.00   | 8.00   | 3.387 | 5.851   | 1.982   | 4.00  | 4.00  | 5.00  | 7.00   | 8.00   |
| 0.15 | 3.209 | 0.3224310 | 0.0286744 | 0.50 | 0.60 | 4.120  | 1.114  | 3.00  | 3.00  | 4.00  | 5.00   | 6.00   | 3.387 | 4.282   | 1.155   | 3.00  | 3.00  | 4.00  | 5.00   | 6.00   |
| 0.15 | 3.209 | 0.3224310 | 0.0286744 | 1.10 | 0.50 | 76.623 | 69.091 | 15.00 | 28.00 | 56.00 | 103.00 | 167.00 | 3.387 | 89.966  | 83.125  | 16.00 | 31.00 | 65.00 | 121.00 | 198.00 |
| 0.15 | 3.209 | 0.3224310 | 0.0286744 | 1.20 | 0.50 | 20.847 | 15.071 | 7.00  | 10.00 | 17.00 | 27.00  | 40.00  | 3.387 | 23.230  | 16.612  | 8.00  | 11.00 | 19.00 | 30.00  | 46.00  |
| 0.15 | 3.209 | 0.3224310 | 0.0286744 | 1.30 | 0.50 | 10.603 | 5.798  | 5.00  | 6.00  | 9.00  | 13.00  | 18.00  | 3.387 | 11.466  | 6.432   | 5.00  | 7.00  | 10.00 | 14.00  | 20.00  |
| 0.15 | 3.209 | 0.3224310 | 0.0286744 | 1.40 | 0.50 | 7.120  | 3.228  | 4.00  | 5.00  | 6.00  | 9.00   | 11.00  | 3.387 | 7.499   | 3.413   | 4.00  | 5.00  | 7.00  | 9.00   | 12.00  |
| 0.15 | 3.209 | 0.3224310 | 0.0286744 | 0.90 | 0.50 | 95.832 | 86.722 | 18.00 | 34.00 | 69.00 | 128.00 | 210.00 | 3.387 | 118.863 | 108.674 | 21.00 | 41.00 | 85.00 | 160.00 | 264.00 |
| 0.15 | 3.209 | 0.3224310 | 0.0286744 | 0.80 | 0.50 | 19.053 | 12.552 | 7.00  | 10.00 | 16.00 | 24.00  | 35.00  | 3.387 | 21.036  | 13.993  | 8.00  | 11.00 | 17.00 | 27.00  | 39.00  |
| 0.15 | 3.209 | 0.3224310 | 0.0286744 | 0.70 | 0.50 | 8.894  | 4.008  | 5.00  | 6.00  | 8.00  | 11.00  | 14.00  | 3.387 | 9.420   | 4.373   | 5.00  | 6.00  | 8.00  | 11.00  | 15.00  |
| 0.15 | 3.209 | 0.3224310 | 0.0286744 | 0.60 | 0.50 | 5.629  | 1.934  | 4.00  | 4.00  | 5.00  | 7.00   | 8.00   | 3.387 | 5.915   | 2.052   | 4.00  | 4.00  | 6.00  | 7.00   | 9.00   |
| 0.15 | 3.209 | 0.3224310 | 0.0286744 | 0.50 | 0.50 | 4.115  | 1.122  | 3.00  | 3.00  | 4.00  | 5.00   | 6.00   | 3.387 | 4.287   | 1.159   | 3.00  | 3.00  | 4.00  | 5.00   | 6.00   |

Case 4  
φ=31

|      |       |           |           |      |      |         |        |       |       |       |        |        |       |         |         |       |       |       |        |        |
|------|-------|-----------|-----------|------|------|---------|--------|-------|-------|-------|--------|--------|-------|---------|---------|-------|-------|-------|--------|--------|
| 0.05 | 2.709 | 0.1808844 | 0.0091702 | 1.10 | 1.10 | 96.598  | 80.789 | 24.00 | 40.00 | 73.00 | 129.00 | 200.00 | 2.910 | 111.768 | 96.594  | 26.00 | 44.00 | 83.00 | 149.00 | 235.10 |
| 0.05 | 2.709 | 0.1808844 | 0.0091702 | 1.20 | 1.10 | 37.083  | 23.668 | 14.00 | 20.00 | 31.00 | 47.00  | 68.00  | 2.910 | 40.958  | 26.699  | 15.00 | 22.00 | 34.00 | 53.00  | 75.00  |
| 0.05 | 2.709 | 0.1808844 | 0.0091702 | 1.30 | 1.10 | 21.813  | 11.068 | 10.00 | 14.00 | 19.00 | 27.00  | 36.00  | 2.910 | 23.315  | 11.957  | 11.00 | 15.00 | 21.00 | 29.00  | 39.00  |
| 0.05 | 2.709 | 0.1808844 | 0.0091702 | 1.40 | 1.10 | 15.173  | 6.552  | 8.00  | 10.00 | 14.00 | 18.00  | 24.00  | 2.910 | 16.009  | 6.835   | 9.00  | 11.00 | 15.00 | 20.00  | 25.00  |
| 0.05 | 2.709 | 0.1808844 | 0.0091702 | 0.90 | 1.10 | 101.405 | 82.123 | 27.00 | 44.00 | 77.00 | 133.00 | 207.00 | 2.910 | 121.642 | 98.895  | 31.00 | 52.00 | 93.00 | 162.00 | 251.00 |
| 0.05 | 2.709 | 0.1808844 | 0.0091702 | 0.80 | 1.10 | 33.775  | 19.321 | 15.00 | 20.00 | 29.00 | 42.00  | 58.00  | 2.910 | 37.658  | 21.788  | 16.00 | 22.00 | 32.00 | 47.00  | 66.00  |
| 0.05 | 2.709 | 0.1808844 | 0.0091702 | 0.70 | 1.10 | 18.335  | 7.631  | 10.00 | 13.00 | 17.00 | 22.00  | 28.00  | 2.910 | 19.603  | 8.203   | 11.00 | 14.00 | 18.00 | 24.00  | 30.00  |
| 0.05 | 2.709 | 0.1808844 | 0.0091702 | 0.60 | 1.10 | 12.276  | 3.991  | 8.00  | 9.00  | 12.00 | 14.00  | 17.00  | 2.910 | 12.896  | 4.137   | 8.00  | 10.00 | 12.00 | 15.00  | 18.00  |
| 0.05 | 2.709 | 0.1808844 | 0.0091702 | 0.50 | 1.10 | 9.048   | 2.393  | 6.00  | 7.00  | 9.00  | 10.00  | 12.00  | 2.910 | 9.525   | 2.476   | 7.00  | 8.00  | 9.00  | 11.00  | 13.00  |
| 0.05 | 2.709 | 0.1808844 | 0.0091702 | 1.10 | 1.20 | 85.280  | 69.555 | 22.00 | 36.00 | 65.00 | 112.00 | 175.00 | 2.910 | 99.723  | 82.148  | 25.00 | 42.00 | 76.00 | 132.00 | 204.00 |
| 0.05 | 2.709 | 0.1808844 | 0.0091702 | 1.20 | 1.20 | 36.554  | 22.751 | 14.00 | 21.00 | 31.00 | 46.00  | 66.00  | 2.910 | 40.350  | 25.707  | 15.00 | 22.00 | 34.00 | 52.00  | 74.00  |
| 0.05 | 2.709 | 0.1808844 | 0.0091702 | 1.30 | 1.20 | 21.494  | 10.801 | 10.00 | 14.00 | 19.00 | 27.00  | 36.00  | 2.910 | 22.858  | 11.547  | 11.00 | 15.00 | 20.00 | 28.00  | 38.00  |
| 0.05 | 2.709 | 0.1808844 | 0.0091702 | 1.40 | 1.20 | 15.152  | 6.571  | 8.00  | 10.00 | 14.00 | 18.00  | 24.00  | 2.910 | 16.092  | 6.908   | 9.00  | 11.00 | 15.00 | 20.00  | 25.00  |
| 0.05 | 2.709 | 0.1808844 | 0.0091702 | 0.90 | 1.20 | 90.023  | 71.082 | 25.00 | 40.00 | 69.00 | 119.00 | 183.00 | 2.910 | 106.868 | 86.479  | 28.00 | 46.00 | 81.00 | 140.00 | 219.00 |
| 0.05 | 2.709 | 0.1808844 | 0.0091702 | 0.80 | 1.20 | 33.298  | 18.837 | 15.00 | 20.00 | 29.00 | 42.00  | 58.00  | 2.910 | 36.144  | 20.437  | 16.00 | 22.00 | 31.00 | 45.00  | 63.00  |
| 0.05 | 2.709 | 0.1808844 | 0.0091702 | 0.70 | 1.20 | 18.055  | 7.576  | 10.00 | 13.00 | 16.00 | 22.00  | 28.00  | 2.910 | 19.428  | 8.073   | 11.00 | 14.00 | 18.00 | 23.00  | 30.00  |
| 0.05 | 2.709 | 0.1808844 | 0.0091702 | 0.60 | 1.20 | 12.196  | 4.014  | 8.00  | 9.00  | 11.00 | 14.00  | 17.00  | 2.910 | 12.917  | 4.233   | 8.00  | 10.00 | 12.00 | 15.00  | 18.00  |
| 0.05 | 2.709 | 0.1808844 | 0.0091702 | 0.50 | 1.20 | 9.051   | 2.347  | 6.00  | 7.00  | 9.00  | 10.00  | 12.00  | 2.910 | 9.531   | 2.516   | 7.00  | 8.00  | 9.00  | 11.00  | 13.00  |
| 0.05 | 2.709 | 0.1808844 | 0.0091702 | 1.10 | 1.30 | 75.482  | 59.107 | 20.00 | 34.00 | 58.00 | 99.00  | 152.00 | 2.910 | 87.628  | 68.694  | 24.00 | 38.00 | 68.00 | 116.00 | 177.00 |
| 0.05 | 2.709 | 0.1808844 | 0.0091702 | 1.20 | 1.30 | 35.488  | 21.963 | 14.00 | 20.00 | 30.00 | 45.00  | 64.00  | 2.910 | 39.031  | 24.565  | 15.00 | 22.00 | 33.00 | 49.00  | 71.00  |
| 0.05 | 2.709 | 0.1808844 | 0.0091702 | 1.30 | 1.30 | 21.298  | 10.682 | 10.00 | 14.00 | 19.00 | 27.00  | 36.00  | 2.910 | 22.725  | 11.499  | 11.00 | 15.00 | 20.00 | 28.00  | 38.00  |
| 0.05 | 2.709 | 0.1808844 | 0.0091702 | 1.40 | 1.30 | 14.977  | 6.283  | 8.00  | 10.00 | 14.00 | 18.00  | 23.00  | 2.910 | 16.007  | 6.845   | 9.00  | 11.00 | 15.00 | 19.00  | 25.00  |
| 0.05 | 2.709 | 0.1808844 | 0.0091702 | 0.90 | 1.30 | 77.932  | 60.268 | 23.00 | 36.00 | 61.00 | 101.00 | 156.00 | 2.910 | 92.007  | 72.044  | 26.00 | 41.00 | 71.00 | 121.00 | 187.00 |
| 0.05 | 2.709 | 0.1808844 | 0.0091702 | 0.80 | 1.30 | 32.309  | 17.869 | 15.00 | 20.00 | 28.00 | 40.00  | 56.00  | 2.910 | 35.610  | 19.788  | 16.00 | 21.00 | 31.00 | 45.00  | 62.00  |
| 0.05 | 2.709 | 0.1808844 | 0.0091702 | 0.70 | 1.30 | 18.009  | 7.458  | 10.00 | 13.00 | 16.00 | 22.00  | 28.00  | 2.910 | 19.132  | 7.903   | 11.00 | 14.00 | 17.00 | 23.00  | 29.00  |
| 0.05 | 2.709 | 0.1808844 | 0.0091702 | 0.60 | 1.30 | 12.144  | 3.916  | 8.00  | 9.00  | 11.00 | 14.00  | 17.00  | 2.910 | 12.878  | 4.185   | 8.00  | 10.00 | 12.00 | 15.00  | 18.00  |
| 0.05 | 2.709 | 0.1808844 | 0.0091702 | 0.50 | 1.30 | 9.035   | 2.363  | 6.00  | 7.00  | 9.00  | 10.00  | 12.00  | 2.910 | 9.524   | 2.489   | 7.00  | 8.00  | 9.00  | 11.00  | 13.00  |
| 0.05 | 2.709 | 0.1808844 | 0.0091702 | 1.10 | 1.40 | 66.021  | 49.932 | 19.00 | 30.00 | 52.00 | 87.00  | 130.00 | 2.910 | 74.550  | 57.132  | 21.00 | 34.00 | 59.00 | 98.00  | 147.00 |
| 0.05 | 2.709 | 0.1808844 | 0.0091702 | 1.20 | 1.40 | 34.253  | 20.801 | 14.00 | 19.00 | 29.00 | 43.00  | 61.00  | 2.910 | 37.458  | 22.542  | 15.00 | 22.00 | 32.00 | 48.00  | 67.00  |
| 0.05 | 2.709 | 0.1808844 | 0.0091702 | 1.30 | 1.40 | 21.115  | 10.570 | 10.00 | 14.00 | 19.00 | 26.00  | 35.00  | 2.910 | 22.621  | 11.251  | 11.00 | 15.00 | 20.00 | 28.00  | 37.00  |
| 0.05 | 2.709 | 0.1808844 | 0.0091702 | 1.40 | 1.40 | 14.965  | 6.372  | 8.00  | 10.00 | 14.00 | 18.00  | 23.00  | 2.910 | 15.828  | 6.690   | 9.00  | 11.00 | 15.00 | 19.00  | 24.00  |
| 0.05 | 2.709 | 0.1808844 | 0.0091702 | 0.90 | 1.40 | 69.685  | 52.330 | 21.00 | 33.00 | 55.00 | 90.00  | 138.00 | 2.910 | 79.938  | 60.901  | 24.00 | 37.00 | 62.00 | 103.00 | 160.00 |
| 0.05 | 2.709 | 0.1808844 | 0.0091702 | 0.80 | 1.40 | 31.288  | 17.039 | 14.00 | 19.00 | 27.00 | 39.00  | 54.00  | 2.910 | 34.850  | 19.567  | 16.00 | 21.00 | 30.00 | 43.25  | 60.00  |
| 0.05 | 2.709 | 0.1808844 | 0.0091702 | 0.70 | 1.40 | 18.080  | 7.467  | 10.00 | 13.00 | 16.50 | 22.00  | 28.00  | 2.910 | 19.165  | 7.978   | 11.00 | 14.00 | 17.00 | 23.00  | 29.00  |
| 0.05 | 2.709 | 0.1808844 | 0.0091702 | 0.60 | 1.40 | 12.137  | 3.936  | 8.00  | 9.00  | 11.00 | 14.00  | 17.00  | 2.910 | 12.861  | 4.178   | 8.00  | 10.00 | 12.00 | 15.00  | 18.00  |
| 0.05 | 2.709 | 0.1808844 | 0.0091702 | 0.50 | 1.40 | 9.055   | 2.413  | 6.00  | 7.00  | 9.00  | 10.00  | 12.00  | 2.910 | 9.525   | 2.476   | 7.00  | 8.00  | 9.00  | 11.00  | 13.00  |
| 0.05 | 2.709 | 0.1808844 | 0.0091702 | 1.10 | 0.90 | 100.833 | 84.295 | 25.00 | 42.00 | 77.00 | 132.00 | 209.00 | 2.910 | 120.251 | 102.225 | 28.00 | 48.00 | 91.00 | 160.00 | 252.00 |
| 0.05 | 2.709 | 0.1808844 | 0.0091702 | 1.20 | 0.90 | 38.340  | 23.874 | 14.00 | 21.00 | 32.00 | 49.00  | 70.10  | 2.910 | 41.717  | 27.132  | 15.00 | 23.00 | 35.00 | 54.00  | 77.00  |
| 0.05 | 2.709 | 0.1808844 | 0.0091702 | 1.30 | 0.90 | 21.788  | 11.067 | 10.00 | 14.00 | 19.00 | 27.00  | 36.00  | 2.910 | 23.352  | 11.932  | 11.00 | 15.00 | 21.00 | 29.00  | 39.00  |
| 0.05 | 2.709 | 0.1808844 | 0.0091702 | 1.40 | 0.90 | 15.257  | 6.589  | 8.00  | 11.00 | 14.00 | 19.00  | 24.00  | 2.910 | 16.077  | 6.954   | 9.00  | 11.00 | 15.00 | 20.00  | 25.00  |
| 0.05 | 2.709 | 0.1808844 | 0.0091702 | 0.90 | 0.90 | 108.850 | 88.370 | 28.00 | 46.00 | 83.00 | 144.00 | 225.00 | 2.910 | 131.832 | 110.596 | 33.00 | 54.00 | 99.00 | 174.00 | 273.10 |
| 0.05 | 2.709 | 0.1808844 | 0.0091702 | 0.80 | 0.90 | 34.115  | 19.274 | 15.00 | 20.00 | 29.00 | 42.00  | 60.00  | 2.910 | 37.541  | 21.667  | 16.00 | 22.00 | 32.00 | 47.00  | 66.00  |

|      |       |           |           |      |      |         |         |       |        |        |        |        |       |         |         |       |        |        |        |         |
|------|-------|-----------|-----------|------|------|---------|---------|-------|--------|--------|--------|--------|-------|---------|---------|-------|--------|--------|--------|---------|
| 0.05 | 2.709 | 0.1808844 | 0.0091702 | 1.30 | 0.80 | 21.664  | 11.036  | 10.00 | 14.00  | 19.00  | 27.00  | 36.00  | 2.910 | 23.393  | 11.900  | 11.00 | 15.00  | 21.00  | 29.00  | 39.00   |
| 0.05 | 2.709 | 0.1808844 | 0.0091702 | 1.40 | 0.80 | 15.150  | 6.567   | 8.00  | 10.00  | 14.00  | 19.00  | 24.00  | 2.910 | 16.061  | 7.003   | 9.00  | 11.00  | 15.00  | 20.00  | 25.00   |
| 0.05 | 2.709 | 0.1808844 | 0.0091702 | 0.90 | 0.80 | 101.802 | 80.497  | 28.00 | 45.00  | 78.00  | 134.00 | 207.00 | 2.910 | 121.895 | 100.256 | 32.00 | 53.00  | 92.00  | 159.00 | 253.00  |
| 0.05 | 2.709 | 0.1808844 | 0.0091702 | 0.80 | 0.80 | 34.116  | 19.160  | 15.00 | 21.00  | 29.00  | 43.00  | 59.00  | 2.910 | 37.633  | 21.504  | 17.00 | 22.00  | 32.00  | 47.00  | 66.00   |
| 0.05 | 2.709 | 0.1808844 | 0.0091702 | 0.70 | 0.80 | 18.239  | 7.583   | 10.00 | 13.00  | 17.00  | 22.00  | 28.00  | 2.910 | 19.487  | 8.104   | 11.00 | 14.00  | 18.00  | 23.00  | 30.00   |
| 0.05 | 2.709 | 0.1808844 | 0.0091702 | 0.60 | 0.80 | 12.192  | 4.011   | 8.00  | 9.00   | 11.00  | 14.00  | 17.00  | 2.910 | 12.972  | 4.254   | 8.00  | 10.00  | 12.00  | 15.00  | 19.00   |
| 0.05 | 2.709 | 0.1808844 | 0.0091702 | 0.50 | 0.80 | 9.039   | 2.413   | 6.00  | 7.00   | 9.00   | 10.00  | 12.00  | 2.910 | 9.547   | 2.464   | 7.00  | 8.00   | 9.00   | 11.00  | 13.00   |
| 0.05 | 2.709 | 0.1808844 | 0.0091702 | 1.10 | 0.70 | 82.006  | 63.710  | 24.00 | 37.75  | 64.00  | 107.00 | 163.00 | 2.910 | 97.515  | 76.196  | 27.00 | 44.00  | 76.00  | 128.00 | 195.00  |
| 0.05 | 2.709 | 0.1808844 | 0.0091702 | 1.20 | 0.70 | 36.354  | 22.323  | 14.00 | 20.00  | 31.00  | 46.00  | 66.00  | 2.910 | 40.537  | 25.378  | 15.00 | 23.00  | 34.00  | 51.00  | 73.00   |
| 0.05 | 2.709 | 0.1808844 | 0.0091702 | 1.30 | 0.70 | 21.742  | 11.079  | 10.00 | 14.00  | 20.00  | 27.00  | 36.00  | 2.910 | 23.299  | 11.840  | 11.00 | 15.00  | 21.00  | 29.00  | 39.00   |
| 0.05 | 2.709 | 0.1808844 | 0.0091702 | 1.40 | 0.70 | 15.155  | 6.652   | 8.00  | 10.00  | 14.00  | 19.00  | 24.00  | 2.910 | 16.139  | 6.862   | 9.00  | 11.00  | 15.00  | 20.00  | 25.00   |
| 0.05 | 2.709 | 0.1808844 | 0.0091702 | 0.90 | 0.70 | 87.020  | 65.050  | 27.00 | 41.00  | 69.00  | 113.00 | 172.00 | 2.910 | 105.124 | 81.797  | 31.00 | 48.00  | 81.00  | 137.00 | 212.00  |
| 0.05 | 2.709 | 0.1808844 | 0.0091702 | 0.80 | 0.70 | 33.416  | 18.332  | 15.00 | 20.00  | 29.00  | 42.00  | 57.00  | 2.910 | 36.853  | 20.563  | 17.00 | 22.00  | 32.00  | 46.00  | 63.00   |
| 0.05 | 2.709 | 0.1808844 | 0.0091702 | 0.70 | 0.70 | 18.302  | 7.492   | 10.00 | 13.00  | 17.00  | 22.00  | 28.00  | 2.910 | 19.465  | 8.018   | 11.00 | 14.00  | 18.00  | 23.00  | 30.00   |
| 0.05 | 2.709 | 0.1808844 | 0.0091702 | 0.60 | 0.70 | 12.193  | 3.991   | 8.00  | 9.00   | 11.00  | 14.00  | 17.00  | 2.910 | 12.937  | 4.190   | 8.00  | 10.00  | 12.00  | 15.00  | 19.00   |
| 0.05 | 2.709 | 0.1808844 | 0.0091702 | 0.50 | 0.70 | 9.083   | 2.426   | 6.00  | 7.00   | 9.00   | 10.00  | 12.00  | 2.910 | 9.525   | 2.508   | 7.00  | 8.00   | 9.00   | 11.00  | 13.00   |
| 0.05 | 2.709 | 0.1808844 | 0.0091702 | 1.10 | 0.60 | 65.212  | 45.386  | 22.00 | 33.00  | 52.00  | 84.00  | 125.00 | 2.910 | 76.703  | 55.083  | 25.00 | 38.00  | 61.00  | 99.00  | 150.00  |
| 0.05 | 2.709 | 0.1808844 | 0.0091702 | 1.20 | 0.60 | 34.873  | 20.298  | 14.00 | 20.00  | 30.00  | 44.00  | 61.00  | 2.910 | 38.567  | 22.955  | 15.00 | 22.00  | 33.00  | 49.00  | 68.00   |
| 0.05 | 2.709 | 0.1808844 | 0.0091702 | 1.30 | 0.60 | 21.534  | 10.621  | 10.00 | 14.00  | 19.00  | 27.00  | 36.00  | 2.910 | 23.207  | 11.672  | 11.00 | 15.00  | 21.00  | 29.00  | 38.00   |
| 0.05 | 2.709 | 0.1808844 | 0.0091702 | 1.40 | 0.60 | 15.191  | 6.428   | 8.00  | 11.00  | 14.00  | 19.00  | 24.00  | 2.910 | 16.041  | 6.987   | 8.00  | 11.00  | 15.00  | 20.00  | 25.00   |
| 0.05 | 2.709 | 0.1808844 | 0.0091702 | 0.90 | 0.60 | 68.373  | 47.392  | 24.00 | 35.00  | 55.00  | 87.00  | 129.00 | 2.910 | 81.125  | 57.935  | 28.00 | 40.00  | 65.00  | 104.00 | 156.00  |
| 0.05 | 2.709 | 0.1808844 | 0.0091702 | 0.80 | 0.60 | 32.394  | 17.018  | 15.00 | 20.00  | 29.00  | 40.00  | 55.00  | 2.910 | 35.598  | 19.114  | 16.00 | 22.00  | 31.00  | 44.00  | 61.00   |
| 0.05 | 2.709 | 0.1808844 | 0.0091702 | 0.70 | 0.60 | 18.210  | 7.403   | 10.00 | 13.00  | 17.00  | 22.00  | 28.00  | 2.910 | 19.476  | 7.981   | 11.00 | 14.00  | 18.00  | 23.00  | 30.00   |
| 0.05 | 2.709 | 0.1808844 | 0.0091702 | 0.60 | 0.60 | 12.146  | 3.976   | 8.00  | 9.00   | 11.00  | 14.00  | 17.00  | 2.910 | 12.940  | 4.174   | 8.00  | 10.00  | 12.00  | 15.00  | 18.00   |
| 0.05 | 2.709 | 0.1808844 | 0.0091702 | 0.50 | 0.60 | 9.053   | 2.392   | 6.00  | 7.00   | 9.00   | 10.00  | 12.00  | 2.910 | 9.515   | 2.485   | 7.00  | 8.00   | 9.00   | 11.00  | 13.00   |
| 0.05 | 2.709 | 0.1808844 | 0.0091702 | 1.10 | 0.50 | 49.289  | 30.135  | 20.00 | 28.00  | 42.00  | 62.00  | 89.00  | 2.910 | 56.114  | 35.579  | 23.00 | 32.00  | 46.00  | 70.00  | 102.00  |
| 0.05 | 2.709 | 0.1808844 | 0.0091702 | 1.20 | 0.50 | 31.480  | 16.807  | 14.00 | 20.00  | 28.00  | 39.00  | 54.00  | 2.910 | 35.030  | 19.195  | 15.00 | 22.00  | 31.00  | 44.00  | 60.00   |
| 0.05 | 2.709 | 0.1808844 | 0.0091702 | 1.30 | 0.50 | 20.759  | 9.698   | 10.00 | 14.00  | 19.00  | 26.00  | 34.00  | 2.910 | 22.582  | 10.758  | 11.00 | 15.00  | 21.00  | 28.00  | 36.00   |
| 0.05 | 2.709 | 0.1808844 | 0.0091702 | 1.40 | 0.50 | 14.975  | 6.178   | 8.00  | 10.00  | 14.00  | 18.00  | 23.00  | 2.910 | 15.955  | 6.679   | 9.00  | 11.00  | 15.00  | 20.00  | 25.00   |
| 0.05 | 2.709 | 0.1808844 | 0.0091702 | 0.90 | 0.50 | 50.590  | 30.035  | 21.00 | 30.00  | 43.00  | 63.00  | 89.00  | 2.910 | 58.833  | 36.886  | 24.00 | 33.00  | 49.00  | 73.00  | 106.00  |
| 0.05 | 2.709 | 0.1808844 | 0.0091702 | 0.80 | 0.50 | 29.781  | 14.382  | 15.00 | 19.00  | 27.00  | 37.00  | 49.00  | 2.910 | 33.322  | 16.513  | 16.00 | 22.00  | 30.00  | 41.00  | 55.00   |
| 0.05 | 2.709 | 0.1808844 | 0.0091702 | 0.70 | 0.50 | 18.053  | 7.182   | 10.00 | 13.00  | 17.00  | 22.00  | 28.00  | 2.910 | 19.273  | 7.782   | 11.00 | 14.00  | 18.00  | 23.00  | 29.00   |
| 0.05 | 2.709 | 0.1808844 | 0.0091702 | 0.60 | 0.50 | 12.200  | 3.953   | 8.00  | 9.00   | 11.00  | 14.00  | 17.00  | 2.910 | 12.929  | 4.195   | 8.00  | 10.00  | 12.00  | 15.00  | 18.00   |
| 0.05 | 2.709 | 0.1808844 | 0.0091702 | 0.50 | 0.50 | 9.061   | 2.390   | 6.00  | 7.00   | 9.00   | 10.00  | 12.00  | 2.910 | 9.533   | 2.510   | 7.00  | 8.00   | 9.00   | 11.00  | 13.00   |
| 0.10 | 3.027 | 0.2591139 | 0.0188166 | 1.00 | 1.00 | 370.751 | 370.783 | 45.00 | 113.00 | 258.00 | 509.00 | 835.00 | 3.220 | 501.537 | 499.124 | 60.00 | 151.00 | 346.00 | 685.00 | 1157.00 |
| 0.10 | 3.027 | 0.2591139 | 0.0188166 | 1.10 | 1.10 | 106.942 | 96.658  | 20.00 | 38.00  | 78.00  | 144.00 | 231.10 | 3.220 | 129.308 | 118.874 | 23.00 | 44.00  | 93.00  | 174.00 | 283.00  |
| 0.10 | 3.027 | 0.2591139 | 0.0188166 | 1.20 | 1.10 | 40.876  | 31.950  | 11.00 | 18.00  | 32.00  | 53.00  | 83.00  | 3.220 | 46.749  | 36.866  | 13.00 | 21.00  | 36.00  | 61.00  | 95.00   |
| 0.10 | 3.027 | 0.2591139 | 0.0188166 | 1.30 | 1.10 | 21.617  | 14.353  | 8.00  | 12.00  | 18.00  | 28.00  | 40.00  | 3.220 | 23.650  | 15.397  | 9.00  | 13.00  | 20.00  | 30.00  | 43.00   |
| 0.10 | 3.027 | 0.2591139 | 0.0188166 | 1.40 | 1.10 | 14.320  | 7.810   | 6.00  | 9.00   | 13.00  | 18.00  | 24.00  | 3.220 | 15.129  | 8.279   | 7.00  | 9.00   | 13.00  | 19.00  | 26.00   |
| 0.10 | 3.027 | 0.2591139 | 0.0188166 | 0.90 | 1.10 | 140.010 | 131.147 | 26.00 | 49.00  | 100.00 | 186.00 | 306.00 | 3.220 | 181.782 | 170.853 | 30.00 | 60.75  | 130.00 | 248.00 | 402.00  |
| 0.10 | 3.027 | 0.2591139 | 0.0188166 | 0.80 | 1.10 | 39.784  | 28.780  | 13.00 | 19.00  | 32.00  | 51.00  | 77.00  | 3.220 | 46.010  | 34.590  | 15.00 | 22.00  | 36.00  | 59.00  | 89.10   |
| 0.10 | 3.027 | 0.2591139 | 0.0188166 | 0.70 | 1.10 | 18.351  | 9.877   | 9.00  | 11.00  | 16.00  | 23.00  | 31.00  | 3.220 | 19.803  | 10.958  | 9.00  | 12.00  | 17.00  | 25.00  | 34.00   |
| 0.10 | 3.027 | 0.2591139 | 0.0188166 | 0.60 | 1.10 | 11.292  | 4.721   | 6.00  | 8.00   | 10.00  | 14.00  | 18.00  | 3.220 | 11.929  | 4.916   | 7.00  | 8.00   | 11.00  | 14.00  | 18.00   |
| 0.10 | 3.027 | 0.2591139 | 0.0188166 | 0.50 | 1.10 | 7.895   | 2.572   | 5.00  | 6.00   | 7.00   | 9.00   | 11.00  | 3.220 | 8.343   | 2.721   | 5.00  | 6.00   | 8.00   | 10.00  | 12.00   |
| 0.10 | 3.027 | 0.2591139 | 0.0188166 | 1.10 | 1.20 | 94.234  | 84.279  | 18.00 | 35.00  | 69.00  | 128.00 | 202.00 | 3.220 | 112.851 | 101.818 | 20.00 | 40.00  | 81.00  | 154.00 | 247.00  |
| 0.10 | 3.027 | 0.2591139 | 0.0188166 | 1.20 | 1.20 | 39.469  | 30.781  | 11.00 | 18.00  | 31.00  | 52.00  | 78.00  | 3.220 | 45.255  | 35.724  | 13.00 | 20.00  | 35.00  | 60.00  | 91.00   |
| 0.10 | 3.027 | 0.2591139 | 0.0188166 | 1.30 | 1.20 | 21.195  | 13.371  | 8.00  | 12.00  | 18.00  | 27.00  | 39.00  | 3.220 | 23.243  | 15.267  | 9.00  | 13.00  | 19.00  | 29.00  | 43.00   |
| 0.10 | 3.027 | 0.2591139 | 0.0188166 | 1.40 | 1.20 | 14.139  | 7.517   | 6.00  | 9.00   | 12.00  | 18.00  | 24.00  | 3.220 | 15.066  | 8.214   | 7.00  | 9.00   | 13.00  | 19.00  | 26.00   |
| 0.10 | 3.027 | 0.2591139 | 0.0188166 | 0.90 | 1.20 | 122.055 | 109.313 | 23.00 | 44.00  | 90.00  | 165.00 | 264.00 | 3.220 | 154.490 | 141.476 | 27.00 | 52.00  | 111.00 | 214.00 | 339.10  |
| 0.10 | 3.027 | 0.2591139 | 0.0188166 | 0.80 | 1.20 | 38.870  | 28.043  | 13.00 | 19.00  | 31.00  | 50.00  | 75.00  | 3.220 | 44.758  | 33.108  | 14.00 | 21.75  | 35.00  | 58.00  | 88.00   |
| 0.10 | 3.027 | 0.2591139 | 0.0188166 | 0.70 | 1.20 | 18.162  | 9.965   | 9.00  | 11.00  | 16.00  | 22.00  | 31.00  | 3.220 | 19.800  | 10.970  | 9.00  | 12.00  | 17.00  | 24.00  | 34.00   |
| 0.10 | 3.027 | 0.2591139 | 0.0188166 | 0.60 | 1.20 | 11.185  | 4.583   | 6.00  | 8.00   | 10.00  | 13.00  | 17.00  | 3.220 | 11.896  | 4.988   | 7.00  | 8.00   | 11.00  | 14.00  | 18.00   |
| 0.10 | 3.027 | 0.2591139 | 0.0188166 | 0.50 | 1.20 | 7.936   | 2.602   | 5.00  | 6.00   | 7.00   | 9.00   | 11.00  | 3.220 | 8.334   | 2.699   | 5.00  | 6.00   | 8.00   | 10.00  | 12.00   |
| 0.10 | 3.027 | 0.2591139 | 0.0188166 | 1.10 | 1.30 | 83.922  | 74.107  | 17.00 | 31.00  | 62.00  | 112.00 | 181.00 | 3.220 | 99.369  | 89.833  | 19.00 | 36.00  | 72.00  | 134.00 | 218.00  |
| 0.10 | 3.027 | 0.2591139 | 0.0188166 | 1.20 | 1.30 | 37.915  | 29.265  | 11.00 | 17.00  | 30.00  | 49.00  | 76.10  | 3.220 | 43.021  | 33.591  | 12.00 | 19.00  | 33.00  | 57.00  | 88.00   |
| 0.10 | 3.027 | 0.2591139 | 0.0188166 | 1.30 | 1.30 | 21.900  | 13.462  | 8.0   |        |        |        |        |       |         |         |       |        |        |        |         |

|      |       |           |           |      |      |         |         |       |        |        |        |        |       |         |         |       |        |        |        |         |
|------|-------|-----------|-----------|------|------|---------|---------|-------|--------|--------|--------|--------|-------|---------|---------|-------|--------|--------|--------|---------|
| 0.10 | 3.027 | 0.2591139 | 0.0188166 | 1.10 | 1.40 | 71.943  | 62.787  | 16.00 | 28.00  | 53.00  | 96.00  | 154.00 | 3.220 | 87.238  | 76.692  | 18.00 | 34.00  | 65.00  | 117.00 | 185.00  |
| 0.10 | 3.027 | 0.2591139 | 0.0188166 | 1.20 | 1.40 | 35.754  | 27.071  | 11.00 | 17.00  | 28.00  | 46.00  | 71.00  | 3.220 | 40.202  | 30.786  | 12.00 | 19.00  | 32.00  | 53.00  | 81.00   |
| 0.10 | 3.027 | 0.2591139 | 0.0188166 | 1.30 | 1.40 | 20.801  | 13.224  | 8.00  | 12.00  | 17.00  | 26.00  | 38.00  | 3.220 | 22.768  | 14.471  | 9.00  | 13.00  | 19.00  | 29.00  | 41.00   |
| 0.10 | 3.027 | 0.2591139 | 0.0188166 | 1.40 | 1.40 | 13.967  | 7.574   | 6.00  | 9.00   | 12.00  | 18.00  | 24.00  | 3.220 | 15.169  | 8.159   | 7.00  | 9.00   | 13.00  | 19.00  | 26.00   |
| 0.10 | 3.027 | 0.2591139 | 0.0188166 | 0.90 | 1.40 | 85.404  | 74.649  | 18.00 | 33.00  | 62.00  | 115.00 | 183.00 | 3.220 | 106.225 | 93.744  | 21.00 | 39.00  | 78.00  | 143.00 | 231.00  |
| 0.10 | 3.027 | 0.2591139 | 0.0188166 | 0.80 | 1.40 | 35.795  | 25.452  | 12.00 | 18.00  | 29.00  | 46.00  | 68.00  | 3.220 | 41.450  | 30.086  | 14.00 | 20.00  | 33.00  | 54.00  | 81.00   |
| 0.10 | 3.027 | 0.2591139 | 0.0188166 | 0.70 | 1.40 | 17.865  | 9.397   | 9.00  | 11.00  | 16.00  | 22.00  | 30.00  | 3.220 | 19.490  | 10.475  | 9.00  | 12.00  | 17.00  | 24.00  | 33.00   |
| 0.10 | 3.027 | 0.2591139 | 0.0188166 | 0.60 | 1.40 | 11.221  | 4.675   | 6.00  | 8.00   | 10.00  | 13.00  | 17.00  | 3.220 | 11.788  | 4.891   | 7.00  | 8.00   | 11.00  | 14.00  | 18.00   |
| 0.10 | 3.027 | 0.2591139 | 0.0188166 | 0.50 | 1.40 | 7.845   | 2.535   | 5.00  | 6.00   | 7.00   | 9.00   | 11.00  | 3.220 | 8.346   | 2.713   | 5.00  | 6.00   | 8.00   | 10.00  | 12.00   |
| 0.10 | 3.027 | 0.2591139 | 0.0188166 | 1.10 | 0.90 | 123.434 | 114.048 | 22.00 | 43.00  | 88.00  | 166.00 | 272.00 | 3.220 | 148.318 | 137.907 | 25.00 | 50.00  | 107.00 | 202.00 | 331.00  |
| 0.10 | 3.027 | 0.2591139 | 0.0188166 | 1.20 | 0.90 | 41.910  | 32.978  | 12.00 | 19.00  | 32.00  | 55.00  | 85.00  | 3.220 | 47.834  | 38.392  | 13.00 | 21.00  | 37.00  | 63.00  | 97.00   |
| 0.10 | 3.027 | 0.2591139 | 0.0188166 | 1.30 | 0.90 | 22.059  | 14.384  | 8.00  | 12.00  | 19.00  | 28.00  | 40.00  | 3.220 | 23.791  | 15.647  | 9.00  | 13.00  | 20.00  | 30.00  | 44.00   |
| 0.10 | 3.027 | 0.2591139 | 0.0188166 | 1.40 | 0.90 | 14.248  | 7.799   | 6.00  | 9.00   | 12.00  | 18.00  | 24.00  | 3.220 | 15.441  | 8.574   | 7.00  | 9.00   | 13.00  | 19.00  | 27.00   |
| 0.10 | 3.027 | 0.2591139 | 0.0188166 | 0.90 | 0.90 | 173.188 | 156.896 | 30.00 | 62.00  | 126.00 | 236.00 | 376.00 | 3.220 | 230.071 | 214.124 | 36.00 | 77.00  | 168.00 | 311.00 | 502.10  |
| 0.10 | 3.027 | 0.2591139 | 0.0188166 | 0.80 | 0.90 | 41.525  | 30.629  | 13.00 | 20.00  | 32.00  | 54.00  | 81.00  | 3.220 | 47.849  | 36.434  | 15.00 | 22.00  | 37.00  | 62.00  | 96.00   |
| 0.10 | 3.027 | 0.2591139 | 0.0188166 | 0.70 | 0.90 | 18.273  | 9.903   | 9.00  | 11.00  | 16.00  | 23.00  | 31.00  | 3.220 | 20.161  | 11.176  | 9.00  | 12.00  | 17.00  | 25.00  | 35.00   |
| 0.10 | 3.027 | 0.2591139 | 0.0188166 | 0.60 | 0.90 | 11.177  | 4.642   | 6.00  | 8.00   | 10.00  | 13.00  | 17.00  | 3.220 | 11.962  | 5.002   | 7.00  | 8.00   | 11.00  | 14.00  | 18.00   |
| 0.10 | 3.027 | 0.2591139 | 0.0188166 | 0.50 | 0.90 | 7.908   | 2.590   | 5.00  | 6.00   | 7.00   | 9.00   | 11.00  | 3.220 | 8.337   | 2.733   | 5.00  | 6.00   | 8.00   | 10.00  | 12.00   |
| 0.10 | 3.027 | 0.2591139 | 0.0188166 | 1.10 | 0.80 | 124.791 | 114.565 | 22.00 | 44.00  | 90.00  | 168.00 | 274.00 | 3.220 | 153.113 | 144.986 | 25.00 | 51.00  | 108.00 | 208.25 | 342.00  |
| 0.10 | 3.027 | 0.2591139 | 0.0188166 | 1.20 | 0.80 | 42.375  | 33.185  | 12.00 | 19.00  | 33.00  | 56.00  | 86.00  | 3.220 | 48.545  | 38.938  | 13.00 | 21.00  | 38.00  | 64.00  | 99.00   |
| 0.10 | 3.027 | 0.2591139 | 0.0188166 | 1.30 | 0.80 | 22.090  | 14.371  | 8.00  | 12.00  | 18.00  | 28.00  | 41.00  | 3.220 | 23.882  | 15.579  | 9.00  | 13.00  | 20.00  | 30.00  | 44.00   |
| 0.10 | 3.027 | 0.2591139 | 0.0188166 | 1.40 | 0.80 | 14.282  | 7.738   | 6.00  | 9.00   | 12.00  | 18.00  | 24.00  | 3.220 | 15.373  | 8.519   | 7.00  | 9.00   | 13.00  | 19.00  | 26.00   |
| 0.10 | 3.027 | 0.2591139 | 0.0188166 | 0.90 | 0.80 | 175.258 | 160.708 | 30.00 | 61.00  | 128.00 | 236.00 | 386.10 | 3.220 | 241.068 | 226.551 | 39.00 | 81.00  | 174.00 | 328.00 | 533.00  |
| 0.10 | 3.027 | 0.2591139 | 0.0188166 | 0.80 | 0.80 | 41.850  | 30.733  | 14.00 | 20.00  | 33.00  | 54.00  | 81.00  | 3.220 | 48.246  | 36.051  | 15.00 | 23.00  | 38.00  | 63.00  | 95.00   |
| 0.10 | 3.027 | 0.2591139 | 0.0188166 | 0.70 | 0.80 | 18.392  | 9.958   | 8.00  | 11.00  | 16.00  | 23.00  | 31.00  | 3.220 | 20.171  | 11.221  | 9.00  | 12.00  | 17.00  | 25.00  | 34.00   |
| 0.10 | 3.027 | 0.2591139 | 0.0188166 | 0.60 | 0.80 | 11.174  | 4.565   | 6.00  | 8.00   | 10.00  | 13.00  | 17.00  | 3.220 | 11.863  | 4.895   | 7.00  | 8.00   | 11.00  | 14.00  | 18.00   |
| 0.10 | 3.027 | 0.2591139 | 0.0188166 | 0.50 | 0.80 | 7.938   | 2.632   | 5.00  | 6.00   | 7.00   | 9.00   | 11.00  | 3.220 | 8.328   | 2.736   | 5.00  | 6.00   | 8.00   | 10.00  | 12.00   |
| 0.10 | 3.027 | 0.2591139 | 0.0188166 | 1.10 | 0.70 | 119.921 | 109.568 | 22.00 | 42.00  | 86.00  | 161.00 | 264.00 | 3.220 | 149.206 | 136.692 | 26.00 | 52.00  | 106.00 | 203.25 | 331.00  |
| 0.10 | 3.027 | 0.2591139 | 0.0188166 | 1.20 | 0.70 | 42.049  | 33.217  | 12.00 | 19.00  | 32.00  | 56.00  | 85.00  | 3.220 | 48.124  | 38.190  | 13.00 | 21.00  | 37.00  | 65.00  | 97.10   |
| 0.10 | 3.027 | 0.2591139 | 0.0188166 | 1.30 | 0.70 | 22.182  | 14.281  | 8.00  | 12.00  | 19.00  | 28.00  | 41.00  | 3.220 | 24.005  | 15.727  | 9.00  | 13.00  | 20.00  | 30.00  | 45.00   |
| 0.10 | 3.027 | 0.2591139 | 0.0188166 | 1.40 | 0.70 | 14.386  | 7.860   | 6.00  | 9.00   | 12.00  | 18.00  | 25.00  | 3.220 | 15.328  | 8.445   | 7.00  | 9.00   | 13.00  | 19.00  | 26.00   |
| 0.10 | 3.027 | 0.2591139 | 0.0188166 | 0.90 | 0.70 | 171.629 | 159.499 | 31.00 | 59.00  | 123.00 | 232.00 | 375.00 | 3.220 | 228.146 | 214.217 | 37.00 | 75.00  | 162.00 | 308.00 | 510.10  |
| 0.10 | 3.027 | 0.2591139 | 0.0188166 | 0.80 | 0.70 | 41.488  | 30.237  | 14.00 | 20.00  | 33.00  | 53.00  | 79.00  | 3.220 | 48.142  | 35.461  | 15.00 | 23.00  | 38.00  | 63.00  | 95.00   |
| 0.10 | 3.027 | 0.2591139 | 0.0188166 | 0.70 | 0.70 | 18.477  | 9.925   | 9.00  | 11.75  | 16.00  | 23.00  | 31.00  | 3.220 | 20.269  | 11.323  | 9.00  | 12.00  | 17.00  | 25.00  | 35.00   |
| 0.10 | 3.027 | 0.2591139 | 0.0188166 | 0.60 | 0.70 | 11.176  | 4.654   | 6.00  | 8.00   | 10.00  | 13.00  | 17.00  | 3.220 | 11.966  | 4.942   | 7.00  | 8.00   | 11.00  | 14.00  | 18.00   |
| 0.10 | 3.027 | 0.2591139 | 0.0188166 | 0.50 | 0.70 | 7.940   | 2.611   | 5.00  | 6.00   | 7.00   | 9.00   | 11.00  | 3.220 | 8.334   | 2.729   | 5.00  | 6.00   | 8.00   | 10.00  | 12.00   |
| 0.10 | 3.027 | 0.2591139 | 0.0188166 | 1.10 | 0.60 | 106.621 | 94.158  | 22.00 | 40.00  | 78.00  | 144.00 | 230.00 | 3.220 | 135.179 | 122.847 | 25.00 | 48.00  | 98.00  | 183.00 | 294.00  |
| 0.10 | 3.027 | 0.2591139 | 0.0188166 | 1.20 | 0.60 | 41.038  | 31.976  | 12.00 | 19.00  | 32.00  | 53.00  | 82.00  | 3.220 | 47.030  | 37.342  | 13.00 | 21.00  | 36.00  | 62.00  | 95.00   |
| 0.10 | 3.027 | 0.2591139 | 0.0188166 | 1.30 | 0.60 | 21.788  | 13.885  | 8.00  | 12.00  | 18.00  | 28.00  | 40.00  | 3.220 | 23.813  | 15.694  | 9.00  | 13.00  | 20.00  | 30.00  | 44.00   |
| 0.10 | 3.027 | 0.2591139 | 0.0188166 | 1.40 | 0.60 | 14.359  | 7.861   | 6.00  | 9.00   | 13.00  | 18.00  | 25.00  | 3.220 | 15.332  | 8.476   | 7.00  | 9.00   | 13.00  | 19.00  | 26.00   |
| 0.10 | 3.027 | 0.2591139 | 0.0188166 | 0.90 | 0.60 | 140.925 | 123.644 | 28.00 | 52.00  | 103.00 | 190.00 | 309.00 | 3.220 | 191.325 | 174.757 | 35.00 | 68.00  | 136.00 | 257.00 | 423.00  |
| 0.10 | 3.027 | 0.2591139 | 0.0188166 | 0.80 | 0.60 | 40.696  | 28.454  | 14.00 | 21.00  | 33.00  | 53.00  | 79.00  | 3.220 | 47.116  | 35.204  | 15.00 | 23.00  | 37.00  | 60.00  | 92.00   |
| 0.10 | 3.027 | 0.2591139 | 0.0188166 | 0.70 | 0.60 | 18.395  | 9.894   | 9.00  | 11.00  | 16.00  | 23.00  | 31.00  | 3.220 | 20.077  | 10.963  | 9.00  | 12.00  | 17.00  | 25.00  | 35.00   |
| 0.10 | 3.027 | 0.2591139 | 0.0188166 | 0.60 | 0.60 | 11.211  | 4.668   | 6.00  | 8.00   | 10.00  | 13.00  | 17.00  | 3.220 | 11.986  | 4.985   | 7.00  | 8.00   | 11.00  | 14.00  | 18.00   |
| 0.10 | 3.027 | 0.2591139 | 0.0188166 | 0.50 | 0.60 | 7.901   | 2.566   | 5.00  | 6.00   | 7.00   | 9.00   | 11.00  | 3.220 | 8.332   | 2.757   | 5.00  | 6.00   | 8.00   | 10.00  | 12.00   |
| 0.10 | 3.027 | 0.2591139 | 0.0188166 | 1.10 | 0.50 | 81.534  | 66.732  | 20.00 | 34.00  | 63.00  | 108.00 | 168.00 | 3.220 | 106.490 | 93.449  | 23.00 | 41.00  | 79.00  | 143.00 | 225.00  |
| 0.10 | 3.027 | 0.2591139 | 0.0188166 | 1.20 | 0.50 | 38.278  | 28.224  | 12.00 | 19.00  | 31.00  | 49.25  | 74.00  | 3.220 | 44.688  | 33.853  | 13.00 | 21.00  | 35.00  | 59.00  | 88.00   |
| 0.10 | 3.027 | 0.2591139 | 0.0188166 | 1.30 | 0.50 | 21.564  | 13.439  | 8.00  | 12.00  | 18.00  | 28.00  | 39.00  | 3.220 | 23.747  | 15.105  | 9.00  | 13.00  | 20.00  | 30.00  | 43.00   |
| 0.10 | 3.027 | 0.2591139 | 0.0188166 | 1.40 | 0.50 | 14.377  | 7.716   | 6.00  | 9.00   | 13.00  | 18.00  | 25.00  | 3.220 | 15.191  | 8.187   | 7.00  | 9.00   | 13.00  | 19.00  | 26.00   |
| 0.10 | 3.027 | 0.2591139 | 0.0188166 | 0.90 | 0.50 | 97.906  | 81.730  | 25.00 | 40.00  | 74.00  | 130.00 | 203.10 | 3.220 | 139.025 | 123.039 | 30.00 | 53.00  | 100.00 | 186.00 | 298.00  |
| 0.10 | 3.027 | 0.2591139 | 0.0188166 | 0.80 | 0.50 | 38.177  | 26.051  | 14.00 | 20.00  | 31.00  | 49.00  | 72.00  | 3.220 | 44.878  | 31.741  | 15.00 | 22.00  | 36.00  | 58.00  | 86.00   |
| 0.10 | 3.027 | 0.2591139 | 0.0188166 | 0.70 | 0.50 | 18.337  | 9.735   | 9.00  | 11.00  | 16.00  | 23.00  | 31.00  | 3.220 | 20.070  | 11.020  | 9.00  | 12.00  | 17.00  | 25.00  | 34.00   |
| 0.10 | 3.027 | 0.2591139 | 0.0188166 | 0.60 | 0.50 | 11.191  | 4.614   | 6.00  | 8.00   | 10.00  | 13.00  | 17.00  | 3.220 | 11.976  | 4.924   | 7.00  | 8.00   | 11.00  | 14.00  | 19.00   |
| 0.10 | 3.027 | 0.2591139 | 0.0188166 | 0.50 | 0.50 | 7.891   | 2.570   | 5.00  | 6.00   | 7.00   | 9.00   | 11.00  | 3.220 | 8.343   | 2.705   | 5.00  | 6.00   | 8.00   | 10.00  | 12.00   |
| 0.15 | 3.238 | 0.3214631 | 0.0286840 | 1.00 | 1.00 | 370.579 | 357.945 | 45.00 | 114.00 | 262.00 | 518.25 | 838.00 | 3.424 | 501.896 | 497.806 | 59.00 | 149.00 | 347.50 | 693.00 | 1160.10 |
| 0.15 | 3.238 | 0.3214631 | 0.0286840 | 1.10 | 1.10 | 119.671 | 112.5   |       |        |        |        |        |       |         |         |       |        |        |        |         |

|      |       |           |           |      |      |         |         |       |        |        |        |        |       |         |         |       |        |        |        |         |
|------|-------|-----------|-----------|------|------|---------|---------|-------|--------|--------|--------|--------|-------|---------|---------|-------|--------|--------|--------|---------|
| 0.15 | 3.238 | 0.3214631 | 0.0286840 | 0.60 | 1.10 | 11.614  | 5.864   | 6.00  | 8.00   | 10.00  | 14.00  | 19.00  | 3.424 | 12.454  | 6.392   | 6.00  | 8.00   | 11.00  | 15.00  | 21.00   |
| 0.15 | 3.238 | 0.3214631 | 0.0286840 | 0.50 | 1.10 | 7.735   | 3.016   | 5.00  | 6.00   | 7.00   | 9.00   | 12.00  | 3.424 | 8.141   | 3.146   | 5.00  | 6.00   | 7.00   | 10.00  | 12.00   |
| 0.15 | 3.238 | 0.3214631 | 0.0286840 | 1.10 | 1.20 | 108.054 | 100.571 | 17.00 | 35.00  | 77.00  | 149.00 | 240.00 | 3.424 | 132.919 | 126.257 | 21.00 | 43.00  | 94.00  | 182.00 | 296.00  |
| 0.15 | 3.238 | 0.3214631 | 0.0286840 | 1.20 | 1.20 | 45.252  | 39.040  | 11.00 | 18.00  | 34.00  | 60.00  | 94.00  | 3.424 | 53.422  | 46.705  | 12.00 | 21.00  | 39.00  | 71.00  | 114.00  |
| 0.15 | 3.238 | 0.3214631 | 0.0286840 | 1.30 | 1.20 | 23.462  | 17.258  | 7.00  | 11.00  | 19.00  | 30.00  | 46.00  | 3.424 | 25.926  | 19.170  | 8.00  | 12.00  | 21.00  | 34.00  | 51.00   |
| 0.15 | 3.238 | 0.3214631 | 0.0286840 | 1.40 | 1.20 | 14.606  | 9.230   | 6.00  | 8.00   | 12.00  | 18.00  | 26.00  | 3.424 | 16.091  | 10.487  | 6.00  | 9.00   | 13.00  | 20.00  | 30.00   |
| 0.15 | 3.238 | 0.3214631 | 0.0286840 | 0.90 | 1.20 | 169.426 | 163.632 | 25.00 | 54.00  | 119.00 | 230.00 | 380.00 | 3.424 | 226.985 | 215.819 | 32.00 | 73.00  | 164.00 | 313.00 | 503.00  |
| 0.15 | 3.238 | 0.3214631 | 0.0286840 | 0.80 | 1.20 | 52.416  | 43.550  | 13.00 | 21.00  | 39.00  | 70.00  | 109.00 | 3.424 | 63.910  | 54.439  | 15.00 | 25.00  | 47.00  | 85.00  | 137.00  |
| 0.15 | 3.238 | 0.3214631 | 0.0286840 | 0.70 | 1.20 | 20.671  | 13.502  | 8.00  | 11.00  | 17.00  | 26.00  | 39.00  | 3.424 | 23.232  | 15.351  | 9.00  | 12.00  | 19.00  | 30.00  | 43.00   |
| 0.15 | 3.238 | 0.3214631 | 0.0286840 | 0.60 | 1.20 | 11.513  | 5.676   | 6.00  | 8.00   | 10.00  | 14.00  | 19.00  | 3.424 | 12.551  | 6.375   | 6.00  | 8.00   | 11.00  | 15.00  | 21.00   |
| 0.15 | 3.238 | 0.3214631 | 0.0286840 | 0.50 | 1.20 | 7.682   | 2.942   | 5.00  | 6.00   | 7.00   | 9.00   | 12.00  | 3.424 | 8.123   | 3.148   | 5.00  | 6.00   | 7.00   | 10.00  | 12.00   |
| 0.15 | 3.238 | 0.3214631 | 0.0286840 | 1.10 | 1.30 | 94.438  | 87.170  | 16.00 | 32.00  | 68.00  | 128.00 | 210.00 | 3.424 | 117.261 | 111.016 | 18.00 | 39.00  | 84.00  | 160.25 | 258.00  |
| 0.15 | 3.238 | 0.3214631 | 0.0286840 | 1.20 | 1.30 | 43.517  | 36.787  | 10.00 | 17.00  | 32.00  | 58.00  | 92.00  | 3.424 | 50.733  | 44.042  | 11.00 | 20.00  | 37.00  | 68.00  | 110.00  |
| 0.15 | 3.238 | 0.3214631 | 0.0286840 | 1.30 | 1.30 | 22.946  | 16.969  | 7.00  | 11.00  | 18.00  | 30.00  | 45.00  | 3.424 | 25.715  | 19.484  | 8.00  | 12.00  | 20.00  | 33.00  | 50.00   |
| 0.15 | 3.238 | 0.3214631 | 0.0286840 | 1.40 | 1.30 | 14.661  | 9.318   | 6.00  | 8.00   | 12.00  | 19.00  | 27.00  | 3.424 | 15.990  | 10.230  | 6.00  | 9.00   | 13.00  | 20.00  | 29.00   |
| 0.15 | 3.238 | 0.3214631 | 0.0286840 | 0.90 | 1.30 | 135.419 | 126.593 | 22.00 | 45.00  | 96.00  | 187.00 | 303.00 | 3.424 | 178.810 | 169.173 | 26.00 | 59.00  | 128.00 | 246.00 | 399.00  |
| 0.15 | 3.238 | 0.3214631 | 0.0286840 | 0.80 | 1.30 | 49.275  | 40.329  | 13.00 | 21.00  | 37.00  | 65.00  | 102.00 | 3.424 | 60.516  | 51.246  | 14.00 | 24.00  | 46.00  | 80.00  | 126.00  |
| 0.15 | 3.238 | 0.3214631 | 0.0286840 | 0.70 | 1.30 | 20.479  | 12.995  | 8.00  | 11.00  | 17.00  | 26.00  | 38.00  | 3.424 | 23.014  | 15.108  | 9.00  | 12.00  | 19.00  | 29.00  | 42.00   |
| 0.15 | 3.238 | 0.3214631 | 0.0286840 | 0.60 | 1.30 | 11.360  | 5.594   | 6.00  | 7.00   | 10.00  | 14.00  | 19.00  | 3.424 | 12.345  | 6.095   | 6.00  | 8.00   | 11.00  | 15.00  | 20.00   |
| 0.15 | 3.238 | 0.3214631 | 0.0286840 | 0.50 | 1.30 | 7.653   | 2.872   | 5.00  | 6.00   | 7.00   | 9.00   | 11.00  | 3.424 | 8.071   | 3.040   | 5.00  | 6.00   | 7.00   | 10.00  | 12.00   |
| 0.15 | 3.238 | 0.3214631 | 0.0286840 | 1.10 | 1.40 | 83.450  | 76.159  | 15.00 | 29.00  | 61.00  | 113.00 | 181.00 | 3.424 | 100.135 | 93.482  | 17.00 | 34.00  | 72.00  | 137.00 | 218.00  |
| 0.15 | 3.238 | 0.3214631 | 0.0286840 | 1.20 | 1.40 | 40.984  | 34.194  | 10.00 | 17.00  | 31.00  | 54.00  | 86.00  | 3.424 | 47.183  | 40.743  | 11.00 | 19.00  | 35.00  | 62.00  | 100.00  |
| 0.15 | 3.238 | 0.3214631 | 0.0286840 | 1.30 | 1.40 | 22.408  | 16.610  | 7.00  | 11.00  | 18.00  | 29.00  | 43.10  | 3.424 | 25.361  | 18.791  | 8.00  | 12.00  | 20.00  | 33.00  | 50.00   |
| 0.15 | 3.238 | 0.3214631 | 0.0286840 | 1.40 | 1.40 | 14.532  | 9.216   | 6.00  | 8.00   | 12.00  | 18.00  | 26.00  | 3.424 | 15.769  | 10.070  | 6.00  | 9.00   | 13.00  | 20.00  | 29.00   |
| 0.15 | 3.238 | 0.3214631 | 0.0286840 | 0.90 | 1.40 | 113.705 | 104.112 | 19.00 | 39.00  | 82.00  | 155.00 | 250.00 | 3.424 | 145.626 | 136.831 | 22.00 | 48.00  | 105.00 | 197.00 | 325.00  |
| 0.15 | 3.238 | 0.3214631 | 0.0286840 | 0.80 | 1.40 | 46.687  | 37.994  | 12.00 | 20.00  | 35.00  | 62.00  | 97.00  | 3.424 | 57.683  | 48.926  | 14.00 | 23.00  | 43.00  | 76.00  | 123.00  |
| 0.15 | 3.238 | 0.3214631 | 0.0286840 | 0.70 | 1.40 | 20.726  | 13.579  | 8.00  | 11.00  | 17.00  | 26.00  | 38.00  | 3.424 | 22.758  | 15.086  | 9.00  | 12.00  | 19.00  | 29.00  | 42.00   |
| 0.15 | 3.238 | 0.3214631 | 0.0286840 | 0.60 | 1.40 | 11.377  | 5.517   | 6.00  | 7.00   | 10.00  | 14.00  | 19.00  | 3.424 | 12.378  | 6.216   | 6.00  | 8.00   | 11.00  | 15.00  | 20.00   |
| 0.15 | 3.238 | 0.3214631 | 0.0286840 | 0.50 | 1.40 | 7.660   | 2.940   | 5.00  | 6.00   | 7.00   | 9.00   | 12.00  | 3.424 | 8.200   | 3.145   | 5.00  | 6.00   | 8.00   | 10.00  | 12.00   |
| 0.15 | 3.238 | 0.3214631 | 0.0286840 | 1.10 | 0.90 | 142.330 | 136.700 | 20.00 | 45.00  | 101.00 | 195.00 | 321.00 | 3.424 | 173.484 | 164.005 | 26.00 | 57.00  | 123.00 | 238.25 | 388.00  |
| 0.15 | 3.238 | 0.3214631 | 0.0286840 | 1.20 | 0.90 | 49.941  | 44.080  | 11.00 | 19.00  | 36.00  | 67.00  | 109.00 | 3.424 | 57.212  | 50.271  | 12.00 | 22.00  | 42.00  | 77.00  | 122.00  |
| 0.15 | 3.238 | 0.3214631 | 0.0286840 | 1.30 | 0.90 | 24.535  | 18.495  | 7.00  | 12.00  | 19.00  | 32.00  | 49.00  | 3.424 | 27.018  | 20.532  | 8.00  | 13.00  | 21.00  | 35.00  | 53.00   |
| 0.15 | 3.238 | 0.3214631 | 0.0286840 | 1.40 | 0.90 | 15.020  | 9.703   | 6.00  | 8.00   | 13.00  | 19.00  | 28.00  | 3.424 | 16.074  | 10.502  | 6.00  | 9.00   | 13.00  | 20.00  | 30.00   |
| 0.15 | 3.238 | 0.3214631 | 0.0286840 | 0.90 | 0.90 | 277.171 | 270.760 | 36.00 | 86.00  | 194.00 | 381.00 | 628.00 | 3.424 | 387.704 | 387.665 | 49.00 | 117.00 | 270.00 | 530.25 | 880.00  |
| 0.15 | 3.238 | 0.3214631 | 0.0286840 | 0.80 | 0.90 | 58.955  | 50.687  | 14.00 | 24.00  | 43.00  | 78.00  | 123.00 | 3.424 | 71.544  | 61.340  | 16.00 | 28.00  | 53.00  | 96.00  | 151.00  |
| 0.15 | 3.238 | 0.3214631 | 0.0286840 | 0.70 | 0.90 | 21.325  | 14.063  | 8.00  | 12.00  | 17.00  | 27.00  | 39.00  | 3.424 | 24.033  | 16.196  | 9.00  | 13.00  | 20.00  | 30.00  | 45.00   |
| 0.15 | 3.238 | 0.3214631 | 0.0286840 | 0.60 | 0.90 | 11.524  | 5.616   | 6.00  | 8.00   | 10.00  | 14.00  | 19.00  | 3.424 | 12.590  | 6.297   | 6.00  | 8.00   | 11.00  | 15.00  | 21.00   |
| 0.15 | 3.238 | 0.3214631 | 0.0286840 | 0.50 | 0.90 | 7.670   | 2.911   | 5.00  | 6.00   | 7.00   | 9.00   | 11.00  | 3.424 | 8.178   | 3.204   | 5.00  | 6.00   | 7.00   | 10.00  | 12.00   |
| 0.15 | 3.238 | 0.3214631 | 0.0286840 | 1.10 | 0.80 | 146.268 | 141.813 | 20.00 | 46.00  | 101.50 | 200.00 | 333.00 | 3.424 | 181.457 | 175.308 | 26.00 | 58.00  | 129.00 | 247.00 | 414.00  |
| 0.15 | 3.238 | 0.3214631 | 0.0286840 | 1.20 | 0.80 | 49.728  | 43.145  | 11.00 | 19.00  | 37.00  | 67.00  | 107.00 | 3.424 | 57.547  | 49.844  | 12.00 | 22.00  | 42.00  | 78.00  | 122.00  |
| 0.15 | 3.238 | 0.3214631 | 0.0286840 | 1.30 | 0.80 | 24.482  | 18.233  | 8.00  | 12.00  | 19.00  | 32.00  | 49.00  | 3.424 | 27.223  | 20.697  | 8.00  | 13.00  | 21.00  | 35.00  | 53.00   |
| 0.15 | 3.238 | 0.3214631 | 0.0286840 | 1.40 | 0.80 | 14.906  | 9.532   | 6.00  | 8.00   | 12.00  | 19.00  | 27.00  | 3.424 | 16.099  | 10.415  | 6.00  | 9.00   | 13.00  | 20.00  | 30.00   |
| 0.15 | 3.238 | 0.3214631 | 0.0286840 | 0.90 | 0.80 | 306.693 | 297.758 | 42.00 | 97.00  | 218.00 | 415.00 | 689.10 | 3.424 | 430.230 | 413.998 | 54.00 | 128.00 | 308.00 | 598.00 | 960.00  |
| 0.15 | 3.238 | 0.3214631 | 0.0286840 | 0.80 | 0.80 | 59.997  | 51.038  | 15.00 | 24.00  | 44.00  | 79.00  | 125.00 | 3.424 | 73.624  | 63.789  | 16.00 | 28.00  | 55.00  | 99.00  | 156.00  |
| 0.15 | 3.238 | 0.3214631 | 0.0286840 | 0.70 | 0.80 | 21.335  | 13.919  | 8.00  | 12.00  | 17.00  | 27.00  | 39.00  | 3.424 | 23.945  | 16.020  | 9.00  | 13.00  | 20.00  | 30.00  | 45.00   |
| 0.15 | 3.238 | 0.3214631 | 0.0286840 | 0.60 | 0.80 | 11.655  | 5.782   | 6.00  | 8.00   | 10.00  | 14.00  | 19.00  | 3.424 | 12.423  | 6.266   | 6.00  | 8.00   | 11.00  | 15.00  | 21.00   |
| 0.15 | 3.238 | 0.3214631 | 0.0286840 | 0.50 | 0.80 | 7.749   | 3.024   | 5.00  | 6.00   | 7.00   | 9.00   | 12.00  | 3.424 | 8.152   | 3.134   | 5.00  | 6.00   | 7.00   | 10.00  | 12.00   |
| 0.15 | 3.238 | 0.3214631 | 0.0286840 | 1.10 | 0.70 | 150.359 | 146.326 | 22.00 | 48.00  | 104.00 | 203.00 | 343.00 | 3.424 | 187.614 | 183.559 | 26.00 | 59.00  | 132.00 | 256.00 | 418.10  |
| 0.15 | 3.238 | 0.3214631 | 0.0286840 | 1.20 | 0.70 | 51.161  | 43.591  | 11.00 | 20.00  | 38.00  | 69.00  | 109.10 | 3.424 | 57.897  | 50.784  | 12.00 | 22.00  | 43.00  | 77.00  | 125.00  |
| 0.15 | 3.238 | 0.3214631 | 0.0286840 | 1.30 | 0.70 | 24.204  | 18.246  | 7.00  | 11.00  | 19.00  | 31.00  | 48.00  | 3.424 | 26.876  | 20.473  | 8.00  | 12.75  | 21.00  | 35.00  | 54.00   |
| 0.15 | 3.238 | 0.3214631 | 0.0286840 | 1.40 | 0.70 | 15.080  | 9.638   | 6.00  | 8.00   | 13.00  | 19.00  | 28.00  | 3.424 | 16.087  | 10.489  | 6.00  | 9.00   | 13.00  | 20.00  | 29.00   |
| 0.15 | 3.238 | 0.3214631 | 0.0286840 | 0.90 | 0.70 | 328.040 | 320.780 | 44.00 | 101.00 | 228.00 | 453.00 | 741.00 | 3.424 | 452.422 | 444.283 | 57.00 | 139.00 | 319.00 | 613.00 | 1045.00 |
| 0.15 | 3.238 | 0.3214631 | 0.0286840 | 0.80 | 0.70 | 59.772  | 50.482  | 14.00 | 24.00  | 45.00  | 79.00  | 126.00 | 3.424 | 73.228  | 63.857  | 16.00 | 28.00  | 54.00  | 97.00  | 155.00  |
| 0.15 | 3.238 | 0.3214631 | 0.0286840 | 0.70 | 0.70 | 21.398  | 14.042  | 8.00  | 12.00  | 17.00  | 27.00  | 40.00  | 3.424 | 23.971  | 16.193  | 9.00  | 13.00  | 20.00  | 30.00  | 45.00   |
| 0.15 | 3.238 | 0.3214631 | 0.0286840 | 0.60 | 0.70 | 11.475  | 5.586   | 6.00  | 7.00   | 10.00  | 14.00  | 19.00  | 3.424 | 12.462  | 6.211   | 6.00  | 8.00   | 11.00  | 15.00  | 21.00   |
| 0.15 | 3.238 | 0.3214631 | 0.0286840 | 0.50 |      |         |         |       |        |        |        |        |       |         |         |       |        |        |        |         |

|      |       |           |           |      |      |         |         |       |        |        |        |        |       |         |         |       |        |        |        |         |
|------|-------|-----------|-----------|------|------|---------|---------|-------|--------|--------|--------|--------|-------|---------|---------|-------|--------|--------|--------|---------|
| 0.15 | 3.238 | 0.3214631 | 0.0286840 | 0.70 | 0.60 | 21.666  | 14.256  | 8.00  | 12.00  | 18.00  | 28.00  | 41.00  | 3.424 | 24.087  | 16.148  | 9.00  | 13.00  | 20.00  | 31.00  | 45.00   |
| 0.15 | 3.238 | 0.3214631 | 0.0286840 | 0.60 | 0.60 | 11.621  | 5.682   | 6.00  | 8.00   | 10.00  | 14.00  | 19.00  | 3.424 | 12.491  | 6.321   | 6.00  | 8.00   | 11.00  | 15.00  | 21.00   |
| 0.15 | 3.238 | 0.3214631 | 0.0286840 | 0.50 | 0.60 | 7.698   | 2.983   | 5.00  | 6.00   | 7.00   | 9.00   | 12.00  | 3.424 | 8.194   | 3.171   | 5.00  | 6.00   | 7.00   | 10.00  | 12.00   |
| 0.15 | 3.238 | 0.3214631 | 0.0286840 | 1.10 | 0.50 | 153.778 | 147.383 | 23.00 | 50.00  | 110.00 | 208.00 | 343.00 | 3.424 | 187.497 | 177.552 | 27.00 | 60.00  | 132.00 | 262.00 | 424.10  |
| 0.15 | 3.238 | 0.3214631 | 0.0286840 | 1.20 | 0.50 | 50.637  | 43.608  | 11.00 | 20.00  | 38.00  | 68.00  | 108.00 | 3.424 | 58.639  | 50.467  | 13.00 | 22.00  | 44.00  | 79.00  | 126.00  |
| 0.15 | 3.238 | 0.3214631 | 0.0286840 | 1.30 | 0.50 | 24.489  | 18.351  | 7.00  | 12.00  | 19.00  | 32.00  | 48.00  | 3.424 | 27.156  | 20.872  | 8.00  | 13.00  | 21.00  | 35.00  | 54.00   |
| 0.15 | 3.238 | 0.3214631 | 0.0286840 | 1.40 | 0.50 | 15.009  | 9.634   | 6.00  | 8.00   | 13.00  | 19.00  | 27.00  | 3.424 | 16.367  | 10.767  | 6.00  | 9.00   | 14.00  | 21.00  | 30.00   |
| 0.15 | 3.238 | 0.3214631 | 0.0286840 | 0.90 | 0.50 | 340.322 | 331.598 | 43.00 | 103.75 | 239.00 | 469.00 | 774.00 | 3.424 | 478.555 | 461.204 | 59.00 | 149.00 | 339.00 | 663.00 | 1076.00 |
| 0.15 | 3.238 | 0.3214631 | 0.0286840 | 0.80 | 0.50 | 59.948  | 50.214  | 14.00 | 24.00  | 45.00  | 80.00  | 124.00 | 3.424 | 74.243  | 64.291  | 16.00 | 28.00  | 54.00  | 100.00 | 158.00  |
| 0.15 | 3.238 | 0.3214631 | 0.0286840 | 0.70 | 0.50 | 21.415  | 13.798  | 8.00  | 12.00  | 18.00  | 27.00  | 39.00  | 3.424 | 24.011  | 16.078  | 9.00  | 13.00  | 19.00  | 30.00  | 45.00   |
| 0.15 | 3.238 | 0.3214631 | 0.0286840 | 0.60 | 0.50 | 11.695  | 5.812   | 6.00  | 8.00   | 10.00  | 14.00  | 19.00  | 3.424 | 12.481  | 6.311   | 6.00  | 8.00   | 11.00  | 15.00  | 21.00   |
| 0.15 | 3.238 | 0.3214631 | 0.0286840 | 0.50 | 0.50 | 7.659   | 2.922   | 5.00  | 6.00   | 7.00   | 9.00   | 11.00  | 3.424 | 8.153   | 3.179   | 5.00  | 6.00   | 7.00   | 10.00  | 12.00   |

TABLE S.2. ARL Results of the Max-EWMA control chart when pure shift occurs in the shape2 parameter of beta distribution ( $\Delta_\delta \in (1.0, 1.1, 1.2, 1.3, 1.4, 0.9, 0.8, 0.7, 0.6, 0.5)$ ,  $\Delta_\alpha = 1.0$ ) when  $X \sim B(\gamma, \delta)$ ,  $T \sim UNH(\alpha, \lambda)$ ,  $\mu = 0.20$ ,  $\alpha_0 = 0.50$ ,  $\lambda_0 = 1.00$ ,  $ARL_0 \in (370, 500)$  and  $\theta_e \in (0.05, 0.10, 0.15)$

| $\theta_e$    | $K$   | $EM$      | $VM$      | $\Delta_\delta$ | $\Delta_\alpha$ | $ARL$   | $SDRL$  | $q10$ | $q25$  | $q50$  | $q75$  | $q90$  | $K$           | $ARL$   | $SDRL$  | $q10$ | $q25$  | $q50$  | $q75$  | $q90$   |
|---------------|-------|-----------|-----------|-----------------|-----------------|---------|---------|-------|--------|--------|--------|--------|---------------|---------|---------|-------|--------|--------|--------|---------|
| Case 1        |       |           |           |                 |                 |         |         |       |        |        |        |        | Case 2        |         |         |       |        |        |        |         |
| $\phi=290$    |       |           |           |                 |                 |         |         |       |        |        |        |        | $\phi=148$    |         |         |       |        |        |        |         |
| $ARL_0 = 370$ |       |           |           |                 |                 |         |         |       |        |        |        |        | $ARL_0 = 500$ |         |         |       |        |        |        |         |
| 0.05          | 2.688 | 0.1811987 | 0.0092639 | 1.00            | 1.00            | 370.013 | 352.085 | 52.00 | 114.00 | 257.00 | 512.00 | 828.10 | 2.893         | 500.757 | 490.403 | 70.00 | 156.00 | 352.50 | 677.00 | 1134.10 |
| 0.05          | 2.688 | 0.1811987 | 0.0092639 | 1.10            | 1.00            | 22.073  | 10.386  | 11.00 | 15.00  | 20.00  | 27.00  | 36.00  | 2.893         | 23.856  | 11.252  | 12.00 | 16.00  | 21.00  | 29.00  | 39.00   |
| 0.05          | 2.688 | 0.1811987 | 0.0092639 | 1.20            | 1.00            | 9.881   | 2.897   | 7.00  | 8.00   | 9.00   | 11.00  | 14.00  | 2.893         | 10.392  | 2.995   | 7.00  | 8.00   | 10.00  | 12.00  | 14.00   |
| 0.05          | 2.688 | 0.1811987 | 0.0092639 | 1.30            | 1.00            | 6.707   | 1.509   | 5.00  | 6.00   | 7.00   | 8.00   | 9.00   | 2.893         | 6.976   | 1.542   | 5.00  | 6.00   | 7.00   | 8.00   | 9.00    |
| 0.05          | 2.688 | 0.1811987 | 0.0092639 | 1.40            | 1.00            | 5.252   | 1.007   | 4.00  | 5.00   | 5.00   | 6.00   | 7.00   | 2.893         | 5.483   | 1.023   | 4.00  | 5.00   | 5.00   | 6.00   | 7.00    |
| 0.05          | 2.688 | 0.1811987 | 0.0092639 | 0.90            | 1.00            | 17.662  | 8.293   | 9.00  | 12.00  | 16.00  | 22.00  | 29.00  | 2.893         | 18.749  | 8.814   | 9.00  | 12.00  | 17.00  | 23.00  | 30.00   |
| 0.05          | 2.688 | 0.1811987 | 0.0092639 | 0.80            | 1.00            | 6.893   | 2.138   | 4.00  | 5.00   | 7.00   | 8.00   | 10.00  | 2.893         | 7.211   | 2.230   | 5.00  | 6.00   | 7.00   | 8.00   | 10.00   |
| 0.05          | 2.688 | 0.1811987 | 0.0092639 | 0.70            | 1.00            | 4.119   | 1.031   | 3.00  | 3.00   | 4.00   | 5.00   | 5.00   | 2.893         | 4.268   | 1.054   | 3.00  | 4.00   | 4.00   | 5.00   | 6.00    |
| 0.05          | 2.688 | 0.1811987 | 0.0092639 | 0.60            | 1.00            | 2.839   | 0.641   | 2.00  | 2.00   | 3.00   | 3.00   | 4.00   | 2.893         | 2.942   | 0.653   | 2.00  | 3.00   | 3.00   | 3.00   | 4.00    |
| 0.05          | 2.688 | 0.1811987 | 0.0092639 | 0.50            | 1.00            | 2.111   | 0.385   | 2.00  | 2.00   | 2.00   | 2.00   | 3.00   | 2.893         | 2.172   | 0.409   | 2.00  | 2.00   | 2.00   | 2.00   | 3.00    |
| 0.10          | 3.016 | 0.2591350 | 0.0188482 | 1.00            | 1.00            | 371.343 | 361.678 | 46.00 | 115.00 | 268.00 | 518.00 | 840.00 | 3.203         | 499.233 | 498.621 | 58.00 | 144.00 | 344.50 | 692.00 | 1142.10 |
| 0.10          | 3.016 | 0.2591350 | 0.0188482 | 1.10            | 1.00            | 23.303  | 14.291  | 9.00  | 13.00  | 20.00  | 30.00  | 42.00  | 3.203         | 25.488  | 16.047  | 10.00 | 14.00  | 21.00  | 32.00  | 46.00   |
| 0.10          | 3.016 | 0.2591350 | 0.0188482 | 1.20            | 1.00            | 8.753   | 3.191   | 5.00  | 7.00   | 8.00   | 10.00  | 13.00  | 3.203         | 9.192   | 3.353   | 6.00  | 7.00   | 9.00   | 11.00  | 14.00   |
| 0.10          | 3.016 | 0.2591350 | 0.0188482 | 1.30            | 1.00            | 5.641   | 1.544   | 4.00  | 5.00   | 5.00   | 6.00   | 8.00   | 3.203         | 5.881   | 1.578   | 4.00  | 5.00   | 6.00   | 7.00   | 8.00    |
| 0.10          | 3.016 | 0.2591350 | 0.0188482 | 1.40            | 1.00            | 4.335   | 0.979   | 3.00  | 4.00   | 4.00   | 5.00   | 6.00   | 3.203         | 4.508   | 0.988   | 3.00  | 4.00   | 4.00   | 5.00   | 6.00    |
| 0.10          | 3.016 | 0.2591350 | 0.0188482 | 0.90            | 1.00            | 17.127  | 10.098  | 7.00  | 10.00  | 15.00  | 22.00  | 30.00  | 3.203         | 18.170  | 10.918  | 8.00  | 10.00  | 15.00  | 23.00  | 33.00   |
| 0.10          | 3.016 | 0.2591350 | 0.0188482 | 0.80            | 1.00            | 5.833   | 2.151   | 3.00  | 4.00   | 5.00   | 7.00   | 9.00   | 3.203         | 6.138   | 2.255   | 4.00  | 5.00   | 6.00   | 7.00   | 9.00    |
| 0.10          | 3.016 | 0.2591350 | 0.0188482 | 0.70            | 1.00            | 3.364   | 0.985   | 2.00  | 3.00   | 3.00   | 4.00   | 5.00   | 3.203         | 3.488   | 1.010   | 2.00  | 3.00   | 3.00   | 4.00   | 5.00    |
| 0.10          | 3.016 | 0.2591350 | 0.0188482 | 0.60            | 1.00            | 2.317   | 0.572   | 2.00  | 2.00   | 2.00   | 3.00   | 3.00   | 3.203         | 2.382   | 0.592   | 2.00  | 2.00   | 2.00   | 3.00   | 3.00    |
| 0.10          | 3.016 | 0.2591350 | 0.0188482 | 0.50            | 1.00            | 1.775   | 0.467   | 1.00  | 2.00   | 2.00   | 2.00   | 2.00   | 3.203         | 1.837   | 0.448   | 1.00  | 2.00   | 2.00   | 2.00   | 2.00    |
| 0.15          | 3.194 | 0.3222067 | 0.0286625 | 1.00            | 1.00            | 370.240 | 360.482 | 43.00 | 110.00 | 261.50 | 512.00 | 841.00 | 3.375         | 500.340 | 488.797 | 56.90 | 146.00 | 345.00 | 688.00 | 1135.10 |
| 0.15          | 3.194 | 0.3222067 | 0.0286625 | 1.10            | 1.00            | 27.010  | 19.563  | 9.00  | 13.00  | 22.00  | 35.00  | 53.00  | 3.375         | 30.887  | 22.965  | 10.00 | 15.00  | 24.00  | 40.00  | 60.00   |
| 0.15          | 3.194 | 0.3222067 | 0.0286625 | 1.20            | 1.00            | 8.572   | 3.722   | 5.00  | 6.00   | 8.00   | 10.00  | 13.00  | 3.375         | 9.035   | 3.940   | 5.00  | 6.00   | 8.00   | 11.00  | 14.00   |
| 0.15          | 3.194 | 0.3222067 | 0.0286625 | 1.30            | 1.00            | 5.237   | 1.661   | 3.00  | 4.00   | 5.00   | 6.00   | 7.00   | 3.375         | 5.434   | 1.687   | 4.00  | 4.00   | 5.00   | 6.00   | 8.00    |
| 0.15          | 3.194 | 0.3222067 | 0.0286625 | 1.40            | 1.00            | 3.939   | 1.004   | 3.00  | 3.00   | 4.00   | 4.00   | 5.00   | 3.375         | 4.101   | 1.039   | 3.00  | 3.00   | 4.00   | 5.00   | 5.00    |
| 0.15          | 3.194 | 0.3222067 | 0.0286625 | 0.90            | 1.00            | 17.862  | 12.281  | 6.00  | 9.00   | 15.00  | 23.00  | 34.00  | 3.375         | 19.583  | 13.590  | 7.00  | 10.00  | 16.00  | 25.00  | 37.00   |
| 0.15          | 3.194 | 0.3222067 | 0.0286625 | 0.80            | 1.00            | 5.458   | 2.342   | 3.00  | 4.00   | 5.00   | 7.00   | 9.00   | 3.375         | 5.688   | 2.359   | 3.00  | 4.00   | 5.00   | 7.00   | 9.00    |
| 0.15          | 3.194 | 0.3222067 | 0.0286625 | 0.70            | 1.00            | 3.036   | 0.969   | 2.00  | 2.00   | 3.00   | 4.00   | 4.00   | 3.375         | 3.142   | 1.008   | 2.00  | 2.00   | 3.00   | 4.00   | 4.00    |
| 0.15          | 3.194 | 0.3222067 | 0.0286625 | 0.60            | 1.00            | 2.085   | 0.555   | 1.00  | 2.00   | 2.00   | 2.00   | 3.00   | 3.375         | 2.153   | 0.567   | 2.00  | 2.00   | 2.00   | 2.00   | 3.00    |
| 0.15          | 3.194 | 0.3222067 | 0.0286625 | 0.50            | 1.00            | 1.531   | 0.515   | 1.00  | 1.00   | 2.00   | 2.00   | 2.00   | 3.375         | 1.585   | 0.510   | 1.00  | 1.00   | 2.00   | 2.00   | 2.00    |
| 0.05          | 2.701 | 0.1807278 | 0.0092167 | 1.00            | 1.00            | 370.234 | 354.010 | 54.00 | 120.00 | 265.00 | 508.00 | 838.10 | 2.897         | 500.684 | 482.925 | 65.00 | 156.00 | 355.00 | 685.25 | 1136.00 |
| 0.05          | 2.701 | 0.1807278 | 0.0092167 | 1.10            | 1.00            | 36.843  | 21.784  | 16.00 | 21.00  | 31.00  | 46.00  | 65.00  | 2.897         | 40.238  | 23.735  | 17.00 | 23.00  | 34.00  | 50.00  | 72.00   |
| 0.05          | 2.701 | 0.1807278 | 0.0092167 | 1.20            | 1.00            | 14.907  | 5.464   | 9.00  | 11.00  | 14.00  | 18.00  | 22.00  | 2.897         | 15.838  | 5.704   | 10.00 | 12.00  | 15.00  | 19.00  | 23.00   |

|                             |       |           |           |      |      |         |         |       |        |        |        |        |       |         |         |       |        |        |        |         |  |
|-----------------------------|-------|-----------|-----------|------|------|---------|---------|-------|--------|--------|--------|--------|-------|---------|---------|-------|--------|--------|--------|---------|--|
| 0.05                        | 2.701 | 0.1807278 | 0.0092167 | 1.30 | 1.00 | 9.752   | 2.716   | 7.00  | 8.00   | 9.00   | 11.00  | 13.00  | 2.897 | 10.253  | 2.800   | 7.00  | 8.00   | 10.00  | 12.00  | 14.00   |  |
| 0.05                        | 2.701 | 0.1807278 | 0.0092167 | 1.40 | 1.00 | 7.532   | 1.727   | 6.00  | 6.00   | 7.00   | 8.00   | 10.00  | 2.897 | 7.877   | 1.764   | 6.00  | 7.00   | 8.00   | 9.00   | 10.00   |  |
| 0.05                        | 2.701 | 0.1807278 | 0.0092167 | 0.90 | 1.00 | 27.792  | 16.068  | 12.00 | 16.00  | 24.00  | 35.00  | 49.00  | 2.897 | 30.381  | 17.558  | 13.00 | 18.00  | 26.00  | 38.00  | 53.00   |  |
| 0.05                        | 2.701 | 0.1807278 | 0.0092167 | 0.80 | 1.00 | 10.129  | 3.855   | 6.00  | 7.00   | 9.00   | 12.00  | 15.00  | 2.897 | 10.602  | 3.994   | 6.00  | 8.00   | 10.00  | 13.00  | 16.00   |  |
| 0.05                        | 2.701 | 0.1807278 | 0.0092167 | 0.70 | 1.00 | 5.780   | 1.766   | 4.00  | 5.00   | 6.00   | 7.00   | 8.00   | 2.897 | 6.054   | 1.828   | 4.00  | 5.00   | 6.00   | 7.00   | 8.00    |  |
| 0.05                        | 2.701 | 0.1807278 | 0.0092167 | 0.60 | 1.00 | 3.877   | 1.018   | 3.00  | 3.00   | 4.00   | 4.00   | 5.00   | 2.897 | 4.039   | 1.044   | 3.00  | 3.00   | 4.00   | 5.00   | 5.00    |  |
| 0.05                        | 2.701 | 0.1807278 | 0.0092167 | 0.50 | 1.00 | 2.809   | 0.679   | 2.00  | 2.00   | 3.00   | 3.00   | 4.00   | 2.897 | 2.912   | 0.691   | 2.00  | 2.00   | 3.00   | 3.00   | 4.00    |  |
| 0.10                        | 3.026 | 0.2588440 | 0.0187933 | 1.00 | 1.00 | 370.575 | 360.502 | 44.00 | 111.00 | 266.00 | 514.00 | 848.00 | 3.216 | 500.284 | 486.196 | 63.00 | 154.00 | 352.00 | 688.00 | 1135.10 |  |
| 0.10                        | 3.026 | 0.2588440 | 0.0187933 | 1.10 | 1.00 | 44.770  | 33.754  | 14.00 | 21.00  | 35.00  | 58.00  | 88.00  | 3.216 | 51.251  | 39.648  | 15.00 | 23.00  | 40.00  | 67.00  | 101.00  |  |
| 0.10                        | 3.026 | 0.2588440 | 0.0187933 | 1.20 | 1.00 | 14.354  | 6.929   | 7.00  | 9.00   | 13.00  | 18.00  | 23.00  | 3.216 | 15.486  | 7.439   | 8.00  | 10.00  | 14.00  | 19.00  | 25.00   |  |
| 0.10                        | 3.026 | 0.2588440 | 0.0187933 | 1.30 | 1.00 | 8.695   | 3.026   | 5.00  | 7.00   | 8.00   | 10.00  | 13.00  | 3.216 | 9.144   | 3.195   | 6.00  | 7.00   | 9.00   | 11.00  | 13.00   |  |
| 0.10                        | 3.026 | 0.2588440 | 0.0187933 | 1.40 | 1.00 | 6.465   | 1.806   | 4.00  | 5.00   | 6.00   | 7.00   | 9.00   | 3.216 | 6.773   | 1.893   | 5.00  | 5.00   | 6.00   | 8.00   | 9.00    |  |
| 0.10                        | 3.026 | 0.2588440 | 0.0187933 | 0.90 | 1.00 | 29.186  | 20.888  | 10.00 | 14.00  | 23.00  | 38.00  | 56.00  | 3.216 | 32.324  | 23.682  | 10.00 | 16.00  | 26.00  | 42.00  | 63.00   |  |
| 0.10                        | 3.026 | 0.2588440 | 0.0187933 | 0.80 | 1.00 | 8.890   | 4.174   | 5.00  | 6.00   | 8.00   | 11.00  | 14.00  | 3.216 | 9.284   | 4.272   | 5.00  | 6.00   | 8.00   | 11.00  | 15.00   |  |
| 0.10                        | 3.026 | 0.2588440 | 0.0187933 | 0.70 | 1.00 | 4.830   | 1.711   | 3.00  | 4.00   | 5.00   | 6.00   | 7.00   | 3.216 | 5.033   | 1.798   | 3.00  | 4.00   | 5.00   | 6.00   | 7.00    |  |
| 0.10                        | 3.026 | 0.2588440 | 0.0187933 | 0.60 | 1.00 | 3.190   | 0.962   | 2.00  | 3.00   | 3.00   | 4.00   | 4.00   | 3.216 | 3.292   | 0.992   | 2.00  | 3.00   | 3.00   | 4.00   | 5.00    |  |
| 0.10                        | 3.026 | 0.2588440 | 0.0187933 | 0.50 | 1.00 | 2.304   | 0.614   | 2.00  | 2.00   | 2.00   | 3.00   | 3.00   | 3.216 | 2.374   | 0.627   | 2.00  | 2.00   | 2.00   | 3.00   | 3.00    |  |
| 0.15                        | 3.219 | 0.3210252 | 0.0284260 | 1.00 | 1.00 | 370.785 | 364.849 | 45.00 | 112.00 | 260.00 | 511.00 | 845.00 | 3.402 | 503.858 | 500.278 | 59.00 | 149.00 | 346.00 | 700.00 | 1147.10 |  |
| 0.15                        | 3.219 | 0.3210252 | 0.0284260 | 1.10 | 1.00 | 59.026  | 50.403  | 13.00 | 24.00  | 44.00  | 79.00  | 125.00 | 3.402 | 70.528  | 61.837  | 15.00 | 26.00  | 52.00  | 94.25  | 151.00  |  |
| 0.15                        | 3.219 | 0.3210252 | 0.0284260 | 1.20 | 1.00 | 15.608  | 9.185   | 7.00  | 9.00   | 13.00  | 19.00  | 27.00  | 3.402 | 17.014  | 9.935   | 7.00  | 10.00  | 15.00  | 21.00  | 30.00   |  |
| 0.15                        | 3.219 | 0.3210252 | 0.0284260 | 1.30 | 1.00 | 8.526   | 3.505   | 5.00  | 6.00   | 8.00   | 10.00  | 13.00  | 3.402 | 9.041   | 3.785   | 5.00  | 6.00   | 8.00   | 11.00  | 14.00   |  |
| 0.15                        | 3.219 | 0.3210252 | 0.0284260 | 1.40 | 1.00 | 6.082   | 1.977   | 4.00  | 5.00   | 6.00   | 7.00   | 9.00   | 3.402 | 6.399   | 2.106   | 4.00  | 5.00   | 6.00   | 7.00   | 9.00    |  |
| 0.15                        | 3.219 | 0.3210252 | 0.0284260 | 0.90 | 1.00 | 32.569  | 25.558  | 9.00  | 14.00  | 25.00  | 43.00  | 67.00  | 3.402 | 35.929  | 29.277  | 9.00  | 15.00  | 27.00  | 48.00  | 73.00   |  |
| 0.15                        | 3.219 | 0.3210252 | 0.0284260 | 0.80 | 1.00 | 8.593   | 4.515   | 4.00  | 5.00   | 8.00   | 11.00  | 14.00  | 3.402 | 9.145   | 4.870   | 4.00  | 6.00   | 8.00   | 11.00  | 16.00   |  |
| 0.15                        | 3.219 | 0.3210252 | 0.0284260 | 0.70 | 1.00 | 4.425   | 1.772   | 3.00  | 3.00   | 4.00   | 5.00   | 7.00   | 3.402 | 4.572   | 1.833   | 3.00  | 3.00   | 4.00   | 5.00   | 7.00    |  |
| 0.15                        | 3.219 | 0.3210252 | 0.0284260 | 0.60 | 1.00 | 2.858   | 0.942   | 2.00  | 2.00   | 3.00   | 3.00   | 4.00   | 3.402 | 2.944   | 0.972   | 2.00  | 2.00   | 3.00   | 3.00   | 4.00    |  |
| 0.15                        | 3.219 | 0.3210252 | 0.0284260 | 0.50 | 1.00 | 2.077   | 0.612   | 1.00  | 2.00   | 2.00   | 3.00   | 3.00   | 3.402 | 2.128   | 0.610   | 1.00  | 2.00   | 2.00   | 2.00   | 3.00    |  |
| <b>Case 3</b>               |       |           |           |      |      |         |         |       |        |        |        |        |       |         |         |       |        |        |        |         |  |
| <b><math>\phi=80</math></b> |       |           |           |      |      |         |         |       |        |        |        |        |       |         |         |       |        |        |        |         |  |
| 0.05                        | 2.686 | 0.1809939 | 0.0093239 | 1.00 | 1.00 | 370.171 | 358.541 | 52.00 | 116.00 | 259.00 | 506.00 | 836.00 | 2.880 | 500.023 | 481.358 | 67.00 | 152.00 | 352.00 | 687.00 | 1124.00 |  |
| 0.05                        | 2.686 | 0.1809939 | 0.0093239 | 1.10 | 1.00 | 61.217  | 43.083  | 21.00 | 31.00  | 49.00  | 79.00  | 117.00 | 2.880 | 70.990  | 51.698  | 23.00 | 35.00  | 56.00  | 92.00  | 138.00  |  |
| 0.05                        | 2.686 | 0.1809939 | 0.0093239 | 1.20 | 1.00 | 22.984  | 10.381  | 12.00 | 16.00  | 21.00  | 28.00  | 37.00  | 2.880 | 24.531  | 11.098  | 13.00 | 17.00  | 22.00  | 30.00  | 39.00   |  |
| 0.05                        | 2.686 | 0.1809939 | 0.0093239 | 1.30 | 1.00 | 14.325  | 4.886   | 9.00  | 11.00  | 14.00  | 17.00  | 21.00  | 2.880 | 15.251  | 5.172   | 10.00 | 12.00  | 14.00  | 18.00  | 22.00   |  |
| 0.05                        | 2.686 | 0.1809939 | 0.0093239 | 1.40 | 1.00 | 10.757  | 2.980   | 7.00  | 9.00   | 10.00  | 12.00  | 15.00  | 2.880 | 11.366  | 3.082   | 8.00  | 9.00   | 11.00  | 13.00  | 16.00   |  |
| 0.05                        | 2.686 | 0.1809939 | 0.0093239 | 0.90 | 1.00 | 43.080  | 29.961  | 15.00 | 22.00  | 35.00  | 56.00  | 82.00  | 2.880 | 47.895  | 33.323  | 16.00 | 25.00  | 39.00  | 61.00  | 91.00   |  |
| 0.05                        | 2.686 | 0.1809939 | 0.0093239 | 0.80 | 1.00 | 14.554  | 6.620   | 8.00  | 10.00  | 13.00  | 18.00  | 23.00  | 2.880 | 15.469  | 7.014   | 8.00  | 11.00  | 14.00  | 19.00  | 25.00   |  |
| 0.05                        | 2.686 | 0.1809939 | 0.0093239 | 0.70 | 1.00 | 8.082   | 2.945   | 5.00  | 6.00   | 8.00   | 10.00  | 12.00  | 2.880 | 8.441   | 2.998   | 5.00  | 6.00   | 8.00   | 10.00  | 12.00   |  |
| 0.05                        | 2.686 | 0.1809939 | 0.0093239 | 0.60 | 1.00 | 5.281   | 1.637   | 3.00  | 4.00   | 5.00   | 6.00   | 7.00   | 2.880 | 5.467   | 1.663   | 4.00  | 4.00   | 5.00   | 6.00   | 8.00    |  |
| 0.05                        | 2.686 | 0.1809939 | 0.0093239 | 0.50 | 1.00 | 3.744   | 1.053   | 3.00  | 3.00   | 4.00   | 4.00   | 5.00   | 2.880 | 3.864   | 1.071   | 3.00  | 3.00   | 4.00   | 4.00   | 5.00    |  |
| 0.10                        | 3.015 | 0.2595725 | 0.0188190 | 1.00 | 1.00 | 370.849 | 364.131 | 46.00 | 114.00 | 260.00 | 510.00 | 851.10 | 3.204 | 499.684 | 497.469 | 59.00 | 149.00 | 349.50 | 689.25 | 1147.00 |  |
| 0.10                        | 3.015 | 0.2595725 | 0.0188190 | 1.10 | 1.00 | 84.696  | 72.814  | 19.00 | 33.00  | 63.00  | 113.00 | 181.00 | 3.204 | 104.032 | 90.873  | 23.00 | 40.00  | 77.00  | 137.00 | 223.00  |  |
| 0.10                        | 3.015 | 0.2595725 | 0.0188190 | 1.20 | 1.00 | 24.684  | 15.116  | 10.00 | 14.00  | 21.00  | 31.00  | 44.00  | 3.204 | 27.664  | 17.224  | 11.00 | 16.00  | 23.00  | 35.00  | 50.00   |  |
| 0.10                        | 3.015 | 0.2595725 | 0.0188190 | 1.30 | 1.00 | 13.770  | 6.093   | 7.00  | 9.00   | 12.00  | 17.00  | 22.00  | 3.204 | 14.661  | 6.565   | 8.00  | 10.00  | 13.00  | 18.00  | 23.00   |  |
| 0.10                        | 3.015 | 0.2595725 | 0.0188190 | 1.40 | 1.00 | 9.774   | 3.439   | 6.00  | 7.00   | 9.00   | 11.25  | 14.00  | 3.204 | 10.310  | 3.662   | 6.00  | 8.00   | 10.00  | 12.00  | 15.00   |  |
| 0.10                        | 3.015 | 0.2595725 | 0.0188190 | 0.90 | 1.00 | 46.948  | 37.909  | 12.00 | 20.00  | 36.00  | 62.00  | 96.00  | 3.204 | 53.626  | 44.308  | 13.00 | 23.00  | 40.00  | 71.00  | 111.00  |  |
| 0.10                        | 3.015 | 0.2595725 | 0.0188190 | 0.80 | 1.00 | 13.497  | 7.691   | 6.00  | 8.00   | 12.00  | 17.00  | 24.00  | 3.204 | 14.461  | 8.272   | 6.00  | 9.00   | 13.00  | 18.00  | 25.00   |  |
| 0.10                        | 3.015 | 0.2595725 | 0.0188190 | 0.70 | 1.00 | 6.907   | 3.024   | 4.00  | 5.00   | 6.00   | 8.00   | 11.00  | 3.204 | 7.191   | 3.053   | 4.00  | 5.00   | 7.00   | 9.00   | 11.00   |  |
| 0.10                        | 3.015 | 0.2595725 | 0.0188190 | 0.60 | 1.00 | 4.399   | 1.594   | 3.00  | 3.00   | 4.00   | 5.00   | 6.00   | 3.204 | 4.569   | 1.642   | 3.00  | 3.00   | 4.00   | 5.00   | 7.00    |  |
| 0.10                        | 3.015 | 0.2595725 | 0.0188190 | 0.50 | 1.00 | 3.062   | 0.986   | 2.00  | 2.00   | 3.00   | 4.00   | 4.00   | 3.204 | 3.186   | 1.010   | 2.00  | 2.00   | 3.00   | 4.00   | 4.00    |  |
| 0.15                        | 3.209 | 0.3224310 | 0.0286744 | 1.00 | 1.00 | 370.480 | 361.538 | 45.00 | 114.00 | 260.00 | 509.00 | 849.10 | 3.387 | 499.810 | 496.093 | 58.00 | 146.00 | 348.00 | 701.00 | 1136.00 |  |
| 0.15                        | 3.209 | 0.3224310 | 0.0286744 | 1.10 | 1.00 | 123.427 | 114.986 | 21.00 | 42.00  | 88.00  | 169.00 | 273.00 | 3.387 | 159.061 | 150.457 | 25.00 | 52.00  | 112.00 | 216.00 | 360.00  |  |
| 0.15                        | 3.209 | 0.3224310 | 0.0286744 | 1.20 | 1.00 | 30.668  | 22.749  | 10.00 | 15.00  | 24.00  | 39.00  | 60.00  | 3.387 | 36.111  | 27.422  | 11.00 | 17.00  | 28.00  | 47.00  | 72.00   |  |
| 0.15                        | 3.209 | 0.3224310 | 0.0286744 | 1.30 | 1.00 | 14.957  | 8.298   | 7.00  | 9.00   | 13.00  | 18.00  | 26.00  | 3.387 | 16.244  | 9.133   | 7.00  | 10.00  | 14.00  | 20.00  | 28.00   |  |
| 0.15                        | 3.209 | 0.3224310 | 0.0286744 | 1.40 | 1.00 | 9.778   | 4.279   | 5.00  | 7.00   | 9.00   | 12.00  | 15.00  | 3.387 | 10.514  | 4.569   | 6.00  | 7.00   | 10.00  | 13.00  | 16.00   |  |
| 0.15                        | 3.209 | 0.3224310 | 0.0286744 | 0.90 | 1.00 | 52.814  | 46.135  | 11.00 | 20.00  | 39.00  | 72.00  | 114.00 | 3.387 | 62.071  | 54.486  | 12.90 | 23.00  | 46.00  | 84.00  | 131.10  |  |
| 0.15                        | 3.209 | 0.3224310 | 0.0286744 | 0.80 | 1.00 | 13.714  | 8.832   | 5.00  | 8.00   | 11.00  | 17.00  | 25.00  | 3.387 | 14.439  | 9.501   | 5.00  | 8.00   | 12.00  | 18.00  | 26.00   |  |
| 0.15                        | 3.209 | 0.3224310 | 0.0286744 | 0.70 | 1.00 | 6.550   | 3.192   | 3.00  | 4.00   | 6.00   | 8.00   | 11.00  | 3.387 | 6.838   | 3.367   | 3.00  | 4.00   | 6.00   | 8.00   | 11.00   |  |
| 0.15                        | 3.209 | 0.3224310 | 0.0286744 | 0.60 | 1.00 | 4.001   | 1.634   | 2.00  | 3.00   | 4.00   | 5.00   | 6.00   | 3.387 | 4.      |         |       |        |        |        |         |  |

|      |       |           |           |      |      |         |         |       |        |        |        |        |       |         |         |       |        |        |        |         |
|------|-------|-----------|-----------|------|------|---------|---------|-------|--------|--------|--------|--------|-------|---------|---------|-------|--------|--------|--------|---------|
| 0.05 | 2.709 | 0.1808844 | 0.0091702 | 1.00 | 1.00 | 370.569 | 357.996 | 51.00 | 117.00 | 262.00 | 512.25 | 835.00 | 2.910 | 500.684 | 492.713 | 65.00 | 153.00 | 349.00 | 686.00 | 1133.10 |
| 0.05 | 2.709 | 0.1808844 | 0.0091702 | 1.10 | 1.00 | 137.977 | 116.741 | 33.00 | 56.00  | 103.00 | 183.00 | 289.00 | 2.910 | 167.995 | 145.676 | 38.00 | 65.75  | 124.00 | 225.00 | 357.00  |
| 0.05 | 2.709 | 0.1808844 | 0.0091702 | 1.20 | 1.00 | 49.116  | 30.700  | 19.00 | 27.00  | 41.00  | 62.00  | 90.00  | 2.910 | 55.281  | 35.488  | 21.00 | 30.00  | 46.00  | 71.00  | 102.00  |
| 0.05 | 2.709 | 0.1808844 | 0.0091702 | 1.30 | 1.00 | 27.982  | 13.583  | 14.00 | 18.00  | 25.00  | 34.00  | 45.00  | 2.910 | 30.284  | 14.504  | 16.00 | 20.00  | 27.00  | 37.00  | 49.00   |
| 0.05 | 2.709 | 0.1808844 | 0.0091702 | 1.40 | 1.00 | 20.108  | 7.949   | 12.00 | 14.00  | 19.00  | 24.00  | 30.00  | 2.910 | 21.412  | 8.244   | 13.00 | 15.00  | 20.00  | 26.00  | 32.00   |
| 0.05 | 2.709 | 0.1808844 | 0.0091702 | 0.90 | 1.00 | 81.366  | 66.553  | 21.00 | 35.00  | 62.00  | 106.00 | 166.00 | 2.910 | 93.429  | 76.781  | 23.00 | 39.00  | 71.00  | 124.00 | 195.00  |
| 0.05 | 2.709 | 0.1808844 | 0.0091702 | 0.80 | 1.00 | 26.777  | 16.497  | 11.00 | 15.00  | 23.00  | 34.00  | 48.00  | 2.910 | 28.991  | 17.229  | 12.00 | 17.00  | 25.00  | 37.00  | 52.00   |
| 0.05 | 2.709 | 0.1808844 | 0.0091702 | 0.70 | 1.00 | 13.995  | 6.624   | 7.00  | 9.00   | 13.00  | 17.00  | 23.00  | 2.910 | 14.728  | 7.049   | 7.00  | 10.00  | 13.00  | 18.00  | 24.00   |
| 0.05 | 2.709 | 0.1808844 | 0.0091702 | 0.60 | 1.00 | 8.704   | 3.508   | 5.00  | 6.00   | 8.00   | 11.00  | 13.00  | 2.910 | 9.155   | 3.595   | 5.00  | 7.00   | 9.00   | 11.00  | 14.00   |
| 0.05 | 2.709 | 0.1808844 | 0.0091702 | 0.50 | 1.00 | 5.977   | 2.146   | 4.00  | 4.00   | 6.00   | 7.00   | 9.00   | 2.910 | 6.279   | 2.247   | 4.00  | 5.00   | 6.00   | 8.00   | 9.00    |
| 0.05 | 2.709 | 0.1808844 | 0.0091702 | 1.00 | 1.10 | 350.110 | 332.849 | 54.00 | 113.00 | 249.00 | 481.00 | 771.10 | 2.910 | 493.559 | 474.594 | 70.00 | 154.00 | 349.00 | 676.00 | 1127.00 |
| 0.10 | 3.027 | 0.2591139 | 0.0188166 | 1.00 | 1.00 | 370.468 | 364.483 | 45.00 | 109.00 | 256.00 | 509.25 | 842.00 | 3.220 | 501.043 | 489.473 | 60.00 | 147.00 | 345.00 | 684.00 | 1135.10 |
| 0.10 | 3.027 | 0.2591139 | 0.0188166 | 1.10 | 1.00 | 218.623 | 204.640 | 36.00 | 73.00  | 155.00 | 297.25 | 484.10 | 3.220 | 294.570 | 281.306 | 44.00 | 96.00  | 206.00 | 403.00 | 680.00  |
| 0.10 | 3.027 | 0.2591139 | 0.0188166 | 1.20 | 1.00 | 70.543  | 57.730  | 18.00 | 30.00  | 53.00  | 93.00  | 146.00 | 3.220 | 87.125  | 72.398  | 22.00 | 36.00  | 65.00  | 116.00 | 181.00  |
| 0.10 | 3.027 | 0.2591139 | 0.0188166 | 1.30 | 1.00 | 33.719  | 22.160  | 13.00 | 18.00  | 28.00  | 43.00  | 62.00  | 3.220 | 38.740  | 26.531  | 14.00 | 20.00  | 31.00  | 50.00  | 73.00   |
| 0.10 | 3.027 | 0.2591139 | 0.0188166 | 1.40 | 1.00 | 21.287  | 11.180  | 10.00 | 13.00  | 19.00  | 26.00  | 36.00  | 3.220 | 23.950  | 12.986  | 11.00 | 15.00  | 21.00  | 30.00  | 41.00   |
| 0.10 | 3.027 | 0.2591139 | 0.0188166 | 0.90 | 1.00 | 89.991  | 82.159  | 17.00 | 32.00  | 64.00  | 121.00 | 199.00 | 3.220 | 106.794 | 96.550  | 20.00 | 38.00  | 78.00  | 145.00 | 232.00  |
| 0.10 | 3.027 | 0.2591139 | 0.0188166 | 0.80 | 1.00 | 26.891  | 19.508  | 8.00  | 13.00  | 22.00  | 35.00  | 52.00  | 3.220 | 29.526  | 21.675  | 9.00  | 14.00  | 23.00  | 38.00  | 58.00   |
| 0.10 | 3.027 | 0.2591139 | 0.0188166 | 0.70 | 1.00 | 12.580  | 7.269   | 5.00  | 7.00   | 11.00  | 16.00  | 22.00  | 3.220 | 13.464  | 7.786   | 6.00  | 8.00   | 12.00  | 17.00  | 24.00   |
| 0.10 | 3.027 | 0.2591139 | 0.0188166 | 0.60 | 1.00 | 7.559   | 3.651   | 4.00  | 5.00   | 7.00   | 9.00   | 12.00  | 3.220 | 7.942   | 3.802   | 4.00  | 5.00   | 7.00   | 10.00  | 13.00   |
| 0.10 | 3.027 | 0.2591139 | 0.0188166 | 0.50 | 1.00 | 5.046   | 2.096   | 3.00  | 4.00   | 5.00   | 6.00   | 8.00   | 3.220 | 5.228   | 2.166   | 3.00  | 4.00   | 5.00   | 6.00   | 8.00    |
| 0.15 | 3.238 | 0.3214631 | 0.0286840 | 1.00 | 1.00 | 370.233 | 365.299 | 42.00 | 109.00 | 254.00 | 506.00 | 846.00 | 3.424 | 501.240 | 501.237 | 57.00 | 147.00 | 352.00 | 704.00 | 1159.00 |
| 0.15 | 3.238 | 0.3214631 | 0.0286840 | 1.10 | 1.00 | 337.031 | 323.411 | 42.00 | 100.00 | 239.00 | 470.00 | 768.00 | 3.424 | 479.861 | 469.445 | 59.00 | 144.00 | 336.00 | 666.00 | 1084.20 |
| 0.15 | 3.238 | 0.3214631 | 0.0286840 | 1.20 | 1.00 | 118.029 | 109.789 | 21.00 | 41.00  | 85.00  | 159.00 | 255.00 | 3.424 | 157.470 | 149.001 | 26.00 | 51.75  | 110.00 | 214.00 | 354.00  |
| 0.15 | 3.238 | 0.3214631 | 0.0286840 | 1.30 | 1.00 | 49.892  | 39.957  | 14.00 | 22.00  | 38.00  | 66.00  | 102.00 | 3.424 | 61.037  | 50.910  | 15.00 | 25.00  | 45.00  | 80.00  | 128.00  |
| 0.15 | 3.238 | 0.3214631 | 0.0286840 | 1.40 | 1.00 | 27.929  | 19.154  | 10.00 | 15.00  | 22.00  | 35.00  | 53.00  | 3.424 | 32.439  | 23.048  | 11.00 | 16.00  | 26.00  | 42.00  | 62.10   |
| 0.15 | 3.238 | 0.3214631 | 0.0286840 | 0.90 | 1.00 | 98.729  | 91.667  | 16.00 | 34.00  | 71.00  | 135.00 | 216.00 | 3.424 | 118.337 | 111.662 | 18.00 | 39.00  | 84.00  | 162.00 | 260.00  |
| 0.15 | 3.238 | 0.3214631 | 0.0286840 | 0.80 | 1.00 | 28.672  | 22.970  | 7.00  | 12.00  | 22.00  | 38.00  | 59.00  | 3.424 | 32.066  | 26.409  | 8.00  | 13.00  | 24.00  | 43.00  | 66.00   |
| 0.15 | 3.238 | 0.3214631 | 0.0286840 | 0.70 | 1.00 | 12.596  | 8.244   | 5.00  | 7.00   | 11.00  | 16.00  | 23.00  | 3.424 | 13.432  | 8.772   | 5.00  | 7.00   | 11.00  | 17.00  | 25.00   |
| 0.15 | 3.238 | 0.3214631 | 0.0286840 | 0.60 | 1.00 | 7.069   | 3.851   | 3.00  | 4.00   | 6.00   | 9.00   | 12.00  | 3.424 | 7.544   | 4.149   | 3.00  | 5.00   | 7.00   | 9.00   | 13.00   |
| 0.15 | 3.238 | 0.3214631 | 0.0286840 | 0.50 | 1.00 | 4.638   | 2.147   | 2.00  | 3.00   | 4.00   | 6.00   | 7.00   | 3.424 | 4.824   | 2.242   | 2.00  | 3.00   | 4.00   | 6.00   | 8.00    |

TABLE S.3. ARL Results of the Max-EWMA control chart when pure shift occurs in the shape parameter of UNH distribution ( $\Delta_\alpha \in (1.0, 1.1, 1.2, 1.3, 1.4, 0.9, 0.8, 0.7, 0.6, 0.5)$ ,  $\Delta_\delta = 1.0$ ) when  $X \sim B(\gamma, \delta)$ ,  $T \sim UNH(\alpha, \lambda)$ ,  $\mu = 0.20$ ,  $\alpha_0 = 0.50$ ,  $\lambda_0 = 1.00$ ,  $ARL_0 \in (370, 500)$  and  $\theta_e \in (0.05, 0.10, 0.15)$

| $\theta_e$ | $K$   | $EM$      | $VM$      | $\Delta_\delta$ | $\Delta_\alpha$ | $ARL$   | $SDRL$  | $q10$ | $q25$  | $q50$  | $q75$  | $q90$   | $K$           | $ARL$   | $SDRL$  | $q10$ | $q25$  | $q50$  | $q75$  | $q90$   |  |
|------------|-------|-----------|-----------|-----------------|-----------------|---------|---------|-------|--------|--------|--------|---------|---------------|---------|---------|-------|--------|--------|--------|---------|--|
|            |       |           |           |                 |                 |         |         |       |        |        |        |         | $ARL_0 = 370$ |         |         |       |        |        |        |         |  |
|            |       |           |           |                 |                 |         |         |       |        |        |        |         | $ARL_0 = 500$ |         |         |       |        |        |        |         |  |
| Case 1     |       |           |           |                 |                 |         |         |       |        |        |        |         |               |         |         |       |        |        |        |         |  |
| $\phi=290$ |       |           |           |                 |                 |         |         |       |        |        |        |         |               |         |         |       |        |        |        |         |  |
| 0.05       | 2.688 | 0.1811987 | 0.0092639 | 1.00            | 1.00            | 370.013 | 352.085 | 52.00 | 114.00 | 257.00 | 512.00 | 828.10  | 2.893         | 500.757 | 490.403 | 70.00 | 156.00 | 352.50 | 677.00 | 1134.10 |  |
| 0.05       | 2.688 | 0.1811987 | 0.0092639 | 1.00            | 1.10            | 351.081 | 338.585 | 54.00 | 115.00 | 248.00 | 472.00 | 790.00  | 2.893         | 491.794 | 475.443 | 70.00 | 158.00 | 348.00 | 677.00 | 1105.20 |  |
| 0.05       | 2.688 | 0.1811987 | 0.0092639 | 1.00            | 1.20            | 234.316 | 210.895 | 43.90 | 84.00  | 170.00 | 317.00 | 513.00  | 2.893         | 309.201 | 286.482 | 53.00 | 108.00 | 222.00 | 418.00 | 677.10  |  |
| 0.05       | 2.688 | 0.1811987 | 0.0092639 | 1.00            | 1.30            | 149.002 | 125.166 | 35.00 | 59.00  | 112.00 | 201.00 | 313.00  | 2.893         | 191.280 | 165.340 | 43.00 | 74.00  | 141.00 | 256.00 | 411.00  |  |
| 0.05       | 2.688 | 0.1811987 | 0.0092639 | 1.00            | 1.40            | 105.305 | 82.476  | 30.00 | 47.00  | 81.00  | 138.00 | 213.00  | 2.893         | 128.413 | 103.414 | 34.00 | 56.00  | 99.00  | 168.00 | 264.00  |  |
| 0.05       | 2.688 | 0.1811987 | 0.0092639 | 1.00            | 0.90            | 227.116 | 213.036 | 38.00 | 79.00  | 161.00 | 304.25 | 505.00  | 2.893         | 285.511 | 267.954 | 45.00 | 94.00  | 204.00 | 391.00 | 633.00  |  |
| 0.05       | 2.688 | 0.1811987 | 0.0092639 | 1.00            | 0.80            | 113.510 | 97.238  | 26.00 | 45.00  | 84.00  | 151.00 | 238.00  | 2.893         | 132.394 | 113.699 | 30.00 | 52.00  | 98.00  | 178.25 | 280.00  |  |
| 0.05       | 2.688 | 0.1811987 | 0.0092639 | 1.00            | 0.70            | 55.412  | 39.232  | 18.00 | 28.00  | 45.00  | 72.00  | 106.00  | 2.893         | 62.991  | 46.039  | 21.00 | 31.00  | 50.00  | 81.00  | 123.00  |  |
| 0.05       | 2.688 | 0.1811987 | 0.0092639 | 1.00            | 0.60            | 31.460  | 18.365  | 14.00 | 19.00  | 27.00  | 39.00  | 55.00   | 2.893         | 33.486  | 18.964  | 15.00 | 20.00  | 29.00  | 42.00  | 58.00   |  |
| 0.05       | 2.688 | 0.1811987 | 0.0092639 | 1.00            | 0.50            | 19.499  | 8.819   | 10.00 | 13.00  | 18.00  | 24.00  | 31.00   | 2.893         | 20.649  | 9.275   | 11.00 | 14.00  | 19.00  | 25.00  | 33.00   |  |
| 0.10       | 3.016 | 0.2591350 | 0.0188482 | 1.00            | 1.00            | 371.343 | 361.678 | 46.00 | 115.00 | 268.00 | 518.00 | 840.00  | 3.203         | 499.233 | 498.621 | 58.00 | 144.00 | 344.50 | 692.00 | 1142.10 |  |
| 0.10       | 3.016 | 0.2591350 | 0.0188482 | 1.00            | 1.10            | 462.649 | 453.490 | 57.00 | 139.00 | 322.00 | 641.00 | 1057.10 | 3.203         | 655.636 | 643.253 | 79.00 | 198.00 | 460.50 | 902.25 | 1492.10 |  |
| 0.10       | 3.016 | 0.2591350 | 0.0188482 | 1.00            | 1.20            | 445.854 | 440.453 | 55.00 | 135.00 | 310.00 | 614.00 | 997.00  | 3.203         | 672.703 | 661.035 | 83.00 | 205.00 | 466.00 | 919.00 | 1538.10 |  |
| 0.10       | 3.016 | 0.2591350 | 0.0188482 | 1.00            | 1.30            | 352.014 | 335.558 | 49.00 | 111.00 | 250.00 | 488.00 | 784.00  | 3.203         | 539.580 | 525.026 | 69.00 | 166.00 | 379.00 | 743.25 | 1207.10 |  |
| 0.10       | 3.016 | 0.2591350 | 0.0188482 | 1.00            | 1.40            | 257.853 | 240.118 | 41.00 | 85.00  | 185.00 | 354.00 | 571.00  | 3.203         | 390.345 | 374.763 | 57.00 | 122.00 | 275.00 | 537.00 | 899.00  |  |
| 0.10       | 3.016 | 0.2591350 | 0.0188482 | 1.00            | 0.90            | 233.382 | 224.103 | 31.00 | 73.00  | 163.00 | 321.00 | 532.10  | 3.203         | 302.592 | 287.160 | 40.00 | 94.00  | 218.00 | 417.00 | 683.10  |  |

|      |       |           |           |      |      |         |         |       |        |        |        |         |       |         |         |       |        |        |         |         |
|------|-------|-----------|-----------|------|------|---------|---------|-------|--------|--------|--------|---------|-------|---------|---------|-------|--------|--------|---------|---------|
| 0.10 | 3.016 | 0.2591350 | 0.0188482 | 1.00 | 0.80 | 127.543 | 117.674 | 23.00 | 44.00  | 91.00  | 173.00 | 283.00  | 3.203 | 157.964 | 147.934 | 26.00 | 54.00  | 113.00 | 215.00  | 351.00  |
| 0.10 | 3.016 | 0.2591350 | 0.0188482 | 1.00 | 0.70 | 65.337  | 55.335  | 15.00 | 26.00  | 49.00  | 87.00  | 136.00  | 3.203 | 75.086  | 63.939  | 17.00 | 29.75  | 56.00  | 101.00  | 159.00  |
| 0.10 | 3.016 | 0.2591350 | 0.0188482 | 1.00 | 0.60 | 34.037  | 24.614  | 11.00 | 17.00  | 27.00  | 44.00  | 66.00   | 3.203 | 38.037  | 27.949  | 12.00 | 18.00  | 30.00  | 49.00   | 75.00   |
| 0.10 | 3.016 | 0.2591350 | 0.0188482 | 1.00 | 0.50 | 19.623  | 11.299  | 8.00  | 12.00  | 17.00  | 25.00  | 34.00   | 3.203 | 21.218  | 12.370  | 9.00  | 13.00  | 18.00  | 27.00   | 37.00   |
| 0.15 | 3.194 | 0.3222067 | 0.0286625 | 1.00 | 1.00 | 370.240 | 360.482 | 43.00 | 110.00 | 261.50 | 512.00 | 841.00  | 3.375 | 500.340 | 488.797 | 56.90 | 146.00 | 345.00 | 688.00  | 1135.10 |
| 0.15 | 3.194 | 0.3222067 | 0.0286625 | 1.00 | 1.10 | 477.817 | 471.384 | 55.00 | 142.00 | 333.00 | 658.25 | 1103.20 | 3.375 | 655.261 | 646.196 | 72.00 | 190.00 | 458.00 | 908.25  | 1516.10 |
| 0.15 | 3.194 | 0.3222067 | 0.0286625 | 1.00 | 1.20 | 558.437 | 555.246 | 64.00 | 160.00 | 387.00 | 777.25 | 1275.00 | 3.375 | 787.682 | 779.621 | 88.00 | 227.00 | 547.00 | 1091.00 | 1807.00 |
| 0.15 | 3.194 | 0.3222067 | 0.0286625 | 1.00 | 1.30 | 621.075 | 620.569 | 72.00 | 179.00 | 430.00 | 864.00 | 1421.20 | 3.375 | 848.382 | 838.348 | 93.00 | 241.75 | 591.00 | 1173.00 | 1979.00 |
| 0.15 | 3.194 | 0.3222067 | 0.0286625 | 1.00 | 1.40 | 648.980 | 636.379 | 75.00 | 198.00 | 455.00 | 896.00 | 1464.00 | 3.375 | 916.539 | 894.465 | 99.00 | 266.00 | 630.00 | 1294.00 | 2122.20 |
| 0.15 | 3.194 | 0.3222067 | 0.0286625 | 1.00 | 0.90 | 243.465 | 234.436 | 31.00 | 74.00  | 169.00 | 339.00 | 562.00  | 3.375 | 321.474 | 317.065 | 41.00 | 98.00  | 227.00 | 440.00  | 729.00  |
| 0.15 | 3.194 | 0.3222067 | 0.0286625 | 1.00 | 0.80 | 142.974 | 137.241 | 21.00 | 46.00  | 100.00 | 195.25 | 318.00  | 3.375 | 180.334 | 174.248 | 25.00 | 57.00  | 126.00 | 246.25  | 405.00  |
| 0.15 | 3.194 | 0.3222067 | 0.0286625 | 1.00 | 0.70 | 76.536  | 69.791  | 14.00 | 27.00  | 55.00  | 104.00 | 166.00  | 3.375 | 93.323  | 85.432  | 17.00 | 32.00  | 68.00  | 126.00  | 201.00  |
| 0.15 | 3.194 | 0.3222067 | 0.0286625 | 1.00 | 0.60 | 40.115  | 32.289  | 11.00 | 17.00  | 31.00  | 53.00  | 83.00   | 3.375 | 46.330  | 38.592  | 11.00 | 19.00  | 35.00  | 61.00   | 97.00   |
| 0.15 | 3.194 | 0.3222067 | 0.0286625 | 1.00 | 0.50 | 21.712  | 14.827  | 8.00  | 11.00  | 18.00  | 28.00  | 41.00   | 3.375 | 23.941  | 16.855  | 8.00  | 12.00  | 19.00  | 31.00   | 46.00   |

Case 2  
 $\phi=148$

|      |       |           |           |      |      |         |         |       |        |        |        |         |       |         |         |        |        |        |         |         |
|------|-------|-----------|-----------|------|------|---------|---------|-------|--------|--------|--------|---------|-------|---------|---------|--------|--------|--------|---------|---------|
| 0.05 | 2.701 | 0.1807278 | 0.0092167 | 1.00 | 1.00 | 370.234 | 354.010 | 54.00 | 120.00 | 265.00 | 508.00 | 838.10  | 2.897 | 500.684 | 482.925 | 65.00  | 156.00 | 355.00 | 685.25  | 1136.00 |
| 0.05 | 2.701 | 0.1807278 | 0.0092167 | 1.00 | 1.10 | 351.251 | 331.866 | 51.90 | 113.00 | 251.00 | 477.00 | 793.00  | 2.897 | 486.833 | 467.687 | 68.00  | 151.75 | 343.00 | 670.00  | 1107.00 |
| 0.05 | 2.701 | 0.1807278 | 0.0092167 | 1.00 | 1.20 | 232.647 | 210.038 | 45.00 | 84.00  | 170.00 | 315.00 | 506.00  | 2.897 | 307.527 | 280.240 | 54.00  | 108.00 | 227.00 | 414.00  | 662.00  |
| 0.05 | 2.701 | 0.1807278 | 0.0092167 | 1.00 | 1.30 | 151.432 | 128.634 | 36.00 | 61.00  | 113.00 | 202.00 | 318.00  | 2.897 | 191.895 | 167.654 | 42.00  | 74.00  | 141.00 | 255.00  | 406.00  |
| 0.05 | 2.701 | 0.1807278 | 0.0092167 | 1.00 | 1.40 | 106.013 | 82.513  | 30.00 | 47.00  | 82.00  | 139.00 | 214.00  | 2.897 | 129.961 | 105.808 | 34.00  | 56.00  | 98.00  | 171.00  | 268.00  |
| 0.05 | 2.701 | 0.1807278 | 0.0092167 | 1.00 | 0.90 | 227.939 | 210.906 | 38.90 | 78.00  | 166.00 | 308.25 | 501.00  | 2.897 | 290.492 | 274.952 | 45.00  | 96.00  | 208.00 | 392.00  | 645.00  |
| 0.05 | 2.701 | 0.1807278 | 0.0092167 | 1.00 | 0.80 | 109.494 | 93.719  | 26.00 | 45.00  | 81.00  | 145.00 | 228.00  | 2.897 | 132.548 | 114.091 | 29.00  | 52.00  | 99.00  | 177.00  | 285.00  |
| 0.05 | 2.701 | 0.1807278 | 0.0092167 | 1.00 | 0.70 | 55.960  | 40.529  | 18.00 | 27.00  | 45.00  | 72.00  | 108.00  | 2.897 | 62.965  | 45.610  | 20.00  | 31.00  | 50.00  | 82.00   | 123.00  |
| 0.05 | 2.701 | 0.1807278 | 0.0092167 | 1.00 | 0.60 | 31.416  | 18.111  | 13.00 | 19.00  | 27.00  | 40.00  | 55.00   | 2.897 | 34.037  | 19.945  | 14.00  | 20.00  | 29.00  | 43.00   | 60.00   |
| 0.05 | 2.701 | 0.1807278 | 0.0092167 | 1.00 | 0.50 | 19.462  | 8.682   | 10.00 | 13.00  | 18.00  | 24.00  | 31.00   | 2.897 | 20.741  | 9.235   | 11.00  | 14.00  | 19.00  | 25.00   | 33.00   |
| 0.10 | 3.026 | 0.2588440 | 0.0187933 | 1.00 | 1.00 | 370.575 | 360.502 | 44.00 | 111.00 | 266.00 | 514.00 | 848.00  | 3.216 | 500.284 | 486.196 | 63.00  | 154.00 | 352.00 | 688.00  | 1135.10 |
| 0.10 | 3.026 | 0.2588440 | 0.0187933 | 1.00 | 1.10 | 461.986 | 447.553 | 58.00 | 142.00 | 325.00 | 641.00 | 1057.10 | 3.216 | 669.192 | 654.327 | 73.90  | 199.75 | 467.00 | 935.00  | 1539.00 |
| 0.10 | 3.026 | 0.2588440 | 0.0187933 | 1.00 | 1.20 | 448.520 | 436.881 | 56.00 | 137.00 | 315.00 | 620.00 | 1007.00 | 3.216 | 678.644 | 667.126 | 80.00  | 199.00 | 473.00 | 937.00  | 1550.20 |
| 0.10 | 3.026 | 0.2588440 | 0.0187933 | 1.00 | 1.30 | 358.407 | 344.731 | 50.00 | 114.00 | 252.00 | 497.00 | 800.00  | 3.216 | 549.788 | 537.696 | 71.90  | 166.00 | 384.00 | 761.25  | 1249.10 |
| 0.10 | 3.026 | 0.2588440 | 0.0187933 | 1.00 | 1.40 | 257.729 | 244.849 | 41.00 | 85.75  | 180.00 | 352.00 | 572.10  | 3.216 | 390.255 | 378.560 | 56.00  | 123.00 | 273.00 | 531.00  | 885.10  |
| 0.10 | 3.026 | 0.2588440 | 0.0187933 | 1.00 | 0.90 | 232.565 | 221.804 | 32.00 | 73.00  | 164.00 | 321.00 | 523.00  | 3.216 | 307.459 | 298.289 | 40.00  | 95.00  | 214.00 | 424.00  | 694.00  |
| 0.10 | 3.026 | 0.2588440 | 0.0187933 | 1.00 | 0.80 | 127.073 | 115.405 | 23.00 | 44.00  | 92.00  | 173.00 | 277.00  | 3.216 | 157.475 | 146.076 | 25.00  | 52.00  | 113.00 | 219.00  | 352.10  |
| 0.10 | 3.026 | 0.2588440 | 0.0187933 | 1.00 | 0.70 | 65.175  | 54.637  | 15.00 | 26.00  | 49.00  | 87.00  | 137.00  | 3.216 | 77.163  | 67.268  | 17.00  | 30.00  | 57.00  | 103.00  | 162.10  |
| 0.10 | 3.026 | 0.2588440 | 0.0187933 | 1.00 | 0.60 | 33.866  | 24.511  | 11.00 | 17.00  | 27.00  | 43.00  | 65.00   | 3.216 | 38.624  | 28.490  | 12.00  | 19.00  | 30.00  | 50.00   | 76.00   |
| 0.10 | 3.026 | 0.2588440 | 0.0187933 | 1.00 | 0.50 | 19.341  | 10.884  | 8.00  | 12.00  | 17.00  | 24.00  | 33.00   | 3.216 | 21.327  | 12.598  | 9.00   | 12.00  | 18.00  | 27.00   | 38.00   |
| 0.15 | 3.219 | 0.3210252 | 0.0284260 | 1.00 | 1.00 | 370.785 | 364.849 | 45.00 | 112.00 | 260.00 | 511.00 | 845.00  | 3.402 | 503.858 | 500.278 | 59.00  | 149.00 | 346.00 | 700.00  | 1147.10 |
| 0.15 | 3.219 | 0.3210252 | 0.0284260 | 1.00 | 1.10 | 474.654 | 476.905 | 53.00 | 134.00 | 328.00 | 650.00 | 1097.00 | 3.402 | 647.158 | 641.214 | 73.00  | 193.00 | 451.00 | 889.00  | 1481.00 |
| 0.15 | 3.219 | 0.3210252 | 0.0284260 | 1.00 | 1.20 | 574.066 | 572.425 | 63.00 | 166.00 | 396.00 | 803.00 | 1316.00 | 3.402 | 782.225 | 766.911 | 87.90  | 230.00 | 549.00 | 1075.25 | 1787.00 |
| 0.15 | 3.219 | 0.3210252 | 0.0284260 | 1.00 | 1.30 | 620.153 | 620.480 | 65.90 | 181.00 | 428.00 | 851.00 | 1437.00 | 3.402 | 876.609 | 851.229 | 99.00  | 262.75 | 616.50 | 1202.25 | 2005.00 |
| 0.15 | 3.219 | 0.3210252 | 0.0284260 | 1.00 | 1.40 | 642.378 | 632.610 | 74.00 | 189.00 | 447.00 | 883.00 | 1465.10 | 3.402 | 910.699 | 871.479 | 104.00 | 274.00 | 644.00 | 1269.00 | 2088.00 |
| 0.15 | 3.219 | 0.3210252 | 0.0284260 | 1.00 | 0.90 | 248.428 | 241.410 | 31.00 | 75.00  | 174.00 | 342.00 | 561.00  | 3.402 | 319.325 | 309.204 | 40.00  | 96.00  | 225.50 | 442.00  | 728.00  |
| 0.15 | 3.219 | 0.3210252 | 0.0284260 | 1.00 | 0.80 | 142.742 | 135.405 | 21.00 | 47.00  | 101.00 | 196.00 | 315.00  | 3.402 | 181.317 | 174.657 | 25.00  | 57.00  | 129.00 | 248.00  | 404.00  |
| 0.15 | 3.219 | 0.3210252 | 0.0284260 | 1.00 | 0.70 | 76.143  | 68.148  | 15.00 | 28.00  | 55.00  | 102.00 | 166.00  | 3.402 | 93.339  | 85.665  | 17.00  | 32.00  | 67.00  | 126.00  | 207.00  |
| 0.15 | 3.219 | 0.3210252 | 0.0284260 | 1.00 | 0.60 | 39.596  | 32.316  | 10.00 | 17.00  | 30.00  | 52.00  | 81.00   | 3.402 | 46.466  | 38.302  | 11.00  | 19.00  | 35.00  | 62.00   | 96.00   |
| 0.15 | 3.219 | 0.3210252 | 0.0284260 | 1.00 | 0.50 | 21.526  | 14.670  | 8.00  | 11.00  | 17.00  | 28.00  | 41.00   | 3.402 | 23.972  | 16.520  | 9.00   | 12.00  | 19.00  | 31.00   | 46.00   |

Case 3  
 $\phi=80$

|      |       |           |           |      |      |         |         |       |        |        |        |        |       |         |         |       |        |        |        |         |
|------|-------|-----------|-----------|------|------|---------|---------|-------|--------|--------|--------|--------|-------|---------|---------|-------|--------|--------|--------|---------|
| 0.05 | 2.686 | 0.1809939 | 0.0093239 | 1.00 | 1.00 | 370.171 | 358.541 | 52.00 | 116.00 | 259.00 | 506.00 | 836.00 | 2.880 | 500.023 | 481.358 | 67.00 | 152.00 | 352.00 | 687.00 | 1124.00 |
| 0.05 | 2.686 | 0.1809939 | 0.0093239 | 1.00 | 1.10 | 355.275 | 337.477 | 54.00 | 112.00 | 252.00 | 486.00 | 792.10 | 2.880 | 489.431 | 476.741 | 68.00 | 151.00 | 343.00 | 674.00 | 1112.00 |
| 0.05 | 2.686 | 0.1809939 | 0.0093239 | 1.00 | 1.20 | 235.497 | 216.039 | 44.90 | 84.00  | 169.00 | 316.00 | 514.10 | 2.880 | 314.895 | 286.933 | 57.00 | 109.00 | 227.50 | 428.25 | 690.00  |
| 0.05 | 2.686 | 0.1809939 | 0.0093239 | 1.00 | 1.30 | 150.093 | 128.041 | 35.00 | 60.00  | 113.00 | 198.00 | 314.00 | 2.880 | 190.420 | 165.015 | 41.00 | 73.00  | 140.00 | 256.00 | 401.00  |
| 0.05 | 2.686 | 0.1809939 | 0.0093239 | 1.00 | 1.40 | 105.429 | 82.674  | 31.00 | 48.00  | 80.00  | 138.00 | 211.00 | 2.880 | 128.984 | 103.314 | 35.00 | 56.00  | 99.00  | 171.00 | 262.00  |
| 0.05 | 2.686 | 0.1809939 | 0.0093239 | 1.00 | 0.90 | 228.299 | 212.967 | 38.00 | 77.00  | 163.00 | 309.00 | 502.00 | 2.880 | 289.868 | 272.260 | 46.00 | 96.00  | 206.00 | 397.00 | 638.10  |
| 0.05 | 2.686 | 0.1809939 | 0.0093239 | 1.00 | 0.80 | 111.765 | 94.071  | 26.00 | 45.00  | 85.00  | 149.00 | 235.00 | 2.880 | 131.846 | 112.950 | 29.00 | 52.00  | 99.00  | 174.00 | 280.10  |
| 0.05 | 2.686 | 0.1809939 | 0.0093239 | 1.00 | 0.70 | 56.143  | 40.935  | 18.00 | 28.00  | 45.00  | 72.00  | 108.00 | 2.880 | 63.499  | 46.748  | 20.00 | 31.00  | 51.00  | 82.00  | 123.00  |
| 0.05 | 2.686 | 0.1809939 | 0.0093239 | 1.00 | 0.60 | 3       |         |       |        |        |        |        |       |         |         |       |        |        |        |         |

|      |       |           |           |      |      |         |         |       |        |        |        |         |       |         |         |        |        |        |         |         |
|------|-------|-----------|-----------|------|------|---------|---------|-------|--------|--------|--------|---------|-------|---------|---------|--------|--------|--------|---------|---------|
| 0.10 | 3.015 | 0.2595725 | 0.0188190 | 1.00 | 1.30 | 354.576 | 338.798 | 50.00 | 110.00 | 250.00 | 489.25 | 802.10  | 3.204 | 547.375 | 535.162 | 71.00  | 167.00 | 389.00 | 745.00  | 1249.10 |
| 0.10 | 3.015 | 0.2595725 | 0.0188190 | 1.00 | 1.40 | 251.997 | 236.607 | 40.00 | 83.00  | 180.00 | 345.00 | 561.00  | 3.204 | 390.181 | 370.040 | 55.00  | 123.00 | 279.00 | 537.00  | 877.00  |
| 0.10 | 3.015 | 0.2595725 | 0.0188190 | 1.00 | 0.90 | 231.112 | 221.806 | 32.00 | 72.75  | 161.00 | 317.00 | 523.00  | 3.204 | 302.105 | 292.267 | 40.00  | 93.00  | 211.00 | 416.00  | 693.00  |
| 0.10 | 3.015 | 0.2595725 | 0.0188190 | 1.00 | 0.80 | 125.861 | 117.091 | 22.00 | 43.00  | 90.00  | 171.00 | 277.00  | 3.204 | 158.414 | 145.652 | 26.00  | 53.00  | 115.00 | 217.00  | 356.00  |
| 0.10 | 3.015 | 0.2595725 | 0.0188190 | 1.00 | 0.70 | 65.209  | 53.677  | 15.00 | 27.00  | 49.00  | 88.00  | 138.00  | 3.204 | 76.187  | 65.681  | 17.00  | 30.00  | 57.00  | 103.00  | 163.00  |
| 0.10 | 3.015 | 0.2595725 | 0.0188190 | 1.00 | 0.60 | 33.833  | 24.926  | 11.00 | 16.00  | 27.00  | 44.00  | 66.00   | 3.204 | 38.032  | 27.842  | 12.00  | 19.00  | 30.00  | 49.00   | 74.00   |
| 0.10 | 3.015 | 0.2595725 | 0.0188190 | 1.00 | 0.50 | 19.308  | 11.050  | 8.00  | 11.00  | 17.00  | 24.00  | 34.00   | 3.204 | 21.053  | 12.270  | 9.00   | 12.00  | 18.00  | 26.00   | 37.00   |
| 0.15 | 3.209 | 0.3224310 | 0.0286744 | 1.00 | 1.00 | 370.480 | 361.538 | 45.00 | 114.00 | 260.00 | 509.00 | 849.10  | 3.387 | 499.810 | 496.093 | 58.00  | 146.00 | 348.00 | 701.00  | 1136.00 |
| 0.15 | 3.209 | 0.3224310 | 0.0286744 | 1.00 | 1.10 | 482.252 | 479.636 | 55.00 | 145.00 | 339.00 | 661.25 | 1102.10 | 3.387 | 656.610 | 638.809 | 74.90  | 194.00 | 462.00 | 915.00  | 1492.10 |
| 0.15 | 3.209 | 0.3224310 | 0.0286744 | 1.00 | 1.20 | 576.483 | 566.114 | 65.00 | 169.75 | 399.00 | 804.25 | 1323.10 | 3.387 | 772.643 | 761.229 | 87.00  | 222.00 | 533.00 | 1064.00 | 1794.00 |
| 0.15 | 3.209 | 0.3224310 | 0.0286744 | 1.00 | 1.30 | 624.094 | 622.550 | 66.00 | 181.00 | 433.00 | 866.25 | 1431.10 | 3.387 | 857.140 | 832.495 | 100.00 | 255.00 | 595.00 | 1190.25 | 1969.00 |
| 0.15 | 3.209 | 0.3224310 | 0.0286744 | 1.00 | 1.40 | 654.202 | 656.188 | 74.00 | 186.00 | 457.00 | 901.25 | 1489.10 | 3.387 | 910.521 | 883.440 | 101.00 | 271.00 | 638.50 | 1276.00 | 2086.10 |
| 0.15 | 3.209 | 0.3224310 | 0.0286744 | 1.00 | 0.90 | 244.912 | 237.596 | 31.00 | 74.00  | 173.00 | 337.00 | 556.00  | 3.387 | 325.858 | 316.699 | 42.00  | 100.00 | 229.00 | 452.00  | 732.00  |
| 0.15 | 3.209 | 0.3224310 | 0.0286744 | 1.00 | 0.80 | 142.762 | 136.873 | 21.00 | 46.00  | 99.00  | 194.00 | 321.10  | 3.387 | 183.974 | 175.148 | 27.00  | 59.00  | 130.00 | 254.00  | 412.00  |
| 0.15 | 3.209 | 0.3224310 | 0.0286744 | 1.00 | 0.70 | 77.750  | 70.424  | 15.00 | 28.00  | 56.00  | 106.00 | 170.00  | 3.387 | 92.936  | 85.486  | 18.00  | 33.00  | 66.00  | 125.00  | 203.00  |
| 0.15 | 3.209 | 0.3224310 | 0.0286744 | 1.00 | 0.60 | 40.318  | 33.280  | 11.00 | 17.00  | 30.00  | 53.00  | 84.00   | 3.387 | 46.946  | 38.611  | 12.00  | 20.00  | 35.00  | 62.00   | 98.00   |
| 0.15 | 3.209 | 0.3224310 | 0.0286744 | 1.00 | 0.50 | 21.570  | 14.660  | 8.00  | 11.00  | 18.00  | 27.00  | 41.00   | 3.387 | 24.166  | 17.055  | 8.00   | 12.00  | 19.00  | 31.00   | 46.00   |

Case 4  
phi=31

|      |       |           |           |      |      |         |         |       |        |        |        |         |       |         |         |       |        |        |         |         |
|------|-------|-----------|-----------|------|------|---------|---------|-------|--------|--------|--------|---------|-------|---------|---------|-------|--------|--------|---------|---------|
| 0.05 | 2.709 | 0.1808844 | 0.0091702 | 1.00 | 1.00 | 370.569 | 357.996 | 51.00 | 117.00 | 262.00 | 512.25 | 835.00  | 2.910 | 500.684 | 492.713 | 65.00 | 153.00 | 349.00 | 686.00  | 1133.10 |
| 0.05 | 2.709 | 0.1808844 | 0.0091702 | 1.00 | 1.10 | 350.110 | 332.849 | 54.00 | 113.00 | 249.00 | 481.00 | 771.10  | 2.910 | 493.559 | 474.594 | 70.00 | 154.00 | 349.00 | 676.00  | 1127.00 |
| 0.05 | 2.709 | 0.1808844 | 0.0091702 | 1.00 | 1.20 | 231.694 | 207.880 | 44.00 | 85.00  | 170.00 | 311.00 | 500.00  | 2.910 | 312.303 | 289.874 | 53.00 | 104.00 | 224.00 | 425.00  | 693.00  |
| 0.05 | 2.709 | 0.1808844 | 0.0091702 | 1.00 | 1.30 | 151.623 | 128.842 | 36.00 | 61.00  | 113.00 | 202.00 | 320.00  | 2.910 | 191.219 | 164.212 | 44.00 | 75.00  | 143.00 | 256.00  | 397.10  |
| 0.05 | 2.709 | 0.1808844 | 0.0091702 | 1.00 | 1.40 | 105.283 | 82.224  | 30.00 | 47.00  | 82.00  | 138.00 | 212.00  | 2.910 | 130.097 | 105.409 | 35.00 | 55.00  | 99.00  | 172.00  | 265.00  |
| 0.05 | 2.709 | 0.1808844 | 0.0091702 | 1.00 | 0.90 | 228.948 | 210.501 | 39.00 | 80.00  | 165.00 | 311.00 | 509.00  | 2.910 | 287.541 | 275.512 | 44.00 | 95.00  | 205.00 | 392.25  | 637.00  |
| 0.05 | 2.709 | 0.1808844 | 0.0091702 | 1.00 | 0.80 | 112.508 | 93.929  | 26.00 | 45.00  | 85.00  | 150.00 | 237.00  | 2.910 | 133.145 | 115.334 | 29.00 | 52.00  | 99.00  | 178.00  | 281.00  |
| 0.05 | 2.709 | 0.1808844 | 0.0091702 | 1.00 | 0.70 | 56.236  | 40.599  | 18.00 | 28.00  | 45.00  | 72.00  | 109.00  | 2.910 | 62.781  | 46.271  | 20.00 | 31.00  | 50.00  | 80.00   | 121.00  |
| 0.05 | 2.709 | 0.1808844 | 0.0091702 | 1.00 | 0.60 | 31.705  | 18.467  | 14.00 | 19.00  | 27.00  | 40.00  | 56.00   | 2.910 | 34.206  | 19.577  | 14.90 | 20.00  | 30.00  | 43.00   | 60.00   |
| 0.05 | 2.709 | 0.1808844 | 0.0091702 | 1.00 | 0.50 | 19.356  | 8.721   | 10.00 | 13.00  | 18.00  | 24.00  | 31.00   | 2.910 | 20.713  | 9.288   | 11.00 | 14.00  | 19.00  | 25.00   | 33.00   |
| 0.10 | 3.027 | 0.2591139 | 0.0188166 | 1.00 | 1.00 | 370.468 | 364.483 | 45.00 | 109.00 | 256.00 | 509.25 | 842.00  | 3.220 | 501.043 | 489.473 | 60.00 | 147.00 | 345.00 | 684.00  | 1135.10 |
| 0.10 | 3.027 | 0.2591139 | 0.0188166 | 1.00 | 1.10 | 461.259 | 449.945 | 56.00 | 140.00 | 321.00 | 641.00 | 1052.00 | 3.220 | 654.708 | 654.771 | 73.00 | 193.00 | 449.00 | 906.00  | 1508.10 |
| 0.10 | 3.027 | 0.2591139 | 0.0188166 | 1.00 | 1.20 | 448.018 | 434.732 | 55.00 | 137.00 | 314.00 | 621.25 | 1012.10 | 3.220 | 678.046 | 669.222 | 80.00 | 202.75 | 476.50 | 928.00  | 1546.00 |
| 0.10 | 3.027 | 0.2591139 | 0.0188166 | 1.00 | 1.30 | 357.580 | 337.733 | 49.00 | 112.00 | 255.00 | 492.00 | 811.00  | 3.220 | 539.884 | 520.543 | 73.00 | 166.00 | 379.00 | 744.00  | 1220.00 |
| 0.10 | 3.027 | 0.2591139 | 0.0188166 | 1.00 | 1.40 | 257.065 | 243.093 | 40.00 | 86.00  | 183.00 | 348.00 | 576.00  | 3.220 | 394.944 | 380.133 | 56.00 | 123.75 | 276.00 | 543.00  | 893.00  |
| 0.10 | 3.027 | 0.2591139 | 0.0188166 | 1.00 | 0.90 | 232.638 | 224.255 | 31.00 | 74.00  | 164.00 | 319.00 | 521.10  | 3.220 | 303.184 | 292.348 | 39.00 | 94.00  | 213.00 | 413.00  | 688.10  |
| 0.10 | 3.027 | 0.2591139 | 0.0188166 | 1.00 | 0.80 | 127.005 | 118.906 | 22.00 | 43.00  | 90.00  | 172.00 | 281.00  | 3.220 | 159.024 | 149.208 | 26.00 | 53.00  | 115.00 | 214.00  | 352.10  |
| 0.10 | 3.027 | 0.2591139 | 0.0188166 | 1.00 | 0.70 | 65.712  | 55.910  | 15.00 | 26.00  | 49.00  | 88.00  | 137.00  | 3.220 | 77.359  | 65.926  | 18.00 | 30.00  | 57.00  | 104.00  | 166.00  |
| 0.10 | 3.027 | 0.2591139 | 0.0188166 | 1.00 | 0.60 | 34.412  | 24.809  | 11.00 | 17.00  | 28.00  | 44.00  | 67.00   | 3.220 | 38.639  | 28.302  | 12.00 | 19.00  | 31.00  | 50.00   | 76.00   |
| 0.10 | 3.027 | 0.2591139 | 0.0188166 | 1.00 | 0.50 | 19.486  | 11.099  | 8.00  | 12.00  | 17.00  | 24.00  | 34.00   | 3.220 | 21.165  | 12.151  | 9.00  | 12.00  | 18.00  | 27.00   | 37.00   |
| 0.15 | 3.238 | 0.3214631 | 0.0286840 | 1.00 | 1.00 | 370.233 | 365.299 | 42.00 | 109.00 | 254.00 | 506.00 | 846.00  | 3.424 | 501.240 | 501.237 | 57.00 | 147.00 | 352.00 | 704.00  | 1159.00 |
| 0.15 | 3.238 | 0.3214631 | 0.0286840 | 1.00 | 1.10 | 486.394 | 489.754 | 55.00 | 144.00 | 339.00 | 671.25 | 1103.00 | 3.424 | 651.695 | 651.918 | 75.00 | 192.00 | 451.00 | 894.00  | 1505.00 |
| 0.15 | 3.238 | 0.3214631 | 0.0286840 | 1.00 | 1.20 | 571.264 | 564.759 | 65.00 | 173.00 | 401.00 | 782.25 | 1308.00 | 3.424 | 781.015 | 772.600 | 85.00 | 226.00 | 538.00 | 1091.00 | 1821.20 |
| 0.15 | 3.238 | 0.3214631 | 0.0286840 | 1.00 | 1.30 | 618.984 | 618.188 | 67.00 | 182.00 | 425.00 | 847.00 | 1420.00 | 3.424 | 853.380 | 826.663 | 93.00 | 254.00 | 600.00 | 1179.00 | 1964.10 |
| 0.15 | 3.238 | 0.3214631 | 0.0286840 | 1.00 | 1.40 | 641.802 | 636.024 | 72.00 | 189.00 | 451.00 | 881.00 | 1474.00 | 3.424 | 884.749 | 861.747 | 97.00 | 260.00 | 619.00 | 1240.00 | 2034.20 |
| 0.15 | 3.238 | 0.3214631 | 0.0286840 | 1.00 | 0.90 | 253.213 | 248.791 | 32.00 | 76.00  | 177.00 | 346.00 | 574.10  | 3.424 | 332.305 | 320.589 | 40.00 | 102.00 | 235.00 | 459.00  | 760.10  |
| 0.15 | 3.238 | 0.3214631 | 0.0286840 | 1.00 | 0.80 | 149.875 | 143.988 | 22.00 | 48.00  | 106.50 | 204.00 | 341.00  | 3.424 | 188.614 | 180.436 | 26.00 | 60.00  | 132.00 | 260.00  | 424.00  |
| 0.15 | 3.238 | 0.3214631 | 0.0286840 | 1.00 | 0.70 | 79.908  | 72.593  | 15.00 | 29.00  | 58.00  | 107.00 | 174.00  | 3.424 | 96.021  | 88.889  | 17.00 | 33.00  | 68.00  | 131.00  | 211.00  |
| 0.15 | 3.238 | 0.3214631 | 0.0286840 | 1.00 | 0.60 | 41.311  | 34.120  | 11.00 | 18.00  | 31.00  | 54.00  | 86.00   | 3.424 | 47.872  | 40.262  | 12.00 | 19.00  | 36.00  | 64.00   | 100.00  |
| 0.15 | 3.238 | 0.3214631 | 0.0286840 | 1.00 | 0.50 | 21.855  | 14.985  | 8.00  | 11.00  | 18.00  | 28.00  | 41.00   | 3.424 | 24.686  | 17.502  | 9.00  | 12.00  | 20.00  | 32.00   | 47.00   |

TABLE S.4. ARL Results of the Max-EWMA control chart when simultaneous shift occurs in the shape2 parameter of beta distribution and shape parameter of UNH distribution ( $\Delta_\delta \in (1.0, 1.1, 1.2, 1.3, 1.4, 0.9, 0.8, 0.7, 0.6, 0.5)$ ,  $\Delta_\alpha \in (1.0, 1.1, 1.2, 1.3, 1.4, 0.9, 0.8, 0.7, 0.6, 0.5)$  when  $X \sim B(\gamma, \delta)$ ,  $T \sim UNH(\alpha, \lambda)$ ,  $\mu = 0.20$ ,  $\alpha_0 = 0.50$ ,  $\lambda_0 = 1.00$ ,  $ARL_0 \in (370, 500)$  and  $\theta_e \in (0.05, 0.10, 0.15)$ )

| $\theta_e$    | $K$   | $EM$      | $VM$      | $\Delta_\delta$ | $\Delta_\alpha$ | $ARL$   | $SDRL$  | $q10$ | $q25$  | $q50$  | $q75$  | $q90$  | $K$           | $ARL$   | $SDRL$  | $q10$ | $q25$  | $q50$  | $q75$  | $q90$   |
|---------------|-------|-----------|-----------|-----------------|-----------------|---------|---------|-------|--------|--------|--------|--------|---------------|---------|---------|-------|--------|--------|--------|---------|
| Case 1        |       |           |           |                 |                 |         |         |       |        |        |        |        |               |         |         |       |        |        |        |         |
| $\phi=290$    |       |           |           |                 |                 |         |         |       |        |        |        |        | $ARL_0 = 500$ |         |         |       |        |        |        |         |
| $ARL_0 = 370$ |       |           |           |                 |                 |         |         |       |        |        |        |        |               |         |         |       |        |        |        |         |
| 0.05          | 2.688 | 0.1811987 | 0.0092639 | 1.00            | 1.00            | 370.013 | 352.085 | 52.00 | 114.00 | 257.00 | 512.00 | 828.10 | 2.893         | 500.757 | 490.403 | 70.00 | 156.00 | 352.50 | 677.00 | 1134.10 |
| 0.05          | 2.688 | 0.1811987 | 0.0092639 | 1.10            | 1.10            | 22.247  | 10.376  | 11.00 | 15.00  | 20.00  | 27.00  | 36.00  | 2.893         | 23.855  | 11.365  | 12.00 | 16.00  | 21.00  | 29.00  | 39.00   |
| 0.05          | 2.688 | 0.1811987 | 0.0092639 | 1.20            | 1.10            | 9.879   | 2.908   | 7.00  | 8.00   | 9.00   | 11.00  | 14.00  | 2.893         | 10.382  | 3.031   | 7.00  | 8.00   | 10.00  | 12.00  | 14.00   |
| 0.05          | 2.688 | 0.1811987 | 0.0092639 | 1.30            | 1.10            | 6.712   | 1.503   | 5.00  | 6.00   | 7.00   | 8.00   | 9.00   | 2.893         | 6.988   | 1.531   | 5.00  | 6.00   | 7.00   | 8.00   | 9.00    |
| 0.05          | 2.688 | 0.1811987 | 0.0092639 | 1.40            | 1.10            | 5.269   | 0.989   | 4.00  | 5.00   | 5.00   | 6.00   | 6.00   | 2.893         | 5.488   | 1.015   | 4.00  | 5.00   | 5.00   | 6.00   | 7.00    |
| 0.05          | 2.688 | 0.1811987 | 0.0092639 | 0.90            | 1.10            | 17.674  | 8.390   | 9.00  | 12.00  | 16.00  | 22.00  | 29.00  | 2.893         | 18.773  | 8.786   | 9.00  | 13.00  | 17.00  | 23.00  | 30.00   |
| 0.05          | 2.688 | 0.1811987 | 0.0092639 | 0.80            | 1.10            | 6.909   | 2.132   | 4.00  | 5.00   | 7.00   | 8.00   | 10.00  | 2.893         | 7.262   | 2.247   | 5.00  | 6.00   | 7.00   | 9.00   | 10.00   |
| 0.05          | 2.688 | 0.1811987 | 0.0092639 | 0.70            | 1.10            | 4.101   | 1.039   | 3.00  | 3.00   | 4.00   | 5.00   | 5.00   | 2.893         | 4.272   | 1.051   | 3.00  | 4.00   | 4.00   | 5.00   | 6.00    |
| 0.05          | 2.688 | 0.1811987 | 0.0092639 | 0.60            | 1.10            | 2.829   | 0.643   | 2.00  | 2.00   | 3.00   | 3.00   | 4.00   | 2.893         | 2.929   | 0.654   | 2.00  | 3.00   | 3.00   | 3.00   | 4.00    |
| 0.05          | 2.688 | 0.1811987 | 0.0092639 | 0.50            | 1.10            | 2.118   | 0.390   | 2.00  | 2.00   | 2.00   | 2.00   | 3.00   | 2.893         | 2.173   | 0.414   | 2.00  | 2.00   | 2.00   | 2.00   | 3.00    |
| 0.05          | 2.688 | 0.1811987 | 0.0092639 | 1.10            | 1.20            | 22.251  | 10.207  | 12.00 | 15.00  | 20.00  | 27.00  | 36.00  | 2.893         | 23.677  | 11.089  | 12.00 | 16.00  | 21.00  | 29.00  | 38.00   |
| 0.05          | 2.688 | 0.1811987 | 0.0092639 | 1.20            | 1.20            | 9.838   | 2.891   | 7.00  | 8.00   | 9.00   | 11.00  | 14.00  | 2.893         | 10.395  | 3.020   | 7.00  | 8.00   | 10.00  | 12.00  | 14.00   |
| 0.05          | 2.688 | 0.1811987 | 0.0092639 | 1.30            | 1.20            | 6.694   | 1.515   | 5.00  | 6.00   | 7.00   | 8.00   | 9.00   | 2.893         | 6.986   | 1.529   | 5.00  | 6.00   | 7.00   | 8.00   | 9.00    |
| 0.05          | 2.688 | 0.1811987 | 0.0092639 | 1.40            | 1.20            | 5.244   | 0.992   | 4.00  | 5.00   | 5.00   | 6.00   | 6.00   | 2.893         | 5.489   | 1.003   | 4.00  | 5.00   | 5.00   | 6.00   | 7.00    |
| 0.05          | 2.688 | 0.1811987 | 0.0092639 | 0.90            | 1.20            | 17.728  | 8.307   | 9.00  | 12.00  | 16.00  | 22.00  | 29.00  | 2.893         | 18.854  | 8.867   | 10.00 | 12.00  | 17.00  | 23.00  | 31.00   |
| 0.05          | 2.688 | 0.1811987 | 0.0092639 | 0.80            | 1.20            | 6.922   | 2.138   | 5.00  | 5.00   | 7.00   | 8.00   | 10.00  | 2.893         | 7.251   | 2.221   | 5.00  | 6.00   | 7.00   | 8.00   | 10.00   |
| 0.05          | 2.688 | 0.1811987 | 0.0092639 | 0.70            | 1.20            | 4.091   | 1.025   | 3.00  | 3.00   | 4.00   | 5.00   | 5.00   | 2.893         | 4.240   | 1.058   | 3.00  | 4.00   | 4.00   | 5.00   | 6.00    |
| 0.05          | 2.688 | 0.1811987 | 0.0092639 | 0.60            | 1.20            | 2.836   | 0.651   | 2.00  | 2.00   | 3.00   | 3.00   | 4.00   | 2.893         | 2.920   | 0.652   | 2.00  | 3.00   | 3.00   | 3.00   | 4.00    |
| 0.05          | 2.688 | 0.1811987 | 0.0092639 | 0.50            | 1.20            | 2.118   | 0.390   | 2.00  | 2.00   | 2.00   | 2.00   | 3.00   | 2.893         | 2.173   | 0.414   | 2.00  | 2.00   | 2.00   | 2.00   | 3.00    |
| 0.05          | 2.688 | 0.1811987 | 0.0092639 | 1.10            | 1.30            | 22.042  | 10.064  | 11.00 | 15.00  | 20.00  | 27.00  | 36.00  | 2.893         | 23.720  | 10.941  | 12.00 | 16.00  | 21.00  | 29.00  | 38.00   |
| 0.05          | 2.688 | 0.1811987 | 0.0092639 | 1.20            | 1.30            | 9.894   | 2.903   | 7.00  | 8.00   | 9.00   | 12.00  | 14.00  | 2.893         | 10.446  | 3.004   | 7.00  | 8.00   | 10.00  | 12.00  | 14.00   |
| 0.05          | 2.688 | 0.1811987 | 0.0092639 | 1.30            | 1.30            | 6.714   | 1.509   | 5.00  | 6.00   | 7.00   | 8.00   | 9.00   | 2.893         | 7.021   | 1.564   | 5.00  | 6.00   | 7.00   | 8.00   | 9.00    |
| 0.05          | 2.688 | 0.1811987 | 0.0092639 | 1.40            | 1.30            | 5.243   | 0.986   | 4.00  | 5.00   | 5.00   | 6.00   | 6.00   | 2.893         | 5.480   | 1.000   | 4.00  | 5.00   | 5.00   | 6.00   | 7.00    |
| 0.05          | 2.688 | 0.1811987 | 0.0092639 | 0.90            | 1.30            | 17.766  | 8.348   | 9.00  | 12.00  | 16.00  | 22.00  | 29.00  | 2.893         | 18.783  | 8.688   | 9.00  | 13.00  | 17.00  | 23.00  | 30.00   |
| 0.05          | 2.688 | 0.1811987 | 0.0092639 | 0.80            | 1.30            | 6.881   | 2.138   | 4.00  | 5.00   | 7.00   | 8.00   | 10.00  | 2.893         | 7.225   | 2.225   | 5.00  | 6.00   | 7.00   | 8.00   | 10.00   |
| 0.05          | 2.688 | 0.1811987 | 0.0092639 | 0.70            | 1.30            | 4.111   | 1.032   | 3.00  | 3.00   | 4.00   | 5.00   | 5.00   | 2.893         | 4.273   | 1.063   | 3.00  | 4.00   | 4.00   | 5.00   | 6.00    |
| 0.05          | 2.688 | 0.1811987 | 0.0092639 | 0.60            | 1.30            | 2.838   | 0.647   | 2.00  | 2.00   | 3.00   | 3.00   | 4.00   | 2.893         | 2.938   | 0.653   | 2.00  | 3.00   | 3.00   | 3.00   | 4.00    |
| 0.05          | 2.688 | 0.1811987 | 0.0092639 | 0.50            | 1.30            | 2.116   | 0.391   | 2.00  | 2.00   | 2.00   | 2.00   | 3.00   | 2.893         | 2.174   | 0.417   | 2.00  | 2.00   | 2.00   | 2.00   | 3.00    |
| 0.05          | 2.688 | 0.1811987 | 0.0092639 | 1.10            | 1.40            | 21.864  | 9.996   | 11.00 | 15.00  | 20.00  | 27.00  | 35.00  | 2.893         | 23.490  | 10.708  | 12.00 | 16.00  | 21.00  | 29.00  | 38.00   |
| 0.05          | 2.688 | 0.1811987 | 0.0092639 | 1.20            | 1.40            | 9.892   | 2.941   | 7.00  | 8.00   | 9.00   | 12.00  | 14.00  | 2.893         | 10.441  | 3.060   | 7.00  | 8.00   | 10.00  | 12.00  | 14.00   |
| 0.05          | 2.688 | 0.1811987 | 0.0092639 | 1.30            | 1.40            | 6.699   | 1.503   | 5.00  | 6.00   | 7.00   | 8.00   | 9.00   | 2.893         | 7.002   | 1.546   | 5.00  | 6.00   | 7.00   | 8.00   | 9.00    |
| 0.05          | 2.688 | 0.1811987 | 0.0092639 | 1.40            | 1.40            | 5.257   | 0.990   | 4.00  | 5.00   | 5.00   | 6.00   | 6.00   | 2.893         | 5.463   | 1.009   | 4.00  | 5.00   | 5.00   | 6.00   | 7.00    |
| 0.05          | 2.688 | 0.1811987 | 0.0092639 | 0.90            | 1.40            | 17.669  | 8.228   | 9.00  | 12.00  | 16.00  | 22.00  | 28.00  | 2.893         | 18.787  | 8.628   | 10.00 | 13.00  | 17.00  | 23.00  | 30.00   |
| 0.05          | 2.688 | 0.1811987 | 0.0092639 | 0.80            | 1.40            | 6.901   | 2.162   | 4.00  | 5.00   | 7.00   | 8.00   | 10.00  | 2.893         | 7.212   | 2.202   | 5.00  | 6.00   | 7.00   | 8.00   | 10.00   |
| 0.05          | 2.688 | 0.1811987 | 0.0092639 | 0.70            | 1.40            | 4.106   | 1.031   | 3.00  | 3.00   | 4.00   | 5.00   | 5.00   | 2.893         | 4.295   | 1.058   | 3.00  | 4.00   | 4.00   | 5.00   | 6.00    |
| 0.05          | 2.688 | 0.1811987 | 0.0092639 | 0.60            | 1.40            | 2.822   | 0.652   | 2.00  | 2.00   | 3.00   | 3.00   | 4.00   | 2.893         | 2.937   | 0.661   | 2.00  | 3.00   | 3.00   | 3.00   | 4.00    |
| 0.05          | 2.688 | 0.1811987 | 0.0092639 | 0.50            | 1.40            | 2.116   | 0.390   | 2.00  | 2.00   | 2.00   | 2.00   | 3.00   | 2.893         | 2.172   | 0.412   | 2.00  | 2.00   | 2.00   | 2.00   | 3.00    |
| 0.05          | 2.688 | 0.1811987 | 0.0092639 | 1.10            | 0.90            | 21.917  | 10.238  | 11.00 | 15.00  | 20.00  | 27.00  | 36.00  | 2.893         | 23.714  | 11.164  | 12.00 | 16.00  | 21.00  | 29.00  | 38.00   |
| 0.05          | 2.688 | 0.1811987 | 0.0092639 | 1.20            | 0.90            | 9.829   | 2.860   | 7.00  | 8.00   | 9.00   | 11.00  | 14.00  | 2.893         | 10.353  | 3.005   | 7.00  | 8.00   | 10.00  | 12.00  | 14.00   |
| 0.05          | 2.688 | 0.1811987 | 0.0092639 | 1.30            | 0.90            | 6.679   | 1.507   | 5.00  | 6.00   | 6.00   | 8.00   | 9.00   | 2.893         | 6.976   | 1.524   | 5.00  | 6.00   | 7.00   | 8.00   | 9.00    |
| 0.05          | 2.688 | 0.1811987 | 0.0092639 | 1.40            | 0.90            | 5.276   | 1.004   | 4.00  | 5.00   | 5.00   | 6.00   | 7.00   | 2.893         | 5.485   | 1.008   | 4.00  | 5.00   | 5.00   | 6.00   | 7.00    |
| 0.05          | 2.688 | 0.1811987 | 0.0092639 | 0.90            | 0.90            | 17.660  | 8.282   | 9.00  | 12.00  | 16.00  | 22.00  | 28.00  | 2.893         | 18.713  | 8.708   | 10.00 | 12.00  | 17.00  | 23.00  | 30.00   |
| 0.05          | 2.688 | 0.1811987 | 0.0092639 | 0.80            | 0.90            | 6.922   | 2.130   | 5.00  | 5.00   | 7.00   | 8.00   | 10.00  | 2.893         | 7.237   | 2.209   | 5.00  | 6.00   | 7.00   | 9.00   | 10.00   |
| 0.05          | 2.688 | 0.1811987 | 0.0092639 | 0.70            | 0.90            | 4.113   | 1.046   | 3.00  | 3.00   | 4.00   | 5.00   | 5.00   | 2.893         | 4.263   | 1.047   | 3.00  | 4.00   | 4.00   | 5.00   | 6.00    |
| 0.05          | 2.688 | 0.1811987 | 0.0092639 | 0.60            | 0.90            | 2.826   | 0.640   | 2.00  | 2.00   | 3.00   | 3.00   | 4.00   | 2.893         | 2.933   | 0.651   | 2.00  | 3.00   | 3.00   | 3.00   | 4.00    |
| 0.05          | 2.688 | 0.1811987 | 0.0092639 | 0.50            | 0.90            | 2.110   | 0.385   | 2.00  | 2.00   | 2.00   | 2.00   | 3.00   | 2.893         | 2.173   | 0.412   | 2.00  | 2.00   | 2.00   | 2.00   | 3.00    |
| 0.05          | 2.688 | 0.1811987 | 0.0092639 | 1.10            | 0.80            | 21.460  | 9.807   | 11.00 | 15.00  | 19.00  | 26.00  | 34.00  | 2.893         | 23.266  | 10.863  | 12.00 | 16.00  | 21.00  | 28.00  | 37.00   |

MAXEWMA

|      |       |           |           |      |      |         |         |       |        |        |        |        |       |         |         |       |        |        |        |         |
|------|-------|-----------|-----------|------|------|---------|---------|-------|--------|--------|--------|--------|-------|---------|---------|-------|--------|--------|--------|---------|
| 0.05 | 2.688 | 0.1811987 | 0.0092639 | 1.20 | 0.80 | 9.832   | 2.891   | 7.00  | 8.00   | 9.00   | 11.00  | 14.00  | 2.893 | 10.359  | 2.997   | 7.00  | 8.00   | 10.00  | 12.00  | 14.00   |
| 0.05 | 2.688 | 0.1811987 | 0.0092639 | 1.30 | 0.80 | 6.687   | 1.521   | 5.00  | 6.00   | 6.00   | 8.00   | 9.00   | 2.893 | 6.996   | 1.545   | 5.00  | 6.00   | 7.00   | 8.00   | 9.00    |
| 0.05 | 2.688 | 0.1811987 | 0.0092639 | 1.40 | 0.80 | 5.253   | 0.996   | 4.00  | 5.00   | 5.00   | 6.00   | 7.00   | 2.893 | 5.474   | 1.025   | 4.00  | 5.00   | 5.00   | 6.00   | 7.00    |
| 0.05 | 2.688 | 0.1811987 | 0.0092639 | 0.90 | 0.80 | 17.498  | 8.030   | 9.00  | 12.00  | 16.00  | 22.00  | 28.00  | 2.893 | 18.591  | 8.668   | 9.00  | 12.00  | 17.00  | 23.00  | 30.00   |
| 0.05 | 2.688 | 0.1811987 | 0.0092639 | 0.80 | 0.80 | 6.946   | 2.130   | 5.00  | 5.00   | 7.00   | 8.00   | 10.00  | 2.893 | 7.262   | 2.245   | 5.00  | 6.00   | 7.00   | 8.25   | 10.00   |
| 0.05 | 2.688 | 0.1811987 | 0.0092639 | 0.70 | 0.80 | 4.122   | 1.023   | 3.00  | 3.00   | 4.00   | 5.00   | 5.00   | 2.893 | 4.285   | 1.049   | 3.00  | 4.00   | 4.00   | 5.00   | 6.00    |
| 0.05 | 2.688 | 0.1811987 | 0.0092639 | 0.60 | 0.80 | 2.830   | 0.640   | 2.00  | 2.00   | 3.00   | 3.00   | 4.00   | 2.893 | 2.939   | 0.661   | 2.00  | 3.00   | 3.00   | 3.00   | 4.00    |
| 0.05 | 2.688 | 0.1811987 | 0.0092639 | 0.50 | 0.80 | 2.116   | 0.391   | 2.00  | 2.00   | 2.00   | 2.00   | 3.00   | 2.893 | 2.172   | 0.414   | 2.00  | 2.00   | 2.00   | 2.00   | 3.00    |
| 0.05 | 2.688 | 0.1811987 | 0.0092639 | 1.10 | 0.70 | 20.713  | 9.196   | 11.00 | 14.00  | 19.00  | 25.00  | 33.00  | 2.893 | 22.183  | 9.926   | 12.00 | 15.00  | 20.00  | 27.00  | 35.00   |
| 0.05 | 2.688 | 0.1811987 | 0.0092639 | 1.20 | 0.70 | 9.826   | 2.899   | 7.00  | 8.00   | 9.00   | 11.00  | 14.00  | 2.893 | 10.271  | 3.001   | 7.00  | 8.00   | 10.00  | 12.00  | 14.00   |
| 0.05 | 2.688 | 0.1811987 | 0.0092639 | 1.30 | 0.70 | 6.684   | 1.498   | 5.00  | 6.00   | 6.00   | 8.00   | 9.00   | 2.893 | 6.998   | 1.572   | 5.00  | 6.00   | 7.00   | 8.00   | 9.00    |
| 0.05 | 2.688 | 0.1811987 | 0.0092639 | 1.40 | 0.70 | 5.243   | 0.986   | 4.00  | 5.00   | 5.00   | 6.00   | 6.00   | 2.893 | 5.482   | 1.009   | 4.00  | 5.00   | 5.00   | 6.00   | 7.00    |
| 0.05 | 2.688 | 0.1811987 | 0.0092639 | 0.90 | 0.70 | 16.935  | 7.566   | 9.00  | 12.00  | 16.00  | 21.00  | 27.00  | 2.893 | 18.109  | 8.187   | 9.00  | 12.00  | 16.00  | 22.00  | 29.00   |
| 0.05 | 2.688 | 0.1811987 | 0.0092639 | 0.80 | 0.70 | 6.930   | 2.157   | 4.00  | 5.00   | 7.00   | 8.00   | 10.00  | 2.893 | 7.200   | 2.210   | 5.00  | 6.00   | 7.00   | 8.00   | 10.00   |
| 0.05 | 2.688 | 0.1811987 | 0.0092639 | 0.70 | 0.70 | 4.108   | 1.029   | 3.00  | 3.00   | 4.00   | 5.00   | 5.00   | 2.893 | 4.291   | 1.063   | 3.00  | 4.00   | 4.00   | 5.00   | 6.00    |
| 0.05 | 2.688 | 0.1811987 | 0.0092639 | 0.60 | 0.70 | 2.829   | 0.649   | 2.00  | 2.00   | 3.00   | 3.00   | 4.00   | 2.893 | 2.928   | 0.649   | 2.00  | 3.00   | 3.00   | 3.00   | 4.00    |
| 0.05 | 2.688 | 0.1811987 | 0.0092639 | 0.50 | 0.70 | 2.118   | 0.394   | 2.00  | 2.00   | 2.00   | 2.00   | 3.00   | 2.893 | 2.171   | 0.409   | 2.00  | 2.00   | 2.00   | 2.00   | 3.00    |
| 0.05 | 2.688 | 0.1811987 | 0.0092639 | 1.10 | 0.60 | 18.736  | 7.642   | 10.00 | 13.00  | 17.00  | 23.00  | 29.00  | 2.893 | 20.167  | 8.400   | 11.00 | 14.00  | 19.00  | 25.00  | 31.00   |
| 0.05 | 2.688 | 0.1811987 | 0.0092639 | 1.20 | 0.60 | 9.752   | 2.813   | 7.00  | 8.00   | 9.00   | 11.00  | 13.00  | 2.893 | 10.348  | 2.941   | 7.00  | 8.00   | 10.00  | 12.00  | 14.00   |
| 0.05 | 2.688 | 0.1811987 | 0.0092639 | 1.30 | 0.60 | 6.692   | 1.489   | 5.00  | 6.00   | 6.00   | 8.00   | 9.00   | 2.893 | 6.968   | 1.531   | 5.00  | 6.00   | 7.00   | 8.00   | 9.00    |
| 0.05 | 2.688 | 0.1811987 | 0.0092639 | 1.40 | 0.60 | 5.252   | 0.987   | 4.00  | 5.00   | 5.00   | 6.00   | 6.00   | 2.893 | 5.495   | 1.018   | 4.00  | 5.00   | 5.00   | 6.00   | 7.00    |
| 0.05 | 2.688 | 0.1811987 | 0.0092639 | 0.90 | 0.60 | 15.864  | 6.722   | 9.00  | 11.00  | 15.00  | 19.00  | 25.00  | 2.893 | 16.862  | 7.119   | 9.00  | 12.00  | 16.00  | 21.00  | 26.00   |
| 0.05 | 2.688 | 0.1811987 | 0.0092639 | 0.80 | 0.60 | 6.919   | 2.127   | 4.00  | 5.00   | 7.00   | 8.00   | 10.00  | 2.893 | 7.213   | 2.208   | 5.00  | 6.00   | 7.00   | 8.00   | 10.00   |
| 0.05 | 2.688 | 0.1811987 | 0.0092639 | 0.70 | 0.60 | 4.110   | 1.036   | 3.00  | 3.00   | 4.00   | 5.00   | 5.00   | 2.893 | 4.264   | 1.057   | 3.00  | 4.00   | 4.00   | 5.00   | 6.00    |
| 0.05 | 2.688 | 0.1811987 | 0.0092639 | 0.60 | 0.60 | 2.814   | 0.639   | 2.00  | 2.00   | 3.00   | 3.00   | 4.00   | 2.893 | 2.932   | 0.648   | 2.00  | 3.00   | 3.00   | 3.00   | 4.00    |
| 0.05 | 2.688 | 0.1811987 | 0.0092639 | 0.50 | 0.60 | 2.114   | 0.385   | 2.00  | 2.00   | 2.00   | 2.00   | 3.00   | 2.893 | 2.168   | 0.412   | 2.00  | 2.00   | 2.00   | 2.00   | 3.00    |
| 0.05 | 2.688 | 0.1811987 | 0.0092639 | 1.10 | 0.50 | 15.641  | 5.684   | 9.00  | 12.00  | 15.00  | 19.00  | 23.00  | 2.893 | 16.759  | 6.141   | 10.00 | 12.00  | 16.00  | 20.00  | 25.00   |
| 0.05 | 2.688 | 0.1811987 | 0.0092639 | 1.20 | 0.50 | 9.573   | 2.644   | 7.00  | 8.00   | 9.00   | 11.00  | 13.00  | 2.893 | 10.130  | 2.754   | 7.00  | 8.00   | 10.00  | 12.00  | 14.00   |
| 0.05 | 2.688 | 0.1811987 | 0.0092639 | 1.30 | 0.50 | 6.649   | 1.473   | 5.00  | 6.00   | 6.00   | 7.00   | 9.00   | 2.893 | 6.991   | 1.531   | 5.00  | 6.00   | 7.00   | 8.00   | 9.00    |
| 0.05 | 2.688 | 0.1811987 | 0.0092639 | 1.40 | 0.50 | 5.261   | 0.985   | 4.00  | 5.00   | 5.00   | 6.00   | 7.00   | 2.893 | 5.477   | 1.007   | 4.00  | 5.00   | 5.00   | 6.00   | 7.00    |
| 0.05 | 2.688 | 0.1811987 | 0.0092639 | 0.90 | 0.50 | 13.981  | 5.146   | 8.00  | 10.00  | 13.00  | 17.00  | 21.00  | 2.893 | 14.938  | 5.462   | 9.00  | 11.00  | 14.00  | 18.00  | 22.00   |
| 0.05 | 2.688 | 0.1811987 | 0.0092639 | 0.80 | 0.50 | 6.889   | 2.112   | 4.00  | 5.00   | 7.00   | 8.00   | 10.00  | 2.893 | 7.192   | 2.148   | 5.00  | 6.00   | 7.00   | 8.00   | 10.00   |
| 0.05 | 2.688 | 0.1811987 | 0.0092639 | 0.70 | 0.50 | 4.116   | 1.037   | 3.00  | 3.00   | 4.00   | 5.00   | 5.00   | 2.893 | 4.281   | 1.060   | 3.00  | 4.00   | 4.00   | 5.00   | 6.00    |
| 0.05 | 2.688 | 0.1811987 | 0.0092639 | 0.60 | 0.50 | 2.829   | 0.644   | 2.00  | 2.00   | 3.00   | 3.00   | 4.00   | 2.893 | 2.917   | 0.647   | 2.00  | 3.00   | 3.00   | 3.00   | 4.00    |
| 0.05 | 2.688 | 0.1811987 | 0.0092639 | 0.50 | 0.50 | 2.120   | 0.386   | 2.00  | 2.00   | 2.00   | 2.00   | 3.00   | 2.893 | 2.174   | 0.415   | 2.00  | 2.00   | 2.00   | 2.00   | 3.00    |
| 0.10 | 3.016 | 0.2591350 | 0.0188482 | 1.00 | 1.00 | 371.343 | 361.678 | 46.00 | 115.00 | 268.00 | 518.00 | 840.00 | 3.203 | 499.233 | 498.621 | 58.00 | 144.00 | 344.50 | 692.00 | 1142.10 |
| 0.10 | 3.016 | 0.2591350 | 0.0188482 | 1.10 | 1.10 | 23.406  | 14.421  | 10.00 | 13.00  | 20.00  | 29.00  | 42.00  | 3.203 | 25.695  | 16.272  | 10.00 | 14.00  | 21.00  | 33.00  | 47.00   |
| 0.10 | 3.016 | 0.2591350 | 0.0188482 | 1.20 | 1.10 | 8.682   | 3.103   | 5.00  | 6.00   | 8.00   | 10.00  | 13.00  | 3.203 | 9.158   | 3.352   | 6.00  | 7.00   | 8.00   | 11.00  | 14.00   |
| 0.10 | 3.016 | 0.2591350 | 0.0188482 | 1.30 | 1.10 | 5.638   | 1.546   | 4.00  | 5.00   | 5.00   | 6.00   | 8.00   | 3.203 | 5.892   | 1.596   | 4.00  | 5.00   | 6.00   | 7.00   | 8.00    |
| 0.10 | 3.016 | 0.2591350 | 0.0188482 | 1.40 | 1.10 | 4.348   | 0.971   | 3.00  | 4.00   | 4.00   | 5.00   | 6.00   | 3.203 | 4.522   | 0.993   | 3.00  | 4.00   | 4.00   | 5.00   | 6.00    |
| 0.10 | 3.016 | 0.2591350 | 0.0188482 | 0.90 | 1.10 | 17.143  | 10.161  | 7.00  | 10.00  | 15.00  | 22.00  | 30.00  | 3.203 | 18.371  | 10.806  | 8.00  | 11.00  | 16.00  | 23.00  | 32.00   |
| 0.10 | 3.016 | 0.2591350 | 0.0188482 | 0.80 | 1.10 | 5.829   | 2.152   | 3.00  | 4.00   | 5.00   | 7.00   | 9.00   | 3.203 | 6.076   | 2.232   | 4.00  | 5.00   | 6.00   | 7.00   | 9.00    |
| 0.10 | 3.016 | 0.2591350 | 0.0188482 | 0.70 | 1.10 | 3.379   | 0.970   | 2.00  | 3.00   | 3.00   | 4.00   | 5.00   | 3.203 | 3.487   | 1.005   | 2.00  | 3.00   | 3.00   | 4.00   | 5.00    |
| 0.10 | 3.016 | 0.2591350 | 0.0188482 | 0.60 | 1.10 | 2.312   | 0.571   | 2.00  | 2.00   | 2.00   | 3.00   | 3.00   | 3.203 | 2.387   | 0.590   | 2.00  | 2.00   | 2.00   | 3.00   | 3.00    |
| 0.10 | 3.016 | 0.2591350 | 0.0188482 | 0.50 | 1.10 | 1.776   | 0.465   | 1.00  | 2.00   | 2.00   | 2.00   | 2.00   | 3.203 | 1.835   | 0.445   | 1.00  | 2.00   | 2.00   | 2.00   | 2.00    |
| 0.10 | 3.016 | 0.2591350 | 0.0188482 | 1.10 | 1.20 | 23.462  | 14.571  | 9.00  | 13.00  | 20.00  | 29.00  | 43.00  | 3.203 | 25.833  | 16.280  | 10.00 | 14.00  | 22.00  | 32.00  | 47.00   |
| 0.10 | 3.016 | 0.2591350 | 0.0188482 | 1.20 | 1.20 | 8.681   | 3.146   | 5.00  | 6.00   | 8.00   | 10.00  | 13.00  | 3.203 | 9.211   | 3.388   | 6.00  | 7.00   | 9.00   | 11.00  | 14.00   |
| 0.10 | 3.016 | 0.2591350 | 0.0188482 | 1.30 | 1.20 | 5.619   | 1.527   | 4.00  | 5.00   | 5.00   | 6.00   | 8.00   | 3.203 | 5.898   | 1.607   | 4.00  | 5.00   | 6.00   | 7.00   | 8.00    |
| 0.10 | 3.016 | 0.2591350 | 0.0188482 | 1.40 | 1.20 | 4.336   | 0.976   | 3.00  | 4.00   | 4.00   | 5.00   | 6.00   | 3.203 | 4.517   | 0.998   | 3.00  | 4.00   | 4.00   | 5.00   | 6.00    |
| 0.10 | 3.016 | 0.2591350 | 0.0188482 | 0.90 | 1.20 | 17.171  | 10.079  | 7.00  | 10.00  | 15.00  | 22.00  | 30.00  | 3.203 | 18.095  | 10.866  | 7.00  | 10.00  | 16.00  | 23.00  | 32.00   |
| 0.10 | 3.016 | 0.2591350 | 0.0188482 | 0.80 | 1.20 | 5.860   | 2.169   | 3.00  | 4.00   | 5.00   | 7.00   | 9.00   | 3.203 | 6.123   | 2.249   | 4.00  | 5.00   | 6.00   | 7.00   | 9.00    |
| 0.10 | 3.016 | 0.2591350 | 0.0188482 | 0.70 | 1.20 | 3.359   | 0.974   | 2.00  | 3.00   | 3.00   | 4.00   | 5.00   | 3.203 | 3.484   | 1.007   | 2.00  | 3.00   | 3.00   | 4.00   | 5.00    |
| 0.10 | 3.016 | 0.2591350 | 0.0188482 | 0.60 | 1.20 | 2.320   | 0.565   | 2.00  | 2.00   | 2.00   | 3.00   | 3.00   | 3.203 | 2.381   | 0.586   | 2.00  | 2.00   | 2.00   | 3.00   | 3.00    |
| 0.10 | 3.016 | 0.2591350 | 0.0188482 | 0.50 | 1.20 | 1.774   | 0.468   | 1.00  | 2.00   | 2.00   | 2.00   | 2.00   | 3.203 | 1.831   | 0.437   | 1.00  | 2.00   | 2.00   | 2.00   | 2.00    |
| 0.10 | 3.016 | 0.2591350 | 0.0188482 | 1.10 | 1.30 | 23.469  | 14.513  | 10.00 | 13.00  | 20.00  | 30.00  | 42.00  | 3.203 | 25.750  | 15.970  | 10.00 | 15.00  | 22.00  | 33.00  | 46.00   |
| 0.10 | 3.016 | 0.2591350 | 0.0188482 | 1.20 | 1.30 | 8.726   | 3.165   | 5.00  | 6.00   | 8.00   | 10.00  | 13.00  | 3.203 | 9.249   | 3.360   | 6.00  | 7.00   | 9.00   | 11.00  | 14.00   |
| 0.10 | 3.016 | 0.2591350 | 0.0188482 | 1.30 | 1.30 | 5.632   | 1.533   | 4.00  | 5.00   | 5.00   | 6.00   | 8.00   | 3.203 | 5.906   | 1.617   | 4.00  | 5.00   | 6.00   | 7.00   | 8.00    |
| 0.10 | 3.016 | 0.2591350 | 0.0188482 | 1.40 | 1.30 | 4.334   | 0.976   | 3.00  | 4.00   | 4.00   | 5.00   | 6.00   | 3.203 | 4.529   | 1.010   |       |        |        |        |         |

|      |       |           |           |      |      |         |         |       |        |        |        |        |       |         |         |       |        |        |        |         |
|------|-------|-----------|-----------|------|------|---------|---------|-------|--------|--------|--------|--------|-------|---------|---------|-------|--------|--------|--------|---------|
| 0.10 | 3.016 | 0.2591350 | 0.0188482 | 0.50 | 1.30 | 1.776   | 0.463   | 1.00  | 2.00   | 2.00   | 2.00   | 2.00   | 3.203 | 1.834   | 0.443   | 1.00  | 2.00   | 2.00   | 2.00   | 2.00    |
| 0.10 | 3.016 | 0.2591350 | 0.0188482 | 1.10 | 1.40 | 23.279  | 14.254  | 10.00 | 13.00  | 20.00  | 29.00  | 42.00  | 3.203 | 25.895  | 16.277  | 10.00 | 14.00  | 22.00  | 33.00  | 47.00   |
| 0.10 | 3.016 | 0.2591350 | 0.0188482 | 1.20 | 1.40 | 8.776   | 3.282   | 5.00  | 6.00   | 8.00   | 10.00  | 13.00  | 3.203 | 9.207   | 3.432   | 6.00  | 7.00   | 9.00   | 11.00  | 14.00   |
| 0.10 | 3.016 | 0.2591350 | 0.0188482 | 1.30 | 1.40 | 5.645   | 1.531   | 4.00  | 5.00   | 5.00   | 6.00   | 8.00   | 3.203 | 5.907   | 1.594   | 4.00  | 5.00   | 6.00   | 7.00   | 8.00    |
| 0.10 | 3.016 | 0.2591350 | 0.0188482 | 1.40 | 1.40 | 4.362   | 0.980   | 3.00  | 4.00   | 4.00   | 5.00   | 6.00   | 3.203 | 4.509   | 1.009   | 3.00  | 4.00   | 4.00   | 5.00   | 6.00    |
| 0.10 | 3.016 | 0.2591350 | 0.0188482 | 0.90 | 1.40 | 16.950  | 9.852   | 7.00  | 10.00  | 15.00  | 21.00  | 30.00  | 3.203 | 18.565  | 11.152  | 8.00  | 11.00  | 16.00  | 23.00  | 33.00   |
| 0.10 | 3.016 | 0.2591350 | 0.0188482 | 0.80 | 1.40 | 5.840   | 2.164   | 3.00  | 4.00   | 5.00   | 7.00   | 9.00   | 3.203 | 6.130   | 2.247   | 4.00  | 5.00   | 6.00   | 7.00   | 9.00    |
| 0.10 | 3.016 | 0.2591350 | 0.0188482 | 0.70 | 1.40 | 3.381   | 0.987   | 2.00  | 3.00   | 3.00   | 4.00   | 5.00   | 3.203 | 3.474   | 0.995   | 2.00  | 3.00   | 3.00   | 4.00   | 5.00    |
| 0.10 | 3.016 | 0.2591350 | 0.0188482 | 0.60 | 1.40 | 2.313   | 0.564   | 2.00  | 2.00   | 2.00   | 3.00   | 3.00   | 3.203 | 2.393   | 0.583   | 2.00  | 2.00   | 2.00   | 3.00   | 3.00    |
| 0.10 | 3.016 | 0.2591350 | 0.0188482 | 0.50 | 1.40 | 1.776   | 0.469   | 1.00  | 2.00   | 2.00   | 2.00   | 2.00   | 3.203 | 1.841   | 0.443   | 1.00  | 2.00   | 2.00   | 2.00   | 2.00    |
| 0.10 | 3.016 | 0.2591350 | 0.0188482 | 1.10 | 0.90 | 23.355  | 14.480  | 9.00  | 13.00  | 20.00  | 29.00  | 42.00  | 3.203 | 25.155  | 15.902  | 10.00 | 14.00  | 21.00  | 32.00  | 46.00   |
| 0.10 | 3.016 | 0.2591350 | 0.0188482 | 1.20 | 0.90 | 8.727   | 3.188   | 5.00  | 6.00   | 8.00   | 10.00  | 13.00  | 3.203 | 9.237   | 3.328   | 6.00  | 7.00   | 9.00   | 11.00  | 14.00   |
| 0.10 | 3.016 | 0.2591350 | 0.0188482 | 1.30 | 0.90 | 5.651   | 1.533   | 4.00  | 5.00   | 5.00   | 7.00   | 8.00   | 3.203 | 5.927   | 1.591   | 4.00  | 5.00   | 6.00   | 7.00   | 8.00    |
| 0.10 | 3.016 | 0.2591350 | 0.0188482 | 1.40 | 0.90 | 4.330   | 0.964   | 3.00  | 4.00   | 4.00   | 5.00   | 6.00   | 3.203 | 4.517   | 1.010   | 3.00  | 4.00   | 4.00   | 5.00   | 6.00    |
| 0.10 | 3.016 | 0.2591350 | 0.0188482 | 0.90 | 0.90 | 16.759  | 9.798   | 7.00  | 10.00  | 14.00  | 21.00  | 30.00  | 3.203 | 18.110  | 10.763  | 8.00  | 11.00  | 15.00  | 23.00  | 32.00   |
| 0.10 | 3.016 | 0.2591350 | 0.0188482 | 0.80 | 0.90 | 5.836   | 2.144   | 3.00  | 4.00   | 5.00   | 7.00   | 9.00   | 3.203 | 6.087   | 2.233   | 4.00  | 4.00   | 6.00   | 7.00   | 9.00    |
| 0.10 | 3.016 | 0.2591350 | 0.0188482 | 0.70 | 0.90 | 3.363   | 0.968   | 2.00  | 3.00   | 3.00   | 4.00   | 5.00   | 3.203 | 3.492   | 1.006   | 2.00  | 3.00   | 3.00   | 4.00   | 5.00    |
| 0.10 | 3.016 | 0.2591350 | 0.0188482 | 0.60 | 0.90 | 2.313   | 0.558   | 2.00  | 2.00   | 2.00   | 3.00   | 3.00   | 3.203 | 2.391   | 0.592   | 2.00  | 2.00   | 2.00   | 3.00   | 3.00    |
| 0.10 | 3.016 | 0.2591350 | 0.0188482 | 0.50 | 0.90 | 1.778   | 0.460   | 1.00  | 2.00   | 2.00   | 2.00   | 2.00   | 3.203 | 1.842   | 0.433   | 1.00  | 2.00   | 2.00   | 2.00   | 2.00    |
| 0.10 | 3.016 | 0.2591350 | 0.0188482 | 1.10 | 0.80 | 22.270  | 13.329  | 9.00  | 13.00  | 19.00  | 28.00  | 40.00  | 3.203 | 24.691  | 14.976  | 10.00 | 14.00  | 21.00  | 31.00  | 44.00   |
| 0.10 | 3.016 | 0.2591350 | 0.0188482 | 1.20 | 0.80 | 8.745   | 3.201   | 5.00  | 6.00   | 8.00   | 10.00  | 13.00  | 3.203 | 9.201   | 3.385   | 6.00  | 7.00   | 9.00   | 11.00  | 14.00   |
| 0.10 | 3.016 | 0.2591350 | 0.0188482 | 1.30 | 0.80 | 5.654   | 1.510   | 4.00  | 5.00   | 5.00   | 7.00   | 8.00   | 3.203 | 5.897   | 1.573   | 4.00  | 5.00   | 6.00   | 7.00   | 8.00    |
| 0.10 | 3.016 | 0.2591350 | 0.0188482 | 1.40 | 0.80 | 4.345   | 0.961   | 3.00  | 4.00   | 4.00   | 5.00   | 6.00   | 3.203 | 4.527   | 1.007   | 3.00  | 4.00   | 4.00   | 5.00   | 6.00    |
| 0.10 | 3.016 | 0.2591350 | 0.0188482 | 0.90 | 0.80 | 16.573  | 9.641   | 7.00  | 10.00  | 14.00  | 21.00  | 29.00  | 3.203 | 17.884  | 10.558  | 8.00  | 10.00  | 15.00  | 22.00  | 31.00   |
| 0.10 | 3.016 | 0.2591350 | 0.0188482 | 0.80 | 0.80 | 5.866   | 2.157   | 4.00  | 4.00   | 5.00   | 7.00   | 9.00   | 3.203 | 6.081   | 2.223   | 4.00  | 4.00   | 6.00   | 7.00   | 9.00    |
| 0.10 | 3.016 | 0.2591350 | 0.0188482 | 0.70 | 0.80 | 3.378   | 0.990   | 2.00  | 3.00   | 3.00   | 4.00   | 5.00   | 3.203 | 3.499   | 1.012   | 2.00  | 3.00   | 3.00   | 4.00   | 5.00    |
| 0.10 | 3.016 | 0.2591350 | 0.0188482 | 0.60 | 0.80 | 2.316   | 0.575   | 2.00  | 2.00   | 2.00   | 3.00   | 3.00   | 3.203 | 2.390   | 0.593   | 2.00  | 2.00   | 2.00   | 3.00   | 3.00    |
| 0.10 | 3.016 | 0.2591350 | 0.0188482 | 0.50 | 0.80 | 1.778   | 0.466   | 1.00  | 2.00   | 2.00   | 2.00   | 2.00   | 3.203 | 1.839   | 0.441   | 1.00  | 2.00   | 2.00   | 2.00   | 2.00    |
| 0.10 | 3.016 | 0.2591350 | 0.0188482 | 1.10 | 0.70 | 20.649  | 11.966  | 9.00  | 12.00  | 18.00  | 26.00  | 37.00  | 3.203 | 23.040  | 13.824  | 10.00 | 13.00  | 20.00  | 29.00  | 41.00   |
| 0.10 | 3.016 | 0.2591350 | 0.0188482 | 1.20 | 0.70 | 8.683   | 3.123   | 5.00  | 6.00   | 8.00   | 10.00  | 13.00  | 3.203 | 9.179   | 3.332   | 6.00  | 7.00   | 9.00   | 11.00  | 14.00   |
| 0.10 | 3.016 | 0.2591350 | 0.0188482 | 1.30 | 0.70 | 5.641   | 1.544   | 4.00  | 5.00   | 5.00   | 6.00   | 8.00   | 3.203 | 5.899   | 1.616   | 4.00  | 5.00   | 6.00   | 7.00   | 8.00    |
| 0.10 | 3.016 | 0.2591350 | 0.0188482 | 1.40 | 0.70 | 4.340   | 0.972   | 3.00  | 4.00   | 4.00   | 5.00   | 6.00   | 3.203 | 4.531   | 1.004   | 3.00  | 4.00   | 4.00   | 5.00   | 6.00    |
| 0.10 | 3.016 | 0.2591350 | 0.0188482 | 0.90 | 0.70 | 15.992  | 9.069   | 7.00  | 10.00  | 14.00  | 20.00  | 28.00  | 3.203 | 17.194  | 9.589   | 7.00  | 10.00  | 15.00  | 22.00  | 30.00   |
| 0.10 | 3.016 | 0.2591350 | 0.0188482 | 0.80 | 0.70 | 5.831   | 2.169   | 3.00  | 4.00   | 5.00   | 7.00   | 9.00   | 3.203 | 6.071   | 2.219   | 4.00  | 5.00   | 6.00   | 7.00   | 9.00    |
| 0.10 | 3.016 | 0.2591350 | 0.0188482 | 0.70 | 0.70 | 3.359   | 0.974   | 2.00  | 3.00   | 3.00   | 4.00   | 5.00   | 3.203 | 3.502   | 1.006   | 2.00  | 3.00   | 3.00   | 4.00   | 5.00    |
| 0.10 | 3.016 | 0.2591350 | 0.0188482 | 0.60 | 0.70 | 2.312   | 0.574   | 2.00  | 2.00   | 2.00   | 3.00   | 3.00   | 3.203 | 2.386   | 0.588   | 2.00  | 2.00   | 2.00   | 3.00   | 3.00    |
| 0.10 | 3.016 | 0.2591350 | 0.0188482 | 0.50 | 0.70 | 1.784   | 0.463   | 1.00  | 2.00   | 2.00   | 2.00   | 2.00   | 3.203 | 1.834   | 0.442   | 1.00  | 2.00   | 2.00   | 2.00   | 2.00    |
| 0.10 | 3.016 | 0.2591350 | 0.0188482 | 1.10 | 0.60 | 18.215  | 9.866   | 8.00  | 11.00  | 16.00  | 23.00  | 31.00  | 3.203 | 20.077  | 10.965  | 9.00  | 12.00  | 17.00  | 25.00  | 35.00   |
| 0.10 | 3.016 | 0.2591350 | 0.0188482 | 1.20 | 0.60 | 8.573   | 3.037   | 5.00  | 6.00   | 8.00   | 10.00  | 13.00  | 3.203 | 9.009   | 3.200   | 6.00  | 7.00   | 8.00   | 11.00  | 13.00   |
| 0.10 | 3.016 | 0.2591350 | 0.0188482 | 1.30 | 0.60 | 5.651   | 1.536   | 4.00  | 5.00   | 5.00   | 6.00   | 8.00   | 3.203 | 5.877   | 1.585   | 4.00  | 5.00   | 6.00   | 7.00   | 8.00    |
| 0.10 | 3.016 | 0.2591350 | 0.0188482 | 1.40 | 0.60 | 4.341   | 0.973   | 3.00  | 4.00   | 4.00   | 5.00   | 6.00   | 3.203 | 4.530   | 1.016   | 3.00  | 4.00   | 4.00   | 5.00   | 6.00    |
| 0.10 | 3.016 | 0.2591350 | 0.0188482 | 0.90 | 0.60 | 14.750  | 7.750   | 7.00  | 9.00   | 13.00  | 18.00  | 25.00  | 3.203 | 15.810  | 8.431   | 7.00  | 10.00  | 14.00  | 20.00  | 27.00   |
| 0.10 | 3.016 | 0.2591350 | 0.0188482 | 0.80 | 0.60 | 5.835   | 2.141   | 3.00  | 4.00   | 5.00   | 7.00   | 9.00   | 3.203 | 6.077   | 2.183   | 4.00  | 5.00   | 6.00   | 7.00   | 9.00    |
| 0.10 | 3.016 | 0.2591350 | 0.0188482 | 0.70 | 0.60 | 3.363   | 0.973   | 2.00  | 3.00   | 3.00   | 4.00   | 5.00   | 3.203 | 3.493   | 1.002   | 2.00  | 3.00   | 3.00   | 4.00   | 5.00    |
| 0.10 | 3.016 | 0.2591350 | 0.0188482 | 0.60 | 0.60 | 2.322   | 0.574   | 2.00  | 2.00   | 2.00   | 3.00   | 3.00   | 3.203 | 2.384   | 0.584   | 2.00  | 2.00   | 2.00   | 3.00   | 3.00    |
| 0.10 | 3.016 | 0.2591350 | 0.0188482 | 0.50 | 0.60 | 1.778   | 0.467   | 1.00  | 2.00   | 2.00   | 2.00   | 2.00   | 3.203 | 1.836   | 0.439   | 1.00  | 2.00   | 2.00   | 2.00   | 2.00    |
| 0.10 | 3.016 | 0.2591350 | 0.0188482 | 1.10 | 0.50 | 14.695  | 6.833   | 8.00  | 10.00  | 13.00  | 18.00  | 24.00  | 3.203 | 15.903  | 7.457   | 8.00  | 11.00  | 14.00  | 19.00  | 26.00   |
| 0.10 | 3.016 | 0.2591350 | 0.0188482 | 1.20 | 0.50 | 8.313   | 2.761   | 5.00  | 6.00   | 8.00   | 10.00  | 12.00  | 3.203 | 8.823   | 2.920   | 6.00  | 7.00   | 8.00   | 10.00  | 13.00   |
| 0.10 | 3.016 | 0.2591350 | 0.0188482 | 1.30 | 0.50 | 5.634   | 1.520   | 4.00  | 5.00   | 5.00   | 6.00   | 8.00   | 3.203 | 5.865   | 1.550   | 4.00  | 5.00   | 6.00   | 7.00   | 8.00    |
| 0.10 | 3.016 | 0.2591350 | 0.0188482 | 1.40 | 0.50 | 4.329   | 0.957   | 3.00  | 4.00   | 4.00   | 5.00   | 6.00   | 3.203 | 4.518   | 1.003   | 3.00  | 4.00   | 4.00   | 5.00   | 6.00    |
| 0.10 | 3.016 | 0.2591350 | 0.0188482 | 0.90 | 0.50 | 12.668  | 5.885   | 6.00  | 8.00   | 11.00  | 16.00  | 20.00  | 3.203 | 13.705  | 6.462   | 7.00  | 9.00   | 12.00  | 17.00  | 22.00   |
| 0.10 | 3.016 | 0.2591350 | 0.0188482 | 0.80 | 0.50 | 5.808   | 2.069   | 3.00  | 4.00   | 6.00   | 7.00   | 9.00   | 3.203 | 6.053   | 2.137   | 4.00  | 5.00   | 6.00   | 7.00   | 9.00    |
| 0.10 | 3.016 | 0.2591350 | 0.0188482 | 0.70 | 0.50 | 3.359   | 0.982   | 2.00  | 3.00   | 3.00   | 4.00   | 5.00   | 3.203 | 3.487   | 1.003   | 2.00  | 3.00   | 3.00   | 4.00   | 5.00    |
| 0.10 | 3.016 | 0.2591350 | 0.0188482 | 0.60 | 0.50 | 2.311   | 0.566   | 2.00  | 2.00   | 2.00   | 3.00   | 3.00   | 3.203 | 2.384   | 0.586   | 2.00  | 2.00   | 2.00   | 3.00   | 3.00    |
| 0.10 | 3.016 | 0.2591350 | 0.0188482 | 0.50 | 0.50 | 1.777   | 0.466   | 1.00  | 2.00   | 2.00   | 2.00   | 2.00   | 3.203 | 1.833   | 0.448   | 1.00  | 2.00   | 2.00   | 2.00   | 2.00    |
| 0.15 | 3.194 | 0.3222067 | 0.0286625 | 1.00 | 1.00 | 370.240 | 360.482 | 43.00 | 110.00 | 261.50 | 512.00 | 841.00 | 3.375 | 500.340 | 488.797 | 56.90 | 146.00 | 345.00 | 688.00 | 1135.10 |
| 0.15 | 3.194 | 0.3222067 | 0.0286625 | 1.10 | 1.10 | 27.799  | 20.123  | 9.00  | 14.00  | 22.00  | 36.00  | 54.00  | 3.375 | 31.406  | 23.301  | 10.00 | 15.00  | 25.00  | 41.00  | 62.00   |
| 0.15 | 3.194 | 0.3222067 | 0.0286625 | 1.20 | 1.10 | 8.554   | 3.708   | 5.00  | 6.00   | 8.00   | 10.00  | 13.00  | 3.375 | 9.084   | 3.959   | 5.00  | 6.     |        |        |         |

|      |       |           |           |      |      |        |        |      |       |       |       |       |       |        |        |       |       |       |       |       |
|------|-------|-----------|-----------|------|------|--------|--------|------|-------|-------|-------|-------|-------|--------|--------|-------|-------|-------|-------|-------|
| 0.15 | 3.194 | 0.3222067 | 0.0286625 | 0.70 | 1.10 | 3.024  | 0.951  | 2.00 | 2.00  | 3.00  | 4.00  | 4.00  | 3.375 | 3.140  | 1.003  | 2.00  | 2.00  | 3.00  | 4.00  | 4.00  |
| 0.15 | 3.194 | 0.3222067 | 0.0286625 | 0.60 | 1.10 | 2.078  | 0.554  | 1.00 | 2.00  | 2.00  | 2.00  | 3.00  | 3.375 | 2.141  | 0.573  | 2.00  | 2.00  | 2.00  | 2.00  | 3.00  |
| 0.15 | 3.194 | 0.3222067 | 0.0286625 | 0.50 | 1.10 | 1.536  | 0.511  | 1.00 | 1.00  | 2.00  | 2.00  | 2.00  | 3.375 | 1.593  | 0.512  | 1.00  | 1.00  | 2.00  | 2.00  | 2.00  |
| 0.15 | 3.194 | 0.3222067 | 0.0286625 | 1.10 | 1.20 | 27.652 | 20.409 | 9.00 | 13.00 | 22.00 | 36.00 | 54.00 | 3.375 | 31.673 | 24.047 | 10.00 | 15.00 | 25.00 | 41.00 | 63.00 |
| 0.15 | 3.194 | 0.3222067 | 0.0286625 | 1.20 | 1.20 | 8.561  | 3.681  | 5.00 | 6.00  | 8.00  | 10.00 | 13.00 | 3.375 | 9.051  | 3.971  | 5.00  | 6.00  | 8.00  | 11.00 | 14.00 |
| 0.15 | 3.194 | 0.3222067 | 0.0286625 | 1.30 | 1.20 | 5.224  | 1.643  | 3.00 | 4.00  | 5.00  | 6.00  | 7.00  | 3.375 | 5.444  | 1.724  | 4.00  | 4.00  | 5.00  | 6.00  | 8.00  |
| 0.15 | 3.194 | 0.3222067 | 0.0286625 | 1.40 | 1.20 | 3.942  | 0.994  | 3.00 | 3.00  | 4.00  | 4.00  | 5.00  | 3.375 | 4.098  | 1.020  | 3.00  | 3.00  | 4.00  | 5.00  | 5.00  |
| 0.15 | 3.194 | 0.3222067 | 0.0286625 | 0.90 | 1.20 | 17.915 | 12.257 | 6.00 | 9.00  | 15.00 | 23.00 | 34.00 | 3.375 | 19.504 | 13.475 | 7.00  | 10.00 | 16.00 | 25.00 | 37.00 |
| 0.15 | 3.194 | 0.3222067 | 0.0286625 | 0.80 | 1.20 | 5.447  | 2.306  | 3.00 | 4.00  | 5.00  | 7.00  | 9.00  | 3.375 | 5.740  | 2.415  | 3.00  | 4.00  | 5.00  | 7.00  | 9.00  |
| 0.15 | 3.194 | 0.3222067 | 0.0286625 | 0.70 | 1.20 | 3.032  | 0.986  | 2.00 | 2.00  | 3.00  | 4.00  | 4.00  | 3.375 | 3.139  | 0.999  | 2.00  | 2.00  | 3.00  | 4.00  | 4.00  |
| 0.15 | 3.194 | 0.3222067 | 0.0286625 | 0.60 | 1.20 | 2.087  | 0.557  | 1.00 | 2.00  | 2.00  | 2.00  | 3.00  | 3.375 | 2.148  | 0.567  | 2.00  | 2.00  | 2.00  | 2.00  | 3.00  |
| 0.15 | 3.194 | 0.3222067 | 0.0286625 | 0.50 | 1.20 | 1.532  | 0.513  | 1.00 | 1.00  | 2.00  | 2.00  | 2.00  | 3.375 | 1.582  | 0.511  | 1.00  | 1.00  | 2.00  | 2.00  | 2.00  |
| 0.15 | 3.194 | 0.3222067 | 0.0286625 | 1.10 | 1.30 | 27.912 | 20.390 | 9.00 | 14.00 | 22.00 | 36.00 | 55.00 | 3.375 | 30.973 | 23.178 | 10.00 | 15.00 | 24.00 | 40.00 | 61.00 |
| 0.15 | 3.194 | 0.3222067 | 0.0286625 | 1.20 | 1.30 | 8.488  | 3.645  | 5.00 | 6.00  | 8.00  | 10.00 | 13.00 | 3.375 | 9.090  | 3.970  | 5.00  | 6.00  | 8.00  | 11.00 | 14.00 |
| 0.15 | 3.194 | 0.3222067 | 0.0286625 | 1.30 | 1.30 | 5.228  | 1.622  | 3.00 | 4.00  | 5.00  | 6.00  | 7.00  | 3.375 | 5.461  | 1.666  | 4.00  | 4.00  | 5.00  | 6.00  | 8.00  |
| 0.15 | 3.194 | 0.3222067 | 0.0286625 | 1.40 | 1.30 | 3.951  | 1.006  | 3.00 | 3.00  | 4.00  | 4.00  | 5.00  | 3.375 | 4.103  | 1.041  | 3.00  | 3.00  | 4.00  | 5.00  | 5.00  |
| 0.15 | 3.194 | 0.3222067 | 0.0286625 | 0.90 | 1.30 | 18.013 | 12.294 | 6.00 | 9.00  | 15.00 | 23.00 | 34.00 | 3.375 | 19.684 | 13.822 | 7.00  | 10.00 | 16.00 | 25.00 | 37.00 |
| 0.15 | 3.194 | 0.3222067 | 0.0286625 | 0.80 | 1.30 | 5.448  | 2.304  | 3.00 | 4.00  | 5.00  | 7.00  | 8.00  | 3.375 | 5.659  | 2.370  | 3.00  | 4.00  | 5.00  | 7.00  | 9.00  |
| 0.15 | 3.194 | 0.3222067 | 0.0286625 | 0.70 | 1.30 | 3.034  | 0.982  | 2.00 | 2.00  | 3.00  | 4.00  | 4.00  | 3.375 | 3.133  | 1.002  | 2.00  | 2.00  | 3.00  | 4.00  | 4.00  |
| 0.15 | 3.194 | 0.3222067 | 0.0286625 | 0.60 | 1.30 | 2.086  | 0.553  | 1.00 | 2.00  | 2.00  | 2.00  | 3.00  | 3.375 | 2.143  | 0.570  | 2.00  | 2.00  | 2.00  | 2.00  | 3.00  |
| 0.15 | 3.194 | 0.3222067 | 0.0286625 | 0.50 | 1.30 | 1.528  | 0.513  | 1.00 | 1.00  | 2.00  | 2.00  | 2.00  | 3.375 | 1.591  | 0.510  | 1.00  | 1.00  | 2.00  | 2.00  | 2.00  |
| 0.15 | 3.194 | 0.3222067 | 0.0286625 | 1.10 | 1.40 | 27.684 | 20.299 | 9.00 | 14.00 | 22.00 | 36.00 | 54.00 | 3.375 | 31.292 | 23.696 | 10.00 | 15.00 | 24.00 | 41.00 | 62.00 |
| 0.15 | 3.194 | 0.3222067 | 0.0286625 | 1.20 | 1.40 | 8.551  | 3.768  | 5.00 | 6.00  | 8.00  | 10.00 | 14.00 | 3.375 | 9.100  | 3.980  | 5.00  | 6.00  | 8.00  | 11.00 | 14.00 |
| 0.15 | 3.194 | 0.3222067 | 0.0286625 | 1.30 | 1.40 | 5.247  | 1.647  | 3.00 | 4.00  | 5.00  | 6.00  | 7.00  | 3.375 | 5.487  | 1.716  | 4.00  | 4.00  | 5.00  | 6.00  | 8.00  |
| 0.15 | 3.194 | 0.3222067 | 0.0286625 | 1.40 | 1.40 | 3.951  | 1.004  | 3.00 | 3.00  | 4.00  | 4.00  | 5.00  | 3.375 | 4.105  | 1.022  | 3.00  | 3.00  | 4.00  | 5.00  | 5.00  |
| 0.15 | 3.194 | 0.3222067 | 0.0286625 | 0.90 | 1.40 | 17.939 | 12.148 | 6.00 | 9.00  | 15.00 | 23.00 | 34.00 | 3.375 | 19.552 | 13.517 | 7.00  | 10.00 | 16.00 | 25.00 | 37.00 |
| 0.15 | 3.194 | 0.3222067 | 0.0286625 | 0.80 | 1.40 | 5.437  | 2.280  | 3.00 | 4.00  | 5.00  | 7.00  | 9.00  | 3.375 | 5.669  | 2.390  | 3.00  | 4.00  | 5.00  | 7.00  | 9.00  |
| 0.15 | 3.194 | 0.3222067 | 0.0286625 | 0.70 | 1.40 | 3.025  | 0.969  | 2.00 | 2.00  | 3.00  | 4.00  | 4.00  | 3.375 | 3.147  | 1.007  | 2.00  | 2.00  | 3.00  | 4.00  | 4.00  |
| 0.15 | 3.194 | 0.3222067 | 0.0286625 | 0.60 | 1.40 | 2.087  | 0.564  | 1.00 | 2.00  | 2.00  | 2.00  | 3.00  | 3.375 | 2.146  | 0.576  | 2.00  | 2.00  | 2.00  | 2.00  | 3.00  |
| 0.15 | 3.194 | 0.3222067 | 0.0286625 | 0.50 | 1.40 | 1.527  | 0.513  | 1.00 | 1.00  | 2.00  | 2.00  | 2.00  | 3.375 | 1.587  | 0.511  | 1.00  | 1.00  | 2.00  | 2.00  | 2.00  |
| 0.15 | 3.194 | 0.3222067 | 0.0286625 | 1.10 | 0.90 | 26.755 | 19.474 | 9.00 | 13.00 | 21.00 | 35.00 | 52.00 | 3.375 | 30.258 | 22.271 | 9.00  | 15.00 | 24.00 | 39.00 | 59.00 |
| 0.15 | 3.194 | 0.3222067 | 0.0286625 | 1.20 | 0.90 | 8.560  | 3.694  | 5.00 | 6.00  | 8.00  | 10.00 | 13.00 | 3.375 | 9.006  | 3.931  | 5.00  | 6.00  | 8.00  | 11.00 | 14.00 |
| 0.15 | 3.194 | 0.3222067 | 0.0286625 | 1.30 | 0.90 | 5.241  | 1.639  | 3.00 | 4.00  | 5.00  | 6.00  | 7.00  | 3.375 | 5.442  | 1.708  | 4.00  | 4.00  | 5.00  | 6.00  | 8.00  |
| 0.15 | 3.194 | 0.3222067 | 0.0286625 | 1.40 | 0.90 | 3.963  | 0.993  | 3.00 | 3.00  | 4.00  | 4.00  | 5.00  | 3.375 | 4.096  | 1.024  | 3.00  | 3.00  | 4.00  | 5.00  | 5.00  |
| 0.15 | 3.194 | 0.3222067 | 0.0286625 | 0.90 | 0.90 | 17.649 | 11.973 | 6.00 | 9.00  | 14.00 | 23.00 | 34.00 | 3.375 | 19.121 | 13.096 | 7.00  | 10.00 | 16.00 | 24.00 | 36.00 |
| 0.15 | 3.194 | 0.3222067 | 0.0286625 | 0.80 | 0.90 | 5.435  | 2.286  | 3.00 | 4.00  | 5.00  | 7.00  | 8.00  | 3.375 | 5.670  | 2.350  | 3.00  | 4.00  | 5.00  | 7.00  | 9.00  |
| 0.15 | 3.194 | 0.3222067 | 0.0286625 | 0.70 | 0.90 | 3.026  | 0.965  | 2.00 | 2.00  | 3.00  | 4.00  | 4.00  | 3.375 | 3.133  | 1.003  | 2.00  | 2.00  | 3.00  | 4.00  | 4.00  |
| 0.15 | 3.194 | 0.3222067 | 0.0286625 | 0.60 | 0.90 | 2.095  | 0.561  | 1.00 | 2.00  | 2.00  | 2.00  | 3.00  | 3.375 | 2.134  | 0.559  | 2.00  | 2.00  | 2.00  | 2.00  | 3.00  |
| 0.15 | 3.194 | 0.3222067 | 0.0286625 | 0.50 | 0.90 | 1.531  | 0.514  | 1.00 | 1.00  | 2.00  | 2.00  | 2.00  | 3.375 | 1.581  | 0.514  | 1.00  | 1.00  | 2.00  | 2.00  | 2.00  |
| 0.15 | 3.194 | 0.3222067 | 0.0286625 | 1.10 | 0.80 | 25.628 | 18.361 | 9.00 | 13.00 | 20.00 | 33.00 | 49.00 | 3.375 | 29.191 | 21.602 | 9.00  | 14.00 | 23.00 | 38.00 | 57.00 |
| 0.15 | 3.194 | 0.3222067 | 0.0286625 | 1.20 | 0.80 | 8.514  | 3.697  | 5.00 | 6.00  | 8.00  | 10.00 | 13.00 | 3.375 | 9.028  | 3.910  | 5.00  | 6.00  | 8.00  | 11.00 | 14.00 |
| 0.15 | 3.194 | 0.3222067 | 0.0286625 | 1.30 | 0.80 | 5.256  | 1.644  | 3.00 | 4.00  | 5.00  | 6.00  | 7.00  | 3.375 | 5.490  | 1.711  | 4.00  | 4.00  | 5.00  | 6.00  | 8.00  |
| 0.15 | 3.194 | 0.3222067 | 0.0286625 | 1.40 | 0.80 | 3.935  | 0.982  | 3.00 | 3.00  | 4.00  | 4.00  | 5.00  | 3.375 | 4.109  | 1.038  | 3.00  | 3.00  | 4.00  | 5.00  | 5.00  |
| 0.15 | 3.194 | 0.3222067 | 0.0286625 | 0.90 | 0.80 | 17.043 | 11.379 | 6.00 | 9.00  | 14.00 | 22.00 | 32.00 | 3.375 | 18.855 | 12.948 | 7.00  | 10.00 | 15.00 | 24.00 | 36.00 |
| 0.15 | 3.194 | 0.3222067 | 0.0286625 | 0.80 | 0.80 | 5.387  | 2.248  | 3.00 | 4.00  | 5.00  | 7.00  | 8.00  | 3.375 | 5.691  | 2.393  | 3.00  | 4.00  | 5.00  | 7.00  | 9.00  |
| 0.15 | 3.194 | 0.3222067 | 0.0286625 | 0.70 | 0.80 | 3.018  | 0.989  | 2.00 | 2.00  | 3.00  | 4.00  | 4.00  | 3.375 | 3.124  | 0.992  | 2.00  | 2.00  | 3.00  | 4.00  | 4.00  |
| 0.15 | 3.194 | 0.3222067 | 0.0286625 | 0.60 | 0.80 | 2.092  | 0.561  | 1.00 | 2.00  | 2.00  | 2.00  | 3.00  | 3.375 | 2.146  | 0.575  | 2.00  | 2.00  | 2.00  | 2.00  | 3.00  |
| 0.15 | 3.194 | 0.3222067 | 0.0286625 | 0.50 | 0.80 | 1.522  | 0.511  | 1.00 | 1.00  | 2.00  | 2.00  | 2.00  | 3.375 | 1.583  | 0.510  | 1.00  | 1.00  | 2.00  | 2.00  | 2.00  |
| 0.15 | 3.194 | 0.3222067 | 0.0286625 | 1.10 | 0.70 | 23.779 | 16.771 | 8.00 | 12.00 | 19.00 | 30.00 | 45.00 | 3.375 | 26.523 | 18.946 | 9.00  | 13.00 | 21.00 | 34.00 | 51.00 |
| 0.15 | 3.194 | 0.3222067 | 0.0286625 | 1.20 | 0.70 | 8.430  | 3.582  | 5.00 | 6.00  | 8.00  | 10.00 | 13.00 | 3.375 | 8.970  | 3.881  | 5.00  | 6.00  | 8.00  | 11.00 | 14.00 |
| 0.15 | 3.194 | 0.3222067 | 0.0286625 | 1.30 | 0.70 | 5.204  | 1.595  | 3.00 | 4.00  | 5.00  | 6.00  | 7.00  | 3.375 | 5.496  | 1.725  | 4.00  | 4.00  | 5.00  | 6.00  | 8.00  |
| 0.15 | 3.194 | 0.3222067 | 0.0286625 | 1.40 | 0.70 | 3.925  | 0.984  | 3.00 | 3.00  | 4.00  | 4.00  | 5.00  | 3.375 | 4.120  | 1.030  | 3.00  | 3.00  | 4.00  | 5.00  | 5.00  |
| 0.15 | 3.194 | 0.3222067 | 0.0286625 | 0.90 | 0.70 | 16.416 | 10.648 | 6.00 | 9.00  | 14.00 | 21.00 | 30.00 | 3.375 | 18.016 | 11.983 | 7.00  | 10.00 | 15.00 | 23.00 | 34.00 |
| 0.15 | 3.194 | 0.3222067 | 0.0286625 | 0.80 | 0.70 | 5.392  | 2.264  | 3.00 | 4.00  | 5.00  | 7.00  | 8.00  | 3.375 | 5.658  | 2.365  | 3.00  | 4.00  | 5.00  | 7.00  | 9.00  |
| 0.15 | 3.194 | 0.3222067 | 0.0286625 | 0.70 | 0.70 | 3.028  | 0.963  | 2.00 | 2.00  | 3.00  | 4.00  | 4.00  | 3.375 | 3.121  | 1.000  | 2.00  | 2.00  | 3.00  | 4.00  | 4.00  |
| 0.15 | 3.194 | 0.3222067 | 0.0286625 | 0.60 | 0.70 | 2.092  | 0.570  | 1.00 | 2.00  | 2.00  | 2.00  | 3.00  | 3.375 | 2.135  | 0.554  | 2.00  | 2.00  | 2.00  | 2.00  | 3.00  |
| 0.15 | 3.194 | 0.3222067 | 0.0286625 | 0.50 | 0.70 | 1.531  | 0.511  | 1.00 | 1.00  | 2.00  | 2.00  | 2.00  | 3.375 | 1.588  | 0.511  | 1.00  | 1.00  | 2.00  | 2.00  | 2.00  |
| 0.15 | 3.194 | 0.3222067 | 0.0286625 | 1.10 | 0.60 | 20.184 | 13.072 | 8.00 | 11.00 | 17.00 | 25.00 | 37.00 | 3.375 | 22.698 | 15.071 | 8.00  | 12.00 | 19.00 | 29.00 |       |

|      |       |           |           |      |      |        |       |      |      |       |       |       |       |        |        |      |       |       |       |       |
|------|-------|-----------|-----------|------|------|--------|-------|------|------|-------|-------|-------|-------|--------|--------|------|-------|-------|-------|-------|
| 0.15 | 3.194 | 0.3222067 | 0.0286625 | 0.80 | 0.60 | 5.388  | 2.198 | 3.00 | 4.00 | 5.00  | 7.00  | 8.00  | 3.375 | 5.639  | 2.341  | 3.00 | 4.00  | 5.00  | 7.00  | 9.00  |
| 0.15 | 3.194 | 0.3222067 | 0.0286625 | 0.70 | 0.60 | 3.020  | 0.968 | 2.00 | 2.00 | 3.00  | 4.00  | 4.00  | 3.375 | 3.146  | 1.001  | 2.00 | 2.00  | 3.00  | 4.00  | 4.00  |
| 0.15 | 3.194 | 0.3222067 | 0.0286625 | 0.60 | 0.60 | 2.088  | 0.558 | 1.00 | 2.00 | 2.00  | 2.00  | 3.00  | 3.375 | 2.137  | 0.551  | 2.00 | 2.00  | 2.00  | 2.00  | 3.00  |
| 0.15 | 3.194 | 0.3222067 | 0.0286625 | 0.50 | 0.60 | 1.531  | 0.514 | 1.00 | 1.00 | 2.00  | 2.00  | 2.00  | 3.375 | 1.588  | 0.513  | 1.00 | 1.00  | 2.00  | 2.00  | 2.00  |
| 0.15 | 3.194 | 0.3222067 | 0.0286625 | 1.10 | 0.50 | 15.563 | 9.034 | 7.00 | 9.00 | 13.00 | 19.00 | 27.00 | 3.375 | 17.441 | 10.288 | 7.00 | 10.00 | 15.00 | 22.00 | 31.00 |
| 0.15 | 3.194 | 0.3222067 | 0.0286625 | 1.20 | 0.50 | 8.064  | 3.242 | 5.00 | 6.00 | 7.00  | 10.00 | 12.00 | 3.375 | 8.570  | 3.477  | 5.00 | 6.00  | 8.00  | 10.00 | 13.00 |
| 0.15 | 3.194 | 0.3222067 | 0.0286625 | 1.30 | 0.50 | 5.170  | 1.584 | 3.00 | 4.00 | 5.00  | 6.00  | 7.00  | 3.375 | 5.421  | 1.657  | 4.00 | 4.00  | 5.00  | 6.00  | 8.00  |
| 0.15 | 3.194 | 0.3222067 | 0.0286625 | 1.40 | 0.50 | 3.940  | 1.001 | 3.00 | 3.00 | 4.00  | 4.00  | 5.00  | 3.375 | 4.095  | 1.021  | 3.00 | 3.00  | 4.00  | 5.00  | 5.00  |
| 0.15 | 3.194 | 0.3222067 | 0.0286625 | 0.90 | 0.50 | 12.835 | 7.191 | 6.00 | 8.00 | 11.00 | 16.00 | 22.00 | 3.375 | 14.202 | 8.019  | 6.00 | 8.00  | 12.00 | 18.00 | 25.00 |
| 0.15 | 3.194 | 0.3222067 | 0.0286625 | 0.80 | 0.50 | 5.327  | 2.135 | 3.00 | 4.00 | 5.00  | 6.00  | 8.00  | 3.375 | 5.582  | 2.257  | 3.00 | 4.00  | 5.00  | 7.00  | 8.00  |
| 0.15 | 3.194 | 0.3222067 | 0.0286625 | 0.70 | 0.50 | 3.022  | 0.957 | 2.00 | 2.00 | 3.00  | 4.00  | 4.00  | 3.375 | 3.136  | 1.014  | 2.00 | 2.00  | 3.00  | 4.00  | 4.00  |
| 0.15 | 3.194 | 0.3222067 | 0.0286625 | 0.60 | 0.50 | 2.092  | 0.553 | 1.00 | 2.00 | 2.00  | 2.00  | 3.00  | 3.375 | 2.144  | 0.564  | 2.00 | 2.00  | 2.00  | 2.00  | 3.00  |
| 0.15 | 3.194 | 0.3222067 | 0.0286625 | 0.50 | 0.50 | 1.536  | 0.513 | 1.00 | 1.00 | 2.00  | 2.00  | 2.00  | 3.375 | 1.579  | 0.510  | 1.00 | 1.00  | 2.00  | 2.00  | 2.00  |

$ARL_0 = 370$

$ARL_0 = 500$

Case 2  
 $\phi=148$

|      |       |           |           |      |      |         |         |       |        |        |        |        |       |         |         |       |        |        |        |         |
|------|-------|-----------|-----------|------|------|---------|---------|-------|--------|--------|--------|--------|-------|---------|---------|-------|--------|--------|--------|---------|
| 0.05 | 2.701 | 0.1807278 | 0.0092167 | 1.00 | 1.00 | 370.234 | 354.010 | 54.00 | 120.00 | 265.00 | 508.00 | 838.10 | 2.897 | 500.684 | 482.925 | 65.00 | 156.00 | 355.00 | 685.25 | 1136.00 |
| 0.05 | 2.701 | 0.1807278 | 0.0092167 | 1.10 | 1.10 | 37.084  | 21.878  | 16.00 | 22.00  | 31.00  | 46.00  | 65.00  | 2.897 | 40.881  | 24.373  | 17.00 | 24.00  | 35.00  | 52.00  | 73.00   |
| 0.05 | 2.701 | 0.1807278 | 0.0092167 | 1.20 | 1.10 | 15.138  | 5.623   | 9.00  | 11.00  | 14.00  | 18.00  | 22.00  | 2.897 | 16.015  | 5.860   | 10.00 | 12.00  | 15.00  | 19.00  | 24.00   |
| 0.05 | 2.701 | 0.1807278 | 0.0092167 | 1.30 | 1.10 | 9.860   | 2.742   | 7.00  | 8.00   | 9.00   | 11.00  | 13.00  | 2.897 | 10.325  | 2.797   | 7.00  | 8.00   | 10.00  | 12.00  | 14.00   |
| 0.05 | 2.701 | 0.1807278 | 0.0092167 | 1.40 | 1.10 | 7.555   | 1.719   | 6.00  | 6.00   | 7.00   | 9.00   | 10.00  | 2.897 | 7.884   | 1.763   | 6.00  | 7.00   | 8.00   | 9.00   | 10.00   |
| 0.05 | 2.701 | 0.1807278 | 0.0092167 | 0.90 | 1.10 | 27.945  | 16.365  | 12.00 | 16.00  | 24.00  | 35.00  | 49.00  | 2.897 | 29.931  | 17.378  | 13.00 | 18.00  | 26.00  | 38.00  | 53.00   |
| 0.05 | 2.701 | 0.1807278 | 0.0092167 | 0.80 | 1.10 | 10.171  | 3.869   | 6.00  | 7.00   | 10.00  | 12.00  | 15.00  | 2.897 | 10.634  | 4.027   | 6.00  | 8.00   | 10.00  | 13.00  | 16.00   |
| 0.05 | 2.701 | 0.1807278 | 0.0092167 | 0.70 | 1.10 | 5.787   | 1.738   | 4.00  | 5.00   | 6.00   | 7.00   | 8.00   | 2.897 | 6.043   | 1.801   | 4.00  | 5.00   | 6.00   | 7.00   | 8.00    |
| 0.05 | 2.701 | 0.1807278 | 0.0092167 | 0.60 | 1.10 | 3.884   | 1.037   | 3.00  | 3.00   | 4.00   | 4.00   | 5.00   | 2.897 | 4.028   | 1.035   | 3.00  | 3.00   | 4.00   | 5.00   | 5.00    |
| 0.05 | 2.701 | 0.1807278 | 0.0092167 | 0.50 | 1.10 | 2.800   | 0.678   | 2.00  | 2.00   | 3.00   | 3.00   | 4.00   | 2.897 | 2.907   | 0.692   | 2.00  | 2.00   | 3.00   | 3.00   | 4.00    |
| 0.05 | 2.701 | 0.1807278 | 0.0092167 | 1.10 | 1.20 | 36.429  | 21.180  | 16.00 | 21.00  | 31.00  | 46.00  | 65.00  | 2.897 | 40.000  | 23.413  | 17.00 | 23.00  | 34.00  | 50.00  | 70.00   |
| 0.05 | 2.701 | 0.1807278 | 0.0092167 | 1.20 | 1.20 | 14.972  | 5.522   | 9.00  | 11.00  | 14.00  | 18.00  | 22.00  | 2.897 | 15.800  | 5.718   | 10.00 | 12.00  | 15.00  | 19.00  | 23.00   |
| 0.05 | 2.701 | 0.1807278 | 0.0092167 | 1.30 | 1.20 | 9.863   | 2.791   | 7.00  | 8.00   | 9.00   | 11.00  | 13.00  | 2.897 | 10.321  | 2.812   | 7.00  | 8.00   | 10.00  | 12.00  | 14.00   |
| 0.05 | 2.701 | 0.1807278 | 0.0092167 | 1.40 | 1.20 | 7.539   | 1.707   | 6.00  | 6.00   | 7.00   | 9.00   | 10.00  | 2.897 | 7.915   | 1.787   | 6.00  | 7.00   | 8.00   | 9.00   | 10.00   |
| 0.05 | 2.701 | 0.1807278 | 0.0092167 | 0.90 | 1.20 | 27.957  | 15.951  | 12.00 | 17.00  | 24.00  | 35.00  | 49.00  | 2.897 | 30.237  | 17.498  | 13.00 | 18.00  | 26.00  | 38.00  | 53.00   |
| 0.05 | 2.701 | 0.1807278 | 0.0092167 | 0.80 | 1.20 | 10.188  | 3.851   | 6.00  | 7.00   | 10.00  | 12.00  | 15.00  | 2.897 | 10.620  | 4.017   | 6.00  | 8.00   | 10.00  | 13.00  | 16.00   |
| 0.05 | 2.701 | 0.1807278 | 0.0092167 | 0.70 | 1.20 | 5.790   | 1.745   | 4.00  | 5.00   | 6.00   | 7.00   | 8.00   | 2.897 | 6.022   | 1.779   | 4.00  | 5.00   | 6.00   | 7.00   | 8.00    |
| 0.05 | 2.701 | 0.1807278 | 0.0092167 | 0.60 | 1.20 | 3.872   | 1.008   | 3.00  | 3.00   | 4.00   | 4.00   | 5.00   | 2.897 | 4.005   | 1.035   | 3.00  | 3.00   | 4.00   | 5.00   | 5.00    |
| 0.05 | 2.701 | 0.1807278 | 0.0092167 | 0.50 | 1.20 | 2.797   | 0.679   | 2.00  | 2.00   | 3.00   | 3.00   | 4.00   | 2.897 | 2.900   | 0.689   | 2.00  | 2.00   | 3.00   | 3.00   | 4.00    |
| 0.05 | 2.701 | 0.1807278 | 0.0092167 | 1.10 | 1.30 | 35.635  | 19.952  | 16.00 | 22.00  | 31.00  | 44.00  | 62.00  | 2.897 | 39.569  | 22.890  | 17.00 | 23.00  | 34.00  | 50.00  | 69.10   |
| 0.05 | 2.701 | 0.1807278 | 0.0092167 | 1.20 | 1.30 | 14.953  | 5.468   | 9.00  | 11.00  | 14.00  | 18.00  | 22.00  | 2.897 | 15.857  | 5.719   | 10.00 | 12.00  | 15.00  | 19.00  | 24.00   |
| 0.05 | 2.701 | 0.1807278 | 0.0092167 | 1.30 | 1.30 | 9.826   | 2.721   | 7.00  | 8.00   | 9.00   | 11.00  | 13.00  | 2.897 | 10.290  | 2.857   | 7.00  | 8.00   | 10.00  | 12.00  | 14.00   |
| 0.05 | 2.701 | 0.1807278 | 0.0092167 | 1.40 | 1.30 | 7.537   | 1.703   | 6.00  | 6.00   | 7.00   | 9.00   | 10.00  | 2.897 | 7.885   | 1.786   | 6.00  | 7.00   | 8.00   | 9.00   | 10.00   |
| 0.05 | 2.701 | 0.1807278 | 0.0092167 | 0.90 | 1.30 | 27.360  | 15.396  | 12.00 | 17.00  | 24.00  | 34.00  | 47.00  | 2.897 | 29.659  | 16.827  | 13.00 | 18.00  | 26.00  | 37.00  | 51.00   |
| 0.05 | 2.701 | 0.1807278 | 0.0092167 | 0.80 | 1.30 | 10.134  | 3.864   | 6.00  | 7.00   | 9.00   | 12.00  | 15.00  | 2.897 | 10.610  | 3.980   | 6.00  | 8.00   | 10.00  | 13.00  | 16.00   |
| 0.05 | 2.701 | 0.1807278 | 0.0092167 | 0.70 | 1.30 | 5.802   | 1.764   | 4.00  | 5.00   | 6.00   | 7.00   | 8.00   | 2.897 | 6.014   | 1.813   | 4.00  | 5.00   | 6.00   | 7.00   | 8.00    |
| 0.05 | 2.701 | 0.1807278 | 0.0092167 | 0.60 | 1.30 | 3.876   | 1.021   | 3.00  | 3.00   | 4.00   | 4.00   | 5.00   | 2.897 | 4.022   | 1.041   | 3.00  | 3.00   | 4.00   | 5.00   | 5.00    |
| 0.05 | 2.701 | 0.1807278 | 0.0092167 | 0.50 | 1.30 | 2.804   | 0.691   | 2.00  | 2.00   | 3.00   | 3.00   | 4.00   | 2.897 | 2.913   | 0.696   | 2.00  | 2.00   | 3.00   | 3.00   | 4.00    |
| 0.05 | 2.701 | 0.1807278 | 0.0092167 | 1.10 | 1.40 | 34.668  | 18.848  | 16.00 | 21.00  | 30.00  | 43.00  | 59.00  | 2.897 | 38.225  | 21.402  | 17.00 | 23.00  | 33.00  | 47.00  | 66.00   |
| 0.05 | 2.701 | 0.1807278 | 0.0092167 | 1.20 | 1.40 | 15.097  | 5.456   | 9.00  | 11.00  | 14.00  | 18.00  | 22.00  | 2.897 | 15.902  | 5.803   | 10.00 | 12.00  | 15.00  | 19.00  | 23.00   |
| 0.05 | 2.701 | 0.1807278 | 0.0092167 | 1.30 | 1.40 | 9.770   | 2.665   | 7.00  | 8.00   | 9.00   | 11.00  | 13.00  | 2.897 | 10.336  | 2.856   | 7.00  | 8.00   | 10.00  | 12.00  | 14.00   |
| 0.05 | 2.701 | 0.1807278 | 0.0092167 | 1.40 | 1.40 | 7.527   | 1.715   | 6.00  | 6.00   | 7.00   | 9.00   | 10.00  | 2.897 | 7.892   | 1.744   | 6.00  | 7.00   | 8.00   | 9.00   | 10.00   |
| 0.05 | 2.701 | 0.1807278 | 0.0092167 | 0.90 | 1.40 | 26.859  | 14.739  | 12.00 | 16.00  | 23.00  | 34.00  | 46.00  | 2.897 | 29.293  | 16.108  | 13.00 | 18.00  | 26.00  | 37.00  | 50.00   |
| 0.05 | 2.701 | 0.1807278 | 0.0092167 | 0.80 | 1.40 | 10.112  | 3.793   | 6.00  | 7.00   | 10.00  | 12.00  | 15.00  | 2.897 | 10.642  | 3.999   | 6.00  | 8.00   | 10.00  | 13.00  | 16.00   |
| 0.05 | 2.701 | 0.1807278 | 0.0092167 | 0.70 | 1.40 | 5.766   | 1.757   | 4.00  | 4.00   | 6.00   | 7.00   | 8.00   | 2.897 | 5.985   | 1.760   | 4.00  | 5.00   | 6.00   | 7.00   | 8.00    |
| 0.05 | 2.701 | 0.1807278 | 0.0092167 | 0.60 | 1.40 | 3.868   | 1.028   | 3.00  | 3.00   | 4.00   | 4.00   | 5.00   | 2.897 | 4.027   | 1.045   | 3.00  | 3.00   | 4.00   | 5.00   | 5.00    |
| 0.05 | 2.701 | 0.1807278 | 0.0092167 | 0.50 | 1.40 | 2.813   | 0.682   | 2.00  | 2.00   | 3.00   | 3.00   | 4.00   | 2.897 | 2.909   | 0.698   | 2.00  | 2.00   | 3.00   | 3.00   | 4.00    |
| 0.05 | 2.701 | 0.1807278 | 0.0092167 | 1.10 | 0.90 | 35.684  | 20.658  | 15.00 | 21.00  | 31.00  | 45.00  | 62.00  | 2.897 | 39.807  | 23.502  | 17.00 | 23.00  | 34.00  | 50.00  | 71.00   |
| 0.05 | 2.701 | 0.1807278 | 0.0092167 | 1.20 | 0.90 | 15.032  | 5.452   | 9.00  | 11.00  | 14.00  | 18.00  | 22.00  | 2.897 | 15.816  | 5.702   | 10.00 | 12.00  | 15.00  | 19.00  | 23.00   |
| 0.05 | 2.701 | 0.1807278 | 0.0092167 | 1.30 | 0.90 | 9.810   | 2.720   | 7.00  | 8.00   | 9.00   | 11.00  | 13.00  | 2.897 | 10.285  | 2.849   | 7.00  | 8.00   | 10.00  | 12.00  | 14.00   |
| 0.05 | 2.701 | 0.1807278 | 0.0092167 | 1.40 | 0.90 | 7.562   | 1.740   | 6.00  | 6.00   | 7.00   | 9.00   | 10.00  | 2.897 | 7.893   | 1.786   | 6.00  | 7.00   | 8.00   | 9.00   | 10.00   |
| 0.05 | 2.701 | 0.1807278 | 0.0092167 | 0.90 | 0.90 | 27.602  | 15.729  | 12.00 | 16.00  | 24.00  | 35.00  | 49.00  | 2.897 | 29.941  | 17.312  | 13.00 | 18.00  | 26.00  | 38.00  | 53.00   |
| 0.05 | 2.701 | 0.1807278 | 0.0092167 | 0.80 | 0.90 | 10.179  | 3.861   | 6.00  | 7.00   | 10.00  | 12.00  | 15.00  | 2.897 | 10.608  | 3.994   | 6.00  | 8.00   | 10.00  | 13.00  | 16.00   |
| 0.05 | 2.701 | 0.1807278 | 0.0092167 | 0.70 | 0.90 |         |         |       |        |        |        |        |       |         |         |       |        |        |        |         |

|      |       |           |           |      |      |         |         |       |        |        |        |        |       |         |         |       |        |        |        |         |
|------|-------|-----------|-----------|------|------|---------|---------|-------|--------|--------|--------|--------|-------|---------|---------|-------|--------|--------|--------|---------|
| 0.05 | 2.701 | 0.1807278 | 0.0092167 | 1.10 | 0.80 | 33.555  | 18.935  | 15.00 | 20.00  | 29.00  | 42.00  | 58.00  | 2.897 | 37.430  | 21.574  | 16.00 | 22.00  | 32.00  | 47.00  | 66.00   |
| 0.05 | 2.701 | 0.1807278 | 0.0092167 | 1.20 | 0.80 | 15.052  | 5.409   | 9.00  | 11.00  | 14.00  | 18.00  | 22.00  | 2.897 | 15.833  | 5.710   | 10.00 | 12.00  | 15.00  | 19.00  | 23.00   |
| 0.05 | 2.701 | 0.1807278 | 0.0092167 | 1.30 | 0.80 | 9.809   | 2.678   | 7.00  | 8.00   | 9.00   | 11.00  | 13.00  | 2.897 | 10.282  | 2.781   | 7.00  | 8.00   | 10.00  | 12.00  | 14.00   |
| 0.05 | 2.701 | 0.1807278 | 0.0092167 | 1.40 | 0.80 | 7.513   | 1.703   | 6.00  | 6.00   | 7.00   | 8.00   | 10.00  | 2.897 | 7.894   | 1.778   | 6.00  | 7.00   | 8.00   | 9.00   | 10.00   |
| 0.05 | 2.701 | 0.1807278 | 0.0092167 | 0.90 | 0.80 | 26.652  | 15.157  | 11.00 | 16.00  | 23.00  | 33.00  | 46.00  | 2.897 | 28.572  | 16.176  | 12.00 | 17.00  | 25.00  | 36.00  | 50.00   |
| 0.05 | 2.701 | 0.1807278 | 0.0092167 | 0.80 | 0.80 | 10.121  | 3.813   | 6.00  | 7.00   | 9.00   | 12.00  | 15.00  | 2.897 | 10.570  | 3.936   | 6.00  | 8.00   | 10.00  | 13.00  | 16.00   |
| 0.05 | 2.701 | 0.1807278 | 0.0092167 | 0.70 | 0.80 | 5.812   | 1.765   | 4.00  | 5.00   | 6.00   | 7.00   | 8.00   | 2.897 | 6.041   | 1.815   | 4.00  | 5.00   | 6.00   | 7.00   | 8.00    |
| 0.05 | 2.701 | 0.1807278 | 0.0092167 | 0.60 | 0.80 | 3.865   | 1.015   | 3.00  | 3.00   | 4.00   | 4.00   | 5.00   | 2.897 | 4.036   | 1.043   | 3.00  | 3.00   | 4.00   | 5.00   | 5.00    |
| 0.05 | 2.701 | 0.1807278 | 0.0092167 | 0.50 | 0.80 | 2.797   | 0.676   | 2.00  | 2.00   | 3.00   | 3.00   | 4.00   | 2.897 | 2.923   | 0.702   | 2.00  | 2.00   | 3.00   | 3.00   | 4.00    |
| 0.05 | 2.701 | 0.1807278 | 0.0092167 | 1.10 | 0.70 | 29.589  | 15.466  | 14.00 | 18.00  | 26.00  | 37.00  | 50.00  | 2.897 | 32.695  | 17.646  | 15.00 | 20.00  | 29.00  | 41.00  | 56.00   |
| 0.05 | 2.701 | 0.1807278 | 0.0092167 | 1.20 | 0.70 | 14.597  | 5.149   | 9.00  | 11.00  | 14.00  | 17.00  | 21.00  | 2.897 | 15.591  | 5.557   | 10.00 | 12.00  | 15.00  | 18.00  | 23.00   |
| 0.05 | 2.701 | 0.1807278 | 0.0092167 | 1.30 | 0.70 | 9.775   | 2.729   | 7.00  | 8.00   | 9.00   | 11.00  | 13.00  | 2.897 | 10.274  | 2.772   | 7.00  | 8.00   | 10.00  | 12.00  | 14.00   |
| 0.05 | 2.701 | 0.1807278 | 0.0092167 | 1.40 | 0.70 | 7.513   | 1.680   | 6.00  | 6.00   | 7.00   | 8.00   | 10.00  | 2.897 | 7.903   | 1.772   | 6.00  | 7.00   | 8.00   | 9.00   | 10.00   |
| 0.05 | 2.701 | 0.1807278 | 0.0092167 | 0.90 | 0.70 | 24.296  | 12.827  | 11.00 | 15.00  | 22.00  | 30.00  | 41.00  | 2.897 | 26.186  | 13.548  | 12.00 | 16.00  | 23.00  | 33.00  | 44.00   |
| 0.05 | 2.701 | 0.1807278 | 0.0092167 | 0.80 | 0.70 | 10.014  | 3.804   | 6.00  | 7.00   | 9.00   | 12.00  | 15.00  | 2.897 | 10.484  | 3.883   | 6.00  | 8.00   | 10.00  | 13.00  | 16.00   |
| 0.05 | 2.701 | 0.1807278 | 0.0092167 | 0.70 | 0.70 | 5.798   | 1.750   | 4.00  | 5.00   | 6.00   | 7.00   | 8.00   | 2.897 | 6.051   | 1.786   | 4.00  | 5.00   | 6.00   | 7.00   | 8.00    |
| 0.05 | 2.701 | 0.1807278 | 0.0092167 | 0.60 | 0.70 | 3.891   | 1.038   | 3.00  | 3.00   | 4.00   | 4.00   | 5.00   | 2.897 | 4.045   | 1.042   | 3.00  | 3.00   | 4.00   | 5.00   | 5.00    |
| 0.05 | 2.701 | 0.1807278 | 0.0092167 | 0.50 | 0.70 | 2.803   | 0.684   | 2.00  | 2.00   | 3.00   | 3.00   | 4.00   | 2.897 | 2.902   | 0.702   | 2.00  | 2.00   | 3.00   | 3.00   | 4.00    |
| 0.05 | 2.701 | 0.1807278 | 0.0092167 | 1.10 | 0.60 | 23.963  | 11.214  | 12.00 | 16.00  | 22.00  | 29.00  | 39.00  | 2.897 | 25.937  | 12.128  | 13.00 | 17.00  | 23.00  | 32.00  | 42.00   |
| 0.05 | 2.701 | 0.1807278 | 0.0092167 | 1.20 | 0.60 | 14.200  | 4.897   | 9.00  | 11.00  | 13.00  | 17.00  | 21.00  | 2.897 | 15.092  | 5.157   | 9.00  | 11.00  | 14.00  | 18.00  | 22.00   |
| 0.05 | 2.701 | 0.1807278 | 0.0092167 | 1.30 | 0.60 | 9.722   | 2.645   | 7.00  | 8.00   | 9.00   | 11.00  | 13.00  | 2.897 | 10.194  | 2.724   | 7.00  | 8.00   | 10.00  | 12.00  | 14.00   |
| 0.05 | 2.701 | 0.1807278 | 0.0092167 | 1.40 | 0.60 | 7.544   | 1.678   | 6.00  | 6.00   | 7.00   | 9.00   | 10.00  | 2.897 | 7.876   | 1.757   | 6.00  | 7.00   | 8.00   | 9.00   | 10.00   |
| 0.05 | 2.701 | 0.1807278 | 0.0092167 | 0.90 | 0.60 | 20.799  | 9.852   | 10.00 | 14.00  | 19.00  | 26.00  | 34.00  | 2.897 | 22.530  | 10.751  | 11.00 | 15.00  | 20.00  | 28.00  | 37.00   |
| 0.05 | 2.701 | 0.1807278 | 0.0092167 | 0.80 | 0.60 | 9.972   | 3.665   | 6.00  | 7.00   | 9.00   | 12.00  | 15.00  | 2.897 | 10.421  | 3.808   | 6.00  | 8.00   | 10.00  | 12.00  | 15.00   |
| 0.05 | 2.701 | 0.1807278 | 0.0092167 | 0.70 | 0.60 | 5.791   | 1.737   | 4.00  | 5.00   | 6.00   | 7.00   | 8.00   | 2.897 | 6.014   | 1.783   | 4.00  | 5.00   | 6.00   | 7.00   | 8.00    |
| 0.05 | 2.701 | 0.1807278 | 0.0092167 | 0.60 | 0.60 | 3.876   | 1.014   | 3.00  | 3.00   | 4.00   | 4.00   | 5.00   | 2.897 | 4.032   | 1.034   | 3.00  | 3.00   | 4.00   | 5.00   | 5.00    |
| 0.05 | 2.701 | 0.1807278 | 0.0092167 | 0.50 | 0.60 | 2.810   | 0.685   | 2.00  | 2.00   | 3.00   | 3.00   | 4.00   | 2.897 | 2.916   | 0.696   | 2.00  | 2.00   | 3.00   | 3.00   | 4.00    |
| 0.05 | 2.701 | 0.1807278 | 0.0092167 | 1.10 | 0.50 | 17.756  | 7.051   | 10.00 | 13.00  | 16.00  | 21.00  | 27.00  | 2.897 | 19.099  | 7.626   | 11.00 | 14.00  | 18.00  | 23.00  | 29.00   |
| 0.05 | 2.701 | 0.1807278 | 0.0092167 | 1.20 | 0.50 | 13.082  | 4.117   | 9.00  | 10.00  | 12.00  | 15.00  | 19.00  | 2.897 | 13.921  | 4.357   | 9.00  | 11.00  | 13.00  | 16.00  | 20.00   |
| 0.05 | 2.701 | 0.1807278 | 0.0092167 | 1.30 | 0.50 | 9.539   | 2.461   | 7.00  | 8.00   | 9.00   | 11.00  | 13.00  | 2.897 | 10.100  | 2.638   | 7.00  | 8.00   | 10.00  | 12.00  | 14.00   |
| 0.05 | 2.701 | 0.1807278 | 0.0092167 | 1.40 | 0.50 | 7.473   | 1.672   | 6.00  | 6.00   | 7.00   | 8.00   | 10.00  | 2.897 | 7.910   | 1.764   | 6.00  | 7.00   | 8.00   | 9.00   | 10.00   |
| 0.05 | 2.701 | 0.1807278 | 0.0092167 | 0.90 | 0.50 | 16.506  | 6.558   | 9.00  | 12.00  | 15.00  | 20.00  | 25.00  | 2.897 | 17.609  | 6.958   | 10.00 | 13.00  | 16.00  | 21.00  | 27.00   |
| 0.05 | 2.701 | 0.1807278 | 0.0092167 | 0.80 | 0.50 | 9.631   | 3.270   | 6.00  | 7.00   | 9.00   | 11.00  | 14.00  | 2.897 | 10.186  | 3.494   | 6.00  | 8.00   | 10.00  | 12.00  | 15.00   |
| 0.05 | 2.701 | 0.1807278 | 0.0092167 | 0.70 | 0.50 | 5.768   | 1.748   | 4.00  | 5.00   | 6.00   | 7.00   | 8.00   | 2.897 | 5.995   | 1.783   | 4.00  | 5.00   | 6.00   | 7.00   | 8.00    |
| 0.05 | 2.701 | 0.1807278 | 0.0092167 | 0.60 | 0.50 | 3.880   | 1.032   | 3.00  | 3.00   | 4.00   | 4.00   | 5.00   | 2.897 | 4.017   | 1.048   | 3.00  | 3.00   | 4.00   | 5.00   | 5.00    |
| 0.05 | 2.701 | 0.1807278 | 0.0092167 | 0.50 | 0.50 | 2.800   | 0.678   | 2.00  | 2.00   | 3.00   | 3.00   | 4.00   | 2.897 | 2.898   | 0.691   | 2.00  | 2.00   | 3.00   | 3.00   | 4.00    |
| 0.10 | 3.026 | 0.2588440 | 0.0187933 | 1.00 | 1.00 | 370.575 | 360.502 | 44.00 | 111.00 | 266.00 | 514.00 | 848.00 | 3.216 | 500.284 | 486.196 | 63.00 | 154.00 | 352.00 | 688.00 | 1135.10 |
| 0.10 | 3.026 | 0.2588440 | 0.0187933 | 1.10 | 1.10 | 45.770  | 34.613  | 14.00 | 21.00  | 36.00  | 59.00  | 91.00  | 3.216 | 52.799  | 40.970  | 15.00 | 24.00  | 41.00  | 69.00  | 106.00  |
| 0.10 | 3.026 | 0.2588440 | 0.0187933 | 1.20 | 1.10 | 14.435  | 6.973   | 7.00  | 10.00  | 13.00  | 18.00  | 24.00  | 3.216 | 15.513  | 7.461   | 8.00  | 10.00  | 14.00  | 19.00  | 25.00   |
| 0.10 | 3.026 | 0.2588440 | 0.0187933 | 1.30 | 1.10 | 8.684   | 3.037   | 5.00  | 7.00   | 8.00   | 10.00  | 13.00  | 3.216 | 9.125   | 3.136   | 6.00  | 7.00   | 9.00   | 11.00  | 13.00   |
| 0.10 | 3.026 | 0.2588440 | 0.0187933 | 1.40 | 1.10 | 6.461   | 1.817   | 4.00  | 5.00   | 6.00   | 7.00   | 9.00   | 3.216 | 6.748   | 1.854   | 5.00  | 5.00   | 6.00   | 8.00   | 9.00    |
| 0.10 | 3.026 | 0.2588440 | 0.0187933 | 0.90 | 1.10 | 28.909  | 20.871  | 10.00 | 14.00  | 23.00  | 37.00  | 56.00  | 3.216 | 32.877  | 24.126  | 11.00 | 16.00  | 26.00  | 43.00  | 64.00   |
| 0.10 | 3.026 | 0.2588440 | 0.0187933 | 0.80 | 1.10 | 8.877   | 4.179   | 5.00  | 6.00   | 8.00   | 11.00  | 14.00  | 3.216 | 9.391   | 4.338   | 5.00  | 6.00   | 9.00   | 11.00  | 15.00   |
| 0.10 | 3.026 | 0.2588440 | 0.0187933 | 0.70 | 1.10 | 4.876   | 1.741   | 3.00  | 4.00   | 5.00   | 6.00   | 7.00   | 3.216 | 5.045   | 1.791   | 3.00  | 4.00   | 5.00   | 6.00   | 7.00    |
| 0.10 | 3.026 | 0.2588440 | 0.0187933 | 0.60 | 1.10 | 3.180   | 0.961   | 2.00  | 3.00   | 3.00   | 4.00   | 4.00   | 3.216 | 3.285   | 1.000   | 2.00  | 3.00   | 3.00   | 4.00   | 5.00    |
| 0.10 | 3.026 | 0.2588440 | 0.0187933 | 0.50 | 1.10 | 2.304   | 0.614   | 2.00  | 2.00   | 2.00   | 3.00   | 3.00   | 3.216 | 2.368   | 0.616   | 2.00  | 2.00   | 2.00   | 3.00   | 3.00    |
| 0.10 | 3.026 | 0.2588440 | 0.0187933 | 1.10 | 1.20 | 45.211  | 33.740  | 14.00 | 22.00  | 35.00  | 59.00  | 90.00  | 3.216 | 52.488  | 41.827  | 16.00 | 24.00  | 40.00  | 68.00  | 106.00  |
| 0.10 | 3.026 | 0.2588440 | 0.0187933 | 1.20 | 1.20 | 14.522  | 6.906   | 7.00  | 10.00  | 13.00  | 18.00  | 24.00  | 3.216 | 15.473  | 7.458   | 8.00  | 10.00  | 14.00  | 19.00  | 25.00   |
| 0.10 | 3.026 | 0.2588440 | 0.0187933 | 1.30 | 1.20 | 8.673   | 2.974   | 5.00  | 7.00   | 8.00   | 10.00  | 13.00  | 3.216 | 9.185   | 3.168   | 6.00  | 7.00   | 9.00   | 11.00  | 13.00   |
| 0.10 | 3.026 | 0.2588440 | 0.0187933 | 1.40 | 1.20 | 6.436   | 1.796   | 4.00  | 5.00   | 6.00   | 7.00   | 9.00   | 3.216 | 6.761   | 1.863   | 5.00  | 5.00   | 7.00   | 8.00   | 9.00    |
| 0.10 | 3.026 | 0.2588440 | 0.0187933 | 0.90 | 1.20 | 29.263  | 21.133  | 10.00 | 15.00  | 23.00  | 38.00  | 58.00  | 3.216 | 32.524  | 23.942  | 10.00 | 16.00  | 26.00  | 42.00  | 64.00   |
| 0.10 | 3.026 | 0.2588440 | 0.0187933 | 0.80 | 1.20 | 8.897   | 4.143   | 5.00  | 6.00   | 8.00   | 11.00  | 14.00  | 3.216 | 9.403   | 4.365   | 5.00  | 6.00   | 8.00   | 11.00  | 15.00   |
| 0.10 | 3.026 | 0.2588440 | 0.0187933 | 0.70 | 1.20 | 4.838   | 1.709   | 3.00  | 4.00   | 5.00   | 6.00   | 7.00   | 3.216 | 5.021   | 1.744   | 3.00  | 4.00   | 5.00   | 6.00   | 7.00    |
| 0.10 | 3.026 | 0.2588440 | 0.0187933 | 0.60 | 1.20 | 3.166   | 0.958   | 2.00  | 3.00   | 3.00   | 4.00   | 4.00   | 3.216 | 3.303   | 0.981   | 2.00  | 3.00   | 3.00   | 4.00   | 5.00    |
| 0.10 | 3.026 | 0.2588440 | 0.0187933 | 0.50 | 1.20 | 2.307   | 0.621   | 2.00  | 2.00   | 2.00   | 3.00   | 3.00   | 3.216 | 2.385   | 0.633   | 2.00  | 2.00   | 2.00   | 3.00   | 3.00    |
| 0.10 | 3.026 | 0.2588440 | 0.0187933 | 1.10 | 1.30 | 45.266  | 33.609  | 14.00 | 22.00  | 36.00  | 59.00  | 89.00  | 3.216 | 53.046  | 41.165  | 16.00 | 24.00  | 41.00  | 69.00  | 107.00  |
| 0.10 | 3.026 | 0.2588440 | 0.0187933 | 1.20 | 1.30 | 14.454  | 6.878   | 7.00  | 10.00  | 13.00  | 18.00  | 24.00  | 3.216 | 15.486  | 7.430   | 8.00  | 10.00  | 14.00  | 19.00  | 25.00   |
| 0.10 | 3.026 |           |           |      |      |         |         |       |        |        |        |        |       |         |         |       |        |        |        |         |

|      |       |           |           |      |      |         |         |       |        |        |        |        |       |         |         |       |        |        |        |         |
|------|-------|-----------|-----------|------|------|---------|---------|-------|--------|--------|--------|--------|-------|---------|---------|-------|--------|--------|--------|---------|
| 0.10 | 3.026 | 0.2588440 | 0.0187933 | 0.60 | 1.30 | 3.161   | 0.964   | 2.00  | 3.00   | 3.00   | 4.00   | 4.00   | 3.216 | 3.303   | 0.994   | 2.00  | 3.00   | 3.00   | 4.00   | 5.00    |
| 0.10 | 3.026 | 0.2588440 | 0.0187933 | 0.50 | 1.30 | 2.317   | 0.623   | 2.00  | 2.00   | 2.00   | 3.00   | 3.00   | 3.216 | 2.374   | 0.621   | 2.00  | 2.00   | 2.00   | 3.00   | 3.00    |
| 0.10 | 3.026 | 0.2588440 | 0.0187933 | 1.10 | 1.40 | 44.604  | 32.586  | 14.00 | 22.00  | 36.00  | 57.00  | 88.00  | 3.216 | 51.768  | 39.660  | 16.00 | 24.00  | 40.00  | 67.00  | 103.10  |
| 0.10 | 3.026 | 0.2588440 | 0.0187933 | 1.20 | 1.40 | 14.454  | 6.870   | 7.00  | 10.00  | 13.00  | 18.00  | 24.00  | 3.216 | 15.535  | 7.533   | 8.00  | 10.00  | 14.00  | 19.00  | 25.00   |
| 0.10 | 3.026 | 0.2588440 | 0.0187933 | 1.30 | 1.40 | 8.663   | 2.949   | 5.00  | 7.00   | 8.00   | 10.00  | 13.00  | 3.216 | 9.192   | 3.203   | 6.00  | 7.00   | 9.00   | 11.00  | 13.00   |
| 0.10 | 3.026 | 0.2588440 | 0.0187933 | 1.40 | 1.40 | 6.422   | 1.781   | 4.00  | 5.00   | 6.00   | 7.00   | 9.00   | 3.216 | 6.747   | 1.897   | 5.00  | 5.00   | 6.00   | 8.00   | 9.00    |
| 0.10 | 3.026 | 0.2588440 | 0.0187933 | 0.90 | 1.40 | 28.486  | 20.058  | 10.00 | 14.00  | 23.00  | 37.00  | 54.00  | 3.216 | 32.524  | 23.861  | 10.00 | 16.00  | 26.00  | 42.00  | 63.00   |
| 0.10 | 3.026 | 0.2588440 | 0.0187933 | 0.80 | 1.40 | 8.852   | 4.137   | 5.00  | 6.00   | 8.00   | 11.00  | 14.00  | 3.216 | 9.273   | 4.370   | 5.00  | 6.00   | 8.00   | 11.00  | 15.00   |
| 0.10 | 3.026 | 0.2588440 | 0.0187933 | 0.70 | 1.40 | 4.841   | 1.722   | 3.00  | 4.00   | 5.00   | 6.00   | 7.00   | 3.216 | 5.046   | 1.783   | 3.00  | 4.00   | 5.00   | 6.00   | 7.00    |
| 0.10 | 3.026 | 0.2588440 | 0.0187933 | 0.60 | 1.40 | 3.177   | 0.967   | 2.00  | 3.00   | 3.00   | 4.00   | 4.00   | 3.216 | 3.271   | 0.975   | 2.00  | 3.00   | 3.00   | 4.00   | 5.00    |
| 0.10 | 3.026 | 0.2588440 | 0.0187933 | 0.50 | 1.40 | 2.316   | 0.614   | 2.00  | 2.00   | 2.00   | 3.00   | 3.00   | 3.216 | 2.371   | 0.622   | 2.00  | 2.00   | 2.00   | 3.00   | 3.00    |
| 0.10 | 3.026 | 0.2588440 | 0.0187933 | 1.10 | 0.90 | 42.826  | 32.491  | 13.00 | 20.00  | 33.00  | 56.00  | 85.00  | 3.216 | 50.273  | 38.549  | 15.00 | 23.00  | 39.00  | 66.00  | 100.00  |
| 0.10 | 3.026 | 0.2588440 | 0.0187933 | 1.20 | 0.90 | 14.332  | 6.868   | 7.00  | 10.00  | 13.00  | 17.00  | 23.00  | 3.216 | 15.479  | 7.416   | 8.00  | 10.00  | 14.00  | 19.00  | 25.00   |
| 0.10 | 3.026 | 0.2588440 | 0.0187933 | 1.30 | 0.90 | 8.655   | 3.015   | 5.00  | 7.00   | 8.00   | 10.00  | 13.00  | 3.216 | 9.204   | 3.211   | 6.00  | 7.00   | 9.00   | 11.00  | 13.00   |
| 0.10 | 3.026 | 0.2588440 | 0.0187933 | 1.40 | 0.90 | 6.417   | 1.789   | 4.00  | 5.00   | 6.00   | 7.00   | 9.00   | 3.216 | 6.741   | 1.865   | 5.00  | 5.00   | 6.00   | 8.00   | 9.00    |
| 0.10 | 3.026 | 0.2588440 | 0.0187933 | 0.90 | 0.90 | 28.504  | 20.790  | 9.00  | 14.00  | 23.00  | 36.00  | 55.00  | 3.216 | 31.465  | 22.802  | 10.00 | 15.00  | 25.00  | 41.00  | 61.00   |
| 0.10 | 3.026 | 0.2588440 | 0.0187933 | 0.80 | 0.90 | 8.962   | 4.124   | 5.00  | 6.00   | 8.00   | 11.00  | 14.00  | 3.216 | 9.368   | 4.369   | 5.00  | 6.00   | 8.00   | 12.00  | 15.00   |
| 0.10 | 3.026 | 0.2588440 | 0.0187933 | 0.70 | 0.90 | 4.808   | 1.726   | 3.00  | 4.00   | 5.00   | 6.00   | 7.00   | 3.216 | 5.034   | 1.767   | 3.00  | 4.00   | 5.00   | 6.00   | 7.00    |
| 0.10 | 3.026 | 0.2588440 | 0.0187933 | 0.60 | 0.90 | 3.181   | 0.957   | 2.00  | 3.00   | 3.00   | 4.00   | 4.00   | 3.216 | 3.308   | 0.995   | 2.00  | 3.00   | 3.00   | 4.00   | 5.00    |
| 0.10 | 3.026 | 0.2588440 | 0.0187933 | 0.50 | 0.90 | 2.317   | 0.617   | 2.00  | 2.00   | 2.00   | 3.00   | 3.00   | 3.216 | 2.380   | 0.633   | 2.00  | 2.00   | 2.00   | 3.00   | 3.00    |
| 0.10 | 3.026 | 0.2588440 | 0.0187933 | 1.10 | 0.80 | 39.489  | 28.931  | 13.00 | 19.00  | 31.00  | 51.00  | 78.00  | 3.216 | 45.129  | 33.793  | 14.00 | 21.00  | 35.00  | 59.00  | 89.00   |
| 0.10 | 3.026 | 0.2588440 | 0.0187933 | 1.20 | 0.80 | 14.135  | 6.628   | 7.00  | 9.00   | 13.00  | 17.00  | 23.00  | 3.216 | 15.183  | 7.220   | 8.00  | 10.00  | 14.00  | 19.00  | 25.00   |
| 0.10 | 3.026 | 0.2588440 | 0.0187933 | 1.30 | 0.80 | 8.695   | 3.039   | 5.00  | 7.00   | 8.00   | 10.00  | 13.00  | 3.216 | 9.150   | 3.128   | 6.00  | 7.00   | 9.00   | 11.00  | 13.00   |
| 0.10 | 3.026 | 0.2588440 | 0.0187933 | 1.40 | 0.80 | 6.461   | 1.808   | 4.00  | 5.00   | 6.00   | 7.00   | 9.00   | 3.216 | 6.697   | 1.856   | 5.00  | 5.00   | 6.00   | 8.00   | 9.00    |
| 0.10 | 3.026 | 0.2588440 | 0.0187933 | 0.90 | 0.80 | 26.903  | 18.680  | 9.00  | 14.00  | 22.00  | 35.00  | 51.00  | 3.216 | 30.061  | 21.228  | 10.00 | 15.00  | 24.00  | 39.00  | 58.00   |
| 0.10 | 3.026 | 0.2588440 | 0.0187933 | 0.80 | 0.80 | 8.851   | 4.103   | 5.00  | 6.00   | 8.00   | 11.00  | 14.00  | 3.216 | 9.311   | 4.265   | 5.00  | 6.00   | 8.00   | 11.00  | 15.00   |
| 0.10 | 3.026 | 0.2588440 | 0.0187933 | 0.70 | 0.80 | 4.804   | 1.698   | 3.00  | 4.00   | 5.00   | 6.00   | 7.00   | 3.216 | 5.017   | 1.805   | 3.00  | 4.00   | 5.00   | 6.00   | 7.00    |
| 0.10 | 3.026 | 0.2588440 | 0.0187933 | 0.60 | 0.80 | 3.178   | 0.961   | 2.00  | 3.00   | 3.00   | 4.00   | 4.00   | 3.216 | 3.292   | 0.989   | 2.00  | 3.00   | 3.00   | 4.00   | 5.00    |
| 0.10 | 3.026 | 0.2588440 | 0.0187933 | 0.50 | 0.80 | 2.300   | 0.607   | 2.00  | 2.00   | 2.00   | 3.00   | 3.00   | 3.216 | 2.380   | 0.617   | 2.00  | 2.00   | 2.00   | 3.00   | 3.00    |
| 0.10 | 3.026 | 0.2588440 | 0.0187933 | 1.10 | 0.70 | 32.699  | 22.757  | 11.00 | 17.00  | 27.00  | 42.00  | 62.00  | 3.216 | 37.934  | 27.380  | 13.00 | 19.00  | 30.00  | 48.00  | 73.00   |
| 0.10 | 3.026 | 0.2588440 | 0.0187933 | 1.20 | 0.70 | 13.923  | 6.412   | 7.00  | 9.00   | 13.00  | 17.00  | 22.00  | 3.216 | 15.042  | 7.139   | 8.00  | 10.00  | 13.00  | 18.00  | 24.00   |
| 0.10 | 3.026 | 0.2588440 | 0.0187933 | 1.30 | 0.70 | 8.564   | 2.906   | 5.00  | 6.00   | 8.00   | 10.00  | 12.00  | 3.216 | 9.080   | 3.068   | 6.00  | 7.00   | 9.00   | 11.00  | 13.00   |
| 0.10 | 3.026 | 0.2588440 | 0.0187933 | 1.40 | 0.70 | 6.423   | 1.780   | 4.00  | 5.00   | 6.00   | 7.00   | 9.00   | 3.216 | 6.732   | 1.853   | 5.00  | 5.00   | 6.00   | 8.00   | 9.00    |
| 0.10 | 3.026 | 0.2588440 | 0.0187933 | 0.90 | 0.70 | 24.586  | 16.234  | 9.00  | 13.00  | 21.00  | 31.25  | 45.00  | 3.216 | 27.370  | 18.700  | 10.00 | 14.00  | 22.00  | 35.00  | 51.00   |
| 0.10 | 3.026 | 0.2588440 | 0.0187933 | 0.80 | 0.70 | 8.838   | 4.013   | 5.00  | 6.00   | 8.00   | 11.00  | 14.00  | 3.216 | 9.359   | 4.301   | 5.00  | 6.00   | 8.00   | 11.00  | 15.00   |
| 0.10 | 3.026 | 0.2588440 | 0.0187933 | 0.70 | 0.70 | 4.800   | 1.701   | 3.00  | 4.00   | 5.00   | 6.00   | 7.00   | 3.216 | 5.033   | 1.788   | 3.00  | 4.00   | 5.00   | 6.00   | 7.00    |
| 0.10 | 3.026 | 0.2588440 | 0.0187933 | 0.60 | 0.70 | 3.185   | 0.966   | 2.00  | 3.00   | 3.00   | 4.00   | 4.00   | 3.216 | 3.291   | 0.996   | 2.00  | 3.00   | 3.00   | 4.00   | 5.00    |
| 0.10 | 3.026 | 0.2588440 | 0.0187933 | 0.50 | 0.70 | 2.310   | 0.606   | 2.00  | 2.00   | 2.00   | 3.00   | 3.00   | 3.216 | 2.376   | 0.622   | 2.00  | 2.00   | 2.00   | 3.00   | 3.00    |
| 0.10 | 3.026 | 0.2588440 | 0.0187933 | 1.10 | 0.60 | 24.659  | 15.306  | 10.00 | 14.00  | 21.00  | 31.00  | 44.00  | 3.216 | 27.859  | 17.754  | 11.00 | 15.00  | 23.00  | 35.00  | 51.00   |
| 0.10 | 3.026 | 0.2588440 | 0.0187933 | 1.20 | 0.60 | 13.258  | 5.809   | 7.00  | 9.00   | 12.00  | 16.00  | 21.00  | 3.216 | 14.323  | 6.341   | 8.00  | 10.00  | 13.00  | 17.00  | 23.00   |
| 0.10 | 3.026 | 0.2588440 | 0.0187933 | 1.30 | 0.60 | 8.571   | 2.948   | 5.00  | 6.00   | 8.00   | 10.00  | 12.00  | 3.216 | 9.031   | 3.059   | 6.00  | 7.00   | 8.00   | 11.00  | 13.00   |
| 0.10 | 3.026 | 0.2588440 | 0.0187933 | 1.40 | 0.60 | 6.426   | 1.792   | 4.00  | 5.00   | 6.00   | 7.00   | 9.00   | 3.216 | 6.733   | 1.853   | 5.00  | 5.00   | 6.00   | 8.00   | 9.00    |
| 0.10 | 3.026 | 0.2588440 | 0.0187933 | 0.90 | 0.60 | 20.456  | 12.485  | 8.00  | 12.00  | 17.00  | 26.00  | 37.00  | 3.216 | 22.376  | 13.559  | 9.00  | 13.00  | 19.00  | 28.00  | 41.00   |
| 0.10 | 3.026 | 0.2588440 | 0.0187933 | 0.80 | 0.60 | 8.695   | 3.854   | 5.00  | 6.00   | 8.00   | 11.00  | 14.00  | 3.216 | 9.051   | 4.016   | 5.00  | 6.00   | 8.00   | 11.00  | 14.00   |
| 0.10 | 3.026 | 0.2588440 | 0.0187933 | 0.70 | 0.60 | 4.840   | 1.736   | 3.00  | 4.00   | 5.00   | 6.00   | 7.00   | 3.216 | 5.025   | 1.764   | 3.00  | 4.00   | 5.00   | 6.00   | 7.00    |
| 0.10 | 3.026 | 0.2588440 | 0.0187933 | 0.60 | 0.60 | 3.179   | 0.960   | 2.00  | 3.00   | 3.00   | 4.00   | 4.00   | 3.216 | 3.310   | 1.000   | 2.00  | 3.00   | 3.00   | 4.00   | 5.00    |
| 0.10 | 3.026 | 0.2588440 | 0.0187933 | 0.50 | 0.60 | 2.297   | 0.605   | 2.00  | 2.00   | 2.00   | 3.00   | 3.00   | 3.216 | 2.380   | 0.627   | 2.00  | 2.00   | 2.00   | 3.00   | 3.00    |
| 0.10 | 3.026 | 0.2588440 | 0.0187933 | 1.10 | 0.50 | 17.465  | 9.130   | 8.00  | 11.00  | 15.00  | 22.00  | 29.00  | 3.216 | 18.815  | 9.983   | 9.00  | 12.00  | 16.00  | 23.00  | 32.00   |
| 0.10 | 3.026 | 0.2588440 | 0.0187933 | 1.20 | 0.50 | 11.952  | 4.877   | 7.00  | 8.00   | 11.00  | 14.00  | 18.00  | 3.216 | 12.846  | 5.215   | 7.00  | 9.00   | 12.00  | 15.00  | 20.00   |
| 0.10 | 3.026 | 0.2588440 | 0.0187933 | 1.30 | 0.50 | 8.258   | 2.648   | 5.00  | 6.00   | 8.00   | 10.00  | 12.00  | 3.216 | 8.813   | 2.859   | 6.00  | 7.00   | 8.00   | 10.00  | 13.00   |
| 0.10 | 3.026 | 0.2588440 | 0.0187933 | 1.40 | 0.50 | 6.366   | 1.747   | 4.00  | 5.00   | 6.00   | 7.00   | 9.00   | 3.216 | 6.694   | 1.832   | 5.00  | 5.00   | 6.00   | 8.00   | 9.00    |
| 0.10 | 3.026 | 0.2588440 | 0.0187933 | 0.90 | 0.50 | 15.399  | 7.853   | 7.00  | 10.00  | 14.00  | 19.00  | 26.00  | 3.216 | 16.867  | 8.764   | 8.00  | 11.00  | 15.00  | 21.00  | 28.00   |
| 0.10 | 3.026 | 0.2588440 | 0.0187933 | 0.80 | 0.50 | 8.411   | 3.546   | 5.00  | 6.00   | 8.00   | 10.00  | 13.00  | 3.216 | 8.855   | 3.700   | 5.00  | 6.00   | 8.00   | 11.00  | 14.00   |
| 0.10 | 3.026 | 0.2588440 | 0.0187933 | 0.70 | 0.50 | 4.815   | 1.720   | 3.00  | 4.00   | 5.00   | 6.00   | 7.00   | 3.216 | 5.034   | 1.773   | 3.00  | 4.00   | 5.00   | 6.00   | 7.00    |
| 0.10 | 3.026 | 0.2588440 | 0.0187933 | 0.60 | 0.50 | 3.172   | 0.966   | 2.00  | 3.00   | 3.00   | 4.00   | 4.00   | 3.216 | 3.305   | 0.994   | 2.00  | 3.00   | 3.00   | 4.00   | 5.00    |
| 0.10 | 3.026 | 0.2588440 | 0.0187933 | 0.50 | 0.50 | 2.304   | 0.606   | 2.00  | 2.00   | 2.00   | 3.00   | 3.00   | 3.216 | 2.385   | 0.630   | 2.00  | 2.00   | 2.00   | 3.00   | 3.00    |
| 0.15 | 3.219 | 0.3210252 | 0.0284260 | 1.00 | 1.00 | 370.785 | 364.849 | 45.00 | 112.00 | 260.00 | 511.00 | 845.00 | 3.402 | 503.858 | 500.278 | 59.00 | 149.00 | 346.00 | 700.00 | 1147.10 |
| 0.15 | 3.219 | 0.3210252 | 0.0284260 | 1.10 | 1.10 | 61.272  | 52.282  |       |        |        |        |        |       |         |         |       |        |        |        |         |

|      |       |           |           |      |      |        |        |       |       |       |       |        |       |        |        |       |       |       |        |        |
|------|-------|-----------|-----------|------|------|--------|--------|-------|-------|-------|-------|--------|-------|--------|--------|-------|-------|-------|--------|--------|
| 0.15 | 3.219 | 0.3210252 | 0.0284260 | 0.80 | 1.10 | 8.549  | 4.541  | 4.00  | 5.00  | 8.00  | 11.00 | 14.00  | 3.402 | 9.135  | 4.904  | 4.00  | 6.00  | 8.00  | 11.00  | 16.00  |
| 0.15 | 3.219 | 0.3210252 | 0.0284260 | 0.70 | 1.10 | 4.408  | 1.766  | 3.00  | 3.00  | 4.00  | 5.00  | 7.00   | 3.402 | 4.634  | 1.825  | 3.00  | 3.00  | 4.00  | 6.00   | 7.00   |
| 0.15 | 3.219 | 0.3210252 | 0.0284260 | 0.60 | 1.10 | 2.871  | 0.950  | 2.00  | 2.00  | 3.00  | 3.00  | 4.00   | 3.402 | 2.948  | 0.972  | 2.00  | 2.00  | 3.00  | 3.00   | 4.00   |
| 0.15 | 3.219 | 0.3210252 | 0.0284260 | 0.50 | 1.10 | 2.076  | 0.609  | 1.00  | 2.00  | 2.00  | 2.00  | 3.00   | 3.402 | 2.131  | 0.605  | 1.00  | 2.00  | 2.00  | 2.00   | 3.00   |
| 0.15 | 3.219 | 0.3210252 | 0.0284260 | 1.10 | 1.20 | 62.841 | 54.367 | 14.00 | 24.00 | 47.00 | 84.00 | 133.00 | 3.402 | 74.967 | 65.824 | 16.00 | 28.00 | 55.00 | 101.00 | 159.00 |
| 0.15 | 3.219 | 0.3210252 | 0.0284260 | 1.20 | 1.20 | 15.693 | 9.186  | 7.00  | 9.00  | 13.00 | 19.00 | 27.00  | 3.402 | 17.080 | 10.137 | 7.00  | 10.00 | 14.00 | 21.00  | 30.00  |
| 0.15 | 3.219 | 0.3210252 | 0.0284260 | 1.30 | 1.20 | 8.561  | 3.601  | 5.00  | 6.00  | 8.00  | 10.00 | 13.00  | 3.402 | 9.080  | 3.815  | 5.00  | 6.00  | 8.00  | 11.00  | 14.00  |
| 0.15 | 3.219 | 0.3210252 | 0.0284260 | 1.40 | 1.20 | 6.068  | 1.940  | 4.00  | 5.00  | 6.00  | 7.00  | 9.00   | 3.402 | 6.395  | 2.079  | 4.00  | 5.00  | 6.00  | 7.00   | 9.00   |
| 0.15 | 3.219 | 0.3210252 | 0.0284260 | 0.90 | 1.20 | 32.370 | 25.949 | 9.00  | 14.00 | 25.00 | 43.00 | 65.00  | 3.402 | 36.290 | 29.504 | 9.00  | 16.00 | 28.00 | 48.00  | 75.00  |
| 0.15 | 3.219 | 0.3210252 | 0.0284260 | 0.80 | 1.20 | 8.571  | 4.590  | 4.00  | 5.00  | 8.00  | 11.00 | 15.00  | 3.402 | 9.065  | 4.768  | 4.00  | 6.00  | 8.00  | 11.00  | 15.00  |
| 0.15 | 3.219 | 0.3210252 | 0.0284260 | 0.70 | 1.20 | 4.389  | 1.734  | 3.00  | 3.00  | 4.00  | 5.00  | 7.00   | 3.402 | 4.604  | 1.826  | 3.00  | 3.00  | 4.00  | 6.00   | 7.00   |
| 0.15 | 3.219 | 0.3210252 | 0.0284260 | 0.60 | 1.20 | 2.854  | 0.943  | 2.00  | 2.00  | 3.00  | 3.00  | 4.00   | 3.402 | 2.948  | 0.979  | 2.00  | 2.00  | 3.00  | 3.00   | 4.00   |
| 0.15 | 3.219 | 0.3210252 | 0.0284260 | 0.50 | 1.20 | 2.070  | 0.613  | 1.00  | 2.00  | 2.00  | 2.00  | 3.00   | 3.402 | 2.134  | 0.607  | 1.00  | 2.00  | 2.00  | 2.00   | 3.00   |
| 0.15 | 3.219 | 0.3210252 | 0.0284260 | 1.10 | 1.30 | 62.694 | 53.985 | 14.00 | 25.00 | 46.00 | 84.00 | 134.00 | 3.402 | 75.402 | 66.532 | 16.00 | 29.00 | 55.00 | 101.00 | 163.00 |
| 0.15 | 3.219 | 0.3210252 | 0.0284260 | 1.20 | 1.30 | 15.627 | 9.113  | 7.00  | 9.00  | 13.00 | 20.00 | 28.00  | 3.402 | 17.107 | 10.281 | 7.00  | 10.00 | 14.00 | 21.00  | 30.00  |
| 0.15 | 3.219 | 0.3210252 | 0.0284260 | 1.30 | 1.30 | 8.567  | 3.565  | 5.00  | 6.00  | 8.00  | 10.00 | 13.00  | 3.402 | 9.026  | 3.790  | 5.00  | 6.00  | 8.00  | 11.00  | 14.00  |
| 0.15 | 3.219 | 0.3210252 | 0.0284260 | 1.40 | 1.30 | 6.088  | 1.988  | 4.00  | 5.00  | 6.00  | 7.00  | 9.00   | 3.402 | 6.379  | 2.099  | 4.00  | 5.00  | 6.00  | 7.00   | 9.00   |
| 0.15 | 3.219 | 0.3210252 | 0.0284260 | 0.90 | 1.30 | 32.829 | 26.430 | 9.00  | 14.00 | 25.00 | 43.00 | 68.00  | 3.402 | 36.308 | 29.340 | 10.00 | 16.00 | 28.00 | 48.00  | 74.00  |
| 0.15 | 3.219 | 0.3210252 | 0.0284260 | 0.80 | 1.30 | 8.531  | 4.500  | 4.00  | 5.00  | 8.00  | 11.00 | 14.00  | 3.402 | 9.152  | 4.948  | 4.00  | 6.00  | 8.00  | 11.00  | 15.00  |
| 0.15 | 3.219 | 0.3210252 | 0.0284260 | 0.70 | 1.30 | 4.425  | 1.740  | 3.00  | 3.00  | 4.00  | 5.00  | 7.00   | 3.402 | 4.605  | 1.828  | 3.00  | 3.00  | 4.00  | 6.00   | 7.00   |
| 0.15 | 3.219 | 0.3210252 | 0.0284260 | 0.60 | 1.30 | 2.855  | 0.947  | 2.00  | 2.00  | 3.00  | 3.00  | 4.00   | 3.402 | 2.955  | 0.964  | 2.00  | 2.00  | 3.00  | 3.00   | 4.00   |
| 0.15 | 3.219 | 0.3210252 | 0.0284260 | 0.50 | 1.30 | 2.064  | 0.609  | 1.00  | 2.00  | 2.00  | 2.00  | 3.00   | 3.402 | 2.124  | 0.619  | 1.00  | 2.00  | 2.00  | 2.00   | 3.00   |
| 0.15 | 3.219 | 0.3210252 | 0.0284260 | 1.10 | 1.40 | 61.864 | 52.953 | 14.00 | 24.00 | 46.00 | 83.25 | 131.00 | 3.402 | 75.839 | 65.856 | 16.00 | 29.00 | 57.00 | 102.00 | 160.00 |
| 0.15 | 3.219 | 0.3210252 | 0.0284260 | 1.20 | 1.40 | 15.607 | 9.051  | 7.00  | 9.00  | 13.00 | 19.25 | 27.00  | 3.402 | 17.017 | 10.148 | 7.00  | 10.00 | 14.00 | 21.00  | 30.00  |
| 0.15 | 3.219 | 0.3210252 | 0.0284260 | 1.30 | 1.40 | 8.543  | 3.541  | 5.00  | 6.00  | 8.00  | 10.00 | 13.00  | 3.402 | 9.080  | 3.813  | 5.00  | 6.00  | 8.00  | 11.00  | 14.00  |
| 0.15 | 3.219 | 0.3210252 | 0.0284260 | 1.40 | 1.40 | 6.077  | 1.986  | 4.00  | 5.00  | 6.00  | 7.00  | 9.00   | 3.402 | 6.375  | 2.070  | 4.00  | 5.00  | 6.00  | 7.00   | 9.00   |
| 0.15 | 3.219 | 0.3210252 | 0.0284260 | 0.90 | 1.40 | 33.087 | 26.821 | 9.00  | 14.00 | 25.00 | 44.00 | 68.00  | 3.402 | 36.840 | 29.721 | 9.00  | 16.00 | 28.00 | 49.00  | 76.00  |
| 0.15 | 3.219 | 0.3210252 | 0.0284260 | 0.80 | 1.40 | 8.557  | 4.611  | 4.00  | 5.00  | 8.00  | 11.00 | 14.00  | 3.402 | 9.095  | 4.809  | 4.00  | 6.00  | 8.00  | 11.00  | 15.00  |
| 0.15 | 3.219 | 0.3210252 | 0.0284260 | 0.70 | 1.40 | 4.400  | 1.781  | 2.00  | 3.00  | 4.00  | 5.00  | 7.00   | 3.402 | 4.615  | 1.817  | 3.00  | 3.00  | 4.00  | 6.00   | 7.00   |
| 0.15 | 3.219 | 0.3210252 | 0.0284260 | 0.60 | 1.40 | 2.876  | 0.963  | 2.00  | 2.00  | 3.00  | 3.00  | 4.00   | 3.402 | 2.959  | 0.975  | 2.00  | 2.00  | 3.00  | 3.00   | 4.00   |
| 0.15 | 3.219 | 0.3210252 | 0.0284260 | 0.50 | 1.40 | 2.068  | 0.608  | 1.00  | 2.00  | 2.00  | 2.00  | 3.00   | 3.402 | 2.128  | 0.610  | 1.00  | 2.00  | 2.00  | 2.00   | 3.00   |
| 0.15 | 3.219 | 0.3210252 | 0.0284260 | 1.10 | 0.90 | 56.334 | 47.933 | 13.00 | 22.00 | 42.00 | 75.00 | 119.00 | 3.402 | 68.695 | 59.499 | 15.00 | 26.75 | 51.00 | 92.00  | 146.00 |
| 0.15 | 3.219 | 0.3210252 | 0.0284260 | 1.20 | 0.90 | 15.351 | 8.907  | 7.00  | 9.00  | 13.00 | 19.00 | 27.00  | 3.402 | 16.923 | 10.080 | 7.00  | 10.00 | 14.00 | 21.00  | 30.00  |
| 0.15 | 3.219 | 0.3210252 | 0.0284260 | 1.30 | 0.90 | 8.428  | 3.479  | 5.00  | 6.00  | 8.00  | 10.00 | 13.00  | 3.402 | 9.033  | 3.764  | 5.00  | 6.00  | 8.00  | 11.00  | 14.00  |
| 0.15 | 3.219 | 0.3210252 | 0.0284260 | 1.40 | 0.90 | 6.041  | 1.948  | 4.00  | 5.00  | 6.00  | 7.00  | 9.00   | 3.402 | 6.354  | 2.068  | 4.00  | 5.00  | 6.00  | 7.00   | 9.00   |
| 0.15 | 3.219 | 0.3210252 | 0.0284260 | 0.90 | 0.90 | 31.281 | 25.002 | 8.00  | 14.00 | 24.00 | 41.00 | 63.00  | 3.402 | 35.048 | 28.667 | 9.00  | 15.00 | 26.00 | 46.00  | 72.00  |
| 0.15 | 3.219 | 0.3210252 | 0.0284260 | 0.80 | 0.90 | 8.536  | 4.532  | 4.00  | 5.00  | 7.00  | 11.00 | 14.00  | 3.402 | 9.115  | 4.871  | 4.00  | 6.00  | 8.00  | 11.00  | 15.00  |
| 0.15 | 3.219 | 0.3210252 | 0.0284260 | 0.70 | 0.90 | 4.397  | 1.777  | 2.00  | 3.00  | 4.00  | 5.00  | 7.00   | 3.402 | 4.585  | 1.795  | 3.00  | 3.00  | 4.00  | 6.00   | 7.00   |
| 0.15 | 3.219 | 0.3210252 | 0.0284260 | 0.60 | 0.90 | 2.865  | 0.960  | 2.00  | 2.00  | 3.00  | 3.00  | 4.00   | 3.402 | 2.958  | 0.977  | 2.00  | 2.00  | 3.00  | 3.00   | 4.00   |
| 0.15 | 3.219 | 0.3210252 | 0.0284260 | 0.50 | 0.90 | 2.064  | 0.598  | 1.00  | 2.00  | 2.00  | 2.00  | 3.00   | 3.402 | 2.127  | 0.613  | 1.00  | 2.00  | 2.00  | 2.00   | 3.00   |
| 0.15 | 3.219 | 0.3210252 | 0.0284260 | 1.10 | 0.80 | 49.016 | 41.088 | 12.00 | 20.00 | 36.00 | 65.00 | 103.00 | 3.402 | 60.421 | 52.027 | 14.00 | 24.00 | 45.00 | 81.00  | 127.00 |
| 0.15 | 3.219 | 0.3210252 | 0.0284260 | 1.20 | 0.80 | 15.140 | 8.574  | 7.00  | 9.00  | 13.00 | 19.00 | 26.00  | 3.402 | 16.607 | 9.716  | 7.00  | 10.00 | 14.00 | 21.00  | 29.00  |
| 0.15 | 3.219 | 0.3210252 | 0.0284260 | 1.30 | 0.80 | 8.490  | 3.555  | 5.00  | 6.00  | 8.00  | 10.00 | 13.00  | 3.402 | 9.048  | 3.788  | 5.00  | 6.00  | 8.00  | 11.00  | 14.00  |
| 0.15 | 3.219 | 0.3210252 | 0.0284260 | 1.40 | 0.80 | 6.048  | 1.997  | 4.00  | 5.00  | 6.00  | 7.00  | 9.00   | 3.402 | 6.350  | 2.080  | 4.00  | 5.00  | 6.00  | 7.00   | 9.00   |
| 0.15 | 3.219 | 0.3210252 | 0.0284260 | 0.90 | 0.80 | 29.380 | 22.793 | 8.00  | 13.00 | 23.00 | 39.00 | 59.00  | 3.402 | 33.281 | 26.775 | 9.00  | 15.00 | 25.00 | 44.00  | 68.00  |
| 0.15 | 3.219 | 0.3210252 | 0.0284260 | 0.80 | 0.80 | 8.500  | 4.396  | 4.00  | 5.00  | 8.00  | 11.00 | 14.00  | 3.402 | 8.936  | 4.732  | 4.00  | 6.00  | 8.00  | 11.00  | 15.00  |
| 0.15 | 3.219 | 0.3210252 | 0.0284260 | 0.70 | 0.80 | 4.402  | 1.742  | 3.00  | 3.00  | 4.00  | 5.00  | 7.00   | 3.402 | 4.576  | 1.806  | 3.00  | 3.00  | 4.00  | 6.00   | 7.00   |
| 0.15 | 3.219 | 0.3210252 | 0.0284260 | 0.60 | 0.80 | 2.865  | 0.941  | 2.00  | 2.00  | 3.00  | 3.00  | 4.00   | 3.402 | 2.960  | 0.974  | 2.00  | 2.00  | 3.00  | 3.00   | 4.00   |
| 0.15 | 3.219 | 0.3210252 | 0.0284260 | 0.50 | 0.80 | 2.068  | 0.612  | 1.00  | 2.00  | 2.00  | 2.00  | 3.00   | 3.402 | 2.123  | 0.613  | 1.00  | 2.00  | 2.00  | 2.00   | 3.00   |
| 0.15 | 3.219 | 0.3210252 | 0.0284260 | 1.10 | 0.70 | 40.288 | 32.191 | 11.00 | 18.00 | 31.00 | 52.00 | 82.00  | 3.402 | 47.458 | 39.248 | 12.00 | 20.00 | 36.00 | 63.00  | 99.00  |
| 0.15 | 3.219 | 0.3210252 | 0.0284260 | 1.20 | 0.70 | 14.801 | 8.295  | 7.00  | 9.00  | 13.00 | 18.00 | 26.00  | 3.402 | 16.122 | 9.238  | 7.00  | 10.00 | 14.00 | 20.00  | 28.00  |
| 0.15 | 3.219 | 0.3210252 | 0.0284260 | 1.30 | 0.70 | 8.393  | 3.452  | 5.00  | 6.00  | 8.00  | 10.00 | 13.00  | 3.402 | 8.950  | 3.630  | 5.00  | 6.00  | 8.00  | 11.00  | 14.00  |
| 0.15 | 3.219 | 0.3210252 | 0.0284260 | 1.40 | 0.70 | 6.074  | 1.964  | 4.00  | 5.00  | 6.00  | 7.00  | 9.00   | 3.402 | 6.363  | 2.057  | 4.00  | 5.00  | 6.00  | 7.00   | 9.00   |
| 0.15 | 3.219 | 0.3210252 | 0.0284260 | 0.90 | 0.70 | 26.262 | 19.381 | 8.00  | 13.00 | 21.00 | 34.00 | 52.00  | 3.402 | 29.743 | 22.866 | 9.00  | 14.00 | 23.00 | 39.00  | 59.00  |
| 0.15 | 3.219 | 0.3210252 | 0.0284260 | 0.80 | 0.70 | 8.421  | 4.425  | 4.00  | 5.00  | 7.00  | 10.00 | 14.00  | 3.402 | 9.027  | 4.780  | 4.00  | 6.00  | 8.00  | 11.00  | 15.00  |
| 0.15 | 3.219 | 0.3210252 | 0.0284260 | 0.70 | 0.70 | 4.394  | 1.722  | 2.90  | 3.00  | 4.00  | 5.00  | 7.00   | 3.402 | 4.585  | 1.789  | 3.00  | 3.00  | 4.00  | 6.00   | 7.00   |
| 0.15 | 3.219 | 0.3210252 | 0.0284260 | 0.60 | 0.70 | 2.861  | 0.941  | 2.00  | 2.00  | 3.00  | 3.00  | 4.00   | 3.402 | 2.965  | 0.975  | 2.00  | 2.00  | 3.00  | 3.00   | 4.00   |
| 0.15 | 3.219 | 0.3210252 | 0.0284260 | 0.50 | 0.70 | 2.063  | 0.607  | 1.00  |       |       |       |        |       |        |        |       |       |       |        |        |

|      |       |           |           |      |      |        |        |      |       |       |       |       |       |        |        |      |       |       |       |       |
|------|-------|-----------|-----------|------|------|--------|--------|------|-------|-------|-------|-------|-------|--------|--------|------|-------|-------|-------|-------|
| 0.15 | 3.219 | 0.3210252 | 0.0284260 | 0.90 | 0.60 | 21.668 | 15.454 | 7.00 | 11.00 | 17.00 | 28.00 | 42.00 | 3.402 | 24.511 | 17.402 | 8.00 | 12.00 | 20.00 | 31.00 | 47.00 |
| 0.15 | 3.219 | 0.3210252 | 0.0284260 | 0.80 | 0.60 | 8.264  | 4.111  | 4.00 | 5.00  | 7.00  | 10.00 | 14.00 | 3.402 | 8.804  | 4.627  | 4.00 | 6.00  | 8.00  | 11.00 | 15.00 |
| 0.15 | 3.219 | 0.3210252 | 0.0284260 | 0.70 | 0.60 | 4.413  | 1.733  | 3.00 | 3.00  | 4.00  | 5.00  | 7.00  | 3.402 | 4.600  | 1.834  | 3.00 | 3.00  | 4.00  | 6.00  | 7.00  |
| 0.15 | 3.219 | 0.3210252 | 0.0284260 | 0.60 | 0.60 | 2.866  | 0.947  | 2.00 | 2.00  | 3.00  | 3.00  | 4.00  | 3.402 | 2.957  | 0.974  | 2.00 | 2.00  | 3.00  | 3.00  | 4.00  |
| 0.15 | 3.219 | 0.3210252 | 0.0284260 | 0.50 | 0.60 | 2.072  | 0.605  | 1.00 | 2.00  | 2.00  | 2.00  | 3.00  | 3.402 | 2.131  | 0.620  | 1.00 | 2.00  | 2.00  | 2.00  | 3.00  |
| 0.15 | 3.219 | 0.3210252 | 0.0284260 | 1.10 | 0.50 | 19.071 | 12.220 | 8.00 | 11.00 | 16.00 | 24.00 | 35.00 | 3.402 | 21.319 | 13.797 | 8.00 | 12.00 | 18.00 | 27.00 | 39.00 |
| 0.15 | 3.219 | 0.3210252 | 0.0284260 | 1.20 | 0.50 | 12.313 | 6.031  | 6.00 | 8.00  | 11.00 | 15.00 | 20.00 | 3.402 | 13.368 | 6.806  | 7.00 | 9.00  | 12.00 | 16.00 | 22.00 |
| 0.15 | 3.219 | 0.3210252 | 0.0284260 | 1.30 | 0.50 | 8.079  | 3.095  | 5.00 | 6.00  | 7.00  | 10.00 | 12.00 | 3.402 | 8.576  | 3.325  | 5.00 | 6.00  | 8.00  | 10.00 | 13.00 |
| 0.15 | 3.219 | 0.3210252 | 0.0284260 | 1.40 | 0.50 | 6.003  | 1.931  | 4.00 | 5.00  | 6.00  | 7.00  | 8.00  | 3.402 | 6.274  | 1.965  | 4.00 | 5.00  | 6.00  | 7.00  | 9.00  |
| 0.15 | 3.219 | 0.3210252 | 0.0284260 | 0.90 | 0.50 | 16.201 | 9.883  | 7.00 | 9.00  | 14.00 | 20.00 | 29.00 | 3.402 | 17.787 | 11.119 | 7.00 | 10.00 | 15.00 | 22.25 | 32.00 |
| 0.15 | 3.219 | 0.3210252 | 0.0284260 | 0.80 | 0.50 | 7.964  | 3.860  | 4.00 | 5.00  | 7.00  | 10.00 | 13.00 | 3.402 | 8.440  | 4.146  | 4.00 | 5.00  | 8.00  | 11.00 | 14.00 |
| 0.15 | 3.219 | 0.3210252 | 0.0284260 | 0.70 | 0.50 | 4.383  | 1.721  | 3.00 | 3.00  | 4.00  | 5.00  | 7.00  | 3.402 | 4.589  | 1.787  | 3.00 | 3.00  | 4.00  | 6.00  | 7.00  |
| 0.15 | 3.219 | 0.3210252 | 0.0284260 | 0.60 | 0.50 | 2.859  | 0.948  | 2.00 | 2.00  | 3.00  | 3.00  | 4.00  | 3.402 | 2.958  | 0.964  | 2.00 | 2.00  | 3.00  | 3.00  | 4.00  |
| 0.15 | 3.219 | 0.3210252 | 0.0284260 | 0.50 | 0.50 | 2.079  | 0.610  | 1.00 | 2.00  | 2.00  | 2.00  | 3.00  | 3.402 | 2.143  | 0.619  | 1.00 | 2.00  | 2.00  | 2.00  | 3.00  |

**ARL<sub>0</sub> = 370**

**ARL<sub>0</sub> = 500**

| Case 3<br>$\phi=80$ |       |           |           |      |      |         |         |       |        |        |        |        |       |         |         |       |        |        |        |         |
|---------------------|-------|-----------|-----------|------|------|---------|---------|-------|--------|--------|--------|--------|-------|---------|---------|-------|--------|--------|--------|---------|
| 0.05                | 2.686 | 0.1809939 | 0.0093239 | 1.00 | 1.00 | 370.171 | 358.541 | 52.00 | 116.00 | 259.00 | 506.00 | 836.00 | 2.880 | 500.023 | 481.358 | 67.00 | 152.00 | 352.00 | 687.00 | 1124.00 |
| 0.05                | 2.686 | 0.1809939 | 0.0093239 | 1.10 | 1.10 | 61.870  | 43.224  | 22.00 | 32.00  | 50.00  | 79.00  | 118.00 | 2.880 | 70.577  | 50.589  | 24.00 | 35.00  | 56.00  | 89.00  | 134.10  |
| 0.05                | 2.686 | 0.1809939 | 0.0093239 | 1.20 | 1.10 | 23.232  | 10.551  | 12.00 | 16.00  | 21.00  | 28.00  | 37.00  | 2.880 | 24.816  | 11.617  | 13.00 | 17.00  | 22.00  | 30.00  | 40.00   |
| 0.05                | 2.686 | 0.1809939 | 0.0093239 | 1.30 | 1.10 | 14.306  | 4.905   | 9.00  | 11.00  | 13.00  | 17.00  | 21.00  | 2.880 | 15.156  | 5.129   | 10.00 | 11.00  | 14.00  | 18.00  | 22.00   |
| 0.05                | 2.686 | 0.1809939 | 0.0093239 | 1.40 | 1.10 | 10.786  | 3.011   | 7.00  | 9.00   | 10.00  | 12.00  | 15.00  | 2.880 | 11.394  | 3.151   | 8.00  | 9.00   | 11.00  | 13.00  | 16.00   |
| 0.05                | 2.686 | 0.1809939 | 0.0093239 | 0.90 | 1.10 | 43.149  | 29.119  | 15.00 | 23.00  | 36.00  | 55.00  | 80.00  | 2.880 | 48.349  | 33.630  | 16.00 | 25.00  | 40.00  | 62.00  | 91.00   |
| 0.05                | 2.686 | 0.1809939 | 0.0093239 | 0.80 | 1.10 | 14.582  | 6.635   | 7.00  | 10.00  | 13.00  | 18.00  | 23.00  | 2.880 | 15.514  | 7.092   | 8.00  | 10.00  | 14.00  | 19.00  | 25.00   |
| 0.05                | 2.686 | 0.1809939 | 0.0093239 | 0.70 | 1.10 | 8.090   | 2.924   | 5.00  | 6.00   | 8.00   | 10.00  | 12.00  | 2.880 | 8.428   | 2.969   | 5.00  | 6.00   | 8.00   | 10.00  | 12.00   |
| 0.05                | 2.686 | 0.1809939 | 0.0093239 | 0.60 | 1.10 | 5.290   | 1.656   | 3.00  | 4.00   | 5.00   | 6.00   | 7.00   | 2.880 | 5.488   | 1.672   | 4.00  | 4.00   | 5.00   | 6.00   | 8.00    |
| 0.05                | 2.686 | 0.1809939 | 0.0093239 | 0.50 | 1.10 | 3.754   | 1.048   | 3.00  | 3.00   | 4.00   | 4.00   | 5.00   | 2.880 | 3.880   | 1.077   | 3.00  | 3.00   | 4.00   | 4.00   | 5.00    |
| 0.05                | 2.686 | 0.1809939 | 0.0093239 | 1.10 | 1.20 | 59.114  | 40.479  | 21.00 | 31.00  | 48.00  | 76.00  | 111.00 | 2.880 | 67.260  | 47.815  | 23.00 | 34.00  | 54.00  | 86.00  | 129.00  |
| 0.05                | 2.686 | 0.1809939 | 0.0093239 | 1.20 | 1.20 | 23.152  | 10.445  | 12.00 | 16.00  | 21.00  | 28.00  | 37.00  | 2.880 | 24.692  | 11.255  | 13.00 | 17.00  | 22.00  | 30.00  | 39.00   |
| 0.05                | 2.686 | 0.1809939 | 0.0093239 | 1.30 | 1.20 | 14.353  | 4.444   | 9.00  | 11.00  | 13.00  | 17.00  | 21.00  | 2.880 | 15.255  | 5.157   | 10.00 | 12.00  | 14.00  | 18.00  | 22.00   |
| 0.05                | 2.686 | 0.1809939 | 0.0093239 | 1.40 | 1.20 | 10.789  | 3.013   | 7.00  | 9.00   | 10.00  | 12.00  | 15.00  | 2.880 | 11.377  | 3.133   | 8.00  | 9.00   | 11.00  | 13.00  | 16.00   |
| 0.05                | 2.686 | 0.1809939 | 0.0093239 | 0.90 | 1.20 | 42.615  | 28.664  | 15.00 | 23.00  | 35.00  | 55.00  | 79.00  | 2.880 | 46.446  | 31.567  | 16.00 | 24.00  | 38.00  | 60.00  | 88.00   |
| 0.05                | 2.686 | 0.1809939 | 0.0093239 | 0.80 | 1.20 | 14.775  | 6.795   | 7.00  | 10.00  | 13.00  | 18.00  | 24.00  | 2.880 | 15.448  | 7.103   | 8.00  | 10.00  | 14.00  | 19.00  | 25.00   |
| 0.05                | 2.686 | 0.1809939 | 0.0093239 | 0.70 | 1.20 | 8.088   | 2.934   | 5.00  | 6.00   | 8.00   | 10.00  | 12.00  | 2.880 | 8.473   | 3.050   | 5.00  | 6.00   | 8.00   | 10.00  | 13.00   |
| 0.05                | 2.686 | 0.1809939 | 0.0093239 | 0.60 | 1.20 | 5.241   | 1.625   | 3.00  | 4.00   | 5.00   | 6.00   | 7.00   | 2.880 | 5.481   | 1.666   | 4.00  | 4.00   | 5.00   | 6.00   | 8.00    |
| 0.05                | 2.686 | 0.1809939 | 0.0093239 | 0.50 | 1.20 | 3.736   | 1.037   | 3.00  | 3.00   | 4.00   | 4.00   | 5.00   | 2.880 | 3.868   | 1.051   | 3.00  | 3.00   | 4.00   | 4.00   | 5.00    |
| 0.05                | 2.686 | 0.1809939 | 0.0093239 | 1.10 | 1.30 | 55.350  | 36.059  | 21.00 | 30.00  | 46.00  | 70.25  | 103.00 | 2.880 | 62.828  | 41.949  | 23.00 | 33.00  | 51.00  | 81.00  | 119.00  |
| 0.05                | 2.686 | 0.1809939 | 0.0093239 | 1.20 | 1.30 | 22.734  | 10.147  | 12.00 | 16.00  | 21.00  | 28.00  | 36.00  | 2.880 | 24.525  | 11.097  | 13.00 | 17.00  | 22.00  | 30.00  | 39.00   |
| 0.05                | 2.686 | 0.1809939 | 0.0093239 | 1.30 | 1.30 | 14.393  | 4.897   | 9.00  | 11.00  | 14.00  | 17.00  | 21.00  | 2.880 | 15.209  | 5.125   | 10.00 | 12.00  | 14.00  | 18.00  | 22.00   |
| 0.05                | 2.686 | 0.1809939 | 0.0093239 | 1.40 | 1.30 | 10.783  | 2.922   | 7.00  | 9.00   | 10.00  | 12.00  | 15.00  | 2.880 | 11.350  | 3.101   | 8.00  | 9.00   | 11.00  | 13.00  | 15.00   |
| 0.05                | 2.686 | 0.1809939 | 0.0093239 | 0.90 | 1.30 | 40.883  | 26.206  | 15.00 | 22.00  | 34.00  | 52.00  | 75.00  | 2.880 | 44.958  | 29.462  | 17.00 | 24.00  | 37.00  | 57.00  | 84.00   |
| 0.05                | 2.686 | 0.1809939 | 0.0093239 | 0.80 | 1.30 | 14.586  | 6.565   | 7.00  | 10.00  | 13.00  | 18.00  | 23.00  | 2.880 | 15.660  | 7.094   | 8.00  | 11.00  | 14.00  | 19.00  | 25.00   |
| 0.05                | 2.686 | 0.1809939 | 0.0093239 | 0.70 | 1.30 | 8.137   | 2.914   | 5.00  | 6.00   | 8.00   | 10.00  | 12.00  | 2.880 | 8.480   | 3.070   | 5.00  | 6.00   | 8.00   | 10.00  | 13.00   |
| 0.05                | 2.686 | 0.1809939 | 0.0093239 | 0.60 | 1.30 | 5.280   | 1.641   | 3.00  | 4.00   | 5.00   | 6.00   | 7.00   | 2.880 | 5.492   | 1.685   | 4.00  | 4.00   | 5.00   | 6.00   | 8.00    |
| 0.05                | 2.686 | 0.1809939 | 0.0093239 | 0.50 | 1.30 | 3.763   | 1.034   | 3.00  | 3.00   | 4.00   | 4.00   | 5.00   | 2.880 | 3.904   | 1.066   | 3.00  | 3.00   | 4.00   | 5.00   | 5.00    |
| 0.05                | 2.686 | 0.1809939 | 0.0093239 | 1.10 | 1.40 | 51.186  | 32.062  | 21.00 | 29.00  | 42.00  | 65.00  | 93.00  | 2.880 | 57.717  | 37.101  | 22.00 | 31.00  | 47.00  | 74.00  | 107.00  |
| 0.05                | 2.686 | 0.1809939 | 0.0093239 | 1.20 | 1.40 | 22.620  | 10.047  | 12.00 | 15.00  | 21.00  | 27.00  | 36.00  | 2.880 | 24.283  | 10.850  | 13.00 | 17.00  | 22.00  | 29.00  | 39.00   |
| 0.05                | 2.686 | 0.1809939 | 0.0093239 | 1.30 | 1.40 | 14.327  | 4.825   | 9.00  | 11.00  | 14.00  | 17.00  | 21.00  | 2.880 | 15.165  | 5.013   | 10.00 | 12.00  | 14.00  | 18.00  | 22.00   |
| 0.05                | 2.686 | 0.1809939 | 0.0093239 | 1.40 | 1.40 | 10.794  | 3.002   | 7.00  | 9.00   | 10.00  | 12.00  | 15.00  | 2.880 | 11.358  | 3.078   | 8.00  | 9.00   | 11.00  | 13.00  | 15.00   |
| 0.05                | 2.686 | 0.1809939 | 0.0093239 | 0.90 | 1.40 | 38.924  | 24.132  | 15.00 | 22.00  | 33.00  | 50.00  | 71.00  | 2.880 | 42.938  | 26.690  | 17.00 | 24.00  | 37.00  | 54.00  | 77.00   |
| 0.05                | 2.686 | 0.1809939 | 0.0093239 | 0.80 | 1.40 | 14.763  | 6.697   | 7.00  | 10.00  | 13.00  | 18.00  | 24.00  | 2.880 | 15.418  | 6.853   | 8.00  | 10.00  | 14.00  | 19.00  | 24.00   |
| 0.05                | 2.686 | 0.1809939 | 0.0093239 | 0.70 | 1.40 | 8.123   | 2.987   | 5.00  | 6.00   | 8.00   | 10.00  | 12.00  | 2.880 | 8.492   | 3.050   | 5.00  | 6.00   | 8.00   | 10.00  | 12.00   |
| 0.05                | 2.686 | 0.1809939 | 0.0093239 | 0.60 | 1.40 | 5.244   | 1.623   | 3.00  | 4.00   | 5.00   | 6.00   | 7.00   | 2.880 | 5.522   | 1.693   | 4.00  | 4.00   | 5.00   | 6.00   | 8.00    |
| 0.05                | 2.686 | 0.1809939 | 0.0093239 | 0.50 | 1.40 | 3.728   | 1.047   | 3.00  | 3.00   | 4.00   | 4.00   | 5.00   | 2.880 | 3.897   | 1.052   | 3.00  | 3.00   | 4.00   | 4.00   | 5.00    |
| 0.05                | 2.686 | 0.1809939 | 0.0093239 | 1.10 | 0.90 | 57.731  | 40.053  | 20.00 | 30.00  | 47.00  | 74.00  | 110.00 | 2.880 | 65.229  | 46.157  | 22.00 | 33.00  | 53.00  | 83.00  | 125.00  |
| 0.05                | 2.686 | 0.1809939 | 0.0093239 | 1.20 | 0.90 | 22.731  | 10.324  | 12.00 | 15.00  | 20.00  | 28.00  | 37.00  | 2.880 | 24.509  | 11.166  | 13.00 | 16.00  | 22.00  | 30.00  | 39.00   |
| 0.05                | 2.686 | 0.1809939 | 0.0093239 | 1.30 | 0.90 | 14.377  | 4.783   | 9.00  | 11.00  | 14.00  | 17.00  | 21.00  | 2.880 | 15.200  | 5.183   | 10.00 | 12.00  | 14.00  | 18.00  | 22.00   |
| 0.05                | 2.686 | 0.1809939 | 0.0093239 | 1.40 | 0.90 | 10.794  | 2.963   | 7.00  | 9.00   | 10.00  | 12.00  | 15.00  | 2.880 | 11.368  | 3.094   | 8.00  | 9.00   | 11.00  | 13.00  | 15.00   |
| 0.05                | 2.686 | 0.1809939 | 0.0093239 | 0.90 | 0.90 | 41.449  | 27.404  | 15.00 | 22.00  | 34.00  | 53.00  | 78.00  | 2.880 | 46.41   |         |       |        |        |        |         |

|      |       |           |             |      |      |         |         |       |        |        |        |        |       |         |         |       |        |        |        |         |
|------|-------|-----------|-------------|------|------|---------|---------|-------|--------|--------|--------|--------|-------|---------|---------|-------|--------|--------|--------|---------|
| 0.05 | 2.686 | 0.1809939 | 0.0093239   | 0.50 | 0.90 | 3.732   | 1.039   | 3.00  | 3.00   | 4.00   | 4.00   | 5.00   | 2.880 | 3.895   | 1.081   | 3.00  | 3.00   | 4.00   | 5.00   | 5.00    |
| 0.05 | 2.686 | 0.1809939 | 0.0093239   | 1.10 | 0.80 | 50.226  | 33.434  | 18.00 | 27.00  | 41.00  | 64.00  | 93.00  | 2.880 | 56.671  | 38.318  | 20.00 | 30.00  | 46.00  | 72.00  | 107.00  |
| 0.05 | 2.686 | 0.1809939 | 0.0093239   | 1.20 | 0.80 | 22.366  | 10.198  | 12.00 | 15.00  | 20.00  | 27.00  | 36.00  | 2.880 | 24.095  | 10.728  | 13.00 | 16.00  | 22.00  | 29.00  | 38.00   |
| 0.05 | 2.686 | 0.1809939 | 0.0093239   | 1.30 | 0.80 | 14.291  | 4.848   | 9.00  | 11.00  | 13.00  | 17.00  | 21.00  | 2.880 | 15.153  | 5.075   | 10.00 | 12.00  | 14.00  | 18.00  | 22.00   |
| 0.05 | 2.686 | 0.1809939 | 0.0093239   | 1.40 | 0.80 | 10.798  | 2.971   | 7.00  | 9.00   | 10.00  | 12.00  | 15.00  | 2.880 | 11.306  | 3.047   | 8.00  | 9.00   | 11.00  | 13.00  | 15.00   |
| 0.05 | 2.686 | 0.1809939 | 0.0093239   | 0.90 | 0.80 | 38.870  | 25.184  | 14.00 | 21.00  | 32.00  | 49.00  | 72.00  | 2.880 | 42.089  | 27.924  | 16.00 | 22.00  | 34.00  | 54.00  | 78.00   |
| 0.05 | 2.686 | 0.1809939 | 0.0093239   | 0.80 | 0.80 | 14.525  | 6.598   | 8.00  | 10.00  | 13.00  | 18.00  | 23.00  | 2.880 | 15.460  | 7.118   | 8.00  | 10.00  | 14.00  | 19.00  | 25.00   |
| 0.05 | 2.686 | 0.1809939 | 0.0093239   | 0.70 | 0.80 | 8.098   | 2.916   | 5.00  | 6.00   | 8.00   | 10.00  | 12.00  | 2.880 | 8.458   | 3.064   | 5.00  | 6.00   | 8.00   | 10.00  | 12.00   |
| 0.05 | 2.686 | 0.1809939 | 0.0093239   | 0.60 | 0.80 | 5.277   | 1.640   | 3.00  | 4.00   | 5.00   | 6.00   | 7.00   | 2.880 | 5.518   | 1.714   | 4.00  | 4.00   | 5.00   | 6.00   | 8.00    |
| 0.05 | 2.686 | 0.1809939 | 0.0093239   | 0.50 | 0.80 | 3.745   | 1.056   | 3.00  | 3.00   | 4.00   | 4.00   | 5.00   | 2.880 | 3.885   | 1.065   | 3.00  | 3.00   | 4.00   | 5.00   | 5.00    |
| 0.05 | 2.686 | 0.1809939 | 0.0093239   | 1.10 | 0.70 | 39.306  | 23.457  | 16.00 | 23.00  | 34.00  | 50.00  | 70.00  | 2.880 | 43.320  | 26.796  | 18.00 | 25.00  | 37.00  | 54.00  | 77.00   |
| 0.05 | 2.686 | 0.1809939 | 0.0093239   | 1.20 | 0.70 | 21.261  | 9.170   | 12.00 | 15.00  | 19.00  | 26.00  | 34.00  | 2.880 | 22.994  | 9.734   | 13.00 | 16.00  | 21.00  | 28.00  | 36.00   |
| 0.05 | 2.686 | 0.1809939 | 0.0093239   | 1.30 | 0.70 | 14.168  | 4.665   | 9.00  | 11.00  | 13.00  | 17.00  | 20.00  | 2.880 | 14.981  | 4.980   | 9.00  | 11.00  | 14.00  | 18.00  | 22.00   |
| 0.05 | 2.686 | 0.1809939 | 0.0093239   | 1.40 | 0.70 | 10.736  | 2.946   | 7.00  | 9.00   | 10.00  | 12.00  | 15.00  | 2.880 | 11.298  | 3.071   | 8.00  | 9.00   | 11.00  | 13.00  | 15.00   |
| 0.05 | 2.686 | 0.1809939 | 0.0093239   | 0.90 | 0.70 | 32.372  | 19.240  | 13.00 | 19.00  | 28.00  | 41.00  | 57.00  | 2.880 | 35.431  | 21.028  | 14.90 | 20.00  | 30.00  | 45.00  | 63.00   |
| 0.05 | 2.686 | 0.1809939 | 0.0093239   | 0.80 | 0.70 | 14.237  | 6.339   | 7.00  | 10.00  | 13.00  | 17.00  | 23.00  | 2.880 | 15.134  | 6.748   | 8.00  | 10.00  | 14.00  | 18.00  | 24.00   |
| 0.05 | 2.686 | 0.1809939 | 0.0093239   | 0.70 | 0.70 | 8.046   | 2.891   | 5.00  | 6.00   | 8.00   | 10.00  | 12.00  | 2.880 | 8.491   | 3.015   | 5.00  | 6.00   | 8.00   | 10.00  | 13.00   |
| 0.05 | 2.686 | 0.1809939 | 0.0093239   | 0.60 | 0.70 | 5.260   | 1.622   | 3.00  | 4.00   | 5.00   | 6.00   | 7.00   | 2.880 | 5.495   | 1.675   | 4.00  | 4.00   | 5.00   | 6.00   | 8.00    |
| 0.05 | 2.686 | 0.1809939 | 0.0093239   | 0.50 | 0.70 | 3.741   | 1.048   | 3.00  | 3.00   | 4.00   | 4.00   | 5.00   | 2.880 | 3.888   | 1.063   | 3.00  | 3.00   | 4.00   | 4.00   | 5.00    |
| 0.05 | 2.686 | 0.1809939 | 0.0093239   | 1.10 | 0.60 | 27.366  | 13.979  | 13.00 | 17.00  | 24.00  | 34.00  | 46.00  | 2.880 | 29.560  | 15.236  | 14.00 | 19.00  | 26.00  | 37.00  | 50.00   |
| 0.05 | 2.686 | 0.1809939 | 0.0093239   | 1.20 | 0.60 | 19.195  | 7.586   | 11.00 | 14.00  | 18.00  | 23.00  | 29.00  | 2.880 | 20.679  | 8.296   | 12.00 | 15.00  | 19.00  | 25.00  | 32.00   |
| 0.05 | 2.686 | 0.1809939 | 0.0093239   | 1.30 | 0.60 | 13.711  | 4.385   | 9.00  | 11.00  | 13.00  | 16.00  | 20.00  | 2.880 | 14.540  | 4.655   | 9.00  | 11.00  | 14.00  | 17.00  | 21.00   |
| 0.05 | 2.686 | 0.1809939 | 0.0093239   | 1.40 | 0.60 | 10.568  | 2.840   | 7.00  | 9.00   | 10.00  | 12.00  | 14.00  | 2.880 | 11.229  | 3.017   | 8.00  | 9.00   | 11.00  | 13.00  | 15.00   |
| 0.05 | 2.686 | 0.1809939 | 0.0093239   | 0.90 | 0.60 | 24.443  | 12.398  | 12.00 | 16.00  | 22.00  | 30.00  | 41.00  | 2.880 | 26.845  | 13.819  | 13.00 | 17.00  | 24.00  | 33.00  | 45.00   |
| 0.05 | 2.686 | 0.1809939 | 0.0093239   | 0.80 | 0.60 | 13.746  | 5.695   | 7.00  | 10.00  | 13.00  | 17.00  | 21.00  | 2.880 | 14.488  | 5.930   | 8.00  | 10.00  | 13.00  | 18.00  | 22.00   |
| 0.05 | 2.686 | 0.1809939 | 0.0093239   | 0.70 | 0.60 | 8.036   | 2.868   | 5.00  | 6.00   | 8.00   | 10.00  | 12.00  | 2.880 | 8.416   | 2.983   | 5.00  | 6.00   | 8.00   | 10.00  | 12.00   |
| 0.05 | 2.686 | 0.1809939 | 0.0093239   | 0.60 | 0.60 | 5.263   | 1.618   | 3.00  | 4.00   | 5.00   | 6.00   | 7.00   | 2.880 | 5.503   | 1.689   | 4.00  | 4.00   | 5.00   | 6.00   | 8.00    |
| 0.05 | 2.686 | 0.1809939 | 0.0093239   | 0.50 | 0.60 | 3.758   | 1.042   | 3.00  | 3.00   | 4.00   | 4.00   | 5.00   | 2.880 | 3.886   | 1.058   | 3.00  | 3.00   | 4.00   | 4.00   | 5.00    |
| 0.05 | 2.686 | 0.1809939 | 0.0093239   | 1.10 | 0.50 | 18.614  | 7.872   | 10.00 | 13.00  | 17.00  | 22.00  | 29.00  | 2.880 | 20.157  | 8.559   | 11.00 | 14.00  | 18.00  | 24.00  | 32.00   |
| 0.05 | 2.686 | 0.1809939 | 0.0093239   | 1.20 | 0.50 | 15.941  | 5.665   | 10.00 | 12.00  | 15.00  | 19.00  | 23.00  | 2.880 | 17.219  | 6.279   | 10.00 | 13.00  | 16.00  | 21.00  | 25.00   |
| 0.05 | 2.686 | 0.1809939 | 0.0093239   | 1.30 | 0.50 | 12.807  | 3.792   | 9.00  | 10.00  | 12.00  | 15.00  | 18.00  | 2.880 | 13.615  | 4.032   | 9.00  | 11.00  | 13.00  | 16.00  | 19.00   |
| 0.05 | 2.686 | 0.1809939 | 0.0093239   | 1.40 | 0.50 | 10.371  | 2.680   | 7.00  | 8.00   | 10.00  | 12.00  | 14.00  | 2.880 | 10.967  | 2.798   | 8.00  | 9.00   | 11.00  | 13.00  | 15.00   |
| 0.05 | 2.686 | 0.1809939 | 0.0093239   | 0.90 | 0.50 | 17.735  | 7.392   | 10.00 | 12.00  | 16.00  | 21.00  | 27.00  | 2.880 | 19.186  | 7.918   | 11.00 | 13.00  | 18.00  | 23.00  | 30.00   |
| 0.05 | 2.686 | 0.1809939 | 0.0093239   | 0.80 | 0.50 | 12.547  | 4.642   | 7.00  | 9.00   | 12.00  | 15.00  | 19.00  | 2.880 | 13.250  | 4.909   | 8.00  | 10.00  | 12.00  | 16.00  | 20.00   |
| 0.05 | 2.686 | 0.1809939 | 0.0093239   | 0.70 | 0.50 | 7.957   | 2.742   | 5.00  | 6.00   | 8.00   | 10.00  | 12.00  | 2.880 | 8.334   | 2.837   | 5.00  | 6.00   | 8.00   | 10.00  | 12.00   |
| 0.05 | 2.686 | 0.1809939 | 0.0093239   | 0.60 | 0.50 | 5.262   | 1.628   | 3.00  | 4.00   | 5.00   | 6.00   | 7.00   | 2.880 | 5.480   | 1.638   | 4.00  | 4.00   | 5.00   | 6.00   | 8.00    |
| 0.05 | 2.686 | 0.1809939 | 0.0093239   | 0.50 | 0.50 | 3.732   | 1.041   | 3.00  | 3.00   | 4.00   | 4.00   | 5.00   | 2.880 | 3.888   | 1.069   | 3.00  | 3.00   | 4.00   | 4.00   | 5.00    |
| 0.10 | 3.015 | 0.2595725 | 0.0188190   | 1.00 | 1.00 | 370.849 | 364.131 | 46.00 | 114.00 | 260.00 | 510.00 | 851.10 | 3.204 | 499.684 | 497.469 | 59.00 | 149.00 | 349.50 | 689.25 | 1147.00 |
| 0.10 | 3.015 | 0.2595725 | 0.0188190   | 1.10 | 1.10 | 88.397  | 75.057  | 21.00 | 35.00  | 65.00  | 118.00 | 187.00 | 3.204 | 110.044 | 96.510  | 23.00 | 42.00  | 81.00  | 148.00 | 233.00  |
| 0.10 | 3.015 | 0.2595725 | 0.0188190   | 1.20 | 1.10 | 25.204  | 15.363  | 11.00 | 14.00  | 21.00  | 32.00  | 45.00  | 3.204 | 27.663  | 17.162  | 11.00 | 16.00  | 23.00  | 35.00  | 50.00   |
| 0.10 | 3.015 | 0.2595725 | 0.0188190   | 1.30 | 1.10 | 13.717  | 6.147   | 7.00  | 9.00   | 12.00  | 17.00  | 22.00  | 3.204 | 14.793  | 6.574   | 8.00  | 10.00  | 13.00  | 18.00  | 23.00   |
| 0.10 | 3.015 | 0.2595725 | 0.0188190   | 1.40 | 1.10 | 9.698   | 3.402   | 6.00  | 7.00   | 9.00   | 11.00  | 14.00  | 3.204 | 10.283  | 3.665   | 6.00  | 8.00   | 10.00  | 12.00  | 15.00   |
| 0.10 | 3.015 | 0.2595725 | 0.0188190   | 0.90 | 1.10 | 48.630  | 39.163  | 12.00 | 21.00  | 37.00  | 65.00  | 101.00 | 3.204 | 54.666  | 45.053  | 14.00 | 23.00  | 41.00  | 72.00  | 114.00  |
| 0.10 | 3.015 | 0.2595725 | 0.0188190   | 0.80 | 1.10 | 13.635  | 7.760   | 6.00  | 8.00   | 12.00  | 17.00  | 24.00  | 3.204 | 14.529  | 8.256   | 6.00  | 9.00   | 13.00  | 18.00  | 25.00   |
| 0.10 | 3.015 | 0.2595725 | 0.0188190   | 0.70 | 1.10 | 6.960   | 3.067   | 4.00  | 5.00   | 6.00   | 8.00   | 11.00  | 3.204 | 7.230   | 3.103   | 4.00  | 5.00   | 7.00   | 9.00   | 11.00   |
| 0.10 | 3.015 | 0.2595725 | 0.0188190   | 0.60 | 1.10 | 4.399   | 1.610   | 3.00  | 3.00   | 4.00   | 5.00   | 7.00   | 3.204 | 4.563   | 1.647   | 3.00  | 3.00   | 4.00   | 5.00   | 7.00    |
| 0.10 | 3.015 | 0.2595725 | 0.0188190   | 0.50 | 1.10 | 3.054   | 0.969   | 2.00  | 2.00   | 3.00   | 4.00   | 4.00   | 3.204 | 3.177   | 1.004   | 2.00  | 2.00   | 3.00   | 4.00   | 4.00    |
| 0.10 | 3.015 | 0.2595725 | 0.0188190   | 1.10 | 1.20 | 89.536  | 77.180  | 20.00 | 35.00  | 66.00  | 120.00 | 189.00 | 3.204 | 107.948 | 94.391  | 23.00 | 41.00  | 79.00  | 144.00 | 233.00  |
| 0.10 | 3.015 | 0.2595725 | 0.0188190   | 1.20 | 1.20 | 24.972  | 15.302  | 10.00 | 14.00  | 21.00  | 31.00  | 45.00  | 3.204 | 27.887  | 17.457  | 11.00 | 16.00  | 23.00  | 35.00  | 50.00   |
| 0.10 | 3.015 | 0.2595725 | 0.0188190   | 1.30 | 1.20 | 13.737  | 6.036   | 7.00  | 9.00   | 12.00  | 17.00  | 22.00  | 3.204 | 14.718  | 6.512   | 8.00  | 10.00  | 13.00  | 18.00  | 23.00   |
| 0.10 | 3.015 | 0.2595725 | 0.0188190   | 1.40 | 1.20 | 9.736   | 3.532   | 6.00  | 7.00   | 9.00   | 11.00  | 14.00  | 3.204 | 10.358  | 3.689   | 6.00  | 8.00   | 10.00  | 12.00  | 15.00   |
| 0.10 | 3.015 | 0.2595725 | 0.0188190   | 0.90 | 1.20 | 47.545  | 38.722  | 12.00 | 20.00  | 36.00  | 63.00  | 98.00  | 3.204 | 54.559  | 44.531  | 14.00 | 23.00  | 42.00  | 73.00  | 113.00  |
| 0.10 | 3.015 | 0.2595725 | 0.0188190   | 0.80 | 1.20 | 13.569  | 7.727   | 6.00  | 8.00   | 12.00  | 17.00  | 24.00  | 3.204 | 14.494  | 8.175   | 6.00  | 9.00   | 13.00  | 18.00  | 25.00   |
| 0.10 | 3.015 | 0.2595725 | 0.0188190   | 0.70 | 1.20 | 6.895   | 2.924   | 4.00  | 5.00   | 6.00   | 8.00   | 11.00  | 3.204 | 7.249   | 3.156   | 4.00  | 5.00   | 7.00   | 9.00   | 11.00   |
| 0.10 | 3.015 | 0.2595725 | 0.0188190   | 0.60 | 1.20 | 4.376   | 1.606   | 3.00  | 3.00   | 4.00   | 5.00   | 6.00   | 3.204 | 4.558   | 1.628   | 3.00  | 3.00   | 4.00   | 5.00   | 7.00    |
| 0.10 | 3.015 | 0.2595725 | 0.0188190   | 0.50 | 1.20 | 3.056   | 0.972   | 2.00  | 2.00   | 3.00   | 4.00   | 4.00   | 3.204 | 3.185   | 1.007   | 2.00  | 2.00   | 3.00   | 4.00   | 4.00    |
| 0.10 | 3.015 | 0.2595725 | 0.0188190</ |      |      |         |         |       |        |        |        |        |       |         |         |       |        |        |        |         |

|      |       |           |           |      |      |        |        |       |       |       |        |        |       |         |        |       |       |       |        |        |
|------|-------|-----------|-----------|------|------|--------|--------|-------|-------|-------|--------|--------|-------|---------|--------|-------|-------|-------|--------|--------|
| 0.10 | 3.015 | 0.2595725 | 0.0188190 | 0.70 | 1.30 | 6.928  | 3.028  | 4.00  | 5.00  | 6.00  | 8.00   | 11.00  | 3.204 | 7.221   | 3.090  | 4.00  | 5.00  | 7.00  | 9.00   | 11.00  |
| 0.10 | 3.015 | 0.2595725 | 0.0188190 | 0.60 | 1.30 | 4.362  | 1.577  | 3.00  | 3.00  | 4.00  | 5.00   | 6.00   | 3.204 | 4.546   | 1.638  | 3.00  | 3.00  | 4.00  | 5.00   | 7.00   |
| 0.10 | 3.015 | 0.2595725 | 0.0188190 | 0.50 | 1.30 | 3.055  | 0.976  | 2.00  | 2.00  | 3.00  | 4.00   | 4.00   | 3.204 | 3.157   | 0.994  | 2.00  | 2.00  | 3.00  | 4.00   | 4.00   |
| 0.10 | 3.015 | 0.2595725 | 0.0188190 | 1.10 | 1.40 | 79.710 | 66.871 | 20.00 | 33.00 | 60.00 | 105.00 | 165.00 | 3.204 | 100.941 | 86.390 | 23.00 | 39.00 | 75.00 | 136.00 | 216.00 |
| 0.10 | 3.015 | 0.2595725 | 0.0188190 | 1.20 | 1.40 | 24.773 | 14.598 | 10.00 | 14.00 | 21.00 | 31.00  | 44.00  | 3.204 | 27.517  | 17.265 | 11.00 | 15.00 | 23.00 | 35.00  | 50.00  |
| 0.10 | 3.015 | 0.2595725 | 0.0188190 | 1.30 | 1.40 | 13.715 | 6.059  | 7.00  | 9.00  | 12.00 | 17.00  | 21.00  | 3.204 | 14.742  | 6.621  | 8.00  | 10.00 | 13.00 | 18.00  | 23.00  |
| 0.10 | 3.015 | 0.2595725 | 0.0188190 | 1.40 | 1.40 | 9.711  | 3.425  | 6.00  | 7.00  | 9.00  | 11.00  | 14.00  | 3.204 | 10.195  | 3.596  | 6.00  | 8.00  | 10.00 | 12.00  | 15.00  |
| 0.10 | 3.015 | 0.2595725 | 0.0188190 | 0.90 | 1.40 | 45.794 | 36.017 | 12.00 | 20.00 | 36.00 | 60.00  | 94.00  | 3.204 | 53.431  | 43.392 | 14.00 | 23.00 | 41.00 | 70.00  | 109.00 |
| 0.10 | 3.015 | 0.2595725 | 0.0188190 | 0.80 | 1.40 | 13.564 | 7.676  | 6.00  | 8.00  | 12.00 | 17.00  | 24.00  | 3.204 | 14.577  | 8.293  | 6.00  | 9.00  | 13.00 | 18.00  | 25.00  |
| 0.10 | 3.015 | 0.2595725 | 0.0188190 | 0.70 | 1.40 | 6.861  | 2.965  | 4.00  | 5.00  | 6.00  | 8.00   | 11.00  | 3.204 | 7.260   | 3.182  | 4.00  | 5.00  | 7.00  | 9.00   | 11.00  |
| 0.10 | 3.015 | 0.2595725 | 0.0188190 | 0.60 | 1.40 | 4.372  | 1.598  | 3.00  | 3.00  | 4.00  | 5.00   | 6.00   | 3.204 | 4.546   | 1.605  | 3.00  | 3.00  | 4.00  | 5.00   | 7.00   |
| 0.10 | 3.015 | 0.2595725 | 0.0188190 | 0.50 | 1.40 | 3.082  | 0.990  | 2.00  | 2.00  | 3.00  | 4.00   | 4.00   | 3.204 | 3.182   | 1.011  | 2.00  | 2.00  | 3.00  | 4.00   | 4.00   |
| 0.10 | 3.015 | 0.2595725 | 0.0188190 | 1.10 | 0.90 | 77.048 | 65.305 | 18.00 | 31.00 | 58.00 | 102.00 | 163.00 | 3.204 | 93.912  | 81.801 | 21.00 | 36.00 | 69.00 | 126.00 | 201.00 |
| 0.10 | 3.015 | 0.2595725 | 0.0188190 | 1.20 | 0.90 | 24.526 | 15.195 | 10.00 | 14.00 | 21.00 | 31.00  | 44.00  | 3.204 | 27.326  | 16.776 | 11.00 | 15.00 | 23.00 | 34.00  | 50.00  |
| 0.10 | 3.015 | 0.2595725 | 0.0188190 | 1.30 | 0.90 | 13.701 | 6.035  | 7.00  | 9.00  | 12.00 | 17.00  | 22.00  | 3.204 | 14.614  | 6.525  | 8.00  | 10.00 | 13.00 | 18.00  | 23.00  |
| 0.10 | 3.015 | 0.2595725 | 0.0188190 | 1.40 | 0.90 | 9.729  | 3.408  | 6.00  | 7.00  | 9.00  | 11.00  | 14.00  | 3.204 | 10.263  | 3.687  | 6.00  | 8.00  | 10.00 | 12.00  | 15.00  |
| 0.10 | 3.015 | 0.2595725 | 0.0188190 | 0.90 | 0.90 | 45.227 | 36.735 | 12.00 | 20.00 | 34.00 | 60.00  | 92.00  | 3.204 | 50.663  | 41.443 | 13.00 | 22.00 | 39.00 | 67.00  | 104.00 |
| 0.10 | 3.015 | 0.2595725 | 0.0188190 | 0.80 | 0.90 | 13.495 | 7.543  | 6.00  | 8.00  | 12.00 | 17.00  | 24.00  | 3.204 | 14.389  | 8.234  | 6.00  | 9.00  | 12.00 | 18.00  | 25.00  |
| 0.10 | 3.015 | 0.2595725 | 0.0188190 | 0.70 | 0.90 | 6.877  | 3.041  | 4.00  | 5.00  | 6.00  | 8.00   | 11.00  | 3.204 | 7.215   | 3.146  | 4.00  | 5.00  | 7.00  | 9.00   | 11.00  |
| 0.10 | 3.015 | 0.2595725 | 0.0188190 | 0.60 | 0.90 | 4.349  | 1.566  | 3.00  | 3.00  | 4.00  | 5.00   | 6.00   | 3.204 | 4.524   | 1.618  | 3.00  | 3.00  | 4.00  | 5.00   | 7.00   |
| 0.10 | 3.015 | 0.2595725 | 0.0188190 | 0.50 | 0.90 | 3.087  | 0.984  | 2.00  | 2.00  | 3.00  | 4.00   | 4.00   | 3.204 | 3.179   | 1.022  | 2.00  | 2.00  | 3.00  | 4.00   | 5.00   |
| 0.10 | 3.015 | 0.2595725 | 0.0188190 | 1.10 | 0.80 | 63.269 | 52.048 | 16.00 | 27.00 | 48.00 | 83.00  | 130.10 | 3.204 | 76.424  | 64.110 | 18.00 | 31.00 | 57.00 | 102.00 | 161.00 |
| 0.10 | 3.015 | 0.2595725 | 0.0188190 | 1.20 | 0.80 | 23.499 | 13.849 | 10.00 | 14.00 | 20.00 | 29.25  | 41.00  | 3.204 | 26.359  | 15.913 | 11.00 | 15.00 | 22.00 | 33.00  | 47.00  |
| 0.10 | 3.015 | 0.2595725 | 0.0188190 | 1.30 | 0.80 | 13.572 | 6.019  | 7.00  | 9.00  | 12.00 | 17.00  | 21.00  | 3.204 | 14.511  | 6.410  | 8.00  | 10.00 | 13.00 | 18.00  | 23.00  |
| 0.10 | 3.015 | 0.2595725 | 0.0188190 | 1.40 | 0.80 | 9.670  | 3.408  | 6.00  | 7.00  | 9.00  | 11.00  | 14.00  | 3.204 | 10.246  | 3.619  | 6.00  | 8.00  | 10.00 | 12.00  | 15.00  |
| 0.10 | 3.015 | 0.2595725 | 0.0188190 | 0.90 | 0.80 | 40.230 | 31.059 | 12.00 | 18.00 | 31.00 | 53.00  | 79.10  | 3.204 | 45.851  | 36.874 | 13.00 | 20.00 | 35.00 | 60.00  | 93.00  |
| 0.10 | 3.015 | 0.2595725 | 0.0188190 | 0.80 | 0.80 | 13.226 | 7.439  | 6.00  | 8.00  | 12.00 | 16.00  | 23.00  | 3.204 | 14.172  | 7.895  | 6.00  | 9.00  | 12.00 | 18.00  | 24.00  |
| 0.10 | 3.015 | 0.2595725 | 0.0188190 | 0.70 | 0.80 | 6.931  | 2.996  | 4.00  | 5.00  | 6.00  | 8.00   | 11.00  | 3.204 | 7.161   | 3.123  | 4.00  | 5.00  | 7.00  | 9.00   | 11.00  |
| 0.10 | 3.015 | 0.2595725 | 0.0188190 | 0.60 | 0.80 | 4.372  | 1.608  | 3.00  | 3.00  | 4.00  | 5.00   | 6.00   | 3.204 | 4.516   | 1.622  | 3.00  | 3.00  | 4.00  | 5.00   | 7.00   |
| 0.10 | 3.015 | 0.2595725 | 0.0188190 | 0.50 | 0.80 | 3.082  | 0.982  | 2.00  | 2.00  | 3.00  | 4.00   | 4.00   | 3.204 | 3.198   | 1.007  | 2.00  | 3.00  | 3.00  | 4.00   | 4.00   |
| 0.10 | 3.015 | 0.2595725 | 0.0188190 | 1.10 | 0.70 | 45.571 | 34.595 | 13.00 | 21.00 | 36.00 | 60.00  | 91.00  | 3.204 | 53.869  | 42.452 | 15.00 | 24.00 | 42.00 | 71.00  | 108.00 |
| 0.10 | 3.015 | 0.2595725 | 0.0188190 | 1.20 | 0.70 | 21.888 | 12.487 | 10.00 | 13.00 | 19.00 | 27.00  | 38.00  | 3.204 | 24.539  | 14.473 | 10.00 | 14.00 | 21.00 | 31.00  | 43.00  |
| 0.10 | 3.015 | 0.2595725 | 0.0188190 | 1.30 | 0.70 | 13.284 | 5.763  | 7.00  | 9.00  | 12.00 | 16.00  | 21.00  | 3.204 | 14.251  | 6.206  | 8.00  | 10.00 | 13.00 | 17.00  | 22.00  |
| 0.10 | 3.015 | 0.2595725 | 0.0188190 | 1.40 | 0.70 | 9.683  | 3.375  | 6.00  | 7.00  | 9.00  | 11.00  | 14.00  | 3.204 | 10.226  | 3.571  | 6.00  | 8.00  | 10.00 | 12.00  | 15.00  |
| 0.10 | 3.015 | 0.2595725 | 0.0188190 | 0.90 | 0.70 | 33.401 | 24.298 | 10.00 | 16.00 | 27.00 | 44.00  | 65.00  | 3.204 | 37.558  | 27.833 | 11.00 | 18.00 | 29.00 | 49.00  | 75.00  |
| 0.10 | 3.015 | 0.2595725 | 0.0188190 | 0.80 | 0.70 | 12.939 | 6.965  | 6.00  | 8.00  | 11.00 | 16.00  | 22.00  | 3.204 | 13.908  | 7.628  | 6.00  | 8.00  | 12.00 | 17.00  | 24.00  |
| 0.10 | 3.015 | 0.2595725 | 0.0188190 | 0.70 | 0.70 | 6.931  | 3.009  | 4.00  | 5.00  | 6.00  | 8.00   | 11.00  | 3.204 | 7.207   | 3.018  | 4.00  | 5.00  | 7.00  | 9.00   | 11.00  |
| 0.10 | 3.015 | 0.2595725 | 0.0188190 | 0.60 | 0.70 | 4.404  | 1.622  | 3.00  | 3.00  | 4.00  | 5.00   | 6.10   | 3.204 | 4.539   | 1.641  | 3.00  | 3.00  | 4.00  | 5.00   | 7.00   |
| 0.10 | 3.015 | 0.2595725 | 0.0188190 | 0.50 | 0.70 | 3.078  | 0.995  | 2.00  | 2.00  | 3.00  | 4.00   | 4.00   | 3.204 | 3.168   | 1.005  | 2.00  | 2.00  | 3.00  | 4.00   | 4.00   |
| 0.10 | 3.015 | 0.2595725 | 0.0188190 | 1.10 | 0.60 | 29.355 | 19.969 | 11.00 | 15.00 | 24.00 | 37.00  | 55.00  | 3.204 | 33.093  | 22.427 | 12.00 | 17.00 | 27.00 | 43.00  | 63.00  |
| 0.10 | 3.015 | 0.2595725 | 0.0188190 | 1.20 | 0.60 | 19.184 | 10.021 | 9.00  | 12.00 | 17.00 | 24.00  | 32.00  | 3.204 | 21.104  | 11.555 | 10.00 | 13.00 | 18.00 | 26.00  | 36.00  |
| 0.10 | 3.015 | 0.2595725 | 0.0188190 | 1.30 | 0.60 | 12.697 | 5.226  | 7.00  | 9.00  | 12.00 | 15.00  | 19.00  | 3.204 | 13.700  | 5.745  | 8.00  | 10.00 | 13.00 | 16.00  | 21.00  |
| 0.10 | 3.015 | 0.2595725 | 0.0188190 | 1.40 | 0.60 | 9.454  | 3.239  | 6.00  | 7.00  | 9.00  | 11.00  | 14.00  | 3.204 | 10.053  | 3.463  | 6.00  | 8.00  | 9.00  | 12.00  | 15.00  |
| 0.10 | 3.015 | 0.2595725 | 0.0188190 | 0.90 | 0.60 | 24.785 | 16.217 | 9.00  | 13.00 | 21.00 | 32.00  | 46.00  | 3.204 | 27.698  | 18.238 | 10.00 | 15.00 | 23.00 | 35.00  | 52.00  |
| 0.10 | 3.015 | 0.2595725 | 0.0188190 | 0.80 | 0.60 | 12.377 | 6.486  | 6.00  | 8.00  | 11.00 | 15.00  | 21.00  | 3.204 | 13.061  | 6.777  | 6.00  | 8.00  | 12.00 | 16.00  | 22.00  |
| 0.10 | 3.015 | 0.2595725 | 0.0188190 | 0.70 | 0.60 | 6.835  | 2.917  | 4.00  | 5.00  | 6.00  | 8.00   | 11.00  | 3.204 | 7.149   | 3.030  | 4.00  | 5.00  | 7.00  | 9.00   | 11.00  |
| 0.10 | 3.015 | 0.2595725 | 0.0188190 | 0.60 | 0.60 | 4.402  | 1.593  | 3.00  | 3.00  | 4.00  | 5.00   | 6.00   | 3.204 | 4.542   | 1.629  | 3.00  | 3.00  | 4.00  | 5.00   | 7.00   |
| 0.10 | 3.015 | 0.2595725 | 0.0188190 | 0.50 | 0.60 | 3.087  | 0.999  | 2.00  | 2.00  | 3.00  | 4.00   | 4.00   | 3.204 | 3.181   | 1.003  | 2.00  | 2.00  | 3.00  | 4.00   | 4.00   |
| 0.10 | 3.015 | 0.2595725 | 0.0188190 | 1.10 | 0.50 | 18.493 | 10.215 | 8.00  | 11.00 | 16.00 | 23.00  | 32.00  | 3.204 | 20.364  | 11.121 | 9.00  | 12.00 | 18.00 | 26.00  | 35.00  |
| 0.10 | 3.015 | 0.2595725 | 0.0188190 | 1.20 | 0.50 | 15.211 | 7.034  | 8.00  | 10.00 | 14.00 | 19.00  | 24.00  | 3.204 | 16.596  | 7.911  | 8.00  | 11.00 | 15.00 | 20.00  | 27.00  |
| 0.10 | 3.015 | 0.2595725 | 0.0188190 | 1.30 | 0.50 | 11.626 | 4.439  | 7.00  | 8.00  | 11.00 | 14.00  | 17.00  | 3.204 | 12.587  | 4.816  | 7.00  | 9.00  | 12.00 | 15.00  | 19.00  |
| 0.10 | 3.015 | 0.2595725 | 0.0188190 | 1.40 | 0.50 | 9.155  | 2.993  | 6.00  | 7.00  | 9.00  | 11.00  | 13.00  | 3.204 | 9.693   | 3.202  | 6.00  | 7.00  | 9.00  | 11.00  | 14.00  |
| 0.10 | 3.015 | 0.2595725 | 0.0188190 | 0.90 | 0.50 | 17.103 | 9.257  | 8.00  | 10.00 | 15.00 | 21.00  | 29.00  | 3.204 | 18.606  | 10.276 | 8.00  | 11.00 | 16.00 | 23.00  | 32.00  |
| 0.10 | 3.015 | 0.2595725 | 0.0188190 | 0.80 | 0.50 | 11.176 | 5.222  | 6.00  | 7.00  | 10.00 | 14.00  | 18.00  | 3.204 | 11.917  | 5.649  | 6.00  | 8.00  | 11.00 | 15.00  | 19.00  |
| 0.10 | 3.015 | 0.2595725 | 0.0188190 | 0.70 | 0.50 | 6.677  | 2.707  | 4.00  | 5.00  | 6.00  | 8.00   | 10.00  | 3.204 | 7.046   | 2.852  | 4.00  | 5.00  | 7.00  | 9.00   | 11.00  |
| 0.10 | 3.015 | 0.2595725 | 0.0188190 | 0.60 | 0.50 | 4.373  | 1.572  | 3.00  | 3.00  | 4.00  | 5.00   | 6.00   | 3.204 | 4.540   | 1.618  | 3.00  | 3.00  | 4.00  | 5.00   | 7.00   |
| 0.10 | 3.015 | 0.2595725 | 0.0188190 | 0.50 | 0.50 | 3.076  | 0.980  | 2.00  | 2.00  | 3.00  | 4.00   | 4.00   | 3.204 | 3.178   | 1.008  | 2.00  | 2.00  | 3.    |        |        |

|      |       |           |           |      |      |         |         |       |       |        |        |        |       |         |         |       |       |        |        |        |
|------|-------|-----------|-----------|------|------|---------|---------|-------|-------|--------|--------|--------|-------|---------|---------|-------|-------|--------|--------|--------|
| 0.15 | 3.209 | 0.3224310 | 0.0286744 | 0.90 | 1.10 | 54.046  | 46.992  | 11.00 | 20.00 | 40.00  | 73.00  | 116.00 | 3.387 | 62.871  | 56.983  | 12.00 | 23.00 | 45.00  | 84.00  | 136.00 |
| 0.15 | 3.209 | 0.3224310 | 0.0286744 | 0.80 | 1.10 | 13.772  | 8.907   | 5.00  | 7.00  | 12.00  | 18.00  | 25.00  | 3.387 | 14.603  | 9.604   | 5.00  | 8.00  | 12.00  | 19.00  | 27.00  |
| 0.15 | 3.209 | 0.3224310 | 0.0286744 | 0.70 | 1.10 | 6.468   | 3.201   | 3.00  | 4.00  | 6.00   | 8.00   | 11.00  | 3.387 | 6.811   | 3.407   | 3.00  | 4.00  | 6.00   | 8.00   | 11.00  |
| 0.15 | 3.209 | 0.3224310 | 0.0286744 | 0.60 | 1.10 | 3.980   | 1.597   | 2.00  | 3.00  | 4.00   | 5.00   | 6.00   | 3.387 | 4.148   | 1.662   | 2.00  | 3.00  | 4.00   | 5.00   | 6.00   |
| 0.15 | 3.209 | 0.3224310 | 0.0286744 | 0.50 | 1.10 | 2.769   | 0.964   | 2.00  | 2.00  | 3.00   | 3.00   | 4.00   | 3.387 | 2.845   | 0.986   | 2.00  | 2.00  | 3.00   | 3.00   | 4.00   |
| 0.15 | 3.209 | 0.3224310 | 0.0286744 | 1.10 | 1.20 | 138.764 | 130.264 | 23.00 | 46.00 | 98.00  | 189.00 | 313.00 | 3.387 | 179.279 | 168.543 | 28.00 | 59.00 | 127.00 | 248.00 | 396.00 |
| 0.15 | 3.209 | 0.3224310 | 0.0286744 | 1.20 | 1.20 | 31.809  | 23.395  | 10.00 | 15.00 | 25.00  | 41.00  | 63.00  | 3.387 | 36.415  | 27.245  | 11.00 | 17.00 | 28.00  | 47.00  | 73.00  |
| 0.15 | 3.209 | 0.3224310 | 0.0286744 | 1.30 | 1.20 | 14.917  | 8.356   | 7.00  | 9.00  | 13.00  | 18.00  | 26.00  | 3.387 | 16.461  | 9.436   | 7.00  | 10.00 | 14.00  | 20.00  | 29.00  |
| 0.15 | 3.209 | 0.3224310 | 0.0286744 | 1.40 | 1.20 | 9.852   | 4.243   | 5.00  | 7.00  | 9.00   | 12.00  | 15.00  | 3.387 | 10.483  | 4.529   | 6.00  | 7.00  | 10.00  | 13.00  | 16.00  |
| 0.15 | 3.209 | 0.3224310 | 0.0286744 | 0.90 | 1.20 | 55.503  | 48.720  | 11.00 | 21.00 | 41.00  | 74.00  | 121.00 | 3.387 | 65.031  | 58.138  | 13.00 | 24.00 | 48.00  | 87.00  | 140.00 |
| 0.15 | 3.209 | 0.3224310 | 0.0286744 | 0.80 | 1.20 | 13.698  | 8.997   | 5.00  | 7.00  | 11.00  | 17.00  | 26.00  | 3.387 | 14.797  | 9.758   | 5.00  | 8.00  | 12.00  | 19.00  | 28.00  |
| 0.15 | 3.209 | 0.3224310 | 0.0286744 | 0.70 | 1.20 | 6.536   | 3.123   | 3.00  | 4.00  | 6.00   | 8.00   | 11.00  | 3.387 | 6.857   | 3.317   | 3.00  | 4.00  | 6.00   | 8.00   | 11.00  |
| 0.15 | 3.209 | 0.3224310 | 0.0286744 | 0.60 | 1.20 | 3.998   | 1.618   | 2.00  | 3.00  | 4.00   | 5.00   | 6.00   | 3.387 | 4.153   | 1.644   | 2.00  | 3.00  | 4.00   | 5.00   | 6.00   |
| 0.15 | 3.209 | 0.3224310 | 0.0286744 | 0.50 | 1.20 | 2.766   | 0.971   | 2.00  | 2.00  | 3.00   | 3.00   | 4.00   | 3.387 | 2.848   | 0.996   | 2.00  | 2.00  | 3.00   | 3.00   | 4.00   |
| 0.15 | 3.209 | 0.3224310 | 0.0286744 | 1.10 | 1.30 | 140.045 | 130.061 | 23.00 | 47.00 | 99.00  | 193.00 | 312.00 | 3.387 | 182.383 | 172.658 | 28.00 | 58.00 | 130.00 | 250.00 | 404.00 |
| 0.15 | 3.209 | 0.3224310 | 0.0286744 | 1.20 | 1.30 | 31.592  | 22.910  | 10.00 | 15.00 | 25.00  | 41.00  | 62.00  | 3.387 | 36.410  | 27.751  | 11.00 | 17.00 | 29.00  | 47.00  | 72.00  |
| 0.15 | 3.209 | 0.3224310 | 0.0286744 | 1.30 | 1.30 | 14.976  | 8.261   | 7.00  | 9.00  | 13.00  | 19.00  | 26.00  | 3.387 | 16.310  | 9.158   | 7.00  | 10.00 | 14.00  | 20.00  | 28.00  |
| 0.15 | 3.209 | 0.3224310 | 0.0286744 | 1.40 | 1.30 | 9.853   | 4.178   | 6.00  | 7.00  | 9.00   | 12.00  | 15.00  | 3.387 | 10.498  | 4.666   | 6.00  | 7.00  | 9.00   | 13.00  | 16.00  |
| 0.15 | 3.209 | 0.3224310 | 0.0286744 | 0.90 | 1.30 | 55.513  | 49.498  | 11.00 | 21.00 | 41.00  | 74.00  | 120.00 | 3.387 | 64.069  | 57.275  | 12.00 | 23.00 | 47.00  | 87.00  | 138.00 |
| 0.15 | 3.209 | 0.3224310 | 0.0286744 | 0.80 | 1.30 | 13.636  | 8.900   | 5.00  | 7.00  | 11.00  | 17.00  | 25.00  | 3.387 | 14.686  | 9.567   | 5.00  | 8.00  | 12.00  | 19.00  | 27.00  |
| 0.15 | 3.209 | 0.3224310 | 0.0286744 | 0.70 | 1.30 | 6.506   | 3.196   | 3.00  | 4.00  | 6.00   | 8.00   | 11.00  | 3.387 | 6.872   | 3.327   | 3.00  | 4.00  | 6.00   | 9.00   | 11.00  |
| 0.15 | 3.209 | 0.3224310 | 0.0286744 | 0.60 | 1.30 | 4.021   | 1.633   | 2.00  | 3.00  | 4.00   | 5.00   | 6.00   | 3.387 | 4.147   | 1.666   | 2.00  | 3.00  | 4.00   | 5.00   | 6.00   |
| 0.15 | 3.209 | 0.3224310 | 0.0286744 | 0.50 | 1.30 | 2.788   | 0.984   | 2.00  | 2.00  | 3.00   | 3.00   | 4.00   | 3.387 | 2.868   | 0.979   | 2.00  | 2.00  | 3.00   | 3.00   | 4.00   |
| 0.15 | 3.209 | 0.3224310 | 0.0286744 | 1.10 | 1.40 | 143.567 | 136.260 | 23.00 | 47.00 | 102.00 | 195.00 | 319.00 | 3.387 | 184.311 | 173.504 | 29.00 | 61.00 | 132.00 | 251.00 | 413.00 |
| 0.15 | 3.209 | 0.3224310 | 0.0286744 | 1.20 | 1.40 | 31.444  | 22.854  | 10.00 | 15.00 | 25.00  | 41.00  | 61.00  | 3.387 | 36.609  | 27.568  | 11.00 | 17.00 | 29.00  | 47.00  | 74.00  |
| 0.15 | 3.209 | 0.3224310 | 0.0286744 | 1.30 | 1.40 | 15.081  | 8.453   | 7.00  | 9.00  | 13.00  | 19.00  | 26.00  | 3.387 | 16.381  | 9.137   | 7.00  | 10.00 | 14.00  | 20.00  | 28.00  |
| 0.15 | 3.209 | 0.3224310 | 0.0286744 | 1.40 | 1.40 | 9.817   | 4.205   | 5.00  | 7.00  | 9.00   | 12.00  | 15.00  | 3.387 | 10.572  | 4.637   | 6.00  | 7.00  | 10.00  | 13.00  | 17.00  |
| 0.15 | 3.209 | 0.3224310 | 0.0286744 | 0.90 | 1.40 | 55.922  | 50.180  | 12.00 | 21.00 | 41.00  | 74.00  | 119.00 | 3.387 | 64.406  | 57.234  | 13.00 | 24.00 | 47.00  | 86.00  | 139.00 |
| 0.15 | 3.209 | 0.3224310 | 0.0286744 | 0.80 | 1.40 | 13.795  | 8.905   | 5.00  | 7.00  | 11.00  | 18.00  | 26.00  | 3.387 | 14.722  | 9.581   | 5.00  | 8.00  | 12.00  | 19.00  | 27.00  |
| 0.15 | 3.209 | 0.3224310 | 0.0286744 | 0.70 | 1.40 | 6.573   | 3.236   | 3.00  | 4.00  | 6.00   | 8.00   | 11.00  | 3.387 | 6.807   | 3.355   | 3.00  | 4.00  | 6.00   | 8.00   | 11.00  |
| 0.15 | 3.209 | 0.3224310 | 0.0286744 | 0.60 | 1.40 | 3.995   | 1.599   | 2.00  | 3.00  | 4.00   | 5.00   | 6.00   | 3.387 | 4.148   | 1.658   | 2.00  | 3.00  | 4.00   | 5.00   | 6.00   |
| 0.15 | 3.209 | 0.3224310 | 0.0286744 | 0.50 | 1.40 | 2.780   | 0.971   | 2.00  | 2.00  | 3.00   | 3.00   | 4.00   | 3.387 | 2.858   | 0.987   | 2.00  | 2.00  | 3.00   | 3.00   | 4.00   |
| 0.15 | 3.209 | 0.3224310 | 0.0286744 | 1.10 | 0.90 | 107.390 | 99.300  | 19.00 | 37.75 | 78.00  | 143.00 | 234.00 | 3.387 | 135.513 | 125.102 | 22.00 | 45.00 | 97.00  | 185.00 | 301.10 |
| 0.15 | 3.209 | 0.3224310 | 0.0286744 | 1.20 | 0.90 | 30.086  | 22.352  | 10.00 | 15.00 | 24.00  | 39.00  | 58.00  | 3.387 | 34.786  | 26.232  | 11.00 | 16.00 | 27.00  | 45.00  | 69.00  |
| 0.15 | 3.209 | 0.3224310 | 0.0286744 | 1.30 | 0.90 | 14.926  | 8.212   | 7.00  | 9.00  | 13.00  | 18.00  | 26.00  | 3.387 | 16.282  | 9.095   | 7.00  | 10.00 | 14.00  | 20.00  | 28.00  |
| 0.15 | 3.209 | 0.3224310 | 0.0286744 | 1.40 | 0.90 | 9.803   | 4.176   | 6.00  | 7.00  | 9.00   | 12.00  | 15.00  | 3.387 | 10.426  | 4.491   | 6.00  | 7.00  | 9.00   | 12.00  | 16.00  |
| 0.15 | 3.209 | 0.3224310 | 0.0286744 | 0.90 | 0.90 | 50.229  | 43.233  | 11.00 | 19.00 | 37.00  | 68.00  | 108.00 | 3.387 | 57.827  | 51.516  | 12.00 | 22.00 | 43.00  | 77.00  | 123.00 |
| 0.15 | 3.209 | 0.3224310 | 0.0286744 | 0.80 | 0.90 | 13.494  | 8.690   | 5.00  | 7.00  | 11.00  | 17.00  | 25.00  | 3.387 | 14.525  | 9.442   | 5.00  | 8.00  | 12.00  | 19.00  | 26.00  |
| 0.15 | 3.209 | 0.3224310 | 0.0286744 | 0.70 | 0.90 | 6.510   | 3.170   | 3.00  | 4.00  | 6.00   | 8.00   | 11.00  | 3.387 | 6.845   | 3.327   | 3.00  | 4.00  | 6.00   | 8.00   | 11.00  |
| 0.15 | 3.209 | 0.3224310 | 0.0286744 | 0.60 | 0.90 | 3.994   | 1.618   | 2.00  | 3.00  | 4.00   | 5.00   | 6.00   | 3.387 | 4.117   | 1.646   | 2.00  | 3.00  | 4.00   | 5.00   | 6.00   |
| 0.15 | 3.209 | 0.3224310 | 0.0286744 | 0.50 | 0.90 | 2.755   | 0.968   | 2.00  | 2.00  | 3.00   | 3.00   | 4.00   | 3.387 | 2.869   | 0.987   | 2.00  | 2.00  | 3.00   | 3.00   | 4.00   |
| 0.15 | 3.209 | 0.3224310 | 0.0286744 | 1.10 | 0.80 | 83.488  | 74.270  | 16.00 | 31.00 | 61.00  | 113.00 | 179.00 | 3.387 | 104.233 | 96.036  | 19.00 | 36.00 | 75.00  | 142.00 | 230.10 |
| 0.15 | 3.209 | 0.3224310 | 0.0286744 | 1.20 | 0.80 | 28.763  | 21.010  | 9.00  | 14.00 | 23.00  | 37.00  | 56.00  | 3.387 | 33.356  | 24.431  | 11.00 | 16.00 | 26.00  | 44.00  | 65.00  |
| 0.15 | 3.209 | 0.3224310 | 0.0286744 | 1.30 | 0.80 | 14.703  | 7.955   | 7.00  | 9.00  | 13.00  | 18.00  | 25.00  | 3.387 | 16.094  | 9.012   | 7.00  | 10.00 | 14.00  | 20.00  | 28.00  |
| 0.15 | 3.209 | 0.3224310 | 0.0286744 | 1.40 | 0.80 | 9.747   | 4.190   | 5.00  | 7.00  | 9.00   | 12.00  | 15.00  | 3.387 | 10.424  | 4.491   | 6.00  | 7.00  | 9.00   | 12.00  | 16.00  |
| 0.15 | 3.209 | 0.3224310 | 0.0286744 | 0.90 | 0.80 | 45.765  | 39.358  | 10.00 | 18.00 | 34.00  | 61.00  | 96.10  | 3.387 | 52.352  | 45.963  | 11.00 | 20.00 | 39.00  | 70.00  | 113.00 |
| 0.15 | 3.209 | 0.3224310 | 0.0286744 | 0.80 | 0.80 | 13.308  | 8.524   | 5.00  | 7.00  | 11.00  | 17.00  | 24.00  | 3.387 | 14.482  | 9.289   | 6.00  | 8.00  | 12.00  | 18.00  | 26.00  |
| 0.15 | 3.209 | 0.3224310 | 0.0286744 | 0.70 | 0.80 | 6.497   | 3.175   | 3.00  | 4.00  | 6.00   | 8.00   | 11.00  | 3.387 | 6.781   | 3.295   | 3.00  | 4.00  | 6.00   | 8.00   | 11.00  |
| 0.15 | 3.209 | 0.3224310 | 0.0286744 | 0.60 | 0.80 | 4.017   | 1.632   | 2.00  | 3.00  | 4.00   | 5.00   | 6.00   | 3.387 | 4.147   | 1.654   | 2.00  | 3.00  | 4.00   | 5.00   | 6.00   |
| 0.15 | 3.209 | 0.3224310 | 0.0286744 | 0.50 | 0.80 | 2.766   | 0.963   | 2.00  | 2.00  | 3.00   | 3.00   | 4.00   | 3.387 | 2.851   | 0.983   | 2.00  | 2.00  | 3.00   | 3.00   | 4.00   |
| 0.15 | 3.209 | 0.3224310 | 0.0286744 | 1.10 | 0.70 | 57.029  | 49.871  | 13.00 | 22.00 | 42.00  | 75.00  | 121.00 | 3.387 | 70.431  | 61.253  | 16.00 | 28.00 | 52.00  | 95.00  | 148.00 |
| 0.15 | 3.209 | 0.3224310 | 0.0286744 | 1.20 | 0.70 | 26.223  | 18.307  | 9.00  | 13.00 | 21.00  | 34.00  | 50.00  | 3.387 | 29.878  | 21.318  | 10.00 | 15.00 | 24.00  | 38.00  | 57.00  |
| 0.15 | 3.209 | 0.3224310 | 0.0286744 | 1.30 | 0.70 | 14.329  | 7.660   | 7.00  | 9.00  | 12.00  | 18.00  | 24.00  | 3.387 | 15.456  | 8.475   | 7.00  | 9.00  | 13.00  | 19.00  | 27.00  |
| 0.15 | 3.209 | 0.3224310 | 0.0286744 | 1.40 | 0.70 | 9.668   | 4.137   | 5.00  | 7.00  | 9.00   | 12.00  | 15.00  | 3.387 | 10.359  | 4.508   | 6.00  | 7.00  | 9.00   | 12.00  | 16.00  |
| 0.15 | 3.209 | 0.3224310 | 0.0286744 | 0.90 | 0.70 | 37.546  | 31.183  | 10.00 | 16.00 | 28.00  | 49.00  | 78.00  | 3.387 | 43.112  | 36.011  | 10.00 | 18.00 | 33.00  | 57.00  | 91.00  |
| 0.15 | 3.209 | 0.3224310 | 0.0286744 | 0.80 | 0.70 | 12.951  | 8.128   | 5.00  | 7.00  | 11.00  | 16.00  | 23.00  | 3.387 | 14.061  | 8.871   | 5.00  | 8.00  | 12.00  | 18.00  | 26.00  |
| 0.15 | 3.209 | 0.3224310 | 0.0286744 | 0.70 | 0.70 | 6.486   | 3.152   | 3.00  | 4.00  | 6.00   |        |        |       |         |         |       |       |        |        |        |

|      |       |           |           |      |      |        |        |      |       |       |       |       |       |        |        |      |       |       |       |       |
|------|-------|-----------|-----------|------|------|--------|--------|------|-------|-------|-------|-------|-------|--------|--------|------|-------|-------|-------|-------|
| 0.15 | 3.209 | 0.3224310 | 0.0286744 | 1.40 | 0.60 | 9.461  | 3.960  | 5.00 | 7.00  | 9.00  | 11.00 | 15.00 | 3.387 | 10.040 | 4.239  | 6.00 | 7.00  | 9.00  | 12.00 | 16.00 |
| 0.15 | 3.209 | 0.3224310 | 0.0286744 | 0.90 | 0.60 | 27.556 | 20.848 | 8.00 | 13.00 | 22.00 | 36.00 | 55.00 | 3.387 | 31.003 | 23.140 | 9.00 | 15.00 | 25.00 | 41.00 | 61.00 |
| 0.15 | 3.209 | 0.3224310 | 0.0286744 | 0.80 | 0.60 | 12.213 | 7.224  | 5.00 | 7.00  | 10.00 | 15.00 | 22.00 | 3.387 | 13.317 | 8.123  | 5.00 | 8.00  | 11.00 | 17.00 | 24.00 |
| 0.15 | 3.209 | 0.3224310 | 0.0286744 | 0.70 | 0.60 | 6.449  | 3.096  | 3.00 | 4.00  | 6.00  | 8.00  | 10.00 | 3.387 | 6.684  | 3.191  | 3.00 | 4.00  | 6.00  | 8.00  | 11.00 |
| 0.15 | 3.209 | 0.3224310 | 0.0286744 | 0.60 | 0.60 | 3.978  | 1.586  | 2.00 | 3.00  | 4.00  | 5.00  | 6.00  | 3.387 | 4.129  | 1.663  | 2.00 | 3.00  | 4.00  | 5.00  | 6.00  |
| 0.15 | 3.209 | 0.3224310 | 0.0286744 | 0.50 | 0.60 | 2.760  | 0.946  | 2.00 | 2.00  | 3.00  | 3.00  | 4.00  | 3.387 | 2.825  | 0.966  | 2.00 | 2.00  | 3.00  | 3.00  | 4.00  |
| 0.15 | 3.209 | 0.3224310 | 0.0286744 | 1.10 | 0.50 | 20.882 | 14.055 | 8.00 | 11.00 | 17.00 | 27.00 | 39.00 | 3.387 | 23.273 | 15.800 | 8.00 | 12.00 | 19.00 | 30.00 | 44.00 |
| 0.15 | 3.209 | 0.3224310 | 0.0286744 | 1.20 | 0.50 | 16.496 | 9.534  | 7.00 | 10.00 | 14.00 | 21.00 | 29.00 | 3.387 | 18.488 | 10.769 | 8.00 | 11.00 | 16.00 | 23.00 | 33.00 |
| 0.15 | 3.209 | 0.3224310 | 0.0286744 | 1.30 | 0.50 | 12.005 | 5.786  | 6.00 | 8.00  | 11.00 | 15.00 | 20.00 | 3.387 | 13.092 | 6.432  | 7.00 | 9.00  | 12.00 | 16.00 | 21.00 |
| 0.15 | 3.209 | 0.3224310 | 0.0286744 | 1.40 | 0.50 | 8.982  | 3.461  | 5.00 | 6.00  | 8.00  | 11.00 | 14.00 | 3.387 | 9.641  | 3.864  | 6.00 | 7.00  | 9.00  | 12.00 | 15.00 |
| 0.15 | 3.209 | 0.3224310 | 0.0286744 | 0.90 | 0.50 | 18.487 | 11.771 | 7.00 | 10.00 | 15.00 | 23.00 | 34.00 | 3.387 | 20.232 | 13.374 | 8.00 | 11.00 | 17.00 | 26.00 | 37.00 |
| 0.15 | 3.209 | 0.3224310 | 0.0286744 | 0.80 | 0.50 | 10.894 | 5.853  | 5.00 | 7.00  | 10.00 | 14.00 | 18.00 | 3.387 | 11.837 | 6.592  | 5.00 | 7.00  | 10.00 | 15.00 | 20.00 |
| 0.15 | 3.209 | 0.3224310 | 0.0286744 | 0.70 | 0.50 | 6.285  | 2.896  | 3.00 | 4.00  | 6.00  | 8.00  | 10.00 | 3.387 | 6.616  | 3.040  | 3.00 | 4.00  | 6.00  | 8.00  | 11.00 |
| 0.15 | 3.209 | 0.3224310 | 0.0286744 | 0.60 | 0.50 | 3.969  | 1.588  | 2.00 | 3.00  | 4.00  | 5.00  | 6.00  | 3.387 | 4.156  | 1.654  | 2.00 | 3.00  | 4.00  | 5.00  | 6.00  |
| 0.15 | 3.209 | 0.3224310 | 0.0286744 | 0.50 | 0.50 | 2.786  | 0.974  | 2.00 | 2.00  | 3.00  | 3.00  | 4.00  | 3.387 | 2.840  | 0.986  | 2.00 | 2.00  | 3.00  | 3.00  | 4.00  |

$ARL_0 = 370$

$ARL_0 = 500$

| Case 4    |       |           |           |      |      |         |         |       |        |        |        |        |       |         |         |       |        |        |        |         |
|-----------|-------|-----------|-----------|------|------|---------|---------|-------|--------|--------|--------|--------|-------|---------|---------|-------|--------|--------|--------|---------|
| $\phi=31$ |       |           |           |      |      |         |         |       |        |        |        |        |       |         |         |       |        |        |        |         |
| 0.05      | 2.709 | 0.1808844 | 0.0091702 | 1.00 | 1.00 | 370.569 | 357.996 | 51.00 | 117.00 | 262.00 | 512.25 | 835.00 | 2.910 | 500.684 | 492.713 | 65.00 | 153.00 | 349.00 | 686.00 | 1133.10 |
| 0.05      | 2.709 | 0.1808844 | 0.0091702 | 1.10 | 1.10 | 133.912 | 112.128 | 32.00 | 54.00  | 100.00 | 178.00 | 282.00 | 2.910 | 169.453 | 145.681 | 38.00 | 67.00  | 125.00 | 227.00 | 358.00  |
| 0.05      | 2.709 | 0.1808844 | 0.0091702 | 1.20 | 1.10 | 49.139  | 30.929  | 20.00 | 27.00  | 41.00  | 62.00  | 89.00  | 2.910 | 54.857  | 35.364  | 21.00 | 30.00  | 45.00  | 69.00  | 101.00  |
| 0.05      | 2.709 | 0.1808844 | 0.0091702 | 1.30 | 1.10 | 28.164  | 13.493  | 14.00 | 19.00  | 25.00  | 34.00  | 46.00  | 2.910 | 30.488  | 14.780  | 16.00 | 20.00  | 27.00  | 37.00  | 50.00   |
| 0.05      | 2.709 | 0.1808844 | 0.0091702 | 1.40 | 1.10 | 20.036  | 7.726   | 12.00 | 15.00  | 18.00  | 24.00  | 30.00  | 2.910 | 21.581  | 8.346   | 13.00 | 16.00  | 20.00  | 26.00  | 32.00   |
| 0.05      | 2.709 | 0.1808844 | 0.0091702 | 0.90 | 1.10 | 81.149  | 65.299  | 21.00 | 35.00  | 63.00  | 107.00 | 166.00 | 2.910 | 96.007  | 77.141  | 24.00 | 41.00  | 73.00  | 128.00 | 198.00  |
| 0.05      | 2.709 | 0.1808844 | 0.0091702 | 0.80 | 1.10 | 27.180  | 16.633  | 11.00 | 16.00  | 23.00  | 35.00  | 48.00  | 2.910 | 29.191  | 17.540  | 12.00 | 17.00  | 25.00  | 37.00  | 52.00   |
| 0.05      | 2.709 | 0.1808844 | 0.0091702 | 0.70 | 1.10 | 14.040  | 6.775   | 7.00  | 9.00   | 13.00  | 17.00  | 23.00  | 2.910 | 14.832  | 7.093   | 7.00  | 10.00  | 13.00  | 18.00  | 24.00   |
| 0.05      | 2.709 | 0.1808844 | 0.0091702 | 0.60 | 1.10 | 8.795   | 3.574   | 5.00  | 6.00   | 8.00   | 11.00  | 14.00  | 2.910 | 9.119   | 3.643   | 5.00  | 7.00   | 9.00   | 11.00  | 14.00   |
| 0.05      | 2.709 | 0.1808844 | 0.0091702 | 0.50 | 1.10 | 6.008   | 2.172   | 4.00  | 4.00   | 6.00   | 7.00   | 9.00   | 2.910 | 6.232   | 2.207   | 4.00  | 5.00   | 6.00   | 7.00   | 9.00    |
| 0.05      | 2.709 | 0.1808844 | 0.0091702 | 1.10 | 1.20 | 118.610 | 95.393  | 31.00 | 51.00  | 90.00  | 155.00 | 245.00 | 2.910 | 147.517 | 121.135 | 37.00 | 61.00  | 112.00 | 197.00 | 304.00  |
| 0.05      | 2.709 | 0.1808844 | 0.0091702 | 1.20 | 1.20 | 47.955  | 29.128  | 19.00 | 27.00  | 41.00  | 60.00  | 87.00  | 2.910 | 53.971  | 33.554  | 21.00 | 30.00  | 45.00  | 69.00  | 98.00   |
| 0.05      | 2.709 | 0.1808844 | 0.0091702 | 1.30 | 1.20 | 27.819  | 13.101  | 14.00 | 19.00  | 25.00  | 34.00  | 45.00  | 2.910 | 30.479  | 14.314  | 16.00 | 20.00  | 27.00  | 37.00  | 49.00   |
| 0.05      | 2.709 | 0.1808844 | 0.0091702 | 1.40 | 1.20 | 20.011  | 7.720   | 12.00 | 14.00  | 18.00  | 24.00  | 30.00  | 2.910 | 21.358  | 8.311   | 13.00 | 15.00  | 20.00  | 25.00  | 32.00   |
| 0.05      | 2.709 | 0.1808844 | 0.0091702 | 0.90 | 1.20 | 75.415  | 58.275  | 21.00 | 34.00  | 59.00  | 99.00  | 151.00 | 2.910 | 88.184  | 69.642  | 23.00 | 39.00  | 68.00  | 117.00 | 179.00  |
| 0.05      | 2.709 | 0.1808844 | 0.0091702 | 0.80 | 1.20 | 26.818  | 15.834  | 11.00 | 15.00  | 23.00  | 34.00  | 47.00  | 2.910 | 29.076  | 17.056  | 12.00 | 17.00  | 25.00  | 37.00  | 51.00   |
| 0.05      | 2.709 | 0.1808844 | 0.0091702 | 0.70 | 1.20 | 14.049  | 6.661   | 7.00  | 9.00   | 13.00  | 17.00  | 23.00  | 2.910 | 14.754  | 6.971   | 7.00  | 10.00  | 13.00  | 18.00  | 24.00   |
| 0.05      | 2.709 | 0.1808844 | 0.0091702 | 0.60 | 1.20 | 8.747   | 3.561   | 5.00  | 6.00   | 8.00   | 11.00  | 13.00  | 2.910 | 9.124   | 3.736   | 5.00  | 6.00   | 8.00   | 11.00  | 14.00   |
| 0.05      | 2.709 | 0.1808844 | 0.0091702 | 0.50 | 1.20 | 5.947   | 2.148   | 4.00  | 4.00   | 6.00   | 7.00   | 9.00   | 2.910 | 6.281   | 2.260   | 4.00  | 5.00   | 6.00   | 7.00   | 9.00    |
| 0.05      | 2.709 | 0.1808844 | 0.0091702 | 1.10 | 1.30 | 97.760  | 76.017  | 29.00 | 45.00  | 76.00  | 127.00 | 192.00 | 2.910 | 118.875 | 92.800  | 34.00 | 53.00  | 92.00  | 155.00 | 243.00  |
| 0.05      | 2.709 | 0.1808844 | 0.0091702 | 1.20 | 1.30 | 45.703  | 27.517  | 19.00 | 26.00  | 39.00  | 57.00  | 81.00  | 2.910 | 51.104  | 31.232  | 21.00 | 29.00  | 43.00  | 64.00  | 92.00   |
| 0.05      | 2.709 | 0.1808844 | 0.0091702 | 1.30 | 1.30 | 27.589  | 12.806  | 14.00 | 18.00  | 25.00  | 33.25  | 44.00  | 2.910 | 30.184  | 14.057  | 16.00 | 20.00  | 27.00  | 37.00  | 49.00   |
| 0.05      | 2.709 | 0.1808844 | 0.0091702 | 1.40 | 1.30 | 19.866  | 7.482   | 12.00 | 14.00  | 18.00  | 24.00  | 30.00  | 2.910 | 21.318  | 8.184   | 13.00 | 15.00  | 20.00  | 26.00  | 32.00   |
| 0.05      | 2.709 | 0.1808844 | 0.0091702 | 0.90 | 1.30 | 67.502  | 50.807  | 20.00 | 32.00  | 54.00  | 88.00  | 133.00 | 2.910 | 79.469  | 60.200  | 23.00 | 37.00  | 63.00  | 104.00 | 158.00  |
| 0.05      | 2.709 | 0.1808844 | 0.0091702 | 0.80 | 1.30 | 26.755  | 15.564  | 11.00 | 16.00  | 23.00  | 34.00  | 47.00  | 2.910 | 28.517  | 16.734  | 12.00 | 17.00  | 25.00  | 36.00  | 51.00   |
| 0.05      | 2.709 | 0.1808844 | 0.0091702 | 0.70 | 1.30 | 14.051  | 6.681   | 7.00  | 9.00   | 13.00  | 17.00  | 23.00  | 2.910 | 14.754  | 6.952   | 7.00  | 10.00  | 13.00  | 18.00  | 24.00   |
| 0.05      | 2.709 | 0.1808844 | 0.0091702 | 0.60 | 1.30 | 8.737   | 3.567   | 5.00  | 6.00   | 8.00   | 11.00  | 13.00  | 2.910 | 9.117   | 3.659   | 5.00  | 6.00   | 8.00   | 11.00  | 14.00   |
| 0.05      | 2.709 | 0.1808844 | 0.0091702 | 0.50 | 1.30 | 6.033   | 2.171   | 4.00  | 4.00   | 6.00   | 7.00   | 9.00   | 2.910 | 6.214   | 2.207   | 4.00  | 5.00   | 6.00   | 7.00   | 9.00    |
| 0.05      | 2.709 | 0.1808844 | 0.0091702 | 1.10 | 1.40 | 78.605  | 56.638  | 26.00 | 39.00  | 62.00  | 101.00 | 150.00 | 2.910 | 95.766  | 72.387  | 30.00 | 45.00  | 75.00  | 124.00 | 188.00  |
| 0.05      | 2.709 | 0.1808844 | 0.0091702 | 1.20 | 1.40 | 43.368  | 24.541  | 19.00 | 26.00  | 37.00  | 55.00  | 76.00  | 2.910 | 49.033  | 28.509  | 21.00 | 29.00  | 42.00  | 62.00  | 86.00   |
| 0.05      | 2.709 | 0.1808844 | 0.0091702 | 1.30 | 1.40 | 27.401  | 12.494  | 14.00 | 18.00  | 25.00  | 33.00  | 44.00  | 2.910 | 29.495  | 13.267  | 16.00 | 20.00  | 27.00  | 36.00  | 47.00   |
| 0.05      | 2.709 | 0.1808844 | 0.0091702 | 1.40 | 1.40 | 19.890  | 7.449   | 12.00 | 15.00  | 18.00  | 24.00  | 30.00  | 2.910 | 21.350  | 8.181   | 13.00 | 16.00  | 20.00  | 25.25  | 32.00   |
| 0.05      | 2.709 | 0.1808844 | 0.0091702 | 0.90 | 1.40 | 59.241  | 41.177  | 20.00 | 30.00  | 48.00  | 77.00  | 113.00 | 2.910 | 69.958  | 50.248  | 22.00 | 34.00  | 56.00  | 91.00  | 136.00  |
| 0.05      | 2.709 | 0.1808844 | 0.0091702 | 0.80 | 1.40 | 26.204  | 15.021  | 11.00 | 16.00  | 23.00  | 33.00  | 46.00  | 2.910 | 28.105  | 16.020  | 12.00 | 16.75  | 24.50  | 36.00  | 49.00   |
| 0.05      | 2.709 | 0.1808844 | 0.0091702 | 0.70 | 1.40 | 14.062  | 6.647   | 7.00  | 9.00   | 13.00  | 17.00  | 23.00  | 2.910 | 14.736  | 6.951   | 7.00  | 10.00  | 13.00  | 18.00  | 24.00   |
| 0.05      | 2.709 | 0.1808844 | 0.0091702 | 0.60 | 1.40 | 8.752   | 3.601   | 5.00  | 6.00   | 8.00   | 11.00  | 13.00  | 2.910 | 9.184   | 3.670   | 5.00  | 7.00   | 9.00   | 11.00  | 14.00   |
| 0.05      | 2.709 | 0.1808844 | 0.0091702 | 0.50 | 1.40 | 5.985   | 2.176   | 4.00  | 4.00   | 6.00   | 7.00   | 9.00   | 2.910 | 6.268   | 2.257   | 4.00  | 5.00   | 6.00   | 7.00   | 9.00    |
| 0.05      | 2.709 | 0.1808844 | 0.0091702 | 1.10 | 0.90 | 115.133 | 94.266  | 29.00 | 48.00  | 88.00  | 152.00 | 239.00 | 2.910 | 137.715 | 115.023 | 33.00 | 56.00  | 104.00 | 182.25 | 288.00  |
| 0.05      | 2.709 | 0.1808844 | 0.0091702 | 1.20 | 0.90 | 46.919  | 29.702  | 19.00 | 26.00  | 39.00  | 59.00  | 85.00  | 2.910 | 52.998  | 34.010  | 21.00 | 29.00  | 44.00  | 67.00  | 98.00   |
| 0.05      | 2.709 | 0.1808844 | 0.0091702 | 1.30 | 0.90 |         |         |       |        |        |        |        |       |         |         |       |        |        |        |         |

|      |       |           |           |      |      |         |         |       |        |        |        |        |       |         |         |       |        |        |        |         |
|------|-------|-----------|-----------|------|------|---------|---------|-------|--------|--------|--------|--------|-------|---------|---------|-------|--------|--------|--------|---------|
| 0.05 | 2.709 | 0.1808844 | 0.0091702 | 0.60 | 0.90 | 8.715   | 3.517   | 5.00  | 6.00   | 8.00   | 11.00  | 13.00  | 2.910 | 9.253   | 3.691   | 5.00  | 7.00   | 9.00   | 11.00  | 14.00   |
| 0.05 | 2.709 | 0.1808844 | 0.0091702 | 0.50 | 0.90 | 5.964   | 2.181   | 4.00  | 4.00   | 6.00   | 7.00   | 9.00   | 2.910 | 6.230   | 2.196   | 4.00  | 5.00   | 6.00   | 7.00   | 9.00    |
| 0.05 | 2.709 | 0.1808844 | 0.0091702 | 1.10 | 0.80 | 80.228  | 62.404  | 23.00 | 36.00  | 62.00  | 106.00 | 162.00 | 2.910 | 95.558  | 75.799  | 27.00 | 43.00  | 74.00  | 124.00 | 192.00  |
| 0.05 | 2.709 | 0.1808844 | 0.0091702 | 1.20 | 0.80 | 42.631  | 25.395  | 17.00 | 25.00  | 36.00  | 54.00  | 75.00  | 2.910 | 47.624  | 28.710  | 20.00 | 27.00  | 40.00  | 60.00  | 85.00   |
| 0.05 | 2.709 | 0.1808844 | 0.0091702 | 1.30 | 0.80 | 26.699  | 12.267  | 14.00 | 18.00  | 24.00  | 33.00  | 43.00  | 2.910 | 29.259  | 13.978  | 15.00 | 19.00  | 26.00  | 36.00  | 47.00   |
| 0.05 | 2.709 | 0.1808844 | 0.0091702 | 1.40 | 0.80 | 19.721  | 7.635   | 12.00 | 14.00  | 18.00  | 24.00  | 30.00  | 2.910 | 21.071  | 8.043   | 13.00 | 15.00  | 19.00  | 25.00  | 32.00   |
| 0.05 | 2.709 | 0.1808844 | 0.0091702 | 0.90 | 0.80 | 60.149  | 45.814  | 18.00 | 28.00  | 47.00  | 78.00  | 120.00 | 2.910 | 67.626  | 51.036  | 21.00 | 32.00  | 53.00  | 88.00  | 134.00  |
| 0.05 | 2.709 | 0.1808844 | 0.0091702 | 0.80 | 0.80 | 25.540  | 14.831  | 11.00 | 15.00  | 22.00  | 32.00  | 45.00  | 2.910 | 27.719  | 16.203  | 11.00 | 16.00  | 24.00  | 35.00  | 48.00   |
| 0.05 | 2.709 | 0.1808844 | 0.0091702 | 0.70 | 0.80 | 13.718  | 6.371   | 7.00  | 9.00   | 12.00  | 17.00  | 22.00  | 2.910 | 14.642  | 6.953   | 7.00  | 10.00  | 13.00  | 18.00  | 24.00   |
| 0.05 | 2.709 | 0.1808844 | 0.0091702 | 0.60 | 0.80 | 8.773   | 3.556   | 5.00  | 6.00   | 8.00   | 11.00  | 14.00  | 2.910 | 9.126   | 3.644   | 5.00  | 7.00   | 9.00   | 11.00  | 14.00   |
| 0.05 | 2.709 | 0.1808844 | 0.0091702 | 0.50 | 0.80 | 5.987   | 2.157   | 4.00  | 4.00   | 6.00   | 7.00   | 9.00   | 2.910 | 6.245   | 2.213   | 4.00  | 5.00   | 6.00   | 7.00   | 9.00    |
| 0.05 | 2.709 | 0.1808844 | 0.0091702 | 1.10 | 0.70 | 49.507  | 33.110  | 18.00 | 26.00  | 41.00  | 63.00  | 92.00  | 2.910 | 56.447  | 39.159  | 19.00 | 29.00  | 46.00  | 71.00  | 108.00  |
| 0.05 | 2.709 | 0.1808844 | 0.0091702 | 1.20 | 0.70 | 35.235  | 19.410  | 16.00 | 21.00  | 31.00  | 44.00  | 61.00  | 2.910 | 38.735  | 21.389  | 17.00 | 24.00  | 34.00  | 49.00  | 67.00   |
| 0.05 | 2.709 | 0.1808844 | 0.0091702 | 1.30 | 0.70 | 24.974  | 11.139  | 13.00 | 17.00  | 23.00  | 30.00  | 40.00  | 2.910 | 27.117  | 12.157  | 14.00 | 18.00  | 25.00  | 33.00  | 43.00   |
| 0.05 | 2.709 | 0.1808844 | 0.0091702 | 1.40 | 0.70 | 19.032  | 7.030   | 11.00 | 14.00  | 18.00  | 23.00  | 28.00  | 2.910 | 20.396  | 7.643   | 12.00 | 15.00  | 19.00  | 24.00  | 30.00   |
| 0.05 | 2.709 | 0.1808844 | 0.0091702 | 0.90 | 0.70 | 42.556  | 27.885  | 16.00 | 23.00  | 35.00  | 55.00  | 79.00  | 2.910 | 47.375  | 31.971  | 17.00 | 25.00  | 39.00  | 60.25  | 88.00   |
| 0.05 | 2.709 | 0.1808844 | 0.0091702 | 0.80 | 0.70 | 23.451  | 12.811  | 10.00 | 14.00  | 21.00  | 29.00  | 40.00  | 2.910 | 25.388  | 13.758  | 11.00 | 16.00  | 22.00  | 32.00  | 43.00   |
| 0.05 | 2.709 | 0.1808844 | 0.0091702 | 0.70 | 0.70 | 13.582  | 6.243   | 7.00  | 9.00   | 12.00  | 17.00  | 22.00  | 2.910 | 14.442  | 6.673   | 7.00  | 10.00  | 13.00  | 18.00  | 23.00   |
| 0.05 | 2.709 | 0.1808844 | 0.0091702 | 0.60 | 0.70 | 8.721   | 3.506   | 5.00  | 6.00   | 8.00   | 11.00  | 13.00  | 2.910 | 9.215   | 3.691   | 5.00  | 7.00   | 9.00   | 11.00  | 14.00   |
| 0.05 | 2.709 | 0.1808844 | 0.0091702 | 0.50 | 0.70 | 5.967   | 2.146   | 4.00  | 4.00   | 6.00   | 7.00   | 9.00   | 2.910 | 6.250   | 2.218   | 4.00  | 5.00   | 6.00   | 7.00   | 9.00    |
| 0.05 | 2.709 | 0.1808844 | 0.0091702 | 1.10 | 0.60 | 30.485  | 17.125  | 13.00 | 18.00  | 27.00  | 38.00  | 53.00  | 2.910 | 33.144  | 18.805  | 14.00 | 20.00  | 29.00  | 42.00  | 58.00   |
| 0.05 | 2.709 | 0.1808844 | 0.0091702 | 1.20 | 0.60 | 26.527  | 13.034  | 13.00 | 17.00  | 24.00  | 33.00  | 43.00  | 2.910 | 28.759  | 14.218  | 14.00 | 19.00  | 26.00  | 36.00  | 47.00   |
| 0.05 | 2.709 | 0.1808844 | 0.0091702 | 1.30 | 0.60 | 21.561  | 8.907   | 12.00 | 15.00  | 20.00  | 26.00  | 33.00  | 2.910 | 23.353  | 9.684   | 13.00 | 16.00  | 22.00  | 28.00  | 36.00   |
| 0.05 | 2.709 | 0.1808844 | 0.0091702 | 1.40 | 0.60 | 17.706  | 6.310   | 11.00 | 13.00  | 17.00  | 21.00  | 26.00  | 2.910 | 19.080  | 6.751   | 12.00 | 14.00  | 18.00  | 23.00  | 28.00   |
| 0.05 | 2.709 | 0.1808844 | 0.0091702 | 0.90 | 0.60 | 28.184  | 15.000  | 13.00 | 17.00  | 25.00  | 35.00  | 48.00  | 2.910 | 30.793  | 17.303  | 14.00 | 19.00  | 27.00  | 38.00  | 53.00   |
| 0.05 | 2.709 | 0.1808844 | 0.0091702 | 0.80 | 0.60 | 20.358  | 9.713   | 10.00 | 13.00  | 18.00  | 25.00  | 33.00  | 2.910 | 22.025  | 10.690  | 11.00 | 14.00  | 20.00  | 27.00  | 36.00   |
| 0.05 | 2.709 | 0.1808844 | 0.0091702 | 0.70 | 0.60 | 13.120  | 5.712   | 7.00  | 9.00   | 12.00  | 16.00  | 21.00  | 2.910 | 13.943  | 6.017   | 7.00  | 10.00  | 13.00  | 17.00  | 22.00   |
| 0.05 | 2.709 | 0.1808844 | 0.0091702 | 0.60 | 0.60 | 8.625   | 3.382   | 5.00  | 6.00   | 8.00   | 11.00  | 13.00  | 2.910 | 9.168   | 3.587   | 5.00  | 7.00   | 9.00   | 11.00  | 14.00   |
| 0.05 | 2.709 | 0.1808844 | 0.0091702 | 0.50 | 0.60 | 6.003   | 2.160   | 4.00  | 4.00   | 6.00   | 7.00   | 9.00   | 2.910 | 6.234   | 2.175   | 4.00  | 5.00   | 6.00   | 7.00   | 9.00    |
| 0.05 | 2.709 | 0.1808844 | 0.0091702 | 1.10 | 0.50 | 19.144  | 8.342   | 10.00 | 13.00  | 17.00  | 23.00  | 30.00  | 2.910 | 20.620  | 9.157   | 11.00 | 14.00  | 19.00  | 25.00  | 33.00   |
| 0.05 | 2.709 | 0.1808844 | 0.0091702 | 1.20 | 0.50 | 18.595  | 7.604   | 10.00 | 13.00  | 17.00  | 22.00  | 29.00  | 2.910 | 19.787  | 8.118   | 11.00 | 14.00  | 18.00  | 24.00  | 31.00   |
| 0.05 | 2.709 | 0.1808844 | 0.0091702 | 1.30 | 0.50 | 17.048  | 6.241   | 10.00 | 13.00  | 16.00  | 20.00  | 25.00  | 2.910 | 18.271  | 6.709   | 11.00 | 13.00  | 17.00  | 22.00  | 27.00   |
| 0.05 | 2.709 | 0.1808844 | 0.0091702 | 1.40 | 0.50 | 15.387  | 5.015   | 10.00 | 12.00  | 15.00  | 18.00  | 22.00  | 2.910 | 16.353  | 5.317   | 10.00 | 13.00  | 16.00  | 19.00  | 23.00   |
| 0.05 | 2.709 | 0.1808844 | 0.0091702 | 0.90 | 0.50 | 18.690  | 8.266   | 10.00 | 13.00  | 17.00  | 23.00  | 29.00  | 2.910 | 20.186  | 8.684   | 11.00 | 14.00  | 18.00  | 25.00  | 32.00   |
| 0.05 | 2.709 | 0.1808844 | 0.0091702 | 0.80 | 0.50 | 15.976  | 6.432   | 9.00  | 11.00  | 15.00  | 19.00  | 25.00  | 2.910 | 17.183  | 6.957   | 10.00 | 12.00  | 16.00  | 21.00  | 26.00   |
| 0.05 | 2.709 | 0.1808844 | 0.0091702 | 0.70 | 0.50 | 12.121  | 4.788   | 7.00  | 9.00   | 11.00  | 15.00  | 19.00  | 2.910 | 12.816  | 5.001   | 7.00  | 9.00   | 12.00  | 16.00  | 19.00   |
| 0.05 | 2.709 | 0.1808844 | 0.0091702 | 0.60 | 0.50 | 8.493   | 3.198   | 5.00  | 6.00   | 8.00   | 10.00  | 13.00  | 2.910 | 8.877   | 3.343   | 5.00  | 6.00   | 8.00   | 11.00  | 13.00   |
| 0.05 | 2.709 | 0.1808844 | 0.0091702 | 0.50 | 0.50 | 5.968   | 2.122   | 4.00  | 4.00   | 6.00   | 7.00   | 9.00   | 2.910 | 6.256   | 2.203   | 4.00  | 5.00   | 6.00   | 8.00   | 9.00    |
| 0.10 | 3.027 | 0.2591139 | 0.0188166 | 1.00 | 1.00 | 370.468 | 364.483 | 45.00 | 109.00 | 256.00 | 509.25 | 842.00 | 3.220 | 501.043 | 489.473 | 60.00 | 147.00 | 345.00 | 684.00 | 1135.10 |
| 0.10 | 3.027 | 0.2591139 | 0.0188166 | 1.10 | 1.10 | 249.965 | 233.338 | 38.00 | 83.00  | 178.00 | 339.00 | 563.00 | 3.220 | 344.349 | 331.606 | 50.00 | 109.00 | 243.00 | 470.00 | 766.00  |
| 0.10 | 3.027 | 0.2591139 | 0.0188166 | 1.20 | 1.10 | 73.216  | 60.543  | 19.00 | 31.00  | 54.00  | 97.00  | 153.00 | 3.220 | 88.799  | 74.573  | 22.00 | 37.00  | 66.00  | 117.00 | 186.00  |
| 0.10 | 3.027 | 0.2591139 | 0.0188166 | 1.30 | 1.10 | 34.501  | 22.637  | 13.00 | 19.00  | 28.00  | 44.00  | 64.00  | 3.220 | 39.369  | 27.042  | 14.00 | 21.00  | 32.00  | 50.00  | 74.00   |
| 0.10 | 3.027 | 0.2591139 | 0.0188166 | 1.40 | 1.10 | 21.516  | 11.636  | 10.00 | 13.00  | 19.00  | 27.00  | 37.00  | 3.220 | 23.760  | 13.020  | 11.00 | 15.00  | 21.00  | 29.00  | 40.00   |
| 0.10 | 3.027 | 0.2591139 | 0.0188166 | 0.90 | 1.10 | 94.596  | 85.943  | 18.00 | 35.00  | 68.00  | 127.00 | 204.00 | 3.220 | 109.944 | 102.146 | 20.00 | 39.00  | 78.00  | 147.00 | 239.00  |
| 0.10 | 3.027 | 0.2591139 | 0.0188166 | 0.80 | 1.10 | 26.901  | 19.589  | 8.00  | 13.00  | 21.00  | 35.00  | 52.00  | 3.220 | 29.846  | 22.270  | 9.00  | 14.00  | 24.00  | 38.00  | 59.00   |
| 0.10 | 3.027 | 0.2591139 | 0.0188166 | 0.70 | 1.10 | 12.648  | 7.394   | 5.00  | 7.00   | 11.00  | 16.00  | 22.00  | 3.220 | 13.440  | 7.840   | 6.00  | 8.00   | 12.00  | 17.00  | 24.00   |
| 0.10 | 3.027 | 0.2591139 | 0.0188166 | 0.60 | 1.10 | 7.552   | 3.680   | 4.00  | 5.00   | 7.00   | 9.00   | 12.00  | 3.220 | 7.850   | 3.742   | 4.00  | 5.00   | 7.00   | 10.00  | 13.00   |
| 0.10 | 3.027 | 0.2591139 | 0.0188166 | 0.50 | 1.10 | 5.047   | 2.137   | 3.00  | 4.00   | 5.00   | 6.00   | 8.00   | 3.220 | 5.217   | 2.147   | 3.00  | 4.00   | 5.00   | 6.00   | 8.00    |
| 0.10 | 3.027 | 0.2591139 | 0.0188166 | 1.10 | 1.20 | 245.509 | 237.098 | 40.00 | 80.00  | 175.00 | 329.00 | 549.00 | 3.220 | 347.487 | 327.704 | 51.00 | 110.00 | 247.00 | 478.00 | 793.10  |
| 0.10 | 3.027 | 0.2591139 | 0.0188166 | 1.20 | 1.20 | 72.259  | 59.039  | 19.00 | 31.00  | 54.00  | 94.00  | 149.00 | 3.220 | 89.404  | 73.612  | 22.00 | 37.00  | 68.00  | 119.00 | 188.00  |
| 0.10 | 3.027 | 0.2591139 | 0.0188166 | 1.30 | 1.20 | 34.602  | 22.960  | 13.00 | 19.00  | 28.00  | 44.00  | 65.00  | 3.220 | 39.142  | 26.673  | 14.00 | 20.00  | 32.00  | 50.00  | 74.00   |
| 0.10 | 3.027 | 0.2591139 | 0.0188166 | 1.40 | 1.20 | 21.579  | 11.670  | 10.00 | 13.00  | 19.00  | 27.00  | 37.00  | 3.220 | 23.793  | 13.095  | 11.00 | 15.00  | 20.00  | 29.00  | 41.00   |
| 0.10 | 3.027 | 0.2591139 | 0.0188166 | 0.90 | 1.20 | 93.372  | 82.978  | 18.00 | 35.00  | 68.00  | 125.00 | 205.00 | 3.220 | 110.614 | 101.326 | 20.00 | 39.00  | 80.00  | 148.00 | 243.00  |
| 0.10 | 3.027 | 0.2591139 | 0.0188166 | 0.80 | 1.20 | 27.037  | 19.592  | 8.00  | 13.00  | 22.00  | 35.00  | 53.00  | 3.220 | 30.264  | 22.393  | 9.00  | 14.00  | 24.00  | 39.00  | 59.00   |
| 0.10 | 3.027 | 0.2591139 | 0.0188166 | 0.70 | 1.20 | 12.793  | 7.461   | 5.00  | 7.00   | 11.00  | 16.00  | 23.00  | 3.220 | 13.568  | 8.002   | 6.00  | 8.00   | 12.00  | 17.00  | 24.00   |
| 0.10 | 3.027 | 0.2591139 | 0.0188166 | 0.60 | 1.20 | 7.588   | 3.665   | 4.00  | 5.00   | 7.00   | 9.00   | 12.00  | 3.220 | 7.840   | 3.766   | 4.00  |        |        |        |         |

|      |       |           |           |      |      |         |         |       |       |        |        |        |       |         |         |       |       |        |        |        |
|------|-------|-----------|-----------|------|------|---------|---------|-------|-------|--------|--------|--------|-------|---------|---------|-------|-------|--------|--------|--------|
| 0.10 | 3.027 | 0.2591139 | 0.0188166 | 0.80 | 1.30 | 26.930  | 19.536  | 8.00  | 13.00 | 22.00  | 35.00  | 52.00  | 3.220 | 29.848  | 21.934  | 9.00  | 14.00 | 24.00  | 39.00  | 58.00  |
| 0.10 | 3.027 | 0.2591139 | 0.0188166 | 0.70 | 1.30 | 12.744  | 7.472   | 5.00  | 7.00  | 11.00  | 16.00  | 22.00  | 3.220 | 13.382  | 7.646   | 6.00  | 8.00  | 12.00  | 17.00  | 24.00  |
| 0.10 | 3.027 | 0.2591139 | 0.0188166 | 0.60 | 1.30 | 7.499   | 3.696   | 4.00  | 5.00  | 7.00   | 9.00   | 12.00  | 3.220 | 7.926   | 3.822   | 4.00  | 5.00  | 7.00   | 10.00  | 13.00  |
| 0.10 | 3.027 | 0.2591139 | 0.0188166 | 0.50 | 1.30 | 5.033   | 2.106   | 3.00  | 4.00  | 5.00   | 6.00   | 8.00   | 3.220 | 5.222   | 2.175   | 3.00  | 4.00  | 5.00   | 6.00   | 8.00   |
| 0.10 | 3.027 | 0.2591139 | 0.0188166 | 1.10 | 1.40 | 178.297 | 160.932 | 34.00 | 64.00 | 132.00 | 241.00 | 388.00 | 3.220 | 262.107 | 248.657 | 42.00 | 86.00 | 187.00 | 357.00 | 574.10 |
| 0.10 | 3.027 | 0.2591139 | 0.0188166 | 1.20 | 1.40 | 67.941  | 54.140  | 19.00 | 30.00 | 52.00  | 89.00  | 137.00 | 3.220 | 83.969  | 67.359  | 22.00 | 35.00 | 64.00  | 112.00 | 173.00 |
| 0.10 | 3.027 | 0.2591139 | 0.0188166 | 1.30 | 1.40 | 33.443  | 21.630  | 13.00 | 18.00 | 28.00  | 42.00  | 62.00  | 3.220 | 38.515  | 25.676  | 14.00 | 20.00 | 32.00  | 49.00  | 71.00  |
| 0.10 | 3.027 | 0.2591139 | 0.0188166 | 1.40 | 1.40 | 21.447  | 11.600  | 10.00 | 13.00 | 19.00  | 26.00  | 37.00  | 3.220 | 23.851  | 12.999  | 11.00 | 15.00 | 21.00  | 29.00  | 40.10  |
| 0.10 | 3.027 | 0.2591139 | 0.0188166 | 0.90 | 1.40 | 83.394  | 73.421  | 18.00 | 32.00 | 61.00  | 112.00 | 180.00 | 3.220 | 102.387 | 91.336  | 20.00 | 38.00 | 75.00  | 138.00 | 222.00 |
| 0.10 | 3.027 | 0.2591139 | 0.0188166 | 0.80 | 1.40 | 26.580  | 19.159  | 9.00  | 13.00 | 21.00  | 34.00  | 51.00  | 3.220 | 29.324  | 21.438  | 9.00  | 14.00 | 23.00  | 38.00  | 57.00  |
| 0.10 | 3.027 | 0.2591139 | 0.0188166 | 0.70 | 1.40 | 12.693  | 7.299   | 5.00  | 7.00  | 11.00  | 16.00  | 22.00  | 3.220 | 13.446  | 7.798   | 6.00  | 8.00  | 12.00  | 17.00  | 23.00  |
| 0.10 | 3.027 | 0.2591139 | 0.0188166 | 0.60 | 1.40 | 7.551   | 3.653   | 4.00  | 5.00  | 7.00   | 9.00   | 12.00  | 3.220 | 7.948   | 3.804   | 4.00  | 5.00  | 7.00   | 10.00  | 13.00  |
| 0.10 | 3.027 | 0.2591139 | 0.0188166 | 0.50 | 1.40 | 5.059   | 2.127   | 3.00  | 4.00  | 5.00   | 6.00   | 8.00   | 3.220 | 5.210   | 2.164   | 3.00  | 4.00  | 5.00   | 6.00   | 8.00   |
| 0.10 | 3.027 | 0.2591139 | 0.0188166 | 1.10 | 0.90 | 163.753 | 149.703 | 28.00 | 56.00 | 118.00 | 225.00 | 362.00 | 3.220 | 217.038 | 203.849 | 33.00 | 70.00 | 154.00 | 297.00 | 487.00 |
| 0.10 | 3.027 | 0.2591139 | 0.0188166 | 1.20 | 0.90 | 65.455  | 52.839  | 17.00 | 28.00 | 50.00  | 86.00  | 135.00 | 3.220 | 79.585  | 65.662  | 20.00 | 33.00 | 60.00  | 105.00 | 166.00 |
| 0.10 | 3.027 | 0.2591139 | 0.0188166 | 1.30 | 0.90 | 33.129  | 21.722  | 13.00 | 18.00 | 27.00  | 42.00  | 62.00  | 3.220 | 37.689  | 25.431  | 14.00 | 20.00 | 31.00  | 48.00  | 71.00  |
| 0.10 | 3.027 | 0.2591139 | 0.0188166 | 1.40 | 0.90 | 21.201  | 11.129  | 10.00 | 13.00 | 19.00  | 26.00  | 35.00  | 3.220 | 23.543  | 12.767  | 11.00 | 15.00 | 20.00  | 29.00  | 40.00  |
| 0.10 | 3.027 | 0.2591139 | 0.0188166 | 0.90 | 0.90 | 80.932  | 70.739  | 16.00 | 30.00 | 59.00  | 110.00 | 176.00 | 3.220 | 94.127  | 83.965  | 18.00 | 35.00 | 69.00  | 126.25 | 203.00 |
| 0.10 | 3.027 | 0.2591139 | 0.0188166 | 0.80 | 0.90 | 26.388  | 18.908  | 8.00  | 13.00 | 21.00  | 34.00  | 51.00  | 3.220 | 28.910  | 20.945  | 9.00  | 14.00 | 23.00  | 37.25  | 56.10  |
| 0.10 | 3.027 | 0.2591139 | 0.0188166 | 0.70 | 0.90 | 12.684  | 7.240   | 5.00  | 7.00  | 11.00  | 16.00  | 22.00  | 3.220 | 13.359  | 7.637   | 6.00  | 8.00  | 12.00  | 17.00  | 23.00  |
| 0.10 | 3.027 | 0.2591139 | 0.0188166 | 0.60 | 0.90 | 7.451   | 3.566   | 4.00  | 5.00  | 7.00   | 9.00   | 12.00  | 3.220 | 7.900   | 3.848   | 4.00  | 5.00  | 7.00   | 10.00  | 13.00  |
| 0.10 | 3.027 | 0.2591139 | 0.0188166 | 0.50 | 0.90 | 5.007   | 2.098   | 3.00  | 3.00  | 5.00   | 6.00   | 8.00   | 3.220 | 5.213   | 2.185   | 3.00  | 4.00  | 5.00   | 6.00   | 8.00   |
| 0.10 | 3.027 | 0.2591139 | 0.0188166 | 1.10 | 0.80 | 106.275 | 95.757  | 21.00 | 39.00 | 77.00  | 143.00 | 229.00 | 3.220 | 131.593 | 119.129 | 24.00 | 46.00 | 95.00  | 178.00 | 293.00 |
| 0.10 | 3.027 | 0.2591139 | 0.0188166 | 1.20 | 0.80 | 55.747  | 44.532  | 16.00 | 25.00 | 43.00  | 73.00  | 113.00 | 3.220 | 67.728  | 55.285  | 18.00 | 29.00 | 51.00  | 88.00  | 140.00 |
| 0.10 | 3.027 | 0.2591139 | 0.0188166 | 1.30 | 0.80 | 31.104  | 20.041  | 12.00 | 17.00 | 26.00  | 39.00  | 57.00  | 3.220 | 35.590  | 23.752  | 14.00 | 19.00 | 29.00  | 45.00  | 66.00  |
| 0.10 | 3.027 | 0.2591139 | 0.0188166 | 1.40 | 0.80 | 20.842  | 10.929  | 10.00 | 13.00 | 18.00  | 26.00  | 35.00  | 3.220 | 22.913  | 12.255  | 11.00 | 14.00 | 20.00  | 28.00  | 39.00  |
| 0.10 | 3.027 | 0.2591139 | 0.0188166 | 0.90 | 0.80 | 64.268  | 55.559  | 15.00 | 25.00 | 48.00  | 85.00  | 135.00 | 3.220 | 75.915  | 66.273  | 17.00 | 29.00 | 56.00  | 101.00 | 161.00 |
| 0.10 | 3.027 | 0.2591139 | 0.0188166 | 0.80 | 0.80 | 25.099  | 17.960  | 8.00  | 13.00 | 20.00  | 32.00  | 48.00  | 3.220 | 27.913  | 20.147  | 9.00  | 14.00 | 23.00  | 36.00  | 54.00  |
| 0.10 | 3.027 | 0.2591139 | 0.0188166 | 0.70 | 0.80 | 12.436  | 7.019   | 5.00  | 7.00  | 11.00  | 16.00  | 22.00  | 3.220 | 13.136  | 7.374   | 6.00  | 8.00  | 11.00  | 17.00  | 23.00  |
| 0.10 | 3.027 | 0.2591139 | 0.0188166 | 0.60 | 0.80 | 7.533   | 3.620   | 4.00  | 5.00  | 7.00   | 9.00   | 12.00  | 3.220 | 7.833   | 3.771   | 4.00  | 5.00  | 7.00   | 10.00  | 13.00  |
| 0.10 | 3.027 | 0.2591139 | 0.0188166 | 0.50 | 0.80 | 4.991   | 2.076   | 3.00  | 3.00  | 5.00   | 6.00   | 8.00   | 3.220 | 5.246   | 2.194   | 3.00  | 4.00  | 5.00   | 6.00   | 8.00   |
| 0.10 | 3.027 | 0.2591139 | 0.0188166 | 1.10 | 0.70 | 60.395  | 49.879  | 15.00 | 25.00 | 45.00  | 80.00  | 127.00 | 3.220 | 72.469  | 62.064  | 17.00 | 30.00 | 54.00  | 95.00  | 153.00 |
| 0.10 | 3.027 | 0.2591139 | 0.0188166 | 1.20 | 0.70 | 42.466  | 31.421  | 14.00 | 21.00 | 34.00  | 54.00  | 84.10  | 3.220 | 49.535  | 37.290  | 15.00 | 23.00 | 38.00  | 64.00  | 98.00  |
| 0.10 | 3.027 | 0.2591139 | 0.0188166 | 1.30 | 0.70 | 27.455  | 16.992  | 11.00 | 16.00 | 23.00  | 34.00  | 49.00  | 3.220 | 31.605  | 20.244  | 13.00 | 18.00 | 26.00  | 40.00  | 57.10  |
| 0.10 | 3.027 | 0.2591139 | 0.0188166 | 1.40 | 0.70 | 19.660  | 9.903   | 10.00 | 13.00 | 17.00  | 24.00  | 33.00  | 3.220 | 21.545  | 11.108  | 10.00 | 14.00 | 19.00  | 27.00  | 36.00  |
| 0.10 | 3.027 | 0.2591139 | 0.0188166 | 0.90 | 0.70 | 45.654  | 36.638  | 12.00 | 20.00 | 35.00  | 60.00  | 92.00  | 3.220 | 52.701  | 42.657  | 14.00 | 22.75 | 40.00  | 70.00  | 108.00 |
| 0.10 | 3.027 | 0.2591139 | 0.0188166 | 0.80 | 0.70 | 22.799  | 15.420  | 8.00  | 12.00 | 19.00  | 29.00  | 43.00  | 3.220 | 25.276  | 17.364  | 9.00  | 13.00 | 21.00  | 33.00  | 48.00  |
| 0.10 | 3.027 | 0.2591139 | 0.0188166 | 0.70 | 0.70 | 12.299  | 6.843   | 5.00  | 7.00  | 11.00  | 15.00  | 21.00  | 3.220 | 12.994  | 7.324   | 6.00  | 8.00  | 11.00  | 16.00  | 22.00  |
| 0.10 | 3.027 | 0.2591139 | 0.0188166 | 0.60 | 0.70 | 7.508   | 3.628   | 4.00  | 5.00  | 7.00   | 9.00   | 12.00  | 3.220 | 7.784   | 3.681   | 4.00  | 5.00  | 7.00   | 10.00  | 13.00  |
| 0.10 | 3.027 | 0.2591139 | 0.0188166 | 0.50 | 0.70 | 5.034   | 2.108   | 3.00  | 4.00  | 5.00   | 6.00   | 8.00   | 3.220 | 5.226   | 2.158   | 3.00  | 4.00  | 5.00   | 6.00   | 8.00   |
| 0.10 | 3.027 | 0.2591139 | 0.0188166 | 1.10 | 0.60 | 33.384  | 23.738  | 11.00 | 17.00 | 27.00  | 43.00  | 64.00  | 3.220 | 37.449  | 26.798  | 12.00 | 18.00 | 30.00  | 48.00  | 72.00  |
| 0.10 | 3.027 | 0.2591139 | 0.0188166 | 1.20 | 0.60 | 28.806  | 19.109  | 11.00 | 15.00 | 24.00  | 36.00  | 54.00  | 3.220 | 31.987  | 21.627  | 12.00 | 17.00 | 26.00  | 41.00  | 60.00  |
| 0.10 | 3.027 | 0.2591139 | 0.0188166 | 1.30 | 0.60 | 22.442  | 12.754  | 10.00 | 14.00 | 19.00  | 28.00  | 39.00  | 3.220 | 25.336  | 14.538  | 11.00 | 15.00 | 22.00  | 32.00  | 44.00  |
| 0.10 | 3.027 | 0.2591139 | 0.0188166 | 1.40 | 0.60 | 17.682  | 8.374   | 9.00  | 12.00 | 16.00  | 22.00  | 29.00  | 3.220 | 19.440  | 9.554   | 10.00 | 13.00 | 17.00  | 24.00  | 32.00  |
| 0.10 | 3.027 | 0.2591139 | 0.0188166 | 0.90 | 0.60 | 29.188  | 20.150  | 10.00 | 15.00 | 24.00  | 38.00  | 55.00  | 3.220 | 33.160  | 23.540  | 11.00 | 17.00 | 27.00  | 43.00  | 64.00  |
| 0.10 | 3.027 | 0.2591139 | 0.0188166 | 0.80 | 0.60 | 19.476  | 11.817  | 8.00  | 11.00 | 17.00  | 25.00  | 35.00  | 3.220 | 21.203  | 13.157  | 8.00  | 12.00 | 18.00  | 27.00  | 38.00  |
| 0.10 | 3.027 | 0.2591139 | 0.0188166 | 0.70 | 0.60 | 11.742  | 6.245   | 5.00  | 7.00  | 10.00  | 15.00  | 20.00  | 3.220 | 12.515  | 6.766   | 6.00  | 8.00  | 11.00  | 16.00  | 21.00  |
| 0.10 | 3.027 | 0.2591139 | 0.0188166 | 0.60 | 0.60 | 7.360   | 3.413   | 4.00  | 5.00  | 7.00   | 9.00   | 12.00  | 3.220 | 7.844   | 3.725   | 4.00  | 5.00  | 7.00   | 10.00  | 13.00  |
| 0.10 | 3.027 | 0.2591139 | 0.0188166 | 0.50 | 0.60 | 5.035   | 2.100   | 3.00  | 4.00  | 5.00   | 6.00   | 8.00   | 3.220 | 5.206   | 2.138   | 3.00  | 4.00  | 5.00   | 6.00   | 8.00   |
| 0.10 | 3.027 | 0.2591139 | 0.0188166 | 1.10 | 0.50 | 19.481  | 11.165  | 9.00  | 12.00 | 17.00  | 24.00  | 34.00  | 3.220 | 21.175  | 12.256  | 9.00  | 12.00 | 18.00  | 26.00  | 37.00  |
| 0.10 | 3.027 | 0.2591139 | 0.0188166 | 1.20 | 0.50 | 18.363  | 9.925   | 8.00  | 11.00 | 16.00  | 23.00  | 31.00  | 3.220 | 20.410  | 11.413  | 9.00  | 12.00 | 18.00  | 25.00  | 35.00  |
| 0.10 | 3.027 | 0.2591139 | 0.0188166 | 1.30 | 0.50 | 16.889  | 8.432   | 8.00  | 11.00 | 15.00  | 21.00  | 28.00  | 3.220 | 18.338  | 9.111   | 9.00  | 12.00 | 16.00  | 23.00  | 30.00  |
| 0.10 | 3.027 | 0.2591139 | 0.0188166 | 1.40 | 0.50 | 14.653  | 6.363   | 8.00  | 10.00 | 13.00  | 18.00  | 23.00  | 3.220 | 16.075  | 7.215   | 9.00  | 11.00 | 15.00  | 20.00  | 25.00  |
| 0.10 | 3.027 | 0.2591139 | 0.0188166 | 0.90 | 0.50 | 18.390  | 10.323  | 8.00  | 11.00 | 16.00  | 23.00  | 32.00  | 3.220 | 20.273  | 11.663  | 9.00  | 12.00 | 17.00  | 26.00  | 36.00  |
| 0.10 | 3.027 | 0.2591139 | 0.0188166 | 0.80 | 0.50 | 14.889  | 7.887   | 7.00  | 9.00  | 13.00  | 18.00  | 25.00  | 3.220 | 16.421  | 8.793   | 8.00  | 10.00 | 14.00  | 21.00  | 28.00  |
| 0.10 | 3.027 | 0.2591139 | 0.0188166 | 0.70 | 0.50 | 10.584  | 5.208   | 5.00  | 7.00  | 9.00   | 13.00  | 17.00  | 3.220 | 11.434  | 5.513   | 6.00  | 7.00  | 10.00  | 1      |        |

|      |       |           |           |      |      |         |         |       |        |        |        |         |       |         |         |       |        |        |         |         |
|------|-------|-----------|-----------|------|------|---------|---------|-------|--------|--------|--------|---------|-------|---------|---------|-------|--------|--------|---------|---------|
| 0.15 | 3.238 | 0.3214631 | 0.0286840 | 1.40 | 1.10 | 27.818  | 18.993  | 10.00 | 15.00  | 22.00  | 35.00  | 53.00   | 3.424 | 32.477  | 23.393  | 11.00 | 16.00  | 26.00  | 41.00   | 62.00   |
| 0.15 | 3.238 | 0.3214631 | 0.0286840 | 0.90 | 1.10 | 102.755 | 96.562  | 16.00 | 34.00  | 73.00  | 141.00 | 227.00  | 3.424 | 123.416 | 115.088 | 19.00 | 41.00  | 89.00  | 170.00  | 273.00  |
| 0.15 | 3.238 | 0.3214631 | 0.0286840 | 0.80 | 1.10 | 29.017  | 23.433  | 8.00  | 12.00  | 22.00  | 39.00  | 60.00   | 3.424 | 32.702  | 26.344  | 8.00  | 14.00  | 25.00  | 43.00   | 68.00   |
| 0.15 | 3.238 | 0.3214631 | 0.0286840 | 0.70 | 1.10 | 12.617  | 8.147   | 5.00  | 7.00   | 11.00  | 16.00  | 23.00   | 3.424 | 13.460  | 8.983   | 5.00  | 7.00   | 11.00  | 17.00   | 25.00   |
| 0.15 | 3.238 | 0.3214631 | 0.0286840 | 0.60 | 1.10 | 7.163   | 3.933   | 3.00  | 4.00   | 6.00   | 9.00   | 12.00   | 3.424 | 7.488   | 4.057   | 3.00  | 5.00   | 7.00   | 9.00    | 13.00   |
| 0.15 | 3.238 | 0.3214631 | 0.0286840 | 0.50 | 1.10 | 4.631   | 2.150   | 2.00  | 3.00   | 4.00   | 6.00   | 7.00    | 3.424 | 4.857   | 2.281   | 2.00  | 3.00   | 4.00   | 6.00    | 8.00    |
| 0.15 | 3.238 | 0.3214631 | 0.0286840 | 1.10 | 1.20 | 488.620 | 488.059 | 57.00 | 144.00 | 334.00 | 677.00 | 1114.00 | 3.424 | 712.133 | 705.086 | 84.00 | 212.00 | 497.00 | 976.25  | 1612.20 |
| 0.15 | 3.238 | 0.3214631 | 0.0286840 | 1.20 | 1.20 | 130.302 | 117.815 | 24.00 | 46.00  | 94.00  | 177.00 | 286.00  | 3.424 | 172.997 | 162.705 | 28.00 | 57.00  | 123.00 | 236.00  | 385.00  |
| 0.15 | 3.238 | 0.3214631 | 0.0286840 | 1.30 | 1.20 | 51.725  | 41.759  | 14.00 | 22.00  | 40.00  | 67.00  | 105.00  | 3.424 | 63.894  | 53.260  | 16.00 | 26.00  | 48.00  | 85.00   | 133.00  |
| 0.15 | 3.238 | 0.3214631 | 0.0286840 | 1.40 | 1.20 | 28.218  | 19.172  | 10.00 | 15.00  | 23.00  | 36.00  | 54.00   | 3.424 | 32.149  | 22.528  | 11.00 | 16.00  | 26.00  | 41.00   | 61.00   |
| 0.15 | 3.238 | 0.3214631 | 0.0286840 | 0.90 | 1.20 | 108.136 | 101.188 | 17.00 | 35.00  | 77.00  | 148.00 | 240.10  | 3.424 | 126.820 | 122.411 | 20.00 | 41.00  | 87.00  | 173.00  | 284.00  |
| 0.15 | 3.238 | 0.3214631 | 0.0286840 | 0.80 | 1.20 | 29.527  | 24.200  | 8.00  | 13.00  | 23.00  | 39.00  | 61.00   | 3.424 | 32.558  | 26.694  | 8.00  | 14.00  | 25.00  | 43.00   | 68.00   |
| 0.15 | 3.238 | 0.3214631 | 0.0286840 | 0.70 | 1.20 | 12.611  | 8.155   | 5.00  | 7.00   | 11.00  | 16.00  | 23.00   | 3.424 | 13.611  | 9.051   | 5.00  | 7.00   | 11.00  | 17.00   | 26.00   |
| 0.15 | 3.238 | 0.3214631 | 0.0286840 | 0.60 | 1.20 | 7.138   | 3.900   | 3.00  | 4.00   | 6.00   | 9.00   | 12.00   | 3.424 | 7.438   | 4.054   | 3.00  | 5.00   | 7.00   | 9.00    | 13.00   |
| 0.15 | 3.238 | 0.3214631 | 0.0286840 | 0.50 | 1.20 | 4.615   | 2.162   | 2.00  | 3.00   | 4.00   | 6.00   | 7.00    | 3.424 | 4.853   | 2.243   | 2.00  | 3.00   | 4.00   | 6.00    | 8.00    |
| 0.15 | 3.238 | 0.3214631 | 0.0286840 | 1.10 | 1.30 | 504.331 | 488.493 | 63.00 | 151.75 | 353.00 | 706.00 | 1141.10 | 3.424 | 767.369 | 756.971 | 87.00 | 222.00 | 530.00 | 1065.00 | 1769.10 |
| 0.15 | 3.238 | 0.3214631 | 0.0286840 | 1.20 | 1.30 | 133.915 | 124.086 | 23.00 | 45.00  | 96.00  | 184.00 | 297.00  | 3.424 | 178.747 | 168.220 | 28.00 | 59.00  | 127.00 | 241.25  | 405.00  |
| 0.15 | 3.238 | 0.3214631 | 0.0286840 | 1.30 | 1.30 | 52.224  | 42.603  | 14.00 | 22.00  | 39.00  | 69.00  | 108.00  | 3.424 | 64.182  | 54.183  | 16.00 | 27.00  | 47.00  | 84.00   | 133.00  |
| 0.15 | 3.238 | 0.3214631 | 0.0286840 | 1.40 | 1.30 | 28.507  | 19.661  | 10.00 | 15.00  | 23.00  | 36.00  | 54.00   | 3.424 | 32.628  | 22.924  | 12.00 | 16.00  | 26.00  | 42.00   | 63.00   |
| 0.15 | 3.238 | 0.3214631 | 0.0286840 | 0.90 | 1.30 | 108.094 | 102.226 | 17.00 | 35.00  | 76.00  | 147.00 | 239.00  | 3.424 | 130.525 | 123.696 | 20.00 | 43.00  | 92.00  | 179.00  | 294.00  |
| 0.15 | 3.238 | 0.3214631 | 0.0286840 | 0.80 | 1.30 | 29.175  | 23.698  | 7.90  | 13.00  | 22.00  | 39.00  | 60.00   | 3.424 | 32.846  | 26.661  | 8.00  | 14.00  | 25.00  | 43.00   | 68.00   |
| 0.15 | 3.238 | 0.3214631 | 0.0286840 | 0.70 | 1.30 | 12.618  | 8.266   | 5.00  | 7.00   | 10.00  | 16.00  | 23.00   | 3.424 | 13.615  | 9.069   | 5.00  | 7.00   | 11.00  | 18.00   | 25.00   |
| 0.15 | 3.238 | 0.3214631 | 0.0286840 | 0.60 | 1.30 | 7.140   | 3.867   | 3.00  | 4.00   | 6.00   | 9.00   | 12.00   | 3.424 | 7.456   | 4.055   | 3.00  | 5.00   | 7.00   | 9.00    | 13.00   |
| 0.15 | 3.238 | 0.3214631 | 0.0286840 | 0.50 | 1.30 | 4.617   | 2.150   | 2.00  | 3.00   | 4.00   | 6.00   | 7.00    | 3.424 | 4.828   | 2.230   | 2.00  | 3.00   | 4.00   | 6.00    | 8.00    |
| 0.15 | 3.238 | 0.3214631 | 0.0286840 | 1.10 | 1.40 | 533.043 | 538.144 | 64.00 | 157.00 | 368.00 | 718.00 | 1223.10 | 3.424 | 794.219 | 788.604 | 94.00 | 232.00 | 553.00 | 1093.00 | 1808.00 |
| 0.15 | 3.238 | 0.3214631 | 0.0286840 | 1.20 | 1.40 | 133.937 | 123.564 | 24.00 | 47.00  | 96.00  | 180.00 | 292.10  | 3.424 | 179.390 | 166.524 | 29.00 | 59.00  | 129.00 | 246.00  | 393.00  |
| 0.15 | 3.238 | 0.3214631 | 0.0286840 | 1.30 | 1.40 | 52.327  | 42.169  | 14.00 | 23.00  | 40.00  | 69.00  | 106.00  | 3.424 | 64.012  | 53.493  | 16.00 | 27.00  | 48.00  | 84.00   | 133.00  |
| 0.15 | 3.238 | 0.3214631 | 0.0286840 | 1.40 | 1.40 | 28.238  | 19.241  | 11.00 | 15.00  | 23.00  | 36.00  | 53.00   | 3.424 | 32.690  | 23.333  | 11.00 | 16.00  | 26.00  | 42.00   | 62.00   |
| 0.15 | 3.238 | 0.3214631 | 0.0286840 | 0.90 | 1.40 | 108.509 | 102.701 | 17.00 | 36.00  | 78.00  | 148.00 | 243.00  | 3.424 | 129.864 | 123.816 | 19.00 | 41.00  | 93.00  | 177.00  | 290.00  |
| 0.15 | 3.238 | 0.3214631 | 0.0286840 | 0.80 | 1.40 | 29.088  | 23.326  | 7.00  | 13.00  | 22.00  | 39.00  | 59.00   | 3.424 | 32.737  | 26.714  | 8.00  | 14.00  | 25.00  | 43.00   | 68.00   |
| 0.15 | 3.238 | 0.3214631 | 0.0286840 | 0.70 | 1.40 | 12.626  | 8.360   | 5.00  | 7.00   | 10.00  | 16.00  | 24.00   | 3.424 | 13.549  | 8.842   | 5.00  | 7.00   | 11.00  | 18.00   | 25.00   |
| 0.15 | 3.238 | 0.3214631 | 0.0286840 | 0.60 | 1.40 | 7.101   | 3.818   | 3.00  | 4.00   | 6.00   | 9.00   | 12.00   | 3.424 | 7.524   | 4.138   | 3.00  | 5.00   | 7.00   | 9.00    | 13.00   |
| 0.15 | 3.238 | 0.3214631 | 0.0286840 | 0.50 | 1.40 | 4.672   | 2.190   | 2.00  | 3.00   | 4.00   | 6.00   | 8.00    | 3.424 | 4.853   | 2.247   | 2.00  | 3.00   | 4.00   | 6.00    | 8.00    |
| 0.15 | 3.238 | 0.3214631 | 0.0286840 | 1.10 | 0.90 | 234.240 | 228.013 | 32.00 | 73.75  | 162.20 | 320.25 | 527.10  | 3.424 | 317.329 | 308.769 | 40.00 | 97.00  | 225.50 | 437.00  | 710.00  |
| 0.15 | 3.238 | 0.3214631 | 0.0286840 | 1.20 | 0.90 | 106.846 | 97.119  | 20.00 | 38.00  | 77.00  | 145.00 | 234.00  | 3.424 | 140.183 | 131.051 | 24.00 | 47.00  | 101.00 | 189.00  | 310.00  |
| 0.15 | 3.238 | 0.3214631 | 0.0286840 | 1.30 | 0.90 | 48.227  | 38.121  | 13.00 | 21.00  | 37.00  | 64.00  | 97.00   | 3.424 | 58.830  | 48.676  | 15.00 | 25.00  | 44.00  | 78.00   | 122.10  |
| 0.15 | 3.238 | 0.3214631 | 0.0286840 | 1.40 | 0.90 | 26.946  | 17.939  | 10.00 | 14.00  | 22.00  | 34.00  | 51.00   | 3.424 | 32.154  | 22.408  | 11.00 | 16.00  | 26.00  | 41.00   | 62.00   |
| 0.15 | 3.238 | 0.3214631 | 0.0286840 | 0.90 | 0.90 | 87.272  | 81.237  | 15.00 | 30.00  | 62.00  | 119.00 | 193.00  | 3.424 | 106.078 | 100.647 | 17.00 | 35.00  | 75.00  | 146.00  | 237.00  |
| 0.15 | 3.238 | 0.3214631 | 0.0286840 | 0.80 | 0.90 | 27.760  | 21.891  | 7.00  | 12.00  | 22.00  | 36.00  | 57.00   | 3.424 | 31.619  | 25.743  | 8.00  | 14.00  | 24.00  | 42.00   | 65.00   |
| 0.15 | 3.238 | 0.3214631 | 0.0286840 | 0.70 | 0.90 | 12.448  | 8.109   | 4.00  | 7.00   | 10.00  | 16.00  | 23.00   | 3.424 | 13.426  | 8.856   | 5.00  | 7.00   | 11.00  | 17.00   | 25.00   |
| 0.15 | 3.238 | 0.3214631 | 0.0286840 | 0.60 | 0.90 | 7.117   | 3.886   | 3.00  | 4.00   | 6.00   | 9.00   | 12.00   | 3.424 | 7.421   | 3.958   | 3.00  | 5.00   | 7.00   | 9.00    | 13.00   |
| 0.15 | 3.238 | 0.3214631 | 0.0286840 | 0.50 | 0.90 | 4.602   | 2.148   | 2.00  | 3.00   | 4.00   | 6.00   | 7.00    | 3.424 | 4.811   | 2.241   | 2.00  | 3.00   | 4.00   | 6.00    | 8.00    |
| 0.15 | 3.238 | 0.3214631 | 0.0286840 | 1.10 | 0.80 | 147.049 | 142.325 | 22.00 | 48.00  | 104.00 | 195.00 | 326.00  | 3.424 | 183.196 | 174.491 | 28.00 | 59.00  | 130.00 | 249.00  | 410.10  |
| 0.15 | 3.238 | 0.3214631 | 0.0286840 | 1.20 | 0.80 | 82.498  | 73.709  | 16.00 | 31.00  | 60.00  | 110.00 | 177.00  | 3.424 | 106.061 | 98.298  | 19.00 | 37.00  | 76.00  | 143.00  | 231.00  |
| 0.15 | 3.238 | 0.3214631 | 0.0286840 | 1.30 | 0.80 | 43.586  | 34.513  | 12.00 | 19.00  | 34.00  | 57.00  | 89.00   | 3.424 | 53.273  | 42.569  | 14.00 | 23.00  | 41.00  | 70.00   | 110.00  |
| 0.15 | 3.238 | 0.3214631 | 0.0286840 | 1.40 | 0.80 | 26.030  | 17.430  | 10.00 | 14.00  | 21.00  | 33.00  | 49.00   | 3.424 | 30.283  | 20.913  | 11.00 | 16.00  | 24.00  | 39.00   | 58.00   |
| 0.15 | 3.238 | 0.3214631 | 0.0286840 | 0.90 | 0.80 | 72.981  | 66.512  | 13.00 | 26.00  | 53.00  | 98.00  | 158.00  | 3.424 | 85.581  | 78.586  | 15.00 | 30.00  | 62.00  | 115.00  | 188.00  |
| 0.15 | 3.238 | 0.3214631 | 0.0286840 | 0.80 | 0.80 | 26.481  | 20.650  | 7.00  | 12.00  | 20.00  | 35.00  | 53.10   | 3.424 | 30.028  | 23.946  | 8.00  | 13.00  | 23.00  | 40.00   | 61.00   |
| 0.15 | 3.238 | 0.3214631 | 0.0286840 | 0.70 | 0.80 | 12.375  | 8.221   | 5.00  | 7.00   | 10.00  | 16.00  | 23.00   | 3.424 | 13.266  | 8.533   | 5.00  | 7.00   | 11.00  | 17.00   | 24.00   |
| 0.15 | 3.238 | 0.3214631 | 0.0286840 | 0.60 | 0.80 | 7.144   | 3.958   | 3.00  | 4.00   | 6.00   | 9.00   | 12.00   | 3.424 | 7.489   | 4.010   | 3.00  | 5.00   | 7.00   | 9.00    | 13.00   |
| 0.15 | 3.238 | 0.3214631 | 0.0286840 | 0.50 | 0.80 | 4.638   | 2.190   | 2.00  | 3.00   | 4.00   | 6.00   | 8.00    | 3.424 | 4.829   | 2.289   | 2.00  | 3.00   | 4.00   | 6.00    | 8.00    |
| 0.15 | 3.238 | 0.3214631 | 0.0286840 | 1.10 | 0.70 | 78.033  | 71.107  | 15.00 | 28.00  | 56.00  | 105.00 | 172.00  | 3.424 | 97.650  | 88.241  | 18.00 | 35.00  | 71.00  | 132.00  | 213.00  |
| 0.15 | 3.238 | 0.3214631 | 0.0286840 | 1.20 | 0.70 | 56.685  | 48.184  | 13.00 | 23.00  | 42.00  | 75.00  | 119.00  | 3.424 | 71.800  | 62.616  | 16.00 | 28.00  | 53.00  | 96.00   | 151.00  |
| 0.15 | 3.238 | 0.3214631 | 0.0286840 | 1.30 | 0.70 | 37.195  | 28.925  | 11.00 | 17.00  | 29.00  | 48.00  | 75.00   | 3.424 | 44.859  | 35.413  | 13.00 | 20.00  | 34.00  | 58.00   | 91.00   |
| 0.15 | 3.238 | 0.3214631 | 0.0286840 | 1.40 | 0.70 | 24.134  | 15.756  | 9.00  | 13.00  | 20.00  | 31.00  | 45.00   | 3.424 | 28.067  | 18.756  | 10.00 | 15.00  | 23.00  | 36.00   | 53.00   |

|      |       |           |           |      |      |        |        |       |       |       |       |       |       |        |        |       |       |       |       |       |
|------|-------|-----------|-----------|------|------|--------|--------|-------|-------|-------|-------|-------|-------|--------|--------|-------|-------|-------|-------|-------|
| 0.15 | 3.238 | 0.3214631 | 0.0286840 | 1.30 | 0.60 | 27.853 | 19.453 | 10.00 | 14.00 | 22.00 | 36.00 | 53.00 | 3.424 | 32.785 | 23.919 | 11.00 | 16.00 | 26.00 | 43.00 | 65.00 |
| 0.15 | 3.238 | 0.3214631 | 0.0286840 | 1.40 | 0.60 | 20.854 | 12.900 | 9.00  | 12.00 | 17.00 | 26.00 | 37.00 | 3.424 | 23.617 | 15.409 | 9.00  | 13.00 | 20.00 | 30.00 | 43.00 |
| 0.15 | 3.238 | 0.3214631 | 0.0286840 | 0.90 | 0.60 | 34.277 | 27.184 | 9.00  | 15.00 | 26.00 | 45.00 | 69.00 | 3.424 | 38.531 | 31.427 | 10.00 | 16.00 | 30.00 | 50.00 | 78.10 |
| 0.15 | 3.238 | 0.3214631 | 0.0286840 | 0.80 | 0.60 | 20.110 | 14.459 | 7.00  | 10.00 | 16.00 | 26.00 | 39.00 | 3.424 | 22.858 | 16.258 | 7.00  | 11.00 | 18.00 | 30.00 | 44.00 |
| 0.15 | 3.238 | 0.3214631 | 0.0286840 | 0.70 | 0.60 | 11.462 | 7.035  | 5.00  | 7.00  | 10.00 | 15.00 | 21.00 | 3.424 | 12.450 | 7.703  | 5.00  | 7.00  | 11.00 | 16.00 | 22.00 |
| 0.15 | 3.238 | 0.3214631 | 0.0286840 | 0.60 | 0.60 | 6.967  | 3.686  | 3.00  | 4.00  | 6.00  | 9.00  | 12.00 | 3.424 | 7.338  | 3.943  | 3.00  | 5.00  | 6.00  | 9.00  | 13.00 |
| 0.15 | 3.238 | 0.3214631 | 0.0286840 | 0.50 | 0.60 | 4.576  | 2.113  | 2.00  | 3.00  | 4.00  | 6.00  | 7.00  | 3.424 | 4.749  | 2.188  | 2.00  | 3.00  | 4.00  | 6.00  | 8.00  |
| 0.15 | 3.238 | 0.3214631 | 0.0286840 | 1.10 | 0.50 | 21.814 | 14.678 | 8.00  | 11.00 | 18.00 | 28.00 | 41.00 | 3.424 | 24.777 | 17.327 | 9.00  | 13.00 | 20.00 | 32.00 | 47.00 |
| 0.15 | 3.238 | 0.3214631 | 0.0286840 | 1.20 | 0.50 | 20.942 | 13.967 | 8.00  | 11.00 | 17.00 | 27.00 | 39.00 | 3.424 | 23.718 | 16.104 | 9.00  | 12.00 | 19.00 | 31.00 | 45.00 |
| 0.15 | 3.238 | 0.3214631 | 0.0286840 | 1.30 | 0.50 | 19.004 | 11.721 | 8.00  | 11.00 | 16.00 | 24.00 | 34.00 | 3.424 | 21.052 | 13.154 | 8.00  | 12.00 | 18.00 | 27.00 | 39.00 |
| 0.15 | 3.238 | 0.3214631 | 0.0286840 | 1.40 | 0.50 | 16.388 | 9.039  | 7.00  | 10.00 | 14.00 | 20.00 | 28.00 | 3.424 | 18.126 | 10.238 | 8.00  | 11.00 | 16.00 | 23.00 | 31.00 |
| 0.15 | 3.238 | 0.3214631 | 0.0286840 | 0.90 | 0.50 | 20.244 | 13.627 | 7.00  | 11.00 | 17.00 | 26.00 | 38.00 | 3.424 | 22.899 | 15.352 | 8.00  | 12.00 | 19.00 | 29.00 | 44.00 |
| 0.15 | 3.238 | 0.3214631 | 0.0286840 | 0.80 | 0.50 | 15.804 | 9.951  | 6.00  | 9.00  | 13.00 | 20.00 | 29.00 | 3.424 | 17.419 | 11.076 | 7.00  | 10.00 | 15.00 | 22.00 | 32.00 |
| 0.15 | 3.238 | 0.3214631 | 0.0286840 | 0.70 | 0.50 | 10.470 | 5.726  | 5.00  | 6.00  | 9.00  | 13.00 | 18.00 | 3.424 | 11.109 | 6.289  | 5.00  | 7.00  | 10.00 | 14.00 | 20.00 |
| 0.15 | 3.238 | 0.3214631 | 0.0286840 | 0.60 | 0.50 | 6.854  | 3.441  | 3.00  | 4.00  | 6.00  | 8.00  | 11.00 | 3.424 | 7.109  | 3.553  | 3.00  | 5.00  | 6.00  | 9.00  | 12.00 |
| 0.15 | 3.238 | 0.3214631 | 0.0286840 | 0.50 | 0.50 | 4.609  | 2.086  | 2.00  | 3.00  | 4.00  | 6.00  | 7.00  | 3.424 | 4.770  | 2.146  | 2.00  | 3.00  | 4.00  | 6.00  | 8.00  |

TABLE S.5. ARL Results of the Max-EWMA control chart when pure shift occurs in the shape1 parameter of beta distribution ( $\Delta_\gamma \in (1.0, 1.1, 1.2, 1.3, 1.4, 0.9, 0.8, 0.7, 0.6, 0.5)$ ,  $\Delta_\lambda = 1.0$ ) when  $X \sim B(\gamma, \delta)$ ,  $T \sim UNH(\alpha, \lambda)$ ,  $\mu = 0.20$ ,  $\alpha_0 = 1.50$ ,  $\lambda_0 = 1.00$ ,  $ARL_0 \in (370, 500)$  and  $\theta_e \in (0.05, 0.10, 0.15)$

| $\theta_e$                   | $K$   | $EM$      | $VM$      | $\Delta_\gamma$ | $\Delta_\lambda$ | $ARL$         | $SDRL$  | $q10$ | $q25$  | $q50$  | $q75$  | $q90$         | $K$   | $ARL$   | $SDRL$  | $q10$ | $q25$  | $q50$  | $q75$  | $q90$   |  |
|------------------------------|-------|-----------|-----------|-----------------|------------------|---------------|---------|-------|--------|--------|--------|---------------|-------|---------|---------|-------|--------|--------|--------|---------|--|
|                              |       |           |           |                 |                  | $ARL_0 = 370$ |         |       |        |        |        | $ARL_0 = 500$ |       |         |         |       |        |        |        |         |  |
| <b>Case 1</b>                |       |           |           |                 |                  |               |         |       |        |        |        |               |       |         |         |       |        |        |        |         |  |
| <b><math>\phi=290</math></b> |       |           |           |                 |                  |               |         |       |        |        |        |               |       |         |         |       |        |        |        |         |  |
| 0.05                         | 2.687 | 0.1808245 | 0.0092612 | 1.00            | 1.00             | 370.125       | 351.717 | 53.00 | 117.00 | 263.00 | 512.25 | 821.00        | 2.887 | 500.934 | 478.084 | 67.00 | 160.00 | 356.00 | 695.00 | 1128.00 |  |
| 0.05                         | 2.687 | 0.1808245 | 0.0092612 | 1.10            | 1.00             | 20.395        | 9.863   | 10.00 | 13.00  | 18.00  | 25.00  | 34.00         | 2.887 | 21.723  | 10.641  | 11.00 | 14.00  | 19.00  | 27.00  | 35.00   |  |
| 0.05                         | 2.687 | 0.1808245 | 0.0092612 | 1.20            | 1.00             | 8.768         | 2.798   | 6.00  | 7.00   | 8.00   | 10.00  | 12.00         | 2.887 | 9.140   | 2.893   | 6.00  | 7.00   | 9.00   | 11.00  | 13.00   |  |
| 0.05                         | 2.687 | 0.1808245 | 0.0092612 | 1.30            | 1.00             | 5.754         | 1.473   | 4.00  | 5.00   | 6.00   | 7.00   | 8.00          | 2.887 | 5.949   | 1.502   | 4.00  | 5.00   | 6.00   | 7.00   | 8.00    |  |
| 0.05                         | 2.687 | 0.1808245 | 0.0092612 | 1.40            | 1.00             | 4.322         | 0.966   | 3.00  | 4.00   | 4.00   | 5.00   | 6.00          | 2.887 | 4.516   | 0.988   | 3.00  | 4.00   | 4.00   | 5.00   | 6.00    |  |
| 0.05                         | 2.687 | 0.1808245 | 0.0092612 | 0.90            | 1.00             | 19.304        | 8.845   | 10.00 | 13.00  | 17.00  | 24.00  | 31.00         | 2.887 | 20.772  | 9.654   | 11.00 | 14.00  | 19.00  | 25.00  | 33.00   |  |
| 0.05                         | 2.687 | 0.1808245 | 0.0092612 | 0.80            | 1.00             | 7.940         | 2.198   | 5.00  | 6.00   | 8.00   | 9.00   | 11.00         | 2.887 | 8.284   | 2.322   | 6.00  | 7.00   | 8.00   | 10.00  | 11.00   |  |
| 0.05                         | 2.687 | 0.1808245 | 0.0092612 | 0.70            | 1.00             | 5.008         | 1.065   | 4.00  | 4.00   | 5.00   | 6.00   | 6.00          | 2.887 | 5.218   | 1.093   | 4.00  | 4.00   | 5.00   | 6.00   | 7.00    |  |
| 0.05                         | 2.687 | 0.1808245 | 0.0092612 | 0.60            | 1.00             | 3.671         | 0.657   | 3.00  | 3.00   | 4.00   | 4.00   | 4.00          | 2.887 | 3.819   | 0.683   | 3.00  | 3.00   | 4.00   | 4.00   | 5.00    |  |
| 0.05                         | 2.687 | 0.1808245 | 0.0092612 | 0.50            | 1.00             | 2.965         | 0.434   | 2.00  | 3.00   | 3.00   | 3.00   | 3.00          | 2.887 | 3.069   | 0.410   | 3.00  | 3.00   | 3.00   | 3.00   | 4.00    |  |
| 0.10                         | 2.988 | 0.2588680 | 0.0188363 | 1.00            | 1.00             | 370.022       | 359.925 | 45.00 | 111.00 | 256.50 | 507.00 | 845.00        | 3.162 | 501.845 | 494.182 | 65.00 | 154.00 | 350.00 | 700.00 | 1126.00 |  |
| 0.10                         | 2.988 | 0.2588680 | 0.0188363 | 1.10            | 1.00             | 20.124        | 12.467  | 8.00  | 11.00  | 17.00  | 25.00  | 36.00         | 3.162 | 21.680  | 13.436  | 9.00  | 12.00  | 18.00  | 27.00  | 39.00   |  |
| 0.10                         | 2.988 | 0.2588680 | 0.0188363 | 1.20            | 1.00             | 7.546         | 2.975   | 4.00  | 5.00   | 7.00   | 9.00   | 11.00         | 3.162 | 7.900   | 3.101   | 5.00  | 6.00   | 7.00   | 9.00   | 12.00   |  |
| 0.10                         | 2.988 | 0.2588680 | 0.0188363 | 1.30            | 1.00             | 4.702         | 1.427   | 3.00  | 4.00   | 4.00   | 5.00   | 7.00          | 3.162 | 4.896   | 1.475   | 3.00  | 4.00   | 5.00   | 6.00   | 7.00    |  |
| 0.10                         | 2.988 | 0.2588680 | 0.0188363 | 1.40            | 1.00             | 3.553         | 0.926   | 3.00  | 3.00   | 3.00   | 4.00   | 5.00          | 3.162 | 3.658   | 0.933   | 3.00  | 3.00   | 4.00   | 4.00   | 5.00    |  |
| 0.10                         | 2.988 | 0.2588680 | 0.0188363 | 0.90            | 1.00             | 19.213        | 11.181  | 8.00  | 11.00  | 17.00  | 24.00  | 34.00         | 3.162 | 20.708  | 12.306  | 9.00  | 12.00  | 18.00  | 26.00  | 36.00   |  |
| 0.10                         | 2.988 | 0.2588680 | 0.0188363 | 0.80            | 1.00             | 6.704         | 2.303   | 4.00  | 5.00   | 6.00   | 8.00   | 10.00         | 3.162 | 7.071   | 2.402   | 4.00  | 5.00   | 7.00   | 8.00   | 10.00   |  |
| 0.10                         | 2.988 | 0.2588680 | 0.0188363 | 0.70            | 1.00             | 4.104         | 1.042   | 3.00  | 3.00   | 4.00   | 5.00   | 5.00          | 3.162 | 4.250   | 1.062   | 3.00  | 4.00   | 4.00   | 5.00   | 6.00    |  |
| 0.10                         | 2.988 | 0.2588680 | 0.0188363 | 0.60            | 1.00             | 2.980         | 0.620   | 2.00  | 3.00   | 3.00   | 3.00   | 4.00          | 3.162 | 3.083   | 0.616   | 2.00  | 3.00   | 3.00   | 3.00   | 4.00    |  |
| 0.10                         | 2.988 | 0.2588680 | 0.0188363 | 0.50            | 1.00             | 2.318         | 0.474   | 2.00  | 2.00   | 2.00   | 3.00   | 3.00          | 3.162 | 2.401   | 0.506   | 2.00  | 2.00   | 2.00   | 3.00   | 3.00    |  |
| 0.15                         | 3.105 | 0.3220389 | 0.0289256 | 1.00            | 1.00             | 370.360       | 360.606 | 44.00 | 110.00 | 260.00 | 512.00 | 851.00        | 3.267 | 500.683 | 496.854 | 56.00 | 149.00 | 351.00 | 691.00 | 1143.00 |  |
| 0.15                         | 3.105 | 0.3220389 | 0.0289256 | 1.10            | 1.00             | 21.341        | 15.086  | 7.00  | 11.00  | 17.00  | 28.00  | 41.00         | 3.267 | 23.363  | 16.725  | 8.00  | 12.00  | 19.00  | 30.00  | 45.00   |  |
| 0.15                         | 3.105 | 0.3220389 | 0.0289256 | 1.20            | 1.00             | 7.090         | 3.213   | 4.00  | 5.00   | 6.00   | 9.00   | 11.00         | 3.267 | 7.474   | 3.417   | 4.00  | 5.00   | 7.00   | 9.00   | 12.00   |  |
| 0.15                         | 3.105 | 0.3220389 | 0.0289256 | 1.30            | 1.00             | 4.262         | 1.449   | 3.00  | 3.00   | 4.00   | 5.00   | 6.00          | 3.267 | 4.410   | 1.495   | 3.00  | 3.00   | 4.00   | 5.00   | 6.00    |  |
| 0.15                         | 3.105 | 0.3220389 | 0.0289256 | 1.40            | 1.00             | 3.162         | 0.917   | 2.00  | 3.00   | 3.00   | 4.00   | 4.00          | 3.267 | 3.257   | 0.939   | 2.00  | 3.00   | 3.00   | 4.00   | 4.00    |  |
| 0.15                         | 3.105 | 0.3220389 | 0.0289256 | 0.90            | 1.00             | 20.704        | 14.015  | 7.00  | 11.00  | 17.00  | 27.00  | 39.00         | 3.267 | 22.451  | 15.612  | 8.00  | 12.00  | 18.00  | 29.00  | 43.00   |  |
| 0.15                         | 3.105 | 0.3220389 | 0.0289256 | 0.80            | 1.00             | 6.276         | 2.458   | 4.00  | 5.00   | 6.00   | 7.00   | 9.00          | 3.267 | 6.594   | 2.636   | 4.00  | 5.00   | 6.00   | 8.00   | 10.00   |  |
| 0.15                         | 3.105 | 0.3220389 | 0.0289256 | 0.70            | 1.00             | 3.675         | 1.032   | 3.00  | 3.00   | 4.00   | 4.00   | 5.00          | 3.267 | 3.812   | 1.064   | 3.00  | 3.00   | 4.00   | 4.00   | 5.00    |  |
| 0.15                         | 3.105 | 0.3220389 | 0.0289256 | 0.60            | 1.00             | 2.620         | 0.628   | 2.00  | 2.00   | 3.00   | 3.00   | 3.00          | 3.267 | 2.705   | 0.643   | 2.00  | 2.00   | 3.00   | 3.00   | 3.00    |  |
| 0.15                         | 3.105 | 0.3220389 | 0.0289256 | 0.50            | 1.00             | 2.108         | 0.330   | 2.00  | 2.00   | 2.00   | 2.00   | 3.00          | 3.267 | 2.142   | 0.361   | 2.00  | 2.00   | 2.00   | 2.00   | 3.00    |  |

| Case 2     |       |           |           |      |      |         |         |       |        |        |        |        |       |         |         |       |        |        |        |         |
|------------|-------|-----------|-----------|------|------|---------|---------|-------|--------|--------|--------|--------|-------|---------|---------|-------|--------|--------|--------|---------|
| $\phi=148$ |       |           |           |      |      |         |         |       |        |        |        |        |       |         |         |       |        |        |        |         |
| 0.05       | 2.693 | 0.1815312 | 0.0092496 | 1.00 | 1.00 | 371.630 | 356.051 | 53.00 | 119.00 | 262.00 | 511.00 | 851.00 | 2.888 | 500.861 | 488.895 | 67.00 | 161.00 | 354.50 | 683.00 | 1124.00 |
| 0.05       | 2.693 | 0.1815312 | 0.0092496 | 1.10 | 1.00 | 33.221  | 20.100  | 14.00 | 19.00  | 28.00  | 42.00  | 59.00  | 2.888 | 35.863  | 21.669  | 14.00 | 21.00  | 31.00  | 45.00  | 64.00   |
| 0.05       | 2.693 | 0.1815312 | 0.0092496 | 1.20 | 1.00 | 13.089  | 5.173   | 7.00  | 9.00   | 12.00  | 16.00  | 20.00  | 2.888 | 13.853  | 5.392   | 8.00  | 10.00  | 13.00  | 17.00  | 21.00   |
| 0.05       | 2.693 | 0.1815312 | 0.0092496 | 1.30 | 1.00 | 8.226   | 2.544   | 5.00  | 6.00   | 8.00   | 10.00  | 12.00  | 2.888 | 8.622   | 2.643   | 6.00  | 7.00   | 8.00   | 10.00  | 12.00   |
| 0.05       | 2.693 | 0.1815312 | 0.0092496 | 1.40 | 1.00 | 6.120   | 1.628   | 4.00  | 5.00   | 6.00   | 7.00   | 8.00   | 2.888 | 6.395   | 1.671   | 4.00  | 5.00   | 6.00   | 7.00   | 9.00    |
| 0.05       | 2.693 | 0.1815312 | 0.0092496 | 0.90 | 1.00 | 31.575  | 17.732  | 14.00 | 19.00  | 27.00  | 40.00  | 54.00  | 2.888 | 34.291  | 19.703  | 15.00 | 21.00  | 29.00  | 42.25  | 60.00   |
| 0.05       | 2.693 | 0.1815312 | 0.0092496 | 0.80 | 1.00 | 11.837  | 4.015   | 7.00  | 9.00   | 11.00  | 14.00  | 17.00  | 2.888 | 12.535  | 4.367   | 8.00  | 9.00   | 12.00  | 15.00  | 18.00   |
| 0.05       | 2.693 | 0.1815312 | 0.0092496 | 0.70 | 1.00 | 7.172   | 1.837   | 5.00  | 6.00   | 7.00   | 8.00   | 10.00  | 2.888 | 7.532   | 1.900   | 5.00  | 6.00   | 7.00   | 9.00   | 10.00   |
| 0.05       | 2.693 | 0.1815312 | 0.0092496 | 0.60 | 1.00 | 5.138   | 1.063   | 4.00  | 4.00   | 5.00   | 6.00   | 7.00   | 2.888 | 5.357   | 1.107   | 4.00  | 5.00   | 5.00   | 6.00   | 7.00    |
| 0.05       | 2.693 | 0.1815312 | 0.0092496 | 0.50 | 1.00 | 4.001   | 0.703   | 3.00  | 4.00   | 4.00   | 4.00   | 5.00   | 2.888 | 4.171   | 0.712   | 3.00  | 4.00   | 4.00   | 5.00   | 5.00    |
| 0.05       | 2.693 | 0.1815312 | 0.0092496 | 1.00 | 1.10 | 303.874 | 281.476 | 48.00 | 101.00 | 218.00 | 418.00 | 681.00 | 2.888 | 409.900 | 399.677 | 63.00 | 132.00 | 289.00 | 552.25 | 917.00  |
| 0.10       | 2.990 | 0.2591099 | 0.0188559 | 1.00 | 1.00 | 370.596 | 361.021 | 48.00 | 115.00 | 262.00 | 510.25 | 838.00 | 3.164 | 500.156 | 491.339 | 61.00 | 150.00 | 348.00 | 686.00 | 1147.00 |
| 0.10       | 2.990 | 0.2591099 | 0.0188559 | 1.10 | 1.00 | 35.696  | 26.596  | 11.00 | 17.00  | 28.00  | 46.00  | 71.00  | 3.164 | 40.091  | 30.350  | 12.00 | 19.00  | 31.00  | 52.00  | 80.00   |
| 0.10       | 2.990 | 0.2591099 | 0.0188559 | 1.20 | 1.00 | 11.957  | 5.950   | 6.00  | 8.00   | 11.00  | 15.00  | 20.00  | 3.164 | 12.540  | 6.174   | 6.00  | 8.00   | 11.00  | 16.00  | 21.00   |
| 0.10       | 2.990 | 0.2591099 | 0.0188559 | 1.30 | 1.00 | 7.051   | 2.654   | 4.00  | 5.00   | 7.00   | 8.00   | 11.00  | 3.164 | 7.421   | 2.824   | 4.00  | 5.00   | 7.00   | 9.00   | 11.00   |
| 0.10       | 2.990 | 0.2591099 | 0.0188559 | 1.40 | 1.00 | 5.118   | 1.628   | 3.00  | 4.00   | 5.00   | 6.00   | 7.00   | 3.164 | 5.299   | 1.675   | 3.00  | 4.00   | 5.00   | 6.00   | 7.00    |
| 0.10       | 2.990 | 0.2591099 | 0.0188559 | 0.90 | 1.00 | 34.862  | 25.078  | 12.00 | 17.00  | 28.00  | 45.00  | 68.00  | 3.164 | 38.453  | 27.988  | 13.00 | 19.00  | 31.00  | 50.00  | 75.00   |
| 0.10       | 2.990 | 0.2591099 | 0.0188559 | 0.80 | 1.00 | 10.609  | 4.643   | 6.00  | 7.00   | 10.00  | 13.00  | 17.00  | 3.164 | 11.164  | 4.856   | 6.00  | 8.00   | 10.00  | 13.00  | 17.00   |
| 0.10       | 2.990 | 0.2591099 | 0.0188559 | 0.70 | 1.00 | 6.018   | 1.851   | 4.00  | 5.00   | 6.00   | 7.00   | 8.00   | 3.164 | 6.280   | 1.923   | 4.00  | 5.00   | 6.00   | 7.00   | 9.00    |
| 0.10       | 2.990 | 0.2591099 | 0.0188559 | 0.60 | 1.00 | 4.211   | 1.035   | 3.00  | 3.00   | 4.00   | 5.00   | 6.00   | 3.164 | 4.360   | 1.073   | 3.00  | 4.00   | 4.00   | 5.00   | 6.00    |
| 0.10       | 2.990 | 0.2591099 | 0.0188559 | 0.50 | 1.00 | 3.252   | 0.658   | 3.00  | 3.00   | 3.00   | 4.00   | 4.00   | 3.164 | 3.379   | 0.666   | 3.00  | 3.00   | 3.00   | 4.00   | 4.00    |
| 0.15       | 3.108 | 0.3218169 | 0.0287890 | 1.00 | 1.00 | 370.684 | 364.987 | 45.00 | 113.00 | 256.00 | 512.00 | 852.00 | 3.276 | 499.238 | 497.396 | 58.00 | 151.00 | 339.50 | 685.00 | 1141.00 |
| 0.15       | 3.108 | 0.3218169 | 0.0287890 | 1.10 | 1.00 | 39.968  | 33.213  | 10.00 | 16.00  | 30.00  | 53.00  | 83.10  | 3.276 | 45.043  | 38.371  | 11.00 | 18.00  | 34.00  | 60.00  | 95.00   |
| 0.15       | 3.108 | 0.3218169 | 0.0287890 | 1.20 | 1.00 | 11.809  | 6.951   | 5.00  | 7.00   | 10.00  | 15.00  | 21.00  | 3.276 | 12.528  | 7.356   | 5.00  | 7.00   | 11.00  | 16.00  | 22.00   |
| 0.15       | 3.108 | 0.3218169 | 0.0287890 | 1.30 | 1.00 | 6.635   | 2.944   | 4.00  | 5.00   | 6.00   | 8.00   | 10.00  | 3.276 | 6.825   | 3.010   | 4.00  | 5.00   | 6.00   | 8.00   | 11.00   |
| 0.15       | 3.108 | 0.3218169 | 0.0287890 | 1.40 | 1.00 | 4.623   | 1.671   | 3.00  | 3.00   | 4.00   | 5.00   | 7.00   | 3.276 | 4.825   | 1.753   | 3.00  | 4.00   | 5.00   | 6.00   | 7.00    |
| 0.15       | 3.108 | 0.3218169 | 0.0287890 | 0.90 | 1.00 | 40.848  | 33.581  | 11.00 | 17.00  | 31.00  | 54.00  | 84.00  | 3.276 | 46.845  | 38.272  | 12.00 | 20.00  | 35.00  | 62.00  | 97.00   |
| 0.15       | 3.108 | 0.3218169 | 0.0287890 | 0.80 | 1.00 | 10.434  | 5.283   | 5.00  | 7.00   | 9.00   | 13.00  | 17.00  | 3.276 | 11.083  | 5.875   | 5.00  | 7.00   | 10.00  | 14.00  | 19.00   |
| 0.15       | 3.108 | 0.3218169 | 0.0287890 | 0.70 | 1.00 | 5.508   | 1.968   | 3.00  | 4.00   | 5.00   | 7.00   | 8.00   | 3.276 | 5.764   | 2.046   | 4.00  | 4.00   | 5.00   | 7.00   | 8.00    |
| 0.15       | 3.108 | 0.3218169 | 0.0287890 | 0.60 | 1.00 | 3.770   | 1.033   | 3.00  | 3.00   | 4.00   | 4.00   | 5.00   | 3.276 | 3.914   | 1.075   | 3.00  | 3.00   | 4.00   | 4.00   | 5.00    |
| 0.15       | 3.108 | 0.3218169 | 0.0287890 | 0.50 | 1.00 | 2.872   | 0.687   | 2.00  | 2.00   | 3.00   | 3.00   | 4.00   | 3.276 | 2.970   | 0.693   | 2.00  | 3.00   | 3.00   | 3.00   | 4.00    |
| Case 3     |       |           |           |      |      |         |         |       |        |        |        |        |       |         |         |       |        |        |        |         |
| $\phi=80$  |       |           |           |      |      |         |         |       |        |        |        |        |       |         |         |       |        |        |        |         |
| 0.05       | 2.707 | 0.1806445 | 0.0092291 | 1.00 | 1.00 | 370.278 | 351.550 | 53.00 | 117.00 | 257.00 | 512.00 | 834.00 | 2.887 | 500.015 | 480.233 | 66.00 | 154.00 | 350.00 | 690.00 | 1114.10 |
| 0.05       | 2.707 | 0.1806445 | 0.0092291 | 1.10 | 1.00 | 53.098  | 36.921  | 18.00 | 27.00  | 43.00  | 69.00  | 103.00 | 2.887 | 58.162  | 41.626  | 19.00 | 29.00  | 47.00  | 75.00  | 111.00  |
| 0.05       | 2.707 | 0.1806445 | 0.0092291 | 1.20 | 1.00 | 19.426  | 9.208   | 10.00 | 13.00  | 18.00  | 24.00  | 32.00  | 2.887 | 20.724  | 9.816   | 10.00 | 14.00  | 19.00  | 26.00  | 34.00   |
| 0.05       | 2.707 | 0.1806445 | 0.0092291 | 1.30 | 1.00 | 11.874  | 4.527   | 7.00  | 9.00   | 11.00  | 14.00  | 18.00  | 2.887 | 12.480  | 4.673   | 7.00  | 9.00   | 12.00  | 15.00  | 19.00   |
| 0.05       | 2.707 | 0.1806445 | 0.0092291 | 1.40 | 1.00 | 8.630   | 2.758   | 5.00  | 7.00   | 8.00   | 10.00  | 12.00  | 2.887 | 9.002   | 2.866   | 6.00  | 7.00   | 9.00   | 11.00  | 13.00   |
| 0.05       | 2.707 | 0.1806445 | 0.0092291 | 0.90 | 1.00 | 50.626  | 34.050  | 18.00 | 27.00  | 41.00  | 65.00  | 94.00  | 2.887 | 55.354  | 37.533  | 20.00 | 29.00  | 45.00  | 71.00  | 103.10  |
| 0.05       | 2.707 | 0.1806445 | 0.0092291 | 0.80 | 1.00 | 17.552  | 7.415   | 10.00 | 12.00  | 16.00  | 21.00  | 27.00  | 2.887 | 18.547  | 7.822   | 10.00 | 13.00  | 17.00  | 22.00  | 29.00   |
| 0.05       | 2.707 | 0.1806445 | 0.0092291 | 0.70 | 1.00 | 10.121  | 3.113   | 7.00  | 8.00   | 10.00  | 12.00  | 14.00  | 2.887 | 10.734  | 3.355   | 7.00  | 8.00   | 10.00  | 13.00  | 15.00   |
| 0.05       | 2.707 | 0.1806445 | 0.0092291 | 0.60 | 1.00 | 7.107   | 1.752   | 5.00  | 6.00   | 7.00   | 8.00   | 9.00   | 2.887 | 7.435   | 1.813   | 5.00  | 6.00   | 7.00   | 8.00   | 10.00   |
| 0.05       | 2.707 | 0.1806445 | 0.0092291 | 0.50 | 1.00 | 5.436   | 1.099   | 4.00  | 5.00   | 5.00   | 6.00   | 7.00   | 2.887 | 5.676   | 1.133   | 4.00  | 5.00   | 6.00   | 6.00   | 7.00    |
| 0.10       | 2.989 | 0.2591572 | 0.0188247 | 1.00 | 1.00 | 369.285 | 363.063 | 47.00 | 111.00 | 257.00 | 509.00 | 827.00 | 3.165 | 500.538 | 486.596 | 61.00 | 147.00 | 346.00 | 702.00 | 1148.00 |
| 0.10       | 2.989 | 0.2591572 | 0.0188247 | 1.10 | 1.00 | 59.103  | 48.905  | 15.00 | 25.00  | 44.00  | 78.00  | 124.00 | 3.165 | 69.053  | 58.262  | 16.00 | 28.00  | 52.00  | 92.00  | 144.00  |
| 0.10       | 2.989 | 0.2591572 | 0.0188247 | 1.20 | 1.00 | 18.983  | 11.596  | 8.00  | 11.00  | 16.00  | 24.00  | 34.00  | 3.165 | 20.447  | 12.346  | 8.00  | 12.00  | 17.00  | 26.00  | 36.10   |
| 0.10       | 2.989 | 0.2591572 | 0.0188247 | 1.30 | 1.00 | 10.700  | 5.103   | 5.00  | 7.00   | 10.00  | 13.00  | 17.00  | 3.165 | 11.300  | 5.402   | 6.00  | 7.00   | 10.00  | 14.00  | 18.00   |
| 0.10       | 2.989 | 0.2591572 | 0.0188247 | 1.40 | 1.00 | 7.409   | 2.922   | 4.00  | 5.00   | 7.00   | 9.00   | 11.00  | 3.165 | 7.793   | 3.040   | 4.00  | 6.00   | 7.00   | 9.00   | 12.00   |
| 0.10       | 2.989 | 0.2591572 | 0.0188247 | 0.90 | 1.00 | 63.702  | 51.384  | 16.00 | 27.00  | 49.00  | 84.00  | 131.00 | 3.165 | 74.447  | 61.985  | 18.00 | 31.00  | 56.00  | 99.00  | 154.00  |
| 0.10       | 2.989 | 0.2591572 | 0.0188247 | 0.80 | 1.00 | 17.017  | 9.293   | 8.00  | 10.00  | 15.00  | 21.00  | 29.00  | 3.165 | 18.170  | 9.969   | 8.00  | 11.00  | 16.00  | 23.00  | 31.00   |
| 0.10       | 2.989 | 0.2591572 | 0.0188247 | 0.70 | 1.00 | 8.888   | 3.392   | 5.00  | 6.00   | 8.00   | 11.00  | 13.00  | 3.165 | 9.372   | 3.618   | 6.00  | 7.00   | 9.00   | 11.00  | 14.00   |
| 0.10       | 2.989 | 0.2591572 | 0.0188247 | 0.60 | 1.00 | 5.960   | 1.779   | 4.00  | 5.00   | 6.00   | 7.00   | 8.00   | 3.165 | 6.198   | 1.821   | 4.00  | 5.00   | 6.00   | 7.00   | 9.00    |
| 0.10       | 2.989 | 0.2591572 | 0.0188247 | 0.50 | 1.00 | 4.468   | 1.101   | 3.00  | 4.00   | 4.00   | 5.00   | 6.00   | 3.165 | 4.665   | 1.123   | 3.00  | 4.00   | 4.00   | 5.00   | 6.00    |
| 0.15       | 3.117 | 0.3219652 | 0.0288123 | 1.00 | 1.00 | 371.785 | 363.854 | 44.00 | 112.00 | 262.50 | 511.00 | 842.10 | 3.290 | 500.964 | 488.821 | 57.00 | 150.00 | 353.00 | 703.00 | 1142.00 |
| 0.15       | 3.117 | 0.3219652 | 0.0288123 | 1.10 | 1.00 | 67.264  | 59.879  | 13.00 | 24.00  | 49.00  | 92.00  | 146.00 | 3.290 | 79.780  | 73.469  | 15.00 | 28.75  | 58.00  | 106.00 | 174.00  |
| 0.15       | 3.117 | 0.3219652 | 0.0288123 | 1.20 | 1.00 | 20.200  | 14.459  | 7.00  | 10.00  | 16.00  | 26.00  | 39.00  | 3.290 | 21.944  | 15.673  | 7.00  | 11.00  | 17.00  | 28.00  | 43.00   |
| 0.15       | 3.117 | 0.3219652 | 0.0288123 | 1.30 | 1.00 | 10.378  | 5.648   | 5.00  | 6.00   | 9.00   | 13.00  | 18.00  | 3.290 | 11.151  | 6.225   | 5.00  | 7.00   | 10.00  | 14.00  | 19.00   |
| 0.15       | 3.117 | 0.3219652 | 0.0288123 | 1.40 | 1.00 | 6.930   | 3.102   | 4.00  | 5.00   |        |        |        |       |         |         |       |        |        |        |         |

|                             |       |           |           |      |      |         |         |       |        |        |        |        |       |         |         |       |        |        |        |         |
|-----------------------------|-------|-----------|-----------|------|------|---------|---------|-------|--------|--------|--------|--------|-------|---------|---------|-------|--------|--------|--------|---------|
| 0.15                        | 3.117 | 0.3219652 | 0.0288123 | 0.80 | 1.00 | 18.015  | 11.504  | 7.00  | 10.00  | 15.00  | 23.00  | 33.00  | 3.290 | 20.008  | 13.065  | 8.00  | 11.00  | 17.00  | 25.00  | 37.00   |
| 0.15                        | 3.117 | 0.3219652 | 0.0288123 | 0.70 | 1.00 | 8.617   | 3.889   | 5.00  | 6.00   | 8.00   | 10.00  | 14.00  | 3.290 | 9.100   | 4.096   | 5.00  | 6.00   | 8.00   | 11.00  | 14.00   |
| 0.15                        | 3.117 | 0.3219652 | 0.0288123 | 0.60 | 1.00 | 5.486   | 1.882   | 3.00  | 4.00   | 5.00   | 6.00   | 8.00   | 3.290 | 5.776   | 1.981   | 4.00  | 4.00   | 5.00   | 7.00   | 8.00    |
| 0.15                        | 3.117 | 0.3219652 | 0.0288123 | 0.50 | 1.00 | 4.036   | 1.089   | 3.00  | 3.00   | 4.00   | 5.00   | 5.00   | 3.290 | 4.202   | 1.137   | 3.00  | 3.00   | 4.00   | 5.00   | 6.00    |
| <b>Case 4</b>               |       |           |           |      |      |         |         |       |        |        |        |        |       |         |         |       |        |        |        |         |
| <b><math>\phi=31</math></b> |       |           |           |      |      |         |         |       |        |        |        |        |       |         |         |       |        |        |        |         |
| 0.05                        | 2.704 | 0.1807397 | 0.0092360 | 1.00 | 1.00 | 370.431 | 354.684 | 54.00 | 118.00 | 261.00 | 511.00 | 821.10 | 2.898 | 500.250 | 473.620 | 68.00 | 158.00 | 352.00 | 690.00 | 1129.10 |
| 0.05                        | 2.704 | 0.1807397 | 0.0092360 | 1.10 | 1.00 | 100.546 | 83.409  | 24.00 | 42.00  | 76.00  | 133.00 | 208.00 | 2.898 | 118.349 | 100.357 | 28.00 | 48.00  | 88.50  | 157.00 | 250.10  |
| 0.05                        | 2.704 | 0.1807397 | 0.0092360 | 1.20 | 1.00 | 38.008  | 24.350  | 14.00 | 21.00  | 32.00  | 48.00  | 70.00  | 2.898 | 41.652  | 26.874  | 15.00 | 23.00  | 35.00  | 53.00  | 76.00   |
| 0.05                        | 2.704 | 0.1807397 | 0.0092360 | 1.30 | 1.00 | 21.785  | 11.136  | 10.00 | 14.00  | 19.00  | 27.00  | 37.00  | 2.898 | 23.379  | 12.003  | 11.00 | 15.00  | 21.00  | 29.00  | 39.00   |
| 0.05                        | 2.704 | 0.1807397 | 0.0092360 | 1.40 | 1.00 | 15.230  | 6.577   | 8.00  | 11.00  | 14.00  | 19.00  | 24.00  | 2.898 | 16.130  | 7.104   | 9.00  | 11.00  | 15.00  | 20.00  | 25.00   |
| 0.05                        | 2.704 | 0.1807397 | 0.0092360 | 0.90 | 1.00 | 108.327 | 90.110  | 28.00 | 45.00  | 81.00  | 142.00 | 224.00 | 2.898 | 129.345 | 107.570 | 33.00 | 53.00  | 97.00  | 173.00 | 272.00  |
| 0.05                        | 2.704 | 0.1807397 | 0.0092360 | 0.80 | 1.00 | 33.999  | 19.267  | 15.00 | 20.00  | 29.00  | 43.00  | 59.00  | 2.898 | 37.639  | 21.833  | 17.00 | 22.00  | 32.00  | 47.00  | 66.00   |
| 0.05                        | 2.704 | 0.1807397 | 0.0092360 | 0.70 | 1.00 | 18.402  | 7.690   | 10.00 | 13.00  | 17.00  | 22.00  | 28.00  | 2.898 | 19.528  | 8.189   | 11.00 | 14.00  | 18.00  | 23.00  | 30.00   |
| 0.05                        | 2.704 | 0.1807397 | 0.0092360 | 0.60 | 1.00 | 12.249  | 4.013   | 8.00  | 9.00   | 11.50  | 14.00  | 18.00  | 2.898 | 12.768  | 4.096   | 8.00  | 10.00  | 12.00  | 15.00  | 18.00   |
| 0.05                        | 2.704 | 0.1807397 | 0.0092360 | 0.50 | 1.00 | 9.094   | 2.408   | 6.00  | 7.00   | 9.00   | 10.00  | 12.00  | 2.898 | 9.525   | 2.493   | 7.00  | 8.00   | 9.00   | 11.00  | 13.00   |
| 0.10                        | 2.992 | 0.2594297 | 0.0188990 | 1.00 | 1.00 | 370.488 | 362.731 | 45.00 | 111.75 | 259.00 | 513.00 | 849.00 | 3.165 | 500.660 | 496.742 | 62.00 | 151.00 | 350.00 | 680.25 | 1146.10 |
| 0.10                        | 2.992 | 0.2594297 | 0.0188990 | 1.10 | 1.00 | 112.876 | 101.901 | 20.00 | 40.00  | 82.00  | 154.00 | 246.00 | 3.165 | 138.097 | 129.040 | 23.00 | 47.00  | 99.00  | 188.00 | 301.00  |
| 0.10                        | 2.992 | 0.2594297 | 0.0188990 | 1.20 | 1.00 | 40.774  | 31.588  | 12.00 | 18.00  | 32.00  | 53.00  | 83.00  | 3.165 | 46.338  | 36.648  | 13.00 | 21.00  | 36.00  | 61.00  | 94.00   |
| 0.10                        | 2.992 | 0.2594297 | 0.0188990 | 1.30 | 1.00 | 21.870  | 14.318  | 8.00  | 12.00  | 18.00  | 28.00  | 40.00  | 3.165 | 23.463  | 15.312  | 9.00  | 13.00  | 19.00  | 30.00  | 43.00   |
| 0.10                        | 2.992 | 0.2594297 | 0.0188990 | 1.40 | 1.00 | 14.135  | 7.620   | 6.00  | 9.00   | 12.00  | 18.00  | 24.00  | 3.165 | 15.204  | 8.391   | 7.00  | 9.00   | 13.00  | 19.00  | 26.00   |
| 0.10                        | 2.992 | 0.2594297 | 0.0188990 | 0.90 | 1.00 | 159.405 | 145.433 | 28.00 | 56.00  | 116.00 | 217.00 | 347.10 | 3.165 | 202.965 | 189.170 | 33.00 | 67.00  | 145.00 | 275.00 | 451.00  |
| 0.10                        | 2.992 | 0.2594297 | 0.0188990 | 0.80 | 1.00 | 40.533  | 29.203  | 14.00 | 20.00  | 32.00  | 52.00  | 78.00  | 3.165 | 46.553  | 35.065  | 14.00 | 22.00  | 36.00  | 60.00  | 92.00   |
| 0.10                        | 2.992 | 0.2594297 | 0.0188990 | 0.70 | 1.00 | 18.140  | 9.774   | 9.00  | 11.00  | 16.00  | 22.00  | 31.00  | 3.165 | 19.511  | 10.842  | 9.00  | 12.00  | 17.00  | 24.00  | 34.00   |
| 0.10                        | 2.992 | 0.2594297 | 0.0188990 | 0.60 | 1.00 | 11.072  | 4.548   | 6.00  | 8.00   | 10.00  | 13.00  | 17.00  | 3.165 | 11.763  | 4.815   | 7.00  | 8.00   | 11.00  | 14.00  | 18.00   |
| 0.10                        | 2.992 | 0.2594297 | 0.0188990 | 0.50 | 1.00 | 7.882   | 2.554   | 5.00  | 6.00   | 7.00   | 9.00   | 11.00  | 3.165 | 8.284   | 2.681   | 5.00  | 6.00   | 8.00   | 10.00  | 12.00   |
| 0.15                        | 3.138 | 0.3220597 | 0.0288483 | 1.00 | 1.00 | 370.824 | 363.596 | 44.00 | 108.00 | 259.00 | 518.00 | 850.00 | 3.299 | 500.344 | 494.834 | 56.90 | 145.00 | 341.00 | 706.00 | 1147.00 |
| 0.15                        | 3.138 | 0.3220597 | 0.0288483 | 1.10 | 1.00 | 123.581 | 117.522 | 19.00 | 41.00  | 88.00  | 167.00 | 276.10 | 3.299 | 148.208 | 139.877 | 22.00 | 47.00  | 106.00 | 203.00 | 333.00  |
| 0.15                        | 3.138 | 0.3220597 | 0.0288483 | 1.20 | 1.00 | 46.086  | 39.288  | 11.00 | 18.00  | 35.00  | 61.00  | 97.00  | 3.299 | 52.803  | 45.939  | 12.00 | 21.00  | 39.00  | 70.00  | 113.00  |
| 0.15                        | 3.138 | 0.3220597 | 0.0288483 | 1.30 | 1.00 | 23.034  | 17.160  | 7.00  | 11.00  | 18.00  | 30.00  | 45.00  | 3.299 | 25.393  | 19.301  | 8.00  | 12.00  | 20.00  | 33.00  | 50.00   |
| 0.15                        | 3.138 | 0.3220597 | 0.0288483 | 1.40 | 1.00 | 14.374  | 9.130   | 6.00  | 8.00   | 12.00  | 18.00  | 26.00  | 3.299 | 15.523  | 9.936   | 6.00  | 9.00   | 13.00  | 20.00  | 28.00   |
| 0.15                        | 3.138 | 0.3220597 | 0.0288483 | 0.90 | 1.00 | 225.198 | 215.012 | 32.00 | 72.00  | 159.50 | 308.00 | 505.10 | 3.299 | 309.139 | 299.179 | 39.00 | 93.75  | 218.00 | 430.00 | 698.00  |
| 0.15                        | 3.138 | 0.3220597 | 0.0288483 | 0.80 | 1.00 | 53.838  | 45.852  | 13.00 | 22.00  | 40.00  | 72.00  | 112.00 | 3.299 | 62.829  | 53.581  | 14.00 | 25.00  | 47.00  | 83.00  | 134.00  |
| 0.15                        | 3.138 | 0.3220597 | 0.0288483 | 0.70 | 1.00 | 20.498  | 13.233  | 8.00  | 11.00  | 17.00  | 26.00  | 38.00  | 3.299 | 22.194  | 14.635  | 8.00  | 12.00  | 18.00  | 28.00  | 41.00   |
| 0.15                        | 3.138 | 0.3220597 | 0.0288483 | 0.60 | 1.00 | 11.151  | 5.482   | 6.00  | 7.00   | 10.00  | 13.00  | 18.00  | 3.299 | 11.897  | 5.776   | 6.00  | 8.00   | 11.00  | 15.00  | 20.00   |
| 0.15                        | 3.138 | 0.3220597 | 0.0288483 | 0.50 | 1.00 | 7.468   | 2.825   | 5.00  | 5.00   | 7.00   | 9.00   | 11.00  | 3.299 | 7.859   | 2.983   | 5.00  | 6.00   | 7.00   | 9.00   | 12.00   |

TABLE S.6. ARL Results of the Max-EWMA control chart when pure shift occurs in the rate parameter of UNH distribution ( $\Delta_\lambda \in (1.0, 1.1, 1.2, 1.3, 1.4, 0.9, 0.8, 0.7, 0.6, 0.5)$ ,  $\Delta_\gamma = 1.0$ ) when  $X \sim B(\gamma, \delta)$ ,  $T \sim UNH(\alpha, \lambda)$ ,  $\mu = 0.20$ ,  $\alpha_0 = 1.50$ ,  $\lambda_0 = 1.00$ ,  $ARL_0 \in (370, 500)$  and  $\theta_e \in (0.05, 0.10, 0.15)$

| $\theta_e$                   | $K$   | $EM$      | $VM$      | $\Delta_\gamma$ | $\Delta_\lambda$ | $ARL$   | $SDRL$  | $q10$ | $q25$  | $q50$  | $q75$  | $q90$  | $K$   | $ARL$   | $SDRL$        | $q10$ | $q25$  | $q50$  | $q75$  | $q90$   |
|------------------------------|-------|-----------|-----------|-----------------|------------------|---------|---------|-------|--------|--------|--------|--------|-------|---------|---------------|-------|--------|--------|--------|---------|
| <b>Case 1</b>                |       |           |           |                 |                  |         |         |       |        |        |        |        |       |         |               |       |        |        |        |         |
| <b><math>\phi=290</math></b> |       |           |           |                 |                  |         |         |       |        |        |        |        |       |         |               |       |        |        |        |         |
|                              |       |           |           |                 | $ARL_0 = 370$    |         |         |       |        |        |        |        |       |         | $ARL_0 = 500$ |       |        |        |        |         |
| 0.05                         | 2.687 | 0.1808245 | 0.0092612 | 1.00            | 1.00             | 370.125 | 351.717 | 53.00 | 117.00 | 263.00 | 512.25 | 821.00 | 2.887 | 500.934 | 478.084       | 67.00 | 160.00 | 356.00 | 695.00 | 1128.00 |
| 0.05                         | 2.687 | 0.1808245 | 0.0092612 | 1.00            | 1.10             | 294.943 | 275.383 | 48.00 | 98.00  | 212.00 | 402.00 | 655.10 | 2.887 | 406.950 | 387.459       | 61.00 | 133.00 | 287.00 | 555.00 | 923.10  |
| 0.05                         | 2.687 | 0.1808245 | 0.0092612 | 1.00            | 1.20             | 168.570 | 147.302 | 36.00 | 64.00  | 123.00 | 227.00 | 358.10 | 2.887 | 215.841 | 191.235       | 44.00 | 80.00  | 159.00 | 292.00 | 464.10  |
| 0.05                         | 2.687 | 0.1808245 | 0.0092612 | 1.00            | 1.30             | 101.895 | 80.189  | 29.00 | 45.00  | 78.00  | 134.00 | 208.00 | 2.887 | 120.936 | 96.465        | 32.00 | 53.00  | 92.00  | 158.00 | 250.10  |
| 0.05                         | 2.687 | 0.1808245 | 0.0092612 | 1.00            | 1.40             | 68.045  | 48.032  | 24.00 | 35.00  | 55.00  | 86.00  | 129.00 | 2.887 | 79.867  | 57.705        | 27.00 | 40.00  | 63.00  | 102.00 | 154.00  |
| 0.05                         | 2.687 | 0.1808245 | 0.0092612 | 1.00            | 0.90             | 196.312 | 178.978 | 35.00 | 69.00  | 142.00 | 266.00 | 424.00 | 2.887 | 247.312 | 229.273       | 41.00 | 85.00  | 177.00 | 338.00 | 546.00  |
| 0.05                         | 2.687 | 0.1808245 | 0.0092612 | 1.00            | 0.80             | 82.338  | 67.122  | 21.00 | 35.00  | 62.00  | 109.00 | 171.00 | 2.887 | 98.027  | 81.735        | 24.00 | 41.00  | 75.00  | 129.25 | 202.10  |
| 0.05                         | 2.687 | 0.1808245 | 0.0092612 | 1.00            | 0.70             | 42.356  | 29.669  | 15.00 | 22.00  | 34.00  | 54.00  | 80.00  | 2.887 | 47.343  | 33.509        | 16.00 | 24.00  | 38.00  | 61.00  | 91.00   |
| 0.05                         | 2.687 | 0.1808245 | 0.0092612 | 1.00            | 0.60             | 25.197  | 14.982  | 11.00 | 15.00  | 21.00  | 32.00  | 45.00  | 2.887 | 27.133  | 16.063        | 11.00 | 16.00  | 23.00  | 34.00  | 48.00   |
| 0.05                         | 2.687 | 0.1808245 | 0.0092612 | 1.00            | 0.50             | 16.688  | 8.497   | 8.00  | 11.00  | 15.00  | 21.00  | 28.00  | 2.887 | 17.649  | 8.883         | 9.00  | 11.00  | 16.00  | 22.00  | 29.00   |
| 0.10                         | 2.988 | 0.2588680 | 0.0188363 | 1.00            | 1.00             | 370.022 | 359.925 | 45.00 | 111.00 | 256.50 | 507.00 | 845.00 | 3.162 | 501.845 | 494.182       | 65.00 | 154.00 | 350.00 | 700.00 | 1126.00 |

|                              |       |           |           |      |      |         |         |       |        |        |        |        |       |         |         |       |        |        |        |         |  |
|------------------------------|-------|-----------|-----------|------|------|---------|---------|-------|--------|--------|--------|--------|-------|---------|---------|-------|--------|--------|--------|---------|--|
| 0.10                         | 2.988 | 0.2588680 | 0.0188363 | 1.00 | 1.10 | 374.510 | 363.947 | 48.00 | 119.00 | 266.00 | 513.00 | 851.00 | 3.162 | 526.757 | 517.628 | 65.00 | 159.00 | 368.00 | 724.00 | 1209.10 |  |
| 0.10                         | 2.988 | 0.2588680 | 0.0188363 | 1.00 | 1.20 | 269.127 | 260.030 | 39.00 | 87.00  | 189.00 | 365.00 | 605.10 | 3.162 | 371.321 | 359.274 | 52.00 | 116.00 | 262.00 | 514.25 | 834.00  |  |
| 0.10                         | 2.988 | 0.2588680 | 0.0188363 | 1.00 | 1.30 | 173.792 | 158.114 | 31.00 | 59.00  | 125.00 | 238.00 | 376.10 | 3.162 | 228.755 | 213.410 | 38.90 | 77.00  | 163.00 | 309.00 | 502.10  |  |
| 0.10                         | 2.988 | 0.2588680 | 0.0188363 | 1.00 | 1.40 | 111.925 | 96.556  | 24.00 | 43.00  | 84.00  | 149.00 | 237.00 | 3.162 | 145.887 | 130.009 | 28.00 | 52.00  | 107.00 | 196.25 | 318.00  |  |
| 0.10                         | 2.988 | 0.2588680 | 0.0188363 | 1.00 | 0.90 | 203.425 | 192.312 | 30.00 | 66.00  | 144.00 | 280.00 | 457.00 | 3.162 | 259.390 | 245.912 | 36.00 | 81.00  | 186.00 | 357.00 | 581.00  |  |
| 0.10                         | 2.988 | 0.2588680 | 0.0188363 | 1.00 | 0.80 | 90.199  | 80.745  | 18.00 | 33.00  | 66.00  | 121.00 | 193.00 | 3.162 | 109.170 | 101.345 | 20.00 | 38.00  | 78.00  | 147.00 | 238.10  |  |
| 0.10                         | 2.988 | 0.2588680 | 0.0188363 | 1.00 | 0.70 | 43.822  | 35.625  | 12.00 | 19.00  | 33.00  | 57.00  | 90.00  | 3.162 | 49.423  | 40.097  | 13.00 | 21.00  | 37.00  | 65.00  | 104.00  |  |
| 0.10                         | 2.988 | 0.2588680 | 0.0188363 | 1.00 | 0.60 | 24.508  | 17.197  | 8.00  | 12.00  | 20.00  | 32.00  | 47.00  | 3.162 | 26.404  | 18.461  | 9.00  | 13.00  | 21.00  | 34.00  | 51.00   |  |
| 0.10                         | 2.988 | 0.2588680 | 0.0188363 | 1.00 | 0.50 | 15.243  | 9.270   | 6.00  | 9.00   | 13.00  | 19.00  | 27.00  | 3.162 | 16.274  | 9.817   | 7.00  | 9.00   | 14.00  | 21.00  | 29.00   |  |
| 0.15                         | 3.105 | 0.3220389 | 0.0289256 | 1.00 | 1.00 | 370.360 | 360.606 | 44.00 | 110.00 | 260.00 | 512.00 | 851.00 | 3.267 | 500.683 | 496.854 | 56.00 | 149.00 | 351.00 | 691.00 | 1143.00 |  |
| 0.15                         | 3.105 | 0.3220389 | 0.0289256 | 1.00 | 1.10 | 430.106 | 414.059 | 52.00 | 132.00 | 301.00 | 598.00 | 981.00 | 3.267 | 613.382 | 608.870 | 72.00 | 185.00 | 423.00 | 839.25 | 1390.10 |  |
| 0.15                         | 3.105 | 0.3220389 | 0.0289256 | 1.00 | 1.20 | 377.350 | 373.597 | 48.00 | 114.00 | 261.00 | 519.00 | 854.00 | 3.267 | 534.285 | 528.118 | 62.00 | 158.00 | 376.00 | 739.00 | 1220.10 |  |
| 0.15                         | 3.105 | 0.3220389 | 0.0289256 | 1.00 | 1.30 | 278.518 | 269.726 | 38.00 | 87.00  | 195.00 | 383.00 | 624.00 | 3.267 | 389.204 | 387.257 | 50.00 | 118.00 | 269.00 | 530.00 | 886.00  |  |
| 0.15                         | 3.105 | 0.3220389 | 0.0289256 | 1.00 | 1.40 | 194.508 | 186.441 | 30.00 | 63.00  | 136.00 | 265.00 | 431.00 | 3.267 | 270.591 | 253.414 | 39.00 | 87.00  | 194.00 | 375.00 | 612.00  |  |
| 0.15                         | 3.105 | 0.3220389 | 0.0289256 | 1.00 | 0.90 | 210.726 | 202.355 | 29.00 | 67.00  | 150.00 | 289.00 | 476.00 | 3.267 | 270.241 | 262.665 | 34.00 | 83.00  | 189.00 | 373.00 | 612.00  |  |
| 0.15                         | 3.105 | 0.3220389 | 0.0289256 | 1.00 | 0.80 | 97.757  | 90.230  | 16.00 | 33.00  | 69.00  | 133.00 | 215.00 | 3.267 | 118.530 | 111.156 | 19.00 | 40.00  | 85.00  | 160.00 | 262.00  |  |
| 0.15                         | 3.105 | 0.3220389 | 0.0289256 | 1.00 | 0.70 | 46.094  | 39.425  | 11.00 | 18.00  | 34.00  | 61.25  | 98.00  | 3.267 | 53.029  | 45.263  | 11.00 | 20.00  | 39.00  | 73.00  | 113.00  |  |
| 0.15                         | 3.105 | 0.3220389 | 0.0289256 | 1.00 | 0.60 | 24.791  | 19.333  | 7.00  | 11.00  | 19.00  | 32.00  | 50.00  | 3.267 | 27.591  | 21.669  | 8.00  | 12.00  | 21.00  | 36.00  | 56.00   |  |
| 0.15                         | 3.105 | 0.3220389 | 0.0289256 | 1.00 | 0.50 | 15.027  | 10.268  | 5.00  | 8.00   | 12.00  | 19.00  | 28.00  | 3.267 | 16.110  | 11.012  | 6.00  | 8.00   | 13.00  | 21.00  | 31.00   |  |
| <b>Case 2</b>                |       |           |           |      |      |         |         |       |        |        |        |        |       |         |         |       |        |        |        |         |  |
| <b><math>\phi=148</math></b> |       |           |           |      |      |         |         |       |        |        |        |        |       |         |         |       |        |        |        |         |  |
| 0.05                         | 2.693 | 0.1815312 | 0.0092496 | 1.00 | 1.00 | 371.630 | 356.051 | 53.00 | 119.00 | 262.00 | 511.00 | 851.00 | 2.888 | 500.861 | 488.895 | 67.00 | 161.00 | 354.50 | 683.00 | 1124.00 |  |
| 0.05                         | 2.693 | 0.1815312 | 0.0092496 | 1.00 | 1.10 | 303.874 | 281.476 | 48.00 | 101.00 | 218.00 | 418.00 | 681.00 | 2.888 | 409.900 | 399.677 | 63.00 | 132.00 | 289.00 | 552.25 | 917.00  |  |
| 0.05                         | 2.693 | 0.1815312 | 0.0092496 | 1.00 | 1.20 | 170.846 | 153.220 | 36.00 | 64.00  | 125.00 | 228.00 | 365.00 | 2.888 | 216.777 | 192.915 | 43.00 | 80.00  | 158.00 | 291.25 | 471.00  |  |
| 0.05                         | 2.693 | 0.1815312 | 0.0092496 | 1.00 | 1.30 | 103.183 | 81.461  | 29.00 | 45.00  | 79.00  | 135.00 | 209.00 | 2.888 | 123.267 | 99.342  | 33.00 | 53.00  | 94.50  | 162.00 | 253.00  |  |
| 0.05                         | 2.693 | 0.1815312 | 0.0092496 | 1.00 | 1.40 | 68.715  | 47.744  | 24.00 | 35.00  | 56.00  | 88.00  | 130.00 | 2.888 | 79.156  | 56.510  | 27.00 | 40.00  | 63.00  | 101.00 | 152.00  |  |
| 0.05                         | 2.693 | 0.1815312 | 0.0092496 | 1.00 | 0.90 | 197.937 | 181.975 | 35.00 | 69.00  | 143.00 | 267.00 | 430.10 | 2.888 | 243.103 | 224.773 | 43.00 | 84.00  | 175.00 | 326.00 | 537.00  |  |
| 0.05                         | 2.693 | 0.1815312 | 0.0092496 | 1.00 | 0.80 | 83.549  | 68.474  | 21.00 | 35.00  | 63.00  | 110.00 | 173.00 | 2.888 | 97.781  | 80.804  | 25.00 | 42.00  | 74.00  | 127.00 | 203.00  |  |
| 0.05                         | 2.693 | 0.1815312 | 0.0092496 | 1.00 | 0.70 | 42.527  | 29.782  | 15.00 | 22.00  | 34.00  | 55.00  | 80.00  | 2.888 | 46.960  | 32.861  | 16.00 | 24.00  | 38.00  | 60.00  | 90.00   |  |
| 0.05                         | 2.693 | 0.1815312 | 0.0092496 | 1.00 | 0.60 | 25.171  | 14.719  | 11.00 | 15.00  | 22.00  | 32.00  | 44.00  | 2.888 | 27.078  | 15.556  | 11.00 | 16.00  | 23.00  | 34.00  | 48.00   |  |
| 0.05                         | 2.693 | 0.1815312 | 0.0092496 | 1.00 | 0.50 | 16.764  | 8.503   | 8.00  | 11.00  | 15.00  | 21.00  | 28.00  | 2.888 | 17.928  | 9.035   | 9.00  | 12.00  | 16.00  | 22.00  | 29.00   |  |
| 0.10                         | 2.990 | 0.2591099 | 0.0188559 | 1.00 | 1.00 | 370.596 | 361.021 | 48.00 | 115.00 | 262.00 | 510.25 | 838.00 | 3.164 | 500.156 | 491.339 | 61.00 | 150.00 | 348.00 | 686.00 | 1147.00 |  |
| 0.10                         | 2.990 | 0.2591099 | 0.0188559 | 1.00 | 1.10 | 384.682 | 370.358 | 49.00 | 117.00 | 273.00 | 537.00 | 861.00 | 3.164 | 528.167 | 522.843 | 70.90 | 164.00 | 372.00 | 711.00 | 1207.10 |  |
| 0.10                         | 2.990 | 0.2591099 | 0.0188559 | 1.00 | 1.20 | 264.132 | 251.979 | 39.00 | 85.00  | 190.00 | 359.00 | 588.00 | 3.164 | 367.726 | 351.873 | 51.00 | 117.00 | 262.00 | 503.00 | 826.00  |  |
| 0.10                         | 2.990 | 0.2591099 | 0.0188559 | 1.00 | 1.30 | 172.290 | 156.847 | 31.00 | 61.00  | 125.00 | 233.00 | 378.00 | 3.164 | 231.418 | 215.889 | 37.00 | 76.00  | 167.00 | 318.00 | 507.10  |  |
| 0.10                         | 2.990 | 0.2591099 | 0.0188559 | 1.00 | 1.40 | 114.412 | 101.518 | 25.00 | 44.00  | 83.00  | 152.00 | 244.00 | 3.164 | 144.128 | 130.460 | 28.00 | 52.00  | 105.00 | 192.00 | 312.00  |  |
| 0.10                         | 2.990 | 0.2591099 | 0.0188559 | 1.00 | 0.90 | 203.035 | 192.076 | 30.00 | 67.00  | 144.00 | 278.00 | 456.10 | 3.164 | 260.807 | 254.876 | 35.00 | 80.00  | 183.00 | 361.00 | 592.00  |  |
| 0.10                         | 2.990 | 0.2591099 | 0.0188559 | 1.00 | 0.80 | 91.975  | 81.483  | 18.00 | 33.00  | 67.00  | 125.00 | 200.00 | 3.164 | 109.460 | 99.400  | 20.00 | 40.00  | 79.00  | 147.00 | 236.00  |  |
| 0.10                         | 2.990 | 0.2591099 | 0.0188559 | 1.00 | 0.70 | 43.654  | 35.388  | 11.00 | 19.00  | 33.00  | 58.00  | 90.00  | 3.164 | 49.293  | 40.194  | 13.00 | 21.00  | 37.00  | 65.00  | 100.00  |  |
| 0.10                         | 2.990 | 0.2591099 | 0.0188559 | 1.00 | 0.60 | 24.650  | 17.336  | 8.00  | 12.00  | 20.00  | 32.00  | 48.00  | 3.164 | 26.816  | 19.106  | 9.00  | 13.00  | 21.50  | 34.00  | 52.00   |  |
| 0.10                         | 2.990 | 0.2591099 | 0.0188559 | 1.00 | 0.50 | 15.116  | 9.239   | 6.00  | 9.00   | 13.00  | 19.00  | 27.00  | 3.164 | 16.248  | 9.695   | 7.00  | 9.00   | 14.00  | 21.00  | 29.00   |  |
| 0.15                         | 3.108 | 0.3218169 | 0.0287890 | 1.00 | 1.00 | 370.684 | 364.987 | 45.00 | 113.00 | 256.00 | 512.00 | 852.00 | 3.276 | 499.238 | 497.396 | 58.00 | 151.00 | 339.50 | 685.00 | 1141.00 |  |
| 0.15                         | 3.108 | 0.3218169 | 0.0287890 | 1.00 | 1.10 | 427.352 | 423.147 | 52.00 | 129.00 | 303.00 | 588.00 | 970.10 | 3.276 | 594.871 | 586.660 | 69.00 | 175.00 | 416.00 | 816.00 | 1356.00 |  |
| 0.15                         | 3.108 | 0.3218169 | 0.0287890 | 1.00 | 1.20 | 368.407 | 353.868 | 45.00 | 113.00 | 260.00 | 517.00 | 838.00 | 3.276 | 511.500 | 496.564 | 60.00 | 152.00 | 362.00 | 709.00 | 1160.20 |  |
| 0.15                         | 3.108 | 0.3218169 | 0.0287890 | 1.00 | 1.30 | 272.224 | 266.166 | 35.00 | 83.00  | 189.00 | 374.00 | 620.00 | 3.276 | 390.645 | 380.225 | 49.00 | 120.00 | 275.00 | 539.00 | 894.00  |  |
| 0.15                         | 3.108 | 0.3218169 | 0.0287890 | 1.00 | 1.40 | 194.008 | 185.415 | 29.00 | 63.75  | 136.00 | 263.00 | 438.00 | 3.276 | 274.951 | 262.539 | 37.00 | 85.00  | 196.00 | 382.00 | 620.00  |  |
| 0.15                         | 3.108 | 0.3218169 | 0.0287890 | 1.00 | 0.90 | 203.955 | 200.114 | 27.00 | 64.00  | 144.00 | 280.00 | 463.00 | 3.276 | 267.324 | 262.340 | 35.00 | 81.00  | 187.00 | 365.00 | 605.00  |  |
| 0.15                         | 3.108 | 0.3218169 | 0.0287890 | 1.00 | 0.80 | 95.655  | 90.245  | 16.00 | 33.00  | 67.00  | 128.00 | 211.10 | 3.276 | 117.423 | 109.256 | 19.00 | 39.00  | 84.00  | 159.00 | 261.00  |  |
| 0.15                         | 3.108 | 0.3218169 | 0.0287890 | 1.00 | 0.70 | 46.139  | 39.634  | 10.00 | 18.00  | 35.00  | 61.00  | 96.00  | 3.276 | 53.811  | 46.917  | 12.00 | 21.00  | 39.00  | 72.00  | 115.00  |  |
| 0.15                         | 3.108 | 0.3218169 | 0.0287890 | 1.00 | 0.60 | 24.629  | 19.177  | 7.00  | 11.00  | 19.00  | 32.00  | 49.00  | 3.276 | 27.703  | 21.502  | 8.00  | 13.00  | 21.00  | 36.00  | 55.00   |  |
| 0.15                         | 3.108 | 0.3218169 | 0.0287890 | 1.00 | 0.50 | 15.021  | 10.218  | 5.00  | 8.00   | 12.00  | 19.00  | 28.00  | 3.276 | 16.000  | 10.938  | 6.00  | 8.00   | 13.00  | 20.00  | 30.00   |  |
| <b>Case 3</b>                |       |           |           |      |      |         |         |       |        |        |        |        |       |         |         |       |        |        |        |         |  |
| <b><math>\phi=80</math></b>  |       |           |           |      |      |         |         |       |        |        |        |        |       |         |         |       |        |        |        |         |  |
| 0.05                         | 2.707 | 0.1806445 | 0.0092291 | 1.00 | 1.00 | 370.278 | 351.550 | 53.00 | 117.00 | 257.00 | 512.00 | 834.00 | 2.887 | 500.015 | 480.233 | 66.00 | 154.00 | 350.00 | 690.00 | 1114.10 |  |
| 0.05                         | 2.707 | 0.1806445 | 0.0092291 | 1.00 | 1.10 | 308.177 | 287.177 | 50.00 | 102.00 | 222.00 | 418.00 | 680.00 | 2.887 | 403.114 | 388.953 | 59.90 | 132.00 | 286.00 | 543.00 | 895.10  |  |
| 0.05                         | 2.707 | 0.1806445 | 0.0092291 | 1.00 | 1.20 | 172.600 | 150.841 | 37.00 | 65.00  | 127.00 | 232.00 | 370.00 | 2.887 | 214.126 | 193.334 | 43.00 | 77.00  | 154.00 | 287.00 | 464.00  |  |
| 0.05                         | 2.707 | 0.1806445 | 0.0092291 | 1.00 | 1.30 | 103.749 | 81.632  | 29.00 | 46.00  | 80.00  | 136.00 | 210.00 | 2.887 | 121.726 | 97.725  | 33.   |        |        |        |         |  |

|      |       |           |           |      |      |         |         |       |        |        |        |        |       |         |         |       |        |        |        |         |
|------|-------|-----------|-----------|------|------|---------|---------|-------|--------|--------|--------|--------|-------|---------|---------|-------|--------|--------|--------|---------|
| 0.05 | 2.707 | 0.1806445 | 0.0092291 | 1.00 | 0.60 | 25.480  | 14.859  | 11.00 | 15.00  | 22.00  | 32.00  | 46.00  | 2.887 | 27.162  | 16.232  | 11.00 | 16.00  | 23.00  | 34.00  | 48.00   |
| 0.05 | 2.707 | 0.1806445 | 0.0092291 | 1.00 | 0.50 | 16.622  | 8.438   | 8.00  | 11.00  | 15.00  | 21.00  | 28.00  | 2.887 | 17.791  | 8.949   | 9.00  | 11.00  | 16.00  | 22.00  | 29.00   |
| 0.10 | 2.989 | 0.2591572 | 0.0188247 | 1.00 | 1.00 | 369.285 | 363.063 | 47.00 | 111.00 | 257.00 | 509.00 | 827.00 | 3.165 | 500.538 | 486.596 | 61.00 | 147.00 | 346.00 | 720.00 | 1148.00 |
| 0.10 | 2.989 | 0.2591572 | 0.0188247 | 1.00 | 1.10 | 379.340 | 371.163 | 48.00 | 113.00 | 263.00 | 525.25 | 862.10 | 3.165 | 525.371 | 520.336 | 65.00 | 155.00 | 363.00 | 728.00 | 1211.10 |
| 0.10 | 2.989 | 0.2591572 | 0.0188247 | 1.00 | 1.20 | 271.409 | 258.897 | 40.00 | 89.00  | 192.50 | 374.00 | 601.10 | 3.165 | 374.388 | 359.911 | 51.00 | 118.00 | 261.00 | 516.00 | 841.00  |
| 0.10 | 2.989 | 0.2591572 | 0.0188247 | 1.00 | 1.30 | 172.600 | 157.441 | 31.00 | 60.00  | 125.00 | 234.00 | 382.10 | 3.165 | 228.966 | 210.025 | 38.00 | 79.00  | 166.00 | 314.00 | 496.10  |
| 0.10 | 2.989 | 0.2591572 | 0.0188247 | 1.00 | 1.40 | 112.607 | 98.914  | 24.00 | 43.00  | 83.00  | 151.00 | 239.00 | 3.165 | 146.189 | 129.794 | 30.00 | 53.00  | 108.00 | 198.00 | 314.10  |
| 0.10 | 2.989 | 0.2591572 | 0.0188247 | 1.00 | 0.90 | 204.554 | 194.000 | 30.00 | 65.00  | 147.00 | 281.00 | 454.00 | 3.165 | 261.181 | 250.471 | 38.00 | 83.00  | 186.00 | 355.00 | 588.00  |
| 0.10 | 2.989 | 0.2591572 | 0.0188247 | 1.00 | 0.80 | 92.217  | 83.156  | 18.00 | 34.00  | 67.00  | 124.00 | 201.00 | 3.165 | 108.080 | 98.273  | 20.00 | 38.00  | 78.00  | 145.00 | 236.00  |
| 0.10 | 2.989 | 0.2591572 | 0.0188247 | 1.00 | 0.70 | 43.313  | 34.952  | 12.00 | 19.00  | 33.00  | 57.00  | 88.00  | 3.165 | 49.553  | 40.730  | 13.00 | 21.00  | 38.00  | 65.00  | 101.00  |
| 0.10 | 2.989 | 0.2591572 | 0.0188247 | 1.00 | 0.60 | 24.225  | 16.823  | 8.00  | 12.00  | 20.00  | 31.00  | 46.00  | 3.165 | 26.509  | 18.900  | 9.00  | 13.00  | 21.00  | 34.00  | 51.00   |
| 0.10 | 2.989 | 0.2591572 | 0.0188247 | 1.00 | 0.50 | 15.289  | 9.213   | 6.00  | 9.00   | 13.00  | 19.00  | 27.00  | 3.165 | 16.448  | 10.103  | 7.00  | 9.00   | 14.00  | 21.00  | 30.00   |
| 0.15 | 3.117 | 0.3219652 | 0.0288123 | 1.00 | 1.00 | 371.785 | 363.854 | 44.00 | 112.00 | 262.50 | 511.00 | 842.10 | 3.290 | 500.964 | 488.821 | 57.00 | 150.00 | 353.00 | 703.00 | 1142.00 |
| 0.15 | 3.117 | 0.3219652 | 0.0288123 | 1.00 | 1.10 | 426.393 | 419.958 | 50.00 | 127.00 | 299.00 | 587.25 | 963.10 | 3.290 | 613.205 | 603.415 | 73.00 | 186.00 | 432.00 | 840.00 | 1402.00 |
| 0.15 | 3.117 | 0.3219652 | 0.0288123 | 1.00 | 1.20 | 366.838 | 366.216 | 45.00 | 111.00 | 252.00 | 504.00 | 839.10 | 3.290 | 537.110 | 523.931 | 60.90 | 159.00 | 377.00 | 749.00 | 1226.00 |
| 0.15 | 3.117 | 0.3219652 | 0.0288123 | 1.00 | 1.30 | 281.206 | 272.333 | 38.00 | 89.00  | 198.00 | 385.00 | 633.00 | 3.290 | 396.937 | 390.806 | 52.00 | 123.00 | 280.00 | 537.00 | 893.00  |
| 0.15 | 3.117 | 0.3219652 | 0.0288123 | 1.00 | 1.40 | 198.138 | 184.537 | 30.00 | 65.00  | 141.00 | 274.00 | 434.00 | 3.290 | 277.990 | 263.809 | 39.00 | 89.00  | 196.00 | 379.00 | 628.00  |
| 0.15 | 3.117 | 0.3219652 | 0.0288123 | 1.00 | 0.90 | 212.531 | 205.535 | 28.00 | 66.00  | 149.50 | 294.00 | 482.00 | 3.290 | 275.415 | 271.194 | 34.00 | 83.00  | 191.00 | 381.00 | 626.10  |
| 0.15 | 3.117 | 0.3219652 | 0.0288123 | 1.00 | 0.80 | 98.714  | 92.550  | 16.00 | 33.00  | 70.00  | 135.00 | 218.00 | 3.290 | 119.395 | 112.384 | 18.90 | 39.00  | 86.00  | 161.00 | 264.00  |
| 0.15 | 3.117 | 0.3219652 | 0.0288123 | 1.00 | 0.70 | 46.733  | 40.389  | 10.00 | 18.00  | 35.00  | 62.00  | 99.00  | 3.290 | 54.055  | 48.029  | 11.00 | 20.00  | 40.00  | 72.00  | 116.00  |
| 0.15 | 3.117 | 0.3219652 | 0.0288123 | 1.00 | 0.60 | 24.984  | 19.260  | 7.00  | 12.00  | 19.00  | 33.00  | 50.00  | 3.290 | 28.037  | 22.252  | 8.00  | 12.00  | 22.00  | 36.00  | 58.00   |
| 0.15 | 3.117 | 0.3219652 | 0.0288123 | 1.00 | 0.50 | 14.887  | 10.160  | 5.00  | 8.00   | 12.00  | 19.00  | 28.00  | 3.290 | 15.946  | 10.823  | 6.00  | 8.00   | 13.00  | 20.00  | 30.00   |

**Case 4  
 $\phi=31$**

|      |       |           |           |      |      |         |         |       |        |        |        |         |       |         |         |       |        |        |        |         |
|------|-------|-----------|-----------|------|------|---------|---------|-------|--------|--------|--------|---------|-------|---------|---------|-------|--------|--------|--------|---------|
| 0.05 | 2.704 | 0.1807397 | 0.0092360 | 1.00 | 1.00 | 370.431 | 354.684 | 54.00 | 118.00 | 261.00 | 511.00 | 821.10  | 2.898 | 500.250 | 473.620 | 68.00 | 158.00 | 352.00 | 690.00 | 1129.10 |
| 0.05 | 2.704 | 0.1807397 | 0.0092360 | 1.00 | 1.10 | 301.984 | 282.105 | 48.00 | 103.00 | 216.00 | 408.00 | 667.00  | 2.898 | 408.661 | 387.105 | 64.00 | 136.00 | 294.00 | 550.00 | 907.10  |
| 0.05 | 2.704 | 0.1807397 | 0.0092360 | 1.00 | 1.20 | 176.874 | 154.790 | 38.00 | 68.00  | 130.50 | 238.00 | 379.00  | 2.898 | 216.626 | 189.441 | 44.00 | 81.00  | 159.00 | 295.00 | 464.00  |
| 0.05 | 2.704 | 0.1807397 | 0.0092360 | 1.00 | 1.30 | 104.442 | 83.151  | 30.00 | 46.00  | 79.00  | 139.00 | 213.00  | 2.898 | 123.527 | 97.744  | 33.00 | 53.00  | 95.00  | 164.00 | 256.00  |
| 0.05 | 2.704 | 0.1807397 | 0.0092360 | 1.00 | 1.40 | 69.378  | 47.946  | 24.00 | 36.00  | 56.00  | 89.00  | 131.00  | 2.898 | 79.943  | 56.900  | 27.00 | 39.00  | 64.00  | 104.00 | 154.00  |
| 0.05 | 2.704 | 0.1807397 | 0.0092360 | 1.00 | 0.90 | 197.785 | 183.616 | 35.00 | 68.00  | 141.00 | 269.00 | 436.10  | 2.898 | 244.876 | 223.332 | 42.00 | 85.00  | 177.00 | 335.00 | 538.00  |
| 0.05 | 2.704 | 0.1807397 | 0.0092360 | 1.00 | 0.80 | 83.505  | 67.482  | 21.00 | 35.00  | 65.00  | 111.00 | 172.00  | 2.898 | 97.452  | 79.500  | 24.00 | 41.00  | 74.00  | 129.00 | 201.00  |
| 0.05 | 2.704 | 0.1807397 | 0.0092360 | 1.00 | 0.70 | 43.103  | 29.969  | 15.00 | 22.00  | 35.00  | 54.00  | 82.00   | 2.898 | 47.175  | 33.228  | 16.00 | 24.00  | 38.00  | 61.00  | 91.00   |
| 0.05 | 2.704 | 0.1807397 | 0.0092360 | 1.00 | 0.60 | 25.521  | 14.896  | 11.00 | 15.00  | 22.00  | 32.00  | 45.00   | 2.898 | 27.302  | 15.985  | 11.00 | 16.00  | 24.00  | 34.00  | 48.00   |
| 0.05 | 2.704 | 0.1807397 | 0.0092360 | 1.00 | 0.50 | 16.798  | 8.548   | 8.00  | 11.00  | 15.00  | 21.00  | 28.00   | 2.898 | 18.064  | 9.149   | 9.00  | 11.00  | 16.00  | 22.00  | 30.00   |
| 0.10 | 2.992 | 0.2594297 | 0.0188990 | 1.00 | 1.00 | 370.488 | 362.731 | 45.00 | 111.75 | 259.00 | 513.00 | 849.00  | 3.165 | 500.660 | 496.742 | 62.00 | 151.00 | 350.00 | 680.25 | 1146.10 |
| 0.10 | 2.992 | 0.2594297 | 0.0188990 | 1.00 | 1.10 | 380.166 | 363.381 | 49.00 | 119.00 | 269.00 | 529.00 | 860.00  | 3.165 | 529.039 | 518.793 | 66.00 | 164.00 | 370.00 | 726.00 | 1200.00 |
| 0.10 | 2.992 | 0.2594297 | 0.0188990 | 1.00 | 1.20 | 271.166 | 260.337 | 39.00 | 85.75  | 194.00 | 369.00 | 606.00  | 3.165 | 369.257 | 355.880 | 51.00 | 115.00 | 261.00 | 508.00 | 836.00  |
| 0.10 | 2.992 | 0.2594297 | 0.0188990 | 1.00 | 1.30 | 175.345 | 163.944 | 30.00 | 59.00  | 125.00 | 239.00 | 394.00  | 3.165 | 229.966 | 211.001 | 38.00 | 78.00  | 165.00 | 316.00 | 516.00  |
| 0.10 | 2.992 | 0.2594297 | 0.0188990 | 1.00 | 1.40 | 115.250 | 101.546 | 24.00 | 43.00  | 84.00  | 155.00 | 251.10  | 3.165 | 145.516 | 132.407 | 29.00 | 53.00  | 106.00 | 194.00 | 314.00  |
| 0.10 | 2.992 | 0.2594297 | 0.0188990 | 1.00 | 0.90 | 208.268 | 200.435 | 32.00 | 68.00  | 145.00 | 286.00 | 473.00  | 3.165 | 260.249 | 251.282 | 36.00 | 80.00  | 182.00 | 359.00 | 590.10  |
| 0.10 | 2.992 | 0.2594297 | 0.0188990 | 1.00 | 0.80 | 92.233  | 83.986  | 17.00 | 32.00  | 67.00  | 124.00 | 203.00  | 3.165 | 109.656 | 100.804 | 20.00 | 39.00  | 79.00  | 150.00 | 240.00  |
| 0.10 | 2.992 | 0.2594297 | 0.0188990 | 1.00 | 0.70 | 44.135  | 35.454  | 12.00 | 19.00  | 34.00  | 58.00  | 91.00   | 3.165 | 49.482  | 40.556  | 13.00 | 21.00  | 37.00  | 65.00  | 103.00  |
| 0.10 | 2.992 | 0.2594297 | 0.0188990 | 1.00 | 0.60 | 24.816  | 17.549  | 8.00  | 12.00  | 20.00  | 32.00  | 48.00   | 3.165 | 26.643  | 19.056  | 9.00  | 13.00  | 21.00  | 34.00  | 52.00   |
| 0.10 | 2.992 | 0.2594297 | 0.0188990 | 1.00 | 0.50 | 15.150  | 9.068   | 6.00  | 9.00   | 13.00  | 19.00  | 27.00   | 3.165 | 16.422  | 10.039  | 7.00  | 9.00   | 14.00  | 21.00  | 30.00   |
| 0.15 | 3.138 | 0.3220597 | 0.0288483 | 1.00 | 1.00 | 370.824 | 363.596 | 44.00 | 108.00 | 259.00 | 518.00 | 850.00  | 3.299 | 500.344 | 494.834 | 56.90 | 145.00 | 341.00 | 706.00 | 1147.00 |
| 0.15 | 3.138 | 0.3220597 | 0.0288483 | 1.00 | 1.10 | 446.246 | 438.424 | 54.00 | 134.00 | 308.00 | 617.00 | 1028.10 | 3.299 | 591.946 | 586.603 | 71.00 | 179.00 | 411.00 | 811.00 | 1342.00 |
| 0.15 | 3.138 | 0.3220597 | 0.0288483 | 1.00 | 1.20 | 380.876 | 370.674 | 48.00 | 114.00 | 269.00 | 532.00 | 871.00  | 3.299 | 526.476 | 514.400 | 64.00 | 158.00 | 370.00 | 722.00 | 1197.00 |
| 0.15 | 3.138 | 0.3220597 | 0.0288483 | 1.00 | 1.30 | 281.518 | 269.412 | 36.00 | 87.75  | 199.00 | 394.00 | 631.00  | 3.299 | 395.303 | 386.066 | 50.00 | 120.00 | 280.00 | 544.25 | 903.10  |
| 0.15 | 3.138 | 0.3220597 | 0.0288483 | 1.00 | 1.40 | 204.023 | 195.605 | 30.00 | 65.00  | 144.00 | 276.00 | 465.10  | 3.299 | 285.009 | 271.519 | 41.00 | 91.00  | 203.00 | 393.25 | 638.00  |
| 0.15 | 3.138 | 0.3220597 | 0.0288483 | 1.00 | 0.90 | 216.624 | 213.140 | 28.00 | 67.00  | 151.00 | 300.00 | 496.00  | 3.299 | 274.475 | 262.748 | 36.00 | 85.00  | 196.00 | 374.00 | 631.00  |
| 0.15 | 3.138 | 0.3220597 | 0.0288483 | 1.00 | 0.80 | 101.768 | 95.896  | 17.00 | 34.00  | 72.00  | 139.00 | 224.00  | 3.299 | 121.522 | 114.240 | 19.00 | 40.00  | 86.00  | 164.00 | 274.00  |
| 0.15 | 3.138 | 0.3220597 | 0.0288483 | 1.00 | 0.70 | 47.408  | 41.361  | 10.00 | 18.00  | 35.00  | 63.00  | 101.00  | 3.299 | 54.737  | 47.697  | 12.00 | 21.00  | 40.00  | 74.00  | 117.00  |
| 0.15 | 3.138 | 0.3220597 | 0.0288483 | 1.00 | 0.60 | 25.117  | 19.225  | 7.00  | 12.00  | 19.00  | 33.00  | 51.00   | 3.299 | 27.881  | 22.314  | 8.00  | 12.00  | 21.00  | 36.00  | 56.00   |
| 0.15 | 3.138 | 0.3220597 | 0.0288483 | 1.00 | 0.50 | 15.105  | 10.124  | 6.00  | 8.00   | 12.00  | 19.00  | 28.00   | 3.299 | 16.187  | 10.933  | 6.00  | 8.00   | 13.00  | 21.00  | 30.00   |

TABLE S.7. ARL Results of the Max-EWMA control chart when simultaneous shift occurs in the shape1 parameter of beta distribution and rate parameter of UNH distribution ( $\Delta_\gamma \in (1.0, 1.1, 1.2, 1.3, 1.4, 0.9, 0.8, 0.7, 0.6, 0.5)$ ,  $\Delta_\lambda \in (1.0, 1.1, 1.2, 1.3, 1.4, 0.9, 0.8, 0.7, 0.6, 0.5)$  when  $X \sim B(\gamma, \delta)$ ,  $T \sim UNH(\alpha, \lambda)$ ,  $\mu = 0.20$ ,  $\alpha_0 = 1.50$ ,  $\lambda_0 = 1.00$   $ARL_0 \in (370, 500)$  and  $\theta_e \in (0.05, 0.10, 0.15)$

| $\theta_e$ | $K$   | $EM$      | $VM$      | $\Delta_\gamma$ | $\Delta_\lambda$ | $ARL$   | $SDRL$  | $q10$ | $q25$  | $q50$  | $q75$  | $q90$  | $K$           | $ARL$   | $SDRL$  | $q10$ | $q25$  | $q50$  | $q75$  | $q90$   |               |  |  |  |  |  |  |  |
|------------|-------|-----------|-----------|-----------------|------------------|---------|---------|-------|--------|--------|--------|--------|---------------|---------|---------|-------|--------|--------|--------|---------|---------------|--|--|--|--|--|--|--|
|            |       |           |           |                 |                  |         |         |       |        |        |        |        | $ARL_0 = 370$ |         |         |       |        |        |        |         | $ARL_0 = 500$ |  |  |  |  |  |  |  |
| Case 1     |       |           |           |                 |                  |         |         |       |        |        |        |        |               |         |         |       |        |        |        |         |               |  |  |  |  |  |  |  |
| $\phi=290$ |       |           |           |                 |                  |         |         |       |        |        |        |        |               |         |         |       |        |        |        |         |               |  |  |  |  |  |  |  |
| 0.05       | 2.687 | 0.1808245 | 0.0092612 | 1.00            | 1.00             | 370.125 | 351.717 | 53.00 | 117.00 | 263.00 | 512.25 | 821.00 | 2.887         | 500.934 | 478.084 | 67.00 | 160.00 | 356.00 | 695.00 | 1128.00 |               |  |  |  |  |  |  |  |
| 0.05       | 2.687 | 0.1808245 | 0.0092612 | 1.10            | 1.10             | 20.591  | 10.015  | 10.00 | 13.00  | 18.00  | 25.00  | 34.00  | 2.887         | 21.881  | 10.444  | 11.00 | 14.00  | 20.00  | 27.00  | 36.00   |               |  |  |  |  |  |  |  |
| 0.05       | 2.687 | 0.1808245 | 0.0092612 | 1.20            | 1.10             | 8.786   | 2.818   | 6.00  | 7.00   | 8.00   | 10.00  | 12.10  | 2.887         | 9.095   | 2.835   | 6.00  | 7.00   | 9.00   | 11.00  | 13.00   |               |  |  |  |  |  |  |  |
| 0.05       | 2.687 | 0.1808245 | 0.0092612 | 1.30            | 1.10             | 5.726   | 1.466   | 4.00  | 5.00   | 6.00   | 7.00   | 8.00   | 2.887         | 5.949   | 1.471   | 4.00  | 5.00   | 6.00   | 7.00   | 8.00    |               |  |  |  |  |  |  |  |
| 0.05       | 2.687 | 0.1808245 | 0.0092612 | 1.40            | 1.10             | 4.310   | 0.951   | 3.00  | 4.00   | 4.00   | 5.00   | 6.00   | 2.887         | 4.512   | 0.995   | 3.00  | 4.00   | 4.00   | 5.00   | 6.00    |               |  |  |  |  |  |  |  |
| 0.05       | 2.687 | 0.1808245 | 0.0092612 | 0.90            | 1.10             | 19.384  | 8.875   | 10.00 | 13.00  | 18.00  | 24.00  | 31.00  | 2.887         | 20.552  | 9.361   | 11.00 | 14.00  | 19.00  | 25.00  | 33.00   |               |  |  |  |  |  |  |  |
| 0.05       | 2.687 | 0.1808245 | 0.0092612 | 0.80            | 1.10             | 7.933   | 2.269   | 5.00  | 6.00   | 8.00   | 9.00   | 11.00  | 2.887         | 8.306   | 2.279   | 6.00  | 7.00   | 8.00   | 10.00  | 11.00   |               |  |  |  |  |  |  |  |
| 0.05       | 2.687 | 0.1808245 | 0.0092612 | 0.70            | 1.10             | 5.002   | 1.066   | 4.00  | 4.00   | 5.00   | 6.00   | 6.00   | 2.887         | 5.219   | 1.098   | 4.00  | 4.00   | 5.00   | 6.00   | 7.00    |               |  |  |  |  |  |  |  |
| 0.05       | 2.687 | 0.1808245 | 0.0092612 | 0.60            | 1.10             | 3.676   | 0.660   | 3.00  | 3.00   | 4.00   | 4.00   | 4.00   | 2.887         | 3.826   | 0.682   | 3.00  | 3.00   | 4.00   | 4.00   | 5.00    |               |  |  |  |  |  |  |  |
| 0.05       | 2.687 | 0.1808245 | 0.0092612 | 0.50            | 1.10             | 2.967   | 0.424   | 2.00  | 3.00   | 3.00   | 3.00   | 3.00   | 2.887         | 3.069   | 0.408   | 3.00  | 3.00   | 3.00   | 3.00   | 4.00    |               |  |  |  |  |  |  |  |
| 0.05       | 2.687 | 0.1808245 | 0.0092612 | 1.10            | 1.20             | 20.420  | 9.740   | 10.00 | 13.00  | 18.00  | 25.00  | 33.00  | 2.887         | 21.823  | 10.314  | 11.00 | 14.00  | 20.00  | 27.00  | 36.00   |               |  |  |  |  |  |  |  |
| 0.05       | 2.687 | 0.1808245 | 0.0092612 | 1.20            | 1.20             | 8.745   | 2.805   | 6.00  | 7.00   | 8.00   | 10.00  | 12.00  | 2.887         | 9.132   | 2.856   | 6.00  | 7.00   | 9.00   | 11.00  | 13.00   |               |  |  |  |  |  |  |  |
| 0.05       | 2.687 | 0.1808245 | 0.0092612 | 1.30            | 1.20             | 5.721   | 1.466   | 4.00  | 5.00   | 6.00   | 7.00   | 8.00   | 2.887         | 5.954   | 1.488   | 4.00  | 5.00   | 6.00   | 7.00   | 8.00    |               |  |  |  |  |  |  |  |
| 0.05       | 2.687 | 0.1808245 | 0.0092612 | 1.40            | 1.20             | 4.328   | 0.959   | 3.00  | 4.00   | 4.00   | 5.00   | 6.00   | 2.887         | 4.536   | 0.988   | 3.00  | 4.00   | 4.00   | 5.00   | 6.00    |               |  |  |  |  |  |  |  |
| 0.05       | 2.687 | 0.1808245 | 0.0092612 | 0.90            | 1.20             | 19.353  | 8.606   | 10.00 | 13.00  | 18.00  | 24.00  | 31.00  | 2.887         | 20.582  | 9.185   | 11.00 | 14.00  | 19.00  | 25.00  | 33.00   |               |  |  |  |  |  |  |  |
| 0.05       | 2.687 | 0.1808245 | 0.0092612 | 0.80            | 1.20             | 7.954   | 2.276   | 5.00  | 6.00   | 8.00   | 9.00   | 11.00  | 2.887         | 8.310   | 2.325   | 6.00  | 7.00   | 8.00   | 10.00  | 11.00   |               |  |  |  |  |  |  |  |
| 0.05       | 2.687 | 0.1808245 | 0.0092612 | 0.70            | 1.20             | 4.996   | 1.073   | 4.00  | 4.00   | 5.00   | 6.00   | 6.00   | 2.887         | 5.218   | 1.101   | 4.00  | 4.00   | 5.00   | 6.00   | 7.00    |               |  |  |  |  |  |  |  |
| 0.05       | 2.687 | 0.1808245 | 0.0092612 | 0.60            | 1.20             | 3.655   | 0.649   | 3.00  | 3.00   | 4.00   | 4.00   | 4.00   | 2.887         | 3.825   | 0.668   | 3.00  | 3.00   | 4.00   | 4.00   | 5.00    |               |  |  |  |  |  |  |  |
| 0.05       | 2.687 | 0.1808245 | 0.0092612 | 0.50            | 1.20             | 2.975   | 0.418   | 3.00  | 3.00   | 3.00   | 3.00   | 3.00   | 2.887         | 3.064   | 0.411   | 3.00  | 3.00   | 3.00   | 3.00   | 4.00    |               |  |  |  |  |  |  |  |
| 0.05       | 2.687 | 0.1808245 | 0.0092612 | 1.10            | 1.30             | 20.151  | 9.522   | 10.00 | 13.00  | 18.00  | 25.00  | 33.00  | 2.887         | 21.666  | 10.301  | 11.00 | 14.00  | 19.00  | 27.00  | 35.00   |               |  |  |  |  |  |  |  |
| 0.05       | 2.687 | 0.1808245 | 0.0092612 | 1.20            | 1.30             | 8.739   | 2.812   | 6.00  | 7.00   | 8.00   | 10.00  | 12.00  | 2.887         | 9.187   | 2.911   | 6.00  | 7.00   | 9.00   | 11.00  | 13.00   |               |  |  |  |  |  |  |  |
| 0.05       | 2.687 | 0.1808245 | 0.0092612 | 1.30            | 1.30             | 5.694   | 1.461   | 4.00  | 5.00   | 6.00   | 7.00   | 8.00   | 2.887         | 5.968   | 1.505   | 4.00  | 5.00   | 6.00   | 7.00   | 8.00    |               |  |  |  |  |  |  |  |
| 0.05       | 2.687 | 0.1808245 | 0.0092612 | 1.40            | 1.30             | 4.327   | 0.954   | 3.00  | 4.00   | 4.00   | 5.00   | 6.00   | 2.887         | 4.501   | 0.977   | 3.00  | 4.00   | 4.00   | 5.00   | 6.00    |               |  |  |  |  |  |  |  |
| 0.05       | 2.687 | 0.1808245 | 0.0092612 | 0.90            | 1.30             | 19.005  | 8.407   | 10.00 | 13.00  | 17.00  | 23.00  | 30.00  | 2.887         | 20.432  | 9.111   | 11.00 | 14.00  | 19.00  | 25.00  | 32.00   |               |  |  |  |  |  |  |  |
| 0.05       | 2.687 | 0.1808245 | 0.0092612 | 0.80            | 1.30             | 7.913   | 2.223   | 5.00  | 6.00   | 8.00   | 9.00   | 11.00  | 2.887         | 8.316   | 2.310   | 6.00  | 7.00   | 8.00   | 10.00  | 11.00   |               |  |  |  |  |  |  |  |
| 0.05       | 2.687 | 0.1808245 | 0.0092612 | 0.70            | 1.30             | 5.003   | 1.075   | 4.00  | 4.00   | 5.00   | 6.00   | 6.00   | 2.887         | 5.229   | 1.103   | 4.00  | 4.00   | 5.00   | 6.00   | 7.00    |               |  |  |  |  |  |  |  |
| 0.05       | 2.687 | 0.1808245 | 0.0092612 | 0.60            | 1.30             | 3.678   | 0.648   | 3.00  | 3.00   | 4.00   | 4.00   | 4.00   | 2.887         | 3.829   | 0.680   | 3.00  | 3.00   | 4.00   | 4.00   | 5.00    |               |  |  |  |  |  |  |  |
| 0.05       | 2.687 | 0.1808245 | 0.0092612 | 0.50            | 1.30             | 2.963   | 0.426   | 2.00  | 3.00   | 3.00   | 3.00   | 3.00   | 2.887         | 3.065   | 0.410   | 3.00  | 3.00   | 3.00   | 3.00   | 4.00    |               |  |  |  |  |  |  |  |
| 0.05       | 2.687 | 0.1808245 | 0.0092612 | 1.10            | 1.40             | 19.614  | 9.037   | 10.00 | 13.00  | 18.00  | 24.00  | 31.00  | 2.887         | 21.293  | 9.816   | 11.00 | 14.00  | 19.00  | 26.00  | 34.00   |               |  |  |  |  |  |  |  |
| 0.05       | 2.687 | 0.1808245 | 0.0092612 | 1.20            | 1.40             | 8.777   | 2.801   | 6.00  | 7.00   | 8.00   | 10.00  | 12.00  | 2.887         | 9.192   | 2.875   | 6.00  | 7.00   | 9.00   | 11.00  | 13.00   |               |  |  |  |  |  |  |  |
| 0.05       | 2.687 | 0.1808245 | 0.0092612 | 1.30            | 1.40             | 5.718   | 1.477   | 4.00  | 5.00   | 6.00   | 7.00   | 8.00   | 2.887         | 5.952   | 1.498   | 4.00  | 5.00   | 6.00   | 7.00   | 8.00    |               |  |  |  |  |  |  |  |
| 0.05       | 2.687 | 0.1808245 | 0.0092612 | 1.40            | 1.40             | 4.322   | 0.940   | 3.00  | 4.00   | 4.00   | 5.00   | 5.00   | 2.887         | 4.518   | 0.979   | 3.00  | 4.00   | 4.00   | 5.00   | 6.00    |               |  |  |  |  |  |  |  |
| 0.05       | 2.687 | 0.1808245 | 0.0092612 | 0.90            | 1.40             | 18.789  | 8.203   | 10.00 | 13.00  | 17.00  | 23.00  | 30.00  | 2.887         | 19.985  | 8.611   | 11.00 | 14.00  | 18.00  | 24.00  | 31.00   |               |  |  |  |  |  |  |  |
| 0.05       | 2.687 | 0.1808245 | 0.0092612 | 0.80            | 1.40             | 7.925   | 2.230   | 5.00  | 6.00   | 8.00   | 9.00   | 11.00  | 2.887         | 8.291   | 2.300   | 6.00  | 7.00   | 8.00   | 10.00  | 11.00   |               |  |  |  |  |  |  |  |
| 0.05       | 2.687 | 0.1808245 | 0.0092612 | 0.70            | 1.40             | 4.999   | 1.065   | 4.00  | 4.00   | 5.00   | 6.00   | 6.00   | 2.887         | 5.222   | 1.090   | 4.00  | 4.00   | 5.00   | 6.00   | 7.00    |               |  |  |  |  |  |  |  |
| 0.05       | 2.687 | 0.1808245 | 0.0092612 | 0.60            | 1.40             | 3.672   | 0.661   | 3.00  | 3.00   | 4.00   | 4.00   | 4.00   | 2.887         | 3.815   | 0.671   | 3.00  | 3.00   | 4.00   | 4.00   | 5.00    |               |  |  |  |  |  |  |  |
| 0.05       | 2.687 | 0.1808245 | 0.0092612 | 0.50            | 1.40             | 2.968   | 0.429   | 2.00  | 3.00   | 3.00   | 3.00   | 3.00   | 2.887         | 3.068   | 0.414   | 3.00  | 3.00   | 3.00   | 3.00   | 4.00    |               |  |  |  |  |  |  |  |
| 0.05       | 2.687 | 0.1808245 | 0.0092612 | 1.10            | 0.90             | 20.482  | 10.011  | 10.00 | 13.00  | 18.00  | 25.00  | 34.00  | 2.887         | 21.717  | 10.541  | 11.00 | 14.00  | 19.00  | 27.00  | 35.00   |               |  |  |  |  |  |  |  |
| 0.05       | 2.687 | 0.1808245 | 0.0092612 | 1.20            | 0.90             | 8.790   | 2.805   | 6.00  | 7.00   | 8.00   | 10.00  | 12.00  | 2.887         | 9.251   | 2.926   | 6.00  | 7.00   | 9.00   | 11.00  | 13.00   |               |  |  |  |  |  |  |  |
| 0.05       | 2.687 | 0.1808245 | 0.0092612 | 1.30            | 0.90             | 5.709   | 1.460   | 4.00  | 5.00   | 6.00   | 7.00   | 8.00   | 2.887         | 5.970   | 1.502   | 4.00  | 5.00   | 6.00   | 7.00   | 8.00    |               |  |  |  |  |  |  |  |
| 0.05       | 2.687 | 0.1808245 | 0.0092612 | 1.40            | 0.90             | 4.321   | 0.950   | 3.00  | 4.00   | 4.00   | 5.00   | 6.00   | 2.887         | 4.526   | 0.986   | 3.00  | 4.00   | 4.00   | 5.00   | 6.00    |               |  |  |  |  |  |  |  |
| 0.05       | 2.687 | 0.1808245 | 0.0092612 | 0.90            | 0.90             | 19.234  | 8.637   | 10.00 | 13.00  | 17.00  | 23.00  | 31.00  | 2.887         | 20.489  | 9.244   | 11.00 | 14.00  | 19.00  | 25.00  | 33.00   |               |  |  |  |  |  |  |  |
| 0.05       | 2.687 | 0.1808245 | 0.0092612 | 0.80            | 0.90             | 7.947   | 2.210   | 5.00  | 6.00   | 8.00   | 9.00   | 11.00  | 2.887         | 8.336   | 2.286   | 6.00  | 7.00   | 8.00   | 10.00  | 11.00   |               |  |  |  |  |  |  |  |
| 0.05       | 2.687 | 0.1808245 | 0.0092612 | 0.70            | 0.90             | 5.010   | 1.067   | 4.00  | 4.00   | 5.00   | 6.00   | 6.00   | 2.887         | 5.218   | 1.096   | 4.00  | 4.00   | 5.00   | 6.00   | 7.00    |               |  |  |  |  |  |  |  |
| 0.05       | 2.687 | 0.1808245 | 0.0092612 | 0.60            | 0.90             | 3.660   | 0.661   | 3.00  | 3.00   | 4.00   | 4.00   | 4.00   | 2.887         | 3.821   | 0.681   | 3.00  | 3.00   | 4.00   | 4.00   | 5.00    |               |  |  |  |  |  |  |  |
| 0.05       | 2.687 | 0.1808245 | 0.0092612 | 0.50            | 0.90             | 2.966   | 0.423   | 2.00  | 3.00   | 3.00   | 3.00   | 3.00   | 2.887         | 3.070   | 0.414   | 3.00  | 3.00   | 3.00   | 3.00   | 4.00    |               |  |  |  |  |  |  |  |
| 0.05       | 2.687 | 0.1808245 | 0.0092612 | 1.10            | 0.80             | 19.600  | 9.358   | 10.00 | 13.00  | 18.00  | 24.00  | 32.00  | 2.887         | 21.067  | 9.930   | 11.00 | 14.00  | 19.00  | 26.00  | 34.00   |               |  |  |  |  |  |  |  |

|      |       |           |           |      |      |         |         |       |        |        |        |        |       |         |         |       |        |        |        |         |
|------|-------|-----------|-----------|------|------|---------|---------|-------|--------|--------|--------|--------|-------|---------|---------|-------|--------|--------|--------|---------|
| 0.05 | 2.687 | 0.1808245 | 0.0092612 | 1.20 | 0.80 | 8.702   | 2.741   | 6.00  | 7.00   | 8.00   | 10.00  | 12.00  | 2.887 | 9.132   | 2.870   | 6.00  | 7.00   | 9.00   | 11.00  | 13.00   |
| 0.05 | 2.687 | 0.1808245 | 0.0092612 | 1.30 | 0.80 | 5.701   | 1.454   | 4.00  | 5.00   | 6.00   | 7.00   | 8.00   | 2.887 | 5.974   | 1.513   | 4.00  | 5.00   | 6.00   | 7.00   | 8.00    |
| 0.05 | 2.687 | 0.1808245 | 0.0092612 | 1.40 | 0.80 | 4.329   | 0.965   | 3.00  | 4.00   | 4.00   | 5.00   | 6.00   | 2.887 | 4.511   | 0.983   | 3.00  | 4.00   | 4.00   | 5.00   | 6.00    |
| 0.05 | 2.687 | 0.1808245 | 0.0092612 | 0.90 | 0.80 | 18.682  | 8.292   | 10.00 | 13.00  | 17.00  | 23.00  | 30.00  | 2.887 | 19.829  | 8.761   | 11.00 | 14.00  | 18.00  | 24.00  | 32.00   |
| 0.05 | 2.687 | 0.1808245 | 0.0092612 | 0.80 | 0.80 | 7.931   | 2.239   | 5.00  | 6.00   | 8.00   | 9.00   | 11.00  | 2.887 | 8.311   | 2.263   | 6.00  | 7.00   | 8.00   | 10.00  | 11.00   |
| 0.05 | 2.687 | 0.1808245 | 0.0092612 | 0.70 | 0.80 | 4.999   | 1.054   | 4.00  | 4.00   | 5.00   | 6.00   | 6.00   | 2.887 | 5.216   | 1.094   | 4.00  | 4.00   | 5.00   | 6.00   | 7.00    |
| 0.05 | 2.687 | 0.1808245 | 0.0092612 | 0.60 | 0.80 | 3.673   | 0.656   | 3.00  | 3.00   | 4.00   | 4.00   | 4.00   | 2.887 | 3.834   | 0.679   | 3.00  | 3.00   | 4.00   | 4.00   | 5.00    |
| 0.05 | 2.687 | 0.1808245 | 0.0092612 | 0.50 | 0.80 | 2.963   | 0.425   | 2.00  | 3.00   | 3.00   | 3.00   | 3.00   | 2.887 | 3.070   | 0.409   | 3.00  | 3.00   | 3.00   | 3.00   | 4.00    |
| 0.05 | 2.687 | 0.1808245 | 0.0092612 | 1.10 | 0.70 | 18.376  | 8.266   | 10.00 | 12.00  | 17.00  | 22.00  | 29.00  | 2.887 | 19.671  | 8.804   | 10.00 | 13.00  | 18.00  | 24.00  | 31.00   |
| 0.05 | 2.687 | 0.1808245 | 0.0092612 | 1.20 | 0.70 | 8.682   | 2.755   | 6.00  | 7.00   | 8.00   | 10.00  | 12.00  | 2.887 | 9.200   | 2.890   | 6.00  | 7.00   | 9.00   | 11.00  | 13.00   |
| 0.05 | 2.687 | 0.1808245 | 0.0092612 | 1.30 | 0.70 | 5.703   | 1.463   | 4.00  | 5.00   | 6.00   | 7.00   | 8.00   | 2.887 | 5.992   | 1.502   | 4.00  | 5.00   | 6.00   | 7.00   | 8.00    |
| 0.05 | 2.687 | 0.1808245 | 0.0092612 | 1.40 | 0.70 | 4.330   | 0.955   | 3.00  | 4.00   | 4.00   | 5.00   | 6.00   | 2.887 | 4.512   | 0.978   | 3.00  | 4.00   | 4.00   | 5.00   | 6.00    |
| 0.05 | 2.687 | 0.1808245 | 0.0092612 | 0.90 | 0.70 | 17.675  | 7.566   | 10.00 | 12.00  | 16.00  | 22.00  | 28.00  | 2.887 | 18.695  | 7.925   | 10.00 | 13.00  | 17.00  | 23.00  | 29.00   |
| 0.05 | 2.687 | 0.1808245 | 0.0092612 | 0.80 | 0.70 | 7.928   | 2.196   | 5.00  | 6.00   | 8.00   | 9.00   | 11.00  | 2.887 | 8.250   | 2.250   | 6.00  | 7.00   | 8.00   | 10.00  | 11.00   |
| 0.05 | 2.687 | 0.1808245 | 0.0092612 | 0.70 | 0.70 | 4.999   | 1.041   | 4.00  | 4.00   | 5.00   | 6.00   | 6.00   | 2.887 | 5.215   | 1.089   | 4.00  | 4.00   | 5.00   | 6.00   | 7.00    |
| 0.05 | 2.687 | 0.1808245 | 0.0092612 | 0.60 | 0.70 | 3.665   | 0.651   | 3.00  | 3.00   | 4.00   | 4.00   | 4.00   | 2.887 | 3.821   | 0.674   | 3.00  | 3.00   | 4.00   | 4.00   | 5.00    |
| 0.05 | 2.687 | 0.1808245 | 0.0092612 | 0.50 | 0.70 | 2.968   | 0.425   | 2.00  | 3.00   | 3.00   | 3.00   | 3.00   | 2.887 | 3.062   | 0.412   | 3.00  | 3.00   | 3.00   | 3.00   | 4.00    |
| 0.05 | 2.687 | 0.1808245 | 0.0092612 | 1.10 | 0.60 | 16.238  | 6.914   | 9.00  | 11.00  | 15.00  | 20.00  | 25.00  | 2.887 | 17.364  | 7.302   | 9.00  | 12.00  | 16.00  | 21.00  | 27.00   |
| 0.05 | 2.687 | 0.1808245 | 0.0092612 | 1.20 | 0.60 | 8.595   | 2.645   | 6.00  | 7.00   | 8.00   | 10.00  | 12.00  | 2.887 | 9.046   | 2.776   | 6.00  | 7.00   | 9.00   | 11.00  | 13.00   |
| 0.05 | 2.687 | 0.1808245 | 0.0092612 | 1.30 | 0.60 | 5.714   | 1.441   | 4.00  | 5.00   | 6.00   | 7.00   | 8.00   | 2.887 | 5.925   | 1.471   | 4.00  | 5.00   | 6.00   | 7.00   | 8.00    |
| 0.05 | 2.687 | 0.1808245 | 0.0092612 | 1.40 | 0.60 | 4.334   | 0.960   | 3.00  | 4.00   | 4.00   | 5.00   | 6.00   | 2.887 | 4.510   | 0.980   | 3.00  | 4.00   | 4.00   | 5.00   | 6.00    |
| 0.05 | 2.687 | 0.1808245 | 0.0092612 | 0.90 | 0.60 | 15.665  | 6.374   | 9.00  | 11.00  | 14.00  | 19.00  | 24.00  | 2.887 | 16.874  | 6.865   | 9.00  | 12.00  | 16.00  | 20.00  | 26.00   |
| 0.05 | 2.687 | 0.1808245 | 0.0092612 | 0.80 | 0.60 | 7.824   | 2.121   | 5.00  | 6.00   | 8.00   | 9.00   | 11.00  | 2.887 | 8.219   | 2.209   | 6.00  | 7.00   | 8.00   | 9.00   | 11.00   |
| 0.05 | 2.687 | 0.1808245 | 0.0092612 | 0.70 | 0.60 | 4.994   | 1.053   | 4.00  | 4.00   | 5.00   | 6.00   | 6.00   | 2.887 | 5.213   | 1.084   | 4.00  | 4.00   | 5.00   | 6.00   | 7.00    |
| 0.05 | 2.687 | 0.1808245 | 0.0092612 | 0.60 | 0.60 | 3.668   | 0.652   | 3.00  | 3.00   | 4.00   | 4.00   | 4.00   | 2.887 | 3.813   | 0.675   | 3.00  | 3.00   | 4.00   | 4.00   | 5.00    |
| 0.05 | 2.687 | 0.1808245 | 0.0092612 | 0.50 | 0.60 | 2.967   | 0.423   | 2.00  | 3.00   | 3.00   | 3.00   | 3.00   | 2.887 | 3.072   | 0.411   | 3.00  | 3.00   | 3.00   | 3.00   | 4.00    |
| 0.05 | 2.687 | 0.1808245 | 0.0092612 | 1.10 | 0.50 | 13.530  | 5.398   | 8.00  | 10.00  | 13.00  | 16.00  | 21.00  | 2.887 | 14.494  | 5.839   | 8.00  | 10.00  | 13.00  | 18.00  | 22.00   |
| 0.05 | 2.687 | 0.1808245 | 0.0092612 | 1.20 | 0.50 | 8.369   | 2.502   | 6.00  | 7.00   | 8.00   | 10.00  | 12.00  | 2.887 | 8.775   | 2.601   | 6.00  | 7.00   | 8.00   | 10.00  | 12.00   |
| 0.05 | 2.687 | 0.1808245 | 0.0092612 | 1.30 | 0.50 | 5.679   | 1.438   | 4.00  | 5.00   | 6.00   | 7.00   | 8.00   | 2.887 | 5.932   | 1.473   | 4.00  | 5.00   | 6.00   | 7.00   | 8.00    |
| 0.05 | 2.687 | 0.1808245 | 0.0092612 | 1.40 | 0.50 | 4.338   | 0.957   | 3.00  | 4.00   | 4.00   | 5.00   | 6.00   | 2.887 | 4.502   | 0.970   | 3.00  | 4.00   | 4.00   | 5.00   | 6.00    |
| 0.05 | 2.687 | 0.1808245 | 0.0092612 | 0.90 | 0.50 | 13.332  | 5.176   | 8.00  | 10.00  | 12.00  | 16.00  | 20.00  | 2.887 | 14.241  | 5.484   | 8.00  | 10.00  | 13.00  | 17.00  | 22.00   |
| 0.05 | 2.687 | 0.1808245 | 0.0092612 | 0.80 | 0.50 | 7.726   | 2.093   | 5.00  | 6.00   | 7.00   | 9.00   | 10.00  | 2.887 | 8.065   | 2.140   | 6.00  | 7.00   | 8.00   | 9.00   | 11.00   |
| 0.05 | 2.687 | 0.1808245 | 0.0092612 | 0.70 | 0.50 | 4.965   | 1.030   | 4.00  | 4.00   | 5.00   | 6.00   | 6.00   | 2.887 | 5.211   | 1.075   | 4.00  | 4.00   | 5.00   | 6.00   | 7.00    |
| 0.05 | 2.687 | 0.1808245 | 0.0092612 | 0.60 | 0.50 | 3.671   | 0.656   | 3.00  | 3.00   | 4.00   | 4.00   | 4.00   | 2.887 | 3.828   | 0.676   | 3.00  | 3.00   | 4.00   | 4.00   | 5.00    |
| 0.05 | 2.687 | 0.1808245 | 0.0092612 | 0.50 | 0.50 | 2.963   | 0.423   | 2.00  | 3.00   | 3.00   | 3.00   | 3.00   | 2.887 | 3.071   | 0.417   | 3.00  | 3.00   | 3.00   | 3.00   | 4.00    |
| 0.10 | 2.988 | 0.2588680 | 0.0188363 | 1.00 | 1.00 | 370.022 | 359.925 | 45.00 | 111.00 | 256.50 | 507.00 | 845.00 | 3.162 | 501.845 | 494.182 | 65.00 | 154.00 | 350.00 | 700.00 | 1126.00 |
| 0.10 | 2.988 | 0.2588680 | 0.0188363 | 1.10 | 1.10 | 20.357  | 12.578  | 8.00  | 11.00  | 17.00  | 26.00  | 37.00  | 3.162 | 21.500  | 13.250  | 9.00  | 12.00  | 18.00  | 27.00  | 39.00   |
| 0.10 | 2.988 | 0.2588680 | 0.0188363 | 1.20 | 1.10 | 7.458   | 2.885   | 4.00  | 5.00   | 7.00   | 9.00   | 11.00  | 3.162 | 7.865   | 3.025   | 5.00  | 6.00   | 7.00   | 9.25   | 12.00   |
| 0.10 | 2.988 | 0.2588680 | 0.0188363 | 1.30 | 1.10 | 4.707   | 1.414   | 3.00  | 4.00   | 5.00   | 5.00   | 7.00   | 3.162 | 4.910   | 1.462   | 3.00  | 4.00   | 5.00   | 6.00   | 7.00    |
| 0.10 | 2.988 | 0.2588680 | 0.0188363 | 1.40 | 1.10 | 3.545   | 0.912   | 3.00  | 3.00   | 3.00   | 4.00   | 5.00   | 3.162 | 3.650   | 0.928   | 3.00  | 3.00   | 4.00   | 4.00   | 5.00    |
| 0.10 | 2.988 | 0.2588680 | 0.0188363 | 0.90 | 1.10 | 19.074  | 11.200  | 8.00  | 11.00  | 16.00  | 24.00  | 34.00  | 3.162 | 20.404  | 12.014  | 9.00  | 12.00  | 17.00  | 25.00  | 36.00   |
| 0.10 | 2.988 | 0.2588680 | 0.0188363 | 0.80 | 1.10 | 6.750   | 2.309   | 4.00  | 5.00   | 6.00   | 8.00   | 10.00  | 3.162 | 7.064   | 2.432   | 4.00  | 5.00   | 7.00   | 8.00   | 10.00   |
| 0.10 | 2.988 | 0.2588680 | 0.0188363 | 0.70 | 1.10 | 4.114   | 1.035   | 3.00  | 3.00   | 4.00   | 5.00   | 5.00   | 3.162 | 4.255   | 1.060   | 3.00  | 4.00   | 4.00   | 5.00   | 6.00    |
| 0.10 | 2.988 | 0.2588680 | 0.0188363 | 0.60 | 1.10 | 2.997   | 0.629   | 2.00  | 3.00   | 3.00   | 3.00   | 4.00   | 3.162 | 3.095   | 0.633   | 2.00  | 3.00   | 3.00   | 3.00   | 4.00    |
| 0.10 | 2.988 | 0.2588680 | 0.0188363 | 0.50 | 1.10 | 2.315   | 0.474   | 2.00  | 2.00   | 2.00   | 3.00   | 3.00   | 3.162 | 2.397   | 0.504   | 2.00  | 2.00   | 2.00   | 3.00   | 3.00    |
| 0.10 | 2.988 | 0.2588680 | 0.0188363 | 1.10 | 1.20 | 20.067  | 12.120  | 8.00  | 12.00  | 17.00  | 25.00  | 36.00  | 3.162 | 21.787  | 13.540  | 9.00  | 12.00  | 18.00  | 27.00  | 40.00   |
| 0.10 | 2.988 | 0.2588680 | 0.0188363 | 1.20 | 1.20 | 7.538   | 2.952   | 4.00  | 5.00   | 7.00   | 9.00   | 11.00  | 3.162 | 7.926   | 3.071   | 5.00  | 6.00   | 7.00   | 10.00  | 12.00   |
| 0.10 | 2.988 | 0.2588680 | 0.0188363 | 1.30 | 1.20 | 4.726   | 1.395   | 3.00  | 4.00   | 5.00   | 6.00   | 7.00   | 3.162 | 4.925   | 1.492   | 3.00  | 4.00   | 5.00   | 6.00   | 7.00    |
| 0.10 | 2.988 | 0.2588680 | 0.0188363 | 1.40 | 1.20 | 3.539   | 0.912   | 3.00  | 3.00   | 3.00   | 4.00   | 5.00   | 3.162 | 3.652   | 0.934   | 3.00  | 3.00   | 4.00   | 4.00   | 5.00    |
| 0.10 | 2.988 | 0.2588680 | 0.0188363 | 0.90 | 1.20 | 19.035  | 11.049  | 8.00  | 11.00  | 16.00  | 24.00  | 33.00  | 3.162 | 20.531  | 11.972  | 9.00  | 12.00  | 18.00  | 26.00  | 36.00   |
| 0.10 | 2.988 | 0.2588680 | 0.0188363 | 0.80 | 1.20 | 6.721   | 2.281   | 4.00  | 5.00   | 6.00   | 8.00   | 10.00  | 3.162 | 7.061   | 2.424   | 4.00  | 5.00   | 7.00   | 8.00   | 10.00   |
| 0.10 | 2.988 | 0.2588680 | 0.0188363 | 0.70 | 1.20 | 4.108   | 1.038   | 3.00  | 3.00   | 4.00   | 5.00   | 5.00   | 3.162 | 4.265   | 1.076   | 3.00  | 4.00   | 4.00   | 5.00   | 6.00    |
| 0.10 | 2.988 | 0.2588680 | 0.0188363 | 0.60 | 1.20 | 2.991   | 0.632   | 2.00  | 3.00   | 3.00   | 3.00   | 4.00   | 3.162 | 3.080   | 0.624   | 2.00  | 3.00   | 3.00   | 3.00   | 4.00    |
| 0.10 | 2.988 | 0.2588680 | 0.0188363 | 0.50 | 1.20 | 2.320   | 0.477   | 2.00  | 2.00   | 2.00   | 3.00   | 3.00   | 3.162 | 2.401   | 0.508   | 2.00  | 2.00   | 2.00   | 3.00   | 3.00    |
| 0.10 | 2.988 | 0.2588680 | 0.0188363 | 1.10 | 1.30 | 19.889  | 12.113  | 8.00  | 11.00  | 17.00  | 25.00  | 36.00  | 3.162 | 21.569  | 13.458  | 9.00  | 12.00  | 18.00  | 27.00  | 39.00   |
| 0.10 | 2.988 | 0.2588680 | 0.0188363 | 1.20 | 1.30 | 7.538   | 2.969   | 4.00  | 5.00   | 7.00   | 9.00   | 11.00  | 3.162 | 7.915   | 3.019   | 5.00  | 6.00   | 7.00   | 9.00   | 12.00   |
| 0.10 | 2.988 | 0.2588680 | 0.0188363 | 1.30 | 1.30 | 4.722   | 1.431   | 3.00  | 4.00   | 5.00   | 5.00   | 7.00   | 3.162 | 4.892   | 1.452   | 3.00  | 4.00   | 5.00   | 6.00   | 7.00    |
| 0.10 | 2.988 | 0.2588680 | 0.0188363 | 1.40 | 1.30 | 3.543   | 0.919   | 3.00  | 3.00   | 3.00   | 4.00   | 5.00   | 3.162 | 3.654   | 0.923   | 3.00  | 3.00</ |        |        |         |

|      |       |           |           |      |      |         |         |       |        |        |        |        |       |         |         |       |        |        |        |         |
|------|-------|-----------|-----------|------|------|---------|---------|-------|--------|--------|--------|--------|-------|---------|---------|-------|--------|--------|--------|---------|
| 0.10 | 2.988 | 0.2588680 | 0.0188363 | 0.50 | 1.30 | 2.323   | 0.480   | 2.00  | 2.00   | 2.00   | 3.00   | 3.00   | 3.162 | 2.400   | 0.505   | 2.00  | 2.00   | 2.00   | 3.00   | 3.00    |
| 0.10 | 2.988 | 0.2588680 | 0.0188363 | 1.10 | 1.40 | 19.717  | 11.777  | 8.00  | 11.00  | 17.00  | 25.00  | 35.00  | 3.162 | 21.364  | 12.944  | 9.00  | 12.00  | 18.00  | 27.00  | 38.00   |
| 0.10 | 2.988 | 0.2588680 | 0.0188363 | 1.20 | 1.40 | 7.513   | 2.915   | 4.00  | 5.00   | 7.00   | 9.00   | 11.00  | 3.162 | 7.861   | 3.053   | 5.00  | 6.00   | 7.00   | 9.00   | 12.00   |
| 0.10 | 2.988 | 0.2588680 | 0.0188363 | 1.30 | 1.40 | 4.724   | 1.430   | 3.00  | 4.00   | 5.00   | 6.00   | 7.00   | 3.162 | 4.918   | 1.478   | 3.00  | 4.00   | 5.00   | 6.00   | 7.00    |
| 0.10 | 2.988 | 0.2588680 | 0.0188363 | 1.40 | 1.40 | 3.530   | 0.910   | 3.00  | 3.00   | 3.00   | 4.00   | 5.00   | 3.162 | 3.664   | 0.928   | 3.00  | 3.00   | 4.00   | 4.00   | 5.00    |
| 0.10 | 2.988 | 0.2588680 | 0.0188363 | 0.90 | 1.40 | 18.635  | 10.482  | 8.00  | 11.00  | 16.00  | 23.00  | 32.00  | 3.162 | 20.250  | 11.633  | 9.00  | 12.00  | 17.00  | 25.00  | 35.00   |
| 0.10 | 2.988 | 0.2588680 | 0.0188363 | 0.80 | 1.40 | 6.765   | 2.319   | 4.00  | 5.00   | 6.00   | 8.00   | 10.00  | 3.162 | 7.061   | 2.408   | 4.00  | 5.00   | 7.00   | 8.00   | 10.00   |
| 0.10 | 2.988 | 0.2588680 | 0.0188363 | 0.70 | 1.40 | 4.100   | 1.014   | 3.00  | 3.00   | 4.00   | 5.00   | 5.00   | 3.162 | 4.258   | 1.052   | 3.00  | 4.00   | 4.00   | 5.00   | 6.00    |
| 0.10 | 2.988 | 0.2588680 | 0.0188363 | 0.60 | 1.40 | 2.985   | 0.619   | 2.00  | 3.00   | 3.00   | 3.00   | 4.00   | 3.162 | 3.096   | 0.628   | 2.00  | 3.00   | 3.00   | 3.00   | 4.00    |
| 0.10 | 2.988 | 0.2588680 | 0.0188363 | 0.50 | 1.40 | 2.319   | 0.473   | 2.00  | 2.00   | 2.00   | 3.00   | 3.00   | 3.162 | 2.386   | 0.499   | 2.00  | 2.00   | 2.00   | 3.00   | 3.00    |
| 0.10 | 2.988 | 0.2588680 | 0.0188363 | 1.10 | 0.90 | 20.026  | 12.370  | 8.00  | 11.00  | 17.00  | 25.00  | 36.00  | 3.162 | 21.735  | 13.354  | 9.00  | 12.00  | 18.00  | 27.00  | 39.00   |
| 0.10 | 2.988 | 0.2588680 | 0.0188363 | 1.20 | 0.90 | 7.531   | 2.930   | 4.00  | 5.00   | 7.00   | 9.00   | 11.00  | 3.162 | 7.926   | 3.055   | 5.00  | 6.00   | 7.00   | 9.00   | 12.00   |
| 0.10 | 2.988 | 0.2588680 | 0.0188363 | 1.30 | 0.90 | 4.724   | 1.434   | 3.00  | 4.00   | 5.00   | 5.00   | 7.00   | 3.162 | 4.918   | 1.467   | 3.00  | 4.00   | 5.00   | 6.00   | 7.00    |
| 0.10 | 2.988 | 0.2588680 | 0.0188363 | 1.40 | 0.90 | 3.524   | 0.913   | 3.00  | 3.00   | 3.00   | 4.00   | 5.00   | 3.162 | 3.654   | 0.938   | 3.00  | 3.00   | 4.00   | 4.00   | 5.00    |
| 0.10 | 2.988 | 0.2588680 | 0.0188363 | 0.90 | 0.90 | 18.986  | 11.014  | 8.00  | 11.00  | 16.00  | 24.00  | 33.00  | 3.162 | 20.487  | 12.136  | 9.00  | 12.00  | 17.00  | 26.00  | 36.00   |
| 0.10 | 2.988 | 0.2588680 | 0.0188363 | 0.80 | 0.90 | 6.752   | 2.308   | 4.00  | 5.00   | 6.00   | 8.00   | 10.00  | 3.162 | 7.086   | 2.422   | 4.00  | 5.00   | 7.00   | 8.00   | 10.00   |
| 0.10 | 2.988 | 0.2588680 | 0.0188363 | 0.70 | 0.90 | 4.102   | 1.033   | 3.00  | 3.00   | 4.00   | 5.00   | 5.00   | 3.162 | 4.245   | 1.060   | 3.00  | 4.00   | 4.00   | 5.00   | 6.00    |
| 0.10 | 2.988 | 0.2588680 | 0.0188363 | 0.60 | 0.90 | 2.989   | 0.635   | 2.00  | 3.00   | 3.00   | 3.00   | 4.00   | 3.162 | 3.095   | 0.625   | 2.00  | 3.00   | 3.00   | 3.00   | 4.00    |
| 0.10 | 2.988 | 0.2588680 | 0.0188363 | 0.50 | 0.90 | 2.316   | 0.475   | 2.00  | 2.00   | 2.00   | 3.00   | 3.00   | 3.162 | 2.385   | 0.500   | 2.00  | 2.00   | 2.00   | 3.00   | 3.00    |
| 0.10 | 2.988 | 0.2588680 | 0.0188363 | 1.10 | 0.80 | 19.309  | 11.794  | 8.00  | 11.00  | 16.00  | 24.00  | 35.00  | 3.162 | 20.447  | 12.207  | 8.00  | 12.00  | 17.00  | 26.00  | 37.00   |
| 0.10 | 2.988 | 0.2588680 | 0.0188363 | 1.20 | 0.80 | 7.550   | 2.967   | 4.00  | 5.00   | 7.00   | 9.00   | 11.00  | 3.162 | 7.904   | 3.119   | 5.00  | 6.00   | 7.00   | 9.00   | 12.00   |
| 0.10 | 2.988 | 0.2588680 | 0.0188363 | 1.30 | 0.80 | 4.754   | 1.444   | 3.00  | 4.00   | 5.00   | 6.00   | 7.00   | 3.162 | 4.929   | 1.486   | 3.00  | 4.00   | 5.00   | 6.00   | 7.00    |
| 0.10 | 2.988 | 0.2588680 | 0.0188363 | 1.40 | 0.80 | 3.526   | 0.910   | 3.00  | 3.00   | 3.00   | 4.00   | 5.00   | 3.162 | 3.671   | 0.948   | 3.00  | 3.00   | 4.00   | 4.00   | 5.00    |
| 0.10 | 2.988 | 0.2588680 | 0.0188363 | 0.90 | 0.80 | 18.162  | 10.460  | 8.00  | 11.00  | 16.00  | 23.00  | 31.00  | 3.162 | 19.468  | 11.227  | 8.00  | 12.00  | 17.00  | 24.00  | 34.00   |
| 0.10 | 2.988 | 0.2588680 | 0.0188363 | 0.80 | 0.80 | 6.705   | 2.287   | 4.00  | 5.00   | 6.00   | 8.00   | 10.00  | 3.162 | 7.023   | 2.367   | 4.00  | 5.00   | 7.00   | 8.00   | 10.00   |
| 0.10 | 2.988 | 0.2588680 | 0.0188363 | 0.70 | 0.80 | 4.108   | 1.034   | 3.00  | 3.00   | 4.00   | 5.00   | 5.00   | 3.162 | 4.259   | 1.052   | 3.00  | 4.00   | 4.00   | 5.00   | 6.00    |
| 0.10 | 2.988 | 0.2588680 | 0.0188363 | 0.60 | 0.80 | 2.985   | 0.628   | 2.00  | 3.00   | 3.00   | 3.00   | 4.00   | 3.162 | 3.090   | 0.623   | 2.00  | 3.00   | 3.00   | 3.00   | 4.00    |
| 0.10 | 2.988 | 0.2588680 | 0.0188363 | 0.50 | 0.80 | 2.315   | 0.474   | 2.00  | 2.00   | 2.00   | 3.00   | 3.00   | 3.162 | 2.397   | 0.503   | 2.00  | 2.00   | 2.00   | 3.00   | 3.00    |
| 0.10 | 2.988 | 0.2588680 | 0.0188363 | 1.10 | 0.70 | 17.352  | 10.026  | 7.00  | 10.00  | 15.00  | 22.00  | 30.00  | 3.162 | 18.814  | 10.836  | 8.00  | 11.00  | 16.00  | 23.00  | 33.00   |
| 0.10 | 2.988 | 0.2588680 | 0.0188363 | 1.20 | 0.70 | 7.486   | 2.882   | 4.00  | 5.00   | 7.00   | 9.00   | 11.00  | 3.162 | 7.785   | 2.978   | 5.00  | 6.00   | 7.00   | 9.00   | 12.00   |
| 0.10 | 2.988 | 0.2588680 | 0.0188363 | 1.30 | 0.70 | 4.720   | 1.413   | 3.00  | 4.00   | 5.00   | 5.00   | 7.00   | 3.162 | 4.885   | 1.462   | 3.00  | 4.00   | 5.00   | 6.00   | 7.00    |
| 0.10 | 2.988 | 0.2588680 | 0.0188363 | 1.40 | 0.70 | 3.528   | 0.916   | 3.00  | 3.00   | 3.00   | 4.00   | 5.00   | 3.162 | 3.662   | 0.938   | 3.00  | 3.00   | 4.00   | 4.00   | 5.00    |
| 0.10 | 2.988 | 0.2588680 | 0.0188363 | 0.90 | 0.70 | 16.595  | 8.945   | 8.00  | 10.00  | 14.00  | 21.00  | 28.00  | 3.162 | 17.836  | 9.784   | 8.00  | 11.00  | 15.00  | 22.00  | 31.00   |
| 0.10 | 2.988 | 0.2588680 | 0.0188363 | 0.80 | 0.70 | 6.697   | 2.249   | 4.00  | 5.00   | 6.00   | 8.00   | 10.00  | 3.162 | 7.012   | 2.344   | 4.00  | 5.00   | 7.00   | 8.00   | 10.00   |
| 0.10 | 2.988 | 0.2588680 | 0.0188363 | 0.70 | 0.70 | 4.086   | 1.023   | 3.00  | 3.00   | 4.00   | 5.00   | 5.00   | 3.162 | 4.259   | 1.046   | 3.00  | 4.00   | 4.00   | 5.00   | 6.00    |
| 0.10 | 2.988 | 0.2588680 | 0.0188363 | 0.60 | 0.70 | 2.992   | 0.625   | 2.00  | 3.00   | 3.00   | 3.00   | 4.00   | 3.162 | 3.094   | 0.630   | 2.00  | 3.00   | 3.00   | 3.00   | 4.00    |
| 0.10 | 2.988 | 0.2588680 | 0.0188363 | 0.50 | 0.70 | 2.322   | 0.478   | 2.00  | 2.00   | 2.00   | 3.00   | 3.00   | 3.162 | 2.395   | 0.504   | 2.00  | 2.00   | 2.00   | 3.00   | 3.00    |
| 0.10 | 2.988 | 0.2588680 | 0.0188363 | 1.10 | 0.60 | 14.712  | 7.912   | 7.00  | 9.00   | 13.00  | 18.00  | 25.00  | 3.162 | 15.881  | 8.676   | 7.00  | 10.00  | 14.00  | 20.00  | 27.00   |
| 0.10 | 2.988 | 0.2588680 | 0.0188363 | 1.20 | 0.60 | 7.290   | 2.690   | 4.00  | 5.00   | 7.00   | 9.00   | 11.00  | 3.162 | 7.742   | 2.906   | 5.00  | 6.00   | 7.00   | 9.00   | 12.00   |
| 0.10 | 2.988 | 0.2588680 | 0.0188363 | 1.30 | 0.60 | 4.707   | 1.402   | 3.00  | 4.00   | 5.00   | 5.00   | 7.00   | 3.162 | 4.897   | 1.450   | 3.00  | 4.00   | 5.00   | 6.00   | 7.00    |
| 0.10 | 2.988 | 0.2588680 | 0.0188363 | 1.40 | 0.60 | 3.531   | 0.909   | 3.00  | 3.00   | 3.00   | 4.00   | 5.00   | 3.162 | 3.655   | 0.942   | 3.00  | 3.00   | 4.00   | 4.00   | 5.00    |
| 0.10 | 2.988 | 0.2588680 | 0.0188363 | 0.90 | 0.60 | 14.416  | 7.355   | 7.00  | 9.00   | 13.00  | 18.00  | 24.00  | 3.162 | 15.341  | 7.954   | 7.00  | 10.00  | 13.00  | 19.00  | 26.00   |
| 0.10 | 2.988 | 0.2588680 | 0.0188363 | 0.80 | 0.60 | 6.620   | 2.198   | 4.00  | 5.00   | 6.00   | 8.00   | 9.00   | 3.162 | 6.935   | 2.279   | 4.00  | 5.00   | 7.00   | 8.00   | 10.00   |
| 0.10 | 2.988 | 0.2588680 | 0.0188363 | 0.70 | 0.60 | 4.096   | 1.025   | 3.00  | 3.00   | 4.00   | 5.00   | 5.00   | 3.162 | 4.254   | 1.057   | 3.00  | 4.00   | 4.00   | 5.00   | 6.00    |
| 0.10 | 2.988 | 0.2588680 | 0.0188363 | 0.60 | 0.60 | 2.985   | 0.629   | 2.00  | 3.00   | 3.00   | 3.00   | 4.00   | 3.162 | 3.089   | 0.630   | 2.00  | 3.00   | 3.00   | 3.00   | 4.00    |
| 0.10 | 2.988 | 0.2588680 | 0.0188363 | 0.50 | 0.60 | 2.310   | 0.473   | 2.00  | 2.00   | 2.00   | 3.00   | 3.00   | 3.162 | 2.407   | 0.506   | 2.00  | 2.00   | 2.00   | 3.00   | 3.00    |
| 0.10 | 2.988 | 0.2588680 | 0.0188363 | 1.10 | 0.50 | 11.966  | 6.006   | 6.00  | 8.00   | 11.00  | 15.00  | 20.00  | 3.162 | 12.723  | 6.385   | 6.00  | 8.00   | 11.00  | 16.00  | 21.00   |
| 0.10 | 2.988 | 0.2588680 | 0.0188363 | 1.20 | 0.50 | 6.994   | 2.477   | 4.00  | 5.00   | 7.00   | 8.00   | 10.00  | 3.162 | 7.386   | 2.678   | 4.00  | 5.00   | 7.00   | 9.00   | 11.00   |
| 0.10 | 2.988 | 0.2588680 | 0.0188363 | 1.30 | 0.50 | 4.672   | 1.379   | 3.00  | 4.00   | 4.00   | 5.00   | 6.00   | 3.162 | 4.886   | 1.449   | 3.00  | 4.00   | 5.00   | 6.00   | 7.00    |
| 0.10 | 2.988 | 0.2588680 | 0.0188363 | 1.40 | 0.50 | 3.542   | 0.918   | 3.00  | 3.00   | 3.00   | 4.00   | 5.00   | 3.162 | 3.657   | 0.920   | 3.00  | 3.00   | 4.00   | 4.00   | 5.00    |
| 0.10 | 2.988 | 0.2588680 | 0.0188363 | 0.90 | 0.50 | 11.729  | 5.608   | 6.00  | 8.00   | 11.00  | 15.00  | 19.00  | 3.162 | 12.510  | 5.983   | 6.00  | 8.00   | 11.00  | 15.00  | 20.00   |
| 0.10 | 2.988 | 0.2588680 | 0.0188363 | 0.80 | 0.50 | 6.472   | 2.096   | 4.00  | 5.00   | 6.00   | 8.00   | 9.00   | 3.162 | 6.734   | 2.134   | 4.00  | 5.00   | 6.00   | 8.00   | 9.10    |
| 0.10 | 2.988 | 0.2588680 | 0.0188363 | 0.70 | 0.50 | 4.082   | 1.020   | 3.00  | 3.00   | 4.00   | 5.00   | 5.00   | 3.162 | 4.231   | 1.039   | 3.00  | 4.00   | 4.00   | 5.00   | 6.00    |
| 0.10 | 2.988 | 0.2588680 | 0.0188363 | 0.60 | 0.50 | 2.982   | 0.624   | 2.00  | 3.00   | 3.00   | 3.00   | 4.00   | 3.162 | 3.088   | 0.618   | 2.00  | 3.00   | 3.00   | 3.00   | 4.00    |
| 0.10 | 2.988 | 0.2588680 | 0.0188363 | 0.50 | 0.50 | 2.306   | 0.470   | 2.00  | 2.00   | 2.00   | 3.00   | 3.00   | 3.162 | 2.389   | 0.502   | 2.00  | 2.00   | 2.00   | 3.00   | 3.00    |
| 0.15 | 3.105 | 0.3220389 | 0.0289256 | 1.00 | 1.00 | 370.360 | 360.606 | 44.00 | 110.00 | 260.00 | 512.00 | 851.00 | 3.267 | 500.683 | 496.854 | 56.00 | 149.00 | 351.00 | 691.00 | 1143.00 |
| 0.15 | 3.105 | 0.3220389 | 0.0289256 | 1.10 | 1.10 | 21.345  | 15.192  | 7.00  | 11.00  | 17.00  | 27.00  | 41.00  | 3.267 | 23.568  | 17.111  | 8.00  | 12.00  | 19.00  | 30.00  | 46.00   |
| 0.15 | 3.105 | 0.3220389 | 0.0289256 | 1.20 | 1.10 | 7.160   | 3.264   | 4.00  | 5.00   | 6.00   | 9.00   | 11.00  | 3.267 | 7.466   | 3.397   | 4.00  | 5.00   | 7.00   |        |         |

|      |       |           |           |      |      |        |        |      |       |       |       |       |       |        |        |      |       |       |       |       |
|------|-------|-----------|-----------|------|------|--------|--------|------|-------|-------|-------|-------|-------|--------|--------|------|-------|-------|-------|-------|
| 0.15 | 3.105 | 0.3220389 | 0.0289256 | 0.70 | 1.10 | 3.695  | 1.060  | 3.00 | 3.00  | 4.00  | 4.00  | 5.00  | 3.267 | 3.800  | 1.055  | 3.00 | 3.00  | 4.00  | 4.00  | 5.00  |
| 0.15 | 3.105 | 0.3220389 | 0.0289256 | 0.60 | 1.10 | 2.621  | 0.627  | 2.00 | 2.00  | 3.00  | 3.00  | 3.00  | 3.267 | 2.699  | 0.634  | 2.00 | 2.00  | 3.00  | 3.00  | 3.00  |
| 0.15 | 3.105 | 0.3220389 | 0.0289256 | 0.50 | 1.10 | 2.103  | 0.325  | 2.00 | 2.00  | 2.00  | 2.00  | 3.00  | 3.267 | 2.140  | 0.356  | 2.00 | 2.00  | 2.00  | 2.00  | 3.00  |
| 0.15 | 3.105 | 0.3220389 | 0.0289256 | 1.10 | 1.20 | 21.352 | 15.256 | 7.00 | 11.00 | 17.00 | 27.00 | 42.00 | 3.267 | 23.967 | 17.621 | 8.00 | 12.00 | 19.00 | 31.00 | 46.00 |
| 0.15 | 3.105 | 0.3220389 | 0.0289256 | 1.20 | 1.20 | 7.103  | 3.194  | 4.00 | 5.00  | 6.00  | 9.00  | 11.00 | 3.267 | 7.404  | 3.279  | 4.00 | 5.00  | 7.00  | 9.00  | 12.00 |
| 0.15 | 3.105 | 0.3220389 | 0.0289256 | 1.30 | 1.20 | 4.310  | 1.483  | 3.00 | 3.00  | 4.00  | 5.00  | 6.00  | 3.267 | 4.456  | 1.535  | 3.00 | 3.00  | 4.00  | 5.00  | 6.00  |
| 0.15 | 3.105 | 0.3220389 | 0.0289256 | 1.40 | 1.20 | 3.161  | 0.916  | 2.00 | 3.00  | 3.00  | 4.00  | 4.00  | 3.267 | 3.253  | 0.918  | 2.00 | 3.00  | 3.00  | 4.00  | 4.00  |
| 0.15 | 3.105 | 0.3220389 | 0.0289256 | 0.90 | 1.20 | 20.606 | 13.872 | 7.00 | 11.00 | 17.00 | 26.00 | 39.00 | 3.267 | 22.539 | 15.750 | 8.00 | 12.00 | 18.00 | 29.00 | 43.00 |
| 0.15 | 3.105 | 0.3220389 | 0.0289256 | 0.80 | 1.20 | 6.289  | 2.482  | 4.00 | 5.00  | 6.00  | 8.00  | 10.00 | 3.267 | 6.606  | 2.619  | 4.00 | 5.00  | 6.00  | 8.00  | 10.00 |
| 0.15 | 3.105 | 0.3220389 | 0.0289256 | 0.70 | 1.20 | 3.674  | 1.039  | 3.00 | 3.00  | 4.00  | 4.00  | 5.00  | 3.267 | 3.794  | 1.055  | 3.00 | 3.00  | 4.00  | 4.00  | 5.00  |
| 0.15 | 3.105 | 0.3220389 | 0.0289256 | 0.60 | 1.20 | 2.638  | 0.635  | 2.00 | 2.00  | 3.00  | 3.00  | 3.00  | 3.267 | 2.711  | 0.649  | 2.00 | 2.00  | 3.00  | 3.00  | 3.00  |
| 0.15 | 3.105 | 0.3220389 | 0.0289256 | 0.50 | 1.20 | 2.110  | 0.330  | 2.00 | 2.00  | 2.00  | 2.00  | 3.00  | 3.267 | 2.141  | 0.362  | 2.00 | 2.00  | 2.00  | 2.00  | 3.00  |
| 0.15 | 3.105 | 0.3220389 | 0.0289256 | 1.10 | 1.30 | 21.220 | 15.129 | 7.00 | 11.00 | 17.00 | 27.00 | 41.00 | 3.267 | 23.303 | 16.901 | 8.00 | 11.00 | 18.00 | 30.00 | 46.00 |
| 0.15 | 3.105 | 0.3220389 | 0.0289256 | 1.20 | 1.30 | 7.086  | 3.187  | 4.00 | 5.00  | 6.00  | 9.00  | 11.00 | 3.267 | 7.452  | 3.395  | 4.00 | 5.00  | 7.00  | 9.00  | 12.00 |
| 0.15 | 3.105 | 0.3220389 | 0.0289256 | 1.30 | 1.30 | 4.312  | 1.485  | 3.00 | 3.00  | 4.00  | 5.00  | 6.00  | 3.267 | 4.453  | 1.527  | 3.00 | 3.00  | 4.00  | 5.00  | 6.00  |
| 0.15 | 3.105 | 0.3220389 | 0.0289256 | 1.40 | 1.30 | 3.147  | 0.907  | 2.00 | 3.00  | 3.00  | 4.00  | 4.00  | 3.267 | 3.257  | 0.934  | 2.00 | 3.00  | 3.00  | 4.00  | 4.00  |
| 0.15 | 3.105 | 0.3220389 | 0.0289256 | 0.90 | 1.30 | 20.292 | 13.603 | 7.00 | 11.00 | 17.00 | 26.00 | 38.00 | 3.267 | 22.505 | 15.996 | 8.00 | 11.00 | 18.00 | 29.00 | 43.00 |
| 0.15 | 3.105 | 0.3220389 | 0.0289256 | 0.80 | 1.30 | 6.300  | 2.522  | 4.00 | 5.00  | 6.00  | 8.00  | 10.00 | 3.267 | 6.611  | 2.644  | 4.00 | 5.00  | 6.00  | 8.00  | 10.00 |
| 0.15 | 3.105 | 0.3220389 | 0.0289256 | 0.70 | 1.30 | 3.697  | 1.063  | 3.00 | 3.00  | 4.00  | 4.00  | 5.00  | 3.267 | 3.803  | 1.075  | 3.00 | 3.00  | 4.00  | 4.00  | 5.00  |
| 0.15 | 3.105 | 0.3220389 | 0.0289256 | 0.60 | 1.30 | 2.627  | 0.632  | 2.00 | 2.00  | 3.00  | 3.00  | 3.00  | 3.267 | 2.706  | 0.644  | 2.00 | 2.00  | 3.00  | 3.00  | 3.00  |
| 0.15 | 3.105 | 0.3220389 | 0.0289256 | 0.50 | 1.30 | 2.106  | 0.328  | 2.00 | 2.00  | 2.00  | 2.00  | 3.00  | 3.267 | 2.145  | 0.365  | 2.00 | 2.00  | 2.00  | 2.00  | 3.00  |
| 0.15 | 3.105 | 0.3220389 | 0.0289256 | 1.10 | 1.40 | 20.941 | 14.926 | 7.00 | 11.00 | 17.00 | 27.00 | 40.00 | 3.267 | 23.136 | 16.357 | 8.00 | 12.00 | 19.00 | 30.00 | 45.00 |
| 0.15 | 3.105 | 0.3220389 | 0.0289256 | 1.20 | 1.40 | 7.086  | 3.113  | 4.00 | 5.00  | 6.00  | 9.00  | 11.00 | 3.267 | 7.479  | 3.354  | 4.00 | 5.00  | 7.00  | 9.00  | 12.00 |
| 0.15 | 3.105 | 0.3220389 | 0.0289256 | 1.30 | 1.40 | 4.261  | 1.455  | 3.00 | 3.00  | 4.00  | 5.00  | 6.00  | 3.267 | 4.440  | 1.505  | 3.00 | 3.00  | 4.00  | 5.00  | 6.00  |
| 0.15 | 3.105 | 0.3220389 | 0.0289256 | 1.40 | 1.40 | 3.147  | 0.909  | 2.00 | 3.00  | 3.00  | 4.00  | 4.00  | 3.267 | 3.263  | 0.933  | 2.00 | 3.00  | 3.00  | 4.00  | 4.00  |
| 0.15 | 3.105 | 0.3220389 | 0.0289256 | 0.90 | 1.40 | 19.990 | 13.257 | 7.00 | 11.00 | 17.00 | 26.00 | 37.00 | 3.267 | 22.257 | 15.422 | 8.00 | 11.00 | 18.00 | 29.00 | 43.00 |
| 0.15 | 3.105 | 0.3220389 | 0.0289256 | 0.80 | 1.40 | 6.348  | 2.457  | 4.00 | 5.00  | 6.00  | 8.00  | 10.00 | 3.267 | 6.529  | 2.560  | 4.00 | 5.00  | 6.00  | 8.00  | 10.00 |
| 0.15 | 3.105 | 0.3220389 | 0.0289256 | 0.70 | 1.40 | 3.680  | 1.023  | 3.00 | 3.00  | 4.00  | 4.00  | 5.00  | 3.267 | 3.801  | 1.070  | 3.00 | 3.00  | 4.00  | 4.00  | 5.00  |
| 0.15 | 3.105 | 0.3220389 | 0.0289256 | 0.60 | 1.40 | 2.624  | 0.624  | 2.00 | 2.00  | 3.00  | 3.00  | 3.00  | 3.267 | 2.702  | 0.638  | 2.00 | 2.00  | 3.00  | 3.00  | 3.00  |
| 0.15 | 3.105 | 0.3220389 | 0.0289256 | 0.50 | 1.40 | 2.105  | 0.325  | 2.00 | 2.00  | 2.00  | 2.00  | 3.00  | 3.267 | 2.143  | 0.364  | 2.00 | 2.00  | 2.00  | 2.00  | 3.00  |
| 0.15 | 3.105 | 0.3220389 | 0.0289256 | 1.10 | 0.90 | 21.233 | 14.966 | 7.00 | 11.00 | 17.00 | 27.00 | 41.00 | 3.267 | 23.108 | 16.559 | 8.00 | 11.00 | 18.00 | 30.00 | 45.00 |
| 0.15 | 3.105 | 0.3220389 | 0.0289256 | 1.20 | 0.90 | 7.093  | 3.180  | 4.00 | 5.00  | 6.00  | 9.00  | 11.00 | 3.267 | 7.414  | 3.343  | 4.00 | 5.00  | 7.00  | 9.00  | 12.00 |
| 0.15 | 3.105 | 0.3220389 | 0.0289256 | 1.30 | 0.90 | 4.283  | 1.462  | 3.00 | 3.00  | 4.00  | 5.00  | 6.00  | 3.267 | 4.476  | 1.517  | 3.00 | 3.00  | 4.00  | 5.00  | 6.00  |
| 0.15 | 3.105 | 0.3220389 | 0.0289256 | 1.40 | 0.90 | 3.140  | 0.905  | 2.00 | 3.00  | 3.00  | 4.00  | 4.00  | 3.267 | 3.252  | 0.925  | 2.00 | 3.00  | 3.00  | 4.00  | 4.00  |
| 0.15 | 3.105 | 0.3220389 | 0.0289256 | 0.90 | 0.90 | 20.047 | 13.556 | 7.00 | 11.00 | 16.00 | 26.00 | 38.00 | 3.267 | 21.999 | 15.181 | 8.00 | 11.00 | 18.00 | 28.00 | 42.00 |
| 0.15 | 3.105 | 0.3220389 | 0.0289256 | 0.80 | 0.90 | 6.294  | 2.458  | 4.00 | 5.00  | 6.00  | 7.00  | 9.00  | 3.267 | 6.620  | 2.666  | 4.00 | 5.00  | 6.00  | 8.00  | 10.00 |
| 0.15 | 3.105 | 0.3220389 | 0.0289256 | 0.70 | 0.90 | 3.676  | 1.050  | 3.00 | 3.00  | 4.00  | 4.00  | 5.00  | 3.267 | 3.801  | 1.057  | 3.00 | 3.00  | 4.00  | 4.00  | 5.00  |
| 0.15 | 3.105 | 0.3220389 | 0.0289256 | 0.60 | 0.90 | 2.630  | 0.635  | 2.00 | 2.00  | 3.00  | 3.00  | 3.00  | 3.267 | 2.710  | 0.633  | 2.00 | 2.00  | 3.00  | 3.00  | 3.00  |
| 0.15 | 3.105 | 0.3220389 | 0.0289256 | 0.50 | 0.90 | 2.108  | 0.331  | 2.00 | 2.00  | 2.00  | 2.00  | 3.00  | 3.267 | 2.133  | 0.351  | 2.00 | 2.00  | 2.00  | 2.00  | 3.00  |
| 0.15 | 3.105 | 0.3220389 | 0.0289256 | 1.10 | 0.80 | 19.743 | 13.617 | 7.00 | 10.00 | 16.00 | 26.00 | 38.00 | 3.267 | 21.666 | 15.368 | 7.00 | 11.00 | 17.00 | 28.00 | 42.00 |
| 0.15 | 3.105 | 0.3220389 | 0.0289256 | 1.20 | 0.80 | 6.994  | 3.106  | 4.00 | 5.00  | 6.00  | 9.00  | 11.00 | 3.267 | 7.366  | 3.316  | 4.00 | 5.00  | 7.00  | 9.00  | 12.00 |
| 0.15 | 3.105 | 0.3220389 | 0.0289256 | 1.30 | 0.80 | 4.247  | 1.457  | 3.00 | 3.00  | 4.00  | 5.00  | 6.00  | 3.267 | 4.442  | 1.511  | 3.00 | 3.00  | 4.00  | 5.00  | 6.00  |
| 0.15 | 3.105 | 0.3220389 | 0.0289256 | 1.40 | 0.80 | 3.149  | 0.916  | 2.00 | 3.00  | 3.00  | 4.00  | 4.00  | 3.267 | 3.250  | 0.923  | 2.00 | 3.00  | 3.00  | 4.00  | 4.00  |
| 0.15 | 3.105 | 0.3220389 | 0.0289256 | 0.90 | 0.80 | 19.128 | 12.721 | 7.00 | 10.00 | 16.00 | 24.00 | 36.00 | 3.267 | 20.991 | 14.240 | 8.00 | 11.00 | 17.00 | 27.00 | 39.00 |
| 0.15 | 3.105 | 0.3220389 | 0.0289256 | 0.80 | 0.80 | 6.310  | 2.467  | 4.00 | 5.00  | 6.00  | 8.00  | 9.00  | 3.267 | 6.523  | 2.575  | 4.00 | 5.00  | 6.00  | 8.00  | 10.00 |
| 0.15 | 3.105 | 0.3220389 | 0.0289256 | 0.70 | 0.80 | 3.679  | 1.043  | 3.00 | 3.00  | 4.00  | 4.00  | 5.00  | 3.267 | 3.803  | 1.058  | 3.00 | 3.00  | 4.00  | 4.00  | 5.00  |
| 0.15 | 3.105 | 0.3220389 | 0.0289256 | 0.60 | 0.80 | 2.629  | 0.628  | 2.00 | 2.00  | 3.00  | 3.00  | 3.00  | 3.267 | 2.722  | 0.649  | 2.00 | 2.00  | 3.00  | 3.00  | 3.00  |
| 0.15 | 3.105 | 0.3220389 | 0.0289256 | 0.50 | 0.80 | 2.110  | 0.331  | 2.00 | 2.00  | 2.00  | 2.00  | 3.00  | 3.267 | 2.141  | 0.358  | 2.00 | 2.00  | 2.00  | 2.00  | 3.00  |
| 0.15 | 3.105 | 0.3220389 | 0.0289256 | 1.10 | 0.70 | 17.743 | 11.640 | 7.00 | 10.00 | 15.00 | 23.00 | 33.00 | 3.267 | 19.519 | 13.206 | 7.00 | 10.00 | 16.00 | 25.00 | 36.00 |
| 0.15 | 3.105 | 0.3220389 | 0.0289256 | 1.20 | 0.70 | 6.997  | 3.087  | 4.00 | 5.00  | 6.00  | 8.00  | 11.00 | 3.267 | 7.298  | 3.269  | 4.00 | 5.00  | 7.00  | 9.00  | 11.00 |
| 0.15 | 3.105 | 0.3220389 | 0.0289256 | 1.30 | 0.70 | 4.262  | 1.464  | 3.00 | 3.00  | 4.00  | 5.00  | 6.00  | 3.267 | 4.452  | 1.495  | 3.00 | 3.00  | 4.00  | 5.00  | 6.00  |
| 0.15 | 3.105 | 0.3220389 | 0.0289256 | 1.40 | 0.70 | 3.158  | 0.910  | 2.00 | 3.00  | 3.00  | 4.00  | 4.00  | 3.267 | 3.255  | 0.937  | 2.00 | 3.00  | 3.00  | 4.00  | 4.00  |
| 0.15 | 3.105 | 0.3220389 | 0.0289256 | 0.90 | 0.70 | 17.088 | 10.894 | 7.00 | 9.00  | 14.00 | 22.00 | 31.00 | 3.267 | 18.713 | 12.244 | 7.00 | 10.00 | 15.00 | 24.00 | 35.00 |
| 0.15 | 3.105 | 0.3220389 | 0.0289256 | 0.80 | 0.70 | 6.196  | 2.403  | 4.00 | 4.00  | 6.00  | 7.00  | 9.00  | 3.267 | 6.534  | 2.563  | 4.00 | 5.00  | 6.00  | 8.00  | 10.00 |
| 0.15 | 3.105 | 0.3220389 | 0.0289256 | 0.70 | 0.70 | 3.671  | 1.043  | 3.00 | 3.00  | 4.00  | 4.00  | 5.00  | 3.267 | 3.816  | 1.059  | 3.00 | 3.00  | 4.00  | 4.00  | 5.00  |
| 0.15 | 3.105 | 0.3220389 | 0.0289256 | 0.60 | 0.70 | 2.625  | 0.630  | 2.00 | 2.00  | 3.00  | 3.00  | 3.00  | 3.267 | 2.699  | 0.639  | 2.00 | 2.00  | 3.00  | 3.00  | 3.00  |
| 0.15 | 3.105 | 0.3220389 | 0.0289256 | 0.50 | 0.70 | 2.114  | 0.337  | 2.00 | 2.00  | 2.00  | 2.00  | 3.00  | 3.267 | 2.144  | 0.359  | 2.00 | 2.00  | 2.00  | 2.00  | 3.00  |
| 0.15 | 3.105 | 0.3220389 | 0.0289256 | 1.10 | 0.60 | 14.535 | 9.126  | 6.00 | 8.00  | 12.00 | 18.00 | 26.00 | 3.267 | 15.728 | 9.965  | 6.00 | 9.00  | 13.00 | 20.00 | 28.0  |

|                              |       |           |           |      |      |         |         |       |        |        |        |                              |       |         |         |       |        |        |        |         |  |
|------------------------------|-------|-----------|-----------|------|------|---------|---------|-------|--------|--------|--------|------------------------------|-------|---------|---------|-------|--------|--------|--------|---------|--|
| 0.15                         | 3.105 | 0.3220389 | 0.0289256 | 0.80 | 0.60 | 6.126   | 2.328   | 4.00  | 4.00   | 6.00   | 7.00   | 9.00                         | 3.267 | 6.394   | 2.405   | 4.00  | 5.00   | 6.00   | 8.00   | 10.00   |  |
| 0.15                         | 3.105 | 0.3220389 | 0.0289256 | 0.70 | 0.60 | 3.676   | 1.042   | 3.00  | 3.00   | 4.00   | 4.00   | 5.00                         | 3.267 | 3.806   | 1.067   | 3.00  | 3.00   | 4.00   | 4.00   | 5.00    |  |
| 0.15                         | 3.105 | 0.3220389 | 0.0289256 | 0.60 | 0.60 | 2.624   | 0.625   | 2.00  | 2.00   | 3.00   | 3.00   | 3.00                         | 3.267 | 2.719   | 0.649   | 2.00  | 2.00   | 3.00   | 3.00   | 3.00    |  |
| 0.15                         | 3.105 | 0.3220389 | 0.0289256 | 0.50 | 0.60 | 2.106   | 0.329   | 2.00  | 2.00   | 2.00   | 2.00   | 3.00                         | 3.267 | 2.150   | 0.364   | 2.00  | 2.00   | 2.00   | 2.00   | 3.00    |  |
| 0.15                         | 3.105 | 0.3220389 | 0.0289256 | 1.10 | 0.50 | 11.394  | 6.578   | 5.00  | 7.00   | 10.00  | 14.00  | 20.00                        | 3.267 | 12.267  | 7.195   | 5.00  | 7.00   | 10.00  | 15.00  | 21.00   |  |
| 0.15                         | 3.105 | 0.3220389 | 0.0289256 | 1.20 | 0.50 | 6.470   | 2.639   | 4.00  | 5.00   | 6.00   | 8.00   | 10.00                        | 3.267 | 6.820   | 2.828   | 4.00  | 5.00   | 6.00   | 8.00   | 11.00   |  |
| 0.15                         | 3.105 | 0.3220389 | 0.0289256 | 1.30 | 0.50 | 4.202   | 1.389   | 3.00  | 3.00   | 4.00   | 5.00   | 6.00                         | 3.267 | 4.372   | 1.432   | 3.00  | 3.00   | 4.00   | 5.00   | 6.00    |  |
| 0.15                         | 3.105 | 0.3220389 | 0.0289256 | 1.40 | 0.50 | 3.137   | 0.893   | 2.00  | 3.00   | 3.00   | 4.00   | 4.00                         | 3.267 | 3.240   | 0.927   | 2.00  | 3.00   | 3.00   | 4.00   | 4.00    |  |
| 0.15                         | 3.105 | 0.3220389 | 0.0289256 | 0.90 | 0.50 | 11.419  | 6.384   | 5.00  | 7.00   | 10.00  | 14.00  | 20.00                        | 3.267 | 12.063  | 6.774   | 5.00  | 7.00   | 10.00  | 15.00  | 21.00   |  |
| 0.15                         | 3.105 | 0.3220389 | 0.0289256 | 0.80 | 0.50 | 5.916   | 2.185   | 4.00  | 4.00   | 6.00   | 7.00   | 9.00                         | 3.267 | 6.162   | 2.284   | 4.00  | 5.00   | 6.00   | 7.00   | 9.00    |  |
| 0.15                         | 3.105 | 0.3220389 | 0.0289256 | 0.70 | 0.50 | 3.659   | 1.018   | 3.00  | 3.00   | 3.00   | 4.00   | 5.00                         | 3.267 | 3.802   | 1.042   | 3.00  | 3.00   | 4.00   | 4.00   | 5.00    |  |
| 0.15                         | 3.105 | 0.3220389 | 0.0289256 | 0.60 | 0.50 | 2.617   | 0.616   | 2.00  | 2.00   | 3.00   | 3.00   | 3.00                         | 3.267 | 2.720   | 0.649   | 2.00  | 2.00   | 3.00   | 3.00   | 3.00    |  |
| 0.15                         | 3.105 | 0.3220389 | 0.0289256 | 0.50 | 0.50 | 2.105   | 0.325   | 2.00  | 2.00   | 2.00   | 2.00   | 3.00                         | 3.267 | 2.143   | 0.361   | 2.00  | 2.00   | 2.00   | 2.00   | 3.00    |  |
| <b>ARL<sub>0</sub> = 370</b> |       |           |           |      |      |         |         |       |        |        |        | <b>ARL<sub>0</sub> = 500</b> |       |         |         |       |        |        |        |         |  |
| <b>Case 2</b>                |       |           |           |      |      |         |         |       |        |        |        |                              |       |         |         |       |        |        |        |         |  |
| <b><math>\phi=148</math></b> |       |           |           |      |      |         |         |       |        |        |        |                              |       |         |         |       |        |        |        |         |  |
| 0.05                         | 2.693 | 0.1815312 | 0.0092496 | 1.00 | 1.00 | 371.630 | 356.051 | 53.00 | 119.00 | 262.00 | 511.00 | 851.00                       | 2.888 | 500.861 | 488.895 | 67.00 | 161.00 | 354.50 | 683.00 | 1124.00 |  |
| 0.05                         | 2.693 | 0.1815312 | 0.0092496 | 1.10 | 1.10 | 32.770  | 19.578  | 13.00 | 19.00  | 28.00  | 41.00  | 58.00                        | 2.888 | 35.793  | 21.511  | 15.00 | 21.00  | 31.00  | 45.00  | 64.00   |  |
| 0.05                         | 2.693 | 0.1815312 | 0.0092496 | 1.20 | 1.10 | 13.099  | 5.170   | 7.00  | 9.00   | 12.00  | 16.00  | 20.00                        | 2.888 | 13.871  | 5.402   | 8.00  | 10.00  | 13.00  | 17.00  | 21.00   |  |
| 0.05                         | 2.693 | 0.1815312 | 0.0092496 | 1.30 | 1.10 | 8.267   | 2.575   | 5.00  | 6.00   | 8.00   | 10.00  | 12.00                        | 2.888 | 8.674   | 2.634   | 6.00  | 7.00   | 8.00   | 10.00  | 12.00   |  |
| 0.05                         | 2.693 | 0.1815312 | 0.0092496 | 1.40 | 1.10 | 6.146   | 1.659   | 4.00  | 5.00   | 6.00   | 7.00   | 8.00                         | 2.888 | 6.440   | 1.687   | 5.00  | 5.00   | 6.00   | 7.00   | 9.00    |  |
| 0.05                         | 2.693 | 0.1815312 | 0.0092496 | 0.90 | 1.10 | 31.338  | 17.466  | 14.00 | 19.00  | 27.00  | 39.00  | 54.00                        | 2.888 | 34.109  | 19.174  | 15.00 | 21.00  | 29.00  | 43.00  | 59.00   |  |
| 0.05                         | 2.693 | 0.1815312 | 0.0092496 | 0.80 | 1.10 | 11.787  | 4.132   | 7.00  | 9.00   | 11.00  | 14.00  | 17.00                        | 2.888 | 12.435  | 4.294   | 8.00  | 9.00   | 12.00  | 15.00  | 18.00   |  |
| 0.05                         | 2.693 | 0.1815312 | 0.0092496 | 0.70 | 1.10 | 7.142   | 1.817   | 5.00  | 6.00   | 7.00   | 8.00   | 10.00                        | 2.888 | 7.503   | 1.908   | 5.00  | 6.00   | 7.00   | 9.00   | 10.00   |  |
| 0.05                         | 2.693 | 0.1815312 | 0.0092496 | 0.60 | 1.10 | 5.135   | 1.079   | 4.00  | 4.00   | 5.00   | 6.00   | 7.00                         | 2.888 | 5.339   | 1.080   | 4.00  | 5.00   | 5.00   | 6.00   | 7.00    |  |
| 0.05                         | 2.693 | 0.1815312 | 0.0092496 | 0.50 | 1.10 | 4.012   | 0.712   | 3.00  | 4.00   | 4.00   | 4.00   | 5.00                         | 2.888 | 4.175   | 0.713   | 3.00  | 4.00   | 4.00   | 5.00   | 5.00    |  |
| 0.05                         | 2.693 | 0.1815312 | 0.0092496 | 1.10 | 1.20 | 32.426  | 19.086  | 13.00 | 19.00  | 28.00  | 41.00  | 58.00                        | 2.888 | 35.246  | 20.760  | 15.00 | 21.00  | 30.00  | 44.00  | 62.00   |  |
| 0.05                         | 2.693 | 0.1815312 | 0.0092496 | 1.20 | 1.20 | 13.038  | 5.120   | 7.00  | 9.00   | 12.00  | 16.00  | 20.00                        | 2.888 | 13.821  | 5.382   | 8.00  | 10.00  | 13.00  | 17.00  | 21.00   |  |
| 0.05                         | 2.693 | 0.1815312 | 0.0092496 | 1.30 | 1.20 | 8.260   | 2.577   | 5.00  | 6.00   | 8.00   | 10.00  | 12.00                        | 2.888 | 8.695   | 2.658   | 6.00  | 7.00   | 8.00   | 10.00  | 12.00   |  |
| 0.05                         | 2.693 | 0.1815312 | 0.0092496 | 1.40 | 1.20 | 6.155   | 1.649   | 4.00  | 5.00   | 6.00   | 7.00   | 8.00                         | 2.888 | 6.404   | 1.684   | 4.00  | 5.00   | 6.00   | 7.00   | 9.00    |  |
| 0.05                         | 2.693 | 0.1815312 | 0.0092496 | 0.90 | 1.20 | 30.961  | 17.113  | 14.00 | 19.00  | 27.00  | 38.25  | 53.00                        | 2.888 | 33.653  | 18.717  | 15.00 | 20.00  | 29.00  | 42.00  | 58.00   |  |
| 0.05                         | 2.693 | 0.1815312 | 0.0092496 | 0.80 | 1.20 | 11.807  | 4.076   | 7.00  | 9.00   | 11.00  | 14.00  | 17.00                        | 2.888 | 12.455  | 4.260   | 8.00  | 9.00   | 12.00  | 15.00  | 18.00   |  |
| 0.05                         | 2.693 | 0.1815312 | 0.0092496 | 0.70 | 1.20 | 7.165   | 1.864   | 5.00  | 6.00   | 7.00   | 8.00   | 10.00                        | 2.888 | 7.516   | 1.891   | 5.00  | 6.00   | 7.00   | 9.00   | 10.00   |  |
| 0.05                         | 2.693 | 0.1815312 | 0.0092496 | 0.60 | 1.20 | 5.138   | 1.074   | 4.00  | 4.00   | 5.00   | 6.00   | 7.00                         | 2.888 | 5.353   | 1.087   | 4.00  | 5.00   | 5.00   | 6.00   | 7.00    |  |
| 0.05                         | 2.693 | 0.1815312 | 0.0092496 | 0.50 | 1.20 | 4.007   | 0.712   | 3.00  | 4.00   | 4.00   | 4.00   | 5.00                         | 2.888 | 4.176   | 0.716   | 3.00  | 4.00   | 4.00   | 5.00   | 5.00    |  |
| 0.05                         | 2.693 | 0.1815312 | 0.0092496 | 1.10 | 1.30 | 30.969  | 17.067  | 14.00 | 19.00  | 27.00  | 39.00  | 53.00                        | 2.888 | 33.952  | 19.137  | 15.00 | 20.00  | 30.00  | 43.00  | 59.00   |  |
| 0.05                         | 2.693 | 0.1815312 | 0.0092496 | 1.20 | 1.30 | 13.089  | 5.104   | 7.00  | 9.00   | 12.00  | 16.00  | 20.00                        | 2.888 | 13.793  | 5.330   | 8.00  | 10.00  | 13.00  | 17.00  | 21.00   |  |
| 0.05                         | 2.693 | 0.1815312 | 0.0092496 | 1.30 | 1.30 | 8.288   | 2.608   | 5.00  | 6.00   | 8.00   | 10.00  | 12.00                        | 2.888 | 8.660   | 2.642   | 6.00  | 7.00   | 8.00   | 10.00  | 12.00   |  |
| 0.05                         | 2.693 | 0.1815312 | 0.0092496 | 1.40 | 1.30 | 6.141   | 1.659   | 4.00  | 5.00   | 6.00   | 7.00   | 8.00                         | 2.888 | 6.409   | 1.688   | 4.00  | 5.00   | 6.00   | 7.00   | 9.00    |  |
| 0.05                         | 2.693 | 0.1815312 | 0.0092496 | 0.90 | 1.30 | 29.844  | 15.696  | 14.00 | 19.00  | 26.00  | 37.00  | 51.00                        | 2.888 | 32.634  | 17.777  | 15.00 | 20.00  | 29.00  | 41.00  | 56.00   |  |
| 0.05                         | 2.693 | 0.1815312 | 0.0092496 | 0.80 | 1.30 | 11.748  | 4.062   | 7.00  | 9.00   | 11.00  | 14.00  | 17.00                        | 2.888 | 12.416  | 4.232   | 8.00  | 9.00   | 12.00  | 15.00  | 18.00   |  |
| 0.05                         | 2.693 | 0.1815312 | 0.0092496 | 0.70 | 1.30 | 7.156   | 1.846   | 5.00  | 6.00   | 7.00   | 8.00   | 10.00                        | 2.888 | 7.480   | 1.904   | 5.00  | 6.00   | 7.00   | 9.00   | 10.00   |  |
| 0.05                         | 2.693 | 0.1815312 | 0.0092496 | 0.60 | 1.30 | 5.125   | 1.057   | 4.00  | 4.00   | 5.00   | 6.00   | 6.00                         | 2.888 | 5.341   | 1.093   | 4.00  | 5.00   | 5.00   | 6.00   | 7.00    |  |
| 0.05                         | 2.693 | 0.1815312 | 0.0092496 | 0.50 | 1.30 | 4.007   | 0.713   | 3.00  | 4.00   | 4.00   | 4.00   | 5.00                         | 2.888 | 4.179   | 0.722   | 3.00  | 4.00   | 4.00   | 5.00   | 5.00    |  |
| 0.05                         | 2.693 | 0.1815312 | 0.0092496 | 1.10 | 1.40 | 29.593  | 15.560  | 13.00 | 19.00  | 26.00  | 37.00  | 50.00                        | 2.888 | 32.454  | 17.641  | 15.00 | 20.00  | 28.00  | 41.00  | 55.00   |  |
| 0.05                         | 2.693 | 0.1815312 | 0.0092496 | 1.20 | 1.40 | 13.112  | 5.151   | 7.00  | 9.00   | 12.00  | 16.00  | 20.00                        | 2.888 | 13.685  | 5.180   | 8.00  | 10.00  | 13.00  | 17.00  | 21.00   |  |
| 0.05                         | 2.693 | 0.1815312 | 0.0092496 | 1.30 | 1.40 | 8.291   | 2.611   | 5.00  | 6.00   | 8.00   | 10.00  | 12.00                        | 2.888 | 8.636   | 2.677   | 6.00  | 7.00   | 8.00   | 10.00  | 12.00   |  |
| 0.05                         | 2.693 | 0.1815312 | 0.0092496 | 1.40 | 1.40 | 6.152   | 1.641   | 4.00  | 5.00   | 6.00   | 7.00   | 8.00                         | 2.888 | 6.434   | 1.692   | 5.00  | 5.00   | 6.00   | 7.00   | 9.00    |  |
| 0.05                         | 2.693 | 0.1815312 | 0.0092496 | 0.90 | 1.40 | 28.419  | 14.289  | 14.00 | 18.00  | 25.00  | 35.00  | 47.00                        | 2.888 | 31.124  | 15.821  | 15.00 | 20.00  | 28.00  | 38.00  | 52.00   |  |
| 0.05                         | 2.693 | 0.1815312 | 0.0092496 | 0.80 | 1.40 | 11.821  | 4.079   | 7.00  | 9.00   | 11.00  | 14.00  | 17.00                        | 2.888 | 12.426  | 4.212   | 8.00  | 9.00   | 12.00  | 15.00  | 18.00   |  |
| 0.05                         | 2.693 | 0.1815312 | 0.0092496 | 0.70 | 1.40 | 7.159   | 1.848   | 5.00  | 6.00   | 7.00   | 8.00   | 10.00                        | 2.888 | 7.487   | 1.883   | 5.00  | 6.00   | 7.00   | 9.00   | 10.00   |  |
| 0.05                         | 2.693 | 0.1815312 | 0.0092496 | 0.60 | 1.40 | 5.127   | 1.049   | 4.00  | 4.00   | 5.00   | 6.00   | 6.00                         | 2.888 | 5.362   | 1.102   | 4.00  | 5.00   | 5.00   | 6.00   | 7.00    |  |
| 0.05                         | 2.693 | 0.1815312 | 0.0092496 | 0.50 | 1.40 | 4.017   | 0.712   | 3.00  | 4.00   | 4.00   | 4.00   | 5.00                         | 2.888 | 4.183   | 0.721   | 3.00  | 4.00   | 4.00   | 5.00   | 5.00    |  |
| 0.05                         | 2.693 | 0.1815312 | 0.0092496 | 1.10 | 0.90 | 32.160  | 18.605  | 13.00 | 19.00  | 28.00  | 40.00  | 57.00                        | 2.888 | 35.227  | 21.168  | 15.00 | 20.00  | 30.00  | 44.00  | 63.00   |  |
| 0.05                         | 2.693 | 0.1815312 | 0.0092496 | 1.20 | 0.90 | 13.059  | 5.124   | 7.00  | 9.00   | 12.00  | 16.00  | 20.00                        | 2.888 | 13.859  | 5.409   | 8.00  | 10.00  | 13.00  | 17.00  | 21.00   |  |
| 0.05                         | 2.693 | 0.1815312 | 0.0092496 | 1.30 | 0.90 | 8.296   | 2.632   | 5.00  | 6.00   | 8.00   | 10.00  | 12.00                        | 2.888 | 8.626   | 2.641   | 6.00  | 7.00   | 8.00   | 10.00  | 12.00   |  |
| 0.05                         | 2.693 | 0.1815312 | 0.0092496 | 1.40 | 0.90 | 6.132   | 1.630   | 4.00  | 5.00   | 6.00   | 7.00   | 8.00                         | 2.888 | 6.394   | 1.694   | 4.00  | 5.00   | 6.00   | 7.00   | 9.00    |  |
| 0.05                         | 2.693 | 0.1815312 | 0.0092496 | 0.90 | 0.90 | 30.462  | 16.868  | 13.00 | 18.00  | 27.00  | 38.00  | 52.00                        | 2.888 | 33.146  | 18.206  | 15.00 | 20.00  | 29.00  | 41.00  | 57.00   |  |
| 0.05                         | 2.693 | 0.1815312 | 0.0092496 | 0.80 | 0.90 | 11.780  | 4.094   | 7.00  | 9.00   |        |        |                              |       |         |         |       |        |        |        |         |  |

|      |       |           |           |      |      |         |         |       |        |        |        |        |       |         |         |       |        |        |        |         |
|------|-------|-----------|-----------|------|------|---------|---------|-------|--------|--------|--------|--------|-------|---------|---------|-------|--------|--------|--------|---------|
| 0.05 | 2.693 | 0.1815312 | 0.0092496 | 1.10 | 0.80 | 29.510  | 16.739  | 13.00 | 18.00  | 26.00  | 37.00  | 51.00  | 2.888 | 32.363  | 18.510  | 14.00 | 19.00  | 28.00  | 41.00  | 57.00   |
| 0.05 | 2.693 | 0.1815312 | 0.0092496 | 1.20 | 0.80 | 12.974  | 4.986   | 7.00  | 9.00   | 12.00  | 16.00  | 20.00  | 2.888 | 13.792  | 5.346   | 8.00  | 10.00  | 13.00  | 17.00  | 21.00   |
| 0.05 | 2.693 | 0.1815312 | 0.0092496 | 1.30 | 0.80 | 8.268   | 2.544   | 5.00  | 6.00   | 8.00   | 10.00  | 12.00  | 2.888 | 8.630   | 2.636   | 6.00  | 7.00   | 8.00   | 10.00  | 12.00   |
| 0.05 | 2.693 | 0.1815312 | 0.0092496 | 1.40 | 0.80 | 6.164   | 1.644   | 4.00  | 5.00   | 6.00   | 7.00   | 8.00   | 2.888 | 6.386   | 1.694   | 4.00  | 5.00   | 6.00   | 7.00   | 9.00    |
| 0.05 | 2.693 | 0.1815312 | 0.0092496 | 0.90 | 0.80 | 28.223  | 14.935  | 13.00 | 18.00  | 25.00  | 35.00  | 48.00  | 2.888 | 30.732  | 16.401  | 14.00 | 19.00  | 27.00  | 38.00  | 52.00   |
| 0.05 | 2.693 | 0.1815312 | 0.0092496 | 0.80 | 0.80 | 11.708  | 4.014   | 7.00  | 9.00   | 11.00  | 14.00  | 17.00  | 2.888 | 12.414  | 4.222   | 8.00  | 9.00   | 12.00  | 15.00  | 18.00   |
| 0.05 | 2.693 | 0.1815312 | 0.0092496 | 0.70 | 0.80 | 7.156   | 1.843   | 5.00  | 6.00   | 7.00   | 8.00   | 10.00  | 2.888 | 7.522   | 1.916   | 5.00  | 6.00   | 7.00   | 9.00   | 10.00   |
| 0.05 | 2.693 | 0.1815312 | 0.0092496 | 0.60 | 0.80 | 5.138   | 1.068   | 4.00  | 4.00   | 5.00   | 6.00   | 6.00   | 2.888 | 5.363   | 1.104   | 4.00  | 5.00   | 5.00   | 6.00   | 7.00    |
| 0.05 | 2.693 | 0.1815312 | 0.0092496 | 0.50 | 0.80 | 4.003   | 0.715   | 3.00  | 4.00   | 4.00   | 4.00   | 5.00   | 2.888 | 4.177   | 0.725   | 3.00  | 4.00   | 4.00   | 5.00   | 5.00    |
| 0.05 | 2.693 | 0.1815312 | 0.0092496 | 1.10 | 0.70 | 24.960  | 13.274  | 11.00 | 15.00  | 22.00  | 31.00  | 43.00  | 2.888 | 27.192  | 14.401  | 12.00 | 17.00  | 24.00  | 34.00  | 46.00   |
| 0.05 | 2.693 | 0.1815312 | 0.0092496 | 1.20 | 0.70 | 12.733  | 4.815   | 7.00  | 9.00   | 12.00  | 15.00  | 19.00  | 2.888 | 13.372  | 5.088   | 8.00  | 10.00  | 13.00  | 16.00  | 20.00   |
| 0.05 | 2.693 | 0.1815312 | 0.0092496 | 1.30 | 0.70 | 8.222   | 2.520   | 5.00  | 6.00   | 8.00   | 10.00  | 12.00  | 2.888 | 8.645   | 2.636   | 6.00  | 7.00   | 8.00   | 10.00  | 12.00   |
| 0.05 | 2.693 | 0.1815312 | 0.0092496 | 1.40 | 0.70 | 6.133   | 1.647   | 4.00  | 5.00   | 6.00   | 7.00   | 8.00   | 2.888 | 6.385   | 1.683   | 4.00  | 5.00   | 6.00   | 7.00   | 9.00    |
| 0.05 | 2.693 | 0.1815312 | 0.0092496 | 0.90 | 0.70 | 24.467  | 12.303  | 12.00 | 16.00  | 22.00  | 31.00  | 41.00  | 2.888 | 26.710  | 13.572  | 13.00 | 17.00  | 24.00  | 33.00  | 45.00   |
| 0.05 | 2.693 | 0.1815312 | 0.0092496 | 0.80 | 0.70 | 11.576  | 3.934   | 7.00  | 9.00   | 11.00  | 14.00  | 17.00  | 2.888 | 12.298  | 4.063   | 8.00  | 9.00   | 12.00  | 15.00  | 18.00   |
| 0.05 | 2.693 | 0.1815312 | 0.0092496 | 0.70 | 0.70 | 7.123   | 1.815   | 5.00  | 6.00   | 7.00   | 8.00   | 10.00  | 2.888 | 7.499   | 1.905   | 5.00  | 6.00   | 7.00   | 9.00   | 10.00   |
| 0.05 | 2.693 | 0.1815312 | 0.0092496 | 0.60 | 0.70 | 5.111   | 1.058   | 4.00  | 4.00   | 5.00   | 6.00   | 6.00   | 2.888 | 5.347   | 1.099   | 4.00  | 5.00   | 5.00   | 6.00   | 7.00    |
| 0.05 | 2.693 | 0.1815312 | 0.0092496 | 0.50 | 0.70 | 4.004   | 0.700   | 3.00  | 4.00   | 4.00   | 4.00   | 5.00   | 2.888 | 4.168   | 0.715   | 3.00  | 4.00   | 4.00   | 5.00   | 5.00    |
| 0.05 | 2.693 | 0.1815312 | 0.0092496 | 1.10 | 0.60 | 20.043  | 9.654   | 10.00 | 13.00  | 18.00  | 25.00  | 33.00  | 2.888 | 21.464  | 10.527  | 10.00 | 14.00  | 19.00  | 27.00  | 35.00   |
| 0.05 | 2.693 | 0.1815312 | 0.0092496 | 1.20 | 0.60 | 12.135  | 4.449   | 7.00  | 9.00   | 11.00  | 14.00  | 18.00  | 2.888 | 12.855  | 4.672   | 8.00  | 10.00  | 12.00  | 15.00  | 19.00   |
| 0.05 | 2.693 | 0.1815312 | 0.0092496 | 1.30 | 0.60 | 8.176   | 2.492   | 5.00  | 6.00   | 8.00   | 10.00  | 11.00  | 2.888 | 8.549   | 2.517   | 6.00  | 7.00   | 8.00   | 10.00  | 12.00   |
| 0.05 | 2.693 | 0.1815312 | 0.0092496 | 1.40 | 0.60 | 6.128   | 1.622   | 4.00  | 5.00   | 6.00   | 7.00   | 8.00   | 2.888 | 6.368   | 1.662   | 4.00  | 5.00   | 6.00   | 7.00   | 9.00    |
| 0.05 | 2.693 | 0.1815312 | 0.0092496 | 0.90 | 0.60 | 19.861  | 9.359   | 10.00 | 13.00  | 18.00  | 24.00  | 32.00  | 2.888 | 21.086  | 9.845   | 11.00 | 14.00  | 19.00  | 26.00  | 34.00   |
| 0.05 | 2.693 | 0.1815312 | 0.0092496 | 0.80 | 0.60 | 11.245  | 3.636   | 7.00  | 9.00   | 11.00  | 13.00  | 16.00  | 2.888 | 11.824  | 3.787   | 8.00  | 9.00   | 11.00  | 14.00  | 17.00   |
| 0.05 | 2.693 | 0.1815312 | 0.0092496 | 0.70 | 0.60 | 7.099   | 1.785   | 5.00  | 6.00   | 7.00   | 8.00   | 9.00   | 2.888 | 7.440   | 1.863   | 5.00  | 6.00   | 7.00   | 8.00   | 10.00   |
| 0.05 | 2.693 | 0.1815312 | 0.0092496 | 0.60 | 0.60 | 5.149   | 1.068   | 4.00  | 4.00   | 5.00   | 6.00   | 7.00   | 2.888 | 5.345   | 1.080   | 4.00  | 5.00   | 5.00   | 6.00   | 7.00    |
| 0.05 | 2.693 | 0.1815312 | 0.0092496 | 0.50 | 0.60 | 4.008   | 0.714   | 3.00  | 4.00   | 4.00   | 4.00   | 5.00   | 2.888 | 4.179   | 0.719   | 3.00  | 4.00   | 4.00   | 5.00   | 5.00    |
| 0.05 | 2.693 | 0.1815312 | 0.0092496 | 1.10 | 0.50 | 15.126  | 6.729   | 8.00  | 10.00  | 14.00  | 19.00  | 24.00  | 2.888 | 16.202  | 7.163   | 8.00  | 11.00  | 15.00  | 20.00  | 26.00   |
| 0.05 | 2.693 | 0.1815312 | 0.0092496 | 1.20 | 0.50 | 11.119  | 3.895   | 7.00  | 8.00   | 10.00  | 13.00  | 16.00  | 2.888 | 11.786  | 4.202   | 7.00  | 9.00   | 11.00  | 14.00  | 17.00   |
| 0.05 | 2.693 | 0.1815312 | 0.0092496 | 1.30 | 0.50 | 7.957   | 2.332   | 5.00  | 6.00   | 8.00   | 9.00   | 11.00  | 2.888 | 8.350   | 2.427   | 6.00  | 7.00   | 8.00   | 10.00  | 12.00   |
| 0.05 | 2.693 | 0.1815312 | 0.0092496 | 1.40 | 0.50 | 6.097   | 1.576   | 4.00  | 5.00   | 6.00   | 7.00   | 8.00   | 2.888 | 6.368   | 1.627   | 4.00  | 5.00   | 6.00   | 7.00   | 8.00    |
| 0.05 | 2.693 | 0.1815312 | 0.0092496 | 0.90 | 0.50 | 15.169  | 6.793   | 8.00  | 10.00  | 14.00  | 19.00  | 24.00  | 2.888 | 16.156  | 6.955   | 9.00  | 11.00  | 15.00  | 20.00  | 25.00   |
| 0.05 | 2.693 | 0.1815312 | 0.0092496 | 0.80 | 0.50 | 10.529  | 3.308   | 7.00  | 8.00   | 10.00  | 12.00  | 15.00  | 2.888 | 11.067  | 3.477   | 7.00  | 9.00   | 11.00  | 13.00  | 16.00   |
| 0.05 | 2.693 | 0.1815312 | 0.0092496 | 0.70 | 0.50 | 7.023   | 1.727   | 5.00  | 6.00   | 7.00   | 8.00   | 9.00   | 2.888 | 7.376   | 1.795   | 5.00  | 6.00   | 7.00   | 8.00   | 10.00   |
| 0.05 | 2.693 | 0.1815312 | 0.0092496 | 0.60 | 0.50 | 5.135   | 1.045   | 4.00  | 4.00   | 5.00   | 6.00   | 6.00   | 2.888 | 5.348   | 1.086   | 4.00  | 5.00   | 5.00   | 6.00   | 7.00    |
| 0.05 | 2.693 | 0.1815312 | 0.0092496 | 0.50 | 0.50 | 4.000   | 0.712   | 3.00  | 4.00   | 4.00   | 4.00   | 5.00   | 2.888 | 4.188   | 0.714   | 3.00  | 4.00   | 4.00   | 5.00   | 5.00    |
| 0.10 | 2.990 | 0.2591099 | 0.0188559 | 1.00 | 1.00 | 370.596 | 361.021 | 48.00 | 115.00 | 262.00 | 510.25 | 838.00 | 3.164 | 500.156 | 491.339 | 61.00 | 150.00 | 348.00 | 686.00 | 1147.00 |
| 0.10 | 2.990 | 0.2591099 | 0.0188559 | 1.10 | 1.10 | 36.227  | 27.494  | 11.00 | 17.00  | 28.00  | 47.00  | 71.00  | 3.164 | 39.685  | 29.502  | 12.00 | 18.00  | 32.00  | 52.00  | 79.00   |
| 0.10 | 2.990 | 0.2591099 | 0.0188559 | 1.20 | 1.10 | 11.982  | 5.887   | 6.00  | 8.00   | 11.00  | 15.00  | 20.00  | 3.164 | 12.688  | 6.356   | 6.00  | 8.00   | 11.00  | 16.00  | 21.00   |
| 0.10 | 2.990 | 0.2591099 | 0.0188559 | 1.30 | 1.10 | 7.072   | 2.676   | 4.00  | 5.00   | 7.00   | 9.00   | 11.00  | 3.164 | 7.393   | 2.798   | 4.00  | 5.00   | 7.00   | 9.00   | 11.00   |
| 0.10 | 2.990 | 0.2591099 | 0.0188559 | 1.40 | 1.10 | 5.117   | 1.640   | 3.00  | 4.00   | 5.00   | 6.00   | 7.00   | 3.164 | 5.333   | 1.669   | 3.00  | 4.00   | 5.00   | 6.00   | 8.00    |
| 0.10 | 2.990 | 0.2591099 | 0.0188559 | 0.90 | 1.10 | 34.958  | 24.423  | 12.00 | 18.00  | 28.00  | 45.00  | 68.00  | 3.164 | 38.620  | 28.251  | 12.00 | 19.00  | 31.00  | 50.00  | 75.00   |
| 0.10 | 2.990 | 0.2591099 | 0.0188559 | 0.80 | 1.10 | 10.544  | 4.518   | 6.00  | 7.00   | 10.00  | 13.00  | 17.00  | 3.164 | 11.175  | 4.966   | 6.00  | 8.00   | 10.00  | 14.00  | 18.00   |
| 0.10 | 2.990 | 0.2591099 | 0.0188559 | 0.70 | 1.10 | 6.043   | 1.891   | 4.00  | 5.00   | 6.00   | 7.00   | 9.00   | 3.164 | 6.303   | 1.938   | 4.00  | 5.00   | 6.00   | 7.00   | 9.00    |
| 0.10 | 2.990 | 0.2591099 | 0.0188559 | 0.60 | 1.10 | 4.215   | 1.052   | 3.00  | 3.00   | 4.00   | 5.00   | 6.00   | 3.164 | 4.379   | 1.072   | 3.00  | 4.00   | 4.00   | 5.00   | 6.00    |
| 0.10 | 2.990 | 0.2591099 | 0.0188559 | 0.50 | 1.10 | 3.265   | 0.662   | 3.00  | 3.00   | 3.00   | 4.00   | 4.00   | 3.164 | 3.376   | 0.673   | 3.00  | 3.00   | 3.00   | 4.00   | 4.00    |
| 0.10 | 2.990 | 0.2591099 | 0.0188559 | 1.10 | 1.20 | 35.127  | 25.790  | 11.00 | 17.00  | 28.00  | 45.00  | 69.00  | 3.164 | 39.307  | 28.470  | 12.00 | 19.00  | 32.00  | 51.00  | 77.00   |
| 0.10 | 2.990 | 0.2591099 | 0.0188559 | 1.20 | 1.20 | 11.854  | 5.793   | 6.00  | 8.00   | 11.00  | 15.00  | 19.00  | 3.164 | 12.784  | 6.308   | 6.00  | 8.00   | 11.00  | 16.00  | 21.00   |
| 0.10 | 2.990 | 0.2591099 | 0.0188559 | 1.30 | 1.20 | 7.079   | 2.708   | 4.00  | 5.00   | 7.00   | 8.00   | 11.00  | 3.164 | 7.430   | 2.790   | 4.00  | 5.00   | 7.00   | 9.00   | 11.00   |
| 0.10 | 2.990 | 0.2591099 | 0.0188559 | 1.40 | 1.20 | 5.125   | 1.645   | 3.00  | 4.00   | 5.00   | 6.00   | 7.00   | 3.164 | 5.323   | 1.670   | 3.00  | 4.00   | 5.00   | 6.00   | 7.00    |
| 0.10 | 2.990 | 0.2591099 | 0.0188559 | 0.90 | 1.20 | 34.799  | 24.889  | 11.00 | 17.00  | 28.00  | 45.00  | 66.00  | 3.164 | 38.900  | 27.993  | 13.00 | 19.00  | 31.00  | 50.00  | 76.00   |
| 0.10 | 2.990 | 0.2591099 | 0.0188559 | 0.80 | 1.20 | 10.607  | 4.605   | 6.00  | 7.00   | 10.00  | 13.00  | 17.00  | 3.164 | 11.206  | 4.894   | 6.00  | 8.00   | 10.00  | 13.00  | 18.00   |
| 0.10 | 2.990 | 0.2591099 | 0.0188559 | 0.70 | 1.20 | 6.039   | 1.896   | 4.00  | 5.00   | 6.00   | 7.00   | 9.00   | 3.164 | 6.282   | 1.930   | 4.00  | 5.00   | 6.00   | 7.00   | 9.00    |
| 0.10 | 2.990 | 0.2591099 | 0.0188559 | 0.60 | 1.20 | 4.205   | 1.034   | 3.00  | 3.00   | 4.00   | 5.00   | 6.00   | 3.164 | 4.348   | 1.062   | 3.00  | 4.00   | 4.00   | 5.00   | 6.00    |
| 0.10 | 2.990 | 0.2591099 | 0.0188559 | 0.50 | 1.20 | 3.279   | 0.666   | 3.00  | 3.00   | 3.00   | 4.00   | 4.00   | 3.164 | 3.372   | 0.671   | 3.00  | 3.00   | 3.00   | 4.00   | 4.00    |
| 0.10 | 2.990 | 0.2591099 | 0.0188559 | 1.10 | 1.30 | 34.139  | 24.435  | 11.00 | 17.00  | 27.00  | 44.25  | 66.00  | 3.164 | 38.330  | 28.584  | 12.00 | 18.00  | 30.00  | 50.00  | 75.00   |
| 0.10 | 2.990 | 0.2591099 | 0.0188559 | 1.20 | 1.30 | 12.033  | 6.027   | 6.00  | 8.00   | 11.00  | 15.00  | 20.00  | 3.164 | 12.714  | 6.391   | 6.00  | 8.00   | 11.00  | 16.00  | 21.00   |
| 0.10 | 2.990 | 0.2591099 | 0.018855  |      |      |         |         |       |        |        |        |        |       |         |         |       |        |        |        |         |

|      |       |           |           |      |      |         |         |       |        |        |        |        |       |         |         |       |        |        |        |         |
|------|-------|-----------|-----------|------|------|---------|---------|-------|--------|--------|--------|--------|-------|---------|---------|-------|--------|--------|--------|---------|
| 0.10 | 2.990 | 0.2591099 | 0.0188559 | 0.60 | 1.30 | 4.222   | 1.023   | 3.00  | 4.00   | 4.00   | 5.00   | 6.00   | 3.164 | 4.361   | 1.061   | 3.00  | 4.00   | 4.00   | 5.00   | 6.00    |
| 0.10 | 2.990 | 0.2591099 | 0.0188559 | 0.50 | 1.30 | 3.262   | 0.655   | 3.00  | 3.00   | 3.00   | 4.00   | 4.00   | 3.164 | 3.369   | 0.664   | 3.00  | 3.00   | 3.00   | 4.00   | 4.00    |
| 0.10 | 2.990 | 0.2591099 | 0.0188559 | 1.10 | 1.40 | 32.645  | 23.387  | 11.00 | 16.00  | 26.00  | 42.00  | 63.00  | 3.164 | 36.124  | 25.413  | 12.00 | 18.00  | 29.00  | 47.00  | 70.00   |
| 0.10 | 2.990 | 0.2591099 | 0.0188559 | 1.20 | 1.40 | 11.928  | 5.795   | 6.00  | 8.00   | 11.00  | 15.00  | 20.00  | 3.164 | 12.484  | 6.158   | 6.00  | 8.00   | 11.00  | 15.00  | 20.00   |
| 0.10 | 2.990 | 0.2591099 | 0.0188559 | 1.30 | 1.40 | 7.066   | 2.676   | 4.00  | 5.00   | 7.00   | 8.00   | 11.00  | 3.164 | 7.411   | 2.800   | 4.00  | 5.00   | 7.00   | 9.00   | 11.00   |
| 0.10 | 2.990 | 0.2591099 | 0.0188559 | 1.40 | 1.40 | 5.115   | 1.644   | 3.00  | 4.00   | 5.00   | 6.00   | 7.00   | 3.164 | 5.299   | 1.667   | 3.00  | 4.00   | 5.00   | 6.00   | 7.00    |
| 0.10 | 2.990 | 0.2591099 | 0.0188559 | 0.90 | 1.40 | 31.601  | 21.197  | 12.00 | 17.00  | 26.00  | 40.00  | 59.00  | 3.164 | 35.689  | 24.477  | 12.00 | 18.00  | 29.00  | 46.00  | 68.00   |
| 0.10 | 2.990 | 0.2591099 | 0.0188559 | 0.80 | 1.40 | 10.547  | 4.459   | 6.00  | 7.00   | 10.00  | 13.00  | 16.00  | 3.164 | 11.134  | 4.794   | 6.00  | 8.00   | 10.00  | 13.00  | 17.00   |
| 0.10 | 2.990 | 0.2591099 | 0.0188559 | 0.70 | 1.40 | 6.032   | 1.864   | 4.00  | 5.00   | 6.00   | 7.00   | 8.00   | 3.164 | 6.238   | 1.944   | 4.00  | 5.00   | 6.00   | 7.00   | 9.00    |
| 0.10 | 2.990 | 0.2591099 | 0.0188559 | 0.60 | 1.40 | 4.199   | 1.022   | 3.00  | 3.00   | 4.00   | 5.00   | 5.00   | 3.164 | 4.374   | 1.059   | 3.00  | 4.00   | 4.00   | 5.00   | 6.00    |
| 0.10 | 2.990 | 0.2591099 | 0.0188559 | 0.50 | 1.40 | 3.251   | 0.653   | 3.00  | 3.00   | 3.00   | 4.00   | 4.00   | 3.164 | 3.381   | 0.675   | 3.00  | 3.00   | 3.00   | 4.00   | 4.00    |
| 0.10 | 2.990 | 0.2591099 | 0.0188559 | 1.10 | 0.90 | 34.231  | 25.546  | 11.00 | 16.00  | 27.00  | 44.00  | 67.00  | 3.164 | 38.170  | 28.402  | 11.00 | 18.00  | 30.00  | 50.00  | 75.00   |
| 0.10 | 2.990 | 0.2591099 | 0.0188559 | 1.20 | 0.90 | 11.935  | 5.941   | 6.00  | 8.00   | 11.00  | 15.00  | 20.00  | 3.164 | 12.745  | 6.329   | 6.00  | 8.00   | 11.00  | 16.00  | 21.00   |
| 0.10 | 2.990 | 0.2591099 | 0.0188559 | 1.30 | 0.90 | 7.064   | 2.662   | 4.00  | 5.00   | 7.00   | 8.00   | 11.00  | 3.164 | 7.333   | 2.752   | 4.00  | 5.00   | 7.00   | 9.00   | 11.00   |
| 0.10 | 2.990 | 0.2591099 | 0.0188559 | 1.40 | 0.90 | 5.116   | 1.617   | 3.00  | 4.00   | 5.00   | 6.00   | 7.00   | 3.164 | 5.294   | 1.688   | 3.00  | 4.00   | 5.00   | 6.00   | 7.00    |
| 0.10 | 2.990 | 0.2591099 | 0.0188559 | 0.90 | 0.90 | 33.259  | 23.551  | 11.00 | 17.00  | 26.00  | 43.00  | 65.00  | 3.164 | 36.584  | 26.405  | 12.00 | 18.00  | 29.00  | 47.00  | 71.00   |
| 0.10 | 2.990 | 0.2591099 | 0.0188559 | 0.80 | 0.90 | 10.561  | 4.572   | 6.00  | 7.00   | 10.00  | 13.00  | 17.00  | 3.164 | 11.169  | 4.797   | 6.00  | 8.00   | 10.00  | 14.00  | 17.00   |
| 0.10 | 2.990 | 0.2591099 | 0.0188559 | 0.70 | 0.90 | 6.007   | 1.872   | 4.00  | 5.00   | 6.00   | 7.00   | 8.00   | 3.164 | 6.290   | 1.950   | 4.00  | 5.00   | 6.00   | 7.00   | 9.00    |
| 0.10 | 2.990 | 0.2591099 | 0.0188559 | 0.60 | 0.90 | 4.208   | 1.036   | 3.00  | 3.00   | 4.00   | 5.00   | 6.00   | 3.164 | 4.351   | 1.049   | 3.00  | 4.00   | 4.00   | 5.00   | 6.00    |
| 0.10 | 2.990 | 0.2591099 | 0.0188559 | 0.50 | 0.90 | 3.266   | 0.663   | 3.00  | 3.00   | 3.00   | 4.00   | 4.00   | 3.164 | 3.364   | 0.671   | 3.00  | 3.00   | 3.00   | 4.00   | 4.00    |
| 0.10 | 2.990 | 0.2591099 | 0.0188559 | 1.10 | 0.80 | 30.362  | 21.514  | 10.00 | 15.00  | 24.00  | 39.00  | 59.00  | 3.164 | 33.759  | 24.369  | 11.00 | 17.00  | 27.00  | 44.00  | 65.00   |
| 0.10 | 2.990 | 0.2591099 | 0.0188559 | 1.20 | 0.80 | 11.734  | 5.630   | 6.00  | 8.00   | 11.00  | 14.00  | 19.00  | 3.164 | 12.365  | 6.095   | 6.00  | 8.00   | 11.00  | 15.00  | 20.00   |
| 0.10 | 2.990 | 0.2591099 | 0.0188559 | 1.30 | 0.80 | 7.038   | 2.641   | 4.00  | 5.00   | 7.00   | 8.00   | 10.00  | 3.164 | 7.382   | 2.775   | 4.00  | 5.00   | 7.00   | 9.00   | 11.00   |
| 0.10 | 2.990 | 0.2591099 | 0.0188559 | 1.40 | 0.80 | 5.092   | 1.610   | 3.00  | 4.00   | 5.00   | 6.00   | 7.00   | 3.164 | 5.305   | 1.674   | 3.00  | 4.00   | 5.00   | 6.00   | 7.00    |
| 0.10 | 2.990 | 0.2591099 | 0.0188559 | 0.90 | 0.80 | 30.116  | 20.798  | 10.00 | 16.00  | 24.00  | 39.00  | 57.00  | 3.164 | 33.682  | 23.968  | 11.00 | 17.00  | 27.00  | 43.00  | 64.00   |
| 0.10 | 2.990 | 0.2591099 | 0.0188559 | 0.80 | 0.80 | 10.499  | 4.453   | 6.00  | 7.00   | 10.00  | 13.00  | 16.00  | 3.164 | 10.935  | 4.641   | 6.00  | 8.00   | 10.00  | 13.00  | 17.00   |
| 0.10 | 2.990 | 0.2591099 | 0.0188559 | 0.70 | 0.80 | 6.035   | 1.879   | 4.00  | 5.00   | 6.00   | 7.00   | 8.00   | 3.164 | 6.291   | 1.945   | 4.00  | 5.00   | 6.00   | 7.00   | 9.00    |
| 0.10 | 2.990 | 0.2591099 | 0.0188559 | 0.60 | 0.80 | 4.217   | 1.040   | 3.00  | 3.00   | 4.00   | 5.00   | 6.00   | 3.164 | 4.371   | 1.067   | 3.00  | 4.00   | 4.00   | 5.00   | 6.00    |
| 0.10 | 2.990 | 0.2591099 | 0.0188559 | 0.50 | 0.80 | 3.267   | 0.656   | 3.00  | 3.00   | 3.00   | 4.00   | 4.00   | 3.164 | 3.374   | 0.677   | 3.00  | 3.00   | 3.00   | 4.00   | 4.00    |
| 0.10 | 2.990 | 0.2591099 | 0.0188559 | 1.10 | 0.70 | 24.737  | 16.226  | 9.00  | 13.00  | 21.00  | 32.00  | 46.00  | 3.164 | 27.256  | 18.107  | 10.00 | 14.00  | 22.00  | 35.00  | 52.00   |
| 0.10 | 2.990 | 0.2591099 | 0.0188559 | 1.20 | 0.70 | 11.385  | 5.397   | 6.00  | 8.00   | 10.00  | 14.00  | 18.00  | 3.164 | 11.998  | 5.696   | 6.00  | 8.00   | 11.00  | 15.00  | 19.00   |
| 0.10 | 2.990 | 0.2591099 | 0.0188559 | 1.30 | 0.70 | 6.976   | 2.545   | 4.00  | 5.00   | 7.00   | 8.00   | 10.00  | 3.164 | 7.312   | 2.696   | 4.00  | 5.00   | 7.00   | 9.00   | 11.00   |
| 0.10 | 2.990 | 0.2591099 | 0.0188559 | 1.40 | 0.70 | 5.094   | 1.615   | 3.00  | 4.00   | 5.00   | 6.00   | 7.00   | 3.164 | 5.309   | 1.679   | 3.00  | 4.00   | 5.00   | 6.00   | 8.00    |
| 0.10 | 2.990 | 0.2591099 | 0.0188559 | 0.90 | 0.70 | 24.375  | 15.891  | 9.00  | 13.00  | 20.00  | 31.00  | 45.00  | 3.164 | 27.169  | 17.598  | 10.00 | 15.00  | 23.00  | 35.00  | 50.00   |
| 0.10 | 2.990 | 0.2591099 | 0.0188559 | 0.80 | 0.70 | 10.208  | 4.226   | 6.00  | 7.00   | 9.00   | 12.00  | 16.00  | 3.164 | 10.823  | 4.568   | 6.00  | 8.00   | 10.00  | 13.00  | 17.00   |
| 0.10 | 2.990 | 0.2591099 | 0.0188559 | 0.70 | 0.70 | 6.022   | 1.883   | 4.00  | 5.00   | 6.00   | 7.00   | 8.00   | 3.164 | 6.257   | 1.908   | 4.00  | 5.00   | 6.00   | 7.00   | 9.00    |
| 0.10 | 2.990 | 0.2591099 | 0.0188559 | 0.60 | 0.70 | 4.219   | 1.038   | 3.00  | 3.00   | 4.00   | 5.00   | 6.00   | 3.164 | 4.355   | 1.054   | 3.00  | 4.00   | 4.00   | 5.00   | 6.00    |
| 0.10 | 2.990 | 0.2591099 | 0.0188559 | 0.50 | 0.70 | 3.252   | 0.654   | 3.00  | 3.00   | 3.00   | 4.00   | 4.00   | 3.164 | 3.386   | 0.678   | 3.00  | 3.00   | 3.00   | 4.00   | 4.00    |
| 0.10 | 2.990 | 0.2591099 | 0.0188559 | 1.10 | 0.60 | 18.731  | 11.393  | 8.00  | 11.00  | 16.00  | 24.00  | 34.00  | 3.164 | 20.139  | 12.449  | 8.00  | 11.00  | 17.00  | 26.00  | 36.00   |
| 0.10 | 2.990 | 0.2591099 | 0.0188559 | 1.20 | 0.60 | 10.625  | 4.785   | 6.00  | 7.00   | 10.00  | 13.00  | 17.00  | 3.164 | 11.330  | 5.172   | 6.00  | 8.00   | 10.00  | 14.00  | 18.00   |
| 0.10 | 2.990 | 0.2591099 | 0.0188559 | 1.30 | 0.60 | 6.872   | 2.501   | 4.00  | 5.00   | 6.00   | 8.00   | 10.00  | 3.164 | 7.216   | 2.637   | 4.00  | 5.00   | 7.00   | 9.00   | 11.00   |
| 0.10 | 2.990 | 0.2591099 | 0.0188559 | 1.40 | 0.60 | 5.050   | 1.599   | 3.00  | 4.00   | 5.00   | 6.00   | 7.00   | 3.164 | 5.259   | 1.640   | 3.00  | 4.00   | 5.00   | 6.00   | 7.00    |
| 0.10 | 2.990 | 0.2591099 | 0.0188559 | 0.90 | 0.60 | 18.618  | 10.978  | 8.00  | 11.00  | 16.00  | 24.00  | 33.00  | 3.164 | 19.912  | 11.855  | 8.00  | 12.00  | 17.00  | 25.00  | 35.00   |
| 0.10 | 2.990 | 0.2591099 | 0.0188559 | 0.80 | 0.60 | 9.807   | 3.984   | 6.00  | 7.00   | 9.00   | 12.00  | 15.00  | 3.164 | 10.370  | 4.159   | 6.00  | 7.00   | 10.00  | 12.00  | 16.00   |
| 0.10 | 2.990 | 0.2591099 | 0.0188559 | 0.70 | 0.60 | 5.949   | 1.826   | 4.00  | 5.00   | 6.00   | 7.00   | 8.00   | 3.164 | 6.198   | 1.869   | 4.00  | 5.00   | 6.00   | 7.00   | 9.00    |
| 0.10 | 2.990 | 0.2591099 | 0.0188559 | 0.60 | 0.60 | 4.210   | 1.021   | 3.00  | 4.00   | 4.00   | 5.00   | 6.00   | 3.164 | 4.365   | 1.063   | 3.00  | 4.00   | 4.00   | 5.00   | 6.00    |
| 0.10 | 2.990 | 0.2591099 | 0.0188559 | 0.50 | 0.60 | 3.260   | 0.657   | 3.00  | 3.00   | 3.00   | 4.00   | 4.00   | 3.164 | 3.369   | 0.667   | 3.00  | 3.00   | 3.00   | 4.00   | 4.00    |
| 0.10 | 2.990 | 0.2591099 | 0.0188559 | 1.10 | 0.50 | 13.607  | 7.528   | 6.00  | 8.00   | 12.00  | 17.00  | 24.00  | 3.164 | 14.496  | 8.019   | 6.00  | 9.00   | 13.00  | 18.00  | 25.00   |
| 0.10 | 2.990 | 0.2591099 | 0.0188559 | 1.20 | 0.50 | 9.522   | 4.132   | 5.00  | 7.00   | 9.00   | 12.00  | 15.00  | 3.164 | 10.081  | 4.343   | 5.00  | 7.00   | 9.00   | 12.00  | 16.00   |
| 0.10 | 2.990 | 0.2591099 | 0.0188559 | 1.30 | 0.50 | 6.684   | 2.357   | 4.00  | 5.00   | 6.00   | 8.00   | 10.00  | 3.164 | 7.002   | 2.492   | 4.00  | 5.00   | 7.00   | 8.00   | 10.00   |
| 0.10 | 2.990 | 0.2591099 | 0.0188559 | 1.40 | 0.50 | 5.014   | 1.535   | 3.00  | 4.00   | 5.00   | 6.00   | 7.00   | 3.164 | 5.238   | 1.602   | 3.00  | 4.00   | 5.00   | 6.00   | 7.00    |
| 0.10 | 2.990 | 0.2591099 | 0.0188559 | 0.90 | 0.50 | 13.627  | 7.408   | 6.00  | 8.00   | 12.00  | 17.00  | 23.00  | 3.164 | 14.675  | 8.013   | 7.00  | 9.00   | 13.00  | 18.00  | 25.00   |
| 0.10 | 2.990 | 0.2591099 | 0.0188559 | 0.80 | 0.50 | 8.929   | 3.486   | 5.00  | 6.00   | 8.00   | 11.00  | 13.00  | 3.164 | 9.409   | 3.695   | 5.00  | 7.00   | 9.00   | 11.00  | 14.00   |
| 0.10 | 2.990 | 0.2591099 | 0.0188559 | 0.70 | 0.50 | 5.861   | 1.729   | 4.00  | 5.00   | 6.00   | 7.00   | 8.00   | 3.164 | 6.075   | 1.771   | 4.00  | 5.00   | 6.00   | 7.00   | 8.00    |
| 0.10 | 2.990 | 0.2591099 | 0.0188559 | 0.60 | 0.50 | 4.185   | 1.001   | 3.00  | 3.00   | 4.00   | 5.00   | 5.00   | 3.164 | 4.338   | 1.051   | 3.00  | 4.00   | 4.00   | 5.00   | 6.00    |
| 0.10 | 2.990 | 0.2591099 | 0.0188559 | 0.50 | 0.50 | 3.267   | 0.655   | 3.00  | 3.00   | 3.00   | 4.00   | 4.00   | 3.164 | 3.368   | 0.665   | 3.00  | 3.00   | 3.00   | 4.00   | 4.00    |
| 0.15 | 3.108 | 0.3218169 | 0.0287890 | 1.00 | 1.00 | 370.684 | 364.987 | 45.00 | 113.00 | 256.00 | 512.00 | 852.00 | 3.276 | 499.238 | 497.396 | 58.00 | 151.00 | 339.50 | 685.00 | 1141.00 |
| 0.15 | 3.108 | 0.3218169 | 0.0287890 | 1.10 | 1.10 | 40.145  | 32.764  | 10.00 |        |        |        |        |       |         |         |       |        |        |        |         |

|      |       |           |           |      |      |        |        |       |       |       |       |       |       |        |        |       |       |       |       |        |
|------|-------|-----------|-----------|------|------|--------|--------|-------|-------|-------|-------|-------|-------|--------|--------|-------|-------|-------|-------|--------|
| 0.15 | 3.108 | 0.3218169 | 0.0287890 | 0.80 | 1.10 | 10.245 | 5.228  | 5.00  | 7.00  | 9.00  | 13.00 | 17.00 | 3.276 | 11.128 | 5.728  | 5.00  | 7.00  | 10.00 | 14.00 | 18.00  |
| 0.15 | 3.108 | 0.3218169 | 0.0287890 | 0.70 | 1.10 | 5.542  | 1.983  | 3.00  | 4.00  | 5.00  | 7.00  | 8.00  | 3.276 | 5.748  | 2.074  | 4.00  | 4.00  | 5.00  | 7.00  | 8.00   |
| 0.15 | 3.108 | 0.3218169 | 0.0287890 | 0.60 | 1.10 | 3.777  | 1.047  | 3.00  | 3.00  | 4.00  | 4.00  | 5.00  | 3.276 | 3.908  | 1.060  | 3.00  | 3.00  | 4.00  | 4.00  | 5.00   |
| 0.15 | 3.108 | 0.3218169 | 0.0287890 | 0.50 | 1.10 | 2.866  | 0.691  | 2.00  | 2.00  | 3.00  | 3.00  | 4.00  | 3.276 | 2.972  | 0.693  | 2.00  | 3.00  | 3.00  | 3.00  | 4.00   |
| 0.15 | 3.108 | 0.3218169 | 0.0287890 | 1.10 | 1.20 | 40.251 | 33.538 | 10.00 | 17.00 | 30.00 | 53.00 | 84.00 | 3.276 | 45.016 | 37.608 | 11.00 | 18.00 | 34.00 | 60.00 | 94.00  |
| 0.15 | 3.108 | 0.3218169 | 0.0287890 | 1.20 | 1.20 | 11.824 | 6.808  | 5.00  | 7.00  | 10.00 | 15.00 | 21.00 | 3.276 | 12.603 | 7.470  | 5.00  | 7.00  | 11.00 | 16.00 | 22.00  |
| 0.15 | 3.108 | 0.3218169 | 0.0287890 | 1.30 | 1.20 | 6.542  | 2.863  | 3.00  | 5.00  | 6.00  | 8.00  | 10.00 | 3.276 | 6.924  | 3.031  | 4.00  | 5.00  | 6.00  | 8.00  | 11.00  |
| 0.15 | 3.108 | 0.3218169 | 0.0287890 | 1.40 | 1.20 | 4.623  | 1.665  | 3.00  | 3.00  | 4.00  | 5.00  | 7.00  | 3.276 | 4.836  | 1.764  | 3.00  | 4.00  | 5.00  | 6.00  | 7.00   |
| 0.15 | 3.108 | 0.3218169 | 0.0287890 | 0.90 | 1.20 | 40.910 | 33.014 | 11.00 | 18.00 | 31.00 | 54.00 | 85.00 | 3.276 | 48.206 | 39.595 | 12.00 | 20.00 | 36.00 | 64.00 | 100.00 |
| 0.15 | 3.108 | 0.3218169 | 0.0287890 | 0.80 | 1.20 | 10.395 | 5.378  | 5.00  | 7.00  | 9.00  | 13.00 | 17.00 | 3.276 | 11.100 | 5.686  | 5.00  | 7.00  | 10.00 | 14.00 | 19.00  |
| 0.15 | 3.108 | 0.3218169 | 0.0287890 | 0.70 | 1.20 | 5.538  | 1.954  | 3.00  | 4.00  | 5.00  | 7.00  | 8.00  | 3.276 | 5.804  | 2.061  | 4.00  | 4.00  | 5.00  | 7.00  | 8.00   |
| 0.15 | 3.108 | 0.3218169 | 0.0287890 | 0.60 | 1.20 | 3.776  | 1.047  | 3.00  | 3.00  | 4.00  | 4.00  | 5.00  | 3.276 | 3.909  | 1.063  | 3.00  | 3.00  | 4.00  | 4.00  | 5.00   |
| 0.15 | 3.108 | 0.3218169 | 0.0287890 | 0.50 | 1.20 | 2.875  | 0.694  | 2.00  | 2.00  | 3.00  | 3.00  | 4.00  | 3.276 | 2.975  | 0.692  | 2.00  | 3.00  | 3.00  | 3.00  | 4.00   |
| 0.15 | 3.108 | 0.3218169 | 0.0287890 | 1.10 | 1.30 | 39.043 | 31.560 | 10.00 | 17.00 | 30.00 | 52.00 | 81.00 | 3.276 | 43.878 | 36.722 | 11.00 | 18.00 | 33.00 | 58.00 | 92.00  |
| 0.15 | 3.108 | 0.3218169 | 0.0287890 | 1.20 | 1.30 | 11.816 | 6.813  | 5.00  | 7.00  | 10.00 | 15.00 | 21.00 | 3.276 | 12.611 | 7.341  | 5.00  | 7.00  | 11.00 | 16.00 | 22.00  |
| 0.15 | 3.108 | 0.3218169 | 0.0287890 | 1.30 | 1.30 | 6.588  | 2.814  | 4.00  | 5.00  | 6.00  | 8.00  | 10.00 | 3.276 | 6.904  | 2.996  | 4.00  | 5.00  | 6.00  | 8.00  | 11.00  |
| 0.15 | 3.108 | 0.3218169 | 0.0287890 | 1.40 | 1.30 | 4.624  | 1.663  | 3.00  | 3.00  | 4.00  | 5.00  | 7.00  | 3.276 | 4.800  | 1.735  | 3.00  | 4.00  | 4.50  | 6.00  | 7.00   |
| 0.15 | 3.108 | 0.3218169 | 0.0287890 | 0.90 | 1.30 | 40.036 | 32.128 | 11.00 | 18.00 | 30.00 | 53.00 | 81.00 | 3.276 | 46.780 | 38.429 | 12.00 | 20.00 | 35.00 | 62.00 | 96.00  |
| 0.15 | 3.108 | 0.3218169 | 0.0287890 | 0.80 | 1.30 | 10.339 | 5.347  | 5.00  | 7.00  | 9.00  | 13.00 | 17.00 | 3.276 | 11.054 | 5.682  | 5.00  | 7.00  | 10.00 | 14.00 | 18.00  |
| 0.15 | 3.108 | 0.3218169 | 0.0287890 | 0.70 | 1.30 | 5.536  | 1.952  | 3.00  | 4.00  | 5.00  | 7.00  | 8.00  | 3.276 | 5.796  | 2.049  | 4.00  | 4.00  | 5.00  | 7.00  | 8.00   |
| 0.15 | 3.108 | 0.3218169 | 0.0287890 | 0.60 | 1.30 | 3.774  | 1.042  | 3.00  | 3.00  | 4.00  | 4.00  | 5.00  | 3.276 | 3.924  | 1.082  | 3.00  | 3.00  | 4.00  | 4.00  | 5.00   |
| 0.15 | 3.108 | 0.3218169 | 0.0287890 | 0.50 | 1.30 | 2.866  | 0.681  | 2.00  | 2.00  | 3.00  | 3.00  | 4.00  | 3.276 | 2.966  | 0.676  | 2.00  | 3.00  | 3.00  | 3.00  | 4.00   |
| 0.15 | 3.108 | 0.3218169 | 0.0287890 | 1.10 | 1.40 | 37.503 | 30.036 | 10.00 | 16.00 | 29.00 | 50.00 | 75.00 | 3.276 | 43.018 | 35.267 | 11.00 | 18.00 | 33.00 | 57.25 | 88.00  |
| 0.15 | 3.108 | 0.3218169 | 0.0287890 | 1.20 | 1.40 | 11.762 | 6.659  | 5.00  | 7.00  | 10.00 | 15.00 | 21.00 | 3.276 | 12.621 | 7.257  | 5.00  | 8.00  | 11.00 | 16.00 | 22.00  |
| 0.15 | 3.108 | 0.3218169 | 0.0287890 | 1.30 | 1.40 | 6.592  | 2.900  | 4.00  | 5.00  | 6.00  | 8.00  | 10.00 | 3.276 | 6.951  | 3.022  | 4.00  | 5.00  | 6.00  | 8.00  | 11.00  |
| 0.15 | 3.108 | 0.3218169 | 0.0287890 | 1.40 | 1.40 | 4.637  | 1.679  | 3.00  | 3.00  | 4.00  | 5.00  | 7.00  | 3.276 | 4.809  | 1.725  | 3.00  | 4.00  | 5.00  | 6.00  | 7.00   |
| 0.15 | 3.108 | 0.3218169 | 0.0287890 | 0.90 | 1.40 | 38.630 | 31.183 | 11.00 | 17.00 | 29.00 | 50.00 | 79.00 | 3.276 | 45.804 | 36.924 | 12.00 | 20.00 | 35.00 | 60.00 | 93.00  |
| 0.15 | 3.108 | 0.3218169 | 0.0287890 | 0.80 | 1.40 | 10.344 | 5.192  | 5.00  | 7.00  | 9.00  | 13.00 | 17.00 | 3.276 | 11.046 | 5.588  | 5.00  | 7.00  | 10.00 | 14.00 | 18.00  |
| 0.15 | 3.108 | 0.3218169 | 0.0287890 | 0.70 | 1.40 | 5.519  | 1.992  | 3.00  | 4.00  | 5.00  | 6.00  | 8.00  | 3.276 | 5.744  | 2.034  | 4.00  | 4.00  | 5.00  | 7.00  | 8.00   |
| 0.15 | 3.108 | 0.3218169 | 0.0287890 | 0.60 | 1.40 | 3.771  | 1.044  | 3.00  | 3.00  | 4.00  | 4.00  | 5.00  | 3.276 | 3.915  | 1.075  | 3.00  | 3.00  | 4.00  | 4.00  | 5.00   |
| 0.15 | 3.108 | 0.3218169 | 0.0287890 | 0.50 | 1.40 | 2.878  | 0.687  | 2.00  | 2.00  | 3.00  | 3.00  | 4.00  | 3.276 | 2.971  | 0.696  | 2.00  | 3.00  | 3.00  | 3.00  | 4.00   |
| 0.15 | 3.108 | 0.3218169 | 0.0287890 | 1.10 | 0.90 | 37.350 | 30.550 | 9.00  | 16.00 | 28.00 | 49.00 | 77.00 | 3.276 | 43.066 | 35.699 | 11.00 | 18.00 | 32.00 | 57.00 | 89.00  |
| 0.15 | 3.108 | 0.3218169 | 0.0287890 | 1.20 | 0.90 | 11.847 | 6.858  | 5.00  | 7.00  | 10.00 | 15.00 | 21.00 | 3.276 | 12.460 | 7.197  | 5.00  | 7.00  | 11.00 | 16.00 | 22.00  |
| 0.15 | 3.108 | 0.3218169 | 0.0287890 | 1.30 | 0.90 | 6.573  | 2.849  | 4.00  | 5.00  | 6.00  | 8.00  | 10.00 | 3.276 | 6.901  | 3.010  | 4.00  | 5.00  | 6.00  | 8.00  | 11.00  |
| 0.15 | 3.108 | 0.3218169 | 0.0287890 | 1.40 | 0.90 | 4.638  | 1.667  | 3.00  | 3.00  | 4.00  | 5.00  | 7.00  | 3.276 | 4.830  | 1.718  | 3.00  | 4.00  | 5.00  | 6.00  | 7.00   |
| 0.15 | 3.108 | 0.3218169 | 0.0287890 | 0.90 | 0.90 | 38.835 | 30.898 | 10.00 | 17.00 | 30.00 | 51.00 | 79.00 | 3.276 | 44.428 | 36.084 | 11.00 | 19.00 | 33.00 | 59.00 | 93.00  |
| 0.15 | 3.108 | 0.3218169 | 0.0287890 | 0.80 | 0.90 | 10.381 | 5.270  | 5.00  | 7.00  | 9.00  | 13.00 | 17.00 | 3.276 | 10.905 | 5.498  | 5.00  | 7.00  | 10.00 | 13.00 | 18.00  |
| 0.15 | 3.108 | 0.3218169 | 0.0287890 | 0.70 | 0.90 | 5.515  | 1.963  | 3.00  | 4.00  | 5.00  | 7.00  | 8.00  | 3.276 | 5.773  | 2.078  | 4.00  | 4.00  | 5.00  | 7.00  | 8.00   |
| 0.15 | 3.108 | 0.3218169 | 0.0287890 | 0.60 | 0.90 | 3.752  | 1.027  | 3.00  | 3.00  | 4.00  | 4.00  | 5.00  | 3.276 | 3.902  | 1.088  | 3.00  | 3.00  | 4.00  | 4.00  | 5.00   |
| 0.15 | 3.108 | 0.3218169 | 0.0287890 | 0.50 | 0.90 | 2.875  | 0.681  | 2.00  | 2.00  | 3.00  | 3.00  | 4.00  | 3.276 | 2.966  | 0.683  | 2.00  | 3.00  | 3.00  | 3.00  | 4.00   |
| 0.15 | 3.108 | 0.3218169 | 0.0287890 | 1.10 | 0.80 | 32.389 | 25.708 | 9.00  | 14.00 | 25.00 | 43.00 | 65.00 | 3.276 | 37.219 | 30.586 | 10.00 | 16.00 | 28.00 | 49.00 | 77.00  |
| 0.15 | 3.108 | 0.3218169 | 0.0287890 | 1.20 | 0.80 | 11.436 | 6.494  | 5.00  | 7.00  | 10.00 | 14.00 | 20.00 | 3.276 | 12.315 | 7.089  | 5.00  | 7.00  | 11.00 | 15.00 | 22.00  |
| 0.15 | 3.108 | 0.3218169 | 0.0287890 | 1.30 | 0.80 | 6.541  | 2.839  | 4.00  | 5.00  | 6.00  | 8.00  | 10.00 | 3.276 | 6.868  | 2.964  | 4.00  | 5.00  | 6.00  | 8.00  | 11.00  |
| 0.15 | 3.108 | 0.3218169 | 0.0287890 | 1.40 | 0.80 | 4.618  | 1.662  | 3.00  | 3.00  | 4.00  | 5.00  | 7.00  | 3.276 | 4.802  | 1.701  | 3.00  | 4.00  | 5.00  | 6.00  | 7.00   |
| 0.15 | 3.108 | 0.3218169 | 0.0287890 | 0.90 | 0.80 | 33.324 | 26.149 | 9.00  | 15.00 | 26.00 | 43.00 | 67.00 | 3.276 | 38.790 | 31.370 | 11.00 | 17.00 | 30.00 | 51.00 | 79.00  |
| 0.15 | 3.108 | 0.3218169 | 0.0287890 | 0.80 | 0.80 | 10.284 | 5.224  | 5.00  | 7.00  | 9.00  | 13.00 | 17.00 | 3.276 | 10.949 | 5.592  | 5.00  | 7.00  | 10.00 | 13.00 | 18.00  |
| 0.15 | 3.108 | 0.3218169 | 0.0287890 | 0.70 | 0.80 | 5.507  | 1.970  | 3.00  | 4.00  | 5.00  | 7.00  | 8.00  | 3.276 | 5.711  | 2.017  | 4.00  | 4.00  | 5.00  | 7.00  | 8.00   |
| 0.15 | 3.108 | 0.3218169 | 0.0287890 | 0.60 | 0.80 | 3.766  | 1.044  | 3.00  | 3.00  | 4.00  | 4.00  | 5.00  | 3.276 | 3.938  | 1.089  | 3.00  | 3.00  | 4.00  | 4.00  | 5.00   |
| 0.15 | 3.108 | 0.3218169 | 0.0287890 | 0.50 | 0.80 | 2.871  | 0.681  | 2.00  | 2.00  | 3.00  | 3.00  | 4.00  | 3.276 | 2.979  | 0.699  | 2.00  | 3.00  | 3.00  | 3.00  | 4.00   |
| 0.15 | 3.108 | 0.3218169 | 0.0287890 | 1.10 | 0.70 | 25.693 | 19.034 | 8.00  | 12.00 | 20.00 | 34.00 | 51.00 | 3.276 | 28.677 | 22.135 | 8.00  | 13.00 | 22.00 | 37.00 | 58.00  |
| 0.15 | 3.108 | 0.3218169 | 0.0287890 | 1.20 | 0.70 | 11.109 | 6.239  | 5.00  | 7.00  | 10.00 | 14.00 | 19.00 | 3.276 | 11.769 | 6.522  | 5.00  | 7.00  | 10.00 | 15.00 | 20.00  |
| 0.15 | 3.108 | 0.3218169 | 0.0287890 | 1.30 | 0.70 | 6.452  | 2.787  | 4.00  | 4.00  | 6.00  | 8.00  | 10.00 | 3.276 | 6.774  | 2.855  | 4.00  | 5.00  | 6.00  | 8.00  | 10.00  |
| 0.15 | 3.108 | 0.3218169 | 0.0287890 | 1.40 | 0.70 | 4.613  | 1.639  | 3.00  | 3.00  | 4.00  | 5.00  | 7.00  | 3.276 | 4.789  | 1.676  | 3.00  | 4.00  | 5.00  | 6.00  | 7.00   |
| 0.15 | 3.108 | 0.3218169 | 0.0287890 | 0.90 | 0.70 | 25.873 | 18.845 | 8.00  | 13.00 | 20.00 | 34.00 | 50.00 | 3.276 | 29.512 | 22.273 | 9.00  | 14.00 | 23.00 | 38.00 | 59.00  |
| 0.15 | 3.108 | 0.3218169 | 0.0287890 | 0.80 | 0.70 | 9.876  | 4.822  | 5.00  | 6.00  | 9.00  | 12.00 | 16.00 | 3.276 | 10.571 | 5.230  | 5.00  | 7.00  | 9.00  | 13.00 | 17.00  |
| 0.15 | 3.108 | 0.3218169 | 0.0287890 | 0.70 | 0.70 | 5.495  | 1.949  | 3.00  | 4.00  | 5.00  | 6.00  | 8.00  | 3.276 | 5.729  | 2.011  | 4.00  | 4.00  | 5.00  | 7.00  | 8.00   |
| 0.15 | 3.108 | 0.3218169 | 0.0287890 | 0.60 | 0.70 | 3.768  | 1.025  | 3.00  | 3.00  | 4.00  | 4.00  | 5.00  | 3.276 | 3.902  | 1.050  | 3.00  | 3.00  | 4.00  | 4.00  | 5.00   |
| 0.15 | 3.108 | 0.3218169 | 0.0287890 | 0.50 | 0.70 | 2.874  | 0.676  | 2.00  | 2.00  |       |       |       |       |        |        |       |       |       |       |        |

|      |       |           |           |      |      |        |        |      |       |       |       |       |       |        |        |      |       |       |       |       |
|------|-------|-----------|-----------|------|------|--------|--------|------|-------|-------|-------|-------|-------|--------|--------|------|-------|-------|-------|-------|
| 0.15 | 3.108 | 0.3218169 | 0.0287890 | 0.90 | 0.60 | 18.661 | 12.590 | 7.00 | 10.00 | 15.00 | 24.00 | 35.00 | 3.276 | 20.902 | 14.628 | 7.00 | 11.00 | 17.00 | 27.00 | 40.00 |
| 0.15 | 3.108 | 0.3218169 | 0.0287890 | 0.80 | 0.60 | 9.273  | 4.366  | 5.00 | 6.00  | 8.00  | 11.00 | 15.00 | 3.276 | 9.883  | 4.674  | 5.00 | 7.00  | 9.00  | 12.00 | 16.00 |
| 0.15 | 3.108 | 0.3218169 | 0.0287890 | 0.70 | 0.60 | 5.428  | 1.878  | 3.00 | 4.00  | 5.00  | 6.00  | 8.00  | 3.276 | 5.673  | 1.973  | 4.00 | 4.00  | 5.00  | 7.00  | 8.00  |
| 0.15 | 3.108 | 0.3218169 | 0.0287890 | 0.60 | 0.60 | 3.755  | 1.038  | 3.00 | 3.00  | 4.00  | 4.00  | 5.00  | 3.276 | 3.900  | 1.063  | 3.00 | 3.00  | 4.00  | 4.00  | 5.00  |
| 0.15 | 3.108 | 0.3218169 | 0.0287890 | 0.50 | 0.60 | 2.876  | 0.685  | 2.00 | 2.00  | 3.00  | 3.00  | 4.00  | 3.276 | 2.971  | 0.700  | 2.00 | 3.00  | 3.00  | 3.00  | 4.00  |
| 0.15 | 3.108 | 0.3218169 | 0.0287890 | 1.10 | 0.50 | 13.045 | 8.138  | 5.00 | 7.00  | 11.00 | 17.00 | 24.00 | 3.276 | 14.227 | 8.979  | 5.00 | 8.00  | 12.00 | 18.00 | 26.00 |
| 0.15 | 3.108 | 0.3218169 | 0.0287890 | 1.20 | 0.50 | 8.965  | 4.495  | 4.00 | 6.00  | 8.00  | 11.00 | 15.00 | 3.276 | 9.425  | 4.662  | 5.00 | 6.00  | 8.00  | 12.00 | 16.00 |
| 0.15 | 3.108 | 0.3218169 | 0.0287890 | 1.30 | 0.50 | 6.114  | 2.477  | 3.00 | 4.00  | 6.00  | 7.00  | 9.00  | 3.276 | 6.353  | 2.589  | 4.00 | 4.00  | 6.00  | 8.00  | 10.00 |
| 0.15 | 3.108 | 0.3218169 | 0.0287890 | 1.40 | 0.50 | 4.528  | 1.555  | 3.00 | 3.00  | 4.00  | 5.00  | 7.00  | 3.276 | 4.702  | 1.600  | 3.00 | 4.00  | 4.00  | 6.00  | 7.00  |
| 0.15 | 3.108 | 0.3218169 | 0.0287890 | 0.90 | 0.50 | 13.208 | 8.182  | 5.00 | 7.00  | 11.00 | 17.00 | 24.00 | 3.276 | 14.263 | 8.937  | 6.00 | 8.00  | 12.00 | 18.00 | 26.00 |
| 0.15 | 3.108 | 0.3218169 | 0.0287890 | 0.80 | 0.50 | 8.412  | 3.830  | 4.00 | 6.00  | 8.00  | 10.00 | 13.00 | 3.276 | 8.934  | 4.032  | 5.00 | 6.00  | 8.00  | 11.00 | 14.00 |
| 0.15 | 3.108 | 0.3218169 | 0.0287890 | 0.70 | 0.50 | 5.303  | 1.775  | 3.00 | 4.00  | 5.00  | 6.00  | 8.00  | 3.276 | 5.574  | 1.888  | 4.00 | 4.00  | 5.00  | 7.00  | 8.00  |
| 0.15 | 3.108 | 0.3218169 | 0.0287890 | 0.60 | 0.50 | 3.730  | 1.012  | 3.00 | 3.00  | 4.00  | 4.00  | 5.00  | 3.276 | 3.903  | 1.047  | 3.00 | 3.00  | 4.00  | 4.00  | 5.00  |
| 0.15 | 3.108 | 0.3218169 | 0.0287890 | 0.50 | 0.50 | 2.870  | 0.686  | 2.00 | 2.00  | 3.00  | 3.00  | 4.00  | 3.276 | 2.977  | 0.688  | 2.00 | 3.00  | 3.00  | 3.00  | 4.00  |

 $ARL_0 = 370$ 
 $ARL_0 = 500$ 

| Case 3<br>$\phi=80$ |       |           |           |      |      |         |         |       |        |        |        |        |       |         |         |       |        |        |        |         |
|---------------------|-------|-----------|-----------|------|------|---------|---------|-------|--------|--------|--------|--------|-------|---------|---------|-------|--------|--------|--------|---------|
| 0.05                | 2.707 | 0.1806445 | 0.0092291 | 1.00 | 1.00 | 370.278 | 351.550 | 53.00 | 117.00 | 257.00 | 512.00 | 834.00 | 2.887 | 500.015 | 480.233 | 66.00 | 154.00 | 350.00 | 690.00 | 1114.10 |
| 0.05                | 2.707 | 0.1806445 | 0.0092291 | 1.10 | 1.10 | 52.111  | 36.445  | 18.00 | 27.00  | 42.00  | 68.00  | 99.00  | 2.887 | 57.441  | 40.389  | 19.00 | 29.00  | 47.00  | 74.00  | 110.00  |
| 0.05                | 2.707 | 0.1806445 | 0.0092291 | 1.20 | 1.10 | 19.632  | 9.412   | 10.00 | 13.00  | 18.00  | 24.00  | 32.00  | 2.887 | 20.709  | 9.745   | 10.00 | 14.00  | 19.00  | 25.00  | 34.00   |
| 0.05                | 2.707 | 0.1806445 | 0.0092291 | 1.30 | 1.10 | 11.886  | 4.485   | 7.00  | 9.00   | 11.00  | 14.00  | 18.00  | 2.887 | 12.451  | 4.662   | 7.00  | 9.00   | 12.00  | 15.00  | 19.00   |
| 0.05                | 2.707 | 0.1806445 | 0.0092291 | 1.40 | 1.10 | 8.671   | 2.790   | 5.90  | 7.00   | 8.00   | 10.00  | 12.00  | 2.887 | 9.008   | 2.852   | 6.00  | 7.00   | 9.00   | 11.00  | 13.00   |
| 0.05                | 2.707 | 0.1806445 | 0.0092291 | 0.90 | 1.10 | 50.118  | 33.381  | 18.00 | 27.00  | 41.00  | 64.00  | 93.00  | 2.887 | 55.854  | 38.349  | 20.00 | 29.00  | 45.00  | 72.00  | 105.00  |
| 0.05                | 2.707 | 0.1806445 | 0.0092291 | 0.80 | 1.10 | 17.366  | 7.289   | 10.00 | 12.00  | 16.00  | 21.00  | 27.00  | 2.887 | 18.554  | 7.744   | 10.00 | 13.00  | 17.00  | 23.00  | 29.00   |
| 0.05                | 2.707 | 0.1806445 | 0.0092291 | 0.70 | 1.10 | 10.192  | 3.213   | 7.00  | 8.00   | 10.00  | 12.00  | 14.00  | 2.887 | 10.626  | 3.246   | 7.00  | 8.00   | 10.00  | 12.00  | 15.00   |
| 0.05                | 2.707 | 0.1806445 | 0.0092291 | 0.60 | 1.10 | 7.079   | 1.720   | 5.00  | 6.00   | 7.00   | 8.00   | 9.00   | 2.887 | 7.431   | 1.808   | 5.00  | 6.00   | 7.00   | 8.00   | 10.00   |
| 0.05                | 2.707 | 0.1806445 | 0.0092291 | 0.50 | 1.10 | 5.467   | 1.112   | 4.00  | 5.00   | 5.00   | 6.00   | 7.00   | 2.887 | 5.667   | 1.154   | 4.00  | 5.00   | 6.00   | 7.00   | 8.00    |
| 0.05                | 2.707 | 0.1806445 | 0.0092291 | 1.10 | 1.20 | 49.336  | 33.376  | 18.00 | 26.00  | 41.00  | 64.00  | 92.00  | 2.887 | 54.080  | 37.333  | 19.00 | 28.00  | 44.00  | 69.00  | 102.00  |
| 0.05                | 2.707 | 0.1806445 | 0.0092291 | 1.20 | 1.20 | 19.559  | 9.285   | 10.00 | 13.00  | 18.00  | 24.00  | 32.00  | 2.887 | 20.656  | 9.733   | 10.00 | 14.00  | 19.00  | 25.00  | 33.00   |
| 0.05                | 2.707 | 0.1806445 | 0.0092291 | 1.30 | 1.20 | 11.851  | 4.420   | 7.00  | 9.00   | 11.00  | 14.00  | 18.00  | 2.887 | 12.458  | 4.722   | 7.00  | 9.00   | 12.00  | 15.00  | 19.00   |
| 0.05                | 2.707 | 0.1806445 | 0.0092291 | 1.40 | 1.20 | 8.605   | 2.738   | 5.00  | 7.00   | 8.00   | 10.00  | 12.00  | 2.887 | 9.021   | 2.851   | 6.00  | 7.00   | 9.00   | 11.00  | 13.00   |
| 0.05                | 2.707 | 0.1806445 | 0.0092291 | 0.90 | 1.20 | 47.792  | 30.755  | 18.00 | 26.00  | 40.00  | 61.00  | 89.00  | 2.887 | 53.106  | 34.610  | 20.00 | 29.00  | 44.00  | 67.00  | 99.00   |
| 0.05                | 2.707 | 0.1806445 | 0.0092291 | 0.80 | 1.20 | 17.591  | 7.518   | 10.00 | 12.00  | 16.00  | 21.00  | 28.00  | 2.887 | 18.420  | 7.757   | 10.00 | 13.00  | 17.00  | 22.00  | 29.00   |
| 0.05                | 2.707 | 0.1806445 | 0.0092291 | 0.70 | 1.20 | 10.127  | 3.082   | 7.00  | 8.00   | 10.00  | 12.00  | 14.00  | 2.887 | 10.597  | 3.259   | 7.00  | 8.00   | 10.00  | 12.00  | 15.00   |
| 0.05                | 2.707 | 0.1806445 | 0.0092291 | 0.60 | 1.20 | 7.140   | 1.755   | 5.00  | 6.00   | 7.00   | 8.00   | 9.00   | 2.887 | 7.403   | 1.805   | 5.00  | 6.00   | 7.00   | 8.00   | 10.00   |
| 0.05                | 2.707 | 0.1806445 | 0.0092291 | 0.50 | 1.20 | 5.431   | 1.086   | 4.00  | 5.00   | 5.00   | 6.00   | 7.00   | 2.887 | 5.671   | 1.137   | 4.00  | 5.00   | 6.00   | 7.00   | 8.00    |
| 0.05                | 2.707 | 0.1806445 | 0.0092291 | 1.10 | 1.30 | 44.489  | 28.697  | 17.00 | 24.00  | 37.00  | 56.00  | 81.00  | 2.887 | 49.384  | 32.085  | 19.00 | 27.00  | 41.00  | 63.00  | 91.10   |
| 0.05                | 2.707 | 0.1806445 | 0.0092291 | 1.20 | 1.30 | 19.338  | 8.963   | 10.00 | 13.00  | 18.00  | 24.00  | 31.00  | 2.887 | 20.536  | 9.610   | 10.00 | 14.00  | 19.00  | 25.00  | 33.00   |
| 0.05                | 2.707 | 0.1806445 | 0.0092291 | 1.30 | 1.30 | 11.877  | 4.465   | 7.00  | 9.00   | 11.00  | 14.00  | 18.00  | 2.887 | 12.416  | 4.585   | 7.00  | 9.00   | 12.00  | 15.00  | 18.00   |
| 0.05                | 2.707 | 0.1806445 | 0.0092291 | 1.40 | 1.30 | 8.596   | 2.711   | 6.00  | 7.00   | 8.00   | 10.00  | 12.00  | 2.887 | 9.008   | 2.848   | 6.00  | 7.00   | 9.00   | 11.00  | 13.00   |
| 0.05                | 2.707 | 0.1806445 | 0.0092291 | 0.90 | 1.30 | 43.469  | 26.279  | 18.00 | 25.00  | 37.00  | 55.00  | 79.00  | 2.887 | 48.187  | 30.061  | 19.00 | 27.00  | 40.00  | 61.00  | 87.00   |
| 0.05                | 2.707 | 0.1806445 | 0.0092291 | 0.80 | 1.30 | 17.260  | 7.220   | 10.00 | 12.00  | 16.00  | 21.00  | 27.00  | 2.887 | 18.461  | 7.707   | 10.00 | 13.00  | 17.00  | 22.00  | 29.00   |
| 0.05                | 2.707 | 0.1806445 | 0.0092291 | 0.70 | 1.30 | 10.195  | 3.143   | 7.00  | 8.00   | 10.00  | 12.00  | 14.00  | 2.887 | 10.609  | 3.230   | 7.00  | 8.00   | 10.00  | 12.00  | 15.00   |
| 0.05                | 2.707 | 0.1806445 | 0.0092291 | 0.60 | 1.30 | 7.099   | 1.751   | 5.00  | 6.00   | 7.00   | 8.00   | 9.00   | 2.887 | 7.402   | 1.796   | 5.00  | 6.00   | 7.00   | 8.00   | 10.00   |
| 0.05                | 2.707 | 0.1806445 | 0.0092291 | 0.50 | 1.30 | 5.429   | 1.089   | 4.00  | 5.00   | 5.00   | 6.00   | 7.00   | 2.887 | 5.670   | 1.151   | 4.00  | 5.00   | 6.00   | 7.00   | 8.00    |
| 0.05                | 2.707 | 0.1806445 | 0.0092291 | 1.10 | 1.40 | 39.753  | 23.862  | 16.00 | 23.00  | 34.00  | 50.00  | 70.00  | 2.887 | 44.146  | 26.593  | 18.00 | 26.00  | 38.00  | 55.00  | 78.00   |
| 0.05                | 2.707 | 0.1806445 | 0.0092291 | 1.20 | 1.40 | 19.075  | 8.830   | 10.00 | 13.00  | 17.00  | 23.00  | 31.00  | 2.887 | 20.307  | 9.290   | 10.00 | 14.00  | 18.00  | 25.00  | 33.00   |
| 0.05                | 2.707 | 0.1806445 | 0.0092291 | 1.30 | 1.40 | 11.798  | 4.404   | 7.00  | 9.00   | 11.00  | 14.00  | 18.00  | 2.887 | 12.579  | 4.653   | 7.00  | 9.00   | 12.00  | 15.00  | 19.00   |
| 0.05                | 2.707 | 0.1806445 | 0.0092291 | 1.40 | 1.40 | 8.597   | 2.764   | 5.00  | 7.00   | 8.00   | 10.00  | 12.00  | 2.887 | 8.990   | 2.840   | 6.00  | 7.00   | 9.00   | 11.00  | 13.00   |
| 0.05                | 2.707 | 0.1806445 | 0.0092291 | 0.90 | 1.40 | 39.467  | 22.407  | 17.00 | 23.00  | 34.00  | 50.00  | 69.00  | 2.887 | 43.285  | 24.432  | 19.00 | 26.00  | 37.00  | 54.00  | 75.00   |
| 0.05                | 2.707 | 0.1806445 | 0.0092291 | 0.80 | 1.40 | 17.342  | 7.129   | 10.00 | 12.00  | 16.00  | 21.00  | 27.00  | 2.887 | 18.255  | 7.469   | 10.00 | 13.00  | 17.00  | 22.00  | 28.00   |
| 0.05                | 2.707 | 0.1806445 | 0.0092291 | 0.70 | 1.40 | 10.167  | 3.166   | 7.00  | 8.00   | 10.00  | 12.00  | 14.00  | 2.887 | 10.683  | 3.330   | 7.00  | 8.00   | 10.00  | 12.00  | 15.00   |
| 0.05                | 2.707 | 0.1806445 | 0.0092291 | 0.60 | 1.40 | 7.100   | 1.743   | 5.00  | 6.00   | 7.00   | 8.00   | 9.00   | 2.887 | 7.409   | 1.818   | 5.00  | 6.00   | 7.00   | 8.00   | 10.00   |
| 0.05                | 2.707 | 0.1806445 | 0.0092291 | 0.50 | 1.40 | 5.466   | 1.117   | 4.00  | 5.00   | 5.00   | 6.00   | 7.00   | 2.887 | 5.668   | 1.142   | 4.00  | 5.00   | 6.00   | 7.00   | 8.00    |
| 0.05                | 2.707 | 0.1806445 | 0.0092291 | 1.10 | 0.90 | 48.831  | 33.900  | 17.00 | 25.00  | 40.00  | 63.00  | 93.00  | 2.887 | 54.914  | 38.418  | 19.00 | 28.00  | 45.00  | 71.00  | 104.00  |
| 0.05                | 2.707 | 0.1806445 | 0.0092291 | 1.20 | 0.90 | 19.366  | 9.052   | 10.00 | 13.00  | 18.00  | 24.00  | 31.00  | 2.887 | 20.569  | 9.766   | 10.00 | 13.75  | 19.00  | 26.00  | 33.00   |
| 0.05                | 2.707 | 0.1806445 | 0.0092291 | 1.30 | 0.90 | 11.882  | 4.496   | 7.00  | 9.00   | 11.00  | 14.00  | 18.00  | 2.887 | 12.483  | 4.748   | 7.00  | 9.00   | 12.00  | 15.00  | 19.00   |
| 0.05                | 2.707 | 0.1806445 | 0.0092291 | 1.40 | 0.90 | 8.661   | 2.818   | 5.00  | 7.00   | 8.00   | 10.00  | 12.00  | 2.887 | 9.015   | 2.851   | 6.00  | 7.00   | 9.00   | 11.00  | 13.00   |
| 0.05                | 2.707 | 0.1806445 | 0.0092291 | 0.90 | 0.90 | 47.985  | 32.363  | 18.00 | 26.00  | 39.00  | 61.00  | 89.00  | 2.887 | 52.824  | 35.609  |       |        |        |        |         |

|      |       |           |           |      |      |         |         |       |        |        |        |        |       |         |         |       |        |        |        |         |
|------|-------|-----------|-----------|------|------|---------|---------|-------|--------|--------|--------|--------|-------|---------|---------|-------|--------|--------|--------|---------|
| 0.05 | 2.707 | 0.1806445 | 0.0092291 | 0.50 | 0.90 | 5.454   | 1.095   | 4.00  | 5.00   | 5.00   | 6.00   | 7.00   | 2.887 | 5.662   | 1.132   | 4.00  | 5.00   | 6.00   | 6.00   | 7.00    |
| 0.05 | 2.707 | 0.1806445 | 0.0092291 | 1.10 | 0.80 | 41.058  | 26.440  | 15.00 | 22.00  | 35.00  | 53.00  | 75.00  | 2.887 | 44.974  | 29.861  | 17.00 | 24.00  | 37.00  | 57.00  | 84.00   |
| 0.05 | 2.707 | 0.1806445 | 0.0092291 | 1.20 | 0.80 | 18.997  | 8.853   | 10.00 | 13.00  | 17.00  | 23.00  | 31.00  | 2.887 | 20.188  | 9.592   | 10.00 | 13.00  | 18.00  | 25.00  | 33.00   |
| 0.05 | 2.707 | 0.1806445 | 0.0092291 | 1.30 | 0.80 | 11.820  | 4.467   | 7.00  | 9.00   | 11.00  | 14.00  | 18.00  | 2.887 | 12.335  | 4.612   | 7.00  | 9.00   | 12.00  | 15.00  | 18.00   |
| 0.05 | 2.707 | 0.1806445 | 0.0092291 | 1.40 | 0.80 | 8.623   | 2.738   | 6.00  | 7.00   | 8.00   | 10.00  | 12.00  | 2.887 | 8.960   | 2.839   | 6.00  | 7.00   | 9.00   | 11.00  | 13.00   |
| 0.05 | 2.707 | 0.1806445 | 0.0092291 | 0.90 | 0.80 | 40.382  | 25.263  | 16.00 | 23.00  | 34.00  | 51.00  | 73.00  | 2.887 | 44.755  | 28.568  | 17.00 | 25.00  | 37.00  | 57.00  | 82.00   |
| 0.05 | 2.707 | 0.1806445 | 0.0092291 | 0.80 | 0.80 | 17.033  | 7.018   | 10.00 | 12.00  | 16.00  | 21.00  | 26.00  | 2.887 | 18.070  | 7.350   | 10.00 | 13.00  | 17.00  | 22.00  | 28.00   |
| 0.05 | 2.707 | 0.1806445 | 0.0092291 | 0.70 | 0.80 | 10.046  | 3.052   | 7.00  | 8.00   | 10.00  | 12.00  | 14.00  | 2.887 | 10.550  | 3.230   | 7.00  | 8.00   | 10.00  | 12.00  | 15.00   |
| 0.05 | 2.707 | 0.1806445 | 0.0092291 | 0.60 | 0.80 | 7.118   | 1.752   | 5.00  | 6.00   | 7.00   | 8.00   | 9.00   | 2.887 | 7.427   | 1.803   | 5.00  | 6.00   | 7.00   | 8.00   | 10.00   |
| 0.05 | 2.707 | 0.1806445 | 0.0092291 | 0.50 | 0.80 | 5.458   | 1.111   | 4.00  | 5.00   | 5.00   | 6.00   | 7.00   | 2.887 | 5.670   | 1.126   | 4.00  | 5.00   | 6.00   | 6.00   | 7.00    |
| 0.05 | 2.707 | 0.1806445 | 0.0092291 | 1.10 | 0.70 | 30.649  | 17.814  | 13.00 | 18.00  | 26.00  | 39.00  | 54.00  | 2.887 | 33.680  | 19.856  | 14.00 | 19.00  | 29.00  | 43.00  | 60.00   |
| 0.05 | 2.707 | 0.1806445 | 0.0092291 | 1.20 | 0.70 | 17.790  | 7.880   | 9.00  | 12.00  | 16.00  | 22.00  | 28.00  | 2.887 | 18.890  | 8.446   | 10.00 | 13.00  | 17.00  | 23.00  | 30.00   |
| 0.05 | 2.707 | 0.1806445 | 0.0092291 | 1.30 | 0.70 | 11.580  | 4.193   | 7.00  | 9.00   | 11.00  | 14.00  | 17.00  | 2.887 | 12.093  | 4.384   | 7.00  | 9.00   | 11.00  | 14.00  | 18.00   |
| 0.05 | 2.707 | 0.1806445 | 0.0092291 | 1.40 | 0.70 | 8.576   | 2.727   | 6.00  | 7.00   | 8.00   | 10.00  | 12.00  | 2.887 | 8.969   | 2.790   | 6.00  | 7.00   | 9.00   | 10.00  | 13.00   |
| 0.05 | 2.707 | 0.1806445 | 0.0092291 | 0.90 | 0.70 | 30.809  | 17.574  | 13.00 | 18.00  | 27.00  | 39.00  | 54.00  | 2.887 | 33.635  | 19.370  | 14.00 | 20.00  | 29.00  | 42.00  | 58.00   |
| 0.05 | 2.707 | 0.1806445 | 0.0092291 | 0.80 | 0.70 | 16.361  | 6.556   | 9.00  | 12.00  | 15.00  | 19.00  | 25.00  | 2.887 | 17.216  | 6.916   | 10.00 | 12.00  | 16.00  | 21.00  | 26.00   |
| 0.05 | 2.707 | 0.1806445 | 0.0092291 | 0.70 | 0.70 | 10.081  | 3.064   | 7.00  | 8.00   | 10.00  | 12.00  | 14.00  | 2.887 | 10.526  | 3.163   | 7.00  | 8.00   | 10.00  | 12.00  | 15.00   |
| 0.05 | 2.707 | 0.1806445 | 0.0092291 | 0.60 | 0.70 | 7.094   | 1.741   | 5.00  | 6.00   | 7.00   | 8.00   | 9.00   | 2.887 | 7.400   | 1.785   | 5.00  | 6.00   | 7.00   | 8.00   | 10.00   |
| 0.05 | 2.707 | 0.1806445 | 0.0092291 | 0.50 | 0.70 | 5.441   | 1.104   | 4.00  | 5.00   | 5.00   | 6.00   | 7.00   | 2.887 | 5.642   | 1.124   | 4.00  | 5.00   | 5.00   | 6.00   | 7.00    |
| 0.05 | 2.707 | 0.1806445 | 0.0092291 | 1.10 | 0.60 | 22.387  | 11.707  | 10.00 | 14.00  | 20.00  | 28.00  | 38.00  | 2.887 | 23.756  | 12.646  | 11.00 | 15.00  | 21.00  | 30.00  | 40.00   |
| 0.05 | 2.707 | 0.1806445 | 0.0092291 | 1.20 | 0.60 | 15.856  | 6.704   | 9.00  | 11.00  | 15.00  | 19.00  | 25.00  | 2.887 | 16.649  | 7.012   | 9.00  | 12.00  | 15.00  | 20.00  | 26.00   |
| 0.05 | 2.707 | 0.1806445 | 0.0092291 | 1.30 | 0.60 | 11.217  | 4.000   | 7.00  | 8.00   | 11.00  | 13.00  | 16.00  | 2.887 | 11.815  | 4.146   | 7.00  | 9.00   | 11.00  | 14.00  | 17.00   |
| 0.05 | 2.707 | 0.1806445 | 0.0092291 | 1.40 | 0.60 | 8.499   | 2.616   | 5.00  | 7.00   | 8.00   | 10.00  | 12.00  | 2.887 | 8.862   | 2.699   | 6.00  | 7.00   | 9.00   | 10.00  | 12.00   |
| 0.05 | 2.707 | 0.1806445 | 0.0092291 | 0.90 | 0.60 | 22.267  | 11.558  | 10.00 | 14.00  | 20.00  | 28.00  | 38.00  | 2.887 | 23.843  | 12.265  | 11.00 | 15.00  | 21.00  | 30.00  | 40.00   |
| 0.05 | 2.707 | 0.1806445 | 0.0092291 | 0.80 | 0.60 | 14.914  | 5.741   | 9.00  | 11.00  | 14.00  | 18.00  | 22.00  | 2.887 | 15.805  | 5.974   | 9.00  | 12.00  | 15.00  | 19.00  | 24.00   |
| 0.05 | 2.707 | 0.1806445 | 0.0092291 | 0.70 | 0.60 | 9.823   | 2.903   | 7.00  | 8.00   | 9.00   | 11.00  | 14.00  | 2.887 | 10.331  | 3.024   | 7.00  | 8.00   | 10.00  | 12.00  | 14.00   |
| 0.05 | 2.707 | 0.1806445 | 0.0092291 | 0.60 | 0.60 | 7.054   | 1.723   | 5.00  | 6.00   | 7.00   | 8.00   | 9.00   | 2.887 | 7.349   | 1.748   | 5.00  | 6.00   | 7.00   | 8.00   | 10.00   |
| 0.05 | 2.707 | 0.1806445 | 0.0092291 | 0.50 | 0.60 | 5.438   | 1.084   | 4.00  | 5.00   | 5.00   | 6.00   | 7.00   | 2.887 | 5.663   | 1.135   | 4.00  | 5.00   | 6.00   | 6.00   | 7.00    |
| 0.05 | 2.707 | 0.1806445 | 0.0092291 | 1.10 | 0.50 | 15.826  | 7.506   | 8.00  | 10.00  | 14.00  | 19.00  | 26.00  | 2.887 | 16.888  | 8.078   | 8.00  | 11.00  | 15.00  | 21.00  | 28.00   |
| 0.05 | 2.707 | 0.1806445 | 0.0092291 | 1.20 | 0.50 | 13.433  | 5.367   | 7.00  | 10.00  | 12.00  | 16.00  | 21.00  | 2.887 | 14.192  | 5.564   | 8.00  | 10.00  | 13.00  | 17.00  | 22.00   |
| 0.05 | 2.707 | 0.1806445 | 0.0092291 | 1.30 | 0.50 | 10.398  | 3.462   | 6.00  | 8.00   | 10.00  | 12.00  | 15.00  | 2.887 | 10.966  | 3.702   | 7.00  | 8.00   | 10.00  | 13.00  | 16.00   |
| 0.05 | 2.707 | 0.1806445 | 0.0092291 | 1.40 | 0.50 | 8.221   | 2.461   | 5.00  | 6.00   | 8.00   | 10.00  | 11.00  | 2.887 | 8.663   | 2.576   | 6.00  | 7.00   | 8.00   | 10.00  | 12.00   |
| 0.05 | 2.707 | 0.1806445 | 0.0092291 | 0.90 | 0.50 | 16.037  | 7.534   | 8.00  | 11.00  | 14.00  | 20.00  | 26.00  | 2.887 | 16.960  | 8.058   | 9.00  | 11.00  | 15.00  | 21.00  | 27.00   |
| 0.05 | 2.707 | 0.1806445 | 0.0092291 | 0.80 | 0.50 | 12.937  | 4.699   | 8.00  | 9.75   | 12.00  | 16.00  | 19.00  | 2.887 | 13.645  | 4.930   | 8.00  | 10.00  | 13.00  | 16.00  | 20.00   |
| 0.05 | 2.707 | 0.1806445 | 0.0092291 | 0.70 | 0.50 | 9.508   | 2.749   | 6.00  | 8.00   | 9.00   | 11.00  | 13.00  | 2.887 | 9.914   | 2.839   | 7.00  | 8.00   | 9.00   | 11.00  | 14.00   |
| 0.05 | 2.707 | 0.1806445 | 0.0092291 | 0.60 | 0.50 | 6.999   | 1.642   | 5.00  | 6.00   | 7.00   | 8.00   | 9.00   | 2.887 | 7.304   | 1.683   | 5.00  | 6.00   | 7.00   | 8.00   | 9.00    |
| 0.05 | 2.707 | 0.1806445 | 0.0092291 | 0.50 | 0.50 | 5.439   | 1.106   | 4.00  | 5.00   | 5.00   | 6.00   | 7.00   | 2.887 | 5.654   | 1.133   | 4.00  | 5.00   | 5.00   | 6.00   | 7.00    |
| 0.10 | 2.989 | 0.2591572 | 0.0188247 | 1.00 | 1.00 | 369.285 | 363.063 | 47.00 | 111.00 | 257.00 | 509.00 | 827.00 | 3.165 | 500.538 | 486.596 | 61.00 | 147.00 | 346.00 | 702.00 | 1148.00 |
| 0.10 | 2.989 | 0.2591572 | 0.0188247 | 1.10 | 1.10 | 60.286  | 50.640  | 14.00 | 25.00  | 45.00  | 80.00  | 126.00 | 3.165 | 69.672  | 59.006  | 16.00 | 28.00  | 52.00  | 93.00  | 146.10  |
| 0.10 | 2.989 | 0.2591572 | 0.0188247 | 1.20 | 1.10 | 19.220  | 11.610  | 8.00  | 11.00  | 16.00  | 25.00  | 34.00  | 3.165 | 20.613  | 12.778  | 8.00  | 12.00  | 17.00  | 26.00  | 37.00   |
| 0.10 | 2.989 | 0.2591572 | 0.0188247 | 1.30 | 1.10 | 10.620  | 5.018   | 5.00  | 7.00   | 10.00  | 13.00  | 17.00  | 3.165 | 11.277  | 5.335   | 6.00  | 8.00   | 10.00  | 14.00  | 18.00   |
| 0.10 | 2.989 | 0.2591572 | 0.0188247 | 1.40 | 1.10 | 7.379   | 2.903   | 4.00  | 5.00   | 7.00   | 9.00   | 11.00  | 3.165 | 7.777   | 3.062   | 4.00  | 6.00   | 7.00   | 9.00   | 12.00   |
| 0.10 | 2.989 | 0.2591572 | 0.0188247 | 0.90 | 1.10 | 63.016  | 51.049  | 16.00 | 26.00  | 48.00  | 83.00  | 131.00 | 3.165 | 74.811  | 62.526  | 18.00 | 31.00  | 56.00  | 100.00 | 156.00  |
| 0.10 | 2.989 | 0.2591572 | 0.0188247 | 0.80 | 1.10 | 16.971  | 9.124   | 8.00  | 11.00  | 15.00  | 21.00  | 29.00  | 3.165 | 18.257  | 9.781   | 8.00  | 11.00  | 16.00  | 23.00  | 31.00   |
| 0.10 | 2.989 | 0.2591572 | 0.0188247 | 0.70 | 1.10 | 8.944   | 3.484   | 5.00  | 6.00   | 8.00   | 11.00  | 13.00  | 3.165 | 9.329   | 3.564   | 6.00  | 7.00   | 9.00   | 11.00  | 14.00   |
| 0.10 | 2.989 | 0.2591572 | 0.0188247 | 0.60 | 1.10 | 5.968   | 1.781   | 4.00  | 5.00   | 6.00   | 7.00   | 8.00   | 3.165 | 6.252   | 1.848   | 4.00  | 5.00   | 6.00   | 7.00   | 9.00    |
| 0.10 | 2.989 | 0.2591572 | 0.0188247 | 0.50 | 1.10 | 4.484   | 1.086   | 3.00  | 4.00   | 4.00   | 5.00   | 6.00   | 3.165 | 4.624   | 1.101   | 3.00  | 4.00   | 4.00   | 5.00   | 6.00    |
| 0.10 | 2.989 | 0.2591572 | 0.0188247 | 1.10 | 1.20 | 57.592  | 47.134  | 15.00 | 24.00  | 44.00  | 76.00  | 118.00 | 3.165 | 66.256  | 55.463  | 16.00 | 27.00  | 50.00  | 88.00  | 139.00  |
| 0.10 | 2.989 | 0.2591572 | 0.0188247 | 1.20 | 1.20 | 19.028  | 11.496  | 8.00  | 11.00  | 16.00  | 24.00  | 34.00  | 3.165 | 20.387  | 12.474  | 8.00  | 12.00  | 17.00  | 26.00  | 37.00   |
| 0.10 | 2.989 | 0.2591572 | 0.0188247 | 1.30 | 1.20 | 10.657  | 5.062   | 5.00  | 7.00   | 10.00  | 13.00  | 17.00  | 3.165 | 11.322  | 5.387   | 6.00  | 8.00   | 10.00  | 14.00  | 18.00   |
| 0.10 | 2.989 | 0.2591572 | 0.0188247 | 1.40 | 1.20 | 7.422   | 2.901   | 4.00  | 5.00   | 7.00   | 9.00   | 11.00  | 3.165 | 7.759   | 3.033   | 4.00  | 6.00   | 7.00   | 9.00   | 12.00   |
| 0.10 | 2.989 | 0.2591572 | 0.0188247 | 0.90 | 1.20 | 60.285  | 48.644  | 16.00 | 26.00  | 46.00  | 80.00  | 121.00 | 3.165 | 72.526  | 60.283  | 18.00 | 30.00  | 55.00  | 95.00  | 151.00  |
| 0.10 | 2.989 | 0.2591572 | 0.0188247 | 0.80 | 1.20 | 16.792  | 8.975   | 8.00  | 10.00  | 14.00  | 21.00  | 29.00  | 3.165 | 18.117  | 9.791   | 8.00  | 11.00  | 16.00  | 23.00  | 31.00   |
| 0.10 | 2.989 | 0.2591572 | 0.0188247 | 0.70 | 1.20 | 8.936   | 3.414   | 5.00  | 6.00   | 8.00   | 11.00  | 13.00  | 3.165 | 9.308   | 3.520   | 6.00  | 7.00   | 9.00   | 11.00  | 14.00   |
| 0.10 | 2.989 | 0.2591572 | 0.0188247 | 0.60 | 1.20 | 5.971   | 1.809   | 4.00  | 5.00   | 6.00   | 7.00   | 8.00   | 3.165 | 6.204   | 1.832   | 4.00  | 5.00   | 6.00   | 7.00   | 9.00    |
| 0.10 | 2.989 | 0.2591572 | 0.0188247 | 0.50 | 1.20 | 4.480   | 1.082   | 3.00  | 4.00   | 4.00   | 5.00   | 6.00   | 3.165 | 4.644   | 1.119   | 3.00  | 4.00   | 4.00   | 5.00   | 6.00    |
| 0.10 | 2.989 | 0.2591572 | 0.0188247 | 1.10 | 1.30 | 52.983  | 42.788  | 14.00 | 23.00  | 41.00  | 70.00  | 109.00 | 3.165 | 60.610  |         |       |        |        |        |         |

|      |       |           |           |      |      |        |        |       |       |       |       |        |       |        |        |       |       |       |       |        |
|------|-------|-----------|-----------|------|------|--------|--------|-------|-------|-------|-------|--------|-------|--------|--------|-------|-------|-------|-------|--------|
| 0.10 | 2.989 | 0.2591572 | 0.0188247 | 0.70 | 1.30 | 8.937  | 3.443  | 5.00  | 6.00  | 8.00  | 11.00 | 13.00  | 3.165 | 9.406  | 3.619  | 6.00  | 7.00  | 9.00  | 11.00 | 14.00  |
| 0.10 | 2.989 | 0.2591572 | 0.0188247 | 0.60 | 1.30 | 5.939  | 1.796  | 4.00  | 5.00  | 6.00  | 7.00  | 8.00   | 3.165 | 6.206  | 1.843  | 4.00  | 5.00  | 6.00  | 7.00  | 9.00   |
| 0.10 | 2.989 | 0.2591572 | 0.0188247 | 0.50 | 1.30 | 4.486  | 1.101  | 3.00  | 4.00  | 4.00  | 5.00  | 6.00   | 3.165 | 4.656  | 1.114  | 3.00  | 4.00  | 4.00  | 5.00  | 6.00   |
| 0.10 | 2.989 | 0.2591572 | 0.0188247 | 1.10 | 1.40 | 47.255 | 36.025 | 14.00 | 22.00 | 37.00 | 63.00 | 94.00  | 3.165 | 55.926 | 44.460 | 15.00 | 25.00 | 43.00 | 74.00 | 114.00 |
| 0.10 | 2.989 | 0.2591572 | 0.0188247 | 1.20 | 1.40 | 18.736 | 11.114 | 8.00  | 11.00 | 16.00 | 24.00 | 33.00  | 3.165 | 19.995 | 11.947 | 8.00  | 11.00 | 17.00 | 25.00 | 36.00  |
| 0.10 | 2.989 | 0.2591572 | 0.0188247 | 1.30 | 1.40 | 10.569 | 5.025  | 5.00  | 7.00  | 10.00 | 13.00 | 17.00  | 3.165 | 11.155 | 5.181  | 6.00  | 7.00  | 10.00 | 14.00 | 18.00  |
| 0.10 | 2.989 | 0.2591572 | 0.0188247 | 1.40 | 1.40 | 7.386  | 2.931  | 4.00  | 5.00  | 7.00  | 9.00  | 11.00  | 3.165 | 7.786  | 3.039  | 4.00  | 6.00  | 7.00  | 9.00  | 12.00  |
| 0.10 | 2.989 | 0.2591572 | 0.0188247 | 0.90 | 1.40 | 50.135 | 38.522 | 15.00 | 23.00 | 39.00 | 65.00 | 100.00 | 3.165 | 59.460 | 46.614 | 17.00 | 27.00 | 45.00 | 78.00 | 120.00 |
| 0.10 | 2.989 | 0.2591572 | 0.0188247 | 0.80 | 1.40 | 16.694 | 8.758  | 8.00  | 10.00 | 15.00 | 21.00 | 28.00  | 3.165 | 17.947 | 9.393  | 9.00  | 11.00 | 16.00 | 22.00 | 30.00  |
| 0.10 | 2.989 | 0.2591572 | 0.0188247 | 0.70 | 1.40 | 8.883  | 3.416  | 5.00  | 6.00  | 8.00  | 10.00 | 13.00  | 3.165 | 9.336  | 3.555  | 6.00  | 7.00  | 9.00  | 11.00 | 14.00  |
| 0.10 | 2.989 | 0.2591572 | 0.0188247 | 0.60 | 1.40 | 5.971  | 1.783  | 4.00  | 5.00  | 6.00  | 7.00  | 8.00   | 3.165 | 6.231  | 1.851  | 4.00  | 5.00  | 6.00  | 7.00  | 9.00   |
| 0.10 | 2.989 | 0.2591572 | 0.0188247 | 0.50 | 1.40 | 4.467  | 1.090  | 3.00  | 4.00  | 4.00  | 5.00  | 6.00   | 3.165 | 4.648  | 1.108  | 3.00  | 4.00  | 4.00  | 5.00  | 6.00   |
| 0.10 | 2.989 | 0.2591572 | 0.0188247 | 1.10 | 0.90 | 53.616 | 43.489 | 14.00 | 23.00 | 41.00 | 72.00 | 111.00 | 3.165 | 61.229 | 51.395 | 15.00 | 25.00 | 46.00 | 81.00 | 128.00 |
| 0.10 | 2.989 | 0.2591572 | 0.0188247 | 1.20 | 0.90 | 18.767 | 11.535 | 8.00  | 11.00 | 16.00 | 23.00 | 34.00  | 3.165 | 20.152 | 12.340 | 8.00  | 12.00 | 17.00 | 25.00 | 36.00  |
| 0.10 | 2.989 | 0.2591572 | 0.0188247 | 1.30 | 0.90 | 10.538 | 5.034  | 5.00  | 7.00  | 9.00  | 13.00 | 17.00  | 3.165 | 11.170 | 5.312  | 6.00  | 7.00  | 10.00 | 14.00 | 18.00  |
| 0.10 | 2.989 | 0.2591572 | 0.0188247 | 1.40 | 0.90 | 7.345  | 2.842  | 4.00  | 5.00  | 7.00  | 9.00  | 11.00  | 3.165 | 7.750  | 3.039  | 4.00  | 6.00  | 7.00  | 9.00  | 12.00  |
| 0.10 | 2.989 | 0.2591572 | 0.0188247 | 0.90 | 0.90 | 58.509 | 48.302 | 15.00 | 25.00 | 44.00 | 77.00 | 119.00 | 3.165 | 67.150 | 55.390 | 17.00 | 28.00 | 51.00 | 88.00 | 139.00 |
| 0.10 | 2.989 | 0.2591572 | 0.0188247 | 0.80 | 0.90 | 16.644 | 8.990  | 8.00  | 10.00 | 14.00 | 21.00 | 28.00  | 3.165 | 18.148 | 10.010 | 8.00  | 11.00 | 16.00 | 22.00 | 31.00  |
| 0.10 | 2.989 | 0.2591572 | 0.0188247 | 0.70 | 0.90 | 8.837  | 3.425  | 5.00  | 6.00  | 8.00  | 10.00 | 13.00  | 3.165 | 9.397  | 3.603  | 6.00  | 7.00  | 9.00  | 11.00 | 14.00  |
| 0.10 | 2.989 | 0.2591572 | 0.0188247 | 0.60 | 0.90 | 5.961  | 1.774  | 4.00  | 5.00  | 6.00  | 7.00  | 8.00   | 3.165 | 6.241  | 1.854  | 4.00  | 5.00  | 6.00  | 7.00  | 9.00   |
| 0.10 | 2.989 | 0.2591572 | 0.0188247 | 0.50 | 0.90 | 4.475  | 1.085  | 3.00  | 4.00  | 4.00  | 5.00  | 6.00   | 3.165 | 4.646  | 1.137  | 3.00  | 4.00  | 4.00  | 5.00  | 6.00   |
| 0.10 | 2.989 | 0.2591572 | 0.0188247 | 1.10 | 0.80 | 43.264 | 34.146 | 12.00 | 19.00 | 34.00 | 57.00 | 87.00  | 3.165 | 49.387 | 39.399 | 13.00 | 22.00 | 38.00 | 64.25 | 101.00 |
| 0.10 | 2.989 | 0.2591572 | 0.0188247 | 1.20 | 0.80 | 18.025 | 10.926 | 7.00  | 10.00 | 15.00 | 23.00 | 32.00  | 3.165 | 19.464 | 11.697 | 8.00  | 11.00 | 17.00 | 24.00 | 34.00  |
| 0.10 | 2.989 | 0.2591572 | 0.0188247 | 1.30 | 0.80 | 10.529 | 4.870  | 5.00  | 7.00  | 10.00 | 13.00 | 17.00  | 3.165 | 11.176 | 5.280  | 6.00  | 7.00  | 10.00 | 14.00 | 18.00  |
| 0.10 | 2.989 | 0.2591572 | 0.0188247 | 1.40 | 0.80 | 7.353  | 2.836  | 4.00  | 5.00  | 7.00  | 9.00  | 11.00  | 3.165 | 7.748  | 3.036  | 4.00  | 6.00  | 7.00  | 9.00  | 12.00  |
| 0.10 | 2.989 | 0.2591572 | 0.0188247 | 0.90 | 0.80 | 45.163 | 35.222 | 13.00 | 21.00 | 35.00 | 58.00 | 91.00  | 3.165 | 52.076 | 40.407 | 15.00 | 23.00 | 40.00 | 68.00 | 106.00 |
| 0.10 | 2.989 | 0.2591572 | 0.0188247 | 0.80 | 0.80 | 16.296 | 8.620  | 8.00  | 10.00 | 14.00 | 20.00 | 28.00  | 3.165 | 17.723 | 9.452  | 8.00  | 11.00 | 16.00 | 22.00 | 30.10  |
| 0.10 | 2.989 | 0.2591572 | 0.0188247 | 0.70 | 0.80 | 8.866  | 3.434  | 5.00  | 6.00  | 8.00  | 11.00 | 13.00  | 3.165 | 9.285  | 3.604  | 5.00  | 7.00  | 9.00  | 11.00 | 14.00  |
| 0.10 | 2.989 | 0.2591572 | 0.0188247 | 0.60 | 0.80 | 5.972  | 1.760  | 4.00  | 5.00  | 6.00  | 7.00  | 8.00   | 3.165 | 6.230  | 1.831  | 4.00  | 5.00  | 6.00  | 7.00  | 9.00   |
| 0.10 | 2.989 | 0.2591572 | 0.0188247 | 0.50 | 0.80 | 4.486  | 1.107  | 3.00  | 4.00  | 4.00  | 5.00  | 6.00   | 3.165 | 4.653  | 1.106  | 3.00  | 4.00  | 4.00  | 5.00  | 6.00   |
| 0.10 | 2.989 | 0.2591572 | 0.0188247 | 1.10 | 0.70 | 31.181 | 22.479 | 10.00 | 15.00 | 25.00 | 40.00 | 60.00  | 3.165 | 34.294 | 25.108 | 11.00 | 16.00 | 27.00 | 45.00 | 67.00  |
| 0.10 | 2.989 | 0.2591572 | 0.0188247 | 1.20 | 0.70 | 16.541 | 9.348  | 7.00  | 10.00 | 14.00 | 21.00 | 29.00  | 3.165 | 18.022 | 10.246 | 8.00  | 11.00 | 16.00 | 23.00 | 32.00  |
| 0.10 | 2.989 | 0.2591572 | 0.0188247 | 1.30 | 0.70 | 10.225 | 4.727  | 5.00  | 7.00  | 9.00  | 12.00 | 16.00  | 3.165 | 10.818 | 4.909  | 6.00  | 7.00  | 10.00 | 13.00 | 17.00  |
| 0.10 | 2.989 | 0.2591572 | 0.0188247 | 1.40 | 0.70 | 7.291  | 2.798  | 4.00  | 5.00  | 7.00  | 9.00  | 11.00  | 3.165 | 7.706  | 2.998  | 4.00  | 6.00  | 7.00  | 9.00  | 12.00  |
| 0.10 | 2.989 | 0.2591572 | 0.0188247 | 0.90 | 0.70 | 31.801 | 22.855 | 10.00 | 16.00 | 26.00 | 41.00 | 62.00  | 3.165 | 35.668 | 26.316 | 11.00 | 17.00 | 28.00 | 46.00 | 69.00  |
| 0.10 | 2.989 | 0.2591572 | 0.0188247 | 0.80 | 0.70 | 15.122 | 7.868  | 7.00  | 10.00 | 13.00 | 19.00 | 25.00  | 3.165 | 16.295 | 8.273  | 8.00  | 10.00 | 14.00 | 20.00 | 27.00  |
| 0.10 | 2.989 | 0.2591572 | 0.0188247 | 0.70 | 0.70 | 8.723  | 3.282  | 5.00  | 6.00  | 8.00  | 10.00 | 13.00  | 3.165 | 9.165  | 3.409  | 6.00  | 7.00  | 9.00  | 11.00 | 14.00  |
| 0.10 | 2.989 | 0.2591572 | 0.0188247 | 0.60 | 0.70 | 5.946  | 1.760  | 4.00  | 5.00  | 6.00  | 7.00  | 8.00   | 3.165 | 6.210  | 1.851  | 4.00  | 5.00  | 6.00  | 7.00  | 9.00   |
| 0.10 | 2.989 | 0.2591572 | 0.0188247 | 0.50 | 0.70 | 4.481  | 1.085  | 3.00  | 4.00  | 4.00  | 5.00  | 6.00   | 3.165 | 4.647  | 1.099  | 3.00  | 4.00  | 4.00  | 5.00  | 6.00   |
| 0.10 | 2.989 | 0.2591572 | 0.0188247 | 1.10 | 0.60 | 20.775 | 13.524 | 8.00  | 11.00 | 17.00 | 27.00 | 39.00  | 3.165 | 22.761 | 14.943 | 8.00  | 12.00 | 19.00 | 29.00 | 43.00  |
| 0.10 | 2.989 | 0.2591572 | 0.0188247 | 1.20 | 0.60 | 14.142 | 7.510  | 7.00  | 9.00  | 12.00 | 18.00 | 24.00  | 3.165 | 15.126 | 8.025  | 7.00  | 9.00  | 13.00 | 19.00 | 26.00  |
| 0.10 | 2.989 | 0.2591572 | 0.0188247 | 1.30 | 0.60 | 9.753  | 4.298  | 5.00  | 7.00  | 9.00  | 12.00 | 15.00  | 3.165 | 10.334 | 4.621  | 5.00  | 7.00  | 9.00  | 13.00 | 16.00  |
| 0.10 | 2.989 | 0.2591572 | 0.0188247 | 1.40 | 0.60 | 7.201  | 2.724  | 4.00  | 5.00  | 7.00  | 9.00  | 11.00  | 3.165 | 7.553  | 2.857  | 4.00  | 6.00  | 7.00  | 9.00  | 11.00  |
| 0.10 | 2.989 | 0.2591572 | 0.0188247 | 0.90 | 0.60 | 21.443 | 14.093 | 8.00  | 12.00 | 18.00 | 27.00 | 39.00  | 3.165 | 23.396 | 15.361 | 9.00  | 13.00 | 19.00 | 30.00 | 43.00  |
| 0.10 | 2.989 | 0.2591572 | 0.0188247 | 0.80 | 0.60 | 13.510 | 6.538  | 7.00  | 9.00  | 12.00 | 17.00 | 22.00  | 3.165 | 14.405 | 6.997  | 7.00  | 9.00  | 13.00 | 18.00 | 24.00  |
| 0.10 | 2.989 | 0.2591572 | 0.0188247 | 0.70 | 0.60 | 8.488  | 3.114  | 5.00  | 6.00  | 8.00  | 10.00 | 13.00  | 3.165 | 8.948  | 3.263  | 5.00  | 7.00  | 8.00  | 11.00 | 13.00  |
| 0.10 | 2.989 | 0.2591572 | 0.0188247 | 0.60 | 0.60 | 5.904  | 1.686  | 4.00  | 5.00  | 6.00  | 7.00  | 8.00   | 3.165 | 6.153  | 1.791  | 4.00  | 5.00  | 6.00  | 7.00  | 9.00   |
| 0.10 | 2.989 | 0.2591572 | 0.0188247 | 0.50 | 0.60 | 4.461  | 1.062  | 3.00  | 4.00  | 4.00  | 5.00  | 6.00   | 3.165 | 4.654  | 1.106  | 3.00  | 4.00  | 5.00  | 5.00  | 6.00   |
| 0.10 | 2.989 | 0.2591572 | 0.0188247 | 1.10 | 0.50 | 14.484 | 8.330  | 6.00  | 9.00  | 12.00 | 18.00 | 25.00  | 3.165 | 15.264 | 8.892  | 6.90  | 9.00  | 13.00 | 19.00 | 27.00  |
| 0.10 | 2.989 | 0.2591572 | 0.0188247 | 1.20 | 0.50 | 11.703 | 5.727  | 6.00  | 8.00  | 10.00 | 14.00 | 19.00  | 3.165 | 12.483 | 6.228  | 6.00  | 8.00  | 11.00 | 15.00 | 21.00  |
| 0.10 | 2.989 | 0.2591572 | 0.0188247 | 1.30 | 0.50 | 8.863  | 3.703  | 5.00  | 6.00  | 8.00  | 11.00 | 14.00  | 3.165 | 9.437  | 3.979  | 5.00  | 7.00  | 9.00  | 11.00 | 15.00  |
| 0.10 | 2.989 | 0.2591572 | 0.0188247 | 1.40 | 0.50 | 6.908  | 2.509  | 4.00  | 5.00  | 6.00  | 8.00  | 10.00  | 3.165 | 7.225  | 2.612  | 4.00  | 5.00  | 7.00  | 9.00  | 11.00  |
| 0.10 | 2.989 | 0.2591572 | 0.0188247 | 0.90 | 0.50 | 14.488 | 8.426  | 6.00  | 8.00  | 12.00 | 18.00 | 26.00  | 3.165 | 15.451 | 9.031  | 7.00  | 9.00  | 13.00 | 19.00 | 27.00  |
| 0.10 | 2.989 | 0.2591572 | 0.0188247 | 0.80 | 0.50 | 11.303 | 5.201  | 6.00  | 8.00  | 10.00 | 14.00 | 18.00  | 3.165 | 12.050 | 5.563  | 6.00  | 8.00  | 11.00 | 15.00 | 19.00  |
| 0.10 | 2.989 | 0.2591572 | 0.0188247 | 0.70 | 0.50 | 7.946  | 2.735  | 5.00  | 6.00  | 7.00  | 9.00  | 12.00  | 3.165 | 8.424  | 2.971  | 5.00  | 6.00  | 8.00  | 10.00 | 12.00  |
| 0.10 | 2.989 | 0.2591572 | 0.0188247 | 0.60 | 0.50 | 5.788  | 1.653  | 4.00  | 5.00  | 6.00  | 7.00  | 8.00   | 3.165 | 6.084  | 1.709  | 4.00  | 5.00  | 6.00  | 7.00  | 8.00   |
| 0.10 | 2.989 | 0.2591572 | 0.0188247 | 0.50 | 0.50 | 4.448  | 1.051  | 3.00  | 4.00  | 4.00  | 5.00  | 6.00   | 3.165 | 4.632  | 1.090  | 3.00  | 4.00  | 4.00  | 5.00  | 6.00   |
| 0.15 | 3.1   |           |           |      |      |        |        |       |       |       |       |        |       |        |        |       |       |       |       |        |

|      |       |           |           |      |      |        |        |       |       |       |        |        |       |         |        |       |       |       |        |        |
|------|-------|-----------|-----------|------|------|--------|--------|-------|-------|-------|--------|--------|-------|---------|--------|-------|-------|-------|--------|--------|
| 0.15 | 3.117 | 0.3219652 | 0.0288123 | 0.90 | 1.10 | 83.075 | 74.191 | 16.00 | 30.00 | 60.00 | 113.00 | 181.00 | 3.290 | 101.667 | 93.637 | 19.00 | 36.00 | 72.00 | 137.00 | 223.00 |
| 0.15 | 3.117 | 0.3219652 | 0.0288123 | 0.80 | 1.10 | 18.048 | 11.439 | 7.00  | 10.00 | 15.00 | 23.00  | 33.00  | 3.290 | 19.596  | 12.740 | 8.00  | 11.00 | 16.00 | 25.00  | 36.00  |
| 0.15 | 3.117 | 0.3219652 | 0.0288123 | 0.70 | 1.10 | 8.540  | 3.854  | 5.00  | 6.00  | 8.00  | 10.00  | 14.00  | 3.290 | 9.081   | 4.100  | 5.00  | 6.00  | 8.00  | 11.00  | 14.00  |
| 0.15 | 3.117 | 0.3219652 | 0.0288123 | 0.60 | 1.10 | 5.471  | 1.870  | 3.00  | 4.00  | 5.00  | 6.00   | 8.00   | 3.290 | 5.722   | 1.951  | 4.00  | 4.00  | 5.00  | 7.00   | 8.00   |
| 0.15 | 3.117 | 0.3219652 | 0.0288123 | 0.50 | 1.10 | 4.034  | 1.096  | 3.00  | 3.00  | 4.00  | 5.00   | 5.00   | 3.290 | 4.195   | 1.123  | 3.00  | 3.00  | 4.00  | 5.00   | 6.00   |
| 0.15 | 3.117 | 0.3219652 | 0.0288123 | 1.10 | 1.20 | 67.257 | 58.497 | 14.00 | 25.00 | 50.00 | 91.00  | 147.00 | 3.290 | 80.539  | 73.851 | 15.00 | 29.00 | 59.00 | 108.00 | 174.00 |
| 0.15 | 3.117 | 0.3219652 | 0.0288123 | 1.20 | 1.20 | 20.131 | 14.295 | 7.00  | 10.00 | 16.00 | 26.00  | 39.00  | 3.290 | 21.816  | 15.674 | 7.00  | 11.00 | 17.00 | 28.00  | 42.00  |
| 0.15 | 3.117 | 0.3219652 | 0.0288123 | 1.30 | 1.20 | 10.488 | 5.867  | 5.00  | 6.00  | 9.00  | 13.00  | 18.00  | 3.290 | 11.132  | 6.231  | 5.00  | 7.00  | 10.00 | 14.00  | 19.00  |
| 0.15 | 3.117 | 0.3219652 | 0.0288123 | 1.40 | 1.20 | 6.980  | 3.152  | 4.00  | 5.00  | 6.00  | 9.00   | 11.00  | 3.290 | 7.288   | 3.348  | 4.00  | 5.00  | 7.00  | 9.00   | 12.00  |
| 0.15 | 3.117 | 0.3219652 | 0.0288123 | 0.90 | 1.20 | 80.786 | 71.441 | 16.00 | 30.00 | 59.00 | 109.00 | 175.00 | 3.290 | 100.330 | 91.768 | 19.00 | 35.00 | 72.00 | 136.00 | 220.00 |
| 0.15 | 3.117 | 0.3219652 | 0.0288123 | 0.80 | 1.20 | 18.163 | 11.637 | 7.00  | 10.00 | 15.00 | 23.00  | 33.00  | 3.290 | 19.895  | 12.909 | 8.00  | 11.00 | 16.00 | 25.00  | 37.00  |
| 0.15 | 3.117 | 0.3219652 | 0.0288123 | 0.70 | 1.20 | 8.537  | 3.892  | 5.00  | 6.00  | 8.00  | 10.00  | 14.00  | 3.290 | 9.050   | 4.056  | 5.00  | 6.00  | 8.00  | 11.00  | 14.00  |
| 0.15 | 3.117 | 0.3219652 | 0.0288123 | 0.60 | 1.20 | 5.500  | 1.881  | 4.00  | 4.00  | 5.00  | 6.00   | 8.00   | 3.290 | 5.757   | 1.965  | 4.00  | 4.00  | 5.00  | 7.00   | 8.00   |
| 0.15 | 3.117 | 0.3219652 | 0.0288123 | 0.50 | 1.20 | 4.041  | 1.106  | 3.00  | 3.00  | 4.00  | 5.00   | 5.00   | 3.290 | 4.196   | 1.146  | 3.00  | 3.00  | 4.00  | 5.00   | 6.00   |
| 0.15 | 3.117 | 0.3219652 | 0.0288123 | 1.10 | 1.30 | 64.292 | 57.241 | 13.00 | 24.00 | 47.00 | 86.00  | 138.00 | 3.290 | 76.773  | 68.322 | 15.00 | 28.00 | 55.00 | 104.00 | 169.00 |
| 0.15 | 3.117 | 0.3219652 | 0.0288123 | 1.20 | 1.30 | 19.984 | 13.897 | 7.00  | 10.00 | 16.00 | 26.00  | 39.00  | 3.290 | 21.715  | 15.213 | 7.00  | 11.00 | 18.00 | 28.00  | 42.00  |
| 0.15 | 3.117 | 0.3219652 | 0.0288123 | 1.30 | 1.30 | 10.360 | 5.789  | 5.00  | 6.00  | 9.00  | 13.00  | 18.00  | 3.290 | 11.049  | 6.229  | 5.00  | 7.00  | 10.00 | 14.00  | 19.00  |
| 0.15 | 3.117 | 0.3219652 | 0.0288123 | 1.40 | 1.30 | 6.947  | 3.154  | 4.00  | 5.00  | 6.00  | 8.00   | 11.00  | 3.290 | 7.294   | 3.268  | 4.00  | 5.00  | 7.00  | 9.00   | 12.00  |
| 0.15 | 3.117 | 0.3219652 | 0.0288123 | 0.90 | 1.30 | 77.595 | 69.525 | 16.00 | 29.00 | 56.00 | 104.00 | 166.00 | 3.290 | 95.680  | 86.016 | 19.00 | 35.00 | 70.00 | 131.00 | 206.00 |
| 0.15 | 3.117 | 0.3219652 | 0.0288123 | 0.80 | 1.30 | 18.063 | 11.437 | 7.00  | 10.00 | 15.00 | 23.00  | 33.00  | 3.290 | 19.722  | 12.466 | 8.00  | 11.00 | 16.00 | 25.00  | 37.00  |
| 0.15 | 3.117 | 0.3219652 | 0.0288123 | 0.70 | 1.30 | 8.538  | 3.766  | 5.00  | 6.00  | 8.00  | 10.00  | 14.00  | 3.290 | 9.066   | 4.079  | 5.00  | 6.00  | 8.00  | 11.00  | 14.00  |
| 0.15 | 3.117 | 0.3219652 | 0.0288123 | 0.60 | 1.30 | 5.490  | 1.869  | 4.00  | 4.00  | 5.00  | 6.00   | 8.00   | 3.290 | 5.735   | 1.963  | 4.00  | 4.00  | 5.00  | 7.00   | 8.00   |
| 0.15 | 3.117 | 0.3219652 | 0.0288123 | 0.50 | 1.30 | 4.038  | 1.089  | 3.00  | 3.00  | 4.00  | 5.00   | 5.00   | 3.290 | 4.223   | 1.158  | 3.00  | 3.00  | 4.00  | 5.00   | 6.00   |
| 0.15 | 3.117 | 0.3219652 | 0.0288123 | 1.10 | 1.40 | 60.072 | 51.999 | 13.00 | 23.00 | 44.00 | 81.00  | 128.00 | 3.290 | 72.699  | 65.063 | 15.00 | 27.00 | 53.00 | 97.00  | 156.00 |
| 0.15 | 3.117 | 0.3219652 | 0.0288123 | 1.20 | 1.40 | 19.719 | 13.674 | 7.00  | 10.00 | 16.00 | 25.00  | 38.00  | 3.290 | 21.740  | 15.178 | 7.00  | 11.00 | 18.00 | 28.00  | 42.00  |
| 0.15 | 3.117 | 0.3219652 | 0.0288123 | 1.30 | 1.40 | 10.389 | 5.757  | 5.00  | 6.00  | 9.00  | 13.00  | 18.00  | 3.290 | 11.155  | 6.154  | 5.00  | 7.00  | 10.00 | 14.00  | 19.00  |
| 0.15 | 3.117 | 0.3219652 | 0.0288123 | 1.40 | 1.40 | 6.948  | 3.128  | 4.00  | 5.00  | 6.00  | 9.00   | 11.00  | 3.290 | 7.248   | 3.270  | 4.00  | 5.00  | 7.00  | 9.00   | 12.00  |
| 0.15 | 3.117 | 0.3219652 | 0.0288123 | 0.90 | 1.40 | 71.116 | 63.365 | 16.00 | 27.00 | 51.00 | 95.00  | 152.00 | 3.290 | 89.490  | 78.776 | 18.00 | 33.00 | 66.00 | 121.00 | 191.00 |
| 0.15 | 3.117 | 0.3219652 | 0.0288123 | 0.80 | 1.40 | 17.984 | 11.420 | 7.00  | 10.00 | 15.00 | 23.00  | 33.00  | 3.290 | 19.622  | 12.536 | 8.00  | 11.00 | 16.00 | 25.00  | 36.00  |
| 0.15 | 3.117 | 0.3219652 | 0.0288123 | 0.70 | 1.40 | 8.522  | 3.820  | 5.00  | 6.00  | 8.00  | 10.00  | 14.00  | 3.290 | 9.087   | 4.049  | 5.00  | 6.00  | 8.00  | 11.00  | 14.00  |
| 0.15 | 3.117 | 0.3219652 | 0.0288123 | 0.60 | 1.40 | 5.481  | 1.880  | 4.00  | 4.00  | 5.00  | 6.00   | 8.00   | 3.290 | 5.803   | 2.001  | 4.00  | 4.00  | 5.00  | 7.00   | 8.00   |
| 0.15 | 3.117 | 0.3219652 | 0.0288123 | 0.50 | 1.40 | 4.024  | 1.088  | 3.00  | 3.00  | 4.00  | 5.00   | 5.00   | 3.290 | 4.186   | 1.128  | 3.00  | 3.00  | 4.00  | 5.00   | 6.00   |
| 0.15 | 3.117 | 0.3219652 | 0.0288123 | 1.10 | 0.90 | 60.091 | 53.462 | 12.00 | 22.00 | 44.00 | 80.00  | 130.00 | 3.290 | 71.050  | 63.361 | 14.00 | 26.00 | 52.00 | 97.00  | 152.00 |
| 0.15 | 3.117 | 0.3219652 | 0.0288123 | 1.20 | 0.90 | 19.802 | 13.757 | 7.00  | 10.00 | 16.00 | 26.00  | 38.00  | 3.290 | 21.685  | 15.532 | 7.00  | 11.00 | 17.00 | 28.00  | 42.00  |
| 0.15 | 3.117 | 0.3219652 | 0.0288123 | 1.30 | 0.90 | 10.375 | 5.705  | 5.00  | 6.00  | 9.00  | 13.00  | 18.00  | 3.290 | 10.941  | 6.054  | 5.00  | 7.00  | 10.00 | 14.00  | 19.00  |
| 0.15 | 3.117 | 0.3219652 | 0.0288123 | 1.40 | 0.90 | 6.920  | 3.147  | 4.00  | 5.00  | 6.00  | 8.00   | 11.00  | 3.290 | 7.317   | 3.354  | 4.00  | 5.00  | 7.00  | 9.00   | 12.00  |
| 0.15 | 3.117 | 0.3219652 | 0.0288123 | 0.90 | 0.90 | 70.739 | 62.190 | 15.00 | 26.00 | 52.00 | 95.00  | 151.00 | 3.290 | 86.699  | 78.071 | 17.00 | 32.00 | 63.00 | 117.00 | 188.00 |
| 0.15 | 3.117 | 0.3219652 | 0.0288123 | 0.80 | 0.90 | 17.985 | 11.451 | 7.00  | 10.00 | 15.00 | 23.00  | 33.00  | 3.290 | 19.763  | 12.825 | 8.00  | 11.00 | 16.00 | 25.00  | 36.00  |
| 0.15 | 3.117 | 0.3219652 | 0.0288123 | 0.70 | 0.90 | 8.455  | 3.803  | 5.00  | 6.00  | 8.00  | 10.00  | 13.00  | 3.290 | 9.082   | 4.137  | 5.00  | 6.00  | 8.00  | 11.00  | 14.00  |
| 0.15 | 3.117 | 0.3219652 | 0.0288123 | 0.60 | 0.90 | 5.483  | 1.863  | 4.00  | 4.00  | 5.00  | 6.00   | 8.00   | 3.290 | 5.742   | 1.990  | 4.00  | 4.00  | 5.00  | 7.00   | 8.00   |
| 0.15 | 3.117 | 0.3219652 | 0.0288123 | 0.50 | 0.90 | 4.038  | 1.098  | 3.00  | 3.00  | 4.00  | 5.00   | 5.00   | 3.290 | 4.192   | 1.122  | 3.00  | 3.00  | 4.00  | 5.00   | 6.00   |
| 0.15 | 3.117 | 0.3219652 | 0.0288123 | 1.10 | 0.80 | 47.997 | 41.555 | 11.00 | 19.00 | 35.00 | 64.00  | 101.00 | 3.290 | 56.220  | 48.215 | 12.00 | 22.00 | 42.00 | 76.00  | 120.00 |
| 0.15 | 3.117 | 0.3219652 | 0.0288123 | 1.20 | 0.80 | 18.667 | 12.903 | 7.00  | 10.00 | 15.00 | 24.00  | 35.00  | 3.290 | 20.339  | 14.143 | 7.00  | 10.00 | 17.00 | 26.00  | 39.00  |
| 0.15 | 3.117 | 0.3219652 | 0.0288123 | 1.30 | 0.80 | 10.207 | 5.660  | 5.00  | 6.00  | 9.00  | 13.00  | 18.00  | 3.290 | 10.909  | 5.988  | 5.00  | 7.00  | 10.00 | 14.00  | 19.00  |
| 0.15 | 3.117 | 0.3219652 | 0.0288123 | 1.40 | 0.80 | 6.877  | 3.059  | 4.00  | 5.00  | 6.00  | 8.00   | 11.00  | 3.290 | 7.286   | 3.245  | 4.00  | 5.00  | 7.00  | 9.00   | 12.00  |
| 0.15 | 3.117 | 0.3219652 | 0.0288123 | 0.90 | 0.80 | 53.687 | 46.171 | 12.00 | 21.00 | 40.00 | 72.00  | 113.00 | 3.290 | 64.449  | 57.648 | 14.00 | 25.00 | 47.00 | 85.00  | 138.00 |
| 0.15 | 3.117 | 0.3219652 | 0.0288123 | 0.80 | 0.80 | 17.117 | 10.592 | 7.00  | 10.00 | 14.00 | 22.00  | 31.00  | 3.290 | 18.839  | 11.926 | 8.00  | 10.00 | 16.00 | 24.00  | 34.00  |
| 0.15 | 3.117 | 0.3219652 | 0.0288123 | 0.70 | 0.80 | 8.459  | 3.743  | 5.00  | 6.00  | 8.00  | 10.00  | 13.00  | 3.290 | 8.958   | 3.967  | 5.00  | 6.00  | 8.00  | 11.00  | 14.00  |
| 0.15 | 3.117 | 0.3219652 | 0.0288123 | 0.60 | 0.80 | 5.482  | 1.843  | 4.00  | 4.00  | 5.00  | 6.00   | 8.00   | 3.290 | 5.722   | 1.938  | 4.00  | 4.00  | 5.00  | 7.00   | 8.00   |
| 0.15 | 3.117 | 0.3219652 | 0.0288123 | 0.50 | 0.80 | 4.035  | 1.082  | 3.00  | 3.00  | 4.00  | 5.00   | 5.00   | 3.290 | 4.179   | 1.120  | 3.00  | 3.00  | 4.00  | 5.00   | 6.00   |
| 0.15 | 3.117 | 0.3219652 | 0.0288123 | 1.10 | 0.70 | 31.993 | 25.413 | 9.00  | 14.00 | 25.00 | 42.00  | 65.00  | 3.290 | 37.449  | 30.374 | 9.00  | 16.00 | 28.00 | 49.00  | 78.00  |
| 0.15 | 3.117 | 0.3219652 | 0.0288123 | 1.20 | 0.70 | 16.846 | 10.934 | 6.00  | 9.00  | 14.00 | 22.00  | 31.00  | 3.290 | 18.426  | 12.484 | 7.00  | 10.00 | 15.00 | 24.00  | 34.00  |
| 0.15 | 3.117 | 0.3219652 | 0.0288123 | 1.30 | 0.70 | 9.865  | 5.191  | 5.00  | 6.00  | 9.00  | 12.00  | 17.00  | 3.290 | 10.528  | 5.652  | 5.00  | 6.00  | 9.00  | 13.00  | 18.00  |
| 0.15 | 3.117 | 0.3219652 | 0.0288123 | 1.40 | 0.70 | 6.852  | 3.033  | 4.00  | 5.00  | 6.00  | 8.00   | 11.00  | 3.290 | 7.226   | 3.217  | 4.00  | 5.00  | 7.00  | 9.00   | 11.00  |
| 0.15 | 3.117 | 0.3219652 | 0.0288123 | 0.90 | 0.70 | 34.544 | 27.884 | 9.00  | 15.00 | 26.00 | 45.00  | 71.00  | 3.290 | 40.352  | 32.725 | 10.00 | 17.00 | 31.00 | 53.25  | 83.00  |
| 0.15 | 3.117 | 0.3219652 | 0.0288123 | 0.80 | 0.70 | 15.676 | 9.489  | 6.00  | 9.00  | 13.00 | 20.00  | 28.00  | 3.290 | 17.203  | 10.525 | 7.00  | 10.00 | 14.00 | 22.00  | 31.00  |
| 0.15 | 3.117 | 0.3219652 | 0.0288123 | 0.70 | 0.70 | 8.355  | 3.698  | 5.00  | 6.00  | 8.00  | 10.00  | 13.00  | 3.290 |         |        |       |       |       |        |        |

|                              |       |           |           |      |      |         |         |       |        |        |        |        |                              |         |         |       |        |        |        |         |  |  |
|------------------------------|-------|-----------|-----------|------|------|---------|---------|-------|--------|--------|--------|--------|------------------------------|---------|---------|-------|--------|--------|--------|---------|--|--|
| 0.15                         | 3.117 | 0.3219652 | 0.0288123 | 1.40 | 0.60 | 6.654   | 2.872   | 4.00  | 5.00   | 6.00   | 8.00   | 10.00  | 3.290                        | 6.983   | 3.017   | 4.00  | 5.00   | 6.00   | 8.00   | 11.00   |  |  |
| 0.15                         | 3.117 | 0.3219652 | 0.0288123 | 0.90 | 0.60 | 21.838  | 15.797  | 7.00  | 11.00  | 17.00  | 28.00  | 43.00  | 3.290                        | 24.742  | 18.196  | 8.00  | 12.00  | 19.00  | 32.00  | 49.00   |  |  |
| 0.15                         | 3.117 | 0.3219652 | 0.0288123 | 0.80 | 0.60 | 13.546  | 7.807   | 6.00  | 8.00   | 12.00  | 17.00  | 24.00  | 3.290                        | 14.680  | 8.550   | 6.00  | 9.00   | 13.00  | 18.00  | 26.00   |  |  |
| 0.15                         | 3.117 | 0.3219652 | 0.0288123 | 0.70 | 0.60 | 8.062   | 3.436   | 4.00  | 6.00   | 7.00   | 10.00  | 13.00  | 3.290                        | 8.438   | 3.624   | 5.00  | 6.00   | 8.00   | 10.00  | 13.00   |  |  |
| 0.15                         | 3.117 | 0.3219652 | 0.0288123 | 0.60 | 0.60 | 5.410   | 1.799   | 3.00  | 4.00   | 5.00   | 6.00   | 8.00   | 3.290                        | 5.647   | 1.872   | 4.00  | 4.00   | 5.00   | 7.00   | 8.00    |  |  |
| 0.15                         | 3.117 | 0.3219652 | 0.0288123 | 0.50 | 0.60 | 4.034   | 1.088   | 3.00  | 3.00   | 4.00   | 5.00   | 5.00   | 3.290                        | 4.176   | 1.128   | 3.00  | 3.00   | 4.00   | 5.00   | 6.00    |  |  |
| 0.15                         | 3.117 | 0.3219652 | 0.0288123 | 1.10 | 0.50 | 13.901  | 8.939   | 5.00  | 8.00   | 11.00  | 18.00  | 26.00  | 3.290                        | 15.186  | 10.058  | 6.00  | 8.00   | 12.00  | 20.00  | 28.00   |  |  |
| 0.15                         | 3.117 | 0.3219652 | 0.0288123 | 1.20 | 0.50 | 11.092  | 6.287   | 5.00  | 7.00   | 10.00  | 14.00  | 19.00  | 3.290                        | 12.002  | 6.897   | 5.00  | 7.00   | 10.00  | 15.00  | 21.00   |  |  |
| 0.15                         | 3.117 | 0.3219652 | 0.0288123 | 1.30 | 0.50 | 8.354   | 3.994   | 4.00  | 5.00   | 7.50   | 10.00  | 14.00  | 3.290                        | 8.921   | 4.263   | 5.00  | 6.00   | 8.00   | 11.00  | 14.00   |  |  |
| 0.15                         | 3.117 | 0.3219652 | 0.0288123 | 1.40 | 0.50 | 6.374   | 2.672   | 4.00  | 4.00   | 6.00   | 8.00   | 10.00  | 3.290                        | 6.690   | 2.791   | 4.00  | 5.00   | 6.00   | 8.00   | 10.00   |  |  |
| 0.15                         | 3.117 | 0.3219652 | 0.0288123 | 0.90 | 0.50 | 14.084  | 9.058   | 5.00  | 8.00   | 12.00  | 18.00  | 26.00  | 3.290                        | 15.446  | 9.939   | 6.00  | 8.00   | 13.00  | 20.00  | 28.00   |  |  |
| 0.15                         | 3.117 | 0.3219652 | 0.0288123 | 0.80 | 0.50 | 10.989  | 5.876   | 5.00  | 7.00   | 10.00  | 14.00  | 19.00  | 3.290                        | 11.781  | 6.406   | 5.00  | 7.00   | 10.00  | 15.00  | 20.00   |  |  |
| 0.15                         | 3.117 | 0.3219652 | 0.0288123 | 0.70 | 0.50 | 7.467   | 3.085   | 4.00  | 5.00   | 7.00   | 9.00   | 12.00  | 3.290                        | 7.933   | 3.272   | 4.00  | 6.00   | 7.00   | 9.00   | 12.00   |  |  |
| 0.15                         | 3.117 | 0.3219652 | 0.0288123 | 0.60 | 0.50 | 5.303   | 1.722   | 3.00  | 4.00   | 5.00   | 6.00   | 8.00   | 3.290                        | 5.543   | 1.805   | 4.00  | 4.00   | 5.00   | 6.00   | 8.00    |  |  |
| 0.15                         | 3.117 | 0.3219652 | 0.0288123 | 0.50 | 0.50 | 4.010   | 1.055   | 3.00  | 3.00   | 4.00   | 5.00   | 5.00   | 3.290                        | 4.161   | 1.098   | 3.00  | 3.00   | 4.00   | 5.00   | 6.00    |  |  |
| <b>ARL<sub>0</sub> = 370</b> |       |           |           |      |      |         |         |       |        |        |        |        | <b>ARL<sub>0</sub> = 500</b> |         |         |       |        |        |        |         |  |  |
| <b>Case 4</b>                |       |           |           |      |      |         |         |       |        |        |        |        |                              |         |         |       |        |        |        |         |  |  |
| <b><math>\phi=31</math></b>  |       |           |           |      |      |         |         |       |        |        |        |        |                              |         |         |       |        |        |        |         |  |  |
| 0.05                         | 2.704 | 0.1807397 | 0.0092360 | 1.00 | 1.00 | 370.431 | 354.684 | 54.00 | 118.00 | 261.00 | 511.00 | 821.10 | 2.898                        | 500.250 | 473.620 | 68.00 | 158.00 | 352.00 | 690.00 | 1129.10 |  |  |
| 0.05                         | 2.704 | 0.1807397 | 0.0092360 | 1.10 | 1.10 | 98.162  | 80.724  | 25.00 | 42.00  | 74.50  | 130.00 | 201.00 | 2.898                        | 114.645 | 97.605  | 27.00 | 46.00  | 85.00  | 153.00 | 241.00  |  |  |
| 0.05                         | 2.704 | 0.1807397 | 0.0092360 | 1.20 | 1.10 | 37.805  | 23.900  | 14.00 | 21.00  | 32.00  | 48.00  | 69.00  | 2.898                        | 41.607  | 27.007  | 16.00 | 23.00  | 34.00  | 53.00  | 78.00   |  |  |
| 0.05                         | 2.704 | 0.1807397 | 0.0092360 | 1.30 | 1.10 | 21.892  | 11.158  | 10.00 | 14.00  | 19.00  | 27.00  | 37.00  | 2.898                        | 23.183  | 11.746  | 11.00 | 15.00  | 21.00  | 29.00  | 39.00   |  |  |
| 0.05                         | 2.704 | 0.1807397 | 0.0092360 | 1.40 | 1.10 | 15.259  | 6.702   | 8.00  | 11.00  | 14.00  | 19.00  | 24.00  | 2.898                        | 16.093  | 6.906   | 9.00  | 11.00  | 15.00  | 20.00  | 25.00   |  |  |
| 0.05                         | 2.704 | 0.1807397 | 0.0092360 | 0.90 | 1.10 | 104.570 | 83.559  | 28.00 | 45.00  | 80.50  | 137.00 | 215.00 | 2.898                        | 122.646 | 99.865  | 32.00 | 52.00  | 94.00  | 162.00 | 252.00  |  |  |
| 0.05                         | 2.704 | 0.1807397 | 0.0092360 | 0.80 | 1.10 | 34.200  | 19.192  | 15.00 | 21.00  | 30.00  | 43.00  | 59.00  | 2.898                        | 37.271  | 21.400  | 17.00 | 22.00  | 32.00  | 46.00  | 65.00   |  |  |
| 0.05                         | 2.704 | 0.1807397 | 0.0092360 | 0.70 | 1.10 | 18.332  | 7.748   | 10.00 | 13.00  | 17.00  | 22.00  | 28.00  | 2.898                        | 19.471  | 8.120   | 11.00 | 14.00  | 18.00  | 23.00  | 30.00   |  |  |
| 0.05                         | 2.704 | 0.1807397 | 0.0092360 | 0.60 | 1.10 | 12.264  | 4.003   | 8.00  | 9.00   | 12.00  | 14.00  | 17.00  | 2.898                        | 12.862  | 4.163   | 8.00  | 10.00  | 12.00  | 15.00  | 18.00   |  |  |
| 0.05                         | 2.704 | 0.1807397 | 0.0092360 | 0.50 | 1.10 | 9.083   | 2.423   | 6.00  | 7.00   | 9.00   | 10.00  | 12.00  | 2.898                        | 9.550   | 2.492   | 7.00  | 8.00   | 9.00   | 11.00  | 13.00   |  |  |
| 0.05                         | 2.704 | 0.1807397 | 0.0092360 | 1.10 | 1.20 | 83.046  | 66.141  | 24.00 | 37.00  | 64.00  | 109.00 | 168.00 | 2.898                        | 97.362  | 76.819  | 27.00 | 43.00  | 76.00  | 127.00 | 198.00  |  |  |
| 0.05                         | 2.704 | 0.1807397 | 0.0092360 | 1.20 | 1.20 | 36.793  | 22.642  | 14.00 | 21.00  | 31.00  | 47.00  | 66.00  | 2.898                        | 40.471  | 25.141  | 16.00 | 23.00  | 34.00  | 51.00  | 73.00   |  |  |
| 0.05                         | 2.704 | 0.1807397 | 0.0092360 | 1.30 | 1.20 | 21.527  | 10.738  | 10.00 | 14.00  | 19.00  | 27.00  | 36.00  | 2.898                        | 23.194  | 11.791  | 11.00 | 15.00  | 21.00  | 29.00  | 39.00   |  |  |
| 0.05                         | 2.704 | 0.1807397 | 0.0092360 | 1.40 | 1.20 | 15.264  | 6.553   | 8.00  | 11.00  | 14.00  | 19.00  | 24.00  | 2.898                        | 16.196  | 6.965   | 9.00  | 11.00  | 15.00  | 20.00  | 25.00   |  |  |
| 0.05                         | 2.704 | 0.1807397 | 0.0092360 | 0.90 | 1.20 | 89.450  | 68.695  | 27.00 | 42.00  | 70.00  | 116.00 | 177.00 | 2.898                        | 105.168 | 84.024  | 30.00 | 47.00  | 81.00  | 137.00 | 213.00  |  |  |
| 0.05                         | 2.704 | 0.1807397 | 0.0092360 | 0.80 | 1.20 | 33.525  | 18.718  | 15.00 | 20.00  | 29.00  | 42.00  | 58.00  | 2.898                        | 36.574  | 20.137  | 16.00 | 22.00  | 32.00  | 46.00  | 63.00   |  |  |
| 0.05                         | 2.704 | 0.1807397 | 0.0092360 | 0.70 | 1.20 | 18.339  | 7.690   | 10.00 | 13.00  | 17.00  | 22.00  | 28.00  | 2.898                        | 19.528  | 8.080   | 11.00 | 14.00  | 18.00  | 23.00  | 30.00   |  |  |
| 0.05                         | 2.704 | 0.1807397 | 0.0092360 | 0.60 | 1.20 | 12.231  | 3.991   | 8.00  | 9.00   | 11.00  | 14.00  | 17.00  | 2.898                        | 12.925  | 4.141   | 8.00  | 10.00  | 12.00  | 15.00  | 19.00   |  |  |
| 0.05                         | 2.704 | 0.1807397 | 0.0092360 | 0.50 | 1.20 | 9.068   | 2.407   | 6.00  | 7.00   | 9.00   | 10.00  | 12.00  | 2.898                        | 9.540   | 2.534   | 7.00  | 8.00   | 9.00   | 11.00  | 13.00   |  |  |
| 0.05                         | 2.704 | 0.1807397 | 0.0092360 | 1.10 | 1.30 | 66.061  | 47.278  | 22.00 | 33.00  | 53.00  | 84.00  | 128.00 | 2.898                        | 76.818  | 57.106  | 24.00 | 37.00  | 61.00  | 100.00 | 150.00  |  |  |
| 0.05                         | 2.704 | 0.1807397 | 0.0092360 | 1.20 | 1.30 | 34.873  | 20.831  | 14.00 | 20.00  | 30.00  | 44.00  | 63.00  | 2.898                        | 38.374  | 23.466  | 15.00 | 22.00  | 33.00  | 48.00  | 69.00   |  |  |
| 0.05                         | 2.704 | 0.1807397 | 0.0092360 | 1.30 | 1.30 | 21.180  | 10.432  | 10.00 | 14.00  | 19.00  | 26.00  | 35.00  | 2.898                        | 22.903  | 11.392  | 11.00 | 15.00  | 20.00  | 29.00  | 38.00   |  |  |
| 0.05                         | 2.704 | 0.1807397 | 0.0092360 | 1.40 | 1.30 | 15.152  | 6.423   | 8.00  | 11.00  | 14.00  | 19.00  | 24.00  | 2.898                        | 15.981  | 6.799   | 9.00  | 11.00  | 15.00  | 20.00  | 25.00   |  |  |
| 0.05                         | 2.704 | 0.1807397 | 0.0092360 | 0.90 | 1.30 | 69.653  | 49.034  | 24.00 | 35.00  | 57.00  | 88.00  | 133.00 | 2.898                        | 81.845  | 59.885  | 26.00 | 40.00  | 64.00  | 106.00 | 160.00  |  |  |
| 0.05                         | 2.704 | 0.1807397 | 0.0092360 | 0.80 | 1.30 | 32.163  | 17.097  | 15.00 | 20.00  | 28.00  | 40.00  | 54.00  | 2.898                        | 35.456  | 19.076  | 16.00 | 22.00  | 31.00  | 44.00  | 61.00   |  |  |
| 0.05                         | 2.704 | 0.1807397 | 0.0092360 | 0.70 | 1.30 | 18.137  | 7.396   | 10.00 | 13.00  | 17.00  | 22.00  | 28.00  | 2.898                        | 19.412  | 8.022   | 11.00 | 14.00  | 18.00  | 23.00  | 30.00   |  |  |
| 0.05                         | 2.704 | 0.1807397 | 0.0092360 | 0.60 | 1.30 | 12.210  | 3.938   | 8.00  | 9.00   | 12.00  | 14.00  | 17.00  | 2.898                        | 12.940  | 4.244   | 8.00  | 10.00  | 12.00  | 15.00  | 19.00   |  |  |
| 0.05                         | 2.704 | 0.1807397 | 0.0092360 | 0.50 | 1.30 | 9.056   | 2.402   | 6.00  | 7.00   | 9.00   | 10.00  | 12.00  | 2.898                        | 9.541   | 2.490   | 7.00  | 8.00   | 9.00   | 11.00  | 13.00   |  |  |
| 0.05                         | 2.704 | 0.1807397 | 0.0092360 | 1.10 | 1.40 | 53.716  | 35.028  | 20.00 | 29.00  | 44.50  | 69.00  | 99.00  | 2.898                        | 60.623  | 40.176  | 22.00 | 32.00  | 50.00  | 78.00  | 114.00  |  |  |
| 0.05                         | 2.704 | 0.1807397 | 0.0092360 | 1.20 | 1.40 | 32.362  | 18.104  | 14.00 | 20.00  | 28.00  | 40.25  | 56.00  | 2.898                        | 35.600  | 20.331  | 15.00 | 21.00  | 31.00  | 45.00  | 62.00   |  |  |
| 0.05                         | 2.704 | 0.1807397 | 0.0092360 | 1.30 | 1.40 | 21.111  | 10.064  | 10.00 | 14.00  | 19.00  | 26.00  | 34.00  | 2.898                        | 22.428  | 10.869  | 11.00 | 15.00  | 20.00  | 28.00  | 37.00   |  |  |
| 0.05                         | 2.704 | 0.1807397 | 0.0092360 | 1.40 | 1.40 | 15.084  | 6.318   | 8.00  | 11.00  | 14.00  | 18.00  | 23.00  | 2.898                        | 15.954  | 6.838   | 9.00  | 11.00  | 15.00  | 19.00  | 25.00   |  |  |
| 0.05                         | 2.704 | 0.1807397 | 0.0092360 | 0.90 | 1.40 | 54.967  | 34.779  | 21.00 | 31.00  | 46.00  | 69.00  | 100.10 | 2.898                        | 63.601  | 41.782  | 24.00 | 34.00  | 52.00  | 81.00  | 117.00  |  |  |
| 0.05                         | 2.704 | 0.1807397 | 0.0092360 | 0.80 | 1.40 | 30.421  | 15.369  | 15.00 | 19.00  | 27.00  | 38.00  | 50.00  | 2.898                        | 33.239  | 17.066  | 16.00 | 21.00  | 29.00  | 41.00  | 55.00   |  |  |
| 0.05                         | 2.704 | 0.1807397 | 0.0092360 | 0.70 | 1.40 | 17.985  | 7.103   | 10.00 | 13.00  | 17.00  | 22.00  | 27.00  | 2.898                        | 19.231  | 7.677   | 11.00 | 14.00  | 18.00  | 23.00  | 29.00   |  |  |
| 0.05                         | 2.704 | 0.1807397 | 0.0092360 | 0.60 | 1.40 | 12.257  | 3.969   | 8.00  | 9.00   | 12.00  | 14.00  | 17.00  | 2.898                        | 12.867  | 4.197   | 8.00  | 10.00  | 12.00  | 15.00  | 18.00   |  |  |
| 0.05                         | 2.704 | 0.1807397 | 0.0092360 | 0.50 | 1.40 | 9.096   | 2.420   | 6.00  | 7.00   | 9.00   | 10.00  | 12.00  | 2.898                        | 9.510   | 2.526   | 7.00  | 8.00   | 9.00   | 11.00  | 13.00   |  |  |
| 0.05                         | 2.704 | 0.1807397 | 0.0092360 | 1.10 | 0.90 | 85.269  | 68.001  | 23.00 | 37.00  | 65.00  | 113.00 | 174.00 | 2.898                        | 100.611 | 83.849  | 25.00 | 42.00  | 75.00  | 133.00 | 211.00  |  |  |
| 0.05                         | 2.704 | 0.1807397 | 0.0092360 | 1.20 | 0.90 | 36.334  | 22.853  | 14.00 | 20.00  | 31.00  | 46.00  | 66.00  | 2.898                        | 40.040  | 25.838  | 15.00 | 22.00  | 33.00  | 51.00  | 73.00   |  |  |
| 0.05                         | 2.704 | 0.1807397 |           |      |      |         |         |       |        |        |        |        |                              |         |         |       |        |        |        |         |  |  |

|      |       |           |           |      |      |         |         |       |        |        |        |        |       |         |         |       |        |        |        |         |
|------|-------|-----------|-----------|------|------|---------|---------|-------|--------|--------|--------|--------|-------|---------|---------|-------|--------|--------|--------|---------|
| 0.05 | 2.704 | 0.1807397 | 0.0092360 | 0.60 | 0.90 | 12.159  | 3.980   | 8.00  | 9.00   | 11.00  | 14.00  | 17.00  | 2.898 | 12.932  | 4.201   | 8.00  | 10.00  | 12.00  | 15.00  | 18.00   |
| 0.05 | 2.704 | 0.1807397 | 0.0092360 | 0.50 | 0.90 | 9.087   | 2.413   | 6.00  | 7.00   | 9.00   | 10.00  | 12.00  | 2.898 | 9.561   | 2.512   | 7.00  | 8.00   | 9.00   | 11.00  | 13.00   |
| 0.05 | 2.704 | 0.1807397 | 0.0092360 | 1.10 | 0.80 | 58.439  | 43.668  | 18.00 | 27.00  | 46.00  | 76.00  | 116.00 | 2.898 | 66.047  | 48.943  | 20.00 | 31.00  | 52.00  | 86.00  | 130.10  |
| 0.05 | 2.704 | 0.1807397 | 0.0092360 | 1.20 | 0.80 | 32.688  | 19.774  | 13.00 | 19.00  | 28.00  | 41.00  | 58.00  | 2.898 | 35.501  | 21.457  | 14.00 | 20.00  | 30.00  | 45.00  | 64.00   |
| 0.05 | 2.704 | 0.1807397 | 0.0092360 | 1.30 | 0.80 | 20.905  | 10.442  | 10.00 | 14.00  | 19.00  | 26.00  | 34.00  | 2.898 | 22.198  | 11.050  | 11.00 | 14.00  | 20.00  | 28.00  | 37.00   |
| 0.05 | 2.704 | 0.1807397 | 0.0092360 | 1.40 | 0.80 | 14.921  | 6.321   | 8.00  | 10.00  | 14.00  | 18.00  | 23.00  | 2.898 | 15.897  | 6.642   | 9.00  | 11.00  | 15.00  | 19.00  | 25.00   |
| 0.05 | 2.704 | 0.1807397 | 0.0092360 | 0.90 | 0.80 | 61.579  | 45.586  | 19.00 | 30.00  | 49.00  | 79.00  | 120.00 | 2.898 | 69.329  | 51.542  | 21.00 | 33.00  | 55.00  | 90.00  | 138.00  |
| 0.05 | 2.704 | 0.1807397 | 0.0092360 | 0.80 | 0.80 | 30.748  | 16.706  | 14.00 | 19.00  | 27.00  | 38.00  | 52.00  | 2.898 | 33.379  | 18.503  | 15.00 | 20.00  | 29.00  | 41.00  | 57.00   |
| 0.05 | 2.704 | 0.1807397 | 0.0092360 | 0.70 | 0.80 | 17.838  | 7.355   | 10.00 | 13.00  | 16.00  | 21.00  | 27.00  | 2.898 | 18.951  | 7.668   | 11.00 | 13.00  | 17.00  | 23.00  | 29.00   |
| 0.05 | 2.704 | 0.1807397 | 0.0092360 | 0.60 | 0.80 | 12.104  | 3.905   | 8.00  | 9.00   | 11.00  | 14.00  | 17.00  | 2.898 | 12.802  | 4.077   | 8.00  | 10.00  | 12.00  | 15.00  | 18.00   |
| 0.05 | 2.704 | 0.1807397 | 0.0092360 | 0.50 | 0.80 | 9.038   | 2.410   | 6.00  | 7.00   | 9.00   | 10.00  | 12.00  | 2.898 | 9.495   | 2.469   | 7.00  | 8.00   | 9.00   | 11.00  | 13.00   |
| 0.05 | 2.704 | 0.1807397 | 0.0092360 | 1.10 | 0.70 | 36.771  | 23.662  | 14.00 | 20.00  | 31.00  | 47.00  | 68.00  | 2.898 | 40.276  | 26.396  | 15.00 | 22.00  | 33.00  | 51.00  | 75.00   |
| 0.05 | 2.704 | 0.1807397 | 0.0092360 | 1.20 | 0.70 | 26.738  | 14.858  | 12.00 | 16.00  | 23.00  | 33.00  | 46.00  | 2.898 | 29.047  | 16.092  | 13.00 | 18.00  | 26.00  | 36.00  | 50.00   |
| 0.05 | 2.704 | 0.1807397 | 0.0092360 | 1.30 | 0.70 | 19.155  | 9.039   | 10.00 | 13.00  | 17.00  | 24.00  | 31.00  | 2.898 | 20.559  | 9.705   | 10.00 | 14.00  | 19.00  | 25.00  | 33.00   |
| 0.05 | 2.704 | 0.1807397 | 0.0092360 | 1.40 | 0.70 | 14.347  | 5.916   | 8.00  | 10.00  | 13.00  | 17.00  | 22.00  | 2.898 | 15.444  | 6.387   | 8.00  | 11.00  | 14.00  | 19.00  | 24.00   |
| 0.05 | 2.704 | 0.1807397 | 0.0092360 | 0.90 | 0.70 | 37.978  | 24.422  | 14.00 | 21.00  | 32.00  | 48.00  | 70.00  | 2.898 | 41.741  | 26.928  | 16.00 | 23.00  | 35.00  | 53.00  | 77.00   |
| 0.05 | 2.704 | 0.1807397 | 0.0092360 | 0.80 | 0.70 | 25.976  | 13.197  | 12.00 | 17.00  | 23.00  | 32.00  | 43.00  | 2.898 | 28.310  | 14.397  | 14.00 | 18.00  | 25.00  | 35.00  | 47.00   |
| 0.05 | 2.704 | 0.1807397 | 0.0092360 | 0.70 | 0.70 | 16.819  | 6.494   | 10.00 | 12.00  | 16.00  | 20.00  | 25.00  | 2.898 | 18.068  | 7.022   | 11.00 | 13.00  | 17.00  | 22.00  | 27.00   |
| 0.05 | 2.704 | 0.1807397 | 0.0092360 | 0.60 | 0.70 | 11.927  | 3.819   | 8.00  | 9.00   | 11.00  | 14.00  | 17.00  | 2.898 | 12.667  | 4.016   | 8.00  | 10.00  | 12.00  | 15.00  | 18.00   |
| 0.05 | 2.704 | 0.1807397 | 0.0092360 | 0.50 | 0.70 | 8.980   | 2.346   | 6.00  | 7.00   | 9.00   | 10.00  | 12.00  | 2.898 | 9.472   | 2.486   | 7.00  | 8.00   | 9.00   | 11.00  | 13.00   |
| 0.05 | 2.704 | 0.1807397 | 0.0092360 | 1.10 | 0.60 | 23.987  | 13.424  | 10.00 | 14.00  | 21.00  | 30.00  | 42.00  | 2.898 | 25.966  | 14.720  | 11.00 | 15.00  | 22.00  | 33.00  | 45.00   |
| 0.05 | 2.704 | 0.1807397 | 0.0092360 | 1.20 | 0.60 | 20.510  | 10.255  | 10.00 | 13.00  | 18.00  | 26.00  | 34.00  | 2.898 | 22.139  | 11.050  | 11.00 | 14.00  | 20.00  | 28.00  | 37.00   |
| 0.05 | 2.704 | 0.1807397 | 0.0092360 | 1.30 | 0.60 | 16.879  | 7.509   | 9.00  | 11.00  | 15.00  | 21.00  | 27.00  | 2.898 | 17.934  | 7.808   | 9.00  | 12.00  | 16.00  | 22.00  | 28.00   |
| 0.05 | 2.704 | 0.1807397 | 0.0092360 | 1.40 | 0.60 | 13.456  | 5.244   | 8.00  | 10.00  | 13.00  | 16.00  | 20.00  | 2.898 | 14.235  | 5.531   | 8.00  | 10.00  | 13.00  | 17.00  | 22.00   |
| 0.05 | 2.704 | 0.1807397 | 0.0092360 | 0.90 | 0.60 | 24.478  | 13.780  | 11.00 | 15.00  | 21.00  | 31.00  | 42.00  | 2.898 | 26.572  | 15.113  | 11.00 | 16.00  | 23.00  | 34.00  | 46.10   |
| 0.05 | 2.704 | 0.1807397 | 0.0092360 | 0.80 | 0.60 | 20.511  | 9.721   | 10.00 | 14.00  | 19.00  | 25.00  | 33.00  | 2.898 | 22.160  | 10.433  | 11.00 | 15.00  | 20.00  | 27.00  | 36.00   |
| 0.05 | 2.704 | 0.1807397 | 0.0092360 | 0.70 | 0.60 | 15.413  | 5.773   | 9.00  | 11.00  | 14.00  | 18.00  | 23.00  | 2.898 | 16.597  | 6.379   | 10.00 | 12.00  | 15.00  | 20.00  | 25.00   |
| 0.05 | 2.704 | 0.1807397 | 0.0092360 | 0.60 | 0.60 | 11.475  | 3.539   | 8.00  | 9.00   | 11.00  | 13.00  | 16.00  | 2.898 | 12.201  | 3.708   | 8.00  | 10.00  | 12.00  | 14.00  | 17.00   |
| 0.05 | 2.704 | 0.1807397 | 0.0092360 | 0.50 | 0.60 | 8.901   | 2.266   | 6.00  | 7.00   | 9.00   | 10.00  | 12.00  | 2.898 | 9.360   | 2.350   | 7.00  | 8.00   | 9.00   | 11.00  | 12.00   |
| 0.05 | 2.704 | 0.1807397 | 0.0092360 | 1.10 | 0.50 | 16.449  | 8.114   | 8.00  | 11.00  | 15.00  | 20.00  | 27.00  | 2.898 | 17.451  | 8.648   | 9.00  | 11.00  | 16.00  | 22.00  | 29.00   |
| 0.05 | 2.704 | 0.1807397 | 0.0092360 | 1.20 | 0.50 | 15.473  | 7.235   | 8.00  | 10.00  | 14.00  | 19.00  | 25.00  | 2.898 | 16.548  | 7.627   | 8.00  | 11.00  | 15.00  | 20.00  | 27.00   |
| 0.05 | 2.704 | 0.1807397 | 0.0092360 | 1.30 | 0.50 | 13.820  | 5.785   | 8.00  | 10.00  | 13.00  | 17.00  | 22.00  | 2.898 | 14.780  | 6.118   | 8.00  | 10.00  | 14.00  | 18.00  | 23.00   |
| 0.05 | 2.704 | 0.1807397 | 0.0092360 | 1.40 | 0.50 | 11.983  | 4.461   | 7.00  | 9.00   | 11.00  | 14.00  | 18.00  | 2.898 | 12.694  | 4.690   | 7.00  | 9.00   | 12.00  | 15.00  | 19.00   |
| 0.05 | 2.704 | 0.1807397 | 0.0092360 | 0.90 | 0.50 | 16.490  | 8.153   | 8.00  | 11.00  | 15.00  | 20.00  | 27.00  | 2.898 | 17.617  | 8.706   | 9.00  | 11.00  | 16.00  | 22.00  | 29.00   |
| 0.05 | 2.704 | 0.1807397 | 0.0092360 | 0.80 | 0.50 | 15.509  | 6.754   | 8.00  | 11.00  | 14.00  | 19.00  | 24.00  | 2.898 | 16.484  | 7.276   | 9.00  | 11.00  | 15.00  | 20.00  | 26.00   |
| 0.05 | 2.704 | 0.1807397 | 0.0092360 | 0.70 | 0.50 | 13.228  | 4.853   | 8.00  | 10.00  | 12.00  | 16.00  | 20.00  | 2.898 | 14.119  | 5.211   | 8.00  | 10.00  | 13.00  | 17.00  | 21.00   |
| 0.05 | 2.704 | 0.1807397 | 0.0092360 | 0.60 | 0.50 | 10.792  | 3.328   | 7.00  | 8.00   | 10.00  | 13.00  | 15.00  | 2.898 | 11.442  | 3.430   | 8.00  | 9.00   | 11.00  | 13.00  | 16.00   |
| 0.05 | 2.704 | 0.1807397 | 0.0092360 | 0.50 | 0.50 | 8.662   | 2.182   | 6.00  | 7.00   | 8.00   | 10.00  | 11.00  | 2.898 | 9.113   | 2.271   | 7.00  | 7.00   | 9.00   | 10.00  | 12.00   |
| 0.10 | 2.992 | 0.2594297 | 0.0188990 | 1.00 | 1.00 | 370.488 | 362.731 | 45.00 | 111.75 | 259.00 | 513.00 | 849.00 | 3.165 | 500.660 | 496.742 | 62.00 | 151.00 | 350.00 | 680.25 | 1146.10 |
| 0.10 | 2.992 | 0.2594297 | 0.0188990 | 1.10 | 1.10 | 118.191 | 107.734 | 21.00 | 41.00  | 84.00  | 162.00 | 257.00 | 3.165 | 139.080 | 128.551 | 24.00 | 48.00  | 98.00  | 191.00 | 310.10  |
| 0.10 | 2.992 | 0.2594297 | 0.0188990 | 1.20 | 1.10 | 41.354  | 32.139  | 12.00 | 19.00  | 32.00  | 54.00  | 82.00  | 3.165 | 46.714  | 37.475  | 13.00 | 21.00  | 36.00  | 61.00  | 95.00   |
| 0.10 | 2.992 | 0.2594297 | 0.0188990 | 1.30 | 1.10 | 21.421  | 13.743  | 8.00  | 12.00  | 18.00  | 27.00  | 39.00  | 3.165 | 23.356  | 15.276  | 9.00  | 13.00  | 19.00  | 30.00  | 43.00   |
| 0.10 | 2.992 | 0.2594297 | 0.0188990 | 1.40 | 1.10 | 14.154  | 7.788   | 6.00  | 9.00   | 12.00  | 18.00  | 24.00  | 3.165 | 15.132  | 8.171   | 7.00  | 9.00   | 13.00  | 19.00  | 26.00   |
| 0.10 | 2.992 | 0.2594297 | 0.0188990 | 0.90 | 1.10 | 159.363 | 148.202 | 28.00 | 54.00  | 114.00 | 218.00 | 351.00 | 3.165 | 206.673 | 197.184 | 34.00 | 69.00  | 146.00 | 280.00 | 463.00  |
| 0.10 | 2.992 | 0.2594297 | 0.0188990 | 0.80 | 1.10 | 40.390  | 29.639  | 13.00 | 20.00  | 32.00  | 52.00  | 78.00  | 3.165 | 45.965  | 34.289  | 15.00 | 22.00  | 36.00  | 60.00  | 90.00   |
| 0.10 | 2.992 | 0.2594297 | 0.0188990 | 0.70 | 1.10 | 18.301  | 9.982   | 8.00  | 11.00  | 16.00  | 23.00  | 32.00  | 3.165 | 19.621  | 10.700  | 9.00  | 12.00  | 17.00  | 24.00  | 34.00   |
| 0.10 | 2.992 | 0.2594297 | 0.0188990 | 0.60 | 1.10 | 11.084  | 4.508   | 6.00  | 8.00   | 10.00  | 13.00  | 17.00  | 3.165 | 11.637  | 4.763   | 7.00  | 8.00   | 11.00  | 14.00  | 18.00   |
| 0.10 | 2.992 | 0.2594297 | 0.0188990 | 0.50 | 1.10 | 7.807   | 2.542   | 5.00  | 6.00   | 7.00   | 9.00   | 11.00  | 3.165 | 8.258   | 2.683   | 5.00  | 6.00   | 8.00   | 10.00  | 12.00   |
| 0.10 | 2.992 | 0.2594297 | 0.0188990 | 1.10 | 1.20 | 103.720 | 93.272  | 20.00 | 38.00  | 76.00  | 140.00 | 223.00 | 3.165 | 126.933 | 117.720 | 23.00 | 44.00  | 90.00  | 172.00 | 279.00  |
| 0.10 | 2.992 | 0.2594297 | 0.0188990 | 1.20 | 1.20 | 40.950  | 31.507  | 12.00 | 19.00  | 32.00  | 53.00  | 82.00  | 3.165 | 45.396  | 35.491  | 13.00 | 20.00  | 35.00  | 59.00  | 93.00   |
| 0.10 | 2.992 | 0.2594297 | 0.0188990 | 1.30 | 1.20 | 21.564  | 13.784  | 8.00  | 12.00  | 18.00  | 27.00  | 40.00  | 3.165 | 23.318  | 14.997  | 9.00  | 13.00  | 20.00  | 30.00  | 43.00   |
| 0.10 | 2.992 | 0.2594297 | 0.0188990 | 1.40 | 1.20 | 14.138  | 7.560   | 6.00  | 9.00   | 12.00  | 18.00  | 24.00  | 3.165 | 15.122  | 8.187   | 7.00  | 9.00   | 13.00  | 19.00  | 26.00   |
| 0.10 | 2.992 | 0.2594297 | 0.0188990 | 0.90 | 1.20 | 139.944 | 125.787 | 27.00 | 50.00  | 102.00 | 189.00 | 305.00 | 3.165 | 178.749 | 163.450 | 32.00 | 62.00  | 130.00 | 242.00 | 392.00  |
| 0.10 | 2.992 | 0.2594297 | 0.0188990 | 0.80 | 1.20 | 40.433  | 29.176  | 14.00 | 20.00  | 32.00  | 52.00  | 77.00  | 3.165 | 45.492  | 33.485  | 15.00 | 22.00  | 36.00  | 58.00  | 88.00   |
| 0.10 | 2.992 | 0.2594297 | 0.0188990 | 0.70 | 1.20 | 18.298  | 10.015  | 9.00  | 11.00  | 16.00  | 23.00  | 31.00  | 3.165 | 19.771  | 10.834  | 9.00  | 12.00  | 17.00  | 24.00  | 34.00   |
| 0.10 | 2.992 | 0.2594297 | 0.0188990 | 0.60 | 1.20 | 11.097  | 4.490   | 6.00  | 8.00   | 10.00  | 13.00  | 17.00  | 3.165 |         |         |       |        |        |        |         |

|      |       |           |           |      |      |         |         |       |       |       |        |        |       |         |         |       |       |        |        |        |
|------|-------|-----------|-----------|------|------|---------|---------|-------|-------|-------|--------|--------|-------|---------|---------|-------|-------|--------|--------|--------|
| 0.10 | 2.992 | 0.2594297 | 0.0188990 | 0.80 | 1.30 | 38.571  | 27.656  | 13.00 | 19.00 | 31.00 | 49.00  | 75.00  | 3.165 | 43.699  | 31.618  | 14.00 | 21.00 | 35.00  | 56.00  | 84.00  |
| 0.10 | 2.992 | 0.2594297 | 0.0188990 | 0.70 | 1.30 | 18.129  | 9.615   | 9.00  | 11.00 | 16.00 | 22.00  | 31.00  | 3.165 | 19.611  | 10.603  | 9.00  | 12.00 | 17.00  | 24.00  | 34.00  |
| 0.10 | 2.992 | 0.2594297 | 0.0188990 | 0.60 | 1.30 | 11.085  | 4.551   | 6.00  | 8.00  | 10.00 | 13.00  | 17.00  | 3.165 | 11.769  | 4.826   | 7.00  | 8.00  | 11.00  | 14.00  | 18.00  |
| 0.10 | 2.992 | 0.2594297 | 0.0188990 | 0.50 | 1.30 | 7.865   | 2.550   | 5.00  | 6.00  | 7.00  | 9.00   | 11.00  | 3.165 | 8.321   | 2.746   | 5.00  | 6.00  | 8.00   | 10.00  | 12.00  |
| 0.10 | 2.992 | 0.2594297 | 0.0188990 | 1.10 | 1.40 | 72.210  | 60.161  | 18.00 | 29.00 | 54.00 | 95.00  | 151.00 | 3.165 | 88.798  | 75.576  | 21.00 | 35.00 | 66.00  | 118.00 | 185.00 |
| 0.10 | 2.992 | 0.2594297 | 0.0188990 | 1.20 | 1.40 | 36.112  | 25.947  | 12.00 | 18.00 | 29.00 | 47.00  | 70.00  | 3.165 | 41.126  | 30.437  | 13.00 | 20.00 | 32.00  | 54.00  | 81.00  |
| 0.10 | 2.992 | 0.2594297 | 0.0188990 | 1.30 | 1.40 | 21.084  | 13.273  | 8.00  | 12.00 | 18.00 | 27.00  | 38.00  | 3.165 | 22.766  | 14.425  | 9.00  | 13.00 | 19.00  | 29.00  | 41.00  |
| 0.10 | 2.992 | 0.2594297 | 0.0188990 | 1.40 | 1.40 | 13.984  | 7.660   | 6.00  | 9.00  | 12.00 | 17.00  | 24.00  | 3.165 | 14.926  | 8.115   | 7.00  | 9.00  | 13.00  | 19.00  | 25.00  |
| 0.10 | 2.992 | 0.2594297 | 0.0188990 | 0.90 | 1.40 | 85.307  | 71.287  | 22.00 | 36.00 | 64.00 | 112.00 | 178.00 | 3.165 | 106.991 | 91.924  | 25.00 | 42.00 | 80.00  | 142.00 | 224.00 |
| 0.10 | 2.992 | 0.2594297 | 0.0188990 | 0.80 | 1.40 | 36.089  | 24.635  | 13.00 | 19.00 | 30.00 | 46.00  | 68.00  | 3.165 | 41.448  | 29.136  | 14.00 | 21.00 | 33.00  | 53.00  | 79.00  |
| 0.10 | 2.992 | 0.2594297 | 0.0188990 | 0.70 | 1.40 | 17.915  | 9.262   | 9.00  | 11.00 | 16.00 | 22.00  | 30.00  | 3.165 | 19.253  | 10.137  | 9.00  | 12.00 | 17.00  | 24.00  | 32.10  |
| 0.10 | 2.992 | 0.2594297 | 0.0188990 | 0.60 | 1.40 | 11.160  | 4.560   | 6.00  | 8.00  | 10.00 | 13.00  | 17.00  | 3.165 | 11.763  | 4.892   | 7.00  | 8.00  | 11.00  | 14.00  | 18.00  |
| 0.10 | 2.992 | 0.2594297 | 0.0188990 | 0.50 | 1.40 | 7.807   | 2.515   | 5.00  | 6.00  | 7.00  | 9.00   | 11.00  | 3.165 | 8.259   | 2.674   | 5.00  | 6.00  | 8.00   | 10.00  | 12.00  |
| 0.10 | 2.992 | 0.2594297 | 0.0188990 | 1.10 | 0.90 | 93.768  | 83.725  | 18.00 | 33.00 | 68.00 | 128.00 | 204.00 | 3.165 | 113.214 | 104.375 | 22.00 | 40.00 | 81.00  | 151.00 | 251.00 |
| 0.10 | 2.992 | 0.2594297 | 0.0188990 | 1.20 | 0.90 | 39.603  | 30.255  | 11.00 | 18.00 | 31.00 | 52.00  | 78.00  | 3.165 | 43.838  | 33.884  | 12.00 | 20.00 | 34.00  | 57.00  | 87.00  |
| 0.10 | 2.992 | 0.2594297 | 0.0188990 | 1.30 | 0.90 | 21.092  | 13.229  | 8.00  | 12.00 | 18.00 | 27.00  | 38.00  | 3.165 | 23.387  | 15.450  | 9.00  | 13.00 | 19.00  | 30.00  | 43.00  |
| 0.10 | 2.992 | 0.2594297 | 0.0188990 | 1.40 | 0.90 | 14.103  | 7.660   | 6.00  | 9.00  | 12.00 | 18.00  | 24.00  | 3.165 | 14.908  | 8.145   | 7.00  | 9.00  | 13.00  | 19.00  | 25.00  |
| 0.10 | 2.992 | 0.2594297 | 0.0188990 | 0.90 | 0.90 | 121.861 | 110.168 | 23.00 | 43.00 | 88.50 | 166.00 | 263.00 | 3.165 | 149.812 | 137.011 | 27.00 | 53.00 | 107.00 | 205.00 | 328.00 |
| 0.10 | 2.992 | 0.2594297 | 0.0188990 | 0.80 | 0.90 | 38.337  | 27.364  | 13.00 | 19.00 | 31.00 | 50.00  | 75.00  | 3.165 | 43.454  | 31.613  | 14.00 | 21.00 | 34.50  | 56.00  | 85.00  |
| 0.10 | 2.992 | 0.2594297 | 0.0188990 | 0.70 | 0.90 | 17.851  | 9.719   | 8.00  | 11.00 | 15.00 | 22.00  | 30.00  | 3.165 | 19.615  | 10.813  | 9.00  | 12.00 | 17.00  | 24.00  | 34.00  |
| 0.10 | 2.992 | 0.2594297 | 0.0188990 | 0.60 | 0.90 | 10.995  | 4.486   | 6.00  | 8.00  | 10.00 | 13.00  | 17.00  | 3.165 | 11.763  | 4.836   | 7.00  | 8.00  | 11.00  | 14.00  | 18.00  |
| 0.10 | 2.992 | 0.2594297 | 0.0188990 | 0.50 | 0.90 | 7.799   | 2.587   | 5.00  | 6.00  | 7.00  | 9.00   | 11.00  | 3.165 | 8.250   | 2.702   | 5.00  | 6.00  | 8.00   | 10.00  | 12.00  |
| 0.10 | 2.992 | 0.2594297 | 0.0188990 | 1.10 | 0.80 | 62.572  | 52.851  | 15.00 | 25.00 | 47.00 | 84.00  | 132.00 | 3.165 | 73.217  | 62.807  | 16.00 | 28.00 | 54.00  | 99.00  | 155.00 |
| 0.10 | 2.992 | 0.2594297 | 0.0188990 | 1.20 | 0.80 | 33.965  | 25.119  | 11.00 | 16.00 | 27.00 | 44.00  | 67.00  | 3.165 | 37.621  | 28.061  | 11.00 | 18.00 | 30.00  | 49.00  | 75.00  |
| 0.10 | 2.992 | 0.2594297 | 0.0188990 | 1.30 | 0.80 | 20.292  | 12.619  | 8.00  | 11.00 | 17.00 | 26.00  | 37.00  | 3.165 | 21.952  | 13.648  | 9.00  | 12.00 | 18.00  | 28.00  | 40.00  |
| 0.10 | 2.992 | 0.2594297 | 0.0188990 | 1.40 | 0.80 | 13.797  | 7.316   | 6.00  | 9.00  | 12.00 | 17.00  | 23.00  | 3.165 | 14.624  | 7.798   | 7.00  | 9.00  | 13.00  | 18.00  | 25.00  |
| 0.10 | 2.992 | 0.2594297 | 0.0188990 | 0.90 | 0.80 | 72.068  | 62.590  | 16.00 | 28.00 | 53.00 | 94.00  | 153.00 | 3.165 | 86.331  | 73.823  | 19.00 | 34.00 | 64.00  | 116.00 | 185.00 |
| 0.10 | 2.992 | 0.2594297 | 0.0188990 | 0.80 | 0.80 | 34.058  | 23.478  | 12.00 | 17.00 | 28.00 | 44.00  | 65.00  | 3.165 | 38.291  | 27.005  | 13.00 | 19.00 | 31.00  | 49.00  | 73.00  |
| 0.10 | 2.992 | 0.2594297 | 0.0188990 | 0.70 | 0.80 | 17.391  | 9.144   | 8.00  | 11.00 | 15.00 | 21.00  | 29.00  | 3.165 | 18.646  | 9.855   | 9.00  | 12.00 | 16.00  | 23.00  | 31.00  |
| 0.10 | 2.992 | 0.2594297 | 0.0188990 | 0.60 | 0.80 | 10.948  | 4.503   | 6.00  | 8.00  | 10.00 | 13.00  | 17.00  | 3.165 | 11.567  | 4.697   | 7.00  | 8.00  | 11.00  | 14.00  | 18.00  |
| 0.10 | 2.992 | 0.2594297 | 0.0188990 | 0.50 | 0.80 | 7.810   | 2.515   | 5.00  | 6.00  | 7.00  | 9.00   | 11.00  | 3.165 | 8.156   | 2.628   | 5.00  | 6.00  | 8.00   | 9.00   | 12.00  |
| 0.10 | 2.992 | 0.2594297 | 0.0188990 | 1.10 | 0.70 | 37.884  | 29.319  | 11.00 | 17.00 | 30.00 | 50.00  | 76.00  | 3.165 | 41.891  | 32.560  | 12.00 | 19.00 | 33.00  | 55.00  | 85.00  |
| 0.10 | 2.992 | 0.2594297 | 0.0188990 | 1.20 | 0.70 | 26.427  | 18.219  | 9.00  | 14.00 | 22.00 | 34.00  | 50.00  | 3.165 | 29.185  | 20.600  | 10.00 | 15.00 | 23.00  | 37.00  | 56.00  |
| 0.10 | 2.992 | 0.2594297 | 0.0188990 | 1.30 | 0.70 | 18.103  | 10.855  | 8.00  | 10.00 | 15.00 | 23.00  | 32.00  | 3.165 | 19.671  | 12.001  | 8.00  | 11.00 | 17.00  | 25.00  | 35.00  |
| 0.10 | 2.992 | 0.2594297 | 0.0188990 | 1.40 | 0.70 | 13.087  | 6.739   | 6.00  | 8.00  | 12.00 | 16.00  | 22.00  | 3.165 | 14.082  | 7.360   | 6.00  | 9.00  | 12.00  | 18.00  | 24.00  |
| 0.10 | 2.992 | 0.2594297 | 0.0188990 | 0.90 | 0.70 | 39.896  | 31.124  | 11.00 | 18.00 | 31.00 | 52.00  | 81.00  | 3.165 | 45.725  | 36.382  | 13.00 | 20.00 | 35.00  | 60.00  | 92.00  |
| 0.10 | 2.992 | 0.2594297 | 0.0188990 | 0.80 | 0.70 | 26.461  | 17.399  | 10.00 | 14.00 | 22.00 | 33.00  | 49.00  | 3.165 | 29.898  | 19.707  | 11.00 | 16.00 | 25.00  | 38.00  | 56.00  |
| 0.10 | 2.992 | 0.2594297 | 0.0188990 | 0.70 | 0.70 | 16.136  | 8.077   | 8.00  | 10.00 | 14.00 | 20.00  | 27.00  | 3.165 | 17.569  | 9.021   | 9.00  | 11.00 | 15.00  | 22.00  | 29.00  |
| 0.10 | 2.992 | 0.2594297 | 0.0188990 | 0.60 | 0.70 | 10.735  | 4.347   | 6.00  | 8.00  | 10.00 | 13.00  | 16.00  | 3.165 | 11.321  | 4.533   | 7.00  | 8.00  | 10.00  | 13.00  | 17.00  |
| 0.10 | 2.992 | 0.2594297 | 0.0188990 | 0.50 | 0.70 | 7.741   | 2.452   | 5.00  | 6.00  | 7.00  | 9.00   | 11.00  | 3.165 | 8.148   | 2.617   | 5.00  | 6.00  | 8.00   | 9.00   | 12.00  |
| 0.10 | 2.992 | 0.2594297 | 0.0188990 | 1.10 | 0.60 | 23.196  | 15.725  | 8.00  | 12.00 | 19.00 | 30.00  | 44.00  | 3.165 | 24.814  | 16.867  | 9.00  | 13.00 | 20.00  | 32.00  | 48.00  |
| 0.10 | 2.992 | 0.2594297 | 0.0188990 | 1.20 | 0.60 | 19.395  | 12.104  | 8.00  | 11.00 | 16.00 | 25.00  | 35.00  | 3.165 | 21.022  | 13.387  | 8.00  | 12.00 | 18.00  | 26.00  | 38.00  |
| 0.10 | 2.992 | 0.2594297 | 0.0188990 | 1.30 | 0.60 | 15.267  | 8.543   | 7.00  | 9.00  | 13.00 | 19.00  | 26.10  | 3.165 | 16.361  | 9.183   | 7.00  | 10.00 | 14.00  | 21.00  | 28.00  |
| 0.10 | 2.992 | 0.2594297 | 0.0188990 | 1.40 | 0.60 | 11.955  | 5.864   | 6.00  | 8.00  | 11.00 | 15.00  | 20.00  | 3.165 | 12.791  | 6.326   | 6.00  | 8.00  | 11.00  | 16.00  | 21.00  |
| 0.10 | 2.992 | 0.2594297 | 0.0188990 | 0.90 | 0.60 | 23.753  | 16.411  | 8.00  | 12.00 | 19.00 | 31.00  | 45.00  | 3.165 | 26.022  | 18.094  | 9.00  | 13.00 | 21.00  | 33.00  | 50.00  |
| 0.10 | 2.992 | 0.2594297 | 0.0188990 | 0.80 | 0.60 | 19.477  | 11.731  | 8.00  | 11.00 | 17.00 | 25.00  | 35.00  | 3.165 | 21.391  | 12.959  | 9.00  | 12.00 | 18.00  | 27.00  | 38.00  |
| 0.10 | 2.992 | 0.2594297 | 0.0188990 | 0.70 | 0.60 | 14.293  | 7.022   | 7.00  | 9.00  | 13.00 | 18.00  | 23.00  | 3.165 | 15.253  | 7.421   | 8.00  | 10.00 | 14.00  | 19.00  | 25.00  |
| 0.10 | 2.992 | 0.2594297 | 0.0188990 | 0.60 | 0.60 | 10.190  | 3.965   | 6.00  | 7.00  | 9.00  | 12.00  | 15.00  | 3.165 | 10.883  | 4.239   | 6.00  | 8.00  | 10.00  | 13.00  | 16.00  |
| 0.10 | 2.992 | 0.2594297 | 0.0188990 | 0.50 | 0.60 | 7.620   | 2.357   | 5.00  | 6.00  | 7.00  | 9.00   | 11.00  | 3.165 | 7.975   | 2.485   | 5.00  | 6.00  | 8.00   | 9.00   | 11.00  |
| 0.10 | 2.992 | 0.2594297 | 0.0188990 | 1.10 | 0.50 | 14.983  | 9.001   | 6.00  | 9.00  | 13.00 | 19.00  | 27.00  | 3.165 | 15.993  | 9.469   | 7.00  | 9.00  | 14.00  | 20.00  | 29.00  |
| 0.10 | 2.992 | 0.2594297 | 0.0188990 | 1.20 | 0.50 | 13.798  | 7.762   | 6.00  | 8.00  | 12.00 | 17.00  | 24.00  | 3.165 | 14.734  | 8.272   | 6.00  | 9.00  | 13.00  | 18.00  | 26.00  |
| 0.10 | 2.992 | 0.2594297 | 0.0188990 | 1.30 | 0.50 | 12.093  | 6.198   | 6.00  | 8.00  | 11.00 | 15.00  | 20.00  | 3.165 | 12.956  | 6.688   | 6.00  | 8.00  | 11.00  | 16.00  | 22.00  |
| 0.10 | 2.992 | 0.2594297 | 0.0188990 | 1.40 | 0.50 | 10.397  | 4.765   | 5.00  | 7.00  | 9.00  | 13.00  | 17.00  | 3.165 | 10.908  | 4.982   | 6.00  | 7.00  | 10.00  | 13.00  | 17.00  |
| 0.10 | 2.992 | 0.2594297 | 0.0188990 | 0.90 | 0.50 | 15.111  | 8.961   | 6.00  | 9.00  | 13.00 | 19.00  | 27.00  | 3.165 | 16.097  | 9.627   | 7.00  | 9.00  | 14.00  | 20.00  | 29.00  |
| 0.10 | 2.992 | 0.2594297 | 0.0188990 | 0.80 | 0.50 | 14.110  | 7.667   | 6.00  | 9.00  | 12.00 | 18.00  | 24.00  | 3.165 | 14.955  | 8.122   | 7.00  | 9.00  | 13.00  | 19.00  | 26.00  |
| 0.10 | 2.992 | 0.2594297 | 0.0188990 | 0.70 | 0.50 | 11.693  | 5.328   | 6.00  | 8.00  | 11.00 | 14.00  | 19.00  | 3.165 | 12.499  | 5.791   | 7.00  | 8.00  | 11.00  | 15.00  | 20.00  |

|      |       |           |           |      |      |         |         |         |       |        |        |        |       |         |         |       |        |        |        |        |
|------|-------|-----------|-----------|------|------|---------|---------|---------|-------|--------|--------|--------|-------|---------|---------|-------|--------|--------|--------|--------|
| 0.15 | 3.138 | 0.3220597 | 0.0288483 | 1.40 | 1.10 | 14.364  | 9.061   | 5.00    | 8.00  | 12.00  | 18.00  | 26.00  | 3.299 | 15.558  | 9.910   | 6.00  | 9.00   | 13.00  | 20.00  | 29.00  |
| 0.15 | 3.138 | 0.3220597 | 0.0288483 | 0.90 | 1.10 | 248.449 | 236.734 | 36.00   | 78.00 | 178.00 | 342.00 | 553.00 | 3.299 | 334.588 | 326.481 | 44.00 | 104.00 | 238.00 | 454.00 | 746.10 |
| 0.15 | 3.138 | 0.3220597 | 0.0288483 | 0.80 | 1.10 | 54.613  | 45.583  | 13.00   | 22.00 | 41.00  | 73.00  | 114.00 | 3.299 | 64.356  | 55.984  | 15.00 | 25.00  | 48.00  | 85.00  | 137.00 |
| 0.15 | 3.138 | 0.3220597 | 0.0288483 | 0.70 | 1.10 | 20.401  | 13.346  | 8.00    | 11.00 | 17.00  | 26.00  | 38.00  | 3.299 | 22.273  | 14.793  | 9.00  | 12.00  | 18.00  | 28.00  | 41.00  |
| 0.15 | 3.138 | 0.3220597 | 0.0288483 | 0.60 | 1.10 | 11.171  | 5.540   | 6.00    | 7.00  | 10.00  | 14.00  | 18.00  | 3.299 | 11.943  | 5.937   | 6.00  | 8.00   | 11.00  | 14.00  | 20.00  |
| 0.15 | 3.138 | 0.3220597 | 0.0288483 | 0.50 | 1.10 | 7.553   | 2.870   | 5.00    | 6.00  | 7.00   | 9.00   | 11.00  | 3.299 | 7.859   | 2.994   | 5.00  | 6.00   | 7.00   | 9.00   | 12.00  |
| 0.15 | 3.138 | 0.3220597 | 0.0288483 | 1.10 | 1.20 | 125.134 | 119.049 | 19.00   | 40.00 | 89.00  | 170.00 | 279.00 | 3.299 | 152.191 | 144.556 | 23.00 | 50.00  | 109.00 | 207.00 | 339.00 |
| 0.15 | 3.138 | 0.3220597 | 0.0288483 | 1.20 | 1.20 | 45.760  | 38.952  | 11.00   | 18.00 | 34.00  | 61.00  | 95.10  | 3.299 | 51.987  | 44.620  | 11.00 | 20.00  | 39.00  | 70.00  | 111.00 |
| 0.15 | 3.138 | 0.3220597 | 0.0288483 | 1.30 | 1.20 | 22.998  | 17.073  | 7.00    | 11.00 | 18.00  | 29.00  | 45.00  | 3.299 | 25.433  | 19.120  | 8.00  | 12.00  | 20.00  | 33.00  | 50.00  |
| 0.15 | 3.138 | 0.3220597 | 0.0288483 | 1.40 | 1.20 | 14.507  | 9.197   | 6.00    | 8.00  | 12.00  | 18.00  | 26.00  | 3.299 | 15.678  | 10.199  | 6.00  | 9.00   | 13.00  | 20.00  | 29.00  |
| 0.15 | 3.138 | 0.3220597 | 0.0288483 | 0.90 | 1.20 | 229.513 | 219.690 | 34.00   | 74.00 | 163.00 | 316.00 | 509.00 | 3.299 | 316.926 | 307.480 | 44.00 | 100.00 | 224.00 | 432.00 | 713.00 |
| 0.15 | 3.138 | 0.3220597 | 0.0288483 | 0.80 | 1.20 | 52.780  | 43.613  | 13.00   | 22.00 | 40.00  | 70.00  | 111.00 | 3.299 | 62.603  | 53.437  | 15.00 | 26.00  | 46.00  | 83.00  | 133.00 |
| 0.15 | 3.138 | 0.3220597 | 0.0288483 | 0.70 | 1.20 | 20.319  | 13.035  | 8.00    | 11.00 | 17.00  | 26.00  | 37.00  | 3.299 | 22.409  | 14.643  | 9.00  | 12.00  | 18.00  | 28.00  | 42.00  |
| 0.15 | 3.138 | 0.3220597 | 0.0288483 | 0.60 | 1.20 | 11.138  | 5.462   | 6.00    | 7.00  | 10.00  | 14.00  | 18.00  | 3.299 | 11.957  | 6.007   | 6.00  | 8.00   | 10.00  | 15.00  | 20.00  |
| 0.15 | 3.138 | 0.3220597 | 0.0288483 | 0.50 | 1.20 | 7.530   | 2.879   | 5.00    | 5.00  | 7.00   | 9.00   | 11.00  | 3.299 | 7.911   | 3.077   | 5.00  | 6.00   | 7.00   | 9.00   | 12.00  |
| 0.15 | 3.138 | 0.3220597 | 0.0288483 | 1.10 | 1.30 | 112.062 | 104.884 | 19.00   | 38.00 | 80.00  | 152.00 | 250.00 | 3.299 | 140.046 | 133.725 | 22.00 | 45.00  | 98.00  | 190.00 | 317.10 |
| 0.15 | 3.138 | 0.3220597 | 0.0288483 | 1.20 | 1.30 | 44.554  | 37.344  | 10.00   | 18.00 | 34.00  | 59.00  | 93.00  | 3.299 | 50.646  | 43.378  | 11.00 | 20.00  | 38.00  | 67.00  | 106.00 |
| 0.15 | 3.138 | 0.3220597 | 0.0288483 | 1.30 | 1.30 | 23.239  | 17.429  | 7.00    | 11.00 | 18.00  | 30.00  | 45.00  | 3.299 | 24.987  | 18.893  | 8.00  | 12.00  | 20.00  | 32.00  | 49.00  |
| 0.15 | 3.138 | 0.3220597 | 0.0288483 | 1.40 | 1.30 | 14.297  | 9.106   | 5.00    | 8.00  | 12.00  | 18.00  | 26.00  | 3.299 | 15.553  | 9.953   | 6.00  | 8.00   | 13.00  | 20.00  | 29.00  |
| 0.15 | 3.138 | 0.3220597 | 0.0288483 | 0.90 | 1.30 | 191.455 | 180.640 | 30.00   | 64.00 | 136.00 | 262.00 | 426.00 | 3.299 | 263.754 | 250.595 | 38.00 | 85.00  | 187.00 | 359.00 | 595.00 |
| 0.15 | 3.138 | 0.3220597 | 0.0288483 | 0.80 | 1.30 | 52.228  | 42.850  | 13.00   | 22.00 | 39.00  | 70.00  | 109.00 | 3.299 | 61.920  | 51.744  | 15.00 | 25.00  | 46.00  | 82.00  | 128.00 |
| 0.15 | 3.138 | 0.3220597 | 0.0288483 | 0.70 | 1.30 | 20.270  | 12.871  | 8.00    | 11.00 | 17.00  | 26.00  | 37.00  | 3.299 | 22.262  | 14.459  | 8.00  | 12.00  | 18.00  | 29.00  | 41.00  |
| 0.15 | 3.138 | 0.3220597 | 0.0288483 | 0.60 | 1.30 | 11.113  | 5.436   | 6.00    | 7.00  | 10.00  | 14.00  | 18.00  | 3.299 | 11.822  | 5.664   | 6.00  | 8.00   | 11.00  | 14.00  | 19.00  |
| 0.15 | 3.138 | 0.3220597 | 0.0288483 | 0.50 | 1.30 | 7.531   | 2.906   | 5.00    | 5.00  | 7.00   | 9.00   | 11.00  | 3.299 | 7.873   | 3.033   | 5.00  | 6.00   | 7.00   | 9.00   | 12.00  |
| 0.15 | 3.138 | 0.3220597 | 0.0288483 | 1.10 | 1.40 | 99.448  | 90.056  | 18.00   | 35.00 | 72.00  | 136.00 | 219.00 | 3.299 | 125.179 | 116.807 | 21.00 | 43.00  | 89.00  | 170.00 | 277.00 |
| 0.15 | 3.138 | 0.3220597 | 0.0288483 | 1.20 | 1.40 | 43.235  | 35.446  | 11.00   | 18.00 | 33.00  | 57.00  | 89.00  | 3.299 | 49.801  | 42.154  | 11.00 | 20.00  | 37.00  | 66.00  | 105.00 |
| 0.15 | 3.138 | 0.3220597 | 0.0288483 | 1.30 | 1.40 | 22.572  | 16.550  | 7.00    | 11.00 | 18.00  | 29.00  | 44.00  | 3.299 | 24.508  | 18.223  | 8.00  | 12.00  | 19.00  | 32.00  | 48.00  |
| 0.15 | 3.138 | 0.3220597 | 0.0288483 | 1.40 | 1.40 | 14.181  | 9.060   | 6.00    | 8.00  | 12.00  | 18.00  | 26.00  | 3.299 | 15.189  | 9.575   | 6.00  | 8.00   | 13.00  | 19.00  | 28.00  |
| 0.15 | 3.138 | 0.3220597 | 0.0288483 | 0.90 | 1.40 | 151.896 | 141.543 | 25.00   | 51.00 | 108.00 | 209.00 | 335.10 | 3.299 | 210.060 | 198.509 | 33.00 | 69.00  | 149.00 | 288.00 | 467.00 |
| 0.15 | 3.138 | 0.3220597 | 0.0288483 | 0.80 | 1.40 | 48.551  | 39.812  | 13.00   | 21.00 | 36.00  | 64.00  | 102.00 | 3.299 | 58.534  | 49.324  | 14.00 | 24.00  | 44.00  | 76.00  | 122.00 |
| 0.15 | 3.138 | 0.3220597 | 0.0288483 | 0.70 | 1.40 | 20.053  | 12.910  | 8.00    | 11.00 | 16.00  | 25.00  | 37.00  | 3.299 | 22.045  | 14.441  | 9.00  | 12.00  | 18.00  | 28.00  | 41.00  |
| 0.15 | 3.138 | 0.3220597 | 0.0288483 | 0.60 | 1.40 | 11.180  | 5.523   | 6.00    | 7.00  | 10.00  | 14.00  | 18.00  | 3.299 | 11.840  | 5.909   | 6.00  | 8.00   | 10.00  | 15.00  | 19.00  |
| 0.15 | 3.138 | 0.3220597 | 0.0288483 | 0.50 | 1.40 | 7.532   | 2.849   | 5.00    | 6.00  | 7.00   | 9.00   | 11.00  | 3.299 | 7.918   | 3.075   | 5.00  | 6.00   | 7.00   | 9.00   | 12.00  |
| 0.15 | 3.138 | 0.3220597 | 0.0288483 | 1.10 | 0.90 | 102.349 | 94.362  | 17.00   | 35.00 | 74.00  | 139.00 | 225.00 | 3.299 | 121.860 | 115.405 | 19.00 | 40.00  | 87.00  | 166.00 | 269.00 |
| 0.15 | 3.138 | 0.3220597 | 0.0288483 | 1.20 | 0.90 | 42.617  | 35.965  | 10.00   | 17.00 | 32.00  | 57.00  | 90.00  | 3.299 | 49.119  | 42.172  | 11.00 | 19.00  | 37.00  | 66.00  | 104.00 |
| 0.15 | 3.138 | 0.3220597 | 0.0288483 | 1.30 | 0.90 | 22.562  | 16.351  | 7.00    | 11.00 | 18.00  | 29.00  | 44.00  | 3.299 | 24.558  | 18.353  | 8.00  | 12.00  | 19.00  | 32.00  | 48.00  |
| 0.15 | 3.138 | 0.3220597 | 0.0288483 | 1.40 | 0.90 | 14.279  | 8.914   | 6.00    | 8.00  | 12.00  | 18.00  | 26.00  | 3.299 | 15.106  | 9.547   | 6.00  | 8.00   | 13.00  | 19.00  | 28.00  |
| 0.15 | 3.138 | 0.3220597 | 0.0288483 | 0.90 | 0.90 | 158.951 | 146.277 | 25.00   | 53.00 | 115.00 | 219.00 | 351.00 | 3.299 | 202.704 | 191.139 | 30.00 | 66.00  | 147.00 | 278.25 | 448.00 |
| 0.15 | 3.138 | 0.3220597 | 0.0288483 | 0.80 | 0.90 | 49.364  | 40.765  | 13.00   | 21.00 | 37.00  | 65.00  | 102.00 | 3.299 | 58.553  | 49.181  | 14.00 | 24.00  | 44.00  | 77.00  | 123.00 |
| 0.15 | 3.138 | 0.3220597 | 0.0288483 | 0.70 | 0.90 | 19.824  | 12.815  | 8.00    | 11.00 | 16.00  | 25.00  | 37.00  | 3.299 | 22.102  | 14.428  | 8.00  | 12.00  | 18.00  | 28.00  | 41.00  |
| 0.15 | 3.138 | 0.3220597 | 0.0288483 | 0.60 | 0.90 | 11.145  | 5.559   | 6.00    | 7.00  | 10.00  | 14.00  | 18.00  | 3.299 | 11.882  | 5.894   | 6.00  | 8.00   | 10.00  | 14.00  | 20.00  |
| 0.15 | 3.138 | 0.3220597 | 0.0288483 | 0.50 | 0.90 | 7.466   | 2.861   | 5.00    | 5.00  | 7.00   | 9.00   | 11.00  | 3.299 | 7.890   | 2.997   | 5.00  | 6.00   | 7.00   | 9.00   | 12.00  |
| 0.15 | 3.138 | 0.3220597 | 0.0288483 | 1.10 | 0.80 | 67.628  | 61.260  | 12.00   | 24.00 | 49.00  | 91.00  | 149.00 | 3.299 | 80.533  | 73.908  | 14.00 | 28.00  | 58.00  | 110.00 | 177.00 |
| 0.15 | 3.138 | 0.3220597 | 0.0288483 | 1.20 | 0.80 | 36.767  | 30.431  | 9.00    | 15.00 | 28.00  | 48.00  | 76.00  | 3.299 | 41.266  | 34.370  | 10.00 | 17.00  | 31.00  | 55.00  | 85.00  |
| 0.15 | 3.138 | 0.3220597 | 0.0288483 | 1.30 | 0.80 | 20.874  | 14.832  | 7.00    | 10.00 | 17.00  | 27.00  | 40.00  | 3.299 | 23.081  | 16.749  | 7.00  | 11.00  | 18.00  | 30.00  | 45.00  |
| 0.15 | 3.138 | 0.3220597 | 0.0288483 | 1.40 | 0.80 | 13.826  | 8.559   | 6.00    | 8.00  | 12.00  | 17.00  | 25.00  | 3.299 | 14.941  | 9.525   | 6.00  | 8.00   | 13.00  | 19.00  | 27.10  |
| 0.15 | 3.138 | 0.3220597 | 0.0288483 | 0.90 | 0.80 | 86.928  | 79.998  | 15.00   | 30.00 | 62.00  | 117.00 | 190.00 | 3.299 | 104.858 | 97.428  | 18.00 | 36.00  | 75.00  | 143.00 | 231.00 |
| 0.15 | 3.138 | 0.3220597 | 0.0288483 | 0.80 | 0.80 | 40.754  | 32.807  | 11.00   | 18.00 | 31.00  | 54.00  | 83.00  | 3.299 | 47.774  | 39.523  | 12.00 | 20.00  | 36.00  | 63.00  | 100.00 |
| 0.15 | 3.138 | 0.3220597 | 0.0288483 | 0.70 | 0.80 | 19.037  | 12.195  | 8.00    | 10.00 | 16.00  | 24.00  | 34.10  | 3.299 | 20.971  | 13.481  | 8.00  | 11.00  | 17.00  | 27.00  | 39.00  |
| 0.15 | 3.138 | 0.3220597 | 0.0288483 | 0.60 | 0.80 | 11.009  | 5.271   | 6.00    | 7.00  | 10.00  | 13.00  | 18.00  | 3.299 | 11.765  | 5.785   | 6.00  | 8.00   | 10.00  | 14.00  | 19.00  |
| 0.15 | 3.138 | 0.3220597 | 0.0288483 | 0.50 | 0.80 | 7.427   | 2.785   | 5.00    | 5.00  | 7.00   | 9.00   | 11.00  | 3.299 | 7.800   | 2.941   | 5.00  | 6.00   | 7.00   | 9.00   | 12.00  |
| 0.15 | 3.138 | 0.3220597 | 0.0288483 | 1.10 | 0.70 | 39.454  | 33.000  | 9.00    | 16.00 | 29.00  | 53.00  | 84.00  | 3.299 | 45.823  | 38.860  | 11.00 | 18.00  | 34.00  | 61.00  | 96.00  |
| 0.15 | 3.138 | 0.3220597 | 0.0288483 | 1.20 | 0.70 | 27.722  | 21.353  | 8.00    | 13.00 | 22.00  | 36.00  | 55.00  | 3.299 | 31.145  | 24.107  | 9.00  | 14.00  | 24.00  | 41.00  | 63.00  |
| 0.15 | 3.138 | 0.3220597 | 0.0288483 | 1.30 | 0.70 | 18.546  | 12.648  | 7.00    | 10.00 | 15.00  | 24.00  | 35.00  | 3.299 | 20.218  | 14.164  | 7.00  | 10.00  | 16.00  | 26.00  | 39.00  |
| 0.15 | 3.138 | 0.3220597 | 0.0288483 | 1.40 | 0.70 | 13.035  | 7.796   | 5.00    | 8.00  | 11.00  | 16.00  | 23.00  | 3.299 | 13.975  | 8.627   | 6.00  | 8.00   | 12.00  | 18.00  | 25.00  |
| 0.15 | 3.138 | 0.3220597 | 0.0288483 | 0.90 | 0.70 | 44.674  | 36.836  | 11.00</ |       |        |        |        |       |         |         |       |        |        |        |        |

|      |       |           |           |      |      |        |        |      |       |       |       |       |       |        |        |      |       |       |       |       |
|------|-------|-----------|-----------|------|------|--------|--------|------|-------|-------|-------|-------|-------|--------|--------|------|-------|-------|-------|-------|
| 0.15 | 3.138 | 0.3220597 | 0.0288483 | 1.30 | 0.60 | 14.999 | 9.572  | 6.00 | 8.00  | 13.00 | 19.00 | 28.00 | 3.299 | 16.381 | 10.451 | 6.00 | 9.00  | 14.00 | 21.00 | 30.00 |
| 0.15 | 3.138 | 0.3220597 | 0.0288483 | 1.40 | 0.60 | 11.563 | 6.523  | 5.00 | 7.00  | 10.00 | 14.00 | 20.00 | 3.299 | 12.375 | 7.167  | 5.00 | 7.00  | 11.00 | 16.00 | 21.00 |
| 0.15 | 3.138 | 0.3220597 | 0.0288483 | 0.90 | 0.60 | 24.945 | 18.994 | 7.00 | 11.00 | 19.00 | 32.25 | 50.00 | 3.299 | 27.024 | 20.530 | 8.00 | 12.00 | 21.00 | 36.00 | 54.00 |
| 0.15 | 3.138 | 0.3220597 | 0.0288483 | 0.80 | 0.60 | 20.906 | 14.496 | 7.00 | 11.00 | 17.00 | 27.00 | 40.00 | 3.299 | 22.724 | 15.993 | 8.00 | 11.00 | 18.00 | 30.00 | 43.00 |
| 0.15 | 3.138 | 0.3220597 | 0.0288483 | 0.70 | 0.60 | 14.430 | 8.265  | 6.00 | 9.00  | 12.00 | 18.00 | 25.00 | 3.299 | 15.814 | 9.443  | 7.00 | 9.00  | 13.00 | 20.00 | 28.00 |
| 0.15 | 3.138 | 0.3220597 | 0.0288483 | 0.60 | 0.60 | 9.981  | 4.580  | 5.00 | 7.00  | 9.00  | 12.00 | 16.00 | 3.299 | 10.629 | 4.888  | 6.00 | 7.00  | 10.00 | 13.00 | 17.00 |
| 0.15 | 3.138 | 0.3220597 | 0.0288483 | 0.50 | 0.60 | 7.193  | 2.628  | 4.00 | 5.00  | 7.00  | 8.00  | 11.00 | 3.299 | 7.558  | 2.784  | 5.00 | 6.00  | 7.00  | 9.00  | 11.00 |
| 0.15 | 3.138 | 0.3220597 | 0.0288483 | 1.10 | 0.50 | 14.525 | 9.589  | 5.00 | 8.00  | 12.00 | 19.00 | 27.00 | 3.299 | 15.892 | 10.578 | 6.00 | 8.00  | 13.00 | 20.00 | 30.00 |
| 0.15 | 3.138 | 0.3220597 | 0.0288483 | 1.20 | 0.50 | 13.269 | 8.221  | 5.00 | 7.00  | 11.00 | 17.00 | 24.00 | 3.299 | 14.309 | 9.220  | 6.00 | 8.00  | 12.00 | 18.00 | 26.00 |
| 0.15 | 3.138 | 0.3220597 | 0.0288483 | 1.30 | 0.50 | 11.566 | 6.774  | 5.00 | 7.00  | 10.00 | 15.00 | 20.00 | 3.299 | 12.562 | 7.482  | 5.00 | 7.00  | 11.00 | 16.00 | 22.00 |
| 0.15 | 3.138 | 0.3220597 | 0.0288483 | 1.40 | 0.50 | 9.898  | 5.296  | 5.00 | 6.00  | 9.00  | 12.00 | 17.00 | 3.299 | 10.425 | 5.539  | 5.00 | 6.00  | 9.00  | 13.00 | 18.00 |
| 0.15 | 3.138 | 0.3220597 | 0.0288483 | 0.90 | 0.50 | 15.136 | 10.172 | 6.00 | 8.00  | 12.00 | 19.00 | 28.00 | 3.299 | 15.977 | 10.859 | 6.00 | 8.00  | 13.00 | 20.00 | 30.00 |
| 0.15 | 3.138 | 0.3220597 | 0.0288483 | 0.80 | 0.50 | 13.887 | 8.759  | 5.00 | 8.00  | 12.00 | 18.00 | 25.00 | 3.299 | 15.198 | 9.655  | 6.00 | 8.00  | 13.00 | 19.00 | 28.00 |
| 0.15 | 3.138 | 0.3220597 | 0.0288483 | 0.70 | 0.50 | 11.549 | 6.141  | 5.00 | 7.00  | 10.00 | 14.00 | 20.00 | 3.299 | 12.463 | 6.820  | 6.00 | 8.00  | 11.00 | 15.00 | 21.00 |
| 0.15 | 3.138 | 0.3220597 | 0.0288483 | 0.60 | 0.50 | 8.847  | 3.856  | 5.00 | 6.00  | 8.00  | 11.00 | 14.00 | 3.299 | 9.539  | 4.201  | 5.00 | 7.00  | 9.00  | 12.00 | 15.00 |
| 0.15 | 3.138 | 0.3220597 | 0.0288483 | 0.50 | 0.50 | 6.881  | 2.458  | 4.00 | 5.00  | 6.00  | 8.00  | 10.00 | 3.299 | 7.258  | 2.627  | 5.00 | 5.00  | 7.00  | 8.00  | 11.00 |

TABLE S.8. ARL Results of the Max-EWMA control chart when pure shift occurs in the shape2 parameter of beta distribution ( $\Delta_\delta \in (1.0, 1.1, 1.2, 1.3, 1.4, 0.9, 0.8, 0.7, 0.6, 0.5)$ ,  $\Delta_\alpha = 1.0$ ) when  $X \sim B(\gamma, \delta)$ ,  $T \sim UNH(\alpha, \lambda)$ ,  $\mu = 0.20$ ,  $\alpha_0 = 1.50$ ,  $\lambda_0 = 1.00$ ,  $ARL_0 \in (370, 500)$  and  $\theta_e \in (0.05, 0.10, 0.15)$

| $\theta_e$ | $K$   | $EM$      | $VM$      | $\Delta_\delta$ | $\Delta_\alpha$ | $ARL$   | $SDRL$  | $q10$ | $q25$  | $q50$  | $q75$  | $q90$  | $K$           | $ARL$   | $SDRL$  | $q10$ | $q25$  | $q50$  | $q75$  | $q90$   |
|------------|-------|-----------|-----------|-----------------|-----------------|---------|---------|-------|--------|--------|--------|--------|---------------|---------|---------|-------|--------|--------|--------|---------|
| Case 1     |       |           |           |                 |                 |         |         |       |        |        |        |        | Case 2        |         |         |       |        |        |        |         |
| $\phi=290$ |       |           |           |                 |                 |         |         |       |        |        |        |        | $ARL_0 = 500$ |         |         |       |        |        |        |         |
| 0.05       | 2.687 | 0.1808245 | 0.0092612 | 1.00            | 1.00            | 370.888 | 356.335 | 53.00 | 116.00 | 262.00 | 504.00 | 844.00 | 2.887         | 500.295 | 477.988 | 65.00 | 155.00 | 354.00 | 687.25 | 1131.10 |
| 0.05       | 2.687 | 0.1808245 | 0.0092612 | 1.10            | 1.00            | 22.133  | 10.340  | 11.00 | 15.00  | 20.00  | 27.00  | 36.00  | 2.887         | 23.883  | 11.326  | 12.00 | 16.00  | 21.00  | 29.00  | 39.00   |
| 0.05       | 2.687 | 0.1808245 | 0.0092612 | 1.20            | 1.00            | 9.796   | 2.861   | 7.00  | 8.00   | 9.00   | 11.00  | 14.00  | 2.887         | 10.385  | 3.030   | 7.00  | 8.00   | 10.00  | 12.00  | 14.00   |
| 0.05       | 2.687 | 0.1808245 | 0.0092612 | 1.30            | 1.00            | 6.709   | 1.524   | 5.00  | 6.00   | 7.00   | 8.00   | 9.00   | 2.887         | 7.008   | 1.565   | 5.00  | 6.00   | 7.00   | 8.00   | 9.00    |
| 0.05       | 2.687 | 0.1808245 | 0.0092612 | 1.40            | 1.00            | 5.248   | 0.990   | 4.00  | 5.00   | 5.00   | 6.00   | 6.00   | 2.887         | 5.482   | 1.012   | 4.00  | 5.00   | 5.00   | 6.00   | 7.00    |
| 0.05       | 2.687 | 0.1808245 | 0.0092612 | 0.90            | 1.00            | 17.675  | 8.329   | 9.00  | 12.00  | 16.00  | 22.00  | 29.00  | 2.887         | 18.987  | 9.010   | 10.00 | 13.00  | 17.00  | 23.00  | 31.00   |
| 0.05       | 2.687 | 0.1808245 | 0.0092612 | 0.80            | 1.00            | 6.868   | 2.117   | 4.00  | 5.00   | 7.00   | 8.00   | 10.00  | 2.887         | 7.228   | 2.214   | 5.00  | 6.00   | 7.00   | 8.00   | 10.00   |
| 0.05       | 2.687 | 0.1808245 | 0.0092612 | 0.70            | 1.00            | 4.099   | 1.030   | 3.00  | 3.00   | 4.00   | 5.00   | 5.00   | 2.887         | 4.255   | 1.054   | 3.00  | 4.00   | 4.00   | 5.00   | 6.00    |
| 0.05       | 2.687 | 0.1808245 | 0.0092612 | 0.60            | 1.00            | 2.829   | 0.639   | 2.00  | 2.00   | 3.00   | 3.00   | 4.00   | 2.887         | 2.936   | 0.652   | 2.00  | 3.00   | 3.00   | 3.00   | 4.00    |
| 0.05       | 2.687 | 0.1808245 | 0.0092612 | 0.50            | 1.00            | 2.117   | 0.382   | 2.00  | 2.00   | 2.00   | 2.00   | 3.00   | 2.887         | 2.178   | 0.416   | 2.00  | 2.00   | 2.00   | 2.00   | 3.00    |
| 0.10       | 2.988 | 0.2588680 | 0.0188363 | 1.00            | 1.00            | 370.462 | 359.852 | 47.00 | 113.00 | 265.00 | 514.25 | 836.00 | 3.162         | 501.280 | 486.161 | 61.90 | 152.00 | 348.00 | 695.00 | 1162.00 |
| 0.10       | 2.988 | 0.2588680 | 0.0188363 | 1.10            | 1.00            | 23.105  | 14.324  | 9.00  | 13.00  | 20.00  | 29.00  | 41.00  | 3.162         | 25.191  | 15.581  | 10.00 | 14.00  | 21.00  | 32.00  | 46.00   |
| 0.10       | 2.988 | 0.2588680 | 0.0188363 | 1.20            | 1.00            | 8.644   | 3.216   | 5.00  | 6.00   | 8.00   | 10.00  | 13.00  | 3.162         | 9.062   | 3.319   | 5.00  | 7.00   | 8.00   | 11.00  | 13.00   |
| 0.10       | 2.988 | 0.2588680 | 0.0188363 | 1.30            | 1.00            | 5.602   | 1.523   | 4.00  | 5.00   | 5.00   | 6.00   | 8.00   | 3.162         | 5.847   | 1.592   | 4.00  | 5.00   | 6.00   | 7.00   | 8.00    |
| 0.10       | 2.988 | 0.2588680 | 0.0188363 | 1.40            | 1.00            | 4.300   | 0.963   | 3.00  | 4.00   | 4.00   | 5.00   | 6.00   | 3.162         | 4.488   | 0.986   | 3.00  | 4.00   | 4.00   | 5.00   | 6.00    |
| 0.10       | 2.988 | 0.2588680 | 0.0188363 | 0.90            | 1.00            | 16.973  | 10.248  | 7.00  | 10.00  | 14.00  | 21.00  | 30.00  | 3.162         | 17.966  | 10.815  | 7.00  | 10.00  | 15.00  | 23.00  | 32.00   |
| 0.10       | 2.988 | 0.2588680 | 0.0188363 | 0.80            | 1.00            | 5.847   | 2.196   | 3.00  | 4.00   | 5.00   | 7.00   | 9.00   | 3.162         | 6.075   | 2.261   | 4.00  | 4.00   | 6.00   | 7.00   | 9.00    |
| 0.10       | 2.988 | 0.2588680 | 0.0188363 | 0.70            | 1.00            | 3.342   | 0.983   | 2.00  | 3.00   | 3.00   | 4.00   | 5.00   | 3.162         | 3.474   | 1.019   | 2.00  | 3.00   | 3.00   | 4.00   | 5.00    |
| 0.10       | 2.988 | 0.2588680 | 0.0188363 | 0.60            | 1.00            | 2.304   | 0.570   | 2.00  | 2.00   | 2.00   | 3.00   | 3.00   | 3.162         | 2.373   | 0.591   | 2.00  | 2.00   | 2.00   | 3.00   | 3.00    |
| 0.10       | 2.988 | 0.2588680 | 0.0188363 | 0.50            | 1.00            | 1.770   | 0.463   | 1.00  | 2.00   | 2.00   | 2.00   | 2.00   | 3.162         | 1.816   | 0.452   | 1.00  | 2.00   | 2.00   | 2.00   | 2.00    |
| 0.15       | 3.105 | 0.3220389 | 0.0289256 | 1.00            | 1.00            | 370.190 | 370.757 | 46.00 | 108.00 | 257.00 | 507.25 | 846.10 | 3.267         | 500.041 | 481.910 | 61.00 | 153.00 | 359.00 | 698.00 | 1120.00 |
| 0.15       | 3.105 | 0.3220389 | 0.0289256 | 1.10            | 1.00            | 26.201  | 18.971  | 9.00  | 13.00  | 21.00  | 34.00  | 50.00  | 3.267         | 29.186  | 21.702  | 9.00  | 14.00  | 23.00  | 37.25  | 57.00   |
| 0.15       | 3.105 | 0.3220389 | 0.0289256 | 1.20            | 1.00            | 8.349   | 3.599   | 5.00  | 6.00   | 8.00   | 10.00  | 13.00  | 3.267         | 8.855   | 3.888   | 5.00  | 6.00   | 8.00   | 11.00  | 14.00   |
| 0.15       | 3.105 | 0.3220389 | 0.0289256 | 1.30            | 1.00            | 5.132   | 1.602   | 3.00  | 4.00   | 5.00   | 6.00   | 7.00   | 3.267         | 5.336   | 1.663   | 4.00  | 4.00   | 5.00   | 6.00   | 7.00    |
| 0.15       | 3.105 | 0.3220389 | 0.0289256 | 1.40            | 1.00            | 3.879   | 0.982   | 3.00  | 3.00   | 4.00   | 4.00   | 5.00   | 3.267         | 4.031   | 1.023   | 3.00  | 3.00   | 4.00   | 5.00   | 5.00    |
| 0.15       | 3.105 | 0.3220389 | 0.0289256 | 0.90            | 1.00            | 17.104  | 11.605  | 6.00  | 9.00   | 14.00  | 22.00  | 32.00  | 3.267         | 18.568  | 12.657  | 7.00  | 10.00  | 15.00  | 24.00  | 35.00   |
| 0.15       | 3.105 | 0.3220389 | 0.0289256 | 0.80            | 1.00            | 5.345   | 2.255   | 3.00  | 4.00   | 5.00   | 6.00   | 8.00   | 3.267         | 5.552   | 2.357   | 3.00  | 4.00   | 5.00   | 7.00   | 9.00    |
| 0.15       | 3.105 | 0.3220389 | 0.0289256 | 0.70            | 1.00            | 2.995   | 0.974   | 2.00  | 2.00   | 3.00   | 4.00   | 4.00   | 3.267         | 3.075   | 0.995   | 2.00  | 2.00   | 3.00   | 4.00   | 4.00    |
| 0.15       | 3.105 | 0.3220389 | 0.0289256 | 0.60            | 1.00            | 2.059   | 0.558   | 1.00  | 2.00   | 2.00   | 2.00   | 3.00   | 3.267         | 2.117   | 0.570   | 2.00  | 2.00   | 2.00   | 2.00   | 3.00    |
| 0.15       | 3.105 | 0.3220389 | 0.0289256 | 0.50            | 1.00            | 1.504   | 0.514   | 1.00  | 1.00   | 1.00   | 2.00   | 2.00   | 3.267         | 1.549   | 0.514   | 1.00  | 1.00   | 2.00   | 2.00   | 2.00    |

| Case 2     |       |           |           |      |      |         |         |       |        |        |        |        |       |         |         |       |        |        |        |         |
|------------|-------|-----------|-----------|------|------|---------|---------|-------|--------|--------|--------|--------|-------|---------|---------|-------|--------|--------|--------|---------|
| $\phi=148$ |       |           |           |      |      |         |         |       |        |        |        |        |       |         |         |       |        |        |        |         |
| 0.05       | 2.693 | 0.1815312 | 0.0092496 | 1.00 | 1.00 | 371.560 | 361.955 | 52.00 | 119.00 | 260.00 | 504.25 | 837.00 | 2.888 | 500.143 | 485.266 | 68.00 | 155.00 | 351.00 | 687.00 | 1135.00 |
| 0.05       | 2.693 | 0.1815312 | 0.0092496 | 1.10 | 1.00 | 36.949  | 21.604  | 16.00 | 22.00  | 32.00  | 47.00  | 66.00  | 2.888 | 41.003  | 24.936  | 17.00 | 24.00  | 35.00  | 52.00  | 73.00   |
| 0.05       | 2.693 | 0.1815312 | 0.0092496 | 1.20 | 1.00 | 15.089  | 5.554   | 9.00  | 11.00  | 14.00  | 18.00  | 22.00  | 2.888 | 15.969  | 5.847   | 10.00 | 12.00  | 15.00  | 19.00  | 24.00   |
| 0.05       | 2.693 | 0.1815312 | 0.0092496 | 1.30 | 1.00 | 9.804   | 2.706   | 7.00  | 8.00   | 9.00   | 11.00  | 13.00  | 2.888 | 10.344  | 2.836   | 7.00  | 8.00   | 10.00  | 12.00  | 14.00   |
| 0.05       | 2.693 | 0.1815312 | 0.0092496 | 1.40 | 1.00 | 7.564   | 1.746   | 6.00  | 6.00   | 7.00   | 9.00   | 10.00  | 2.888 | 7.930   | 1.799   | 6.00  | 7.00   | 8.00   | 9.00   | 10.00   |
| 0.05       | 2.693 | 0.1815312 | 0.0092496 | 0.90 | 1.00 | 28.334  | 16.563  | 12.00 | 17.00  | 24.00  | 36.00  | 50.00  | 2.888 | 30.440  | 17.884  | 13.00 | 18.00  | 26.00  | 38.00  | 54.00   |
| 0.05       | 2.693 | 0.1815312 | 0.0092496 | 0.80 | 1.00 | 10.153  | 3.901   | 6.00  | 7.00   | 9.00   | 12.00  | 15.00  | 2.888 | 10.645  | 4.054   | 6.00  | 8.00   | 10.00  | 13.00  | 16.00   |
| 0.05       | 2.693 | 0.1815312 | 0.0092496 | 0.70 | 1.00 | 5.769   | 1.722   | 4.00  | 5.00   | 6.00   | 7.00   | 8.00   | 2.888 | 6.028   | 1.790   | 4.00  | 5.00   | 6.00   | 7.00   | 8.00    |
| 0.05       | 2.693 | 0.1815312 | 0.0092496 | 0.60 | 1.00 | 3.876   | 1.013   | 3.00  | 3.00   | 4.00   | 4.00   | 5.00   | 2.888 | 4.036   | 1.037   | 3.00  | 3.00   | 4.00   | 5.00   | 5.00    |
| 0.05       | 2.693 | 0.1815312 | 0.0092496 | 0.50 | 1.00 | 2.802   | 0.682   | 2.00  | 2.00   | 3.00   | 3.00   | 4.00   | 2.888 | 2.905   | 0.701   | 2.00  | 2.00   | 3.00   | 3.00   | 4.00    |
| 0.10       | 2.990 | 0.2591099 | 0.0188559 | 1.00 | 1.00 | 370.920 | 367.800 | 44.00 | 110.00 | 258.00 | 506.00 | 849.00 | 3.164 | 500.945 | 495.139 | 60.00 | 146.00 | 350.00 | 696.00 | 1154.10 |
| 0.10       | 2.990 | 0.2591099 | 0.0188559 | 1.10 | 1.00 | 44.489  | 33.226  | 14.00 | 21.00  | 35.00  | 58.00  | 88.00  | 3.164 | 50.161  | 38.501  | 15.00 | 23.00  | 39.00  | 65.00  | 99.00   |
| 0.10       | 2.990 | 0.2591099 | 0.0188559 | 1.20 | 1.00 | 14.314  | 6.772   | 7.00  | 9.00   | 13.00  | 17.00  | 23.00  | 3.164 | 15.229  | 7.435   | 8.00  | 10.00  | 14.00  | 18.00  | 25.00   |
| 0.10       | 2.990 | 0.2591099 | 0.0188559 | 1.30 | 1.00 | 8.595   | 3.015   | 5.00  | 6.00   | 8.00   | 10.00  | 13.00  | 3.164 | 9.012   | 3.137   | 6.00  | 7.00   | 8.00   | 11.00  | 13.00   |
| 0.10       | 2.990 | 0.2591099 | 0.0188559 | 1.40 | 1.00 | 6.400   | 1.788   | 4.00  | 5.00   | 6.00   | 7.00   | 9.00   | 3.164 | 6.666   | 1.880   | 5.00  | 5.00   | 6.00   | 8.00   | 9.00    |
| 0.10       | 2.990 | 0.2591099 | 0.0188559 | 0.90 | 1.00 | 28.620  | 20.604  | 9.00  | 14.00  | 23.00  | 37.00  | 55.00  | 3.164 | 31.228  | 22.906  | 10.00 | 15.00  | 25.00  | 40.00  | 60.00   |
| 0.10       | 2.990 | 0.2591099 | 0.0188559 | 0.80 | 1.00 | 8.898   | 4.098   | 5.00  | 6.00   | 8.00   | 11.00  | 14.00  | 3.164 | 9.214   | 4.241   | 5.00  | 6.00   | 8.00   | 11.00  | 15.00   |
| 0.10       | 2.990 | 0.2591099 | 0.0188559 | 0.70 | 1.00 | 4.797   | 1.719   | 3.00  | 4.00   | 5.00   | 6.00   | 7.00   | 3.164 | 4.998   | 1.788   | 3.00  | 4.00   | 5.00   | 6.00   | 7.00    |
| 0.10       | 2.990 | 0.2591099 | 0.0188559 | 0.60 | 1.00 | 3.148   | 0.948   | 2.00  | 2.00   | 3.00   | 4.00   | 4.00   | 3.164 | 3.262   | 0.977   | 2.00  | 3.00   | 3.00   | 4.00   | 5.00    |
| 0.10       | 2.990 | 0.2591099 | 0.0188559 | 0.50 | 1.00 | 2.289   | 0.614   | 2.00  | 2.00   | 2.00   | 3.00   | 3.00   | 3.164 | 2.356   | 0.624   | 2.00  | 2.00   | 2.00   | 3.00   | 3.00    |
| 0.15       | 3.108 | 0.3218169 | 0.0287890 | 1.00 | 1.00 | 370.290 | 361.407 | 44.00 | 111.00 | 261.00 | 518.00 | 842.00 | 3.276 | 499.754 | 488.871 | 59.00 | 152.00 | 352.00 | 693.25 | 1133.00 |
| 0.15       | 3.108 | 0.3218169 | 0.0287890 | 1.10 | 1.00 | 55.740  | 47.435  | 13.00 | 22.00  | 41.00  | 74.00  | 117.00 | 3.276 | 66.505  | 57.520  | 15.00 | 26.00  | 49.00  | 89.00  | 142.00  |
| 0.15       | 3.108 | 0.3218169 | 0.0287890 | 1.20 | 1.00 | 14.844  | 8.353   | 7.00  | 9.00   | 13.00  | 18.00  | 26.00  | 3.276 | 16.238  | 9.514   | 7.00  | 10.00  | 14.00  | 20.00  | 29.00   |
| 0.15       | 3.108 | 0.3218169 | 0.0287890 | 1.30 | 1.00 | 8.258   | 3.420   | 5.00  | 6.00   | 8.00   | 10.00  | 13.00  | 3.276 | 8.710   | 3.637   | 5.00  | 6.00   | 8.00   | 10.00  | 13.00   |
| 0.15       | 3.108 | 0.3218169 | 0.0287890 | 1.40 | 1.00 | 5.939   | 1.919   | 4.00  | 5.00   | 6.00   | 7.00   | 8.00   | 3.276 | 6.201   | 2.036   | 4.00  | 5.00   | 6.00   | 7.00   | 9.00    |
| 0.15       | 3.108 | 0.3218169 | 0.0287890 | 0.90 | 1.00 | 30.517  | 24.750  | 8.00  | 13.00  | 23.00  | 40.00  | 62.00  | 3.276 | 33.587  | 26.930  | 9.00  | 14.00  | 26.00  | 44.00  | 69.00   |
| 0.15       | 3.108 | 0.3218169 | 0.0287890 | 0.80 | 1.00 | 8.386   | 4.480   | 4.00  | 5.00   | 7.00   | 10.00  | 14.00  | 3.276 | 8.805   | 4.691   | 4.00  | 5.00   | 8.00   | 11.00  | 15.00   |
| 0.15       | 3.108 | 0.3218169 | 0.0287890 | 0.70 | 1.00 | 4.342   | 1.727   | 2.00  | 3.00   | 4.00   | 5.00   | 7.00   | 3.276 | 4.489   | 1.776   | 3.00  | 3.00   | 4.00   | 5.00   | 7.00    |
| 0.15       | 3.108 | 0.3218169 | 0.0287890 | 0.60 | 1.00 | 2.818   | 0.931   | 2.00  | 2.00   | 3.00   | 3.00   | 4.00   | 3.276 | 2.916   | 0.955   | 2.00  | 2.00   | 3.00   | 3.00   | 4.00    |
| 0.15       | 3.108 | 0.3218169 | 0.0287890 | 0.50 | 1.00 | 2.050   | 0.607   | 1.00  | 2.00   | 2.00   | 2.00   | 3.00   | 3.276 | 2.095   | 0.603   | 1.00  | 2.00   | 2.00   | 2.00   | 3.00    |
| Case 3     |       |           |           |      |      |         |         |       |        |        |        |        |       |         |         |       |        |        |        |         |
| $\phi=80$  |       |           |           |      |      |         |         |       |        |        |        |        |       |         |         |       |        |        |        |         |
| 0.05       | 2.707 | 0.1806445 | 0.0092291 | 1.00 | 1.00 | 370.250 | 354.125 | 53.00 | 116.00 | 260.00 | 514.00 | 841.00 | 2.887 | 500.238 | 490.462 | 66.00 | 153.00 | 346.00 | 687.00 | 1133.00 |
| 0.05       | 2.707 | 0.1806445 | 0.0092291 | 1.10 | 1.00 | 61.446  | 43.044  | 21.00 | 31.00  | 50.00  | 79.00  | 118.00 | 2.887 | 68.992  | 48.833  | 24.00 | 35.00  | 55.00  | 89.00  | 134.00  |
| 0.05       | 2.707 | 0.1806445 | 0.0092291 | 1.20 | 1.00 | 23.219  | 10.683  | 12.00 | 16.00  | 21.00  | 28.00  | 37.00  | 2.887 | 24.445  | 11.090  | 13.00 | 17.00  | 22.00  | 30.00  | 39.00   |
| 0.05       | 2.707 | 0.1806445 | 0.0092291 | 1.30 | 1.00 | 14.397  | 4.876   | 9.00  | 11.00  | 14.00  | 17.00  | 21.00  | 2.887 | 15.127  | 5.137   | 10.00 | 11.00  | 14.00  | 18.00  | 22.00   |
| 0.05       | 2.707 | 0.1806445 | 0.0092291 | 1.40 | 1.00 | 10.820  | 2.995   | 7.00  | 9.00   | 10.00  | 12.00  | 15.00  | 2.887 | 11.340  | 3.108   | 8.00  | 9.00   | 11.00  | 13.00  | 15.00   |
| 0.05       | 2.707 | 0.1806445 | 0.0092291 | 0.90 | 1.00 | 43.729  | 29.797  | 15.00 | 23.00  | 36.00  | 56.00  | 82.00  | 2.887 | 47.430  | 31.920  | 16.00 | 25.00  | 39.00  | 61.00  | 88.00   |
| 0.05       | 2.707 | 0.1806445 | 0.0092291 | 0.80 | 1.00 | 14.746  | 6.759   | 8.00  | 10.00  | 13.00  | 18.00  | 24.00  | 2.887 | 15.544  | 7.211   | 8.00  | 10.00  | 14.00  | 19.00  | 25.00   |
| 0.05       | 2.707 | 0.1806445 | 0.0092291 | 0.70 | 1.00 | 8.118   | 2.933   | 5.00  | 6.00   | 8.00   | 10.00  | 12.00  | 2.887 | 8.457   | 3.059   | 5.00  | 6.00   | 8.00   | 10.00  | 12.00   |
| 0.05       | 2.707 | 0.1806445 | 0.0092291 | 0.60 | 1.00 | 5.263   | 1.632   | 3.00  | 4.00   | 5.00   | 6.00   | 7.00   | 2.887 | 5.474   | 1.682   | 4.00  | 4.00   | 5.00   | 6.00   | 8.00    |
| 0.05       | 2.707 | 0.1806445 | 0.0092291 | 0.50 | 1.00 | 3.751   | 1.047   | 3.00  | 3.00   | 4.00   | 4.00   | 5.00   | 2.887 | 3.862   | 1.057   | 3.00  | 3.00   | 4.00   | 4.00   | 5.00    |
| 0.10       | 2.989 | 0.2591572 | 0.0188247 | 1.00 | 1.00 | 369.027 | 357.319 | 46.00 | 114.00 | 259.50 | 501.25 | 830.00 | 3.165 | 500.856 | 488.539 | 61.00 | 151.00 | 352.00 | 691.00 | 1156.00 |
| 0.10       | 2.989 | 0.2591572 | 0.0188247 | 1.10 | 1.00 | 82.757  | 70.261  | 19.00 | 33.00  | 61.00  | 111.00 | 175.10 | 3.165 | 100.167 | 85.899  | 22.90 | 39.00  | 75.00  | 134.00 | 213.00  |
| 0.10       | 2.989 | 0.2591572 | 0.0188247 | 1.20 | 1.00 | 24.375  | 14.713  | 10.00 | 14.00  | 20.00  | 31.00  | 44.00  | 3.165 | 26.930  | 16.766  | 11.00 | 15.00  | 22.00  | 34.00  | 49.00   |
| 0.10       | 2.989 | 0.2591572 | 0.0188247 | 1.30 | 1.00 | 13.576  | 5.935   | 7.00  | 9.00   | 12.00  | 16.00  | 21.00  | 3.165 | 14.605  | 6.504   | 8.00  | 10.00  | 13.00  | 18.00  | 23.00   |
| 0.10       | 2.989 | 0.2591572 | 0.0188247 | 1.40 | 1.00 | 9.606   | 3.414   | 6.00  | 7.00   | 9.00   | 11.00  | 14.00  | 3.165 | 10.160  | 3.630   | 6.00  | 8.00   | 9.00   | 12.00  | 15.00   |
| 0.10       | 2.989 | 0.2591572 | 0.0188247 | 0.90 | 1.00 | 46.383  | 37.119  | 12.00 | 20.00  | 35.00  | 61.00  | 96.00  | 3.165 | 52.006  | 42.671  | 13.00 | 22.00  | 39.00  | 69.00  | 108.00  |
| 0.10       | 2.989 | 0.2591572 | 0.0188247 | 0.80 | 1.00 | 13.487  | 7.662   | 6.00  | 8.00   | 12.00  | 17.00  | 23.00  | 3.165 | 14.121  | 7.928   | 6.00  | 9.00   | 12.00  | 18.00  | 24.00   |
| 0.10       | 2.989 | 0.2591572 | 0.0188247 | 0.70 | 1.00 | 6.851   | 2.933   | 4.00  | 5.00   | 6.00   | 8.00   | 11.00  | 3.165 | 7.163   | 3.087   | 4.00  | 5.00   | 7.00   | 9.00   | 11.00   |
| 0.10       | 2.989 | 0.2591572 | 0.0188247 | 0.60 | 1.00 | 4.350   | 1.560   | 3.00  | 3.00   | 4.00   | 5.00   | 6.00   | 3.165 | 4.493   | 1.633   | 3.00  | 3.00   | 4.00   | 5.00   | 7.00    |
| 0.10       | 2.989 | 0.2591572 | 0.0188247 | 0.50 | 1.00 | 3.052   | 0.978   | 2.00  | 2.00   | 3.00   | 4.00   | 4.00   | 3.165 | 3.149   | 1.003   | 2.00  | 2.00   | 3.00   | 4.00   | 4.00    |
| 0.15       | 3.117 | 0.3219652 | 0.0288123 | 1.00 | 1.00 | 371.183 | 357.213 | 45.00 | 112.00 | 263.00 | 520.00 | 837.00 | 3.290 | 500.849 | 485.976 | 56.00 | 150.00 | 355.00 | 704.25 | 1155.10 |
| 0.15       | 3.117 | 0.3219652 | 0.0288123 | 1.10 | 1.00 | 115.003 | 106.107 | 20.00 | 39.00  | 82.00  | 157.00 | 255.00 | 3.290 | 145.668 | 137.895 | 24.00 | 49.00  | 104.00 | 195.00 | 322.00  |
| 0.15       | 3.117 | 0.3219652 | 0.0288123 | 1.20 | 1.00 | 29.135  | 21.059  | 10.00 | 14.00  | 23.00  | 37.00  | 56.00  | 3.290 | 33.779  | 24.736  | 11.00 | 16.00  | 27.00  | 44.00  | 66.00   |
| 0.15       | 3.117 | 0.3219652 | 0.0288123 | 1.30 | 1.00 | 14.373  | 7.915   | 7.00  | 9.00   | 12.00  | 18.00  | 25.00  | 3.290 | 15.605  | 8.688   | 7.00  | 9.00   | 13.00  | 19.00  | 27.00   |
| 0.15       | 3.117 | 0.3219652 | 0.0288123 | 1.40 | 1.00 | 9.550   | 4.068   | 5.00  | 7.00   | 9.00   | 11.00  | 15.00  | 3.290 | 10.097  | 4.310   | 6.00  | 7.00   | 9.00   | 12.00  | 16.00   |
| 0.15       | 3.117 | 0.3219652 | 0.0288123 | 0.90 | 1.00 | 50.203  | 44.264  | 11.00 | 20.00  | 37.00  | 66.00  | 107.00 | 3.290 | 57.124  | 51.240  | 11.00 | 21.00  |        |        |         |

|               |       |           |           |      |      |         |         |       |        |        |        |        |       |         |         |       |        |        |        |         |  |
|---------------|-------|-----------|-----------|------|------|---------|---------|-------|--------|--------|--------|--------|-------|---------|---------|-------|--------|--------|--------|---------|--|
| 0.15          | 3.117 | 0.3219652 | 0.0288123 | 0.70 | 1.00 | 6.341   | 3.107   | 3.00  | 4.00   | 6.00   | 8.00   | 10.00  | 3.290 | 6.686   | 3.330   | 3.00  | 4.00   | 6.00   | 8.00   | 11.00   |  |
| 0.15          | 3.117 | 0.3219652 | 0.0288123 | 0.60 | 1.00 | 3.921   | 1.581   | 2.00  | 3.00   | 4.00   | 5.00   | 6.00   | 3.290 | 4.074   | 1.646   | 2.00  | 3.00   | 4.00   | 5.00   | 6.00    |  |
| 0.15          | 3.117 | 0.3219652 | 0.0288123 | 0.50 | 1.00 | 2.727   | 0.951   | 2.00  | 2.00   | 3.00   | 3.00   | 4.00   | 3.290 | 2.802   | 0.978   | 2.00  | 2.00   | 3.00   | 3.00   | 4.00    |  |
| <b>Case 4</b> |       |           |           |      |      |         |         |       |        |        |        |        |       |         |         |       |        |        |        |         |  |
| $\phi=31$     |       |           |           |      |      |         |         |       |        |        |        |        |       |         |         |       |        |        |        |         |  |
| 0.05          | 2.704 | 0.1807397 | 0.0092360 | 1.00 | 1.00 | 370.385 | 354.100 | 54.00 | 122.00 | 260.00 | 510.00 | 825.00 | 2.898 | 500.880 | 489.431 | 70.00 | 153.00 | 350.00 | 693.00 | 1138.00 |  |
| 0.05          | 2.704 | 0.1807397 | 0.0092360 | 1.10 | 1.00 | 138.487 | 116.844 | 32.90 | 56.00  | 103.00 | 184.25 | 290.00 | 2.898 | 168.559 | 145.829 | 38.00 | 66.00  | 126.00 | 223.00 | 351.00  |  |
| 0.05          | 2.704 | 0.1807397 | 0.0092360 | 1.20 | 1.00 | 49.317  | 30.888  | 20.00 | 28.00  | 41.00  | 62.00  | 90.00  | 2.898 | 55.313  | 35.614  | 22.00 | 30.00  | 46.00  | 70.00  | 101.00  |  |
| 0.05          | 2.704 | 0.1807397 | 0.0092360 | 1.30 | 1.00 | 28.062  | 13.424  | 14.00 | 19.00  | 25.00  | 34.00  | 45.10  | 2.898 | 30.428  | 14.383  | 16.00 | 20.00  | 27.00  | 37.00  | 50.00   |  |
| 0.05          | 2.704 | 0.1807397 | 0.0092360 | 1.40 | 1.00 | 19.967  | 7.612   | 12.00 | 15.00  | 19.00  | 24.00  | 30.00  | 2.898 | 21.421  | 8.343   | 13.00 | 16.00  | 20.00  | 25.00  | 32.00   |  |
| 0.05          | 2.704 | 0.1807397 | 0.0092360 | 0.90 | 1.00 | 81.465  | 66.539  | 21.00 | 35.00  | 62.00  | 106.00 | 168.00 | 2.898 | 94.593  | 77.144  | 24.00 | 40.00  | 72.00  | 127.00 | 194.00  |  |
| 0.05          | 2.704 | 0.1807397 | 0.0092360 | 0.80 | 1.00 | 26.790  | 15.967  | 11.00 | 15.00  | 23.00  | 34.00  | 47.00  | 2.898 | 29.067  | 17.788  | 12.00 | 17.00  | 25.00  | 37.00  | 52.00   |  |
| 0.05          | 2.704 | 0.1807397 | 0.0092360 | 0.70 | 1.00 | 13.929  | 6.637   | 7.00  | 9.00   | 13.00  | 17.00  | 22.00  | 2.898 | 14.819  | 6.974   | 7.00  | 10.00  | 13.00  | 18.00  | 24.00   |  |
| 0.05          | 2.704 | 0.1807397 | 0.0092360 | 0.60 | 1.00 | 8.714   | 3.575   | 5.00  | 6.00   | 8.00   | 11.00  | 13.00  | 2.898 | 9.134   | 3.716   | 5.00  | 6.00   | 8.00   | 11.00  | 14.00   |  |
| 0.05          | 2.704 | 0.1807397 | 0.0092360 | 0.50 | 1.00 | 5.978   | 2.151   | 4.00  | 4.00   | 6.00   | 7.00   | 9.00   | 2.898 | 6.230   | 2.206   | 4.00  | 5.00   | 6.00   | 7.00   | 9.00    |  |
| 0.10          | 2.992 | 0.2594297 | 0.0188990 | 1.00 | 1.00 | 370.380 | 364.296 | 47.00 | 115.00 | 259.00 | 502.25 | 829.10 | 3.165 | 500.219 | 494.183 | 61.00 | 154.00 | 346.00 | 682.25 | 1143.00 |  |
| 0.10          | 2.992 | 0.2594297 | 0.0188990 | 1.10 | 1.00 | 217.524 | 205.595 | 35.00 | 73.00  | 155.50 | 293.00 | 481.00 | 3.165 | 283.791 | 268.312 | 42.00 | 92.00  | 202.00 | 390.00 | 633.00  |  |
| 0.10          | 2.992 | 0.2594297 | 0.0188990 | 1.20 | 1.00 | 70.073  | 56.645  | 19.00 | 30.00  | 53.00  | 92.00  | 146.00 | 3.165 | 83.969  | 70.657  | 21.00 | 35.00  | 63.00  | 111.00 | 175.00  |  |
| 0.10          | 2.992 | 0.2594297 | 0.0188990 | 1.30 | 1.00 | 33.281  | 21.549  | 13.00 | 18.00  | 27.00  | 42.00  | 61.00  | 3.165 | 37.304  | 24.720  | 14.00 | 20.00  | 30.00  | 48.00  | 70.00   |  |
| 0.10          | 2.992 | 0.2594297 | 0.0188990 | 1.40 | 1.00 | 21.202  | 11.305  | 10.00 | 13.00  | 18.00  | 26.00  | 36.00  | 3.165 | 23.274  | 12.551  | 11.00 | 14.00  | 20.00  | 29.00  | 40.00   |  |
| 0.10          | 2.992 | 0.2594297 | 0.0188990 | 0.90 | 1.00 | 88.678  | 79.422  | 17.00 | 32.00  | 65.00  | 120.00 | 191.00 | 3.165 | 103.117 | 95.822  | 19.00 | 37.00  | 74.00  | 138.00 | 226.00  |  |
| 0.10          | 2.992 | 0.2594297 | 0.0188990 | 0.80 | 1.00 | 26.350  | 19.147  | 8.00  | 13.00  | 21.00  | 34.00  | 51.00  | 3.165 | 29.204  | 21.824  | 9.00  | 14.00  | 23.00  | 38.00  | 57.00   |  |
| 0.10          | 2.992 | 0.2594297 | 0.0188990 | 0.70 | 1.00 | 12.444  | 7.113   | 5.00  | 7.00   | 11.00  | 16.00  | 22.00  | 3.165 | 13.276  | 7.789   | 6.00  | 8.00   | 11.00  | 17.00  | 24.00   |  |
| 0.10          | 2.992 | 0.2594297 | 0.0188990 | 0.60 | 1.00 | 7.446   | 3.636   | 4.00  | 5.00   | 7.00   | 9.00   | 12.00  | 3.165 | 7.850   | 3.780   | 4.00  | 5.00   | 7.00   | 10.00  | 13.00   |  |
| 0.10          | 2.992 | 0.2594297 | 0.0188990 | 0.50 | 1.00 | 5.018   | 2.118   | 3.00  | 3.00   | 5.00   | 6.00   | 8.00   | 3.165 | 5.192   | 2.173   | 3.00  | 4.00   | 5.00   | 6.00   | 8.00    |  |
| 0.15          | 3.138 | 0.3220597 | 0.0288483 | 1.00 | 1.00 | 370.275 | 362.434 | 43.00 | 111.00 | 257.00 | 512.00 | 847.10 | 3.299 | 500.151 | 491.222 | 58.00 | 144.00 | 352.00 | 692.00 | 1141.00 |  |
| 0.15          | 3.138 | 0.3220597 | 0.0288483 | 1.10 | 1.00 | 317.173 | 316.173 | 40.00 | 94.00  | 219.50 | 431.00 | 729.00 | 3.299 | 448.134 | 439.858 | 53.00 | 136.00 | 315.00 | 615.00 | 1009.00 |  |
| 0.15          | 3.138 | 0.3220597 | 0.0288483 | 1.20 | 1.00 | 108.036 | 98.629  | 20.00 | 38.00  | 78.00  | 146.00 | 237.10 | 3.299 | 138.644 | 128.632 | 25.00 | 48.00  | 99.50  | 187.00 | 306.00  |  |
| 0.15          | 3.138 | 0.3220597 | 0.0288483 | 1.30 | 1.00 | 46.233  | 36.312  | 13.00 | 21.00  | 35.00  | 61.00  | 95.00  | 3.299 | 55.090  | 44.284  | 14.00 | 23.00  | 42.00  | 73.00  | 113.00  |  |
| 0.15          | 3.138 | 0.3220597 | 0.0288483 | 1.40 | 1.00 | 26.253  | 17.732  | 10.00 | 14.00  | 21.00  | 33.00  | 49.00  | 3.299 | 29.778  | 20.342  | 11.00 | 15.00  | 24.00  | 38.00  | 56.00   |  |
| 0.15          | 3.138 | 0.3220597 | 0.0288483 | 0.90 | 1.00 | 93.463  | 87.570  | 15.00 | 32.00  | 67.00  | 126.00 | 207.00 | 3.299 | 110.371 | 104.134 | 17.00 | 37.00  | 78.00  | 151.00 | 243.00  |  |
| 0.15          | 3.138 | 0.3220597 | 0.0288483 | 0.80 | 1.00 | 27.252  | 21.504  | 7.00  | 12.00  | 21.00  | 36.00  | 55.00  | 3.299 | 30.258  | 24.720  | 8.00  | 13.00  | 23.00  | 40.00  | 61.00   |  |
| 0.15          | 3.138 | 0.3220597 | 0.0288483 | 0.70 | 1.00 | 12.157  | 7.909   | 4.00  | 7.00   | 10.00  | 16.00  | 23.00  | 3.299 | 12.987  | 8.567   | 5.00  | 7.00   | 11.00  | 17.00  | 25.00   |  |
| 0.15          | 3.138 | 0.3220597 | 0.0288483 | 0.60 | 1.00 | 6.994   | 3.828   | 3.00  | 4.00   | 6.00   | 9.00   | 12.00  | 3.299 | 7.222   | 3.960   | 3.00  | 4.00   | 6.00   | 9.00   | 12.00   |  |
| 0.15          | 3.138 | 0.3220597 | 0.0288483 | 0.50 | 1.00 | 4.523   | 2.092   | 2.00  | 3.00   | 4.00   | 6.00   | 7.00   | 3.299 | 4.684   | 2.192   | 2.00  | 3.00   | 4.00   | 6.00   | 8.00    |  |

TABLE S.9. ARL Results of the Max-EWMA control chart when pure shift occurs in the shape parameter of UNH distribution ( $\Delta_\alpha \in (1.0, 1.1, 1.2, 1.3, 1.4, 0.9, 0.8, 0.7, 0.6, 0.5)$ ,  $\Delta_\delta = 1.0$ ) when  $X \sim B(\gamma, \delta)$ ,  $T \sim UNH(\alpha, \lambda)$ ,  $\mu = 0.20$ ,  $\alpha_0 = 1.50$ ,  $\lambda_0 = 1.00$ ,  $ARL_0 \in (370, 500)$  and  $\theta_e \in (0.05, 0.10, 0.15)$

| $\theta_e$    | $K$   | $EM$      | $VM$      | $\Delta_\delta$ | $\Delta_\alpha$ | $ARL$   | $SDRL$  | $q10$ | $q25$  | $q50$  | $q75$  | $q90$  | $K$           | $ARL$   | $SDRL$  | $q10$ | $q25$  | $q50$  | $q75$  | $q90$   |  |  |  |  |  |  |  |  |
|---------------|-------|-----------|-----------|-----------------|-----------------|---------|---------|-------|--------|--------|--------|--------|---------------|---------|---------|-------|--------|--------|--------|---------|--|--|--|--|--|--|--|--|
|               |       |           |           |                 |                 |         |         |       |        |        |        |        | $ARL_0 = 370$ |         |         |       |        |        |        |         |  |  |  |  |  |  |  |  |
| <b>Case I</b> |       |           |           |                 |                 |         |         |       |        |        |        |        |               |         |         |       |        |        |        |         |  |  |  |  |  |  |  |  |
| $\phi=290$    |       |           |           |                 |                 |         |         |       |        |        |        |        |               |         |         |       |        |        |        |         |  |  |  |  |  |  |  |  |
| 0.05          | 2.687 | 0.1808245 | 0.0092612 | 1.00            | 1.00            | 370.888 | 356.335 | 53.00 | 116.00 | 262.00 | 504.00 | 844.00 | 2.887         | 500.295 | 477.988 | 65.00 | 155.00 | 354.00 | 687.25 | 1131.10 |  |  |  |  |  |  |  |  |
| 0.05          | 2.687 | 0.1808245 | 0.0092612 | 1.00            | 1.10            | 166.979 | 149.948 | 32.00 | 60.00  | 123.00 | 224.00 | 363.00 | 2.887         | 200.971 | 182.821 | 37.00 | 71.00  | 145.00 | 273.00 | 433.00  |  |  |  |  |  |  |  |  |
| 0.05          | 2.687 | 0.1808245 | 0.0092612 | 1.00            | 1.20            | 75.040  | 60.525  | 20.00 | 33.00  | 57.00  | 98.00  | 154.00 | 2.887         | 85.655  | 70.110  | 22.00 | 36.00  | 65.00  | 112.00 | 175.00  |  |  |  |  |  |  |  |  |
| 0.05          | 2.687 | 0.1808245 | 0.0092612 | 1.00            | 1.30            | 44.760  | 31.815  | 15.00 | 22.00  | 36.00  | 58.00  | 85.00  | 2.887         | 49.571  | 35.870  | 16.00 | 24.00  | 40.00  | 64.00  | 97.00   |  |  |  |  |  |  |  |  |
| 0.05          | 2.687 | 0.1808245 | 0.0092612 | 1.00            | 1.40            | 31.034  | 20.013  | 12.00 | 17.00  | 26.00  | 40.00  | 58.00  | 2.887         | 33.906  | 21.602  | 13.00 | 18.00  | 29.00  | 43.00  | 62.00   |  |  |  |  |  |  |  |  |
| 0.05          | 2.687 | 0.1808245 | 0.0092612 | 1.00            | 0.90            | 243.084 | 224.121 | 45.00 | 86.00  | 173.00 | 328.00 | 530.00 | 2.887         | 323.282 | 298.973 | 55.00 | 111.00 | 233.00 | 436.00 | 707.00  |  |  |  |  |  |  |  |  |
| 0.05          | 2.687 | 0.1808245 | 0.0092612 | 1.00            | 0.80            | 94.582  | 72.085  | 28.00 | 44.00  | 73.00  | 123.00 | 190.00 | 2.887         | 115.197 | 89.784  | 33.00 | 51.00  | 88.00  | 151.00 | 237.00  |  |  |  |  |  |  |  |  |
| 0.05          | 2.687 | 0.1808245 | 0.0092612 | 1.00            | 0.70            | 44.753  | 25.606  | 20.00 | 27.00  | 38.00  | 55.00  | 78.00  | 2.887         | 49.551  | 28.656  | 22.00 | 29.00  | 42.00  | 62.00  | 87.00   |  |  |  |  |  |  |  |  |
| 0.05          | 2.687 | 0.1808245 | 0.0092612 | 1.00            | 0.60            | 26.413  | 10.708  | 15.00 | 19.00  | 24.00  | 32.00  | 40.00  | 2.887         | 28.867  | 11.704  | 17.00 | 20.00  | 27.00  | 34.00  | 44.00   |  |  |  |  |  |  |  |  |
| 0.05          | 2.687 | 0.1808245 | 0.0092612 | 1.00            | 0.50            | 18.302  | 5.242   | 12.00 | 15.00  | 17.00  | 21.00  | 25.00  | 2.887         | 19.625  | 5.708   | 13.00 | 16.00  | 19.00  | 22.00  | 27.00   |  |  |  |  |  |  |  |  |
| 0.10          | 2.988 | 0.2588680 | 0.0188363 | 1.00            | 1.00            | 370.462 | 359.852 | 47.00 | 113.00 | 265.00 | 514.25 | 836.00 | 3.162         | 501.280 | 486.161 | 61.90 | 152.00 | 348.00 | 695.00 | 1162.00 |  |  |  |  |  |  |  |  |
| 0.10          | 2.988 | 0.2588680 | 0.0188363 | 1.00            | 1.10            | 175.473 | 166.208 | 27.00 | 57.00  | 124.00 | 242.00 | 389.00 | 3.162         | 214.847 | 203.599 | 31.00 | 68.00  | 153.50 | 295.00 | 479.00  |  |  |  |  |  |  |  |  |

|                              |       |           |           |      |      |         |         |       |        |        |        |         |       |         |         |       |        |        |        |         |  |
|------------------------------|-------|-----------|-----------|------|------|---------|---------|-------|--------|--------|--------|---------|-------|---------|---------|-------|--------|--------|--------|---------|--|
| 0.10                         | 2.988 | 0.2588680 | 0.0188363 | 1.00 | 1.20 | 79.723  | 69.868  | 17.00 | 30.00  | 59.00  | 106.00 | 172.00  | 3.162 | 92.837  | 82.299  | 18.00 | 34.00  | 68.00  | 126.00 | 199.00  |  |
| 0.10                         | 2.988 | 0.2588680 | 0.0188363 | 1.00 | 1.30 | 45.871  | 37.961  | 12.00 | 19.00  | 35.00  | 60.00  | 94.00   | 3.162 | 51.320  | 42.762  | 13.00 | 22.00  | 39.00  | 67.00  | 106.00  |  |
| 0.10                         | 2.988 | 0.2588680 | 0.0188363 | 1.00 | 1.40 | 30.430  | 22.646  | 9.00  | 14.00  | 24.00  | 40.00  | 59.00   | 3.162 | 33.906  | 26.024  | 10.00 | 15.00  | 26.00  | 44.00  | 68.00   |  |
| 0.10                         | 2.988 | 0.2588680 | 0.0188363 | 1.00 | 0.90 | 354.386 | 335.532 | 50.00 | 116.00 | 252.00 | 489.00 | 792.00  | 3.162 | 482.968 | 469.339 | 59.00 | 148.00 | 342.00 | 672.00 | 1082.10 |  |
| 0.10                         | 2.988 | 0.2588680 | 0.0188363 | 1.00 | 0.80 | 171.460 | 155.965 | 32.00 | 61.00  | 125.00 | 230.00 | 371.10  | 3.162 | 220.906 | 204.006 | 37.00 | 75.00  | 161.00 | 303.00 | 485.00  |  |
| 0.10                         | 2.988 | 0.2588680 | 0.0188363 | 1.00 | 0.70 | 69.668  | 55.058  | 20.00 | 31.00  | 53.00  | 91.00  | 140.00  | 3.162 | 87.156  | 70.772  | 23.00 | 37.00  | 66.00  | 115.00 | 181.10  |  |
| 0.10                         | 2.988 | 0.2588680 | 0.0188363 | 1.00 | 0.60 | 33.901  | 20.487  | 14.00 | 20.00  | 29.00  | 42.00  | 61.00   | 3.162 | 39.101  | 24.771  | 16.00 | 22.00  | 32.00  | 49.00  | 71.00   |  |
| 0.10                         | 2.988 | 0.2588680 | 0.0188363 | 1.00 | 0.50 | 19.988  | 8.480   | 11.00 | 14.00  | 18.00  | 24.00  | 31.00   | 3.162 | 21.951  | 9.860   | 12.00 | 15.00  | 20.00  | 26.00  | 35.00   |  |
| 0.15                         | 3.105 | 0.3220389 | 0.0289256 | 1.00 | 1.00 | 370.190 | 370.757 | 46.00 | 108.00 | 257.00 | 507.25 | 846.10  | 3.267 | 500.041 | 481.910 | 61.00 | 153.00 | 359.00 | 698.00 | 1120.00 |  |
| 0.15                         | 3.105 | 0.3220389 | 0.0289256 | 1.00 | 1.10 | 176.963 | 170.981 | 24.00 | 55.00  | 125.00 | 243.00 | 402.00  | 3.267 | 224.086 | 215.871 | 30.00 | 69.00  | 160.00 | 309.00 | 505.00  |  |
| 0.15                         | 3.105 | 0.3220389 | 0.0289256 | 1.00 | 1.20 | 82.957  | 76.601  | 15.00 | 29.00  | 59.00  | 112.00 | 184.00  | 3.267 | 99.240  | 92.552  | 17.00 | 34.00  | 71.00  | 134.00 | 219.00  |  |
| 0.15                         | 3.105 | 0.3220389 | 0.0289256 | 1.00 | 1.30 | 46.735  | 40.789  | 10.00 | 18.00  | 35.00  | 63.00  | 99.00   | 3.267 | 53.419  | 46.752  | 11.00 | 20.00  | 39.00  | 71.00  | 115.00  |  |
| 0.15                         | 3.105 | 0.3220389 | 0.0289256 | 1.00 | 1.40 | 30.635  | 25.239  | 8.00  | 13.00  | 23.00  | 40.00  | 64.00   | 3.267 | 34.558  | 28.741  | 9.00  | 14.00  | 26.00  | 46.00  | 71.00   |  |
| 0.15                         | 3.105 | 0.3220389 | 0.0289256 | 1.00 | 0.90 | 440.823 | 439.360 | 51.00 | 130.00 | 309.50 | 601.25 | 1002.00 | 3.267 | 600.831 | 585.967 | 67.00 | 179.75 | 425.00 | 836.00 | 1369.10 |  |
| 0.15                         | 3.105 | 0.3220389 | 0.0289256 | 1.00 | 0.80 | 279.839 | 271.041 | 37.00 | 87.00  | 196.00 | 381.00 | 639.00  | 3.267 | 396.672 | 388.706 | 49.90 | 118.75 | 277.00 | 553.00 | 900.00  |  |
| 0.15                         | 3.105 | 0.3220389 | 0.0289256 | 1.00 | 0.70 | 127.352 | 114.605 | 24.00 | 45.00  | 92.00  | 172.00 | 278.00  | 3.267 | 175.925 | 165.968 | 28.00 | 58.00  | 124.00 | 241.00 | 385.10  |  |
| 0.15                         | 3.105 | 0.3220389 | 0.0289256 | 1.00 | 0.60 | 55.120  | 42.774  | 16.00 | 24.00  | 42.00  | 73.00  | 112.00  | 3.267 | 70.328  | 58.467  | 18.00 | 29.00  | 53.00  | 92.00  | 146.00  |  |
| 0.15                         | 3.105 | 0.3220389 | 0.0289256 | 1.00 | 0.50 | 26.453  | 16.005  | 12.00 | 15.00  | 22.00  | 33.00  | 47.00   | 3.267 | 31.260  | 19.881  | 13.00 | 18.00  | 26.00  | 39.00  | 57.00   |  |
| <b>Case 2</b>                |       |           |           |      |      |         |         |       |        |        |        |         |       |         |         |       |        |        |        |         |  |
| <b><math>\phi=148</math></b> |       |           |           |      |      |         |         |       |        |        |        |         |       |         |         |       |        |        |        |         |  |
| 0.05                         | 2.693 | 0.1815312 | 0.0092496 | 1.00 | 1.00 | 371.560 | 361.955 | 52.00 | 119.00 | 260.00 | 504.25 | 837.00  | 2.888 | 500.143 | 485.266 | 68.00 | 155.00 | 351.00 | 687.00 | 1135.00 |  |
| 0.05                         | 2.693 | 0.1815312 | 0.0092496 | 1.00 | 1.10 | 170.088 | 154.535 | 32.00 | 61.00  | 123.00 | 230.00 | 366.00  | 2.888 | 207.314 | 189.281 | 37.00 | 73.00  | 150.00 | 280.00 | 458.00  |  |
| 0.05                         | 2.693 | 0.1815312 | 0.0092496 | 1.00 | 1.20 | 77.386  | 62.132  | 20.00 | 33.00  | 59.00  | 103.00 | 158.10  | 2.888 | 87.620  | 72.199  | 23.00 | 37.00  | 66.00  | 115.00 | 180.00  |  |
| 0.05                         | 2.693 | 0.1815312 | 0.0092496 | 1.00 | 1.30 | 44.871  | 32.299  | 15.00 | 22.00  | 36.00  | 58.00  | 87.00   | 2.888 | 48.811  | 34.879  | 16.00 | 24.00  | 39.00  | 63.00  | 94.00   |  |
| 0.05                         | 2.693 | 0.1815312 | 0.0092496 | 1.00 | 1.40 | 31.407  | 20.458  | 12.00 | 17.00  | 26.00  | 40.00  | 58.00   | 2.888 | 33.862  | 22.094  | 13.00 | 18.00  | 28.00  | 43.00  | 62.00   |  |
| 0.05                         | 2.693 | 0.1815312 | 0.0092496 | 1.00 | 0.90 | 251.317 | 229.950 | 46.00 | 89.00  | 181.00 | 341.00 | 552.00  | 2.888 | 324.535 | 305.190 | 56.00 | 110.00 | 231.00 | 438.00 | 721.10  |  |
| 0.05                         | 2.693 | 0.1815312 | 0.0092496 | 1.00 | 0.80 | 94.189  | 72.927  | 28.00 | 43.00  | 73.00  | 122.00 | 192.00  | 2.888 | 114.508 | 91.574  | 32.00 | 51.00  | 88.00  | 151.00 | 232.00  |  |
| 0.05                         | 2.693 | 0.1815312 | 0.0092496 | 1.00 | 0.70 | 45.236  | 25.918  | 20.00 | 27.00  | 39.00  | 56.00  | 79.10   | 2.888 | 50.632  | 29.571  | 22.00 | 30.00  | 43.00  | 63.00  | 89.00   |  |
| 0.05                         | 2.693 | 0.1815312 | 0.0092496 | 1.00 | 0.60 | 26.606  | 10.722  | 15.00 | 19.00  | 24.00  | 32.00  | 41.00   | 2.888 | 28.769  | 11.636  | 17.00 | 21.00  | 26.00  | 34.00  | 44.00   |  |
| 0.05                         | 2.693 | 0.1815312 | 0.0092496 | 1.00 | 0.50 | 18.344  | 5.251   | 13.00 | 15.00  | 17.00  | 21.00  | 25.00   | 2.888 | 19.678  | 5.641   | 13.00 | 16.00  | 19.00  | 23.00  | 27.00   |  |
| 0.10                         | 2.990 | 0.2591099 | 0.0188559 | 1.00 | 1.00 | 370.920 | 367.800 | 44.00 | 110.00 | 258.00 | 506.00 | 849.00  | 3.164 | 500.945 | 495.139 | 60.00 | 146.00 | 350.00 | 696.00 | 1154.10 |  |
| 0.10                         | 2.990 | 0.2591099 | 0.0188559 | 1.00 | 1.10 | 173.581 | 161.606 | 27.00 | 58.00  | 124.00 | 236.25 | 387.10  | 3.164 | 220.027 | 209.401 | 31.00 | 70.00  | 156.00 | 302.00 | 501.00  |  |
| 0.10                         | 2.990 | 0.2591099 | 0.0188559 | 1.00 | 1.20 | 79.623  | 70.250  | 16.00 | 30.00  | 58.00  | 107.00 | 173.00  | 3.164 | 93.694  | 84.293  | 18.00 | 34.00  | 68.00  | 127.00 | 203.00  |  |
| 0.10                         | 2.990 | 0.2591099 | 0.0188559 | 1.00 | 1.30 | 45.847  | 37.707  | 12.00 | 19.00  | 35.00  | 61.00  | 95.00   | 3.164 | 51.259  | 42.517  | 12.00 | 21.00  | 39.00  | 68.00  | 106.00  |  |
| 0.10                         | 2.990 | 0.2591099 | 0.0188559 | 1.00 | 1.40 | 30.298  | 22.963  | 9.00  | 14.00  | 23.00  | 39.25  | 61.00   | 3.164 | 33.761  | 25.656  | 10.00 | 16.00  | 26.00  | 44.00  | 68.00   |  |
| 0.10                         | 2.990 | 0.2591099 | 0.0188559 | 1.00 | 0.90 | 346.940 | 340.682 | 46.00 | 107.00 | 242.00 | 481.00 | 776.00  | 3.164 | 488.673 | 468.377 | 64.00 | 154.00 | 347.00 | 670.00 | 1110.00 |  |
| 0.10                         | 2.990 | 0.2591099 | 0.0188559 | 1.00 | 0.80 | 169.037 | 156.036 | 30.00 | 59.00  | 122.00 | 227.00 | 372.00  | 3.164 | 225.462 | 208.710 | 37.00 | 76.00  | 163.00 | 310.00 | 499.00  |  |
| 0.10                         | 2.990 | 0.2591099 | 0.0188559 | 1.00 | 0.70 | 70.418  | 54.896  | 20.00 | 32.00  | 54.00  | 92.00  | 143.00  | 3.164 | 86.560  | 69.232  | 22.00 | 37.00  | 66.00  | 115.00 | 181.00  |  |
| 0.10                         | 2.990 | 0.2591099 | 0.0188559 | 1.00 | 0.60 | 33.804  | 20.508  | 14.00 | 20.00  | 28.00  | 42.00  | 61.00   | 3.164 | 38.798  | 24.545  | 16.00 | 22.00  | 32.00  | 48.00  | 71.00   |  |
| 0.10                         | 2.990 | 0.2591099 | 0.0188559 | 1.00 | 0.50 | 19.887  | 8.580   | 11.00 | 14.00  | 18.00  | 24.00  | 31.00   | 3.164 | 21.880  | 9.695   | 12.00 | 15.00  | 20.00  | 26.00  | 34.00   |  |
| 0.15                         | 3.108 | 0.3218169 | 0.0287890 | 1.00 | 1.00 | 370.290 | 361.407 | 44.00 | 111.00 | 261.00 | 518.00 | 842.00  | 3.276 | 499.754 | 488.871 | 59.00 | 152.00 | 352.00 | 693.25 | 1133.00 |  |
| 0.15                         | 3.108 | 0.3218169 | 0.0287890 | 1.00 | 1.10 | 174.642 | 167.151 | 23.00 | 54.00  | 126.00 | 240.00 | 391.00  | 3.276 | 220.147 | 213.211 | 29.00 | 67.00  | 157.00 | 304.00 | 498.00  |  |
| 0.15                         | 3.108 | 0.3218169 | 0.0287890 | 1.00 | 1.20 | 83.306  | 76.869  | 14.00 | 28.00  | 60.00  | 113.00 | 182.00  | 3.276 | 97.547  | 89.788  | 17.00 | 34.00  | 71.00  | 133.00 | 214.00  |  |
| 0.15                         | 3.108 | 0.3218169 | 0.0287890 | 1.00 | 1.30 | 46.473  | 40.122  | 10.00 | 18.00  | 34.00  | 63.00  | 98.00   | 3.276 | 52.500  | 46.044  | 11.00 | 20.00  | 39.00  | 70.00  | 112.00  |  |
| 0.15                         | 3.108 | 0.3218169 | 0.0287890 | 1.00 | 1.40 | 30.836  | 25.227  | 8.00  | 13.00  | 23.00  | 41.00  | 64.00   | 3.276 | 34.199  | 27.834  | 9.00  | 14.00  | 26.00  | 45.00  | 70.00   |  |
| 0.15                         | 3.108 | 0.3218169 | 0.0287890 | 1.00 | 0.90 | 428.185 | 419.826 | 52.00 | 127.00 | 299.00 | 596.25 | 975.00  | 3.276 | 594.210 | 589.853 | 70.00 | 174.00 | 417.00 | 818.00 | 1377.10 |  |
| 0.15                         | 3.108 | 0.3218169 | 0.0287890 | 1.00 | 0.80 | 270.250 | 261.620 | 38.00 | 86.00  | 191.00 | 371.00 | 601.00  | 3.276 | 391.944 | 380.832 | 49.00 | 121.00 | 275.00 | 543.00 | 887.00  |  |
| 0.15                         | 3.108 | 0.3218169 | 0.0287890 | 1.00 | 0.70 | 126.681 | 115.473 | 24.00 | 45.00  | 91.00  | 171.00 | 278.00  | 3.276 | 176.283 | 161.418 | 29.00 | 60.00  | 129.00 | 242.00 | 391.00  |  |
| 0.15                         | 3.108 | 0.3218169 | 0.0287890 | 1.00 | 0.60 | 54.769  | 43.365  | 16.00 | 24.00  | 41.00  | 72.00  | 113.00  | 3.276 | 70.217  | 57.040  | 18.00 | 30.00  | 53.00  | 94.00  | 144.00  |  |
| 0.15                         | 3.108 | 0.3218169 | 0.0287890 | 1.00 | 0.50 | 26.783  | 16.423  | 11.00 | 15.00  | 22.00  | 33.00  | 48.00   | 3.276 | 31.167  | 19.775  | 13.00 | 17.00  | 26.00  | 39.00  | 57.00   |  |
| <b>Case 3</b>                |       |           |           |      |      |         |         |       |        |        |        |         |       |         |         |       |        |        |        |         |  |
| <b><math>\phi=80</math></b>  |       |           |           |      |      |         |         |       |        |        |        |         |       |         |         |       |        |        |        |         |  |
| 0.05                         | 2.707 | 0.1806445 | 0.0092291 | 1.00 | 1.00 | 370.250 | 354.125 | 53.00 | 116.00 | 260.00 | 514.00 | 841.00  | 2.887 | 500.238 | 490.462 | 66.00 | 153.00 | 346.00 | 687.00 | 1133.00 |  |
| 0.05                         | 2.707 | 0.1806445 | 0.0092291 | 1.00 | 1.10 | 168.647 | 153.685 | 31.00 | 60.00  | 122.00 | 226.00 | 367.00  | 2.887 | 204.430 | 187.078 | 37.00 | 72.00  | 147.50 | 275.00 | 445.00  |  |
| 0.05                         | 2.707 | 0.1806445 | 0.0092291 | 1.00 | 1.20 | 75.700  | 61.421  | 20.00 | 33.00  | 57.00  | 100.00 | 154.00  | 2.887 | 86.290  | 70.783  | 22.00 | 36.00  | 66.00  | 115.00 | 178.00  |  |
| 0.05                         | 2.707 | 0.1806445 | 0.0092291 | 1.00 | 1.30 | 45.126  | 32.042  | 15.00 | 22.00  | 36.00  | 59.00  | 87.00   | 2.887 | 49.323  | 35.523  | 16.00 | 24.00  | 40.00  | 64.00  | 96.00   |  |
| 0.05                         | 2.707 | 0.1806445 | 0.0092291 | 1.00 | 1.40 | 31.235  | 20.037  | 12.00 | 17.00  | 26.00  | 40.00  | 57.00   | 2.887 | 34.130  | 21.829  | 13.00 | 18.00  | 28.50  | 44.00  | 64.00   |  |
| 0.05                         | 2.707 | 0.1806445 | 0.0092291 | 1.00 | 0.90 | 250.778 | 232.177 | 44.90 | 88.00  |        |        |         |       |         |         |       |        |        |        |         |  |

|                             |       |           |           |      |      |         |         |       |        |        |        |         |       |         |         |       |        |        |        |         |  |  |
|-----------------------------|-------|-----------|-----------|------|------|---------|---------|-------|--------|--------|--------|---------|-------|---------|---------|-------|--------|--------|--------|---------|--|--|
| 0.05                        | 2.707 | 0.1806445 | 0.0092291 | 1.00 | 0.50 | 18.439  | 5.284   | 13.00 | 15.00  | 17.00  | 21.00  | 25.00   | 2.887 | 19.458  | 5.548   | 13.00 | 15.00  | 19.00  | 22.00  | 27.00   |  |  |
| 0.10                        | 2.989 | 0.2591572 | 0.0188247 | 1.00 | 1.00 | 369.027 | 357.319 | 46.00 | 114.00 | 259.50 | 501.25 | 830.00  | 3.165 | 500.856 | 488.539 | 61.00 | 151.00 | 352.00 | 691.00 | 1156.00 |  |  |
| 0.10                        | 2.989 | 0.2591572 | 0.0188247 | 1.00 | 1.10 | 173.117 | 162.750 | 27.00 | 57.00  | 124.00 | 236.00 | 384.10  | 3.165 | 216.874 | 207.876 | 31.00 | 69.00  | 155.00 | 298.00 | 485.00  |  |  |
| 0.10                        | 2.989 | 0.2591572 | 0.0188247 | 1.00 | 1.20 | 79.220  | 70.343  | 16.00 | 30.00  | 58.00  | 106.00 | 170.00  | 3.165 | 93.319  | 82.805  | 18.00 | 34.00  | 68.00  | 127.00 | 200.00  |  |  |
| 0.10                        | 2.989 | 0.2591572 | 0.0188247 | 1.00 | 1.30 | 45.641  | 37.118  | 12.00 | 19.00  | 35.00  | 60.00  | 93.10   | 3.165 | 51.393  | 42.525  | 13.00 | 21.00  | 39.00  | 68.00  | 107.00  |  |  |
| 0.10                        | 2.989 | 0.2591572 | 0.0188247 | 1.00 | 1.40 | 30.793  | 23.242  | 9.00  | 14.00  | 24.00  | 40.00  | 61.00   | 3.165 | 34.123  | 26.732  | 10.00 | 15.00  | 26.00  | 44.00  | 69.00   |  |  |
| 0.10                        | 2.989 | 0.2591572 | 0.0188247 | 1.00 | 0.90 | 341.881 | 332.273 | 46.00 | 107.00 | 238.00 | 469.00 | 774.00  | 3.165 | 474.402 | 456.056 | 63.00 | 145.00 | 333.00 | 656.00 | 1079.10 |  |  |
| 0.10                        | 2.989 | 0.2591572 | 0.0188247 | 1.00 | 0.80 | 165.704 | 151.012 | 31.00 | 57.00  | 118.00 | 225.00 | 363.00  | 3.165 | 222.247 | 210.461 | 37.00 | 74.75  | 157.00 | 300.00 | 495.00  |  |  |
| 0.10                        | 2.989 | 0.2591572 | 0.0188247 | 1.00 | 0.70 | 70.330  | 56.082  | 20.00 | 31.00  | 54.00  | 91.00  | 143.00  | 3.165 | 86.280  | 70.194  | 23.00 | 37.00  | 66.00  | 114.00 | 177.00  |  |  |
| 0.10                        | 2.989 | 0.2591572 | 0.0188247 | 1.00 | 0.60 | 33.556  | 20.385  | 14.00 | 19.00  | 28.00  | 42.00  | 60.00   | 3.165 | 38.095  | 24.277  | 16.00 | 21.00  | 31.00  | 48.00  | 69.00   |  |  |
| 0.10                        | 2.989 | 0.2591572 | 0.0188247 | 1.00 | 0.50 | 19.904  | 8.468   | 11.00 | 14.00  | 18.00  | 24.00  | 31.00   | 3.165 | 21.694  | 9.480   | 12.00 | 15.00  | 19.00  | 26.00  | 34.00   |  |  |
| 0.15                        | 3.117 | 0.3219652 | 0.0288123 | 1.00 | 1.00 | 371.183 | 357.213 | 45.00 | 112.00 | 263.00 | 520.00 | 837.00  | 3.290 | 500.849 | 485.976 | 56.00 | 150.00 | 355.00 | 704.25 | 1155.10 |  |  |
| 0.15                        | 3.117 | 0.3219652 | 0.0288123 | 1.00 | 1.10 | 178.006 | 169.943 | 25.00 | 57.00  | 127.00 | 242.00 | 399.00  | 3.290 | 233.537 | 227.396 | 30.00 | 73.00  | 163.00 | 320.00 | 537.00  |  |  |
| 0.15                        | 3.117 | 0.3219652 | 0.0288123 | 1.00 | 1.20 | 84.678  | 77.733  | 15.00 | 29.00  | 61.00  | 115.00 | 185.00  | 3.290 | 101.443 | 95.779  | 17.00 | 35.00  | 72.00  | 137.00 | 225.00  |  |  |
| 0.15                        | 3.117 | 0.3219652 | 0.0288123 | 1.00 | 1.30 | 46.263  | 40.133  | 10.00 | 18.00  | 34.00  | 62.00  | 98.00   | 3.290 | 54.508  | 48.581  | 11.00 | 20.00  | 40.00  | 73.00  | 117.00  |  |  |
| 0.15                        | 3.117 | 0.3219652 | 0.0288123 | 1.00 | 1.40 | 31.024  | 24.944  | 8.00  | 13.00  | 24.00  | 41.00  | 65.00   | 3.290 | 34.467  | 28.773  | 9.00  | 15.00  | 26.00  | 45.00  | 71.00   |  |  |
| 0.15                        | 3.117 | 0.3219652 | 0.0288123 | 1.00 | 0.90 | 430.055 | 419.817 | 51.00 | 127.00 | 299.00 | 602.00 | 985.20  | 3.290 | 617.545 | 610.802 | 73.00 | 187.00 | 434.50 | 842.00 | 1401.30 |  |  |
| 0.15                        | 3.117 | 0.3219652 | 0.0288123 | 1.00 | 0.80 | 276.253 | 264.065 | 39.00 | 87.00  | 193.00 | 383.25 | 633.00  | 3.290 | 402.181 | 387.029 | 51.00 | 123.00 | 284.00 | 562.00 | 908.10  |  |  |
| 0.15                        | 3.117 | 0.3219652 | 0.0288123 | 1.00 | 0.70 | 129.495 | 117.825 | 24.00 | 45.00  | 92.00  | 175.25 | 285.00  | 3.290 | 180.031 | 165.997 | 29.00 | 62.00  | 129.00 | 245.00 | 401.00  |  |  |
| 0.15                        | 3.117 | 0.3219652 | 0.0288123 | 1.00 | 0.60 | 55.390  | 43.572  | 16.00 | 25.00  | 43.00  | 72.00  | 111.00  | 3.290 | 70.843  | 58.605  | 19.00 | 30.00  | 53.00  | 94.00  | 146.00  |  |  |
| 0.15                        | 3.117 | 0.3219652 | 0.0288123 | 1.00 | 0.50 | 26.945  | 16.296  | 12.00 | 15.00  | 23.00  | 34.00  | 48.00   | 3.290 | 32.152  | 20.851  | 13.00 | 17.00  | 26.00  | 40.00  | 59.00   |  |  |
| <b>Case 4</b>               |       |           |           |      |      |         |         |       |        |        |        |         |       |         |         |       |        |        |        |         |  |  |
| <b><math>\phi=31</math></b> |       |           |           |      |      |         |         |       |        |        |        |         |       |         |         |       |        |        |        |         |  |  |
| 0.05                        | 2.704 | 0.1807397 | 0.0092360 | 1.00 | 1.00 | 370.385 | 354.100 | 54.00 | 122.00 | 260.00 | 510.00 | 825.00  | 2.898 | 500.880 | 489.431 | 70.00 | 153.00 | 350.00 | 693.00 | 1138.00 |  |  |
| 0.05                        | 2.704 | 0.1807397 | 0.0092360 | 1.00 | 1.10 | 166.589 | 150.246 | 32.00 | 59.00  | 121.00 | 224.00 | 361.00  | 2.898 | 206.824 | 189.700 | 37.00 | 72.00  | 149.00 | 279.00 | 452.00  |  |  |
| 0.05                        | 2.704 | 0.1807397 | 0.0092360 | 1.00 | 1.20 | 75.854  | 60.909  | 20.00 | 33.00  | 58.00  | 99.25  | 155.10  | 2.898 | 86.082  | 70.042  | 22.00 | 37.00  | 65.00  | 114.00 | 180.00  |  |  |
| 0.05                        | 2.704 | 0.1807397 | 0.0092360 | 1.00 | 1.30 | 44.554  | 31.411  | 15.00 | 22.00  | 36.00  | 57.00  | 86.00   | 2.898 | 49.126  | 35.245  | 16.00 | 24.00  | 39.00  | 64.00  | 94.00   |  |  |
| 0.05                        | 2.704 | 0.1807397 | 0.0092360 | 1.00 | 1.40 | 31.540  | 20.680  | 12.00 | 17.00  | 26.00  | 40.00  | 58.10   | 2.898 | 34.050  | 21.862  | 13.00 | 19.00  | 28.00  | 44.00  | 63.00   |  |  |
| 0.05                        | 2.704 | 0.1807397 | 0.0092360 | 1.00 | 0.90 | 246.937 | 223.137 | 45.00 | 86.00  | 176.50 | 338.00 | 557.00  | 2.898 | 327.250 | 305.652 | 55.90 | 111.00 | 232.00 | 448.00 | 729.00  |  |  |
| 0.05                        | 2.704 | 0.1807397 | 0.0092360 | 1.00 | 0.80 | 95.207  | 71.562  | 29.00 | 44.75  | 74.00  | 124.00 | 188.00  | 2.898 | 114.346 | 90.344  | 32.00 | 51.00  | 88.00  | 151.00 | 230.10  |  |  |
| 0.05                        | 2.704 | 0.1807397 | 0.0092360 | 1.00 | 0.70 | 44.626  | 25.188  | 20.00 | 27.00  | 38.00  | 55.00  | 78.00   | 2.898 | 50.044  | 28.657  | 22.00 | 30.00  | 43.00  | 62.00  | 88.00   |  |  |
| 0.05                        | 2.704 | 0.1807397 | 0.0092360 | 1.00 | 0.60 | 26.557  | 10.719  | 15.00 | 19.00  | 24.00  | 32.00  | 40.00   | 2.898 | 28.719  | 11.648  | 17.00 | 20.00  | 26.00  | 34.00  | 44.00   |  |  |
| 0.05                        | 2.704 | 0.1807397 | 0.0092360 | 1.00 | 0.50 | 18.425  | 5.239   | 13.00 | 15.00  | 18.00  | 21.00  | 25.00   | 2.898 | 19.593  | 5.500   | 14.00 | 16.00  | 19.00  | 23.00  | 27.00   |  |  |
| 0.10                        | 2.992 | 0.2594297 | 0.0188990 | 1.00 | 1.00 | 370.380 | 364.296 | 47.00 | 115.00 | 259.00 | 502.25 | 829.10  | 3.165 | 500.219 | 494.183 | 61.00 | 154.00 | 346.00 | 682.25 | 1143.00 |  |  |
| 0.10                        | 2.992 | 0.2594297 | 0.0188990 | 1.00 | 1.10 | 173.276 | 165.377 | 27.00 | 56.00  | 123.00 | 237.00 | 385.00  | 3.165 | 218.349 | 209.227 | 32.00 | 69.00  | 154.00 | 300.00 | 487.00  |  |  |
| 0.10                        | 2.992 | 0.2594297 | 0.0188990 | 1.00 | 1.20 | 79.822  | 70.654  | 16.00 | 29.00  | 58.00  | 107.00 | 174.00  | 3.165 | 92.967  | 83.300  | 18.00 | 34.00  | 68.00  | 126.00 | 202.00  |  |  |
| 0.10                        | 2.992 | 0.2594297 | 0.0188990 | 1.00 | 1.30 | 45.827  | 38.153  | 12.00 | 19.00  | 34.00  | 61.00  | 96.00   | 3.165 | 51.756  | 42.732  | 12.00 | 21.00  | 39.00  | 69.00  | 108.00  |  |  |
| 0.10                        | 2.992 | 0.2594297 | 0.0188990 | 1.00 | 1.40 | 30.557  | 23.351  | 9.00  | 14.00  | 24.00  | 40.00  | 61.00   | 3.165 | 33.474  | 25.613  | 10.00 | 16.00  | 26.00  | 44.00  | 67.00   |  |  |
| 0.10                        | 2.992 | 0.2594297 | 0.0188990 | 1.00 | 0.90 | 353.205 | 341.471 | 47.00 | 110.00 | 251.00 | 486.00 | 795.00  | 3.165 | 474.838 | 468.176 | 63.00 | 146.00 | 330.00 | 650.00 | 1075.00 |  |  |
| 0.10                        | 2.992 | 0.2594297 | 0.0188990 | 1.00 | 0.80 | 168.913 | 152.398 | 31.00 | 60.00  | 124.00 | 227.00 | 368.00  | 3.165 | 224.035 | 205.923 | 38.00 | 76.00  | 164.00 | 305.00 | 494.00  |  |  |
| 0.10                        | 2.992 | 0.2594297 | 0.0188990 | 1.00 | 0.70 | 70.933  | 55.875  | 20.00 | 32.00  | 54.00  | 93.00  | 146.00  | 3.165 | 86.781  | 71.401  | 22.00 | 36.00  | 65.00  | 114.00 | 180.00  |  |  |
| 0.10                        | 2.992 | 0.2594297 | 0.0188990 | 1.00 | 0.60 | 34.087  | 20.934  | 14.00 | 20.00  | 28.00  | 43.00  | 61.00   | 3.165 | 39.117  | 24.682  | 16.00 | 22.00  | 32.00  | 49.00  | 71.00   |  |  |
| 0.10                        | 2.992 | 0.2594297 | 0.0188990 | 1.00 | 0.50 | 19.970  | 8.470   | 11.00 | 14.00  | 18.00  | 24.00  | 31.00   | 3.165 | 21.881  | 9.615   | 12.00 | 15.00  | 20.00  | 26.00  | 34.00   |  |  |
| 0.15                        | 3.138 | 0.3220597 | 0.0288483 | 1.00 | 1.00 | 370.275 | 362.434 | 43.00 | 111.00 | 257.00 | 512.00 | 847.10  | 3.299 | 500.151 | 491.222 | 58.00 | 144.00 | 352.00 | 692.00 | 1141.00 |  |  |
| 0.15                        | 3.138 | 0.3220597 | 0.0288483 | 1.00 | 1.10 | 182.615 | 177.598 | 24.00 | 57.00  | 127.00 | 249.00 | 411.00  | 3.299 | 230.771 | 222.401 | 30.00 | 71.00  | 161.00 | 321.00 | 525.00  |  |  |
| 0.15                        | 3.138 | 0.3220597 | 0.0288483 | 1.00 | 1.20 | 85.265  | 80.048  | 15.00 | 29.00  | 61.00  | 116.00 | 188.00  | 3.299 | 101.997 | 95.256  | 17.00 | 34.00  | 72.00  | 140.00 | 230.00  |  |  |
| 0.15                        | 3.138 | 0.3220597 | 0.0288483 | 1.00 | 1.30 | 47.662  | 41.597  | 10.00 | 18.00  | 35.00  | 64.00  | 101.00  | 3.299 | 54.464  | 48.325  | 11.00 | 20.00  | 40.00  | 74.00  | 116.10  |  |  |
| 0.15                        | 3.138 | 0.3220597 | 0.0288483 | 1.00 | 1.40 | 31.571  | 25.521  | 8.00  | 13.00  | 24.00  | 42.00  | 66.00   | 3.299 | 34.583  | 28.305  | 9.00  | 15.00  | 27.00  | 45.00  | 72.00   |  |  |
| 0.15                        | 3.138 | 0.3220597 | 0.0288483 | 1.00 | 0.90 | 434.174 | 432.764 | 50.00 | 128.00 | 299.50 | 597.00 | 1011.10 | 3.299 | 596.568 | 583.880 | 71.00 | 180.75 | 421.50 | 825.25 | 1369.10 |  |  |
| 0.15                        | 3.138 | 0.3220597 | 0.0288483 | 1.00 | 0.80 | 284.549 | 279.243 | 38.00 | 88.75  | 199.00 | 387.00 | 639.00  | 3.299 | 396.056 | 388.110 | 50.00 | 119.00 | 275.00 | 542.25 | 901.00  |  |  |
| 0.15                        | 3.138 | 0.3220597 | 0.0288483 | 1.00 | 0.70 | 133.538 | 123.394 | 24.00 | 47.00  | 96.00  | 180.00 | 292.00  | 3.299 | 182.851 | 172.556 | 30.00 | 61.00  | 129.00 | 249.00 | 407.10  |  |  |
| 0.15                        | 3.138 | 0.3220597 | 0.0288483 | 1.00 | 0.60 | 57.734  | 45.486  | 16.00 | 25.00  | 44.00  | 76.00  | 119.00  | 3.299 | 72.603  | 60.034  | 18.00 | 30.00  | 54.00  | 97.00  | 153.00  |  |  |
| 0.15                        | 3.138 | 0.3220597 | 0.0288483 | 1.00 | 0.50 | 27.705  | 16.855  | 12.00 | 16.00  | 23.00  | 35.00  | 50.00   | 3.299 | 32.327  | 20.947  | 13.00 | 18.00  | 26.00  | 41.00  | 60.00   |  |  |

TABLE S.10. ARL Results of the Max-EWMA control chart when simultaneous shift occurs in the shape2 parameter of beta distribution and shape parameter of UNH distribution ( $\Delta_\delta \in (1.0, 1.1, 1.2, 1.3, 1.4, 0.9, 0.8, 0.7, 0.6, 0.5)$ ,  $\Delta_\alpha \in (1.0, 1.1, 1.2, 1.3, 1.4, 0.9, 0.8, 0.7, 0.6, 0.5)$  when  $X \sim B(\gamma, \delta)$ ,  $T \sim UNH(\alpha, \lambda)$ ,  $\mu = 0.20$ ,  $\alpha_0 = 1.50$ ,  $\lambda_0 = 1.00$   $ARL_0 \in (370, 500)$  and  $\theta_e \in (0.05, 0.10, 0.15)$

| $\theta_e$           | $K$   | $EM$      | $VM$      | $\Delta_\delta$ | $\Delta_\alpha$ | $ARL$   | $SDRL$  | $q10$ | $q25$  | $q50$  | $q75$  | $q90$  | $K$           | $ARL$   | $SDRL$  | $q10$ | $q25$  | $q50$  | $q75$  | $q90$   |
|----------------------|-------|-----------|-----------|-----------------|-----------------|---------|---------|-------|--------|--------|--------|--------|---------------|---------|---------|-------|--------|--------|--------|---------|
| Case 1<br>$\phi=290$ |       |           |           |                 |                 |         |         |       |        |        |        |        | $ARL_0 = 500$ |         |         |       |        |        |        |         |
| 0.05                 | 2.687 | 0.1808245 | 0.0092612 | 1.00            | 1.00            | 370.888 | 356.335 | 53.00 | 116.00 | 262.00 | 504.00 | 844.00 | 2.887         | 500.295 | 477.988 | 65.00 | 155.00 | 354.00 | 687.25 | 1131.10 |
| 0.05                 | 2.687 | 0.1808245 | 0.0092612 | 1.10            | 1.10            | 21.737  | 10.003  | 11.00 | 15.00  | 20.00  | 26.00  | 35.00  | 2.887         | 23.390  | 10.790  | 12.00 | 16.00  | 21.00  | 29.00  | 38.00   |
| 0.05                 | 2.687 | 0.1808245 | 0.0092612 | 1.20            | 1.10            | 9.895   | 2.879   | 7.00  | 8.00   | 9.00   | 12.00  | 14.00  | 2.887         | 10.345  | 2.937   | 7.00  | 8.00   | 10.00  | 12.00  | 14.00   |
| 0.05                 | 2.687 | 0.1808245 | 0.0092612 | 1.30            | 1.10            | 6.656   | 1.485   | 5.00  | 6.00   | 6.00   | 8.00   | 9.00   | 2.887         | 7.003   | 1.552   | 5.00  | 6.00   | 7.00   | 8.00   | 9.00    |
| 0.05                 | 2.687 | 0.1808245 | 0.0092612 | 1.40            | 1.10            | 5.233   | 0.991   | 4.00  | 5.00   | 5.00   | 6.00   | 7.00   | 2.887         | 5.459   | 1.010   | 4.00  | 5.00   | 5.00   | 6.00   | 7.00    |
| 0.05                 | 2.687 | 0.1808245 | 0.0092612 | 0.90            | 1.10            | 17.523  | 8.124   | 9.00  | 12.00  | 16.00  | 21.00  | 28.00  | 2.887         | 18.828  | 8.748   | 10.00 | 13.00  | 17.00  | 23.00  | 30.00   |
| 0.05                 | 2.687 | 0.1808245 | 0.0092612 | 0.80            | 1.10            | 6.903   | 2.142   | 4.00  | 5.00   | 7.00   | 8.00   | 10.00  | 2.887         | 7.259   | 2.256   | 5.00  | 6.00   | 7.00   | 9.00   | 10.00   |
| 0.05                 | 2.687 | 0.1808245 | 0.0092612 | 0.70            | 1.10            | 4.105   | 1.017   | 3.00  | 3.00   | 4.00   | 5.00   | 5.00   | 2.887         | 4.280   | 1.054   | 3.00  | 4.00   | 4.00   | 5.00   | 6.00    |
| 0.05                 | 2.687 | 0.1808245 | 0.0092612 | 0.60            | 1.10            | 2.834   | 0.646   | 2.00  | 2.00   | 3.00   | 3.00   | 4.00   | 2.887         | 2.935   | 0.656   | 2.00  | 3.00   | 3.00   | 3.00   | 4.00    |
| 0.05                 | 2.687 | 0.1808245 | 0.0092612 | 0.50            | 1.10            | 2.104   | 0.379   | 2.00  | 2.00   | 2.00   | 2.00   | 3.00   | 2.887         | 2.174   | 0.415   | 2.00  | 2.00   | 2.00   | 2.00   | 3.00    |
| 0.05                 | 2.687 | 0.1808245 | 0.0092612 | 1.10            | 1.20            | 20.871  | 9.487   | 11.00 | 14.00  | 19.00  | 25.00  | 33.00  | 2.887         | 22.779  | 10.374  | 12.00 | 15.00  | 21.00  | 28.00  | 37.00   |
| 0.05                 | 2.687 | 0.1808245 | 0.0092612 | 1.20            | 1.20            | 9.849   | 2.906   | 7.00  | 8.00   | 9.00   | 11.00  | 14.00  | 2.887         | 10.306  | 2.951   | 7.00  | 8.00   | 10.00  | 12.00  | 14.00   |
| 0.05                 | 2.687 | 0.1808245 | 0.0092612 | 1.30            | 1.20            | 6.643   | 1.494   | 5.00  | 6.00   | 6.00   | 7.00   | 9.00   | 2.887         | 6.970   | 1.538   | 5.00  | 6.00   | 7.00   | 8.00   | 9.00    |
| 0.05                 | 2.687 | 0.1808245 | 0.0092612 | 1.40            | 1.20            | 5.256   | 0.995   | 4.00  | 5.00   | 5.00   | 6.00   | 7.00   | 2.887         | 5.468   | 1.019   | 4.00  | 5.00   | 5.00   | 6.00   | 7.00    |
| 0.05                 | 2.687 | 0.1808245 | 0.0092612 | 0.90            | 1.20            | 17.086  | 7.898   | 9.00  | 12.00  | 16.00  | 21.00  | 27.00  | 2.887         | 18.218  | 8.358   | 9.00  | 12.00  | 17.00  | 22.00  | 29.00   |
| 0.05                 | 2.687 | 0.1808245 | 0.0092612 | 0.80            | 1.20            | 6.901   | 2.127   | 4.00  | 5.00   | 7.00   | 8.00   | 10.00  | 2.887         | 7.226   | 2.187   | 5.00  | 6.00   | 7.00   | 8.00   | 10.00   |
| 0.05                 | 2.687 | 0.1808245 | 0.0092612 | 0.70            | 1.20            | 4.093   | 1.024   | 3.00  | 3.00   | 4.00   | 5.00   | 5.00   | 2.887         | 4.268   | 1.047   | 3.00  | 4.00   | 4.00   | 5.00   | 6.00    |
| 0.05                 | 2.687 | 0.1808245 | 0.0092612 | 0.60            | 1.20            | 2.819   | 0.650   | 2.00  | 2.00   | 3.00   | 3.00   | 4.00   | 2.887         | 2.929   | 0.647   | 2.00  | 3.00   | 3.00   | 3.00   | 4.00    |
| 0.05                 | 2.687 | 0.1808245 | 0.0092612 | 0.50            | 1.20            | 2.115   | 0.392   | 2.00  | 2.00   | 2.00   | 2.00   | 3.00   | 2.887         | 2.166   | 0.409   | 2.00  | 2.00   | 2.00   | 2.00   | 3.00    |
| 0.05                 | 2.687 | 0.1808245 | 0.0092612 | 1.10            | 1.30            | 19.676  | 8.788   | 10.00 | 13.00  | 18.00  | 24.00  | 31.00  | 2.887         | 21.145  | 9.416   | 11.00 | 14.00  | 19.00  | 26.00  | 34.00   |
| 0.05                 | 2.687 | 0.1808245 | 0.0092612 | 1.20            | 1.30            | 9.822   | 2.841   | 7.00  | 8.00   | 9.00   | 11.00  | 14.00  | 2.887         | 10.282  | 2.934   | 7.00  | 8.00   | 10.00  | 12.00  | 14.00   |
| 0.05                 | 2.687 | 0.1808245 | 0.0092612 | 1.30            | 1.30            | 6.677   | 1.510   | 5.00  | 6.00   | 7.00   | 8.00   | 9.00   | 2.887         | 7.003   | 1.555   | 5.00  | 6.00   | 7.00   | 8.00   | 9.00    |
| 0.05                 | 2.687 | 0.1808245 | 0.0092612 | 1.40            | 1.30            | 5.247   | 0.975   | 4.00  | 5.00   | 5.00   | 6.00   | 6.00   | 2.887         | 5.479   | 1.012   | 4.00  | 5.00   | 5.00   | 6.00   | 7.00    |
| 0.05                 | 2.687 | 0.1808245 | 0.0092612 | 0.90            | 1.30            | 16.297  | 7.148   | 9.00  | 11.00  | 15.00  | 20.00  | 26.00  | 2.887         | 17.538  | 7.715   | 9.00  | 12.00  | 16.00  | 22.00  | 28.00   |
| 0.05                 | 2.687 | 0.1808245 | 0.0092612 | 0.80            | 1.30            | 6.931   | 2.139   | 4.00  | 5.00   | 7.00   | 8.00   | 10.00  | 2.887         | 7.225   | 2.197   | 5.00  | 6.00   | 7.00   | 9.00   | 10.00   |
| 0.05                 | 2.687 | 0.1808245 | 0.0092612 | 0.70            | 1.30            | 4.084   | 1.024   | 3.00  | 3.00   | 4.00   | 5.00   | 5.00   | 2.887         | 4.254   | 1.044   | 3.00  | 4.00   | 4.00   | 5.00   | 6.00    |
| 0.05                 | 2.687 | 0.1808245 | 0.0092612 | 0.60            | 1.30            | 2.831   | 0.652   | 2.00  | 2.00   | 3.00   | 3.00   | 4.00   | 2.887         | 2.945   | 0.665   | 2.00  | 3.00   | 3.00   | 3.00   | 4.00    |
| 0.05                 | 2.687 | 0.1808245 | 0.0092612 | 0.50            | 1.30            | 2.115   | 0.393   | 2.00  | 2.00   | 2.00   | 2.00   | 3.00   | 2.887         | 2.168   | 0.412   | 2.00  | 2.00   | 2.00   | 2.00   | 3.00    |
| 0.05                 | 2.687 | 0.1808245 | 0.0092612 | 1.10            | 1.40            | 18.060  | 7.837   | 10.00 | 12.00  | 17.00  | 22.00  | 29.00  | 2.887         | 19.549  | 8.394   | 11.00 | 14.00  | 18.00  | 24.00  | 31.00   |
| 0.05                 | 2.687 | 0.1808245 | 0.0092612 | 1.20            | 1.40            | 9.662   | 2.740   | 7.00  | 8.00   | 9.00   | 11.00  | 13.00  | 2.887         | 10.198  | 2.878   | 7.00  | 8.00   | 10.00  | 12.00  | 14.00   |
| 0.05                 | 2.687 | 0.1808245 | 0.0092612 | 1.30            | 1.40            | 6.641   | 1.479   | 5.00  | 6.00   | 6.00   | 7.00   | 9.00   | 2.887         | 7.000   | 1.544   | 5.00  | 6.00   | 7.00   | 8.00   | 9.00    |
| 0.05                 | 2.687 | 0.1808245 | 0.0092612 | 1.40            | 1.40            | 5.236   | 0.978   | 4.00  | 5.00   | 5.00   | 6.00   | 6.00   | 2.887         | 5.477   | 1.012   | 4.00  | 5.00   | 5.00   | 6.00   | 7.00    |
| 0.05                 | 2.687 | 0.1808245 | 0.0092612 | 0.90            | 1.40            | 15.410  | 6.678   | 8.00  | 11.00  | 14.00  | 19.00  | 24.00  | 2.887         | 16.552  | 6.979   | 9.00  | 11.00  | 15.00  | 20.00  | 26.00   |
| 0.05                 | 2.687 | 0.1808245 | 0.0092612 | 0.80            | 1.40            | 6.863   | 2.076   | 4.00  | 5.00   | 7.00   | 8.00   | 10.00  | 2.887         | 7.164   | 2.133   | 5.00  | 6.00   | 7.00   | 8.00   | 10.00   |
| 0.05                 | 2.687 | 0.1808245 | 0.0092612 | 0.70            | 1.40            | 4.119   | 1.037   | 3.00  | 3.00   | 4.00   | 5.00   | 5.00   | 2.887         | 4.249   | 1.047   | 3.00  | 4.00   | 4.00   | 5.00   | 6.00    |
| 0.05                 | 2.687 | 0.1808245 | 0.0092612 | 0.60            | 1.40            | 2.820   | 0.640   | 2.00  | 2.00   | 3.00   | 3.00   | 4.00   | 2.887         | 2.936   | 0.647   | 2.00  | 3.00   | 3.00   | 3.00   | 4.00    |
| 0.05                 | 2.687 | 0.1808245 | 0.0092612 | 0.50            | 1.40            | 2.119   | 0.385   | 2.00  | 2.00   | 2.00   | 2.00   | 3.00   | 2.887         | 2.175   | 0.419   | 2.00  | 2.00   | 2.00   | 2.00   | 3.00    |
| 0.05                 | 2.687 | 0.1808245 | 0.0092612 | 1.10            | 0.90            | 22.067  | 10.298  | 11.00 | 15.00  | 20.00  | 27.00  | 35.00  | 2.887         | 23.905  | 11.315  | 12.00 | 16.00  | 21.00  | 29.00  | 39.00   |
| 0.05                 | 2.687 | 0.1808245 | 0.0092612 | 1.20            | 0.90            | 9.864   | 2.869   | 7.00  | 8.00   | 9.00   | 11.00  | 14.00  | 2.887         | 10.423  | 3.054   | 7.00  | 8.00   | 10.00  | 12.00  | 15.00   |
| 0.05                 | 2.687 | 0.1808245 | 0.0092612 | 1.30            | 0.90            | 6.694   | 1.514   | 5.00  | 6.00   | 7.00   | 8.00   | 9.00   | 2.887         | 6.998   | 1.552   | 5.00  | 6.00   | 7.00   | 8.00   | 9.00    |
| 0.05                 | 2.687 | 0.1808245 | 0.0092612 | 1.40            | 0.90            | 5.239   | 1.003   | 4.00  | 5.00   | 5.00   | 6.00   | 7.00   | 2.887         | 5.490   | 1.013   | 4.00  | 5.00   | 5.00   | 6.00   | 7.00    |
| 0.05                 | 2.687 | 0.1808245 | 0.0092612 | 0.90            | 0.90            | 17.671  | 8.203   | 9.00  | 12.00  | 16.00  | 22.00  | 28.00  | 2.887         | 18.665  | 8.651   | 9.00  | 12.00  | 17.00  | 23.00  | 30.00   |
| 0.05                 | 2.687 | 0.1808245 | 0.0092612 | 0.80            | 0.90            | 6.890   | 2.151   | 4.00  | 5.00   | 7.00   | 8.00   | 10.00  | 2.887         | 7.267   | 2.225   | 5.00  | 6.00   | 7.00   | 9.00   | 10.00   |
| 0.05                 | 2.687 | 0.1808245 | 0.0092612 | 0.70            | 0.90            | 4.106   | 1.020   | 3.00  | 3.00   | 4.00   | 5.00   | 5.00   | 2.887         | 4.263   | 1.059   | 3.00  | 4.00   | 4.00   | 5.00   | 6.00    |
| 0.05                 | 2.687 | 0.1808245 | 0.0092612 | 0.60            | 0.90            | 2.829   | 0.648   | 2.00  | 2.00   | 3.00   | 3.00   | 4.00   | 2.887         | 2.940   | 0.645   | 2.00  | 3.00   | 3.00   | 3.00   | 4.00    |
| 0.05                 | 2.687 | 0.1808245 | 0.0092612 | 0.50            | 0.90            | 2.113   | 0.377   | 2.00  | 2.00   | 2.00   | 2.00   | 3.00   | 2.887         | 2.173   | 0.417   | 2.00  | 2.00   | 2.00   | 2.00   | 3.00    |
| 0.05                 | 2.687 | 0.1808245 | 0.0092612 | 1.10            | 0.80            | 21.916  | 10.110  | 11.00 | 15.00  | 20.00  | 27.00  | 35.00  | 2.887         | 23.359  | 10.621  | 12.00 | 16.00  | 21.00  | 28.00  | 38.00   |

|      |       |           |           |      |      |         |         |       |        |        |        |        |       |         |         |       |        |        |        |         |
|------|-------|-----------|-----------|------|------|---------|---------|-------|--------|--------|--------|--------|-------|---------|---------|-------|--------|--------|--------|---------|
| 0.05 | 2.687 | 0.1808245 | 0.0092612 | 1.20 | 0.80 | 9.851   | 2.908   | 7.00  | 8.00   | 9.00   | 11.00  | 14.00  | 2.887 | 10.363  | 2.991   | 7.00  | 8.00   | 10.00  | 12.00  | 14.00   |
| 0.05 | 2.687 | 0.1808245 | 0.0092612 | 1.30 | 0.80 | 6.700   | 1.537   | 5.00  | 6.00   | 7.00   | 8.00   | 9.00   | 2.887 | 6.988   | 1.537   | 5.00  | 6.00   | 7.00   | 8.00   | 9.00    |
| 0.05 | 2.687 | 0.1808245 | 0.0092612 | 1.40 | 0.80 | 5.230   | 0.987   | 4.00  | 5.00   | 5.00   | 6.00   | 6.00   | 2.887 | 5.484   | 1.019   | 4.00  | 5.00   | 5.00   | 6.00   | 7.00    |
| 0.05 | 2.687 | 0.1808245 | 0.0092612 | 0.90 | 0.80 | 17.633  | 8.073   | 9.00  | 12.00  | 16.00  | 22.00  | 28.00  | 2.887 | 18.739  | 8.616   | 10.00 | 13.00  | 17.00  | 23.00  | 30.00   |
| 0.05 | 2.687 | 0.1808245 | 0.0092612 | 0.80 | 0.80 | 6.908   | 2.184   | 4.00  | 5.00   | 7.00   | 8.00   | 10.00  | 2.887 | 7.230   | 2.219   | 5.00  | 6.00   | 7.00   | 9.00   | 10.00   |
| 0.05 | 2.687 | 0.1808245 | 0.0092612 | 0.70 | 0.80 | 4.093   | 1.025   | 3.00  | 3.00   | 4.00   | 5.00   | 5.00   | 2.887 | 4.271   | 1.052   | 3.00  | 4.00   | 4.00   | 5.00   | 6.00    |
| 0.05 | 2.687 | 0.1808245 | 0.0092612 | 0.60 | 0.80 | 2.827   | 0.647   | 2.00  | 2.00   | 3.00   | 3.00   | 4.00   | 2.887 | 2.938   | 0.661   | 2.00  | 3.00   | 3.00   | 3.00   | 4.00    |
| 0.05 | 2.687 | 0.1808245 | 0.0092612 | 0.50 | 0.80 | 2.116   | 0.384   | 2.00  | 2.00   | 2.00   | 2.00   | 3.00   | 2.887 | 2.174   | 0.412   | 2.00  | 2.00   | 2.00   | 2.00   | 3.00    |
| 0.05 | 2.687 | 0.1808245 | 0.0092612 | 1.10 | 0.70 | 20.735  | 8.519   | 11.00 | 15.00  | 19.00  | 25.00  | 32.00  | 2.887 | 22.253  | 9.316   | 12.00 | 16.00  | 21.00  | 27.00  | 35.00   |
| 0.05 | 2.687 | 0.1808245 | 0.0092612 | 1.20 | 0.70 | 9.872   | 2.892   | 7.00  | 8.00   | 9.00   | 11.00  | 14.00  | 2.887 | 10.414  | 3.026   | 7.00  | 8.00   | 10.00  | 12.00  | 14.00   |
| 0.05 | 2.687 | 0.1808245 | 0.0092612 | 1.30 | 0.70 | 6.689   | 1.508   | 5.00  | 6.00   | 6.00   | 8.00   | 9.00   | 2.887 | 6.992   | 1.571   | 5.00  | 6.00   | 7.00   | 8.00   | 9.00    |
| 0.05 | 2.687 | 0.1808245 | 0.0092612 | 1.40 | 0.70 | 5.249   | 0.993   | 4.00  | 5.00   | 5.00   | 6.00   | 7.00   | 2.887 | 5.481   | 1.017   | 4.00  | 5.00   | 5.00   | 6.00   | 7.00    |
| 0.05 | 2.687 | 0.1808245 | 0.0092612 | 0.90 | 0.70 | 17.020  | 7.365   | 9.00  | 12.00  | 16.00  | 21.00  | 27.00  | 2.887 | 18.185  | 7.877   | 10.00 | 13.00  | 17.00  | 22.00  | 28.00   |
| 0.05 | 2.687 | 0.1808245 | 0.0092612 | 0.80 | 0.70 | 6.874   | 2.137   | 4.00  | 5.00   | 7.00   | 8.00   | 10.00  | 2.887 | 7.233   | 2.238   | 5.00  | 6.00   | 7.00   | 8.00   | 10.00   |
| 0.05 | 2.687 | 0.1808245 | 0.0092612 | 0.70 | 0.70 | 4.094   | 1.030   | 3.00  | 3.00   | 4.00   | 5.00   | 5.00   | 2.887 | 4.261   | 1.039   | 3.00  | 4.00   | 4.00   | 5.00   | 6.00    |
| 0.05 | 2.687 | 0.1808245 | 0.0092612 | 0.60 | 0.70 | 2.829   | 0.648   | 2.00  | 2.00   | 3.00   | 3.00   | 4.00   | 2.887 | 2.924   | 0.649   | 2.00  | 3.00   | 3.00   | 3.00   | 4.00    |
| 0.05 | 2.687 | 0.1808245 | 0.0092612 | 0.50 | 0.70 | 2.112   | 0.385   | 2.00  | 2.00   | 2.00   | 2.00   | 3.00   | 2.887 | 2.166   | 0.412   | 2.00  | 2.00   | 2.00   | 2.00   | 3.00    |
| 0.05 | 2.687 | 0.1808245 | 0.0092612 | 1.10 | 0.60 | 18.633  | 6.581   | 11.00 | 14.00  | 18.00  | 22.00  | 27.00  | 2.887 | 20.033  | 7.040   | 12.00 | 15.00  | 19.00  | 24.00  | 29.00   |
| 0.05 | 2.687 | 0.1808245 | 0.0092612 | 1.20 | 0.60 | 9.783   | 2.795   | 7.00  | 8.00   | 9.00   | 11.00  | 13.00  | 2.887 | 10.407  | 2.963   | 7.00  | 8.00   | 10.00  | 12.00  | 14.00   |
| 0.05 | 2.687 | 0.1808245 | 0.0092612 | 1.30 | 0.60 | 6.686   | 1.520   | 5.00  | 6.00   | 7.00   | 8.00   | 9.00   | 2.887 | 6.966   | 1.532   | 5.00  | 6.00   | 7.00   | 8.00   | 9.00    |
| 0.05 | 2.687 | 0.1808245 | 0.0092612 | 1.40 | 0.60 | 5.232   | 0.981   | 4.00  | 5.00   | 5.00   | 6.00   | 6.00   | 2.887 | 5.480   | 1.015   | 4.00  | 5.00   | 5.00   | 6.00   | 7.00    |
| 0.05 | 2.687 | 0.1808245 | 0.0092612 | 0.90 | 0.60 | 16.066  | 6.102   | 9.00  | 12.00  | 15.00  | 20.00  | 24.00  | 2.887 | 17.034  | 6.559   | 9.00  | 12.00  | 16.00  | 21.00  | 26.00   |
| 0.05 | 2.687 | 0.1808245 | 0.0092612 | 0.80 | 0.60 | 6.893   | 2.123   | 4.00  | 5.00   | 7.00   | 8.00   | 10.00  | 2.887 | 7.245   | 2.214   | 5.00  | 6.00   | 7.00   | 8.00   | 10.00   |
| 0.05 | 2.687 | 0.1808245 | 0.0092612 | 0.70 | 0.60 | 4.100   | 1.023   | 3.00  | 3.00   | 4.00   | 5.00   | 5.00   | 2.887 | 4.282   | 1.052   | 3.00  | 4.00   | 4.00   | 5.00   | 6.00    |
| 0.05 | 2.687 | 0.1808245 | 0.0092612 | 0.60 | 0.60 | 2.828   | 0.643   | 2.00  | 2.00   | 3.00   | 3.00   | 4.00   | 2.887 | 2.940   | 0.659   | 2.00  | 3.00   | 3.00   | 3.00   | 4.00    |
| 0.05 | 2.687 | 0.1808245 | 0.0092612 | 0.50 | 0.60 | 2.104   | 0.386   | 2.00  | 2.00   | 2.00   | 2.00   | 3.00   | 2.887 | 2.162   | 0.406   | 2.00  | 2.00   | 2.00   | 2.00   | 3.00    |
| 0.05 | 2.687 | 0.1808245 | 0.0092612 | 1.10 | 0.50 | 15.930  | 4.461   | 11.00 | 13.00  | 15.00  | 18.00  | 22.00  | 2.887 | 16.920  | 4.599   | 12.00 | 14.00  | 16.00  | 20.00  | 23.00   |
| 0.05 | 2.687 | 0.1808245 | 0.0092612 | 1.20 | 0.50 | 9.715   | 2.674   | 7.00  | 8.00   | 9.00   | 11.00  | 13.00  | 2.887 | 10.231  | 2.825   | 7.00  | 8.00   | 10.00  | 12.00  | 14.00   |
| 0.05 | 2.687 | 0.1808245 | 0.0092612 | 1.30 | 0.50 | 6.667   | 1.482   | 5.00  | 6.00   | 6.00   | 8.00   | 9.00   | 2.887 | 6.989   | 1.552   | 5.00  | 6.00   | 7.00   | 8.00   | 9.00    |
| 0.05 | 2.687 | 0.1808245 | 0.0092612 | 1.40 | 0.50 | 5.234   | 0.985   | 4.00  | 5.00   | 5.00   | 6.00   | 6.00   | 2.887 | 5.479   | 1.019   | 4.00  | 5.00   | 5.00   | 6.00   | 7.00    |
| 0.05 | 2.687 | 0.1808245 | 0.0092612 | 0.90 | 0.50 | 14.214  | 4.396   | 9.00  | 11.00  | 14.00  | 17.00  | 20.00  | 2.887 | 15.231  | 4.685   | 9.00  | 12.00  | 15.00  | 18.00  | 21.00   |
| 0.05 | 2.687 | 0.1808245 | 0.0092612 | 0.80 | 0.50 | 6.915   | 2.085   | 5.00  | 5.00   | 7.00   | 8.00   | 10.00  | 2.887 | 7.222   | 2.196   | 5.00  | 6.00   | 7.00   | 8.00   | 10.00   |
| 0.05 | 2.687 | 0.1808245 | 0.0092612 | 0.70 | 0.50 | 4.080   | 1.034   | 3.00  | 3.00   | 4.00   | 5.00   | 5.00   | 2.887 | 4.271   | 1.061   | 3.00  | 4.00   | 4.00   | 5.00   | 6.00    |
| 0.05 | 2.687 | 0.1808245 | 0.0092612 | 0.60 | 0.50 | 2.825   | 0.656   | 2.00  | 2.00   | 3.00   | 3.00   | 4.00   | 2.887 | 2.930   | 0.654   | 2.00  | 3.00   | 3.00   | 3.00   | 4.00    |
| 0.05 | 2.687 | 0.1808245 | 0.0092612 | 0.50 | 0.50 | 2.119   | 0.392   | 2.00  | 2.00   | 2.00   | 2.00   | 3.00   | 2.887 | 2.174   | 0.415   | 2.00  | 2.00   | 2.00   | 2.00   | 3.00    |
| 0.10 | 2.988 | 0.2588680 | 0.0188363 | 1.00 | 1.00 | 370.462 | 359.852 | 47.00 | 113.00 | 265.00 | 514.25 | 836.00 | 3.162 | 501.280 | 486.161 | 61.90 | 152.00 | 348.00 | 695.00 | 1162.00 |
| 0.10 | 2.988 | 0.2588680 | 0.0188363 | 1.10 | 1.10 | 22.366  | 13.453  | 9.00  | 13.00  | 19.00  | 28.00  | 40.00  | 3.162 | 24.742  | 15.467  | 10.00 | 14.00  | 21.00  | 31.00  | 45.00   |
| 0.10 | 2.988 | 0.2588680 | 0.0188363 | 1.20 | 1.10 | 8.628   | 3.172   | 5.00  | 6.00   | 8.00   | 10.00  | 13.00  | 3.162 | 9.072   | 3.307   | 6.00  | 7.00   | 8.00   | 11.00  | 13.00   |
| 0.10 | 2.988 | 0.2588680 | 0.0188363 | 1.30 | 1.10 | 5.596   | 1.508   | 4.00  | 5.00   | 5.00   | 6.00   | 8.00   | 3.162 | 5.810   | 1.558   | 4.00  | 5.00   | 6.00   | 7.00   | 8.00    |
| 0.10 | 2.988 | 0.2588680 | 0.0188363 | 1.40 | 1.10 | 4.318   | 0.966   | 3.00  | 4.00   | 4.00   | 5.00   | 6.00   | 3.162 | 4.470   | 0.993   | 3.00  | 4.00   | 4.00   | 5.00   | 6.00    |
| 0.10 | 2.988 | 0.2588680 | 0.0188363 | 0.90 | 1.10 | 16.426  | 9.525   | 7.00  | 10.00  | 14.00  | 21.00  | 29.00  | 3.162 | 17.741  | 10.364  | 7.00  | 10.00  | 15.00  | 22.00  | 31.00   |
| 0.10 | 2.988 | 0.2588680 | 0.0188363 | 0.80 | 1.10 | 5.784   | 2.140   | 3.00  | 4.00   | 5.00   | 7.00   | 9.00   | 3.162 | 6.072   | 2.243   | 4.00  | 4.00   | 6.00   | 7.00   | 9.00    |
| 0.10 | 2.988 | 0.2588680 | 0.0188363 | 0.70 | 1.10 | 3.324   | 0.971   | 2.00  | 3.00   | 3.00   | 4.00   | 5.00   | 3.162 | 3.453   | 1.003   | 2.00  | 3.00   | 3.00   | 4.00   | 5.00    |
| 0.10 | 2.988 | 0.2588680 | 0.0188363 | 0.60 | 1.10 | 2.310   | 0.572   | 2.00  | 2.00   | 2.00   | 3.00   | 3.00   | 3.162 | 2.366   | 0.589   | 2.00  | 2.00   | 2.00   | 3.00   | 3.00    |
| 0.10 | 2.988 | 0.2588680 | 0.0188363 | 0.50 | 1.10 | 1.766   | 0.467   | 1.00  | 1.00   | 2.00   | 2.00   | 2.00   | 3.162 | 1.813   | 0.450   | 1.00  | 2.00   | 2.00   | 2.00   | 2.00    |
| 0.10 | 2.988 | 0.2588680 | 0.0188363 | 1.10 | 1.20 | 21.067  | 12.484  | 9.00  | 12.00  | 18.00  | 26.00  | 38.00  | 3.162 | 22.959  | 13.700  | 10.00 | 13.00  | 20.00  | 29.00  | 40.00   |
| 0.10 | 2.988 | 0.2588680 | 0.0188363 | 1.20 | 1.20 | 8.583   | 3.128   | 5.00  | 6.00   | 8.00   | 10.00  | 13.00  | 3.162 | 9.014   | 3.242   | 5.00  | 7.00   | 8.00   | 11.00  | 13.00   |
| 0.10 | 2.988 | 0.2588680 | 0.0188363 | 1.30 | 1.20 | 5.601   | 1.557   | 4.00  | 5.00   | 5.00   | 6.00   | 8.00   | 3.162 | 5.832   | 1.591   | 4.00  | 5.00   | 6.00   | 7.00   | 8.00    |
| 0.10 | 2.988 | 0.2588680 | 0.0188363 | 1.40 | 1.20 | 4.334   | 0.987   | 3.00  | 4.00   | 4.00   | 5.00   | 6.00   | 3.162 | 4.467   | 0.990   | 3.00  | 4.00   | 4.00   | 5.00   | 6.00    |
| 0.10 | 2.988 | 0.2588680 | 0.0188363 | 0.90 | 1.20 | 15.946  | 9.119   | 7.00  | 9.00   | 14.00  | 20.00  | 28.00  | 3.162 | 16.965  | 9.769   | 7.00  | 10.00  | 15.00  | 21.00  | 29.10   |
| 0.10 | 2.988 | 0.2588680 | 0.0188363 | 0.80 | 1.20 | 5.819   | 2.127   | 3.00  | 4.00   | 5.00   | 7.00   | 9.00   | 3.162 | 6.007   | 2.206   | 4.00  | 4.00   | 6.00   | 7.00   | 9.00    |
| 0.10 | 2.988 | 0.2588680 | 0.0188363 | 0.70 | 1.20 | 3.353   | 0.975   | 2.00  | 3.00   | 3.00   | 4.00   | 5.00   | 3.162 | 3.445   | 0.998   | 2.00  | 3.00   | 3.00   | 4.00   | 5.00    |
| 0.10 | 2.988 | 0.2588680 | 0.0188363 | 0.60 | 1.20 | 2.305   | 0.561   | 2.00  | 2.00   | 2.00   | 3.00   | 3.00   | 3.162 | 2.375   | 0.583   | 2.00  | 2.00   | 2.00   | 3.00   | 3.00    |
| 0.10 | 2.988 | 0.2588680 | 0.0188363 | 0.50 | 1.20 | 1.768   | 0.461   | 1.00  | 2.00   | 2.00   | 2.00   | 2.00   | 3.162 | 1.821   | 0.450   | 1.00  | 2.00   | 2.00   | 2.00   | 2.00    |
| 0.10 | 2.988 | 0.2588680 | 0.0188363 | 1.10 | 1.30 | 19.027  | 10.717  | 8.00  | 11.00  | 16.00  | 24.00  | 33.00  | 3.162 | 20.795  | 12.136  | 9.00  | 12.00  | 18.00  | 26.00  | 37.00   |
| 0.10 | 2.988 | 0.2588680 | 0.0188363 | 1.20 | 1.30 | 8.555   | 3.065   | 5.00  | 6.00   | 8.00   | 10.00  | 13.00  | 3.162 | 8.976   | 3.198   | 5.00  | 7.00   | 8.00   | 11.00  | 13.00   |
| 0.10 | 2.988 | 0.2588680 | 0.0188363 | 1.30 | 1.30 | 5.557   | 1.480   | 4.00  | 4.00   | 5.00   | 6.00   | 7.00   | 3.162 | 5.849   | 1.601   | 4.00  | 5.00   | 6.00   | 7.00   | 8.00    |
| 0.10 | 2.988 | 0.2588680 | 0.0188363 | 1.40 | 1.30 | 4.308   | 0.963   | 3.00  | 4.00   | 4.00   | 5.00   | 6.00   | 3.162 | 4.458   | 0.985   | 3.00  |        |        |        |         |

|      |       |           |           |      |      |         |         |       |        |        |        |        |       |         |         |       |        |        |        |         |
|------|-------|-----------|-----------|------|------|---------|---------|-------|--------|--------|--------|--------|-------|---------|---------|-------|--------|--------|--------|---------|
| 0.10 | 2.988 | 0.2588680 | 0.0188363 | 0.50 | 1.30 | 1.766   | 0.470   | 1.00  | 1.00   | 2.00   | 2.00   | 2.00   | 3.162 | 1.816   | 0.448   | 1.00  | 2.00   | 2.00   | 2.00   | 2.00    |
| 0.10 | 2.988 | 0.2588680 | 0.0188363 | 1.10 | 1.40 | 16.957  | 9.369   | 8.00  | 10.00  | 15.00  | 21.00  | 29.00  | 3.162 | 18.554  | 10.534  | 8.00  | 11.00  | 16.00  | 23.00  | 32.00   |
| 0.10 | 2.988 | 0.2588680 | 0.0188363 | 1.20 | 1.40 | 8.368   | 3.003   | 5.00  | 6.00   | 8.00   | 10.00  | 12.00  | 3.162 | 8.800   | 3.109   | 5.00  | 7.00   | 8.00   | 10.00  | 13.00   |
| 0.10 | 2.988 | 0.2588680 | 0.0188363 | 1.30 | 1.40 | 5.567   | 1.512   | 4.00  | 4.00   | 5.00   | 6.00   | 8.00   | 3.162 | 5.800   | 1.565   | 4.00  | 5.00   | 6.00   | 7.00   | 8.00    |
| 0.10 | 2.988 | 0.2588680 | 0.0188363 | 1.40 | 1.40 | 4.290   | 0.970   | 3.00  | 4.00   | 4.00   | 5.00   | 6.00   | 3.162 | 4.474   | 1.005   | 3.00  | 4.00   | 4.00   | 5.00   | 6.00    |
| 0.10 | 2.988 | 0.2588680 | 0.0188363 | 0.90 | 1.40 | 14.047  | 7.572   | 6.00  | 9.00   | 12.00  | 18.00  | 24.00  | 3.162 | 14.964  | 8.105   | 7.00  | 9.00   | 13.00  | 19.00  | 25.00   |
| 0.10 | 2.988 | 0.2588680 | 0.0188363 | 0.80 | 1.40 | 5.728   | 2.083   | 3.00  | 4.00   | 5.00   | 7.00   | 9.00   | 3.162 | 5.948   | 2.151   | 4.00  | 4.00   | 6.00   | 7.00   | 9.00    |
| 0.10 | 2.988 | 0.2588680 | 0.0188363 | 0.70 | 1.40 | 3.350   | 0.974   | 2.00  | 3.00   | 3.00   | 4.00   | 5.00   | 3.162 | 3.473   | 1.004   | 2.00  | 3.00   | 3.00   | 4.00   | 5.00    |
| 0.10 | 2.988 | 0.2588680 | 0.0188363 | 0.60 | 1.40 | 2.302   | 0.566   | 2.00  | 2.00   | 2.00   | 3.00   | 3.00   | 3.162 | 2.371   | 0.582   | 2.00  | 2.00   | 2.00   | 3.00   | 3.00    |
| 0.10 | 2.988 | 0.2588680 | 0.0188363 | 0.50 | 1.40 | 1.762   | 0.471   | 1.00  | 1.00   | 2.00   | 2.00   | 2.00   | 3.162 | 1.820   | 0.440   | 1.00  | 2.00   | 2.00   | 2.00   | 2.00    |
| 0.10 | 2.988 | 0.2588680 | 0.0188363 | 1.10 | 0.90 | 22.906  | 14.021  | 9.00  | 13.00  | 19.00  | 29.00  | 41.00  | 3.162 | 25.047  | 15.611  | 10.00 | 14.00  | 21.00  | 32.00  | 45.00   |
| 0.10 | 2.988 | 0.2588680 | 0.0188363 | 1.20 | 0.90 | 8.670   | 3.194   | 5.00  | 6.00   | 8.00   | 10.00  | 13.00  | 3.162 | 9.107   | 3.343   | 5.00  | 7.00   | 8.00   | 11.00  | 14.00   |
| 0.10 | 2.988 | 0.2588680 | 0.0188363 | 1.30 | 0.90 | 5.602   | 1.539   | 4.00  | 5.00   | 5.00   | 6.00   | 8.00   | 3.162 | 5.827   | 1.606   | 4.00  | 5.00   | 6.00   | 7.00   | 8.00    |
| 0.10 | 2.988 | 0.2588680 | 0.0188363 | 1.40 | 0.90 | 4.309   | 0.962   | 3.00  | 4.00   | 4.00   | 5.00   | 6.00   | 3.162 | 4.485   | 1.005   | 3.00  | 4.00   | 4.00   | 5.00   | 6.00    |
| 0.10 | 2.988 | 0.2588680 | 0.0188363 | 0.90 | 0.90 | 16.689  | 9.686   | 7.00  | 10.00  | 14.00  | 21.00  | 29.00  | 3.162 | 18.199  | 10.967  | 8.00  | 10.00  | 15.00  | 23.00  | 33.00   |
| 0.10 | 2.988 | 0.2588680 | 0.0188363 | 0.80 | 0.90 | 5.803   | 2.145   | 3.00  | 4.00   | 5.00   | 7.00   | 9.00   | 3.162 | 6.070   | 2.219   | 4.00  | 4.00   | 6.00   | 7.00   | 9.00    |
| 0.10 | 2.988 | 0.2588680 | 0.0188363 | 0.70 | 0.90 | 3.346   | 0.970   | 2.00  | 3.00   | 3.00   | 4.00   | 5.00   | 3.162 | 3.467   | 0.997   | 2.00  | 3.00   | 3.00   | 4.00   | 5.00    |
| 0.10 | 2.988 | 0.2588680 | 0.0188363 | 0.60 | 0.90 | 2.313   | 0.574   | 2.00  | 2.00   | 2.00   | 3.00   | 3.00   | 3.162 | 2.381   | 0.594   | 2.00  | 2.00   | 2.00   | 3.00   | 3.00    |
| 0.10 | 2.988 | 0.2588680 | 0.0188363 | 0.50 | 0.90 | 1.769   | 0.469   | 1.00  | 1.00   | 2.00   | 2.00   | 2.00   | 3.162 | 1.813   | 0.455   | 1.00  | 2.00   | 2.00   | 2.00   | 2.00    |
| 0.10 | 2.988 | 0.2588680 | 0.0188363 | 1.10 | 0.80 | 22.615  | 13.538  | 9.00  | 13.00  | 19.00  | 29.00  | 40.00  | 3.162 | 24.997  | 15.058  | 10.00 | 14.00  | 21.00  | 32.00  | 45.00   |
| 0.10 | 2.988 | 0.2588680 | 0.0188363 | 1.20 | 0.80 | 8.639   | 3.219   | 5.00  | 6.00   | 8.00   | 10.00  | 13.00  | 3.162 | 9.113   | 3.311   | 6.00  | 7.00   | 9.00   | 11.00  | 13.00   |
| 0.10 | 2.988 | 0.2588680 | 0.0188363 | 1.30 | 0.80 | 5.603   | 1.496   | 4.00  | 5.00   | 5.00   | 6.00   | 8.00   | 3.162 | 5.839   | 1.594   | 4.00  | 5.00   | 6.00   | 7.00   | 8.00    |
| 0.10 | 2.988 | 0.2588680 | 0.0188363 | 1.40 | 0.80 | 4.320   | 0.956   | 3.00  | 4.00   | 4.00   | 5.00   | 6.00   | 3.162 | 4.465   | 0.985   | 3.00  | 4.00   | 4.00   | 5.00   | 6.00    |
| 0.10 | 2.988 | 0.2588680 | 0.0188363 | 0.90 | 0.80 | 16.589  | 9.709   | 7.00  | 10.00  | 14.00  | 21.00  | 29.00  | 3.162 | 17.784  | 10.311  | 7.00  | 10.00  | 15.00  | 23.00  | 31.00   |
| 0.10 | 2.988 | 0.2588680 | 0.0188363 | 0.80 | 0.80 | 5.805   | 2.126   | 3.00  | 4.00   | 5.00   | 7.00   | 9.00   | 3.162 | 6.036   | 2.204   | 4.00  | 4.00   | 6.00   | 7.00   | 9.00    |
| 0.10 | 2.988 | 0.2588680 | 0.0188363 | 0.70 | 0.80 | 3.352   | 0.977   | 2.00  | 3.00   | 3.00   | 4.00   | 5.00   | 3.162 | 3.462   | 1.001   | 2.00  | 3.00   | 3.00   | 4.00   | 5.00    |
| 0.10 | 2.988 | 0.2588680 | 0.0188363 | 0.60 | 0.80 | 2.307   | 0.571   | 2.00  | 2.00   | 2.00   | 3.00   | 3.00   | 3.162 | 2.367   | 0.586   | 2.00  | 2.00   | 2.00   | 3.00   | 3.00    |
| 0.10 | 2.988 | 0.2588680 | 0.0188363 | 0.50 | 0.80 | 1.771   | 0.466   | 1.00  | 2.00   | 2.00   | 2.00   | 2.00   | 3.162 | 1.818   | 0.448   | 1.00  | 2.00   | 2.00   | 2.00   | 2.00    |
| 0.10 | 2.988 | 0.2588680 | 0.0188363 | 1.10 | 0.70 | 21.438  | 12.313  | 9.00  | 13.00  | 19.00  | 27.00  | 37.00  | 3.162 | 23.380  | 13.424  | 10.00 | 14.00  | 20.00  | 29.00  | 41.00   |
| 0.10 | 2.988 | 0.2588680 | 0.0188363 | 1.20 | 0.70 | 8.641   | 3.163   | 5.00  | 6.00   | 8.00   | 10.00  | 13.00  | 3.162 | 9.035   | 3.278   | 5.00  | 7.00   | 8.00   | 11.00  | 13.00   |
| 0.10 | 2.988 | 0.2588680 | 0.0188363 | 1.30 | 0.70 | 5.614   | 1.555   | 4.00  | 5.00   | 5.00   | 6.00   | 8.00   | 3.162 | 5.855   | 1.588   | 4.00  | 5.00   | 6.00   | 7.00   | 8.00    |
| 0.10 | 2.988 | 0.2588680 | 0.0188363 | 1.40 | 0.70 | 4.295   | 0.965   | 3.00  | 4.00   | 4.00   | 5.00   | 6.00   | 3.162 | 4.478   | 0.993   | 3.00  | 4.00   | 4.00   | 5.00   | 6.00    |
| 0.10 | 2.988 | 0.2588680 | 0.0188363 | 0.90 | 0.70 | 16.356  | 9.191   | 7.00  | 10.00  | 14.00  | 21.00  | 28.00  | 3.162 | 17.506  | 9.921   | 7.00  | 10.00  | 15.00  | 22.00  | 31.00   |
| 0.10 | 2.988 | 0.2588680 | 0.0188363 | 0.80 | 0.70 | 5.790   | 2.146   | 3.00  | 4.00   | 5.00   | 7.00   | 9.00   | 3.162 | 6.047   | 2.229   | 4.00  | 4.00   | 6.00   | 7.00   | 9.00    |
| 0.10 | 2.988 | 0.2588680 | 0.0188363 | 0.70 | 0.70 | 3.350   | 0.980   | 2.00  | 3.00   | 3.00   | 4.00   | 5.00   | 3.162 | 3.454   | 0.997   | 2.00  | 3.00   | 3.00   | 4.00   | 5.00    |
| 0.10 | 2.988 | 0.2588680 | 0.0188363 | 0.60 | 0.70 | 2.313   | 0.568   | 2.00  | 2.00   | 2.00   | 3.00   | 3.00   | 3.162 | 2.373   | 0.585   | 2.00  | 2.00   | 2.00   | 3.00   | 3.00    |
| 0.10 | 2.988 | 0.2588680 | 0.0188363 | 0.50 | 0.70 | 1.771   | 0.463   | 1.00  | 2.00   | 2.00   | 2.00   | 2.00   | 3.162 | 1.810   | 0.450   | 1.00  | 2.00   | 2.00   | 2.00   | 2.00    |
| 0.10 | 2.988 | 0.2588680 | 0.0188363 | 1.10 | 0.60 | 18.991  | 9.384   | 9.00  | 12.00  | 17.00  | 23.00  | 31.00  | 3.162 | 20.672  | 10.514  | 10.00 | 13.00  | 18.00  | 26.00  | 34.00   |
| 0.10 | 2.988 | 0.2588680 | 0.0188363 | 1.20 | 0.60 | 8.579   | 3.036   | 5.00  | 6.00   | 8.00   | 10.00  | 13.00  | 3.162 | 9.048   | 3.275   | 5.00  | 7.00   | 8.00   | 11.00  | 13.00   |
| 0.10 | 2.988 | 0.2588680 | 0.0188363 | 1.30 | 0.60 | 5.634   | 1.554   | 4.00  | 5.00   | 5.00   | 6.00   | 8.00   | 3.162 | 5.869   | 1.595   | 4.00  | 5.00   | 6.00   | 7.00   | 8.00    |
| 0.10 | 2.988 | 0.2588680 | 0.0188363 | 1.40 | 0.60 | 4.300   | 0.966   | 3.00  | 4.00   | 4.00   | 5.00   | 6.00   | 3.162 | 4.485   | 0.999   | 3.00  | 4.00   | 4.00   | 5.00   | 6.00    |
| 0.10 | 2.988 | 0.2588680 | 0.0188363 | 0.90 | 0.60 | 15.153  | 7.724   | 7.00  | 10.00  | 14.00  | 19.00  | 25.00  | 3.162 | 16.441  | 8.326   | 8.00  | 11.00  | 15.00  | 21.00  | 27.00   |
| 0.10 | 2.988 | 0.2588680 | 0.0188363 | 0.80 | 0.60 | 5.810   | 2.136   | 3.00  | 4.00   | 5.00   | 7.00   | 9.00   | 3.162 | 6.038   | 2.195   | 4.00  | 4.00   | 6.00   | 7.00   | 9.00    |
| 0.10 | 2.988 | 0.2588680 | 0.0188363 | 0.70 | 0.60 | 3.337   | 0.965   | 2.00  | 3.00   | 3.00   | 4.00   | 5.00   | 3.162 | 3.478   | 1.013   | 2.00  | 3.00   | 3.00   | 4.00   | 5.00    |
| 0.10 | 2.988 | 0.2588680 | 0.0188363 | 0.60 | 0.60 | 2.308   | 0.572   | 2.00  | 2.00   | 2.00   | 3.00   | 3.00   | 3.162 | 2.367   | 0.583   | 2.00  | 2.00   | 2.00   | 3.00   | 3.00    |
| 0.10 | 2.988 | 0.2588680 | 0.0188363 | 0.50 | 0.60 | 1.763   | 0.467   | 1.00  | 1.00   | 2.00   | 2.00   | 2.00   | 3.162 | 1.823   | 0.447   | 1.00  | 2.00   | 2.00   | 2.00   | 2.00    |
| 0.10 | 2.988 | 0.2588680 | 0.0188363 | 1.10 | 0.50 | 15.599  | 6.132   | 9.00  | 11.00  | 14.00  | 19.00  | 23.00  | 3.162 | 16.863  | 6.730   | 10.00 | 12.00  | 16.00  | 20.00  | 26.00   |
| 0.10 | 2.988 | 0.2588680 | 0.0188363 | 1.20 | 0.50 | 8.598   | 2.920   | 5.00  | 6.00   | 8.00   | 10.00  | 12.00  | 3.162 | 8.989   | 3.099   | 6.00  | 7.00   | 8.00   | 11.00  | 13.00   |
| 0.10 | 2.988 | 0.2588680 | 0.0188363 | 1.30 | 0.50 | 5.618   | 1.551   | 4.00  | 5.00   | 5.00   | 6.00   | 8.00   | 3.162 | 5.850   | 1.588   | 4.00  | 5.00   | 6.00   | 7.00   | 8.00    |
| 0.10 | 2.988 | 0.2588680 | 0.0188363 | 1.40 | 0.50 | 4.326   | 0.974   | 3.00  | 4.00   | 4.00   | 5.00   | 6.00   | 3.162 | 4.456   | 0.983   | 3.00  | 4.00   | 4.00   | 5.00   | 6.00    |
| 0.10 | 2.988 | 0.2588680 | 0.0188363 | 0.90 | 0.50 | 13.343  | 5.574   | 7.00  | 9.00   | 13.00  | 16.00  | 21.00  | 3.162 | 14.439  | 6.183   | 7.00  | 10.00  | 14.00  | 18.00  | 22.00   |
| 0.10 | 2.988 | 0.2588680 | 0.0188363 | 0.80 | 0.50 | 5.834   | 2.166   | 3.00  | 4.00   | 5.00   | 7.00   | 9.00   | 3.162 | 6.057   | 2.211   | 4.00  | 4.00   | 6.00   | 7.00   | 9.00    |
| 0.10 | 2.988 | 0.2588680 | 0.0188363 | 0.70 | 0.50 | 3.361   | 0.984   | 2.00  | 3.00   | 3.00   | 4.00   | 5.00   | 3.162 | 3.464   | 0.999   | 2.00  | 3.00   | 3.00   | 4.00   | 5.00    |
| 0.10 | 2.988 | 0.2588680 | 0.0188363 | 0.60 | 0.50 | 2.301   | 0.563   | 2.00  | 2.00   | 2.00   | 3.00   | 3.00   | 3.162 | 2.367   | 0.583   | 2.00  | 2.00   | 2.00   | 3.00   | 3.00    |
| 0.10 | 2.988 | 0.2588680 | 0.0188363 | 0.50 | 0.50 | 1.768   | 0.466   | 1.00  | 1.00   | 2.00   | 2.00   | 2.00   | 3.162 | 1.815   | 0.451   | 1.00  | 2.00   | 2.00   | 2.00   | 2.00    |
| 0.15 | 3.105 | 0.3220389 | 0.0289256 | 1.00 | 1.00 | 370.190 | 370.757 | 46.00 | 108.00 | 257.00 | 507.25 | 846.10 | 3.267 | 500.041 | 481.910 | 61.00 | 153.00 | 359.00 | 698.00 | 1120.00 |
| 0.15 | 3.105 | 0.3220389 | 0.0289256 | 1.10 | 1.10 | 25.115  | 17.964  | 8.00  | 13.00  | 20.00  | 32.00  | 49.00  | 3.267 | 27.928  | 20.151  | 9.00  | 14.00  | 22.00  | 36.00  | 55.00   |
| 0.15 | 3.105 | 0.3220389 | 0.0289256 | 1.20 | 1.10 | 8.346   | 3.650   | 5.00  | 6.00   | 8.00   | 10.00  | 13.00  | 3.267 | 8.775   | 3.753   | 5.00  | 6.00</ |        |        |         |

|      |       |           |           |      |      |        |        |      |       |       |       |       |       |        |        |      |       |       |       |       |
|------|-------|-----------|-----------|------|------|--------|--------|------|-------|-------|-------|-------|-------|--------|--------|------|-------|-------|-------|-------|
| 0.15 | 3.105 | 0.3220389 | 0.0289256 | 0.70 | 1.10 | 2.987  | 0.956  | 2.00 | 2.00  | 3.00  | 3.00  | 4.00  | 3.267 | 3.086  | 0.987  | 2.00 | 2.00  | 3.00  | 4.00  | 4.00  |
| 0.15 | 3.105 | 0.3220389 | 0.0289256 | 0.60 | 1.10 | 2.063  | 0.549  | 1.00 | 2.00  | 2.00  | 2.00  | 3.00  | 3.267 | 2.107  | 0.544  | 2.00 | 2.00  | 2.00  | 2.00  | 3.00  |
| 0.15 | 3.105 | 0.3220389 | 0.0289256 | 0.50 | 1.10 | 1.506  | 0.512  | 1.00 | 1.00  | 2.00  | 2.00  | 2.00  | 3.267 | 1.559  | 0.511  | 1.00 | 1.00  | 2.00  | 2.00  | 2.00  |
| 0.15 | 3.105 | 0.3220389 | 0.0289256 | 1.10 | 1.20 | 22.877 | 15.732 | 8.00 | 12.00 | 19.00 | 29.00 | 43.00 | 3.267 | 25.456 | 18.277 | 9.00 | 13.00 | 20.00 | 33.00 | 49.00 |
| 0.15 | 3.105 | 0.3220389 | 0.0289256 | 1.20 | 1.20 | 8.227  | 3.537  | 5.00 | 6.00  | 7.00  | 10.00 | 13.00 | 3.267 | 8.653  | 3.750  | 5.00 | 6.00  | 8.00  | 10.00 | 14.00 |
| 0.15 | 3.105 | 0.3220389 | 0.0289256 | 1.30 | 1.20 | 5.116  | 1.597  | 3.00 | 4.00  | 5.00  | 6.00  | 7.00  | 3.267 | 5.341  | 1.656  | 4.00 | 4.00  | 5.00  | 6.00  | 8.00  |
| 0.15 | 3.105 | 0.3220389 | 0.0289256 | 1.40 | 1.20 | 3.865  | 0.971  | 3.00 | 3.00  | 4.00  | 4.00  | 5.00  | 3.267 | 4.010  | 1.018  | 3.00 | 3.00  | 4.00  | 5.00  | 5.00  |
| 0.15 | 3.105 | 0.3220389 | 0.0289256 | 0.90 | 1.20 | 16.042 | 10.573 | 6.00 | 9.00  | 13.00 | 21.00 | 29.00 | 3.267 | 17.392 | 11.727 | 6.00 | 9.00  | 14.00 | 22.00 | 33.00 |
| 0.15 | 3.105 | 0.3220389 | 0.0289256 | 0.80 | 1.20 | 5.322  | 2.244  | 3.00 | 4.00  | 5.00  | 6.00  | 8.00  | 3.267 | 5.515  | 2.312  | 3.00 | 4.00  | 5.00  | 7.00  | 9.00  |
| 0.15 | 3.105 | 0.3220389 | 0.0289256 | 0.70 | 1.20 | 2.978  | 0.962  | 2.00 | 2.00  | 3.00  | 3.00  | 4.00  | 3.267 | 3.101  | 0.990  | 2.00 | 2.00  | 3.00  | 4.00  | 4.00  |
| 0.15 | 3.105 | 0.3220389 | 0.0289256 | 0.60 | 1.20 | 2.055  | 0.554  | 1.00 | 2.00  | 2.00  | 2.00  | 3.00  | 3.267 | 2.118  | 0.558  | 2.00 | 2.00  | 2.00  | 2.00  | 3.00  |
| 0.15 | 3.105 | 0.3220389 | 0.0289256 | 0.50 | 1.20 | 1.517  | 0.513  | 1.00 | 1.00  | 2.00  | 2.00  | 2.00  | 3.267 | 1.562  | 0.512  | 1.00 | 1.00  | 2.00  | 2.00  | 2.00  |
| 0.15 | 3.105 | 0.3220389 | 0.0289256 | 1.10 | 1.30 | 20.326 | 13.725 | 7.00 | 11.00 | 17.00 | 26.00 | 38.00 | 3.267 | 22.540 | 15.455 | 8.00 | 12.00 | 18.00 | 29.00 | 43.00 |
| 0.15 | 3.105 | 0.3220389 | 0.0289256 | 1.20 | 1.30 | 8.106  | 3.409  | 5.00 | 6.00  | 7.00  | 10.00 | 13.00 | 3.267 | 8.591  | 3.680  | 5.00 | 6.00  | 8.00  | 10.00 | 13.00 |
| 0.15 | 3.105 | 0.3220389 | 0.0289256 | 1.30 | 1.30 | 5.089  | 1.570  | 3.00 | 4.00  | 5.00  | 6.00  | 7.00  | 3.267 | 5.331  | 1.673  | 4.00 | 4.00  | 5.00  | 6.00  | 7.00  |
| 0.15 | 3.105 | 0.3220389 | 0.0289256 | 1.40 | 1.30 | 3.867  | 0.971  | 3.00 | 3.00  | 4.00  | 4.00  | 5.00  | 3.267 | 4.009  | 1.005  | 3.00 | 3.00  | 4.00  | 5.00  | 5.00  |
| 0.15 | 3.105 | 0.3220389 | 0.0289256 | 0.90 | 1.30 | 14.867 | 9.513  | 6.00 | 8.00  | 12.00 | 19.00 | 27.10 | 3.267 | 16.215 | 10.683 | 6.00 | 9.00  | 13.00 | 20.00 | 30.00 |
| 0.15 | 3.105 | 0.3220389 | 0.0289256 | 0.80 | 1.30 | 5.288  | 2.210  | 3.00 | 4.00  | 5.00  | 6.00  | 8.00  | 3.267 | 5.491  | 2.263  | 3.00 | 4.00  | 5.00  | 7.00  | 8.00  |
| 0.15 | 3.105 | 0.3220389 | 0.0289256 | 0.70 | 1.30 | 2.980  | 0.946  | 2.00 | 2.00  | 3.00  | 3.00  | 4.00  | 3.267 | 3.074  | 0.980  | 2.00 | 2.00  | 3.00  | 4.00  | 4.00  |
| 0.15 | 3.105 | 0.3220389 | 0.0289256 | 0.60 | 1.30 | 2.063  | 0.557  | 1.00 | 2.00  | 2.00  | 2.00  | 3.00  | 3.267 | 2.111  | 0.564  | 2.00 | 2.00  | 2.00  | 2.00  | 3.00  |
| 0.15 | 3.105 | 0.3220389 | 0.0289256 | 0.50 | 1.30 | 1.514  | 0.515  | 1.00 | 1.00  | 2.00  | 2.00  | 2.00  | 3.267 | 1.559  | 0.510  | 1.00 | 1.00  | 2.00  | 2.00  | 2.00  |
| 0.15 | 3.105 | 0.3220389 | 0.0289256 | 1.10 | 1.40 | 17.665 | 11.461 | 7.00 | 10.00 | 15.00 | 22.00 | 33.00 | 3.267 | 19.435 | 12.934 | 7.00 | 10.00 | 16.00 | 25.00 | 36.00 |
| 0.15 | 3.105 | 0.3220389 | 0.0289256 | 1.20 | 1.40 | 8.050  | 3.398  | 4.00 | 6.00  | 7.00  | 10.00 | 13.00 | 3.267 | 8.426  | 3.536  | 5.00 | 6.00  | 8.00  | 10.00 | 13.00 |
| 0.15 | 3.105 | 0.3220389 | 0.0289256 | 1.30 | 1.40 | 5.074  | 1.580  | 3.00 | 4.00  | 5.00  | 6.00  | 7.00  | 3.267 | 5.311  | 1.631  | 4.00 | 4.00  | 5.00  | 6.00  | 7.00  |
| 0.15 | 3.105 | 0.3220389 | 0.0289256 | 1.40 | 1.40 | 3.864  | 0.975  | 3.00 | 3.00  | 4.00  | 4.00  | 5.00  | 3.267 | 4.016  | 0.996  | 3.00 | 3.00  | 4.00  | 5.00  | 5.00  |
| 0.15 | 3.105 | 0.3220389 | 0.0289256 | 0.90 | 1.40 | 13.648 | 8.511  | 5.00 | 8.00  | 11.00 | 17.00 | 25.00 | 3.267 | 14.652 | 9.299  | 6.00 | 8.00  | 12.00 | 18.00 | 27.00 |
| 0.15 | 3.105 | 0.3220389 | 0.0289256 | 0.80 | 1.40 | 5.261  | 2.184  | 3.00 | 4.00  | 5.00  | 6.00  | 8.00  | 3.267 | 5.429  | 2.232  | 3.00 | 4.00  | 5.00  | 7.00  | 8.00  |
| 0.15 | 3.105 | 0.3220389 | 0.0289256 | 0.70 | 1.40 | 2.975  | 0.949  | 2.00 | 2.00  | 3.00  | 3.00  | 4.00  | 3.267 | 3.075  | 0.981  | 2.00 | 2.00  | 3.00  | 4.00  | 4.00  |
| 0.15 | 3.105 | 0.3220389 | 0.0289256 | 0.60 | 1.40 | 2.061  | 0.561  | 1.00 | 2.00  | 2.00  | 2.00  | 3.00  | 3.267 | 2.108  | 0.570  | 2.00 | 2.00  | 2.00  | 2.00  | 3.00  |
| 0.15 | 3.105 | 0.3220389 | 0.0289256 | 0.50 | 1.40 | 1.515  | 0.511  | 1.00 | 1.00  | 2.00  | 2.00  | 2.00  | 3.267 | 1.560  | 0.513  | 1.00 | 1.00  | 2.00  | 2.00  | 2.00  |
| 0.15 | 3.105 | 0.3220389 | 0.0289256 | 1.10 | 0.90 | 26.323 | 19.060 | 9.00 | 13.00 | 21.00 | 34.00 | 51.00 | 3.267 | 29.378 | 21.899 | 9.00 | 14.00 | 23.00 | 38.00 | 57.00 |
| 0.15 | 3.105 | 0.3220389 | 0.0289256 | 1.20 | 0.90 | 8.316  | 3.611  | 5.00 | 6.00  | 8.00  | 10.00 | 13.00 | 3.267 | 8.788  | 3.800  | 5.00 | 6.00  | 8.00  | 11.00 | 14.00 |
| 0.15 | 3.105 | 0.3220389 | 0.0289256 | 1.30 | 0.90 | 5.147  | 1.591  | 3.00 | 4.00  | 5.00  | 6.00  | 7.00  | 3.267 | 5.367  | 1.720  | 4.00 | 4.00  | 5.00  | 6.00  | 8.00  |
| 0.15 | 3.105 | 0.3220389 | 0.0289256 | 1.40 | 0.90 | 3.878  | 0.979  | 3.00 | 3.00  | 4.00  | 4.00  | 5.00  | 3.267 | 4.002  | 1.015  | 3.00 | 3.00  | 4.00  | 5.00  | 5.00  |
| 0.15 | 3.105 | 0.3220389 | 0.0289256 | 0.90 | 0.90 | 17.273 | 11.820 | 6.00 | 9.00  | 14.00 | 22.00 | 33.00 | 3.267 | 18.759 | 12.835 | 7.00 | 10.00 | 15.00 | 24.00 | 36.00 |
| 0.15 | 3.105 | 0.3220389 | 0.0289256 | 0.80 | 0.90 | 5.308  | 2.247  | 3.00 | 4.00  | 5.00  | 6.00  | 8.00  | 3.267 | 5.533  | 2.348  | 3.00 | 4.00  | 5.00  | 7.00  | 9.00  |
| 0.15 | 3.105 | 0.3220389 | 0.0289256 | 0.70 | 0.90 | 2.973  | 0.969  | 2.00 | 2.00  | 3.00  | 3.00  | 4.00  | 3.267 | 3.084  | 0.975  | 2.00 | 2.00  | 3.00  | 4.00  | 4.00  |
| 0.15 | 3.105 | 0.3220389 | 0.0289256 | 0.60 | 0.90 | 2.054  | 0.555  | 1.00 | 2.00  | 2.00  | 2.00  | 3.00  | 3.267 | 2.112  | 0.565  | 2.00 | 2.00  | 2.00  | 2.00  | 3.00  |
| 0.15 | 3.105 | 0.3220389 | 0.0289256 | 0.50 | 0.90 | 1.500  | 0.511  | 1.00 | 1.00  | 1.00  | 2.00  | 2.00  | 3.267 | 1.560  | 0.515  | 1.00 | 1.00  | 2.00  | 2.00  | 2.00  |
| 0.15 | 3.105 | 0.3220389 | 0.0289256 | 1.10 | 0.80 | 25.844 | 18.333 | 9.00 | 13.00 | 21.00 | 33.00 | 50.00 | 3.267 | 29.071 | 21.323 | 9.00 | 14.00 | 23.00 | 38.00 | 57.00 |
| 0.15 | 3.105 | 0.3220389 | 0.0289256 | 1.20 | 0.80 | 8.288  | 3.540  | 5.00 | 6.00  | 8.00  | 10.00 | 13.00 | 3.267 | 8.772  | 3.844  | 5.00 | 6.00  | 8.00  | 11.00 | 14.00 |
| 0.15 | 3.105 | 0.3220389 | 0.0289256 | 1.30 | 0.80 | 5.132  | 1.629  | 3.00 | 4.00  | 5.00  | 6.00  | 7.00  | 3.267 | 5.346  | 1.663  | 4.00 | 4.00  | 5.00  | 6.00  | 8.00  |
| 0.15 | 3.105 | 0.3220389 | 0.0289256 | 1.40 | 0.80 | 3.877  | 0.997  | 3.00 | 3.00  | 4.00  | 4.00  | 5.00  | 3.267 | 4.017  | 1.017  | 3.00 | 3.00  | 4.00  | 5.00  | 5.00  |
| 0.15 | 3.105 | 0.3220389 | 0.0289256 | 0.90 | 0.80 | 17.287 | 11.742 | 6.00 | 9.00  | 14.00 | 22.00 | 32.00 | 3.267 | 18.886 | 12.978 | 7.00 | 10.00 | 15.00 | 24.00 | 36.00 |
| 0.15 | 3.105 | 0.3220389 | 0.0289256 | 0.80 | 0.80 | 5.338  | 2.252  | 3.00 | 4.00  | 5.00  | 6.00  | 8.00  | 3.267 | 5.589  | 2.381  | 3.00 | 4.00  | 5.00  | 7.00  | 9.00  |
| 0.15 | 3.105 | 0.3220389 | 0.0289256 | 0.70 | 0.80 | 2.990  | 0.967  | 2.00 | 2.00  | 3.00  | 3.00  | 4.00  | 3.267 | 3.093  | 0.985  | 2.00 | 2.00  | 3.00  | 4.00  | 4.00  |
| 0.15 | 3.105 | 0.3220389 | 0.0289256 | 0.60 | 0.80 | 2.061  | 0.556  | 1.00 | 2.00  | 2.00  | 2.00  | 3.00  | 3.267 | 2.115  | 0.568  | 2.00 | 2.00  | 2.00  | 2.00  | 3.00  |
| 0.15 | 3.105 | 0.3220389 | 0.0289256 | 0.50 | 0.80 | 1.507  | 0.512  | 1.00 | 1.00  | 2.00  | 2.00  | 2.00  | 3.267 | 1.548  | 0.515  | 1.00 | 1.00  | 2.00  | 2.00  | 2.00  |
| 0.15 | 3.105 | 0.3220389 | 0.0289256 | 1.10 | 0.70 | 24.566 | 16.981 | 9.00 | 12.00 | 20.00 | 32.00 | 47.00 | 3.267 | 27.768 | 19.541 | 9.00 | 14.00 | 22.00 | 36.00 | 54.00 |
| 0.15 | 3.105 | 0.3220389 | 0.0289256 | 1.20 | 0.70 | 8.345  | 3.627  | 5.00 | 6.00  | 8.00  | 10.00 | 13.00 | 3.267 | 8.817  | 3.911  | 5.00 | 6.00  | 8.00  | 11.00 | 14.00 |
| 0.15 | 3.105 | 0.3220389 | 0.0289256 | 1.30 | 0.70 | 5.151  | 1.601  | 3.00 | 4.00  | 5.00  | 6.00  | 7.00  | 3.267 | 5.325  | 1.632  | 4.00 | 4.00  | 5.00  | 6.00  | 7.00  |
| 0.15 | 3.105 | 0.3220389 | 0.0289256 | 1.40 | 0.70 | 3.860  | 0.977  | 3.00 | 3.00  | 4.00  | 4.00  | 5.00  | 3.267 | 4.020  | 1.009  | 3.00 | 3.00  | 4.00  | 5.00  | 5.00  |
| 0.15 | 3.105 | 0.3220389 | 0.0289256 | 0.90 | 0.70 | 17.003 | 11.091 | 6.00 | 9.00  | 14.00 | 22.00 | 31.00 | 3.267 | 18.273 | 12.188 | 7.00 | 10.00 | 15.00 | 24.00 | 34.00 |
| 0.15 | 3.105 | 0.3220389 | 0.0289256 | 0.80 | 0.70 | 5.330  | 2.272  | 3.00 | 4.00  | 5.00  | 6.00  | 8.00  | 3.267 | 5.530  | 2.310  | 3.00 | 4.00  | 5.00  | 7.00  | 9.00  |
| 0.15 | 3.105 | 0.3220389 | 0.0289256 | 0.70 | 0.70 | 2.978  | 0.956  | 2.00 | 2.00  | 3.00  | 3.00  | 4.00  | 3.267 | 3.093  | 0.994  | 2.00 | 2.00  | 3.00  | 4.00  | 4.00  |
| 0.15 | 3.105 | 0.3220389 | 0.0289256 | 0.60 | 0.70 | 2.055  | 0.551  | 1.00 | 2.00  | 2.00  | 2.00  | 3.00  | 3.267 | 2.113  | 0.562  | 2.00 | 2.00  | 2.00  | 2.00  | 3.00  |
| 0.15 | 3.105 | 0.3220389 | 0.0289256 | 0.50 | 0.70 | 1.526  | 0.511  | 1.00 | 1.00  | 2.00  | 2.00  | 2.00  | 3.267 | 1.560  | 0.515  | 1.00 | 1.00  | 2.00  | 2.00  | 2.00  |
| 0.15 | 3.105 | 0.3220389 | 0.0289256 | 1.10 | 0.60 | 21.898 | 13.724 | 9.00 | 12.00 | 18.00 | 28.00 | 40.00 | 3.267 | 25.211 | 16.499 | 9.00 | 13.00 | 21.00 | 32.00 | 47.00 |

|      |       |           |           |      |      |        |       |      |       |       |       |       |       |        |        |      |       |       |       |       |
|------|-------|-----------|-----------|------|------|--------|-------|------|-------|-------|-------|-------|-------|--------|--------|------|-------|-------|-------|-------|
| 0.15 | 3.105 | 0.3220389 | 0.0289256 | 0.80 | 0.60 | 5.304  | 2.221 | 3.00 | 4.00  | 5.00  | 6.00  | 8.00  | 3.267 | 5.571  | 2.298  | 3.00 | 4.00  | 5.00  | 7.00  | 9.00  |
| 0.15 | 3.105 | 0.3220389 | 0.0289256 | 0.70 | 0.60 | 2.962  | 0.951 | 2.00 | 2.00  | 3.00  | 3.00  | 4.00  | 3.267 | 3.074  | 0.985  | 2.00 | 2.00  | 3.00  | 4.00  | 4.00  |
| 0.15 | 3.105 | 0.3220389 | 0.0289256 | 0.60 | 0.60 | 2.056  | 0.555 | 1.00 | 2.00  | 2.00  | 2.00  | 3.00  | 3.267 | 2.122  | 0.562  | 2.00 | 2.00  | 2.00  | 2.00  | 3.00  |
| 0.15 | 3.105 | 0.3220389 | 0.0289256 | 0.50 | 0.60 | 1.503  | 0.513 | 1.00 | 1.00  | 1.00  | 2.00  | 2.00  | 3.267 | 1.556  | 0.512  | 1.00 | 1.00  | 2.00  | 2.00  | 2.00  |
| 0.15 | 3.105 | 0.3220389 | 0.0289256 | 1.10 | 0.50 | 17.782 | 9.309 | 8.00 | 11.00 | 16.00 | 22.00 | 30.00 | 3.267 | 20.178 | 11.152 | 9.00 | 12.00 | 18.00 | 25.00 | 35.00 |
| 0.15 | 3.105 | 0.3220389 | 0.0289256 | 1.20 | 0.50 | 8.194  | 3.289 | 5.00 | 6.00  | 8.00  | 10.00 | 13.00 | 3.267 | 8.657  | 3.602  | 5.00 | 6.00  | 8.00  | 10.00 | 13.00 |
| 0.15 | 3.105 | 0.3220389 | 0.0289256 | 1.30 | 0.50 | 5.132  | 1.610 | 3.00 | 4.00  | 5.00  | 6.00  | 7.00  | 3.267 | 5.372  | 1.668  | 4.00 | 4.00  | 5.00  | 6.00  | 8.00  |
| 0.15 | 3.105 | 0.3220389 | 0.0289256 | 1.40 | 0.50 | 3.886  | 0.988 | 3.00 | 3.00  | 4.00  | 4.00  | 5.00  | 3.267 | 4.019  | 1.011  | 3.00 | 3.00  | 4.00  | 5.00  | 5.00  |
| 0.15 | 3.105 | 0.3220389 | 0.0289256 | 0.90 | 0.50 | 14.232 | 7.622 | 6.00 | 9.00  | 13.00 | 18.00 | 24.00 | 3.267 | 15.458 | 8.660  | 7.00 | 9.00  | 14.00 | 19.00 | 27.00 |
| 0.15 | 3.105 | 0.3220389 | 0.0289256 | 0.80 | 0.50 | 5.312  | 2.228 | 3.00 | 4.00  | 5.00  | 6.00  | 8.00  | 3.267 | 5.558  | 2.333  | 3.00 | 4.00  | 5.00  | 7.00  | 9.00  |
| 0.15 | 3.105 | 0.3220389 | 0.0289256 | 0.70 | 0.50 | 2.987  | 0.963 | 2.00 | 2.00  | 3.00  | 3.00  | 4.00  | 3.267 | 3.068  | 0.969  | 2.00 | 2.00  | 3.00  | 4.00  | 4.00  |
| 0.15 | 3.105 | 0.3220389 | 0.0289256 | 0.60 | 0.50 | 2.057  | 0.560 | 1.00 | 2.00  | 2.00  | 2.00  | 3.00  | 3.267 | 2.123  | 0.567  | 2.00 | 2.00  | 2.00  | 2.00  | 3.00  |
| 0.15 | 3.105 | 0.3220389 | 0.0289256 | 0.50 | 0.50 | 1.506  | 0.513 | 1.00 | 1.00  | 1.00  | 2.00  | 2.00  | 3.267 | 1.554  | 0.514  | 1.00 | 1.00  | 2.00  | 2.00  | 2.00  |

ARL<sub>0</sub> = 370

ARL<sub>0</sub> = 500

Case 2  
φ=148

|      |       |           |           |      |      |         |         |       |        |        |        |        |       |         |         |       |        |        |        |         |
|------|-------|-----------|-----------|------|------|---------|---------|-------|--------|--------|--------|--------|-------|---------|---------|-------|--------|--------|--------|---------|
| 0.05 | 2.693 | 0.1815312 | 0.0092496 | 1.00 | 1.00 | 371.560 | 361.955 | 52.00 | 119.00 | 260.00 | 504.25 | 837.00 | 2.888 | 500.143 | 485.266 | 68.00 | 155.00 | 351.00 | 687.00 | 1135.00 |
| 0.05 | 2.693 | 0.1815312 | 0.0092496 | 1.10 | 1.10 | 35.655  | 20.841  | 15.00 | 21.00  | 31.00  | 45.00  | 62.00  | 2.888 | 38.647  | 22.347  | 17.00 | 23.00  | 33.00  | 48.00  | 67.00   |
| 0.05 | 2.693 | 0.1815312 | 0.0092496 | 1.20 | 1.10 | 15.032  | 5.466   | 9.00  | 11.00  | 14.00  | 18.00  | 22.00  | 2.888 | 15.953  | 5.744   | 10.00 | 12.00  | 15.00  | 19.00  | 24.00   |
| 0.05 | 2.693 | 0.1815312 | 0.0092496 | 1.30 | 1.10 | 9.812   | 2.686   | 7.00  | 8.00   | 9.00   | 11.00  | 13.00  | 2.888 | 10.314  | 2.817   | 7.00  | 8.00   | 10.00  | 12.00  | 14.00   |
| 0.05 | 2.693 | 0.1815312 | 0.0092496 | 1.40 | 1.10 | 7.566   | 1.706   | 6.00  | 6.00   | 7.00   | 9.00   | 10.00  | 2.888 | 7.900   | 1.758   | 6.00  | 7.00   | 8.00   | 9.00   | 10.00   |
| 0.05 | 2.693 | 0.1815312 | 0.0092496 | 0.90 | 1.10 | 27.128  | 15.329  | 12.00 | 16.00  | 24.00  | 34.00  | 47.00  | 2.888 | 29.297  | 16.647  | 13.00 | 17.00  | 25.00  | 37.00  | 51.00   |
| 0.05 | 2.693 | 0.1815312 | 0.0092496 | 0.80 | 1.10 | 10.123  | 3.762   | 6.00  | 7.00   | 10.00  | 12.00  | 15.00  | 2.888 | 10.622  | 3.878   | 6.00  | 8.00   | 10.00  | 13.00  | 16.00   |
| 0.05 | 2.693 | 0.1815312 | 0.0092496 | 0.70 | 1.10 | 5.817   | 1.779   | 4.00  | 5.00   | 6.00   | 7.00   | 8.00   | 2.888 | 6.004   | 1.792   | 4.00  | 5.00   | 6.00   | 7.00   | 8.00    |
| 0.05 | 2.693 | 0.1815312 | 0.0092496 | 0.60 | 1.10 | 3.864   | 1.004   | 3.00  | 3.00   | 4.00   | 4.00   | 5.00   | 2.888 | 4.020   | 1.043   | 3.00  | 3.00   | 4.00   | 5.00   | 5.00    |
| 0.05 | 2.693 | 0.1815312 | 0.0092496 | 0.50 | 1.10 | 2.813   | 0.686   | 2.00  | 2.00   | 3.00   | 3.00   | 4.00   | 2.888 | 2.914   | 0.699   | 2.00  | 2.00   | 3.00   | 3.00   | 4.00    |
| 0.05 | 2.693 | 0.1815312 | 0.0092496 | 1.10 | 1.20 | 31.496  | 17.332  | 14.00 | 19.00  | 27.00  | 39.00  | 54.00  | 2.888 | 34.589  | 19.128  | 15.00 | 21.00  | 30.00  | 43.00  | 59.00   |
| 0.05 | 2.693 | 0.1815312 | 0.0092496 | 1.20 | 1.20 | 14.903  | 5.459   | 9.00  | 11.00  | 14.00  | 18.00  | 22.00  | 2.888 | 15.712  | 5.626   | 9.00  | 12.00  | 15.00  | 19.00  | 23.00   |
| 0.05 | 2.693 | 0.1815312 | 0.0092496 | 1.30 | 1.20 | 9.785   | 2.705   | 7.00  | 8.00   | 9.00   | 11.00  | 13.00  | 2.888 | 10.267  | 2.782   | 7.00  | 8.00   | 10.00  | 12.00  | 14.00   |
| 0.05 | 2.693 | 0.1815312 | 0.0092496 | 1.40 | 1.20 | 7.519   | 1.703   | 6.00  | 6.00   | 7.00   | 9.00   | 10.00  | 2.888 | 7.876   | 1.760   | 6.00  | 7.00   | 8.00   | 9.00   | 10.00   |
| 0.05 | 2.693 | 0.1815312 | 0.0092496 | 0.90 | 1.20 | 25.488  | 14.297  | 11.00 | 15.00  | 22.00  | 32.00  | 44.00  | 2.888 | 27.517  | 15.209  | 12.00 | 17.00  | 24.00  | 34.00  | 47.00   |
| 0.05 | 2.693 | 0.1815312 | 0.0092496 | 0.80 | 1.20 | 10.121  | 3.830   | 6.00  | 7.00   | 9.00   | 12.00  | 15.00  | 2.888 | 10.567  | 4.005   | 6.00  | 8.00   | 10.00  | 13.00  | 16.00   |
| 0.05 | 2.693 | 0.1815312 | 0.0092496 | 0.70 | 1.20 | 5.769   | 1.743   | 4.00  | 5.00   | 6.00   | 7.00   | 8.00   | 2.888 | 6.062   | 1.814   | 4.00  | 5.00   | 6.00   | 7.00   | 8.00    |
| 0.05 | 2.693 | 0.1815312 | 0.0092496 | 0.60 | 1.20 | 3.874   | 1.021   | 3.00  | 3.00   | 4.00   | 4.00   | 5.00   | 2.888 | 4.005   | 1.026   | 3.00  | 3.00   | 4.00   | 5.00   | 5.00    |
| 0.05 | 2.693 | 0.1815312 | 0.0092496 | 0.50 | 1.20 | 2.802   | 0.685   | 2.00  | 2.00   | 3.00   | 3.00   | 4.00   | 2.888 | 2.910   | 0.704   | 2.00  | 2.00   | 3.00   | 3.00   | 4.00    |
| 0.05 | 2.693 | 0.1815312 | 0.0092496 | 1.10 | 1.30 | 27.609  | 14.625  | 13.00 | 17.00  | 24.00  | 35.00  | 47.00  | 2.888 | 29.471  | 15.776  | 14.00 | 18.00  | 26.00  | 37.00  | 50.00   |
| 0.05 | 2.693 | 0.1815312 | 0.0092496 | 1.20 | 1.30 | 14.433  | 5.149   | 9.00  | 11.00  | 14.00  | 17.00  | 21.00  | 2.888 | 15.307  | 5.470   | 9.00  | 11.00  | 14.00  | 18.00  | 23.00   |
| 0.05 | 2.693 | 0.1815312 | 0.0092496 | 1.30 | 1.30 | 9.761   | 2.644   | 7.00  | 8.00   | 9.00   | 11.00  | 13.00  | 2.888 | 10.174  | 2.714   | 7.00  | 8.00   | 10.00  | 12.00  | 14.00   |
| 0.05 | 2.693 | 0.1815312 | 0.0092496 | 1.40 | 1.30 | 7.528   | 1.707   | 6.00  | 6.00   | 7.00   | 9.00   | 10.00  | 2.888 | 7.919   | 1.780   | 6.00  | 7.00   | 8.00   | 9.00   | 10.00   |
| 0.05 | 2.693 | 0.1815312 | 0.0092496 | 0.90 | 1.30 | 22.971  | 12.023  | 11.00 | 14.00  | 20.00  | 29.00  | 39.00  | 2.888 | 24.860  | 12.989  | 11.00 | 16.00  | 22.00  | 31.00  | 42.00   |
| 0.05 | 2.693 | 0.1815312 | 0.0092496 | 0.80 | 1.30 | 9.911   | 3.652   | 6.00  | 7.00   | 9.00   | 12.00  | 15.00  | 2.888 | 10.519  | 3.882   | 6.00  | 8.00   | 10.00  | 13.00  | 16.00   |
| 0.05 | 2.693 | 0.1815312 | 0.0092496 | 0.70 | 1.30 | 5.774   | 1.740   | 4.00  | 5.00   | 6.00   | 7.00   | 8.00   | 2.888 | 6.031   | 1.792   | 4.00  | 5.00   | 6.00   | 7.00   | 8.00    |
| 0.05 | 2.693 | 0.1815312 | 0.0092496 | 0.60 | 1.30 | 3.885   | 1.016   | 3.00  | 3.00   | 4.00   | 4.00   | 5.00   | 2.888 | 4.013   | 1.040   | 3.00  | 3.00   | 4.00   | 5.00   | 5.00    |
| 0.05 | 2.693 | 0.1815312 | 0.0092496 | 0.50 | 1.30 | 2.803   | 0.687   | 2.00  | 2.00   | 3.00   | 3.00   | 4.00   | 2.888 | 2.913   | 0.693   | 2.00  | 2.00   | 3.00   | 3.00   | 4.00    |
| 0.05 | 2.693 | 0.1815312 | 0.0092496 | 1.10 | 1.40 | 23.265  | 12.003  | 11.00 | 15.00  | 21.00  | 29.00  | 39.00  | 2.888 | 25.114  | 12.784  | 12.00 | 16.00  | 22.00  | 31.00  | 42.00   |
| 0.05 | 2.693 | 0.1815312 | 0.0092496 | 1.20 | 1.40 | 13.821  | 4.801   | 9.00  | 10.00  | 13.00  | 16.00  | 20.00  | 2.888 | 14.791  | 5.172   | 9.00  | 11.00  | 14.00  | 18.00  | 22.00   |
| 0.05 | 2.693 | 0.1815312 | 0.0092496 | 1.30 | 1.40 | 9.656   | 2.622   | 7.00  | 8.00   | 9.00   | 11.00  | 13.00  | 2.888 | 10.168  | 2.774   | 7.00  | 8.00   | 10.00  | 12.00  | 14.00   |
| 0.05 | 2.693 | 0.1815312 | 0.0092496 | 1.40 | 1.40 | 7.479   | 1.694   | 6.00  | 6.00   | 7.00   | 8.00   | 10.00  | 2.888 | 7.870   | 1.761   | 6.00  | 7.00   | 8.00   | 9.00   | 10.00   |
| 0.05 | 2.693 | 0.1815312 | 0.0092496 | 0.90 | 1.40 | 20.198  | 10.061  | 10.00 | 13.00  | 18.00  | 25.00  | 33.00  | 2.888 | 21.987  | 10.982  | 10.00 | 14.00  | 20.00  | 27.00  | 37.00   |
| 0.05 | 2.693 | 0.1815312 | 0.0092496 | 0.80 | 1.40 | 9.856   | 3.624   | 6.00  | 7.00   | 9.00   | 12.00  | 15.00  | 2.888 | 10.395  | 3.732   | 6.00  | 8.00   | 10.00  | 12.00  | 15.00   |
| 0.05 | 2.693 | 0.1815312 | 0.0092496 | 0.70 | 1.40 | 5.777   | 1.737   | 4.00  | 5.00   | 6.00   | 7.00   | 8.00   | 2.888 | 5.993   | 1.800   | 4.00  | 5.00   | 6.00   | 7.00   | 8.00    |
| 0.05 | 2.693 | 0.1815312 | 0.0092496 | 0.60 | 1.40 | 3.868   | 1.016   | 3.00  | 3.00   | 4.00   | 4.00   | 5.00   | 2.888 | 4.021   | 1.041   | 3.00  | 3.00   | 4.00   | 5.00   | 5.00    |
| 0.05 | 2.693 | 0.1815312 | 0.0092496 | 0.50 | 1.40 | 2.816   | 0.692   | 2.00  | 2.00   | 3.00   | 3.00   | 4.00   | 2.888 | 2.913   | 0.700   | 2.00  | 2.00   | 3.00   | 3.00   | 4.00    |
| 0.05 | 2.693 | 0.1815312 | 0.0092496 | 1.10 | 0.90 | 36.976  | 21.782  | 16.00 | 22.00  | 31.00  | 46.00  | 65.00  | 2.888 | 40.173  | 23.396  | 17.00 | 24.00  | 34.00  | 51.00  | 70.10   |
| 0.05 | 2.693 | 0.1815312 | 0.0092496 | 1.20 | 0.90 | 14.952  | 5.429   | 9.00  | 11.00  | 14.00  | 18.00  | 22.00  | 2.888 | 15.945  | 5.825   | 10.00 | 12.00  | 15.00  | 19.00  | 24.00   |
| 0.05 | 2.693 | 0.1815312 | 0.0092496 | 1.30 | 0.90 | 9.808   | 2.713   | 7.00  | 8.00   | 9.00   | 11.00  | 13.00  | 2.888 | 10.333  | 2.849   | 7.00  | 8.00   | 10.00  | 12.00  | 14.00   |
| 0.05 | 2.693 | 0.1815312 | 0.0092496 | 1.40 | 0.90 | 7.513   | 1.712   | 6.00  | 6.00   | 7.00   | 8.00   | 10.00  | 2.888 | 7.882   | 1.796   | 6.00  | 7.00   | 8.00   | 9.00   | 10.00   |
| 0.05 | 2.693 | 0.1815312 | 0.0092496 | 0.90 | 0.90 | 27.551  | 15.633  | 12.00 | 16.00  | 24.00  | 35.00  | 48.00  | 2.888 | 30.041  | 17.263  | 13.00 | 18.00  | 26.00  | 38.00  | 53.00   |
| 0.05 | 2.693 | 0.1815312 | 0.0092496 | 0.80 | 0.90 | 10.163  | 3.878   | 6.00  | 7.00   | 9.00   | 12.00  | 15.00  | 2.888 | 10.676  | 4.042   | 6.00  | 8.00   | 10.00  | 13.00  | 16.00   |
| 0.05 | 2.693 | 0.1815312 | 0.0092496 | 0.70 | 0.90 | 5.75    |         |       |        |        |        |        |       |         |         |       |        |        |        |         |

|      |       |           |           |      |      |         |         |       |        |        |        |        |       |         |         |       |        |        |        |         |
|------|-------|-----------|-----------|------|------|---------|---------|-------|--------|--------|--------|--------|-------|---------|---------|-------|--------|--------|--------|---------|
| 0.05 | 2.693 | 0.1815312 | 0.0092496 | 1.10 | 0.80 | 34.277  | 18.484  | 16.00 | 21.00  | 30.00  | 43.00  | 59.00  | 2.888 | 37.773  | 20.690  | 17.00 | 23.00  | 33.00  | 47.00  | 64.10   |
| 0.05 | 2.693 | 0.1815312 | 0.0092496 | 1.20 | 0.80 | 14.970  | 5.361   | 9.00  | 11.00  | 14.00  | 18.00  | 22.00  | 2.888 | 15.861  | 5.653   | 10.00 | 12.00  | 15.00  | 19.00  | 23.00   |
| 0.05 | 2.693 | 0.1815312 | 0.0092496 | 1.30 | 0.80 | 9.800   | 2.683   | 7.00  | 8.00   | 9.00   | 11.00  | 13.00  | 2.888 | 10.356  | 2.894   | 7.00  | 8.00   | 10.00  | 12.00  | 14.00   |
| 0.05 | 2.693 | 0.1815312 | 0.0092496 | 1.40 | 0.80 | 7.534   | 1.712   | 6.00  | 6.00   | 7.00   | 9.00   | 10.00  | 2.888 | 7.884   | 1.752   | 6.00  | 7.00   | 8.00   | 9.00   | 10.00   |
| 0.05 | 2.693 | 0.1815312 | 0.0092496 | 0.90 | 0.80 | 26.798  | 14.389  | 12.00 | 16.00  | 24.00  | 34.00  | 46.00  | 2.888 | 29.129  | 15.691  | 13.00 | 18.00  | 26.00  | 37.00  | 50.00   |
| 0.05 | 2.693 | 0.1815312 | 0.0092496 | 0.80 | 0.80 | 10.139  | 3.844   | 6.00  | 7.00   | 9.00   | 12.00  | 15.00  | 2.888 | 10.707  | 4.020   | 6.00  | 8.00   | 10.00  | 13.00  | 16.00   |
| 0.05 | 2.693 | 0.1815312 | 0.0092496 | 0.70 | 0.80 | 5.811   | 1.769   | 4.00  | 5.00   | 6.00   | 7.00   | 8.00   | 2.888 | 6.021   | 1.786   | 4.00  | 5.00   | 6.00   | 7.00   | 8.00    |
| 0.05 | 2.693 | 0.1815312 | 0.0092496 | 0.60 | 0.80 | 3.860   | 1.019   | 3.00  | 3.00   | 4.00   | 4.00   | 5.00   | 2.888 | 4.013   | 1.046   | 3.00  | 3.00   | 4.00   | 5.00   | 5.00    |
| 0.05 | 2.693 | 0.1815312 | 0.0092496 | 0.50 | 0.80 | 2.818   | 0.681   | 2.00  | 2.00   | 3.00   | 3.00   | 4.00   | 2.888 | 2.916   | 0.701   | 2.00  | 2.00   | 3.00   | 3.00   | 4.00    |
| 0.05 | 2.693 | 0.1815312 | 0.0092496 | 1.10 | 0.70 | 28.941  | 13.570  | 15.00 | 19.00  | 26.00  | 35.00  | 47.00  | 2.888 | 31.560  | 14.743  | 16.00 | 21.00  | 28.00  | 39.00  | 51.00   |
| 0.05 | 2.693 | 0.1815312 | 0.0092496 | 1.20 | 0.70 | 14.827  | 5.139   | 9.00  | 11.00  | 14.00  | 18.00  | 22.00  | 2.888 | 15.695  | 5.563   | 10.00 | 12.00  | 15.00  | 19.00  | 23.00   |
| 0.05 | 2.693 | 0.1815312 | 0.0092496 | 1.30 | 0.70 | 9.800   | 2.735   | 7.00  | 8.00   | 9.00   | 11.00  | 13.00  | 2.888 | 10.300  | 2.773   | 7.00  | 8.00   | 10.00  | 12.00  | 14.00   |
| 0.05 | 2.693 | 0.1815312 | 0.0092496 | 1.40 | 0.70 | 7.568   | 1.731   | 6.00  | 6.00   | 7.00   | 9.00   | 10.00  | 2.888 | 7.886   | 1.778   | 6.00  | 7.00   | 8.00   | 9.00   | 10.00   |
| 0.05 | 2.693 | 0.1815312 | 0.0092496 | 0.90 | 0.70 | 24.234  | 11.588  | 12.00 | 16.00  | 22.00  | 30.00  | 40.00  | 2.888 | 26.130  | 12.563  | 13.00 | 17.00  | 24.00  | 32.00  | 43.00   |
| 0.05 | 2.693 | 0.1815312 | 0.0092496 | 0.80 | 0.70 | 10.109  | 3.830   | 6.00  | 7.00   | 9.00   | 12.00  | 15.00  | 2.888 | 10.667  | 4.017   | 6.00  | 8.00   | 10.00  | 13.00  | 16.00   |
| 0.05 | 2.693 | 0.1815312 | 0.0092496 | 0.70 | 0.70 | 5.777   | 1.755   | 4.00  | 5.00   | 6.00   | 7.00   | 8.00   | 2.888 | 6.045   | 1.825   | 4.00  | 5.00   | 6.00   | 7.00   | 8.00    |
| 0.05 | 2.693 | 0.1815312 | 0.0092496 | 0.60 | 0.70 | 3.882   | 1.019   | 3.00  | 3.00   | 4.00   | 4.00   | 5.00   | 2.888 | 4.029   | 1.040   | 3.00  | 3.00   | 4.00   | 5.00   | 5.00    |
| 0.05 | 2.693 | 0.1815312 | 0.0092496 | 0.50 | 0.70 | 2.804   | 0.682   | 2.00  | 2.00   | 3.00   | 3.00   | 4.00   | 2.888 | 2.902   | 0.682   | 2.00  | 2.00   | 3.00   | 3.00   | 4.00    |
| 0.05 | 2.693 | 0.1815312 | 0.0092496 | 1.10 | 0.60 | 22.739  | 8.247   | 14.00 | 17.00  | 21.00  | 27.00  | 34.00  | 2.888 | 24.661  | 9.147   | 15.00 | 18.00  | 23.00  | 29.00  | 37.00   |
| 0.05 | 2.693 | 0.1815312 | 0.0092496 | 1.20 | 0.60 | 14.336  | 4.634   | 9.00  | 11.00  | 14.00  | 17.00  | 20.00  | 2.888 | 15.352  | 4.955   | 10.00 | 12.00  | 15.00  | 18.00  | 22.00   |
| 0.05 | 2.693 | 0.1815312 | 0.0092496 | 1.30 | 0.60 | 9.768   | 2.657   | 7.00  | 8.00   | 9.00   | 11.00  | 13.00  | 2.888 | 10.241  | 2.788   | 7.00  | 8.00   | 10.00  | 12.00  | 14.00   |
| 0.05 | 2.693 | 0.1815312 | 0.0092496 | 1.40 | 0.60 | 7.546   | 1.734   | 6.00  | 6.00   | 7.00   | 9.00   | 10.00  | 2.888 | 7.911   | 1.787   | 6.00  | 7.00   | 8.00   | 9.00   | 10.00   |
| 0.05 | 2.693 | 0.1815312 | 0.0092496 | 0.90 | 0.60 | 20.386  | 7.832   | 12.00 | 15.00  | 19.00  | 25.00  | 31.00  | 2.888 | 21.893  | 8.530   | 12.00 | 16.00  | 21.00  | 27.00  | 33.00   |
| 0.05 | 2.693 | 0.1815312 | 0.0092496 | 0.80 | 0.60 | 10.086  | 3.740   | 6.00  | 7.00   | 9.00   | 12.00  | 15.00  | 2.888 | 10.590  | 3.860   | 6.00  | 8.00   | 10.00  | 13.00  | 16.00   |
| 0.05 | 2.693 | 0.1815312 | 0.0092496 | 0.70 | 0.60 | 5.809   | 1.762   | 4.00  | 5.00   | 6.00   | 7.00   | 8.00   | 2.888 | 6.049   | 1.809   | 4.00  | 5.00   | 6.00   | 7.00   | 8.00    |
| 0.05 | 2.693 | 0.1815312 | 0.0092496 | 0.60 | 0.60 | 3.878   | 1.021   | 3.00  | 3.00   | 4.00   | 4.00   | 5.00   | 2.888 | 4.042   | 1.047   | 3.00  | 3.00   | 4.00   | 5.00   | 5.00    |
| 0.05 | 2.693 | 0.1815312 | 0.0092496 | 0.50 | 0.60 | 2.808   | 0.686   | 2.00  | 2.00   | 3.00   | 3.00   | 4.00   | 2.888 | 2.903   | 0.699   | 2.00  | 2.00   | 3.00   | 3.00   | 4.00    |
| 0.05 | 2.693 | 0.1815312 | 0.0092496 | 1.10 | 0.50 | 17.407  | 4.841   | 12.00 | 14.00  | 17.00  | 20.00  | 24.00  | 2.888 | 18.543  | 5.088   | 13.00 | 15.00  | 18.00  | 21.00  | 25.00   |
| 0.05 | 2.693 | 0.1815312 | 0.0092496 | 1.20 | 0.50 | 13.531  | 3.711   | 9.00  | 11.00  | 13.00  | 16.00  | 18.00  | 2.888 | 14.337  | 3.950   | 10.00 | 12.00  | 14.00  | 17.00  | 19.00   |
| 0.05 | 2.693 | 0.1815312 | 0.0092496 | 1.30 | 0.50 | 9.696   | 2.554   | 7.00  | 8.00   | 9.00   | 11.00  | 13.00  | 2.888 | 10.223  | 2.651   | 7.00  | 8.00   | 10.00  | 12.00  | 14.00   |
| 0.05 | 2.693 | 0.1815312 | 0.0092496 | 1.40 | 0.50 | 7.547   | 1.704   | 6.00  | 6.00   | 7.00   | 9.00   | 10.00  | 2.888 | 7.926   | 1.782   | 6.00  | 7.00   | 8.00   | 9.00   | 10.00   |
| 0.05 | 2.693 | 0.1815312 | 0.0092496 | 0.90 | 0.50 | 16.437  | 4.773   | 11.00 | 13.00  | 16.00  | 19.00  | 23.00  | 2.888 | 17.579  | 5.163   | 12.00 | 14.00  | 17.00  | 20.00  | 24.00   |
| 0.05 | 2.693 | 0.1815312 | 0.0092496 | 0.80 | 0.50 | 9.938   | 3.418   | 6.00  | 7.00   | 10.00  | 12.00  | 15.00  | 2.888 | 10.360  | 3.529   | 6.00  | 8.00   | 10.00  | 13.00  | 15.00   |
| 0.05 | 2.693 | 0.1815312 | 0.0092496 | 0.70 | 0.50 | 5.791   | 1.765   | 4.00  | 5.00   | 6.00   | 7.00   | 8.00   | 2.888 | 6.035   | 1.787   | 4.00  | 5.00   | 6.00   | 7.00   | 8.00    |
| 0.05 | 2.693 | 0.1815312 | 0.0092496 | 0.60 | 0.50 | 3.882   | 1.028   | 3.00  | 3.00   | 4.00   | 4.00   | 5.00   | 2.888 | 4.030   | 1.036   | 3.00  | 3.00   | 4.00   | 5.00   | 5.00    |
| 0.05 | 2.693 | 0.1815312 | 0.0092496 | 0.50 | 0.50 | 2.813   | 0.681   | 2.00  | 2.00   | 3.00   | 3.00   | 4.00   | 2.888 | 2.903   | 0.700   | 2.00  | 2.00   | 3.00   | 3.00   | 4.00    |
| 0.10 | 2.990 | 0.2591099 | 0.0188559 | 1.00 | 1.00 | 370.920 | 367.800 | 44.00 | 110.00 | 258.00 | 506.00 | 849.00 | 3.164 | 500.945 | 495.139 | 60.00 | 146.00 | 350.00 | 696.00 | 1154.10 |
| 0.10 | 2.990 | 0.2591099 | 0.0188559 | 1.10 | 1.10 | 40.961  | 30.373  | 13.00 | 20.00  | 32.00  | 53.00  | 80.00  | 3.164 | 46.192  | 34.877  | 14.00 | 22.00  | 36.00  | 61.00  | 91.00   |
| 0.10 | 2.990 | 0.2591099 | 0.0188559 | 1.20 | 1.10 | 14.200  | 6.698   | 7.00  | 9.00   | 13.00  | 17.00  | 23.00  | 3.164 | 15.225  | 7.422   | 8.00  | 10.00  | 14.00  | 19.00  | 25.00   |
| 0.10 | 2.990 | 0.2591099 | 0.0188559 | 1.30 | 1.10 | 8.627   | 2.983   | 5.00  | 6.00   | 8.00   | 10.00  | 12.00  | 3.164 | 9.045   | 3.175   | 6.00  | 7.00   | 8.00   | 11.00  | 13.00   |
| 0.10 | 2.990 | 0.2591099 | 0.0188559 | 1.40 | 1.10 | 6.410   | 1.786   | 4.00  | 5.00   | 6.00   | 7.00   | 9.00   | 3.164 | 6.676   | 1.860   | 5.00  | 5.00   | 6.00   | 8.00   | 9.00    |
| 0.10 | 2.990 | 0.2591099 | 0.0188559 | 0.90 | 1.10 | 27.657  | 19.598  | 9.00  | 14.00  | 22.00  | 36.00  | 54.00  | 3.164 | 30.406  | 21.720  | 10.00 | 15.00  | 24.00  | 39.00  | 59.00   |
| 0.10 | 2.990 | 0.2591099 | 0.0188559 | 0.80 | 1.10 | 8.807   | 4.073   | 5.00  | 6.00   | 8.00   | 11.00  | 14.00  | 3.164 | 9.291   | 4.326   | 5.00  | 6.00   | 8.00   | 11.00  | 15.00   |
| 0.10 | 2.990 | 0.2591099 | 0.0188559 | 0.70 | 1.10 | 4.790   | 1.715   | 3.00  | 4.00   | 5.00   | 6.00   | 7.00   | 3.164 | 4.989   | 1.783   | 3.00  | 4.00   | 5.00   | 6.00   | 7.00    |
| 0.10 | 2.990 | 0.2591099 | 0.0188559 | 0.60 | 1.10 | 3.162   | 0.958   | 2.00  | 3.00   | 3.00   | 4.00   | 4.00   | 3.164 | 3.277   | 0.989   | 2.00  | 3.00   | 3.00   | 4.00   | 5.00    |
| 0.10 | 2.990 | 0.2591099 | 0.0188559 | 0.50 | 1.10 | 2.287   | 0.609   | 2.00  | 2.00   | 2.00   | 3.00   | 3.00   | 3.164 | 2.365   | 0.627   | 2.00  | 2.00   | 2.00   | 3.00   | 3.00    |
| 0.10 | 2.990 | 0.2591099 | 0.0188559 | 1.10 | 1.20 | 34.742  | 24.945  | 12.00 | 17.00  | 28.00  | 44.00  | 67.00  | 3.164 | 39.029  | 28.344  | 13.00 | 19.00  | 31.00  | 50.00  | 75.00   |
| 0.10 | 2.990 | 0.2591099 | 0.0188559 | 1.20 | 1.20 | 13.715  | 6.333   | 7.00  | 9.00   | 12.00  | 17.00  | 22.00  | 3.164 | 14.772  | 7.044   | 8.00  | 10.00  | 13.00  | 18.00  | 24.00   |
| 0.10 | 2.990 | 0.2591099 | 0.0188559 | 1.30 | 1.20 | 8.558   | 2.953   | 5.00  | 6.00   | 8.00   | 10.00  | 12.00  | 3.164 | 8.953   | 3.110   | 6.00  | 7.00   | 8.00   | 11.00  | 13.00   |
| 0.10 | 2.990 | 0.2591099 | 0.0188559 | 1.40 | 1.20 | 6.378   | 1.786   | 4.00  | 5.00   | 6.00   | 7.00   | 9.00   | 3.164 | 6.692   | 1.887   | 5.00  | 5.00   | 6.00   | 8.00   | 9.00    |
| 0.10 | 2.990 | 0.2591099 | 0.0188559 | 0.90 | 1.20 | 24.892  | 16.724  | 9.00  | 13.00  | 20.00  | 32.00  | 47.00  | 3.164 | 27.598  | 19.006  | 10.00 | 14.00  | 23.00  | 35.00  | 53.00   |
| 0.10 | 2.990 | 0.2591099 | 0.0188559 | 0.80 | 1.20 | 8.752   | 3.935   | 5.00  | 6.00   | 8.00   | 11.00  | 14.00  | 3.164 | 9.175   | 4.191   | 5.00  | 6.00   | 8.00   | 11.00  | 15.00   |
| 0.10 | 2.990 | 0.2591099 | 0.0188559 | 0.70 | 1.20 | 4.754   | 1.666   | 3.00  | 4.00   | 5.00   | 6.00   | 7.00   | 3.164 | 4.964   | 1.750   | 3.00  | 4.00   | 5.00   | 6.00   | 7.00    |
| 0.10 | 2.990 | 0.2591099 | 0.0188559 | 0.60 | 1.20 | 3.165   | 0.963   | 2.00  | 3.00   | 3.00   | 4.00   | 4.00   | 3.164 | 3.271   | 0.982   | 2.00  | 3.00   | 3.00   | 4.00   | 5.00    |
| 0.10 | 2.990 | 0.2591099 | 0.0188559 | 0.50 | 1.20 | 2.308   | 0.605   | 2.00  | 2.00   | 2.00   | 3.00   | 3.00   | 3.164 | 2.361   | 0.625   | 2.00  | 2.00   | 2.00   | 3.00   | 3.00    |
| 0.10 | 2.990 | 0.2591099 | 0.0188559 | 1.10 | 1.30 | 27.995  | 19.388  | 10.00 | 15.00  | 23.00  | 36.00  | 52.00  | 3.164 | 31.254  | 21.685  | 11.00 | 16.00  | 25.00  | 40.00  | 59.00   |
| 0.10 | 2.990 | 0.2591099 | 0.0188559 | 1.20 | 1.30 | 13.332  | 6.138   | 7.00  | 9.00   | 12.00  | 16.00  | 21.00  | 3.164 | 14.115  | 6.511   | 7.00  | 10.00  | 13.00  | 17.00  | 23.00   |
| 0.10 | 2.990 | 0.2591099 |           |      |      |         |         |       |        |        |        |        |       |         |         |       |        |        |        |         |

|      |       |           |           |      |      |         |         |       |        |        |        |        |       |         |         |       |        |        |        |         |
|------|-------|-----------|-----------|------|------|---------|---------|-------|--------|--------|--------|--------|-------|---------|---------|-------|--------|--------|--------|---------|
| 0.10 | 2.990 | 0.2591099 | 0.0188559 | 0.60 | 1.30 | 3.176   | 0.958   | 2.00  | 3.00   | 3.00   | 4.00   | 4.00   | 3.164 | 3.253   | 0.972   | 2.00  | 3.00   | 3.00   | 4.00   | 4.00    |
| 0.10 | 2.990 | 0.2591099 | 0.0188559 | 0.50 | 1.30 | 2.288   | 0.606   | 2.00  | 2.00   | 2.00   | 3.00   | 3.00   | 3.164 | 2.373   | 0.631   | 2.00  | 2.00   | 2.00   | 3.00   | 3.00    |
| 0.10 | 2.990 | 0.2591099 | 0.0188559 | 1.10 | 1.40 | 23.126  | 14.938  | 9.00  | 13.00  | 19.00  | 30.00  | 42.00  | 3.164 | 25.193  | 16.693  | 9.00  | 14.00  | 21.00  | 32.00  | 47.00   |
| 0.10 | 2.990 | 0.2591099 | 0.0188559 | 1.20 | 1.40 | 12.592  | 5.690   | 7.00  | 9.00   | 11.00  | 15.00  | 20.00  | 3.164 | 13.406  | 5.959   | 7.00  | 9.00   | 12.00  | 16.00  | 21.00   |
| 0.10 | 2.990 | 0.2591099 | 0.0188559 | 1.30 | 1.40 | 8.359   | 2.848   | 5.00  | 6.00   | 8.00   | 10.00  | 12.00  | 3.164 | 8.743   | 2.928   | 6.00  | 7.00   | 8.00   | 10.00  | 13.00   |
| 0.10 | 2.990 | 0.2591099 | 0.0188559 | 1.40 | 1.40 | 6.340   | 1.743   | 4.00  | 5.00   | 6.00   | 7.00   | 9.00   | 3.164 | 6.605   | 1.813   | 5.00  | 5.00   | 6.00   | 8.00   | 9.00    |
| 0.10 | 2.990 | 0.2591099 | 0.0188559 | 0.90 | 1.40 | 19.020  | 11.815  | 7.00  | 11.00  | 16.00  | 24.00  | 35.00  | 3.164 | 20.678  | 13.003  | 8.00  | 11.00  | 17.00  | 26.00  | 38.00   |
| 0.10 | 2.990 | 0.2591099 | 0.0188559 | 0.80 | 1.40 | 8.482   | 3.798   | 4.00  | 6.00   | 8.00   | 10.00  | 13.00  | 3.164 | 8.925   | 4.007   | 5.00  | 6.00   | 8.00   | 11.00  | 14.00   |
| 0.10 | 2.990 | 0.2591099 | 0.0188559 | 0.70 | 1.40 | 4.777   | 1.682   | 3.00  | 4.00   | 5.00   | 6.00   | 7.00   | 3.164 | 4.975   | 1.760   | 3.00  | 4.00   | 5.00   | 6.00   | 7.00    |
| 0.10 | 2.990 | 0.2591099 | 0.0188559 | 0.60 | 1.40 | 3.173   | 0.968   | 2.00  | 3.00   | 3.00   | 4.00   | 4.00   | 3.164 | 3.274   | 0.980   | 2.00  | 3.00   | 3.00   | 4.00   | 5.00    |
| 0.10 | 2.990 | 0.2591099 | 0.0188559 | 0.50 | 1.40 | 2.299   | 0.610   | 2.00  | 2.00   | 2.00   | 3.00   | 3.00   | 3.164 | 2.368   | 0.630   | 2.00  | 2.00   | 2.00   | 3.00   | 3.00    |
| 0.10 | 2.990 | 0.2591099 | 0.0188559 | 1.10 | 0.90 | 43.528  | 32.038  | 14.00 | 21.00  | 34.50  | 57.00  | 85.00  | 3.164 | 50.179  | 38.975  | 15.00 | 23.00  | 39.00  | 65.00  | 101.00  |
| 0.10 | 2.990 | 0.2591099 | 0.0188559 | 1.20 | 0.90 | 14.303  | 6.815   | 7.00  | 9.00   | 13.00  | 17.00  | 23.00  | 3.164 | 15.371  | 7.292   | 8.00  | 10.00  | 14.00  | 19.00  | 25.00   |
| 0.10 | 2.990 | 0.2591099 | 0.0188559 | 1.30 | 0.90 | 8.637   | 3.017   | 5.00  | 6.00   | 8.00   | 10.00  | 13.00  | 3.164 | 9.082   | 3.136   | 6.00  | 7.00   | 9.00   | 11.00  | 13.00   |
| 0.10 | 2.990 | 0.2591099 | 0.0188559 | 1.40 | 0.90 | 6.408   | 1.770   | 4.00  | 5.00   | 6.00   | 7.00   | 9.00   | 3.164 | 6.688   | 1.859   | 5.00  | 5.00   | 6.00   | 8.00   | 9.00    |
| 0.10 | 2.990 | 0.2591099 | 0.0188559 | 0.90 | 0.90 | 28.740  | 20.419  | 10.00 | 14.00  | 23.00  | 37.00  | 56.00  | 3.164 | 31.398  | 22.724  | 10.00 | 16.00  | 25.00  | 41.00  | 61.00   |
| 0.10 | 2.990 | 0.2591099 | 0.0188559 | 0.80 | 0.90 | 8.859   | 4.163   | 5.00  | 6.00   | 8.00   | 11.00  | 14.00  | 3.164 | 9.316   | 4.377   | 5.00  | 6.00   | 8.00   | 11.00  | 15.00   |
| 0.10 | 2.990 | 0.2591099 | 0.0188559 | 0.70 | 0.90 | 4.799   | 1.749   | 3.00  | 4.00   | 5.00   | 6.00   | 7.00   | 3.164 | 5.023   | 1.795   | 3.00  | 4.00   | 5.00   | 6.00   | 7.00    |
| 0.10 | 2.990 | 0.2591099 | 0.0188559 | 0.60 | 0.90 | 3.179   | 0.956   | 2.00  | 3.00   | 3.00   | 4.00   | 4.00   | 3.164 | 3.264   | 0.976   | 2.00  | 3.00   | 3.00   | 4.00   | 5.00    |
| 0.10 | 2.990 | 0.2591099 | 0.0188559 | 0.50 | 0.90 | 2.305   | 0.609   | 2.00  | 2.00   | 2.00   | 3.00   | 3.00   | 3.164 | 2.364   | 0.623   | 2.00  | 2.00   | 2.00   | 3.00   | 3.00    |
| 0.10 | 2.990 | 0.2591099 | 0.0188559 | 1.10 | 0.80 | 41.318  | 30.340  | 13.00 | 20.00  | 33.00  | 53.00  | 80.00  | 3.164 | 47.250  | 35.624  | 15.00 | 22.00  | 37.00  | 61.00  | 93.10   |
| 0.10 | 2.990 | 0.2591099 | 0.0188559 | 1.20 | 0.80 | 14.296  | 6.751   | 7.00  | 10.00  | 13.00  | 17.00  | 23.00  | 3.164 | 15.255  | 7.300   | 8.00  | 10.00  | 14.00  | 18.00  | 25.00   |
| 0.10 | 2.990 | 0.2591099 | 0.0188559 | 1.30 | 0.80 | 8.633   | 3.016   | 5.00  | 7.00   | 8.00   | 10.00  | 13.00  | 3.164 | 9.059   | 3.119   | 6.00  | 7.00   | 9.00   | 11.00  | 13.00   |
| 0.10 | 2.990 | 0.2591099 | 0.0188559 | 1.40 | 0.80 | 6.383   | 1.810   | 4.00  | 5.00   | 6.00   | 7.00   | 9.00   | 3.164 | 6.657   | 1.824   | 5.00  | 5.00   | 6.00   | 8.00   | 9.00    |
| 0.10 | 2.990 | 0.2591099 | 0.0188559 | 0.90 | 0.80 | 27.945  | 19.531  | 9.00  | 14.00  | 23.00  | 36.00  | 53.00  | 3.164 | 30.500  | 21.456  | 10.00 | 15.00  | 25.00  | 40.00  | 58.00   |
| 0.10 | 2.990 | 0.2591099 | 0.0188559 | 0.80 | 0.80 | 8.815   | 4.091   | 5.00  | 6.00   | 8.00   | 11.00  | 14.00  | 3.164 | 9.346   | 4.273   | 5.00  | 6.00   | 8.00   | 12.00  | 15.00   |
| 0.10 | 2.990 | 0.2591099 | 0.0188559 | 0.70 | 0.80 | 4.783   | 1.706   | 3.00  | 4.00   | 5.00   | 6.00   | 7.00   | 3.164 | 4.978   | 1.757   | 3.00  | 4.00   | 5.00   | 6.00   | 7.00    |
| 0.10 | 2.990 | 0.2591099 | 0.0188559 | 0.60 | 0.80 | 3.168   | 0.952   | 2.00  | 3.00   | 3.00   | 4.00   | 4.00   | 3.164 | 3.258   | 0.976   | 2.00  | 3.00   | 3.00   | 4.00   | 5.00    |
| 0.10 | 2.990 | 0.2591099 | 0.0188559 | 0.50 | 0.80 | 2.284   | 0.601   | 2.00  | 2.00   | 2.00   | 3.00   | 3.00   | 3.164 | 2.369   | 0.631   | 2.00  | 2.00   | 2.00   | 3.00   | 3.00    |
| 0.10 | 2.990 | 0.2591099 | 0.0188559 | 1.10 | 0.70 | 34.044  | 22.265  | 13.00 | 18.00  | 28.00  | 43.00  | 63.00  | 3.164 | 39.639  | 27.038  | 14.00 | 21.00  | 32.00  | 51.00  | 75.00   |
| 0.10 | 2.990 | 0.2591099 | 0.0188559 | 1.20 | 0.70 | 14.205  | 6.485   | 7.00  | 10.00  | 13.00  | 17.00  | 23.00  | 3.164 | 15.030  | 6.933   | 8.00  | 10.00  | 14.00  | 18.00  | 24.00   |
| 0.10 | 2.990 | 0.2591099 | 0.0188559 | 1.30 | 0.70 | 8.651   | 2.996   | 5.00  | 7.00   | 8.00   | 10.00  | 13.00  | 3.164 | 9.088   | 3.172   | 6.00  | 7.00   | 9.00   | 11.00  | 13.00   |
| 0.10 | 2.990 | 0.2591099 | 0.0188559 | 1.40 | 0.70 | 6.399   | 1.768   | 4.00  | 5.00   | 6.00   | 7.00   | 9.00   | 3.164 | 6.694   | 1.871   | 5.00  | 5.00   | 6.00   | 8.00   | 9.00    |
| 0.10 | 2.990 | 0.2591099 | 0.0188559 | 0.90 | 0.70 | 25.298  | 16.463  | 9.00  | 14.00  | 21.00  | 32.00  | 47.00  | 3.164 | 27.812  | 18.173  | 10.00 | 15.00  | 23.00  | 35.00  | 51.00   |
| 0.10 | 2.990 | 0.2591099 | 0.0188559 | 0.80 | 0.70 | 8.837   | 4.079   | 5.00  | 6.00   | 8.00   | 11.00  | 14.00  | 3.164 | 9.213   | 4.193   | 5.00  | 6.00   | 8.00   | 11.00  | 15.00   |
| 0.10 | 2.990 | 0.2591099 | 0.0188559 | 0.70 | 0.70 | 4.819   | 1.725   | 3.00  | 4.00   | 5.00   | 6.00   | 7.00   | 3.164 | 4.994   | 1.756   | 3.00  | 4.00   | 5.00   | 6.00   | 7.00    |
| 0.10 | 2.990 | 0.2591099 | 0.0188559 | 0.60 | 0.70 | 3.177   | 0.964   | 2.00  | 3.00   | 3.00   | 4.00   | 4.00   | 3.164 | 3.255   | 0.986   | 2.00  | 3.00   | 3.00   | 4.00   | 5.00    |
| 0.10 | 2.990 | 0.2591099 | 0.0188559 | 0.50 | 0.70 | 2.300   | 0.612   | 2.00  | 2.00   | 2.00   | 3.00   | 3.00   | 3.164 | 2.366   | 0.630   | 2.00  | 2.00   | 2.00   | 3.00   | 3.00    |
| 0.10 | 2.990 | 0.2591099 | 0.0188559 | 1.10 | 0.60 | 25.543  | 13.836  | 12.00 | 16.00  | 22.00  | 32.00  | 44.00  | 3.164 | 28.590  | 15.981  | 13.00 | 17.00  | 25.00  | 35.00  | 49.00   |
| 0.10 | 2.990 | 0.2591099 | 0.0188559 | 1.20 | 0.60 | 13.626  | 5.780   | 7.00  | 9.00   | 12.00  | 17.00  | 21.00  | 3.164 | 14.517  | 6.216   | 8.00  | 10.00  | 13.00  | 18.00  | 23.00   |
| 0.10 | 2.990 | 0.2591099 | 0.0188559 | 1.30 | 0.60 | 8.561   | 2.943   | 5.00  | 6.00   | 8.00   | 10.00  | 12.00  | 3.164 | 9.014   | 3.086   | 6.00  | 7.00   | 8.00   | 11.00  | 13.00   |
| 0.10 | 2.990 | 0.2591099 | 0.0188559 | 1.40 | 0.60 | 6.396   | 1.785   | 4.00  | 5.00   | 6.00   | 7.00   | 9.00   | 3.164 | 6.679   | 1.868   | 5.00  | 5.00   | 6.00   | 8.00   | 9.00    |
| 0.10 | 2.990 | 0.2591099 | 0.0188559 | 0.90 | 0.60 | 20.956  | 11.442  | 9.00  | 13.00  | 18.00  | 26.00  | 36.00  | 3.164 | 23.231  | 13.132  | 10.00 | 14.00  | 20.00  | 29.00  | 40.00   |
| 0.10 | 2.990 | 0.2591099 | 0.0188559 | 0.80 | 0.60 | 8.747   | 3.948   | 4.00  | 6.00   | 8.00   | 11.00  | 14.00  | 3.164 | 9.197   | 4.132   | 5.00  | 6.00   | 8.00   | 11.00  | 15.00   |
| 0.10 | 2.990 | 0.2591099 | 0.0188559 | 0.70 | 0.60 | 4.807   | 1.733   | 3.00  | 4.00   | 5.00   | 6.00   | 7.00   | 3.164 | 4.966   | 1.733   | 3.00  | 4.00   | 5.00   | 6.00   | 7.00    |
| 0.10 | 2.990 | 0.2591099 | 0.0188559 | 0.60 | 0.60 | 3.172   | 0.961   | 2.00  | 3.00   | 3.00   | 4.00   | 4.00   | 3.164 | 3.263   | 0.996   | 2.00  | 3.00   | 3.00   | 4.00   | 5.00    |
| 0.10 | 2.990 | 0.2591099 | 0.0188559 | 0.50 | 0.60 | 2.296   | 0.600   | 2.00  | 2.00   | 2.00   | 3.00   | 3.00   | 3.164 | 2.359   | 0.623   | 2.00  | 2.00   | 2.00   | 3.00   | 3.00    |
| 0.10 | 2.990 | 0.2591099 | 0.0188559 | 1.10 | 0.50 | 18.188  | 7.494   | 10.00 | 13.00  | 17.00  | 22.00  | 28.00  | 3.164 | 19.745  | 8.056   | 11.00 | 14.00  | 18.00  | 24.00  | 30.00   |
| 0.10 | 2.990 | 0.2591099 | 0.0188559 | 1.20 | 0.50 | 12.561  | 4.620   | 7.00  | 9.00   | 12.00  | 15.00  | 19.00  | 3.164 | 13.423  | 5.040   | 8.00  | 10.00  | 13.00  | 16.00  | 20.00   |
| 0.10 | 2.990 | 0.2591099 | 0.0188559 | 1.30 | 0.50 | 8.478   | 2.776   | 5.00  | 6.00   | 8.00   | 10.00  | 12.00  | 3.164 | 8.962   | 2.939   | 6.00  | 7.00   | 8.00   | 11.00  | 13.00   |
| 0.10 | 2.990 | 0.2591099 | 0.0188559 | 1.40 | 0.50 | 6.391   | 1.778   | 4.00  | 5.00   | 6.00   | 7.00   | 9.00   | 3.164 | 6.672   | 1.858   | 5.00  | 5.00   | 6.00   | 8.00   | 9.00    |
| 0.10 | 2.990 | 0.2591099 | 0.0188559 | 0.90 | 0.50 | 16.305  | 6.914   | 9.00  | 12.00  | 15.00  | 20.00  | 25.00  | 3.164 | 17.554  | 7.528   | 10.00 | 12.00  | 16.00  | 21.00  | 27.00   |
| 0.10 | 2.990 | 0.2591099 | 0.0188559 | 0.80 | 0.50 | 8.583   | 3.601   | 5.00  | 6.00   | 8.00   | 11.00  | 13.00  | 3.164 | 9.095   | 3.867   | 5.00  | 6.00   | 8.00   | 11.00  | 14.00   |
| 0.10 | 2.990 | 0.2591099 | 0.0188559 | 0.70 | 0.50 | 4.782   | 1.689   | 3.00  | 4.00   | 5.00   | 6.00   | 7.00   | 3.164 | 5.006   | 1.797   | 3.00  | 4.00   | 5.00   | 6.00   | 7.00    |
| 0.10 | 2.990 | 0.2591099 | 0.0188559 | 0.60 | 0.50 | 3.161   | 0.955   | 2.00  | 3.00   | 3.00   | 4.00   | 4.00   | 3.164 | 3.286   | 0.984   | 2.00  | 3.00   | 3.00   | 4.00   | 5.00    |
| 0.10 | 2.990 | 0.2591099 | 0.0188559 | 0.50 | 0.50 | 2.303   | 0.613   | 2.00  | 2.00   | 2.00   | 3.00   | 3.00   | 3.164 | 2.359   | 0.613   | 2.00  | 2.00   | 2.00   | 3.00   | 3.00    |
| 0.15 | 3.108 | 0.3218169 | 0.0287890 | 1.00 | 1.00 | 370.290 | 361.407 | 44.00 | 111.00 | 261.00 | 518.00 | 842.00 | 3.276 | 499.754 | 488.871 | 59.00 | 152.00 | 352.00 | 693.25 | 1133.00 |
| 0.15 | 3.108 | 0.3218169 | 0.0287890 | 1.10 | 1.10 | 48.858  | 40.410  |       |        |        |        |        |       |         |         |       |        |        |        |         |

|      |       |           |           |      |      |        |        |       |       |       |       |        |       |        |        |       |       |       |       |        |
|------|-------|-----------|-----------|------|------|--------|--------|-------|-------|-------|-------|--------|-------|--------|--------|-------|-------|-------|-------|--------|
| 0.15 | 3.108 | 0.3218169 | 0.0287890 | 0.80 | 1.10 | 8.311  | 4.412  | 4.00  | 5.00  | 7.00  | 10.00 | 14.00  | 3.276 | 8.669  | 4.617  | 4.00  | 5.00  | 8.00  | 11.00 | 15.00  |
| 0.15 | 3.108 | 0.3218169 | 0.0287890 | 0.70 | 1.10 | 4.344  | 1.736  | 2.00  | 3.00  | 4.00  | 5.00  | 7.00   | 3.276 | 4.525  | 1.804  | 3.00  | 3.00  | 4.00  | 5.00  | 7.00   |
| 0.15 | 3.108 | 0.3218169 | 0.0287890 | 0.60 | 1.10 | 2.815  | 0.936  | 2.00  | 2.00  | 3.00  | 3.00  | 4.00   | 3.276 | 2.907  | 0.960  | 2.00  | 2.00  | 3.00  | 3.00  | 4.00   |
| 0.15 | 3.108 | 0.3218169 | 0.0287890 | 0.50 | 1.10 | 2.054  | 0.614  | 1.00  | 2.00  | 2.00  | 2.00  | 3.00   | 3.276 | 2.087  | 0.612  | 1.00  | 2.00  | 2.00  | 2.00  | 3.00   |
| 0.15 | 3.108 | 0.3218169 | 0.0287890 | 1.10 | 1.20 | 39.158 | 31.594 | 10.00 | 17.00 | 30.00 | 51.00 | 81.00  | 3.276 | 45.457 | 37.797 | 11.90 | 19.00 | 34.00 | 59.00 | 94.00  |
| 0.15 | 3.108 | 0.3218169 | 0.0287890 | 1.20 | 1.20 | 14.176 | 7.982  | 6.00  | 9.00  | 12.00 | 18.00 | 25.00  | 3.276 | 15.425 | 8.761  | 7.00  | 9.00  | 13.00 | 19.00 | 27.00  |
| 0.15 | 3.108 | 0.3218169 | 0.0287890 | 1.30 | 1.20 | 8.179  | 3.312  | 5.00  | 6.00  | 7.00  | 10.00 | 12.00  | 3.276 | 8.709  | 3.629  | 5.00  | 6.00  | 8.00  | 10.00 | 13.00  |
| 0.15 | 3.108 | 0.3218169 | 0.0287890 | 1.40 | 1.20 | 5.931  | 1.940  | 4.00  | 5.00  | 6.00  | 7.00  | 9.00   | 3.276 | 6.185  | 2.029  | 4.00  | 5.00  | 6.00  | 7.00  | 9.00   |
| 0.15 | 3.108 | 0.3218169 | 0.0287890 | 0.90 | 1.20 | 25.766 | 19.521 | 8.00  | 12.00 | 20.00 | 34.00 | 51.00  | 3.276 | 28.999 | 22.565 | 8.00  | 13.00 | 23.00 | 38.00 | 59.00  |
| 0.15 | 3.108 | 0.3218169 | 0.0287890 | 0.80 | 1.20 | 8.252  | 4.359  | 4.00  | 5.00  | 7.00  | 10.00 | 14.00  | 3.276 | 8.559  | 4.413  | 4.00  | 5.00  | 8.00  | 11.00 | 14.00  |
| 0.15 | 3.108 | 0.3218169 | 0.0287890 | 0.70 | 1.20 | 4.330  | 1.742  | 2.00  | 3.00  | 4.00  | 5.00  | 7.00   | 3.276 | 4.490  | 1.792  | 3.00  | 3.00  | 4.00  | 5.00  | 7.00   |
| 0.15 | 3.108 | 0.3218169 | 0.0287890 | 0.60 | 1.20 | 2.819  | 0.938  | 2.00  | 2.00  | 3.00  | 3.00  | 4.00   | 3.276 | 2.903  | 0.968  | 2.00  | 2.00  | 3.00  | 3.00  | 4.00   |
| 0.15 | 3.108 | 0.3218169 | 0.0287890 | 0.50 | 1.20 | 2.047  | 0.608  | 1.00  | 2.00  | 2.00  | 2.00  | 3.00   | 3.276 | 2.098  | 0.610  | 1.00  | 2.00  | 2.00  | 2.00  | 3.00   |
| 0.15 | 3.108 | 0.3218169 | 0.0287890 | 1.10 | 1.30 | 30.164 | 23.309 | 9.00  | 14.00 | 23.00 | 40.00 | 60.00  | 3.276 | 35.006 | 28.318 | 9.00  | 15.00 | 26.00 | 46.00 | 72.00  |
| 0.15 | 3.108 | 0.3218169 | 0.0287890 | 1.20 | 1.30 | 13.360 | 7.218  | 6.00  | 8.00  | 12.00 | 17.00 | 23.00  | 3.276 | 14.559 | 8.190  | 7.00  | 9.00  | 13.00 | 18.00 | 25.00  |
| 0.15 | 3.108 | 0.3218169 | 0.0287890 | 1.30 | 1.30 | 8.138  | 3.317  | 5.00  | 6.00  | 7.00  | 10.00 | 12.00  | 3.276 | 8.562  | 3.446  | 5.00  | 6.00  | 8.00  | 10.00 | 13.00  |
| 0.15 | 3.108 | 0.3218169 | 0.0287890 | 1.40 | 1.30 | 5.871  | 1.880  | 4.00  | 5.00  | 6.00  | 7.00  | 8.00   | 3.276 | 6.158  | 1.982  | 4.00  | 5.00  | 6.00  | 7.00  | 9.00   |
| 0.15 | 3.108 | 0.3218169 | 0.0287890 | 0.90 | 1.30 | 22.168 | 16.447 | 7.00  | 11.00 | 18.00 | 28.00 | 43.00  | 3.276 | 24.373 | 17.937 | 8.00  | 12.00 | 19.00 | 32.00 | 48.00  |
| 0.15 | 3.108 | 0.3218169 | 0.0287890 | 0.80 | 1.30 | 8.098  | 4.157  | 4.00  | 5.00  | 7.00  | 10.00 | 14.00  | 3.276 | 8.529  | 4.369  | 4.00  | 5.00  | 8.00  | 11.00 | 14.00  |
| 0.15 | 3.108 | 0.3218169 | 0.0287890 | 0.70 | 1.30 | 4.327  | 1.732  | 2.00  | 3.00  | 4.00  | 5.00  | 7.00   | 3.276 | 4.488  | 1.783  | 3.00  | 3.00  | 4.00  | 5.00  | 7.00   |
| 0.15 | 3.108 | 0.3218169 | 0.0287890 | 0.60 | 1.30 | 2.810  | 0.934  | 2.00  | 2.00  | 3.00  | 3.00  | 4.00   | 3.276 | 2.894  | 0.957  | 2.00  | 2.00  | 3.00  | 3.00  | 4.00   |
| 0.15 | 3.108 | 0.3218169 | 0.0287890 | 0.50 | 1.30 | 2.042  | 0.612  | 1.00  | 2.00  | 2.00  | 2.00  | 3.00   | 3.276 | 2.099  | 0.603  | 1.00  | 2.00  | 2.00  | 2.00  | 3.00   |
| 0.15 | 3.108 | 0.3218169 | 0.0287890 | 1.10 | 1.40 | 24.025 | 17.726 | 8.00  | 12.00 | 19.00 | 31.00 | 47.00  | 3.276 | 26.531 | 19.793 | 8.00  | 13.00 | 21.00 | 35.00 | 52.00  |
| 0.15 | 3.108 | 0.3218169 | 0.0287890 | 1.20 | 1.40 | 12.654 | 6.881  | 6.00  | 8.00  | 11.00 | 16.00 | 22.00  | 3.276 | 13.689 | 7.478  | 6.00  | 8.00  | 12.00 | 17.00 | 23.00  |
| 0.15 | 3.108 | 0.3218169 | 0.0287890 | 1.30 | 1.40 | 7.906  | 3.197  | 5.00  | 6.00  | 7.00  | 9.00  | 12.00  | 3.276 | 8.337  | 3.386  | 5.00  | 6.00  | 8.00  | 10.00 | 13.00  |
| 0.15 | 3.108 | 0.3218169 | 0.0287890 | 1.40 | 1.40 | 5.820  | 1.855  | 4.00  | 4.00  | 6.00  | 7.00  | 8.00   | 3.276 | 6.109  | 1.984  | 4.00  | 5.00  | 6.00  | 7.00  | 9.00   |
| 0.15 | 3.108 | 0.3218169 | 0.0287890 | 0.90 | 1.40 | 18.574 | 13.056 | 6.00  | 9.00  | 15.00 | 24.00 | 36.00  | 3.276 | 20.504 | 14.825 | 7.00  | 10.00 | 16.00 | 26.00 | 40.00  |
| 0.15 | 3.108 | 0.3218169 | 0.0287890 | 0.80 | 1.40 | 7.848  | 3.932  | 4.00  | 5.00  | 7.00  | 10.00 | 13.00  | 3.276 | 8.324  | 4.209  | 4.00  | 5.00  | 7.00  | 10.00 | 14.00  |
| 0.15 | 3.108 | 0.3218169 | 0.0287890 | 0.70 | 1.40 | 4.299  | 1.694  | 2.00  | 3.00  | 4.00  | 5.00  | 6.00   | 3.276 | 4.499  | 1.759  | 3.00  | 3.00  | 4.00  | 5.00  | 7.00   |
| 0.15 | 3.108 | 0.3218169 | 0.0287890 | 0.60 | 1.40 | 2.814  | 0.941  | 2.00  | 2.00  | 3.00  | 3.00  | 4.00   | 3.276 | 2.902  | 0.963  | 2.00  | 2.00  | 3.00  | 3.00  | 4.00   |
| 0.15 | 3.108 | 0.3218169 | 0.0287890 | 0.50 | 1.40 | 2.039  | 0.604  | 1.00  | 2.00  | 2.00  | 2.00  | 3.00   | 3.276 | 2.089  | 0.604  | 1.00  | 2.00  | 2.00  | 2.00  | 3.00   |
| 0.15 | 3.108 | 0.3218169 | 0.0287890 | 1.10 | 0.90 | 57.218 | 47.805 | 14.00 | 24.00 | 43.00 | 76.00 | 119.10 | 3.276 | 66.622 | 56.864 | 15.00 | 26.00 | 49.00 | 89.00 | 144.00 |
| 0.15 | 3.108 | 0.3218169 | 0.0287890 | 1.20 | 0.90 | 14.928 | 8.575  | 7.00  | 9.00  | 13.00 | 18.00 | 26.00  | 3.276 | 16.277 | 9.529  | 7.00  | 10.00 | 14.00 | 20.00 | 29.00  |
| 0.15 | 3.108 | 0.3218169 | 0.0287890 | 1.30 | 0.90 | 8.269  | 3.387  | 5.00  | 6.00  | 8.00  | 10.00 | 13.00  | 3.276 | 8.760  | 3.723  | 5.00  | 6.00  | 8.00  | 10.00 | 14.00  |
| 0.15 | 3.108 | 0.3218169 | 0.0287890 | 1.40 | 0.90 | 5.936  | 1.941  | 4.00  | 5.00  | 6.00  | 7.00  | 8.00   | 3.276 | 6.216  | 2.006  | 4.00  | 5.00  | 6.00  | 7.00  | 9.00   |
| 0.15 | 3.108 | 0.3218169 | 0.0287890 | 0.90 | 0.90 | 30.691 | 24.562 | 8.00  | 13.00 | 24.00 | 40.00 | 63.00  | 3.276 | 34.020 | 27.067 | 9.00  | 15.00 | 26.00 | 45.00 | 70.00  |
| 0.15 | 3.108 | 0.3218169 | 0.0287890 | 0.80 | 0.90 | 8.388  | 4.556  | 4.00  | 5.00  | 7.00  | 11.00 | 14.00  | 3.276 | 8.757  | 4.719  | 4.00  | 5.00  | 8.00  | 11.00 | 15.00  |
| 0.15 | 3.108 | 0.3218169 | 0.0287890 | 0.70 | 0.90 | 4.313  | 1.704  | 2.00  | 3.00  | 4.00  | 5.00  | 7.00   | 3.276 | 4.496  | 1.786  | 3.00  | 3.00  | 4.00  | 5.00  | 7.00   |
| 0.15 | 3.108 | 0.3218169 | 0.0287890 | 0.60 | 0.90 | 2.813  | 0.935  | 2.00  | 2.00  | 3.00  | 3.00  | 4.00   | 3.276 | 2.890  | 0.947  | 2.00  | 2.00  | 3.00  | 3.00  | 4.00   |
| 0.15 | 3.108 | 0.3218169 | 0.0287890 | 0.50 | 0.90 | 2.038  | 0.605  | 1.00  | 2.00  | 2.00  | 2.00  | 3.00   | 3.276 | 2.101  | 0.610  | 1.00  | 2.00  | 2.00  | 2.00  | 3.00   |
| 0.15 | 3.108 | 0.3218169 | 0.0287890 | 1.10 | 0.80 | 53.065 | 44.336 | 13.00 | 22.00 | 40.00 | 70.00 | 111.00 | 3.276 | 64.904 | 55.726 | 15.00 | 25.00 | 48.00 | 86.00 | 137.00 |
| 0.15 | 3.108 | 0.3218169 | 0.0287890 | 1.20 | 0.80 | 14.838 | 8.472  | 7.00  | 9.00  | 13.00 | 18.00 | 26.00  | 3.276 | 16.200 | 9.411  | 7.00  | 10.00 | 14.00 | 20.00 | 28.00  |
| 0.15 | 3.108 | 0.3218169 | 0.0287890 | 1.30 | 0.80 | 8.317  | 3.418  | 5.00  | 6.00  | 8.00  | 10.00 | 13.00  | 3.276 | 8.791  | 3.674  | 5.00  | 6.00  | 8.00  | 11.00 | 14.00  |
| 0.15 | 3.108 | 0.3218169 | 0.0287890 | 1.40 | 0.80 | 5.921  | 1.912  | 4.00  | 5.00  | 6.00  | 7.00  | 8.00   | 3.276 | 6.248  | 2.038  | 4.00  | 5.00  | 6.00  | 7.00  | 9.00   |
| 0.15 | 3.108 | 0.3218169 | 0.0287890 | 0.90 | 0.80 | 30.178 | 23.817 | 8.00  | 14.00 | 24.00 | 39.00 | 61.00  | 3.276 | 33.322 | 26.508 | 9.00  | 15.00 | 26.00 | 44.00 | 68.00  |
| 0.15 | 3.108 | 0.3218169 | 0.0287890 | 0.80 | 0.80 | 8.311  | 4.402  | 4.00  | 5.00  | 7.00  | 10.00 | 14.00  | 3.276 | 8.726  | 4.640  | 4.00  | 5.00  | 8.00  | 11.00 | 15.00  |
| 0.15 | 3.108 | 0.3218169 | 0.0287890 | 0.70 | 0.80 | 4.336  | 1.709  | 2.00  | 3.00  | 4.00  | 5.00  | 7.00   | 3.276 | 4.492  | 1.782  | 3.00  | 3.00  | 4.00  | 5.00  | 7.00   |
| 0.15 | 3.108 | 0.3218169 | 0.0287890 | 0.60 | 0.80 | 2.816  | 0.938  | 2.00  | 2.00  | 3.00  | 3.00  | 4.00   | 3.276 | 2.906  | 0.965  | 2.00  | 2.00  | 3.00  | 3.00  | 4.00   |
| 0.15 | 3.108 | 0.3218169 | 0.0287890 | 0.50 | 0.80 | 2.044  | 0.613  | 1.00  | 2.00  | 2.00  | 2.00  | 3.00   | 3.276 | 2.095  | 0.617  | 1.00  | 2.00  | 2.00  | 2.00  | 3.00   |
| 0.15 | 3.108 | 0.3218169 | 0.0287890 | 1.10 | 0.70 | 46.113 | 36.828 | 13.00 | 20.00 | 35.00 | 61.00 | 94.00  | 3.276 | 56.882 | 47.119 | 14.00 | 24.00 | 43.00 | 75.00 | 117.00 |
| 0.15 | 3.108 | 0.3218169 | 0.0287890 | 1.20 | 0.70 | 14.955 | 8.487  | 7.00  | 9.00  | 13.00 | 19.00 | 26.00  | 3.276 | 16.202 | 9.435  | 7.00  | 10.00 | 14.00 | 20.00 | 28.00  |
| 0.15 | 3.108 | 0.3218169 | 0.0287890 | 1.30 | 0.70 | 8.325  | 3.411  | 5.00  | 6.00  | 8.00  | 10.00 | 13.00  | 3.276 | 8.723  | 3.660  | 5.00  | 6.00  | 8.00  | 10.00 | 13.00  |
| 0.15 | 3.108 | 0.3218169 | 0.0287890 | 1.40 | 0.70 | 5.927  | 1.969  | 4.00  | 5.00  | 6.00  | 7.00  | 8.00   | 3.276 | 6.198  | 2.009  | 4.00  | 5.00  | 6.00  | 7.00  | 9.00   |
| 0.15 | 3.108 | 0.3218169 | 0.0287890 | 0.90 | 0.70 | 28.273 | 21.300 | 8.00  | 13.00 | 22.00 | 37.00 | 56.00  | 3.276 | 32.553 | 25.559 | 9.00  | 15.00 | 25.00 | 43.00 | 66.00  |
| 0.15 | 3.108 | 0.3218169 | 0.0287890 | 0.80 | 0.70 | 8.355  | 4.409  | 4.00  | 5.00  | 7.00  | 10.00 | 14.00  | 3.276 | 8.778  | 4.684  | 4.00  | 5.00  | 8.00  | 11.00 | 15.00  |
| 0.15 | 3.108 | 0.3218169 | 0.0287890 | 0.70 | 0.70 | 4.363  | 1.734  | 2.00  | 3.00  | 4.00  | 5.00  | 7.00   | 3.276 | 4.504  | 1.799  | 3.00  | 3.00  | 4.00  | 5.00  | 7.00   |
| 0.15 | 3.108 | 0.3218169 | 0.0287890 | 0.60 | 0.70 | 2.809  | 0.927  | 2.00  | 2.00  | 3.00  | 3.00  | 4.00   | 3.276 | 2.889  | 0.960  | 2.00  | 2.00  | 3.00  | 3.00  | 4.00   |
| 0.15 | 3.108 | 0.3218169 | 0.0287890 |      |      |        |        |       |       |       |       |        |       |        |        |       |       |       |       |        |

|      |       |           |           |      |      |        |        |       |       |       |       |       |       |        |        |       |       |       |       |       |
|------|-------|-----------|-----------|------|------|--------|--------|-------|-------|-------|-------|-------|-------|--------|--------|-------|-------|-------|-------|-------|
| 0.15 | 3.108 | 0.3218169 | 0.0287890 | 0.90 | 0.60 | 24.223 | 16.665 | 8.00  | 13.00 | 20.00 | 31.00 | 45.00 | 3.276 | 27.524 | 19.542 | 9.00  | 14.00 | 22.00 | 36.00 | 53.00 |
| 0.15 | 3.108 | 0.3218169 | 0.0287890 | 0.80 | 0.60 | 8.301  | 4.262  | 4.00  | 5.00  | 7.00  | 10.00 | 14.00 | 3.276 | 8.746  | 4.506  | 4.00  | 6.00  | 8.00  | 11.00 | 15.00 |
| 0.15 | 3.108 | 0.3218169 | 0.0287890 | 0.70 | 0.60 | 4.355  | 1.733  | 2.00  | 3.00  | 4.00  | 5.00  | 7.00  | 3.276 | 4.476  | 1.783  | 3.00  | 3.00  | 4.00  | 5.00  | 7.00  |
| 0.15 | 3.108 | 0.3218169 | 0.0287890 | 0.60 | 0.60 | 2.801  | 0.929  | 2.00  | 2.00  | 3.00  | 3.00  | 4.00  | 3.276 | 2.905  | 0.948  | 2.00  | 2.00  | 3.00  | 3.00  | 4.00  |
| 0.15 | 3.108 | 0.3218169 | 0.0287890 | 0.50 | 0.60 | 2.035  | 0.610  | 1.00  | 2.00  | 2.00  | 3.00  | 3.00  | 3.276 | 2.101  | 0.599  | 1.00  | 2.00  | 2.00  | 2.00  | 3.00  |
| 0.15 | 3.108 | 0.3218169 | 0.0287890 | 1.10 | 0.50 | 22.404 | 12.556 | 10.00 | 14.00 | 19.00 | 28.00 | 39.00 | 3.276 | 25.942 | 15.249 | 11.00 | 15.00 | 22.00 | 32.00 | 46.00 |
| 0.15 | 3.108 | 0.3218169 | 0.0287890 | 1.20 | 0.50 | 13.191 | 6.271  | 7.00  | 9.00  | 12.00 | 16.00 | 21.00 | 3.276 | 14.416 | 7.182  | 7.00  | 9.00  | 13.00 | 18.00 | 24.00 |
| 0.15 | 3.108 | 0.3218169 | 0.0287890 | 1.30 | 0.50 | 8.199  | 3.240  | 5.00  | 6.00  | 8.00  | 10.00 | 12.00 | 3.276 | 8.703  | 3.499  | 5.00  | 6.00  | 8.00  | 10.00 | 13.00 |
| 0.15 | 3.108 | 0.3218169 | 0.0287890 | 1.40 | 0.50 | 5.915  | 1.933  | 4.00  | 5.00  | 6.00  | 7.00  | 8.00  | 3.276 | 6.248  | 2.052  | 4.00  | 5.00  | 6.00  | 7.00  | 9.00  |
| 0.15 | 3.108 | 0.3218169 | 0.0287890 | 0.90 | 0.50 | 18.535 | 10.526 | 8.00  | 11.00 | 16.00 | 23.00 | 32.00 | 3.276 | 20.850 | 12.268 | 9.00  | 12.00 | 18.00 | 26.00 | 36.00 |
| 0.15 | 3.108 | 0.3218169 | 0.0287890 | 0.80 | 0.50 | 8.103  | 4.037  | 4.00  | 5.00  | 7.00  | 10.00 | 13.00 | 3.276 | 8.693  | 4.385  | 4.00  | 6.00  | 8.00  | 11.00 | 15.00 |
| 0.15 | 3.108 | 0.3218169 | 0.0287890 | 0.70 | 0.50 | 4.306  | 1.700  | 2.00  | 3.00  | 4.00  | 5.00  | 7.00  | 3.276 | 4.510  | 1.804  | 3.00  | 3.00  | 4.00  | 5.00  | 7.00  |
| 0.15 | 3.108 | 0.3218169 | 0.0287890 | 0.60 | 0.50 | 2.819  | 0.940  | 2.00  | 2.00  | 3.00  | 3.00  | 4.00  | 3.276 | 2.903  | 0.952  | 2.00  | 2.00  | 3.00  | 3.00  | 4.00  |
| 0.15 | 3.108 | 0.3218169 | 0.0287890 | 0.50 | 0.50 | 2.031  | 0.597  | 1.00  | 2.00  | 2.00  | 2.00  | 3.00  | 3.276 | 2.086  | 0.609  | 1.00  | 2.00  | 2.00  | 2.00  | 3.00  |

$ARL_0 = 370$

$ARL_0 = 500$

| Case 3<br>$\phi=80$ |       |           |           |      |      |         |         |       |        |        |        |        |       |         |         |       |        |        |        |         |  |  |
|---------------------|-------|-----------|-----------|------|------|---------|---------|-------|--------|--------|--------|--------|-------|---------|---------|-------|--------|--------|--------|---------|--|--|
| 0.05                | 2.707 | 0.1806445 | 0.0092291 | 1.00 | 1.00 | 370.250 | 354.125 | 53.00 | 116.00 | 260.00 | 514.00 | 841.00 | 2.887 | 500.238 | 490.462 | 66.00 | 153.00 | 346.00 | 687.00 | 1133.00 |  |  |
| 0.05                | 2.707 | 0.1806445 | 0.0092291 | 1.10 | 1.10 | 55.301  | 37.990  | 19.00 | 29.00  | 45.00  | 71.00  | 104.00 | 2.887 | 60.964  | 42.184  | 21.00 | 31.00  | 49.00  | 78.00  | 117.00  |  |  |
| 0.05                | 2.707 | 0.1806445 | 0.0092291 | 1.20 | 1.10 | 22.796  | 10.267  | 12.00 | 15.00  | 21.00  | 28.00  | 36.00  | 2.887 | 24.047  | 10.716  | 13.00 | 16.00  | 22.00  | 29.00  | 38.00   |  |  |
| 0.05                | 2.707 | 0.1806445 | 0.0092291 | 1.30 | 1.10 | 14.377  | 4.859   | 9.00  | 11.00  | 14.00  | 17.00  | 21.00  | 2.887 | 15.083  | 5.019   | 10.00 | 11.00  | 14.00  | 18.00  | 22.00   |  |  |
| 0.05                | 2.707 | 0.1806445 | 0.0092291 | 1.40 | 1.10 | 10.730  | 2.970   | 7.00  | 9.00   | 10.00  | 12.00  | 15.00  | 2.887 | 11.326  | 3.164   | 8.00  | 9.00   | 11.00  | 13.00  | 15.00   |  |  |
| 0.05                | 2.707 | 0.1806445 | 0.0092291 | 0.90 | 1.10 | 40.469  | 26.748  | 15.00 | 22.00  | 34.00  | 52.00  | 75.00  | 2.887 | 43.727  | 29.321  | 16.00 | 23.00  | 36.00  | 56.00  | 82.00   |  |  |
| 0.05                | 2.707 | 0.1806445 | 0.0092291 | 0.80 | 1.10 | 14.585  | 6.631   | 8.00  | 10.00  | 13.00  | 18.00  | 23.00  | 2.887 | 15.424  | 6.905   | 8.00  | 11.00  | 14.00  | 19.00  | 24.00   |  |  |
| 0.05                | 2.707 | 0.1806445 | 0.0092291 | 0.70 | 1.10 | 8.087   | 2.934   | 5.00  | 6.00   | 8.00   | 10.00  | 12.00  | 2.887 | 8.375   | 3.004   | 5.00  | 6.00   | 8.00   | 10.00  | 12.00   |  |  |
| 0.05                | 2.707 | 0.1806445 | 0.0092291 | 0.60 | 1.10 | 5.279   | 1.630   | 3.00  | 4.00   | 5.00   | 6.00   | 7.00   | 2.887 | 5.487   | 1.682   | 4.00  | 4.00   | 5.00   | 6.00   | 8.00    |  |  |
| 0.05                | 2.707 | 0.1806445 | 0.0092291 | 0.50 | 1.10 | 3.745   | 1.044   | 3.00  | 3.00   | 4.00   | 4.00   | 5.00   | 2.887 | 3.880   | 1.051   | 3.00  | 3.00   | 4.00   | 4.00   | 5.00    |  |  |
| 0.05                | 2.707 | 0.1806445 | 0.0092291 | 1.10 | 1.20 | 44.081  | 28.206  | 17.00 | 24.00  | 37.00  | 57.00  | 81.00  | 2.887 | 49.143  | 32.243  | 18.00 | 26.00  | 41.00  | 63.00  | 91.00   |  |  |
| 0.05                | 2.707 | 0.1806445 | 0.0092291 | 1.20 | 1.20 | 21.684  | 9.641   | 12.00 | 15.00  | 20.00  | 26.00  | 34.00  | 2.887 | 23.332  | 10.261  | 13.00 | 16.00  | 21.00  | 28.00  | 37.00   |  |  |
| 0.05                | 2.707 | 0.1806445 | 0.0092291 | 1.30 | 1.20 | 14.172  | 4.756   | 9.00  | 11.00  | 13.00  | 17.00  | 20.00  | 2.887 | 15.025  | 5.036   | 10.00 | 11.00  | 14.00  | 18.00  | 22.00   |  |  |
| 0.05                | 2.707 | 0.1806445 | 0.0092291 | 1.40 | 1.20 | 10.730  | 2.957   | 7.00  | 9.00   | 10.00  | 12.00  | 15.00  | 2.887 | 11.295  | 3.046   | 8.00  | 9.00   | 11.00  | 13.00  | 15.00   |  |  |
| 0.05                | 2.707 | 0.1806445 | 0.0092291 | 0.90 | 1.20 | 34.905  | 21.825  | 13.00 | 19.00  | 29.00  | 44.00  | 63.00  | 2.887 | 37.947  | 23.654  | 14.00 | 21.00  | 32.00  | 49.00  | 70.00   |  |  |
| 0.05                | 2.707 | 0.1806445 | 0.0092291 | 0.80 | 1.20 | 14.386  | 6.527   | 7.00  | 10.00  | 13.00  | 18.00  | 23.00  | 2.887 | 15.169  | 6.813   | 8.00  | 10.00  | 14.00  | 19.00  | 24.00   |  |  |
| 0.05                | 2.707 | 0.1806445 | 0.0092291 | 0.70 | 1.20 | 8.057   | 2.939   | 5.00  | 6.00   | 8.00   | 10.00  | 12.00  | 2.887 | 8.471   | 3.029   | 5.00  | 6.00   | 8.00   | 10.00  | 12.00   |  |  |
| 0.05                | 2.707 | 0.1806445 | 0.0092291 | 0.60 | 1.20 | 5.289   | 1.614   | 3.00  | 4.00   | 5.00   | 6.00   | 7.00   | 2.887 | 5.466   | 1.702   | 4.00  | 4.00   | 5.00   | 6.00   | 8.00    |  |  |
| 0.05                | 2.707 | 0.1806445 | 0.0092291 | 0.50 | 1.20 | 3.746   | 1.042   | 3.00  | 3.00   | 4.00   | 4.00   | 5.00   | 2.887 | 3.870   | 1.064   | 3.00  | 3.00   | 4.00   | 4.00   | 5.00    |  |  |
| 0.05                | 2.707 | 0.1806445 | 0.0092291 | 1.10 | 1.30 | 34.330  | 20.297  | 14.00 | 20.00  | 30.00  | 43.00  | 61.00  | 2.887 | 37.413  | 22.294  | 15.00 | 21.00  | 32.00  | 48.00  | 67.00   |  |  |
| 0.05                | 2.707 | 0.1806445 | 0.0092291 | 1.20 | 1.30 | 20.321  | 8.842   | 11.00 | 14.00  | 19.00  | 25.00  | 32.00  | 2.887 | 21.851  | 9.306   | 12.00 | 15.00  | 20.00  | 27.00  | 34.00   |  |  |
| 0.05                | 2.707 | 0.1806445 | 0.0092291 | 1.30 | 1.30 | 13.885  | 4.633   | 9.00  | 11.00  | 13.00  | 16.00  | 20.00  | 2.887 | 14.677  | 4.788   | 9.00  | 11.00  | 14.00  | 17.00  | 21.00   |  |  |
| 0.05                | 2.707 | 0.1806445 | 0.0092291 | 1.40 | 1.30 | 10.686  | 2.940   | 7.00  | 9.00   | 10.00  | 12.00  | 15.00  | 2.887 | 11.178  | 3.045   | 8.00  | 9.00   | 11.00  | 13.00  | 15.00   |  |  |
| 0.05                | 2.707 | 0.1806445 | 0.0092291 | 0.90 | 1.30 | 29.079  | 17.126  | 12.00 | 17.00  | 25.00  | 37.00  | 52.00  | 2.887 | 31.324  | 18.993  | 13.00 | 18.00  | 27.00  | 39.00  | 56.00   |  |  |
| 0.05                | 2.707 | 0.1806445 | 0.0092291 | 0.80 | 1.30 | 14.138  | 6.202   | 7.00  | 10.00  | 13.00  | 17.00  | 22.00  | 2.887 | 14.779  | 6.366   | 8.00  | 10.00  | 14.00  | 18.00  | 23.00   |  |  |
| 0.05                | 2.707 | 0.1806445 | 0.0092291 | 0.70 | 1.30 | 8.068   | 2.894   | 5.00  | 6.00   | 8.00   | 10.00  | 12.00  | 2.887 | 8.394   | 2.974   | 5.00  | 6.00   | 8.00   | 10.00  | 12.00   |  |  |
| 0.05                | 2.707 | 0.1806445 | 0.0092291 | 0.60 | 1.30 | 5.261   | 1.631   | 3.00  | 4.00   | 5.00   | 6.00   | 7.00   | 2.887 | 5.471   | 1.653   | 4.00  | 4.00   | 5.00   | 6.00   | 8.00    |  |  |
| 0.05                | 2.707 | 0.1806445 | 0.0092291 | 0.50 | 1.30 | 3.748   | 1.043   | 3.00  | 3.00   | 4.00   | 4.00   | 5.00   | 2.887 | 3.871   | 1.072   | 3.00  | 3.00   | 4.00   | 4.00   | 5.00    |  |  |
| 0.05                | 2.707 | 0.1806445 | 0.0092291 | 1.10 | 1.40 | 27.061  | 15.387  | 12.00 | 16.00  | 23.00  | 34.00  | 47.00  | 2.887 | 29.383  | 17.371  | 12.00 | 17.00  | 25.00  | 37.00  | 52.00   |  |  |
| 0.05                | 2.707 | 0.1806445 | 0.0092291 | 1.20 | 1.40 | 18.764  | 8.006   | 10.00 | 13.00  | 17.00  | 23.00  | 29.00  | 2.887 | 20.046  | 8.519   | 11.00 | 14.00  | 19.00  | 24.00  | 31.00   |  |  |
| 0.05                | 2.707 | 0.1806445 | 0.0092291 | 1.30 | 1.40 | 13.566  | 4.492   | 9.00  | 10.00  | 13.00  | 16.00  | 20.00  | 2.887 | 14.273  | 4.681   | 9.00  | 11.00  | 14.00  | 17.00  | 20.00   |  |  |
| 0.05                | 2.707 | 0.1806445 | 0.0092291 | 1.40 | 1.40 | 10.551  | 2.870   | 7.00  | 8.00   | 10.00  | 12.00  | 14.00  | 2.887 | 11.034  | 2.988   | 8.00  | 9.00   | 11.00  | 13.00  | 15.00   |  |  |
| 0.05                | 2.707 | 0.1806445 | 0.0092291 | 0.90 | 1.40 | 24.255  | 13.582  | 11.00 | 15.00  | 21.00  | 30.00  | 42.00  | 2.887 | 26.035  | 14.276  | 12.00 | 16.00  | 23.00  | 33.00  | 45.00   |  |  |
| 0.05                | 2.707 | 0.1806445 | 0.0092291 | 0.80 | 1.40 | 13.587  | 5.765   | 7.00  | 9.00   | 13.00  | 17.00  | 21.00  | 2.887 | 14.198  | 5.968   | 8.00  | 10.00  | 13.00  | 17.00  | 22.00   |  |  |
| 0.05                | 2.707 | 0.1806445 | 0.0092291 | 0.70 | 1.40 | 8.002   | 2.804   | 5.00  | 6.00   | 8.00   | 10.00  | 12.00  | 2.887 | 8.369   | 2.927   | 5.00  | 6.00   | 8.00   | 10.00  | 12.00   |  |  |
| 0.05                | 2.707 | 0.1806445 | 0.0092291 | 0.60 | 1.40 | 5.272   | 1.638   | 3.00  | 4.00   | 5.00   | 6.00   | 7.00   | 2.887 | 5.468   | 1.670   | 4.00  | 4.00   | 5.00   | 6.00   | 8.00    |  |  |
| 0.05                | 2.707 | 0.1806445 | 0.0092291 | 0.50 | 1.40 | 3.750   | 1.038   | 3.00  | 3.00   | 4.00   | 4.00   | 5.00   | 2.887 | 3.870   | 1.069   | 3.00  | 3.00   | 4.00   | 4.00   | 5.00    |  |  |
| 0.05                | 2.707 | 0.1806445 | 0.0092291 | 1.10 | 0.90 | 59.700  | 41.280  | 21.00 | 31.00  | 48.00  | 76.00  | 113.00 | 2.887 | 66.952  | 46.831  | 23.00 | 34.00  | 54.00  | 87.00  | 128.00  |  |  |
| 0.05                | 2.707 | 0.1806445 | 0.0092291 | 1.20 | 0.90 | 23.074  | 10.377  | 12.00 | 16.00  | 21.00  | 28.00  | 37.00  | 2.887 | 24.516  | 11.174  | 13.00 | 17.00  | 22.00  | 30.00  | 39.00   |  |  |
| 0.05                | 2.707 | 0.1806445 | 0.0092291 | 1.30 | 0.90 | 14.433  | 4.911   | 9.00  | 11.00  | 14.00  | 17.00  | 21.00  | 2.887 | 15.095  | 5.094   | 9.00  | 11.00  | 14.00  | 18.00  | 22.00   |  |  |
| 0.05                | 2.707 | 0.1806445 | 0.0092291 | 1.40 | 0.90 | 10.793  | 2.944   | 7.00  | 9.00   | 10.00  | 12.00  | 15.00  | 2.887 | 11.327  | 3.105   | 8.00  | 9.00   | 11.00  | 13.00  | 15.00   |  |  |
| 0.05                | 2.707 | 0.1806445 | 0.0092291 | 0.90 | 0.90 | 42.536  | 28.728  | 15.00 | 22.00  | 35.00  | 55.00  | 79.00  | 2.887 | 46.406  | 31.613  | 16    |        |        |        |         |  |  |

|      |       |           |           |      |      |         |         |       |        |        |        |        |       |         |         |       |        |        |        |         |
|------|-------|-----------|-----------|------|------|---------|---------|-------|--------|--------|--------|--------|-------|---------|---------|-------|--------|--------|--------|---------|
| 0.05 | 2.707 | 0.1806445 | 0.0092291 | 0.50 | 0.90 | 3.738   | 1.046   | 3.00  | 3.00   | 4.00   | 4.00   | 5.00   | 2.887 | 3.879   | 1.086   | 3.00  | 3.00   | 4.00   | 4.00   | 5.00    |
| 0.05 | 2.707 | 0.1806445 | 0.0092291 | 1.10 | 0.80 | 49.747  | 30.756  | 20.00 | 28.00  | 42.00  | 63.00  | 89.00  | 2.887 | 55.429  | 35.563  | 22.00 | 31.00  | 46.00  | 70.00  | 101.00  |
| 0.05 | 2.707 | 0.1806445 | 0.0092291 | 1.20 | 0.80 | 22.597  | 9.873   | 12.00 | 16.00  | 21.00  | 28.00  | 35.00  | 2.887 | 24.068  | 10.530  | 13.00 | 17.00  | 22.00  | 29.00  | 38.00   |
| 0.05 | 2.707 | 0.1806445 | 0.0092291 | 1.30 | 0.80 | 14.332  | 4.814   | 9.00  | 11.00  | 13.00  | 17.00  | 21.00  | 2.887 | 15.160  | 5.040   | 10.00 | 12.00  | 14.00  | 18.00  | 22.00   |
| 0.05 | 2.707 | 0.1806445 | 0.0092291 | 1.40 | 0.80 | 10.823  | 2.972   | 7.00  | 9.00   | 10.00  | 12.00  | 15.00  | 2.887 | 11.337  | 3.115   | 8.00  | 9.00   | 11.00  | 13.00  | 16.00   |
| 0.05 | 2.707 | 0.1806445 | 0.0092291 | 0.90 | 0.80 | 37.821  | 22.855  | 15.00 | 21.00  | 32.00  | 49.00  | 68.00  | 2.887 | 41.546  | 25.902  | 16.00 | 23.00  | 35.00  | 53.00  | 75.00   |
| 0.05 | 2.707 | 0.1806445 | 0.0092291 | 0.80 | 0.80 | 14.696  | 6.615   | 8.00  | 10.00  | 13.00  | 18.00  | 23.00  | 2.887 | 15.414  | 7.125   | 8.00  | 10.00  | 14.00  | 19.00  | 25.00   |
| 0.05 | 2.707 | 0.1806445 | 0.0092291 | 0.70 | 0.80 | 8.080   | 2.976   | 5.00  | 6.00   | 8.00   | 10.00  | 12.00  | 2.887 | 8.382   | 3.023   | 5.00  | 6.00   | 8.00   | 10.00  | 12.00   |
| 0.05 | 2.707 | 0.1806445 | 0.0092291 | 0.60 | 0.80 | 5.286   | 1.635   | 3.00  | 4.00   | 5.00   | 6.00   | 7.00   | 2.887 | 5.504   | 1.685   | 4.00  | 4.00   | 5.00   | 6.00   | 8.00    |
| 0.05 | 2.707 | 0.1806445 | 0.0092291 | 0.50 | 0.80 | 3.739   | 1.047   | 3.00  | 3.00   | 4.00   | 4.00   | 5.00   | 2.887 | 3.872   | 1.066   | 3.00  | 3.00   | 4.00   | 4.00   | 5.00    |
| 0.05 | 2.707 | 0.1806445 | 0.0092291 | 1.10 | 0.70 | 35.689  | 17.886  | 18.00 | 23.00  | 32.00  | 44.00  | 59.00  | 2.887 | 39.449  | 20.194  | 19.00 | 25.00  | 35.00  | 49.00  | 66.00   |
| 0.05 | 2.707 | 0.1806445 | 0.0092291 | 1.20 | 0.70 | 21.383  | 8.683   | 12.00 | 15.00  | 20.00  | 26.00  | 33.00  | 2.887 | 23.003  | 9.221   | 13.00 | 16.00  | 21.00  | 28.00  | 35.00   |
| 0.05 | 2.707 | 0.1806445 | 0.0092291 | 1.30 | 0.70 | 14.248  | 4.653   | 9.00  | 11.00  | 14.00  | 17.00  | 20.00  | 2.887 | 15.031  | 4.969   | 9.00  | 11.00  | 14.00  | 18.00  | 22.00   |
| 0.05 | 2.707 | 0.1806445 | 0.0092291 | 1.40 | 0.70 | 10.744  | 2.964   | 7.00  | 9.00   | 10.00  | 12.00  | 15.00  | 2.887 | 11.321  | 3.088   | 8.00  | 9.00   | 11.00  | 13.00  | 15.00   |
| 0.05 | 2.707 | 0.1806445 | 0.0092291 | 0.90 | 0.70 | 30.621  | 15.793  | 14.00 | 19.00  | 27.00  | 38.00  | 51.00  | 2.887 | 33.103  | 17.188  | 15.00 | 21.00  | 29.00  | 41.00  | 56.00   |
| 0.05 | 2.707 | 0.1806445 | 0.0092291 | 0.80 | 0.70 | 14.421  | 6.324   | 7.00  | 10.00  | 13.00  | 18.00  | 23.00  | 2.887 | 15.200  | 6.578   | 8.00  | 10.00  | 14.00  | 19.00  | 24.00   |
| 0.05 | 2.707 | 0.1806445 | 0.0092291 | 0.70 | 0.70 | 8.064   | 2.937   | 5.00  | 6.00   | 8.00   | 10.00  | 12.00  | 2.887 | 8.439   | 3.008   | 5.00  | 6.00   | 8.00   | 10.00  | 12.00   |
| 0.05 | 2.707 | 0.1806445 | 0.0092291 | 0.60 | 0.70 | 5.274   | 1.672   | 3.00  | 4.00   | 5.00   | 6.00   | 7.00   | 2.887 | 5.489   | 1.682   | 4.00  | 4.00   | 5.00   | 6.00   | 8.00    |
| 0.05 | 2.707 | 0.1806445 | 0.0092291 | 0.50 | 0.70 | 3.731   | 1.044   | 3.00  | 3.00   | 4.00   | 4.00   | 5.00   | 2.887 | 3.891   | 1.066   | 3.00  | 3.00   | 4.00   | 4.00   | 5.00    |
| 0.05 | 2.707 | 0.1806445 | 0.0092291 | 1.10 | 0.60 | 24.833  | 9.445   | 15.00 | 18.00  | 23.00  | 30.00  | 37.00  | 2.887 | 26.921  | 10.308  | 16.00 | 19.00  | 25.00  | 32.00  | 40.00   |
| 0.05 | 2.707 | 0.1806445 | 0.0092291 | 1.20 | 0.60 | 19.187  | 6.537   | 12.00 | 15.00  | 18.00  | 23.00  | 28.00  | 2.887 | 20.404  | 6.954   | 13.00 | 15.00  | 19.00  | 24.00  | 29.00   |
| 0.05 | 2.707 | 0.1806445 | 0.0092291 | 1.30 | 0.60 | 14.003  | 4.259   | 9.00  | 11.00  | 13.00  | 16.00  | 20.00  | 2.887 | 14.765  | 4.489   | 10.00 | 12.00  | 14.00  | 17.00  | 21.00   |
| 0.05 | 2.707 | 0.1806445 | 0.0092291 | 1.40 | 0.60 | 10.763  | 2.899   | 7.00  | 9.00   | 10.00  | 12.00  | 15.00  | 2.887 | 11.281  | 3.036   | 8.00  | 9.00   | 11.00  | 13.00  | 15.00   |
| 0.05 | 2.707 | 0.1806445 | 0.0092291 | 0.90 | 0.60 | 22.963  | 8.941   | 13.00 | 17.00  | 22.00  | 28.00  | 35.00  | 2.887 | 24.867  | 9.678   | 14.00 | 18.00  | 23.00  | 30.00  | 38.00   |
| 0.05 | 2.707 | 0.1806445 | 0.0092291 | 0.80 | 0.60 | 13.883  | 5.512   | 8.00  | 10.00  | 13.00  | 17.00  | 21.00  | 2.887 | 14.786  | 5.859   | 8.00  | 10.00  | 14.00  | 18.00  | 23.00   |
| 0.05 | 2.707 | 0.1806445 | 0.0092291 | 0.70 | 0.60 | 8.059   | 2.919   | 5.00  | 6.00   | 8.00   | 10.00  | 12.00  | 2.887 | 8.352   | 2.942   | 5.00  | 6.00   | 8.00   | 10.00  | 12.00   |
| 0.05 | 2.707 | 0.1806445 | 0.0092291 | 0.60 | 0.60 | 5.296   | 1.654   | 3.00  | 4.00   | 5.00   | 6.00   | 7.00   | 2.887 | 5.468   | 1.672   | 4.00  | 4.00   | 5.00   | 6.00   | 8.00    |
| 0.05 | 2.707 | 0.1806445 | 0.0092291 | 0.50 | 0.60 | 3.743   | 1.046   | 3.00  | 3.00   | 4.00   | 4.00   | 5.00   | 2.887 | 3.864   | 1.061   | 3.00  | 3.00   | 4.00   | 4.00   | 5.00    |
| 0.05 | 2.707 | 0.1806445 | 0.0092291 | 1.10 | 0.50 | 18.057  | 5.056   | 12.00 | 14.00  | 17.00  | 21.00  | 25.00  | 2.887 | 19.229  | 5.283   | 13.00 | 15.00  | 18.00  | 22.00  | 26.00   |
| 0.05 | 2.707 | 0.1806445 | 0.0092291 | 1.20 | 0.50 | 16.213  | 4.307   | 11.00 | 13.00  | 16.00  | 19.00  | 22.00  | 2.887 | 17.215  | 4.626   | 12.00 | 14.00  | 17.00  | 20.00  | 23.00   |
| 0.05 | 2.707 | 0.1806445 | 0.0092291 | 1.30 | 0.50 | 13.214  | 3.582   | 9.00  | 11.00  | 13.00  | 15.00  | 18.00  | 2.887 | 13.936  | 3.727   | 9.00  | 11.00  | 14.00  | 16.00  | 19.00   |
| 0.05 | 2.707 | 0.1806445 | 0.0092291 | 1.40 | 0.50 | 10.585  | 2.679   | 7.00  | 9.00   | 10.00  | 12.00  | 14.00  | 2.887 | 11.138  | 2.797   | 8.00  | 9.00   | 11.00  | 13.00  | 15.00   |
| 0.05 | 2.707 | 0.1806445 | 0.0092291 | 0.90 | 0.50 | 17.438  | 4.998   | 12.00 | 14.00  | 17.00  | 20.00  | 24.00  | 2.887 | 18.527  | 5.386   | 13.00 | 15.00  | 18.00  | 21.00  | 26.00   |
| 0.05 | 2.707 | 0.1806445 | 0.0092291 | 0.80 | 0.50 | 12.969  | 4.352   | 8.00  | 10.00  | 13.00  | 16.00  | 19.00  | 2.887 | 13.566  | 4.568   | 8.00  | 10.00  | 13.00  | 16.00  | 20.00   |
| 0.05 | 2.707 | 0.1806445 | 0.0092291 | 0.70 | 0.50 | 8.053   | 2.817   | 5.00  | 6.00   | 8.00   | 10.00  | 12.00  | 2.887 | 8.386   | 2.902   | 5.00  | 6.00   | 8.00   | 10.00  | 12.00   |
| 0.05 | 2.707 | 0.1806445 | 0.0092291 | 0.60 | 0.50 | 5.290   | 1.626   | 3.00  | 4.00   | 5.00   | 6.00   | 7.00   | 2.887 | 5.441   | 1.698   | 4.00  | 4.00   | 5.00   | 6.00   | 8.00    |
| 0.05 | 2.707 | 0.1806445 | 0.0092291 | 0.50 | 0.50 | 3.752   | 1.049   | 3.00  | 3.00   | 4.00   | 4.00   | 5.00   | 2.887 | 3.888   | 1.068   | 3.00  | 3.00   | 4.00   | 4.00   | 5.00    |
| 0.10 | 2.989 | 0.2591572 | 0.0188247 | 1.00 | 1.00 | 369.027 | 357.319 | 46.00 | 114.00 | 259.50 | 501.25 | 830.00 | 3.165 | 500.856 | 488.539 | 61.00 | 151.00 | 352.00 | 691.00 | 1156.00 |
| 0.10 | 2.989 | 0.2591572 | 0.0188247 | 1.10 | 1.10 | 68.451  | 58.172  | 17.00 | 28.00  | 50.00  | 92.00  | 146.00 | 3.165 | 82.555  | 70.397  | 20.00 | 33.00  | 61.00  | 109.00 | 174.00  |
| 0.10 | 2.989 | 0.2591572 | 0.0188247 | 1.20 | 1.10 | 23.898  | 14.282  | 10.00 | 14.00  | 20.00  | 30.00  | 42.00  | 3.165 | 26.094  | 15.883  | 11.00 | 15.00  | 22.00  | 33.00  | 47.00   |
| 0.10 | 2.989 | 0.2591572 | 0.0188247 | 1.30 | 1.10 | 13.458  | 5.849   | 7.00  | 9.00   | 12.00  | 16.00  | 21.00  | 3.165 | 14.444  | 6.446   | 8.00  | 10.00  | 13.00  | 17.00  | 23.00   |
| 0.10 | 2.989 | 0.2591572 | 0.0188247 | 1.40 | 1.10 | 9.565   | 3.344   | 6.00  | 7.00   | 9.00   | 11.00  | 14.00  | 3.165 | 10.126  | 3.563   | 6.00  | 8.00   | 9.00   | 12.00  | 15.00   |
| 0.10 | 2.989 | 0.2591572 | 0.0188247 | 0.90 | 1.10 | 42.151  | 33.375  | 11.00 | 19.00  | 33.00  | 55.00  | 86.00  | 3.165 | 48.222  | 39.002  | 13.00 | 21.00  | 37.00  | 64.00  | 99.00   |
| 0.10 | 2.989 | 0.2591572 | 0.0188247 | 0.80 | 1.10 | 13.215  | 7.357   | 6.00  | 8.00   | 11.00  | 16.00  | 23.00  | 3.165 | 14.159  | 7.922   | 6.00  | 9.00   | 12.00  | 18.00  | 25.00   |
| 0.10 | 2.989 | 0.2591572 | 0.0188247 | 0.70 | 1.10 | 6.820   | 2.937   | 4.00  | 5.00   | 6.00   | 8.00   | 11.00  | 3.165 | 7.178   | 3.144   | 4.00  | 5.00   | 7.00   | 9.00   | 11.00   |
| 0.10 | 2.989 | 0.2591572 | 0.0188247 | 0.60 | 1.10 | 4.343   | 1.576   | 3.00  | 3.00   | 4.00   | 5.00   | 6.00   | 3.165 | 4.535   | 1.643   | 3.00  | 3.00   | 4.00   | 5.00   | 7.00    |
| 0.10 | 2.989 | 0.2591572 | 0.0188247 | 0.50 | 1.10 | 3.045   | 0.982   | 2.00  | 2.00   | 3.00   | 4.00   | 4.00   | 3.165 | 3.149   | 1.001   | 2.00  | 2.00   | 3.00   | 4.00   | 4.00    |
| 0.10 | 2.989 | 0.2591572 | 0.0188247 | 1.10 | 1.20 | 50.941  | 40.496  | 14.00 | 22.75  | 39.00  | 67.00  | 104.00 | 3.165 | 58.432  | 46.920  | 15.00 | 25.00  | 44.00  | 77.00  | 122.00  |
| 0.10 | 2.989 | 0.2591572 | 0.0188247 | 1.20 | 1.20 | 22.226  | 12.888  | 10.00 | 13.00  | 19.00  | 28.00  | 39.00  | 3.165 | 24.420  | 14.488  | 10.00 | 14.00  | 21.00  | 30.00  | 43.00   |
| 0.10 | 2.989 | 0.2591572 | 0.0188247 | 1.30 | 1.20 | 13.216  | 5.803   | 7.00  | 9.00   | 12.00  | 16.00  | 21.00  | 3.165 | 14.180  | 6.278   | 8.00  | 10.00  | 13.00  | 17.00  | 23.00   |
| 0.10 | 2.989 | 0.2591572 | 0.0188247 | 1.40 | 1.20 | 9.554   | 3.417   | 6.00  | 7.00   | 9.00   | 11.00  | 14.00  | 3.165 | 10.063  | 3.469   | 6.00  | 8.00   | 9.00   | 12.00  | 15.00   |
| 0.10 | 2.989 | 0.2591572 | 0.0188247 | 0.90 | 1.20 | 34.730  | 26.123  | 10.00 | 16.00  | 27.00  | 45.00  | 68.00  | 3.165 | 39.133  | 30.596  | 11.00 | 18.00  | 30.00  | 51.00  | 78.00   |
| 0.10 | 2.989 | 0.2591572 | 0.0188247 | 0.80 | 1.20 | 13.032  | 7.188   | 6.00  | 8.00   | 11.00  | 16.00  | 23.00  | 3.165 | 13.869  | 7.709   | 6.00  | 8.00   | 12.00  | 17.00  | 24.00   |
| 0.10 | 2.989 | 0.2591572 | 0.0188247 | 0.70 | 1.20 | 6.829   | 2.934   | 4.00  | 5.00   | 6.00   | 8.00   | 11.00  | 3.165 | 7.091   | 3.004   | 4.00  | 5.00   | 7.00   | 9.00   | 11.00   |
| 0.10 | 2.989 | 0.2591572 | 0.0188247 | 0.60 | 1.20 | 4.360   | 1.570   | 3.00  | 3.00   | 4.00   | 5.00   | 6.00   | 3.165 | 4.502   | 1.610   | 3.00  | 3.00   | 4.00   | 5.00   | 7.00    |
| 0.10 | 2.989 | 0.2591572 | 0.0188247 | 0.50 | 1.20 | 3.051   | 0.959   | 2.00  | 2.00   | 3.00   | 4.00   | 4.00   | 3.165 | 3.155   | 1.000   | 2.00  | 2.00   | 3.00   | 4.00   | 4.00    |
| 0.10 | 2.989 | 0.2591572 | 0.0188247 | 1.10 | 1.30 | 36.095  | 27.120  | 11.00 | 17.00  | 28.00  | 47.00  | 71.00  |       |         |         |       |        |        |        |         |

|      |       |           |           |      |      |        |        |       |       |       |        |        |       |         |        |       |       |       |        |        |
|------|-------|-----------|-----------|------|------|--------|--------|-------|-------|-------|--------|--------|-------|---------|--------|-------|-------|-------|--------|--------|
| 0.10 | 2.989 | 0.2591572 | 0.0188247 | 0.70 | 1.30 | 6.781  | 2.935  | 4.00  | 5.00  | 6.00  | 8.00   | 11.00  | 3.165 | 7.054   | 2.983  | 4.00  | 5.00  | 7.00  | 9.00   | 11.00  |
| 0.10 | 2.989 | 0.2591572 | 0.0188247 | 0.60 | 1.30 | 4.323  | 1.565  | 3.00  | 3.00  | 4.00  | 5.00   | 6.00   | 3.165 | 4.506   | 1.619  | 3.00  | 3.00  | 4.00  | 5.00   | 7.00   |
| 0.10 | 2.989 | 0.2591572 | 0.0188247 | 0.50 | 1.30 | 3.041  | 0.978  | 2.00  | 2.00  | 3.00  | 4.00   | 4.00   | 3.165 | 3.154   | 1.003  | 2.00  | 2.00  | 3.00  | 4.00   | 4.00   |
| 0.10 | 2.989 | 0.2591572 | 0.0188247 | 1.10 | 1.40 | 26.562 | 18.459 | 9.00  | 14.00 | 22.00 | 34.00  | 51.00  | 3.165 | 29.423  | 21.371 | 10.00 | 14.00 | 24.00 | 38.00  | 57.00  |
| 0.10 | 2.989 | 0.2591572 | 0.0188247 | 1.20 | 1.40 | 17.756 | 9.830  | 8.00  | 11.00 | 15.00 | 22.00  | 31.00  | 3.165 | 19.602  | 11.166 | 9.00  | 12.00 | 17.00 | 24.25  | 34.00  |
| 0.10 | 2.989 | 0.2591572 | 0.0188247 | 1.30 | 1.40 | 12.183 | 5.271  | 7.00  | 8.00  | 11.00 | 15.00  | 19.00  | 3.165 | 13.093  | 5.599  | 7.00  | 9.00  | 12.00 | 16.00  | 20.00  |
| 0.10 | 2.989 | 0.2591572 | 0.0188247 | 1.40 | 1.40 | 9.257  | 3.204  | 6.00  | 7.00  | 9.00  | 11.00  | 14.00  | 3.165 | 9.760   | 3.381  | 6.00  | 7.00  | 9.00  | 11.00  | 14.00  |
| 0.10 | 2.989 | 0.2591572 | 0.0188247 | 0.90 | 1.40 | 22.778 | 15.609 | 8.00  | 12.00 | 19.00 | 29.00  | 43.00  | 3.165 | 24.854  | 17.193 | 9.00  | 13.00 | 20.00 | 32.00  | 47.00  |
| 0.10 | 2.989 | 0.2591572 | 0.0188247 | 0.80 | 1.40 | 11.709 | 6.054  | 6.00  | 7.00  | 10.00 | 15.00  | 20.00  | 3.165 | 12.588  | 6.521  | 6.00  | 8.00  | 11.00 | 16.00  | 21.00  |
| 0.10 | 2.989 | 0.2591572 | 0.0188247 | 0.70 | 1.40 | 6.696  | 2.767  | 4.00  | 5.00  | 6.00  | 8.00   | 10.00  | 3.165 | 6.962   | 2.887  | 4.00  | 5.00  | 6.00  | 8.00   | 11.00  |
| 0.10 | 2.989 | 0.2591572 | 0.0188247 | 0.60 | 1.40 | 4.359  | 1.569  | 3.00  | 3.00  | 4.00  | 5.00   | 6.00   | 3.165 | 4.511   | 1.603  | 3.00  | 3.00  | 4.00  | 5.00   | 7.00   |
| 0.10 | 2.989 | 0.2591572 | 0.0188247 | 0.50 | 1.40 | 3.066  | 0.989  | 2.00  | 2.00  | 3.00  | 4.00   | 4.00   | 3.165 | 3.154   | 1.000  | 2.00  | 2.00  | 3.00  | 4.00   | 4.00   |
| 0.10 | 2.989 | 0.2591572 | 0.0188247 | 1.10 | 0.90 | 82.560 | 71.350 | 19.00 | 33.00 | 61.00 | 109.00 | 173.00 | 3.165 | 100.405 | 87.896 | 22.00 | 39.00 | 74.00 | 135.00 | 212.00 |
| 0.10 | 2.989 | 0.2591572 | 0.0188247 | 1.20 | 0.90 | 24.617 | 14.822 | 10.00 | 14.00 | 21.00 | 31.00  | 44.00  | 3.165 | 26.685  | 16.328 | 11.00 | 15.00 | 22.00 | 34.00  | 48.00  |
| 0.10 | 2.989 | 0.2591572 | 0.0188247 | 1.30 | 0.90 | 13.615 | 6.117  | 7.00  | 9.00  | 12.00 | 16.00  | 21.00  | 3.165 | 14.522  | 6.537  | 8.00  | 10.00 | 13.00 | 18.00  | 23.00  |
| 0.10 | 2.989 | 0.2591572 | 0.0188247 | 1.40 | 0.90 | 9.591  | 3.386  | 6.00  | 7.00  | 9.00  | 11.00  | 14.00  | 3.165 | 10.244  | 3.654  | 6.00  | 8.00  | 10.00 | 12.00  | 15.00  |
| 0.10 | 2.989 | 0.2591572 | 0.0188247 | 0.90 | 0.90 | 46.572 | 38.487 | 12.00 | 20.00 | 35.00 | 61.00  | 95.00  | 3.165 | 53.400  | 44.465 | 13.00 | 22.00 | 40.00 | 71.00  | 111.00 |
| 0.10 | 2.989 | 0.2591572 | 0.0188247 | 0.80 | 0.90 | 13.466 | 7.612  | 6.00  | 8.00  | 12.00 | 17.00  | 24.00  | 3.165 | 14.338  | 8.184  | 6.00  | 9.00  | 12.00 | 18.00  | 25.00  |
| 0.10 | 2.989 | 0.2591572 | 0.0188247 | 0.70 | 0.90 | 6.838  | 3.025  | 4.00  | 5.00  | 6.00  | 8.00   | 11.00  | 3.165 | 7.168   | 3.090  | 4.00  | 5.00  | 7.00  | 9.00   | 11.00  |
| 0.10 | 2.989 | 0.2591572 | 0.0188247 | 0.60 | 0.90 | 4.350  | 1.600  | 3.00  | 3.00  | 4.00  | 5.00   | 6.00   | 3.165 | 4.521   | 1.652  | 3.00  | 3.00  | 4.00  | 5.00   | 7.00   |
| 0.10 | 2.989 | 0.2591572 | 0.0188247 | 0.50 | 0.90 | 3.053  | 0.972  | 2.00  | 2.00  | 3.00  | 4.00   | 4.00   | 3.165 | 3.155   | 1.005  | 2.00  | 2.00  | 3.00  | 4.00   | 4.00   |
| 0.10 | 2.989 | 0.2591572 | 0.0188247 | 1.10 | 0.80 | 69.082 | 55.962 | 19.00 | 30.00 | 52.00 | 90.00  | 142.00 | 3.165 | 83.995  | 69.177 | 21.00 | 35.00 | 63.00 | 112.00 | 174.00 |
| 0.10 | 2.989 | 0.2591572 | 0.0188247 | 1.20 | 0.80 | 23.842 | 13.900 | 10.00 | 14.00 | 20.00 | 30.00  | 42.00  | 3.165 | 26.619  | 16.236 | 11.00 | 15.00 | 22.00 | 33.00  | 48.00  |
| 0.10 | 2.989 | 0.2591572 | 0.0188247 | 1.30 | 0.80 | 13.561 | 5.966  | 7.00  | 9.00  | 12.00 | 16.00  | 21.00  | 3.165 | 14.560  | 6.499  | 8.00  | 10.00 | 13.00 | 18.00  | 23.00  |
| 0.10 | 2.989 | 0.2591572 | 0.0188247 | 1.40 | 0.80 | 9.630  | 3.407  | 6.00  | 7.00  | 9.00  | 11.00  | 14.00  | 3.165 | 10.147  | 3.590  | 6.00  | 8.00  | 9.00  | 12.00  | 15.00  |
| 0.10 | 2.989 | 0.2591572 | 0.0188247 | 0.90 | 0.80 | 43.049 | 33.415 | 12.00 | 20.00 | 34.00 | 56.00  | 86.00  | 3.165 | 48.259  | 38.274 | 13.00 | 21.00 | 38.00 | 63.00  | 97.00  |
| 0.10 | 2.989 | 0.2591572 | 0.0188247 | 0.80 | 0.80 | 13.432 | 7.658  | 6.00  | 8.00  | 12.00 | 17.00  | 23.00  | 3.165 | 14.321  | 8.051  | 6.00  | 9.00  | 12.00 | 18.00  | 25.00  |
| 0.10 | 2.989 | 0.2591572 | 0.0188247 | 0.70 | 0.80 | 6.855  | 2.944  | 4.00  | 5.00  | 6.00  | 8.00   | 11.00  | 3.165 | 7.182   | 3.084  | 4.00  | 5.00  | 7.00  | 9.00   | 11.00  |
| 0.10 | 2.989 | 0.2591572 | 0.0188247 | 0.60 | 0.80 | 4.351  | 1.549  | 3.00  | 3.00  | 4.00  | 5.00   | 6.00   | 3.165 | 4.525   | 1.652  | 3.00  | 3.00  | 4.00  | 5.00   | 7.00   |
| 0.10 | 2.989 | 0.2591572 | 0.0188247 | 0.50 | 0.80 | 3.055  | 0.992  | 2.00  | 2.00  | 3.00  | 4.00   | 4.00   | 3.165 | 3.129   | 0.991  | 2.00  | 2.00  | 3.00  | 4.00   | 4.00   |
| 0.10 | 2.989 | 0.2591572 | 0.0188247 | 1.10 | 0.70 | 47.745 | 34.197 | 16.00 | 24.00 | 38.00 | 61.00  | 92.00  | 3.165 | 56.738  | 42.566 | 18.00 | 27.00 | 44.00 | 73.00  | 111.00 |
| 0.10 | 2.989 | 0.2591572 | 0.0188247 | 1.20 | 0.70 | 22.652 | 12.728 | 10.00 | 14.00 | 20.00 | 28.00  | 39.00  | 3.165 | 25.189  | 14.491 | 11.00 | 15.00 | 22.00 | 31.00  | 44.00  |
| 0.10 | 2.989 | 0.2591572 | 0.0188247 | 1.30 | 0.70 | 13.419 | 5.790  | 7.00  | 9.00  | 12.00 | 16.00  | 21.00  | 3.165 | 14.455  | 6.368  | 8.00  | 10.00 | 13.00 | 17.00  | 23.00  |
| 0.10 | 2.989 | 0.2591572 | 0.0188247 | 1.40 | 0.70 | 9.586  | 3.330  | 6.00  | 7.00  | 9.00  | 11.00  | 14.00  | 3.165 | 10.104  | 3.548  | 6.00  | 8.00  | 9.00  | 12.00  | 15.00  |
| 0.10 | 2.989 | 0.2591572 | 0.0188247 | 0.90 | 0.70 | 35.020 | 24.903 | 12.00 | 18.00 | 28.00 | 45.00  | 68.00  | 3.165 | 39.637  | 28.612 | 13.00 | 19.00 | 32.00 | 52.00  | 77.00  |
| 0.10 | 2.989 | 0.2591572 | 0.0188247 | 0.80 | 0.70 | 13.146 | 7.135  | 6.00  | 8.00  | 12.00 | 17.00  | 23.00  | 3.165 | 14.007  | 7.674  | 6.00  | 9.00  | 12.00 | 17.00  | 24.00  |
| 0.10 | 2.989 | 0.2591572 | 0.0188247 | 0.70 | 0.70 | 6.856  | 2.954  | 4.00  | 5.00  | 6.00  | 8.00   | 11.00  | 3.165 | 7.119   | 3.029  | 4.00  | 5.00  | 7.00  | 9.00   | 11.00  |
| 0.10 | 2.989 | 0.2591572 | 0.0188247 | 0.60 | 0.70 | 4.325  | 1.575  | 3.00  | 3.00  | 4.00  | 5.00   | 6.00   | 3.165 | 4.546   | 1.646  | 3.00  | 3.00  | 4.00  | 5.00   | 7.00   |
| 0.10 | 2.989 | 0.2591572 | 0.0188247 | 0.50 | 0.70 | 3.044  | 0.973  | 2.00  | 2.00  | 3.00  | 4.00   | 4.00   | 3.165 | 3.156   | 1.011  | 2.00  | 2.00  | 3.00  | 4.00   | 4.00   |
| 0.10 | 2.989 | 0.2591572 | 0.0188247 | 1.10 | 0.60 | 29.996 | 17.208 | 13.00 | 18.00 | 26.00 | 37.00  | 52.00  | 3.165 | 34.147  | 20.509 | 15.00 | 20.00 | 29.00 | 43.00  | 61.00  |
| 0.10 | 2.989 | 0.2591572 | 0.0188247 | 1.20 | 0.60 | 19.696 | 9.368  | 10.00 | 13.00 | 18.00 | 24.00  | 32.00  | 3.165 | 21.738  | 10.848 | 11.00 | 14.00 | 19.00 | 27.00  | 36.00  |
| 0.10 | 2.989 | 0.2591572 | 0.0188247 | 1.30 | 0.60 | 13.078 | 5.223  | 7.00  | 9.00  | 12.00 | 16.00  | 20.00  | 3.165 | 13.970  | 5.714  | 8.00  | 10.00 | 13.00 | 17.00  | 21.00  |
| 0.10 | 2.989 | 0.2591572 | 0.0188247 | 1.40 | 0.60 | 9.578  | 3.306  | 6.00  | 7.00  | 9.00  | 11.00  | 14.00  | 3.165 | 10.047  | 3.424  | 6.00  | 8.00  | 9.00  | 12.00  | 14.00  |
| 0.10 | 2.989 | 0.2591572 | 0.0188247 | 0.90 | 0.60 | 25.300 | 14.401 | 11.00 | 15.00 | 22.00 | 32.00  | 44.00  | 3.165 | 28.442  | 16.806 | 12.00 | 17.00 | 24.00 | 36.00  | 51.00  |
| 0.10 | 2.989 | 0.2591572 | 0.0188247 | 0.80 | 0.60 | 12.569 | 6.416  | 6.00  | 8.00  | 11.00 | 16.00  | 21.00  | 3.165 | 13.611  | 6.973  | 6.00  | 9.00  | 12.00 | 17.00  | 23.00  |
| 0.10 | 2.989 | 0.2591572 | 0.0188247 | 0.70 | 0.60 | 6.838  | 2.906  | 4.00  | 5.00  | 6.00  | 8.00   | 11.00  | 3.165 | 7.174   | 3.073  | 4.00  | 5.00  | 7.00  | 9.00   | 11.00  |
| 0.10 | 2.989 | 0.2591572 | 0.0188247 | 0.60 | 0.60 | 4.342  | 1.566  | 3.00  | 3.00  | 4.00  | 5.00   | 6.00   | 3.165 | 4.502   | 1.624  | 3.00  | 3.00  | 4.00  | 5.00   | 7.00   |
| 0.10 | 2.989 | 0.2591572 | 0.0188247 | 0.50 | 0.60 | 3.049  | 0.975  | 2.00  | 2.00  | 3.00  | 4.00   | 4.00   | 3.165 | 3.148   | 0.995  | 2.00  | 2.00  | 3.00  | 4.00   | 4.00   |
| 0.10 | 2.989 | 0.2591572 | 0.0188247 | 1.10 | 0.50 | 19.166 | 7.892  | 11.00 | 14.00 | 17.00 | 23.00  | 29.00  | 3.165 | 21.078  | 8.980  | 12.00 | 15.00 | 19.00 | 25.00  | 33.00  |
| 0.10 | 2.989 | 0.2591572 | 0.0188247 | 1.20 | 0.50 | 16.109 | 6.195  | 9.00  | 12.00 | 15.00 | 19.00  | 24.00  | 3.165 | 17.346  | 6.846  | 10.00 | 13.00 | 16.00 | 21.00  | 26.00  |
| 0.10 | 2.989 | 0.2591572 | 0.0188247 | 1.30 | 0.50 | 12.238 | 4.382  | 7.00  | 9.00  | 12.00 | 15.00  | 18.00  | 3.165 | 13.011  | 4.677  | 8.00  | 10.00 | 12.00 | 15.00  | 19.00  |
| 0.10 | 2.989 | 0.2591572 | 0.0188247 | 1.40 | 0.50 | 9.389  | 3.011  | 6.00  | 7.00  | 9.00  | 11.00  | 13.00  | 3.165 | 9.974   | 3.231  | 6.00  | 8.00  | 9.00  | 12.00  | 14.00  |
| 0.10 | 2.989 | 0.2591572 | 0.0188247 | 0.90 | 0.50 | 17.727 | 7.426  | 10.00 | 13.00 | 16.00 | 21.00  | 27.00  | 3.165 | 19.428  | 8.522  | 11.00 | 14.00 | 18.00 | 23.00  | 31.00  |
| 0.10 | 2.989 | 0.2591572 | 0.0188247 | 0.80 | 0.50 | 11.593 | 5.149  | 6.00  | 8.00  | 11.00 | 14.00  | 18.00  | 3.165 | 12.419  | 5.528  | 6.00  | 8.00  | 12.00 | 15.00  | 20.00  |
| 0.10 | 2.989 | 0.2591572 | 0.0188247 | 0.70 | 0.50 | 6.865  | 2.856  | 4.00  | 5.00  | 6.00  | 8.00   | 11.00  | 3.165 | 7.114   | 2.978  | 4.00  | 5.00  | 7.00  | 9.00   | 11.00  |
| 0.10 | 2.989 | 0.2591572 | 0.0188247 | 0.60 | 0.50 | 4.372  | 1.607  | 3.00  | 3.00  | 4.00  | 5.00   | 6.00   | 3.165 | 4.504   | 1.603  | 3.00  | 3.00  | 4.00  | 5.00   | 7.00   |
| 0.10 | 2.989 | 0.2591572 | 0.0188247 | 0.50 | 0.50 | 3.043  | 0.970  | 2.00  | 2.00  | 3.00  | 4.00   | 4.00   | 3.165 | 3.147   | 0.988  | 2.00  | 2.00  | 3.00  | 4.     |        |

|      |       |           |           |      |      |         |         |       |       |       |        |        |       |         |         |       |       |        |        |        |
|------|-------|-----------|-----------|------|------|---------|---------|-------|-------|-------|--------|--------|-------|---------|---------|-------|-------|--------|--------|--------|
| 0.15 | 3.117 | 0.3219652 | 0.0288123 | 0.90 | 1.10 | 45.098  | 38.413  | 10.00 | 18.00 | 34.00 | 60.00  | 96.00  | 3.290 | 52.118  | 45.837  | 11.00 | 20.00 | 38.00  | 70.00  | 111.00 |
| 0.15 | 3.117 | 0.3219652 | 0.0288123 | 0.80 | 1.10 | 13.118  | 8.465   | 5.00  | 7.00  | 11.00 | 17.00  | 24.00  | 3.290 | 14.005  | 9.138   | 5.00  | 8.00  | 12.00  | 18.00  | 26.00  |
| 0.15 | 3.117 | 0.3219652 | 0.0288123 | 0.70 | 1.10 | 6.353   | 3.106   | 3.00  | 4.00  | 6.00  | 8.00   | 10.00  | 3.290 | 6.678   | 3.280   | 3.00  | 4.00  | 6.00   | 8.00   | 11.00  |
| 0.15 | 3.117 | 0.3219652 | 0.0288123 | 0.60 | 1.10 | 3.917   | 1.548   | 2.00  | 3.00  | 4.00  | 5.00   | 6.00   | 3.290 | 4.080   | 1.612   | 2.00  | 3.00  | 4.00   | 5.00   | 6.00   |
| 0.15 | 3.117 | 0.3219652 | 0.0288123 | 0.50 | 1.10 | 2.709   | 0.939   | 2.00  | 2.00  | 3.00  | 3.00   | 4.00   | 3.290 | 2.807   | 0.970   | 2.00  | 2.00  | 3.00   | 3.00   | 4.00   |
| 0.15 | 3.117 | 0.3219652 | 0.0288123 | 1.10 | 1.20 | 59.237  | 51.611  | 13.00 | 23.00 | 44.00 | 79.00  | 125.00 | 3.290 | 71.070  | 63.869  | 15.00 | 26.00 | 52.00  | 95.00  | 154.00 |
| 0.15 | 3.117 | 0.3219652 | 0.0288123 | 1.20 | 1.20 | 25.343  | 17.791  | 9.00  | 13.00 | 21.00 | 32.00  | 48.00  | 3.290 | 28.770  | 20.357  | 10.00 | 14.00 | 23.00  | 37.00  | 56.00  |
| 0.15 | 3.117 | 0.3219652 | 0.0288123 | 1.30 | 1.20 | 13.769  | 7.294   | 7.00  | 9.00  | 12.00 | 17.00  | 23.00  | 3.290 | 14.971  | 8.251   | 7.00  | 9.00  | 13.00  | 18.00  | 26.00  |
| 0.15 | 3.117 | 0.3219652 | 0.0288123 | 1.40 | 1.20 | 9.354   | 4.049   | 5.00  | 7.00  | 8.00  | 11.00  | 15.00  | 3.290 | 10.029  | 4.402   | 6.00  | 7.00  | 9.00   | 12.00  | 16.00  |
| 0.15 | 3.117 | 0.3219652 | 0.0288123 | 0.90 | 1.20 | 37.037  | 30.577  | 9.00  | 16.00 | 28.00 | 49.00  | 78.00  | 3.290 | 42.335  | 35.302  | 10.00 | 17.00 | 32.00  | 56.00  | 89.00  |
| 0.15 | 3.117 | 0.3219652 | 0.0288123 | 0.80 | 1.20 | 12.666  | 8.051   | 5.00  | 7.00  | 11.00 | 16.00  | 23.00  | 3.290 | 13.376  | 8.507   | 5.00  | 7.00  | 11.00  | 17.00  | 24.00  |
| 0.15 | 3.117 | 0.3219652 | 0.0288123 | 0.70 | 1.20 | 6.327   | 3.090   | 3.00  | 4.00  | 6.00  | 8.00   | 10.00  | 3.290 | 6.648   | 3.234   | 3.00  | 4.00  | 6.00   | 8.00   | 11.00  |
| 0.15 | 3.117 | 0.3219652 | 0.0288123 | 0.60 | 1.20 | 3.932   | 1.566   | 2.00  | 3.00  | 4.00  | 5.00   | 6.00   | 3.290 | 4.084   | 1.641   | 2.00  | 3.00  | 4.00   | 5.00   | 6.00   |
| 0.15 | 3.117 | 0.3219652 | 0.0288123 | 0.50 | 1.20 | 2.711   | 0.940   | 2.00  | 2.00  | 3.00  | 3.00   | 4.00   | 3.290 | 2.804   | 0.972   | 2.00  | 2.00  | 3.00   | 3.00   | 4.00   |
| 0.15 | 3.117 | 0.3219652 | 0.0288123 | 1.10 | 1.30 | 38.973  | 32.207  | 10.00 | 16.00 | 30.00 | 51.00  | 80.00  | 3.290 | 45.661  | 38.416  | 11.00 | 19.00 | 34.00  | 60.00  | 95.00  |
| 0.15 | 3.117 | 0.3219652 | 0.0288123 | 1.20 | 1.30 | 21.928  | 14.807  | 8.00  | 11.00 | 18.00 | 28.00  | 41.00  | 3.290 | 24.478  | 16.767  | 9.00  | 13.00 | 20.00  | 32.00  | 46.00  |
| 0.15 | 3.117 | 0.3219652 | 0.0288123 | 1.30 | 1.30 | 13.149  | 7.002   | 6.00  | 8.00  | 11.00 | 16.00  | 22.00  | 3.290 | 14.254  | 7.721   | 7.00  | 9.00  | 12.00  | 18.00  | 24.00  |
| 0.15 | 3.117 | 0.3219652 | 0.0288123 | 1.40 | 1.30 | 9.124   | 3.844   | 5.00  | 6.00  | 8.00  | 11.00  | 14.00  | 3.290 | 9.825   | 4.186   | 6.00  | 7.00  | 9.00   | 12.00  | 15.00  |
| 0.15 | 3.117 | 0.3219652 | 0.0288123 | 0.90 | 1.30 | 28.916  | 23.056  | 8.00  | 13.00 | 22.00 | 38.00  | 59.00  | 3.290 | 32.865  | 27.178  | 9.00  | 14.00 | 25.00  | 43.00  | 67.00  |
| 0.15 | 3.117 | 0.3219652 | 0.0288123 | 0.80 | 1.30 | 12.175  | 7.492   | 5.00  | 7.00  | 10.00 | 15.00  | 22.00  | 3.290 | 12.999  | 8.017   | 5.00  | 7.00  | 11.00  | 17.00  | 23.00  |
| 0.15 | 3.117 | 0.3219652 | 0.0288123 | 0.70 | 1.30 | 6.208   | 2.972   | 3.00  | 4.00  | 6.00  | 8.00   | 10.00  | 3.290 | 6.533   | 3.133   | 3.00  | 4.00  | 6.00   | 8.00   | 11.00  |
| 0.15 | 3.117 | 0.3219652 | 0.0288123 | 0.60 | 1.30 | 3.915   | 1.576   | 2.00  | 3.00  | 4.00  | 5.00   | 6.00   | 3.290 | 4.059   | 1.603   | 2.00  | 3.00  | 4.00   | 5.00   | 6.00   |
| 0.15 | 3.117 | 0.3219652 | 0.0288123 | 0.50 | 1.30 | 2.719   | 0.938   | 2.00  | 2.00  | 3.00  | 3.00   | 4.00   | 3.290 | 2.804   | 0.961   | 2.00  | 2.00  | 3.00   | 3.00   | 4.00   |
| 0.15 | 3.117 | 0.3219652 | 0.0288123 | 1.10 | 1.40 | 27.502  | 21.930  | 8.00  | 12.00 | 21.00 | 36.00  | 55.00  | 3.290 | 31.215  | 24.868  | 8.00  | 14.00 | 24.00  | 40.00  | 64.00  |
| 0.15 | 3.117 | 0.3219652 | 0.0288123 | 1.20 | 1.40 | 19.011  | 12.547  | 7.00  | 10.00 | 16.00 | 24.00  | 35.00  | 3.290 | 20.882  | 13.780  | 8.00  | 11.00 | 17.00  | 27.00  | 39.00  |
| 0.15 | 3.117 | 0.3219652 | 0.0288123 | 1.30 | 1.40 | 12.329  | 6.455   | 6.00  | 8.00  | 11.00 | 15.00  | 21.00  | 3.290 | 13.383  | 7.033   | 6.00  | 8.00  | 12.00  | 16.00  | 23.00  |
| 0.15 | 3.117 | 0.3219652 | 0.0288123 | 1.40 | 1.40 | 8.883   | 3.642   | 5.00  | 6.00  | 8.00  | 11.00  | 14.00  | 3.290 | 9.503   | 3.863   | 5.00  | 7.00  | 9.00   | 11.00  | 15.00  |
| 0.15 | 3.117 | 0.3219652 | 0.0288123 | 0.90 | 1.40 | 22.781  | 17.332  | 7.00  | 11.00 | 18.00 | 29.00  | 45.00  | 3.290 | 25.173  | 19.538  | 7.00  | 12.00 | 19.00  | 33.00  | 51.00  |
| 0.15 | 3.117 | 0.3219652 | 0.0288123 | 0.80 | 1.40 | 11.325  | 6.786   | 5.00  | 6.00  | 10.00 | 14.00  | 20.00  | 3.290 | 12.117  | 7.283   | 5.00  | 7.00  | 10.00  | 15.00  | 22.00  |
| 0.15 | 3.117 | 0.3219652 | 0.0288123 | 0.70 | 1.40 | 6.187   | 2.903   | 3.00  | 4.00  | 6.00  | 8.00   | 10.00  | 3.290 | 6.510   | 3.112   | 3.00  | 4.00  | 6.00   | 8.00   | 11.00  |
| 0.15 | 3.117 | 0.3219652 | 0.0288123 | 0.60 | 1.40 | 3.897   | 1.564   | 2.00  | 3.00  | 4.00  | 5.00   | 6.00   | 3.290 | 4.073   | 1.639   | 2.00  | 3.00  | 4.00   | 5.00   | 6.00   |
| 0.15 | 3.117 | 0.3219652 | 0.0288123 | 0.50 | 1.40 | 2.718   | 0.934   | 2.00  | 2.00  | 3.00  | 3.00   | 4.00   | 3.290 | 2.808   | 0.971   | 2.00  | 2.00  | 3.00   | 3.00   | 4.00   |
| 0.15 | 3.117 | 0.3219652 | 0.0288123 | 1.10 | 0.90 | 119.654 | 112.394 | 21.00 | 41.00 | 85.00 | 161.00 | 262.10 | 3.290 | 155.758 | 146.599 | 25.00 | 51.75 | 111.50 | 211.00 | 345.00 |
| 0.15 | 3.117 | 0.3219652 | 0.0288123 | 1.20 | 0.90 | 29.624  | 21.438  | 10.00 | 15.00 | 23.50 | 38.00  | 58.00  | 3.290 | 34.068  | 25.609  | 11.00 | 16.00 | 27.00  | 44.00  | 66.10  |
| 0.15 | 3.117 | 0.3219652 | 0.0288123 | 1.30 | 0.90 | 14.375  | 7.866   | 7.00  | 9.00  | 12.00 | 18.00  | 25.00  | 3.290 | 15.583  | 8.668   | 7.00  | 10.00 | 13.00  | 19.00  | 27.00  |
| 0.15 | 3.117 | 0.3219652 | 0.0288123 | 1.40 | 0.90 | 9.421   | 3.965   | 5.00  | 7.00  | 9.00  | 11.00  | 15.00  | 3.290 | 10.112  | 4.361   | 6.00  | 7.00  | 9.00   | 12.00  | 16.00  |
| 0.15 | 3.117 | 0.3219652 | 0.0288123 | 0.90 | 0.90 | 51.539  | 44.968  | 11.00 | 20.00 | 38.00 | 69.00  | 110.00 | 3.290 | 59.202  | 52.490  | 12.00 | 22.00 | 44.00  | 80.00  | 127.00 |
| 0.15 | 3.117 | 0.3219652 | 0.0288123 | 0.80 | 0.90 | 13.406  | 8.680   | 5.00  | 7.00  | 11.00 | 17.00  | 25.00  | 3.290 | 14.318  | 9.419   | 5.00  | 8.00  | 12.00  | 18.00  | 26.00  |
| 0.15 | 3.117 | 0.3219652 | 0.0288123 | 0.70 | 0.90 | 6.381   | 3.178   | 3.00  | 4.00  | 6.00  | 8.00   | 10.00  | 3.290 | 6.670   | 3.290   | 3.00  | 4.00  | 6.00   | 8.00   | 11.00  |
| 0.15 | 3.117 | 0.3219652 | 0.0288123 | 0.60 | 0.90 | 3.932   | 1.595   | 2.00  | 3.00  | 4.00  | 5.00   | 6.00   | 3.290 | 4.057   | 1.638   | 2.00  | 3.00  | 4.00   | 5.00   | 6.00   |
| 0.15 | 3.117 | 0.3219652 | 0.0288123 | 0.50 | 0.90 | 2.715   | 0.954   | 2.00  | 2.00  | 3.00  | 3.00   | 4.00   | 3.290 | 2.804   | 0.978   | 2.00  | 2.00  | 3.00   | 3.00   | 4.00   |
| 0.15 | 3.117 | 0.3219652 | 0.0288123 | 1.10 | 0.80 | 105.137 | 96.828  | 19.00 | 38.00 | 77.00 | 139.25 | 229.00 | 3.290 | 137.353 | 128.851 | 24.00 | 47.00 | 98.00  | 185.00 | 302.00 |
| 0.15 | 3.117 | 0.3219652 | 0.0288123 | 1.20 | 0.80 | 29.072  | 21.004  | 10.00 | 14.00 | 23.00 | 37.00  | 56.00  | 3.290 | 33.495  | 24.815  | 11.00 | 16.00 | 26.00  | 44.00  | 66.10  |
| 0.15 | 3.117 | 0.3219652 | 0.0288123 | 1.30 | 0.80 | 14.463  | 7.850   | 7.00  | 9.00  | 13.00 | 18.00  | 25.00  | 3.290 | 15.518  | 8.694   | 7.00  | 10.00 | 13.00  | 19.00  | 26.00  |
| 0.15 | 3.117 | 0.3219652 | 0.0288123 | 1.40 | 0.80 | 9.513   | 4.037   | 5.00  | 7.00  | 9.00  | 11.00  | 15.00  | 3.290 | 10.134  | 4.402   | 6.00  | 7.00  | 9.00   | 12.00  | 16.00  |
| 0.15 | 3.117 | 0.3219652 | 0.0288123 | 0.90 | 0.80 | 48.627  | 41.179  | 11.00 | 19.00 | 36.00 | 66.00  | 103.00 | 3.290 | 56.704  | 49.708  | 12.00 | 22.00 | 42.00  | 76.00  | 120.00 |
| 0.15 | 3.117 | 0.3219652 | 0.0288123 | 0.80 | 0.80 | 13.389  | 8.750   | 5.00  | 7.00  | 11.00 | 17.00  | 25.00  | 3.290 | 14.209  | 9.202   | 5.00  | 8.00  | 12.00  | 18.00  | 26.00  |
| 0.15 | 3.117 | 0.3219652 | 0.0288123 | 0.70 | 0.80 | 6.395   | 3.170   | 3.00  | 4.00  | 6.00  | 8.00   | 11.00  | 3.290 | 6.613   | 3.232   | 3.00  | 4.00  | 6.00   | 8.00   | 11.00  |
| 0.15 | 3.117 | 0.3219652 | 0.0288123 | 0.60 | 0.80 | 3.911   | 1.568   | 2.00  | 3.00  | 4.00  | 5.00   | 6.00   | 3.290 | 4.077   | 1.661   | 2.00  | 3.00  | 4.00   | 5.00   | 6.00   |
| 0.15 | 3.117 | 0.3219652 | 0.0288123 | 0.50 | 0.80 | 2.734   | 0.962   | 2.00  | 2.00  | 3.00  | 3.00   | 4.00   | 3.290 | 2.799   | 0.975   | 2.00  | 2.00  | 3.00   | 3.00   | 4.00   |
| 0.15 | 3.117 | 0.3219652 | 0.0288123 | 1.10 | 0.70 | 77.523  | 66.120  | 18.00 | 30.00 | 58.00 | 105.00 | 164.00 | 3.290 | 101.187 | 89.157  | 20.00 | 38.00 | 74.00  | 137.00 | 219.00 |
| 0.15 | 3.117 | 0.3219652 | 0.0288123 | 1.20 | 0.70 | 27.197  | 19.009  | 10.00 | 14.00 | 22.00 | 35.00  | 52.00  | 3.290 | 31.726  | 23.040  | 11.00 | 16.00 | 25.00  | 41.00  | 61.00  |
| 0.15 | 3.117 | 0.3219652 | 0.0288123 | 1.30 | 0.70 | 14.136  | 7.473   | 7.00  | 9.00  | 12.00 | 18.00  | 24.00  | 3.290 | 15.392  | 8.513   | 7.00  | 9.00  | 13.00  | 19.00  | 27.00  |
| 0.15 | 3.117 | 0.3219652 | 0.0288123 | 1.40 | 0.70 | 9.445   | 3.982   | 5.00  | 7.00  | 9.00  | 11.00  | 15.00  | 3.290 | 10.203  | 4.337   | 6.00  | 7.00  | 9.00   | 12.00  | 16.00  |
| 0.15 | 3.117 | 0.3219652 | 0.0288123 | 0.90 | 0.70 | 42.719  | 34.918  | 11.00 | 18.00 | 33.00 | 57.00  | 87.00  | 3.290 | 49.723  | 41.745  | 12.00 | 20.00 | 37.00  | 66.00  | 105.00 |
| 0.15 | 3.117 | 0.3219652 | 0.0288123 | 0.80 | 0.70 | 13.140  | 8.354   | 5.00  | 7.00  | 11.00 | 17.00  | 24.00  | 3.290 | 14.207  | 9.137   | 5.00  | 8.00  | 12.00  | 18.00  | 26.00  |
| 0.15 | 3.117 | 0.3219652 | 0.0288123 | 0.70 | 0.70 | 6.308   | 3.061   | 3.00  | 4.00  | 6.00  | 8.00   | 10.00  | 3.290 | 6.686   | 3       |       |       |        |        |        |

|      |       |           |           |      |      |        |            |       |       |       |       |       |       |        |        |       |       |       |       |       |
|------|-------|-----------|-----------|------|------|--------|------------|-------|-------|-------|-------|-------|-------|--------|--------|-------|-------|-------|-------|-------|
| 0.15 | 3.117 | 0.3219652 | 0.0288123 | 1.40 | 0.60 | 9.430  | 3.944      | 5.00  | 7.00  | 9.00  | 11.00 | 14.00 | 3.290 | 10.088 | 4.266  | 6.00  | 7.00  | 9.00  | 12.00 | 16.00 |
| 0.15 | 3.117 | 0.3219652 | 0.0288123 | 0.90 | 0.60 | 32.239 | 23.578     | 10.00 | 16.00 | 26.00 | 41.00 | 63.00 | 3.290 | 38.518 | 29.146 | 12.00 | 18.00 | 30.00 | 51.00 | 77.00 |
| 0.15 | 3.117 | 0.3219652 | 0.0288123 | 0.80 | 0.60 | 12.722 | 7.696      | 5.00  | 7.00  | 11.00 | 16.00 | 23.00 | 3.290 | 13.586 | 8.323  | 5.00  | 8.00  | 12.00 | 17.00 | 24.00 |
| 0.15 | 3.117 | 0.3219652 | 0.0288123 | 0.70 | 0.60 | 6.296  | 3.104      | 3.00  | 4.00  | 6.00  | 8.00  | 10.00 | 3.290 | 6.658  | 3.245  | 3.00  | 4.00  | 6.00  | 8.00  | 11.00 |
| 0.15 | 3.117 | 0.3219652 | 0.0288123 | 0.60 | 0.60 | 3.910  | 1.574      | 2.00  | 3.00  | 4.00  | 5.00  | 6.00  | 3.290 | 4.070  | 1.625  | 2.00  | 3.00  | 4.00  | 5.00  | 6.00  |
| 0.15 | 3.117 | 0.3219652 | 0.0288123 | 0.50 | 0.60 | 2.726  | 0.956      | 2.00  | 2.00  | 3.00  | 3.00  | 4.00  | 3.290 | 2.802  | 0.974  | 2.00  | 2.00  | 3.00  | 3.00  | 4.00  |
| 0.15 | 3.117 | 0.3219652 | 0.0288123 | 1.10 | 0.50 | 24.824 | 14.509     | 11.00 | 15.00 | 21.00 | 31.00 | 44.00 | 3.290 | 29.592 | 18.642 | 13.00 | 17.00 | 24.00 | 37.00 | 53.00 |
| 0.15 | 3.117 | 0.3219652 | 0.0288123 | 1.20 | 0.50 | 18.889 | 9.884      | 9.00  | 12.00 | 16.00 | 23.00 | 32.00 | 3.290 | 21.332 | 11.586 | 10.00 | 13.00 | 18.00 | 27.00 | 37.00 |
| 0.15 | 3.117 | 0.3219652 | 0.0288123 | 1.30 | 0.50 | 12.900 | 5.896      | 7.00  | 9.00  | 12.00 | 16.00 | 21.00 | 3.290 | 14.048 | 6.580  | 7.00  | 9.00  | 13.00 | 17.00 | 23.00 |
| 0.15 | 3.117 | 0.3219652 | 0.0288123 | 1.40 | 0.50 | 9.353  | 3.777      | 5.00  | 7.00  | 9.00  | 11.00 | 14.00 | 3.290 | 9.907  | 4.001  | 6.00  | 7.00  | 9.00  | 12.00 | 15.00 |
| 0.15 | 3.117 | 0.3219652 | 0.0288123 | 0.90 | 0.50 | 21.575 | 12.765     | 9.00  | 13.00 | 18.00 | 27.00 | 38.00 | 3.290 | 25.093 | 15.634 | 10.00 | 14.00 | 21.00 | 31.00 | 45.00 |
| 0.15 | 3.117 | 0.3219652 | 0.0288123 | 0.80 | 0.50 | 11.747 | 6.372      | 5.00  | 7.00  | 11.00 | 15.00 | 20.00 | 3.290 | 12.821 | 7.058  | 5.00  | 8.00  | 11.00 | 16.00 | 22.00 |
| 0.15 | 3.117 | 0.3219652 | 0.0288123 | 0.70 | 0.50 | 6.276  | 3.021      | 3.00  | 4.00  | 6.00  | 8.00  | 10.00 | 3.290 | 6.638  | 3.166  | 3.00  | 4.00  | 6.00  | 8.00  | 11.00 |
| 0.15 | 3.117 | 0.3219652 | 0.0288123 | 0.60 | 0.50 | 3.928  | 1.589      | 2.00  | 3.00  | 4.00  | 5.00  | 6.00  | 3.290 | 4.042  | 1.597  | 2.00  | 3.00  | 4.00  | 5.00  | 6.00  |
| 0.10 | 3.117 | 0.3219652 | 0.0288123 | 0.50 | 0.50 | 2.720  | 5 0.955338 | 2.00  | 2.00  | 3.00  | 4.00  | 5.000 | 3.290 | 2.804  | 0.974  | 2.00  | 2.00  | 3.00  | 3.00  | 4.00  |

$ARL_0 = 370$

$ARL_0 = 500$

Case 4  
 $\phi=31$

|      |       |           |           |      |      |         |         |       |        |        |        |        |       |         |         |       |        |        |        |         |
|------|-------|-----------|-----------|------|------|---------|---------|-------|--------|--------|--------|--------|-------|---------|---------|-------|--------|--------|--------|---------|
| 0.05 | 2.704 | 0.1807397 | 0.0092360 | 1.00 | 1.00 | 370.385 | 354.100 | 54.00 | 122.00 | 260.00 | 510.00 | 825.00 | 2.898 | 500.880 | 489.431 | 70.00 | 153.00 | 350.00 | 693.00 | 1138.00 |
| 0.05 | 2.704 | 0.1807397 | 0.0092360 | 1.10 | 1.10 | 100.983 | 81.278  | 26.00 | 44.00  | 77.00  | 134.00 | 204.00 | 2.898 | 121.192 | 98.991  | 32.00 | 52.00  | 92.00  | 160.00 | 249.00  |
| 0.05 | 2.704 | 0.1807397 | 0.0092360 | 1.20 | 1.10 | 45.526  | 28.148  | 18.00 | 26.00  | 39.00  | 57.00  | 81.00  | 2.898 | 50.680  | 31.689  | 20.00 | 28.00  | 42.00  | 64.00  | 92.00   |
| 0.05 | 2.704 | 0.1807397 | 0.0092360 | 1.30 | 1.10 | 27.552  | 13.047  | 14.00 | 19.00  | 24.00  | 34.00  | 45.00  | 2.898 | 29.739  | 14.187  | 15.00 | 20.00  | 26.00  | 37.00  | 49.00   |
| 0.05 | 2.704 | 0.1807397 | 0.0092360 | 1.40 | 1.10 | 19.918  | 7.634   | 12.00 | 14.00  | 18.00  | 24.00  | 30.00  | 2.898 | 21.184  | 8.284   | 12.00 | 15.00  | 20.00  | 25.00  | 32.00   |
| 0.05 | 2.704 | 0.1807397 | 0.0092360 | 0.90 | 1.10 | 68.903  | 53.624  | 20.00 | 31.00  | 54.00  | 89.00  | 140.00 | 2.898 | 78.049  | 62.014  | 21.00 | 34.00  | 61.00  | 102.00 | 159.00  |
| 0.05 | 2.704 | 0.1807397 | 0.0092360 | 0.80 | 1.10 | 26.144  | 15.635  | 11.00 | 15.00  | 22.50  | 33.00  | 46.00  | 2.898 | 28.428  | 16.991  | 12.00 | 16.00  | 24.00  | 36.00  | 51.00   |
| 0.05 | 2.704 | 0.1807397 | 0.0092360 | 0.70 | 1.10 | 13.899  | 6.587   | 7.00  | 9.00   | 13.00  | 17.00  | 22.00  | 2.898 | 14.869  | 7.012   | 7.00  | 10.00  | 14.00  | 18.00  | 24.00   |
| 0.05 | 2.704 | 0.1807397 | 0.0092360 | 0.60 | 1.10 | 8.778   | 3.560   | 5.00  | 6.00   | 8.00   | 11.00  | 13.00  | 2.898 | 9.135   | 3.639   | 5.00  | 7.00   | 9.00   | 11.00  | 14.00   |
| 0.05 | 2.704 | 0.1807397 | 0.0092360 | 0.50 | 1.10 | 5.991   | 2.137   | 4.00  | 4.00   | 6.00   | 7.00   | 9.00   | 2.898 | 6.258   | 2.234   | 4.00  | 5.00   | 6.00   | 8.00   | 9.00    |
| 0.05 | 2.704 | 0.1807397 | 0.0092360 | 1.10 | 1.20 | 61.832  | 45.940  | 19.00 | 29.00  | 49.00  | 81.00  | 122.00 | 2.898 | 71.750  | 55.545  | 21.00 | 33.00  | 56.00  | 94.00  | 143.00  |
| 0.05 | 2.704 | 0.1807397 | 0.0092360 | 1.20 | 1.20 | 38.577  | 22.648  | 16.00 | 23.00  | 33.00  | 48.00  | 68.00  | 2.898 | 43.026  | 25.609  | 18.00 | 25.00  | 36.00  | 54.00  | 77.00   |
| 0.05 | 2.704 | 0.1807397 | 0.0092360 | 1.30 | 1.20 | 25.688  | 11.850  | 13.00 | 17.00  | 23.00  | 31.00  | 41.00  | 2.898 | 27.940  | 12.896  | 15.00 | 19.00  | 25.00  | 34.00  | 45.00   |
| 0.05 | 2.704 | 0.1807397 | 0.0092360 | 1.40 | 1.20 | 19.318  | 7.284   | 11.00 | 14.00  | 18.00  | 23.00  | 29.00  | 2.898 | 20.703  | 7.993   | 12.00 | 15.00  | 19.00  | 25.00  | 31.00   |
| 0.05 | 2.704 | 0.1807397 | 0.0092360 | 0.90 | 1.20 | 49.854  | 35.885  | 16.00 | 24.00  | 40.00  | 64.00  | 96.00  | 2.898 | 55.685  | 40.329  | 18.00 | 27.00  | 45.00  | 72.00  | 108.00  |
| 0.05 | 2.704 | 0.1807397 | 0.0092360 | 0.80 | 1.20 | 24.402  | 13.861  | 10.00 | 14.00  | 21.00  | 31.00  | 42.00  | 2.898 | 26.633  | 15.242  | 11.00 | 16.00  | 23.00  | 34.00  | 46.00   |
| 0.05 | 2.704 | 0.1807397 | 0.0092360 | 0.70 | 1.20 | 13.651  | 6.367   | 7.00  | 9.00   | 12.00  | 17.00  | 22.00  | 2.898 | 14.635  | 6.873   | 7.00  | 10.00  | 13.00  | 18.00  | 24.00   |
| 0.05 | 2.704 | 0.1807397 | 0.0092360 | 0.60 | 1.20 | 8.777   | 3.546   | 5.00  | 6.00   | 8.00   | 11.00  | 13.00  | 2.898 | 9.186   | 3.671   | 5.00  | 7.00   | 9.00   | 11.00  | 14.00   |
| 0.05 | 2.704 | 0.1807397 | 0.0092360 | 0.50 | 1.20 | 6.024   | 2.195   | 4.00  | 4.00   | 6.00   | 7.00   | 9.00   | 2.898 | 6.263   | 2.232   | 4.00  | 5.00   | 6.00   | 8.00   | 9.00    |
| 0.05 | 2.704 | 0.1807397 | 0.0092360 | 1.10 | 1.30 | 41.056  | 27.487  | 15.00 | 22.00  | 34.00  | 53.00  | 77.00  | 2.898 | 45.705  | 31.089  | 16.00 | 24.00  | 38.00  | 59.00  | 86.00   |
| 0.05 | 2.704 | 0.1807397 | 0.0092360 | 1.20 | 1.30 | 31.439  | 17.346  | 14.00 | 19.00  | 27.00  | 39.00  | 53.00  | 2.898 | 34.564  | 19.471  | 15.00 | 21.00  | 30.00  | 43.00  | 60.00   |
| 0.05 | 2.704 | 0.1807397 | 0.0092360 | 1.30 | 1.30 | 23.348  | 10.566  | 12.00 | 16.00  | 21.00  | 28.00  | 37.00  | 2.898 | 25.469  | 11.492  | 13.00 | 17.00  | 23.00  | 31.00  | 41.00   |
| 0.05 | 2.704 | 0.1807397 | 0.0092360 | 1.40 | 1.30 | 18.510  | 6.882   | 11.00 | 14.00  | 17.00  | 22.00  | 28.00  | 2.898 | 19.678  | 7.271   | 12.00 | 14.00  | 18.00  | 24.00  | 29.00   |
| 0.05 | 2.704 | 0.1807397 | 0.0092360 | 0.90 | 1.30 | 36.266  | 23.796  | 13.00 | 19.00  | 30.00  | 47.00  | 67.00  | 2.898 | 40.296  | 27.335  | 14.00 | 21.00  | 33.00  | 52.00  | 75.00   |
| 0.05 | 2.704 | 0.1807397 | 0.0092360 | 0.80 | 1.30 | 22.281  | 12.233  | 10.00 | 14.00  | 20.00  | 28.00  | 38.00  | 2.898 | 23.672  | 12.714  | 11.00 | 15.00  | 21.00  | 30.00  | 40.00   |
| 0.05 | 2.704 | 0.1807397 | 0.0092360 | 0.70 | 1.30 | 13.337  | 6.085   | 7.00  | 9.00   | 12.00  | 16.00  | 21.00  | 2.898 | 14.196  | 6.463   | 7.00  | 10.00  | 13.00  | 17.00  | 23.00   |
| 0.05 | 2.704 | 0.1807397 | 0.0092360 | 0.60 | 1.30 | 8.673   | 3.464   | 5.00  | 6.00   | 8.00   | 10.00  | 13.00  | 2.898 | 9.044   | 3.615   | 5.00  | 6.00   | 8.00   | 11.00  | 14.00   |
| 0.05 | 2.704 | 0.1807397 | 0.0092360 | 0.50 | 1.30 | 5.983   | 2.159   | 4.00  | 4.00   | 6.00   | 7.00   | 9.00   | 2.898 | 6.242   | 2.206   | 4.00  | 5.00   | 6.00   | 7.00   | 9.00    |
| 0.05 | 2.704 | 0.1807397 | 0.0092360 | 1.10 | 1.40 | 30.006  | 18.450  | 12.00 | 17.00  | 25.00  | 38.00  | 54.00  | 2.898 | 32.566  | 20.313  | 13.00 | 18.00  | 27.00  | 42.00  | 59.00   |
| 0.05 | 2.704 | 0.1807397 | 0.0092360 | 1.20 | 1.40 | 25.865  | 14.017  | 11.00 | 16.00  | 23.00  | 33.00  | 44.00  | 2.898 | 28.141  | 15.285  | 12.00 | 17.00  | 25.00  | 35.00  | 48.00   |
| 0.05 | 2.704 | 0.1807397 | 0.0092360 | 1.30 | 1.40 | 21.001  | 9.336   | 11.00 | 14.00  | 19.00  | 26.00  | 33.00  | 2.898 | 22.682  | 10.165  | 12.00 | 15.00  | 21.00  | 28.00  | 36.00   |
| 0.05 | 2.704 | 0.1807397 | 0.0092360 | 1.40 | 1.40 | 17.296  | 6.431   | 10.00 | 13.00  | 16.00  | 21.00  | 26.00  | 2.898 | 18.415  | 6.890   | 11.00 | 14.00  | 17.00  | 22.00  | 28.00   |
| 0.05 | 2.704 | 0.1807397 | 0.0092360 | 0.90 | 1.40 | 27.538  | 16.618  | 11.00 | 16.00  | 24.00  | 35.00  | 49.00  | 2.898 | 30.244  | 18.408  | 12.00 | 17.00  | 26.00  | 38.00  | 54.00   |
| 0.05 | 2.704 | 0.1807397 | 0.0092360 | 0.80 | 1.40 | 19.823  | 10.266  | 9.00  | 12.00  | 18.00  | 25.00  | 33.00  | 2.898 | 21.292  | 11.159  | 10.00 | 13.00  | 19.00  | 26.00  | 35.00   |
| 0.05 | 2.704 | 0.1807397 | 0.0092360 | 0.70 | 1.40 | 12.884  | 5.639   | 7.00  | 9.00   | 12.00  | 16.00  | 20.00  | 2.898 | 13.607  | 5.921   | 7.00  | 9.00   | 13.00  | 17.00  | 21.00   |
| 0.05 | 2.704 | 0.1807397 | 0.0092360 | 0.60 | 1.40 | 8.619   | 3.387   | 5.00  | 6.00   | 8.00   | 10.00  | 13.00  | 2.898 | 9.011   | 3.496   | 5.00  | 6.00   | 8.00   | 11.00  | 14.00   |
| 0.05 | 2.704 | 0.1807397 | 0.0092360 | 0.50 | 1.40 | 5.940   | 2.122   | 4.00  | 4.00   | 6.00   | 7.00   | 9.00   | 2.898 | 6.248   | 2.182   | 4.00  | 5.00   | 6.00   | 7.00   | 9.00    |
| 0.05 | 2.704 | 0.1807397 | 0.0092360 | 1.10 | 0.90 | 120.198 | 99.638  | 32.00 | 51.00  | 91.00  | 158.00 | 247.00 | 2.898 | 147.708 | 125.578 | 36.00 | 60.00  | 111.00 | 194.00 | 312.00  |
| 0.05 | 2.704 | 0.1807397 | 0.0092360 | 1.20 | 0.90 | 47.944  | 29.884  | 20.00 | 27.00  | 40.00  | 60.00  | 85.00  | 2.898 | 53.629  | 33.171  | 21.00 | 30.00  | 45.00  | 68.00  | 97.00   |
| 0.05 | 2.704 | 0.1807397 | 0.0092360 | 1.30 | 0.90 | 27.931  | 13.033  | 14.00 | 19.00  | 25.00  | 34.00  | 45.00  | 2.898 | 30.243  | 14.733  | 16.00 | 20.00  | 27.00  | 37.00  | 49.00   |
| 0.05 | 2.704 | 0.1807397 |           |      |      |         |         |       |        |        |        |        |       |         |         |       |        |        |        |         |

|      |       |           |           |      |      |         |         |       |        |        |        |        |       |         |         |       |        |        |        |         |
|------|-------|-----------|-----------|------|------|---------|---------|-------|--------|--------|--------|--------|-------|---------|---------|-------|--------|--------|--------|---------|
| 0.05 | 2.704 | 0.1807397 | 0.0092360 | 0.60 | 0.90 | 8.720   | 3.561   | 5.00  | 6.00   | 8.00   | 11.00  | 13.00  | 2.898 | 9.168   | 3.716   | 5.00  | 6.00   | 9.00   | 11.00  | 14.00   |
| 0.05 | 2.704 | 0.1807397 | 0.0092360 | 0.50 | 0.90 | 5.982   | 2.154   | 4.00  | 4.00   | 6.00   | 7.00   | 9.00   | 2.898 | 6.249   | 2.211   | 4.00  | 5.00   | 6.00   | 7.00   | 9.00    |
| 0.05 | 2.704 | 0.1807397 | 0.0092360 | 1.10 | 0.80 | 75.497  | 53.004  | 26.00 | 38.00  | 60.00  | 97.00  | 145.00 | 2.898 | 86.888  | 64.877  | 29.00 | 42.00  | 68.00  | 112.00 | 169.00  |
| 0.05 | 2.704 | 0.1807397 | 0.0092360 | 1.20 | 0.80 | 42.586  | 24.184  | 19.00 | 26.00  | 37.00  | 53.00  | 74.00  | 2.898 | 47.669  | 27.636  | 21.00 | 28.00  | 41.00  | 60.00  | 84.00   |
| 0.05 | 2.704 | 0.1807397 | 0.0092360 | 1.30 | 0.80 | 27.032  | 12.233  | 14.00 | 18.00  | 25.00  | 33.00  | 43.00  | 2.898 | 29.314  | 13.481  | 15.00 | 20.00  | 26.00  | 36.00  | 47.00   |
| 0.05 | 2.704 | 0.1807397 | 0.0092360 | 1.40 | 0.80 | 19.919  | 7.427   | 12.00 | 15.00  | 19.00  | 24.00  | 30.00  | 2.898 | 21.225  | 8.102   | 13.00 | 15.00  | 20.00  | 25.00  | 32.00   |
| 0.05 | 2.704 | 0.1807397 | 0.0092360 | 0.90 | 0.80 | 58.074  | 40.280  | 20.00 | 30.00  | 47.00  | 75.00  | 110.00 | 2.898 | 65.563  | 46.725  | 22.00 | 32.00  | 52.00  | 86.00  | 126.00  |
| 0.05 | 2.704 | 0.1807397 | 0.0092360 | 0.80 | 0.80 | 25.428  | 14.241  | 11.00 | 15.00  | 22.00  | 32.00  | 44.00  | 2.898 | 27.835  | 15.933  | 12.00 | 16.00  | 24.00  | 35.00  | 49.00   |
| 0.05 | 2.704 | 0.1807397 | 0.0092360 | 0.70 | 0.80 | 13.973  | 6.477   | 7.00  | 9.00   | 13.00  | 17.00  | 22.00  | 2.898 | 14.703  | 6.936   | 7.00  | 10.00  | 13.00  | 18.00  | 24.00   |
| 0.05 | 2.704 | 0.1807397 | 0.0092360 | 0.60 | 0.80 | 8.722   | 3.564   | 5.00  | 6.00   | 8.00   | 11.00  | 13.00  | 2.898 | 9.178   | 3.647   | 5.00  | 7.00   | 9.00   | 11.00  | 14.00   |
| 0.05 | 2.704 | 0.1807397 | 0.0092360 | 0.50 | 0.80 | 5.988   | 2.155   | 4.00  | 4.00   | 6.00   | 7.00   | 9.00   | 2.898 | 6.265   | 2.245   | 4.00  | 5.00   | 6.00   | 8.00   | 9.00    |
| 0.05 | 2.704 | 0.1807397 | 0.0092360 | 1.10 | 0.70 | 42.470  | 23.125  | 20.00 | 26.00  | 37.00  | 53.00  | 73.00  | 2.898 | 47.043  | 26.643  | 21.00 | 29.00  | 40.00  | 58.00  | 82.00   |
| 0.05 | 2.704 | 0.1807397 | 0.0092360 | 1.20 | 0.70 | 33.253  | 15.734  | 17.00 | 22.00  | 30.00  | 40.00  | 54.00  | 2.898 | 36.723  | 17.877  | 19.00 | 24.00  | 33.00  | 45.00  | 60.00   |
| 0.05 | 2.704 | 0.1807397 | 0.0092360 | 1.30 | 0.70 | 24.893  | 10.021  | 14.00 | 18.00  | 23.00  | 30.00  | 38.00  | 2.898 | 26.935  | 11.007  | 15.00 | 19.00  | 25.00  | 32.00  | 41.00   |
| 0.05 | 2.704 | 0.1807397 | 0.0092360 | 1.40 | 0.70 | 19.247  | 6.799   | 12.00 | 14.00  | 18.00  | 23.00  | 28.00  | 2.898 | 20.682  | 7.483   | 13.00 | 15.00  | 19.00  | 24.00  | 31.00   |
| 0.05 | 2.704 | 0.1807397 | 0.0092360 | 0.90 | 0.70 | 37.310  | 20.199  | 17.00 | 23.00  | 33.00  | 47.00  | 64.00  | 2.898 | 41.642  | 22.820  | 19.00 | 26.00  | 36.00  | 52.00  | 72.00   |
| 0.05 | 2.704 | 0.1807397 | 0.0092360 | 0.80 | 0.70 | 23.193  | 11.625  | 11.00 | 15.00  | 21.00  | 29.00  | 39.00  | 2.898 | 25.316  | 12.778  | 12.00 | 16.00  | 23.00  | 32.00  | 42.00   |
| 0.05 | 2.704 | 0.1807397 | 0.0092360 | 0.70 | 0.70 | 13.781  | 6.302   | 7.00  | 9.00   | 13.00  | 17.00  | 22.00  | 2.898 | 14.622  | 6.620   | 7.00  | 10.00  | 13.00  | 18.00  | 23.00   |
| 0.05 | 2.704 | 0.1807397 | 0.0092360 | 0.60 | 0.70 | 8.724   | 3.564   | 5.00  | 6.00   | 8.00   | 11.00  | 13.00  | 2.898 | 9.149   | 3.656   | 5.00  | 7.00   | 9.00   | 11.00  | 14.00   |
| 0.05 | 2.704 | 0.1807397 | 0.0092360 | 0.50 | 0.70 | 5.993   | 2.175   | 4.00  | 4.00   | 6.00   | 7.00   | 9.00   | 2.898 | 6.247   | 2.211   | 4.00  | 5.00   | 6.00   | 7.00   | 9.00    |
| 0.05 | 2.704 | 0.1807397 | 0.0092360 | 1.10 | 0.60 | 26.194  | 10.325  | 15.00 | 19.00  | 24.00  | 31.00  | 40.00  | 2.898 | 28.549  | 11.204  | 17.00 | 20.00  | 26.00  | 34.00  | 43.00   |
| 0.05 | 2.704 | 0.1807397 | 0.0092360 | 1.20 | 0.60 | 24.326  | 9.018   | 15.00 | 18.00  | 23.00  | 29.00  | 36.00  | 2.898 | 26.463  | 9.758   | 16.00 | 19.00  | 25.00  | 32.00  | 40.00   |
| 0.05 | 2.704 | 0.1807397 | 0.0092360 | 1.30 | 0.60 | 21.182  | 7.125   | 13.00 | 16.00  | 20.00  | 25.00  | 31.00  | 2.898 | 22.932  | 7.840   | 14.00 | 17.00  | 22.00  | 27.00  | 33.00   |
| 0.05 | 2.704 | 0.1807397 | 0.0092360 | 1.40 | 0.60 | 17.897  | 5.393   | 12.00 | 14.00  | 17.00  | 21.00  | 25.00  | 2.898 | 19.157  | 5.937   | 12.00 | 15.00  | 18.00  | 22.00  | 27.00   |
| 0.05 | 2.704 | 0.1807397 | 0.0092360 | 0.90 | 0.60 | 25.144  | 10.058  | 15.00 | 18.00  | 23.00  | 30.00  | 38.00  | 2.898 | 27.318  | 10.997  | 16.00 | 19.00  | 25.00  | 33.00  | 42.00   |
| 0.05 | 2.704 | 0.1807397 | 0.0092360 | 0.80 | 0.60 | 19.760  | 7.942   | 11.00 | 14.00  | 19.00  | 24.00  | 30.00  | 2.898 | 21.188  | 8.465   | 11.00 | 15.00  | 20.00  | 26.00  | 32.00   |
| 0.05 | 2.704 | 0.1807397 | 0.0092360 | 0.70 | 0.60 | 13.244  | 5.506   | 7.00  | 9.00   | 12.00  | 16.00  | 21.00  | 2.898 | 14.041  | 5.891   | 7.00  | 10.00  | 13.00  | 17.00  | 22.00   |
| 0.05 | 2.704 | 0.1807397 | 0.0092360 | 0.60 | 0.60 | 8.708   | 3.461   | 5.00  | 6.00   | 8.00   | 11.00  | 13.00  | 2.898 | 9.138   | 3.625   | 5.00  | 6.00   | 9.00   | 11.00  | 14.00   |
| 0.05 | 2.704 | 0.1807397 | 0.0092360 | 0.50 | 0.60 | 6.011   | 2.167   | 4.00  | 4.00   | 6.00   | 7.00   | 9.00   | 2.898 | 6.260   | 2.190   | 4.00  | 5.00   | 6.00   | 7.00   | 9.00    |
| 0.05 | 2.704 | 0.1807397 | 0.0092360 | 1.10 | 0.50 | 18.263  | 5.190   | 12.00 | 15.00  | 17.00  | 21.00  | 25.00  | 2.898 | 19.657  | 5.626   | 13.00 | 16.00  | 19.00  | 23.00  | 27.00   |
| 0.05 | 2.704 | 0.1807397 | 0.0092360 | 1.20 | 0.50 | 17.917  | 4.827   | 12.00 | 14.00  | 17.00  | 21.00  | 24.00  | 2.898 | 19.255  | 5.306   | 13.00 | 15.00  | 18.00  | 22.00  | 26.00   |
| 0.05 | 2.704 | 0.1807397 | 0.0092360 | 1.30 | 0.50 | 17.076  | 4.528   | 12.00 | 14.00  | 16.00  | 20.00  | 23.00  | 2.898 | 18.260  | 4.838   | 13.00 | 15.00  | 18.00  | 21.00  | 25.00   |
| 0.05 | 2.704 | 0.1807397 | 0.0092360 | 1.40 | 0.50 | 15.689  | 3.910   | 11.00 | 13.00  | 15.00  | 18.00  | 21.00  | 2.898 | 16.756  | 4.239   | 12.00 | 14.00  | 16.00  | 19.00  | 22.00   |
| 0.05 | 2.704 | 0.1807397 | 0.0092360 | 0.90 | 0.50 | 17.944  | 5.163   | 12.00 | 14.00  | 17.00  | 21.00  | 25.00  | 2.898 | 19.191  | 5.434   | 13.00 | 15.00  | 18.00  | 22.00  | 26.00   |
| 0.05 | 2.704 | 0.1807397 | 0.0092360 | 0.80 | 0.50 | 16.058  | 4.927   | 10.00 | 13.00  | 16.00  | 19.00  | 22.00  | 2.898 | 17.210  | 5.244   | 11.00 | 14.00  | 17.00  | 20.00  | 24.00   |
| 0.05 | 2.704 | 0.1807397 | 0.0092360 | 0.70 | 0.50 | 12.409  | 4.385   | 7.00  | 9.00   | 12.00  | 15.00  | 18.00  | 2.898 | 12.944  | 4.610   | 7.00  | 10.00  | 13.00  | 16.00  | 19.00   |
| 0.05 | 2.704 | 0.1807397 | 0.0092360 | 0.60 | 0.50 | 8.580   | 3.264   | 5.00  | 6.00   | 8.00   | 11.00  | 13.00  | 2.898 | 9.033   | 3.415   | 5.00  | 7.00   | 9.00   | 11.00  | 14.00   |
| 0.05 | 2.704 | 0.1807397 | 0.0092360 | 0.50 | 0.50 | 6.026   | 2.182   | 4.00  | 4.00   | 6.00   | 7.00   | 9.00   | 2.898 | 6.240   | 2.195   | 4.00  | 5.00   | 6.00   | 7.00   | 9.00    |
| 0.10 | 2.992 | 0.2594297 | 0.0188990 | 1.00 | 1.00 | 370.380 | 364.296 | 47.00 | 115.00 | 259.00 | 502.25 | 829.10 | 3.165 | 500.219 | 494.183 | 61.00 | 154.00 | 346.00 | 682.25 | 1143.00 |
| 0.10 | 2.992 | 0.2594297 | 0.0188990 | 1.10 | 1.10 | 133.179 | 123.202 | 24.00 | 46.00  | 95.00  | 179.00 | 292.10 | 3.165 | 167.407 | 155.707 | 28.00 | 57.00  | 120.00 | 226.25 | 371.00  |
| 0.10 | 2.992 | 0.2594297 | 0.0188990 | 1.20 | 1.10 | 60.362  | 47.901  | 17.00 | 27.00  | 47.00  | 80.00  | 122.10 | 3.165 | 72.001  | 58.677  | 19.00 | 30.00  | 55.00  | 95.00  | 149.00  |
| 0.10 | 2.992 | 0.2594297 | 0.0188990 | 1.30 | 1.10 | 31.825  | 20.399  | 12.00 | 17.00  | 26.00  | 40.00  | 59.00  | 3.165 | 35.805  | 23.438  | 14.00 | 19.00  | 29.00  | 46.00  | 66.00   |
| 0.10 | 2.992 | 0.2594297 | 0.0188990 | 1.40 | 1.10 | 20.726  | 10.821  | 10.00 | 13.00  | 18.00  | 25.00  | 35.00  | 3.165 | 22.809  | 12.174  | 11.00 | 14.00  | 20.00  | 28.00  | 38.00   |
| 0.10 | 2.992 | 0.2594297 | 0.0188990 | 0.90 | 1.10 | 72.375  | 63.307  | 15.00 | 27.00  | 54.00  | 98.00  | 154.00 | 3.165 | 85.042  | 74.812  | 18.00 | 32.00  | 62.00  | 115.00 | 183.00  |
| 0.10 | 2.992 | 0.2594297 | 0.0188990 | 0.80 | 1.10 | 25.370  | 17.951  | 8.00  | 13.00  | 21.00  | 33.00  | 49.00  | 3.165 | 27.609  | 20.244  | 9.00  | 13.00  | 22.00  | 36.00  | 54.00   |
| 0.10 | 2.992 | 0.2594297 | 0.0188990 | 0.70 | 1.10 | 12.489  | 7.219   | 5.00  | 7.00   | 11.00  | 16.00  | 22.00  | 3.165 | 13.248  | 7.775   | 6.00  | 8.00   | 11.00  | 17.00  | 23.00   |
| 0.10 | 2.992 | 0.2594297 | 0.0188990 | 0.60 | 1.10 | 7.406   | 3.581   | 4.00  | 5.00   | 7.00   | 9.00   | 12.00  | 3.165 | 7.804   | 3.744   | 4.00  | 5.00   | 7.00   | 10.00  | 13.00   |
| 0.10 | 2.992 | 0.2594297 | 0.0188990 | 0.50 | 1.10 | 4.963   | 2.103   | 3.00  | 3.00   | 5.00   | 6.00   | 8.00   | 3.165 | 5.177   | 2.162   | 3.00  | 4.00   | 5.00   | 6.00   | 8.00    |
| 0.10 | 2.992 | 0.2594297 | 0.0188990 | 1.10 | 1.20 | 73.055  | 62.658  | 16.00 | 29.00  | 54.00  | 99.00  | 153.00 | 3.165 | 84.449  | 72.826  | 18.00 | 33.00  | 63.00  | 113.00 | 179.00  |
| 0.10 | 2.992 | 0.2594297 | 0.0188990 | 1.20 | 1.20 | 46.241  | 35.064  | 14.00 | 22.00  | 36.00  | 60.00  | 92.00  | 3.165 | 54.452  | 43.374  | 15.00 | 24.00  | 42.00  | 71.00  | 111.00  |
| 0.10 | 2.992 | 0.2594297 | 0.0188990 | 1.30 | 1.20 | 28.340  | 17.561  | 11.00 | 16.00  | 24.00  | 36.00  | 51.00  | 3.165 | 31.871  | 20.516  | 12.00 | 18.00  | 26.00  | 40.00  | 59.00   |
| 0.10 | 2.992 | 0.2594297 | 0.0188990 | 1.40 | 1.20 | 19.694  | 10.302  | 10.00 | 13.00  | 17.00  | 24.00  | 33.00  | 3.165 | 21.665  | 11.268  | 10.00 | 14.00  | 19.00  | 27.00  | 36.00   |
| 0.10 | 2.992 | 0.2594297 | 0.0188990 | 0.90 | 1.20 | 50.290  | 42.090  | 12.00 | 21.00  | 38.00  | 66.00  | 106.00 | 3.165 | 57.725  | 48.889  | 14.00 | 24.00  | 43.00  | 77.00  | 122.00  |
| 0.10 | 2.992 | 0.2594297 | 0.0188990 | 0.80 | 1.20 | 23.299  | 16.125  | 8.00  | 12.00  | 19.00  | 30.00  | 44.00  | 3.165 | 25.481  | 17.911  | 8.00  | 13.00  | 21.00  | 33.00  | 49.00   |
| 0.10 | 2.992 | 0.2594297 | 0.0188990 | 0.70 | 1.20 | 12.139  | 6.867   | 5.00  | 7.00   | 10.00  | 15.00  | 21.00  | 3.165 | 12.835  | 7.162   | 6.00  | 8.00   | 11.00  | 16.00  | 22.00   |
| 0.10 | 2.992 | 0.2594297 | 0.0188990 | 0.60 | 1.20 | 7.376   | 3.554   | 4.00  | 5.00   | 7.00   | 9.00   | 12.00  | 3.165 | 7.785   | 3.739   | 4.00  | 5.00   | 7.00   | 10.    |         |

|      |       |           |           |      |      |         |         |       |       |        |        |        |       |         |         |       |       |        |        |        |
|------|-------|-----------|-----------|------|------|---------|---------|-------|-------|--------|--------|--------|-------|---------|---------|-------|-------|--------|--------|--------|
| 0.10 | 2.992 | 0.2594297 | 0.0188990 | 0.80 | 1.30 | 20.594  | 13.303  | 8.00  | 11.00 | 17.00  | 26.00  | 38.00  | 3.165 | 22.346  | 14.767  | 8.00  | 12.00 | 19.00  | 29.00  | 42.00  |
| 0.10 | 2.992 | 0.2594297 | 0.0188990 | 0.70 | 1.30 | 11.763  | 6.480   | 5.00  | 7.00  | 10.00  | 15.00  | 20.00  | 3.165 | 12.458  | 6.839   | 5.00  | 8.00  | 11.00  | 16.00  | 21.10  |
| 0.10 | 2.992 | 0.2594297 | 0.0188990 | 0.60 | 1.30 | 7.402   | 3.509   | 4.00  | 5.00  | 7.00   | 9.00   | 12.00  | 3.165 | 7.682   | 3.593   | 4.00  | 5.00  | 7.00   | 10.00  | 12.00  |
| 0.10 | 2.992 | 0.2594297 | 0.0188990 | 0.50 | 1.30 | 4.940   | 2.052   | 3.00  | 3.00  | 5.00   | 6.00   | 8.00   | 3.165 | 5.186   | 2.166   | 3.00  | 4.00  | 5.00   | 6.00   | 8.00   |
| 0.10 | 2.992 | 0.2594297 | 0.0188990 | 1.10 | 1.40 | 29.272  | 21.613  | 9.00  | 14.00 | 23.00  | 38.00  | 58.00  | 3.165 | 32.504  | 24.129  | 10.00 | 15.00 | 26.00  | 42.00  | 64.00  |
| 0.10 | 2.992 | 0.2594297 | 0.0188990 | 1.20 | 1.40 | 25.598  | 17.305  | 9.00  | 13.00 | 21.00  | 33.00  | 49.00  | 3.165 | 28.967  | 20.489  | 10.00 | 15.00 | 23.00  | 37.00  | 55.00  |
| 0.10 | 2.992 | 0.2594297 | 0.0188990 | 1.30 | 1.40 | 20.855  | 12.226  | 9.00  | 12.00 | 18.00  | 26.00  | 37.00  | 3.165 | 22.792  | 13.722  | 9.00  | 13.00 | 19.00  | 29.00  | 41.00  |
| 0.10 | 2.992 | 0.2594297 | 0.0188990 | 1.40 | 1.40 | 16.691  | 8.265   | 8.00  | 11.00 | 15.00  | 21.00  | 28.00  | 3.165 | 18.169  | 9.170   | 9.00  | 12.00 | 16.00  | 22.00  | 30.00  |
| 0.10 | 2.992 | 0.2594297 | 0.0188990 | 0.90 | 1.40 | 26.644  | 19.750  | 8.00  | 13.00 | 21.00  | 34.00  | 52.00  | 3.165 | 29.173  | 21.405  | 9.00  | 14.00 | 23.00  | 38.00  | 57.00  |
| 0.10 | 2.992 | 0.2594297 | 0.0188990 | 0.80 | 1.40 | 18.184  | 11.680  | 7.00  | 10.00 | 15.00  | 23.00  | 33.00  | 3.165 | 19.702  | 12.711  | 7.00  | 11.00 | 16.00  | 25.00  | 36.00  |
| 0.10 | 2.992 | 0.2594297 | 0.0188990 | 0.70 | 1.40 | 11.206  | 5.965   | 5.00  | 7.00  | 10.00  | 14.00  | 19.00  | 3.165 | 11.934  | 6.366   | 5.00  | 7.00  | 11.00  | 15.00  | 20.00  |
| 0.10 | 2.992 | 0.2594297 | 0.0188990 | 0.60 | 1.40 | 7.239   | 3.325   | 4.00  | 5.00  | 7.00   | 9.00   | 12.00  | 3.165 | 7.596   | 3.607   | 4.00  | 5.00  | 7.00   | 9.00   | 12.00  |
| 0.10 | 2.992 | 0.2594297 | 0.0188990 | 0.50 | 1.40 | 4.933   | 2.050   | 3.00  | 3.00  | 5.00   | 6.00   | 8.00   | 3.165 | 5.085   | 2.056   | 3.00  | 4.00  | 5.00   | 6.00   | 8.00   |
| 0.10 | 2.992 | 0.2594297 | 0.0188990 | 1.10 | 0.90 | 210.734 | 198.828 | 34.00 | 70.00 | 152.00 | 286.00 | 460.00 | 3.165 | 285.330 | 269.429 | 43.00 | 94.00 | 206.00 | 389.00 | 627.00 |
| 0.10 | 2.992 | 0.2594297 | 0.0188990 | 1.20 | 0.90 | 68.617  | 55.152  | 19.00 | 30.00 | 52.00  | 91.00  | 141.00 | 3.165 | 83.308  | 68.497  | 21.00 | 35.00 | 63.00  | 111.00 | 173.00 |
| 0.10 | 2.992 | 0.2594297 | 0.0188990 | 1.30 | 0.90 | 33.513  | 22.026  | 13.00 | 18.00 | 27.00  | 42.00  | 62.00  | 3.165 | 37.603  | 25.162  | 14.00 | 20.00 | 31.00  | 48.00  | 70.00  |
| 0.10 | 2.992 | 0.2594297 | 0.0188990 | 1.40 | 0.90 | 21.238  | 11.302  | 10.00 | 13.00 | 18.00  | 26.00  | 36.00  | 3.165 | 23.364  | 12.540  | 11.00 | 14.00 | 20.00  | 29.00  | 40.00  |
| 0.10 | 2.992 | 0.2594297 | 0.0188990 | 0.90 | 0.90 | 88.738  | 77.822  | 17.00 | 33.00 | 65.00  | 120.00 | 193.00 | 3.165 | 104.250 | 94.451  | 20.00 | 38.00 | 76.00  | 139.00 | 226.00 |
| 0.10 | 2.992 | 0.2594297 | 0.0188990 | 0.80 | 0.90 | 26.608  | 19.165  | 8.00  | 13.00 | 22.00  | 34.00  | 52.00  | 3.165 | 28.808  | 20.791  | 9.00  | 14.00 | 23.00  | 38.00  | 56.00  |
| 0.10 | 2.992 | 0.2594297 | 0.0188990 | 0.70 | 0.90 | 12.535  | 7.214   | 5.00  | 7.00  | 11.00  | 16.00  | 22.00  | 3.165 | 13.206  | 7.645   | 6.00  | 8.00  | 11.00  | 17.00  | 23.00  |
| 0.10 | 2.992 | 0.2594297 | 0.0188990 | 0.60 | 0.90 | 7.444   | 3.580   | 4.00  | 5.00  | 7.00   | 9.00   | 12.00  | 3.165 | 7.784   | 3.734   | 4.00  | 5.00  | 7.00   | 10.00  | 13.00  |
| 0.10 | 2.992 | 0.2594297 | 0.0188990 | 0.50 | 0.90 | 4.992   | 2.137   | 3.00  | 3.00  | 5.00   | 6.00   | 8.00   | 3.165 | 5.198   | 2.231   | 3.00  | 4.00  | 5.00   | 6.00   | 8.00   |
| 0.10 | 2.992 | 0.2594297 | 0.0188990 | 1.10 | 0.80 | 132.157 | 116.752 | 28.00 | 49.00 | 97.00  | 178.00 | 282.10 | 3.165 | 171.763 | 154.640 | 33.00 | 62.00 | 124.00 | 233.00 | 374.00 |
| 0.10 | 2.992 | 0.2594297 | 0.0188990 | 1.20 | 0.80 | 60.865  | 46.951  | 18.00 | 28.00 | 47.00  | 79.00  | 122.00 | 3.165 | 72.360  | 57.709  | 20.00 | 32.00 | 56.00  | 94.00  | 147.00 |
| 0.10 | 2.992 | 0.2594297 | 0.0188990 | 1.30 | 0.80 | 32.079  | 20.047  | 13.00 | 18.00 | 27.00  | 40.00  | 58.00  | 3.165 | 36.565  | 23.696  | 14.00 | 20.00 | 30.00  | 46.25  | 68.00  |
| 0.10 | 2.992 | 0.2594297 | 0.0188990 | 1.40 | 0.80 | 20.944  | 10.930  | 10.00 | 13.00 | 18.00  | 26.00  | 35.00  | 3.165 | 23.029  | 12.297  | 11.00 | 14.00 | 20.00  | 28.00  | 39.00  |
| 0.10 | 2.992 | 0.2594297 | 0.0188990 | 0.90 | 0.80 | 72.715  | 61.055  | 17.00 | 29.00 | 54.50  | 98.00  | 153.00 | 3.165 | 87.433  | 76.129  | 18.00 | 34.00 | 65.00  | 118.00 | 185.00 |
| 0.10 | 2.992 | 0.2594297 | 0.0188990 | 0.80 | 0.80 | 25.740  | 18.003  | 8.00  | 13.00 | 21.00  | 33.00  | 49.00  | 3.165 | 27.941  | 19.913  | 9.00  | 14.00 | 23.00  | 36.00  | 54.00  |
| 0.10 | 2.992 | 0.2594297 | 0.0188990 | 0.70 | 0.80 | 12.585  | 7.258   | 5.00  | 7.00  | 11.00  | 16.00  | 22.00  | 3.165 | 13.353  | 7.769   | 6.00  | 8.00  | 12.00  | 17.00  | 23.00  |
| 0.10 | 2.992 | 0.2594297 | 0.0188990 | 0.60 | 0.80 | 7.464   | 3.700   | 4.00  | 5.00  | 7.00   | 9.00   | 12.00  | 3.165 | 7.831   | 3.772   | 4.00  | 5.00  | 7.00   | 10.00  | 13.00  |
| 0.10 | 2.992 | 0.2594297 | 0.0188990 | 0.50 | 0.80 | 5.009   | 2.134   | 3.00  | 3.00  | 5.00   | 6.00   | 8.00   | 3.165 | 5.199   | 2.176   | 3.00  | 4.00  | 5.00   | 6.00   | 8.00   |
| 0.10 | 2.992 | 0.2594297 | 0.0188990 | 1.10 | 0.70 | 65.357  | 50.936  | 20.00 | 30.00 | 50.00  | 85.00  | 131.00 | 3.165 | 80.714  | 65.353  | 22.00 | 35.00 | 61.00  | 106.00 | 166.00 |
| 0.10 | 2.992 | 0.2594297 | 0.0188990 | 1.20 | 0.70 | 45.015  | 31.404  | 16.00 | 23.00 | 36.00  | 57.00  | 86.00  | 3.165 | 53.342  | 38.548  | 18.00 | 26.00 | 42.00  | 69.00  | 103.00 |
| 0.10 | 2.992 | 0.2594297 | 0.0188990 | 1.30 | 0.70 | 29.163  | 17.272  | 13.00 | 17.00 | 25.00  | 37.00  | 52.00  | 3.165 | 32.463  | 19.847  | 14.00 | 19.00 | 27.00  | 41.00  | 58.00  |
| 0.10 | 2.992 | 0.2594297 | 0.0188990 | 1.40 | 0.70 | 20.185  | 9.960   | 10.00 | 13.00 | 18.00  | 25.00  | 33.00  | 3.165 | 22.170  | 11.262  | 11.00 | 14.00 | 19.00  | 27.00  | 37.00  |
| 0.10 | 2.992 | 0.2594297 | 0.0188990 | 0.90 | 0.70 | 48.956  | 37.371  | 15.00 | 23.00 | 38.00  | 64.00  | 97.00  | 3.165 | 57.326  | 44.309  | 17.00 | 26.00 | 44.00  | 75.00  | 115.10 |
| 0.10 | 2.992 | 0.2594297 | 0.0188990 | 0.80 | 0.70 | 23.868  | 15.740  | 9.00  | 13.00 | 20.00  | 31.00  | 44.00  | 3.165 | 26.010  | 17.233  | 9.00  | 14.00 | 22.00  | 34.00  | 48.00  |
| 0.10 | 2.992 | 0.2594297 | 0.0188990 | 0.70 | 0.70 | 12.274  | 6.926   | 5.00  | 7.00  | 11.00  | 16.00  | 21.00  | 3.165 | 13.247  | 7.436   | 6.00  | 8.00  | 12.00  | 17.00  | 23.00  |
| 0.10 | 2.992 | 0.2594297 | 0.0188990 | 0.60 | 0.70 | 7.522   | 3.650   | 4.00  | 5.00  | 7.00   | 9.00   | 12.00  | 3.165 | 7.754   | 3.713   | 4.00  | 5.00  | 7.00   | 10.00  | 13.00  |
| 0.10 | 2.992 | 0.2594297 | 0.0188990 | 0.50 | 0.70 | 4.955   | 2.076   | 3.00  | 3.00  | 5.00   | 6.00   | 8.00   | 3.165 | 5.198   | 2.168   | 3.00  | 4.00  | 5.00   | 6.00   | 8.00   |
| 0.10 | 2.992 | 0.2594297 | 0.0188990 | 1.10 | 0.60 | 33.209  | 19.965  | 14.00 | 19.00 | 28.00  | 42.00  | 59.00  | 3.165 | 38.355  | 23.992  | 16.00 | 22.00 | 32.00  | 48.00  | 70.00  |
| 0.10 | 2.992 | 0.2594297 | 0.0188990 | 1.20 | 0.60 | 29.442  | 16.300  | 14.00 | 18.00 | 25.00  | 36.00  | 51.00  | 3.165 | 33.249  | 19.388  | 15.00 | 20.00 | 28.00  | 41.00  | 59.00  |
| 0.10 | 2.992 | 0.2594297 | 0.0188990 | 1.30 | 0.60 | 23.380  | 11.661  | 12.00 | 15.00 | 21.00  | 29.00  | 38.00  | 3.165 | 26.184  | 13.470  | 13.00 | 17.00 | 23.00  | 32.00  | 44.00  |
| 0.10 | 2.992 | 0.2594297 | 0.0188990 | 1.40 | 0.60 | 18.404  | 8.310   | 10.00 | 13.00 | 17.00  | 22.00  | 29.00  | 3.165 | 20.158  | 9.151   | 11.00 | 14.00 | 18.00  | 25.00  | 32.00  |
| 0.10 | 2.992 | 0.2594297 | 0.0188990 | 0.90 | 0.60 | 29.414  | 17.323  | 13.00 | 17.00 | 25.00  | 37.00  | 52.00  | 3.165 | 33.519  | 20.763  | 14.00 | 19.00 | 28.00  | 42.00  | 61.00  |
| 0.10 | 2.992 | 0.2594297 | 0.0188990 | 0.80 | 0.60 | 19.989  | 11.339  | 8.00  | 12.00 | 18.00  | 25.00  | 35.00  | 3.165 | 21.976  | 12.765  | 9.00  | 13.00 | 19.00  | 27.00  | 38.00  |
| 0.10 | 2.992 | 0.2594297 | 0.0188990 | 0.70 | 0.60 | 11.967  | 6.232   | 5.00  | 7.00  | 11.00  | 15.00  | 20.00  | 3.165 | 12.685  | 6.753   | 6.00  | 8.00  | 11.00  | 16.00  | 22.00  |
| 0.10 | 2.992 | 0.2594297 | 0.0188990 | 0.60 | 0.60 | 7.489   | 3.565   | 4.00  | 5.00  | 7.00   | 9.00   | 12.00  | 3.165 | 7.751   | 3.617   | 4.00  | 5.00  | 7.00   | 10.00  | 13.00  |
| 0.10 | 2.992 | 0.2594297 | 0.0188990 | 0.50 | 0.60 | 5.019   | 2.113   | 3.00  | 3.00  | 5.00   | 6.00   | 8.00   | 3.165 | 5.211   | 2.201   | 3.00  | 4.00  | 5.00   | 6.00   | 8.00   |
| 0.10 | 2.992 | 0.2594297 | 0.0188990 | 1.10 | 0.50 | 19.842  | 8.364   | 11.00 | 14.00 | 18.00  | 24.00  | 31.00  | 3.165 | 21.788  | 9.628   | 12.00 | 15.00 | 20.00  | 26.00  | 34.00  |
| 0.10 | 2.992 | 0.2594297 | 0.0188990 | 1.20 | 0.50 | 19.190  | 7.777   | 11.00 | 14.00 | 17.00  | 23.00  | 29.00  | 3.165 | 21.102  | 8.841   | 12.00 | 15.00 | 19.00  | 25.00  | 32.00  |
| 0.10 | 2.992 | 0.2594297 | 0.0188990 | 1.30 | 0.50 | 17.448  | 6.651   | 10.00 | 13.00 | 16.00  | 21.00  | 26.00  | 3.165 | 19.178  | 7.543   | 11.00 | 14.00 | 18.00  | 23.00  | 29.00  |
| 0.10 | 2.992 | 0.2594297 | 0.0188990 | 1.40 | 0.50 | 15.518  | 5.511   | 10.00 | 12.00 | 15.00  | 18.00  | 23.00  | 3.165 | 16.934  | 6.342   | 10.00 | 12.00 | 16.00  | 20.00  | 25.00  |
| 0.10 | 2.992 | 0.2594297 | 0.0188990 | 0.90 | 0.50 | 19.002  | 8.136   | 11.00 | 13.00 | 17.00  | 23.00  | 29.00  | 3.165 | 20.868  | 9.241   | 11.00 | 15.00 | 19.00  | 25.00  | 33.00  |
| 0.10 | 2.992 | 0.2594297 | 0.0188990 | 0.80 | 0.50 | 15.733  | 6.844   | 8.00  | 11.00 | 15.00  | 19.00  | 25.00  | 3.165 | 17.105  | 7.662   | 9.00  | 12.00 | 16.00  | 21.00  | 27.00  |
| 0.10 | 2.992 | 0.2594297 | 0.0188990 | 0.70 | 0.50 | 11.094  | 5.068   | 5.00  | 7.00  | 10.00  | 14.00  | 18.00  | 3.165 | 11.887  | 5.486   | 6.00  | 8.00  | 11.00  | 15.00  | 19.00  |

|      |       |           |           |      |      |         |         |       |        |        |        |        |       |         |         |       |        |        |        |         |
|------|-------|-----------|-----------|------|------|---------|---------|-------|--------|--------|--------|--------|-------|---------|---------|-------|--------|--------|--------|---------|
| 0.15 | 3.138 | 0.3220597 | 0.0288483 | 1.40 | 1.10 | 24.910  | 16.766  | 9.00  | 13.00  | 20.00  | 32.00  | 46.00  | 3.299 | 28.243  | 19.543  | 10.00 | 15.00  | 23.00  | 36.00  | 53.00   |
| 0.15 | 3.138 | 0.3220597 | 0.0288483 | 0.90 | 1.10 | 74.575  | 68.095  | 13.00 | 26.00  | 54.00  | 101.00 | 165.00 | 3.299 | 87.688  | 80.400  | 15.00 | 30.00  | 62.00  | 120.00 | 195.00  |
| 0.15 | 3.138 | 0.3220597 | 0.0288483 | 0.80 | 1.10 | 26.330  | 20.788  | 7.00  | 12.00  | 20.00  | 35.00  | 53.00  | 3.299 | 28.929  | 23.099  | 8.00  | 13.00  | 22.00  | 38.00  | 59.00   |
| 0.15 | 3.138 | 0.3220597 | 0.0288483 | 0.70 | 1.10 | 12.092  | 8.022   | 4.00  | 6.00   | 10.00  | 15.00  | 22.00  | 3.299 | 12.866  | 8.490   | 5.00  | 7.00   | 11.00  | 16.00  | 24.00   |
| 0.15 | 3.138 | 0.3220597 | 0.0288483 | 0.60 | 1.10 | 6.897   | 3.762   | 3.00  | 4.00   | 6.00   | 9.00   | 12.00  | 3.299 | 7.256   | 3.863   | 3.00  | 4.00   | 6.00   | 9.00   | 12.00   |
| 0.15 | 3.138 | 0.3220597 | 0.0288483 | 0.50 | 1.10 | 4.536   | 2.119   | 2.00  | 3.00   | 4.00   | 6.00   | 7.00   | 3.299 | 4.724   | 2.219   | 2.00  | 3.00   | 4.00   | 6.00   | 8.00    |
| 0.15 | 3.138 | 0.3220597 | 0.0288483 | 1.10 | 1.20 | 82.862  | 74.831  | 15.00 | 29.00  | 61.00  | 113.00 | 180.00 | 3.299 | 100.952 | 93.739  | 17.00 | 34.00  | 72.00  | 138.00 | 225.10  |
| 0.15 | 3.138 | 0.3220597 | 0.0288483 | 1.20 | 1.20 | 58.006  | 48.956  | 13.00 | 23.00  | 43.00  | 78.00  | 122.00 | 3.299 | 69.447  | 60.996  | 15.00 | 26.00  | 51.00  | 92.00  | 149.00  |
| 0.15 | 3.138 | 0.3220597 | 0.0288483 | 1.30 | 1.20 | 35.691  | 27.191  | 11.00 | 17.00  | 28.00  | 46.00  | 72.00  | 3.299 | 41.915  | 32.484  | 12.00 | 19.00  | 33.00  | 55.00  | 84.00   |
| 0.15 | 3.138 | 0.3220597 | 0.0288483 | 1.40 | 1.20 | 22.907  | 14.871  | 9.00  | 12.00  | 19.00  | 29.00  | 42.00  | 3.299 | 26.481  | 17.705  | 10.00 | 14.00  | 21.00  | 34.00  | 50.00   |
| 0.15 | 3.138 | 0.3220597 | 0.0288483 | 0.90 | 1.20 | 52.672  | 45.970  | 11.00 | 20.00  | 39.00  | 70.25  | 113.00 | 3.299 | 61.564  | 53.630  | 12.90 | 23.00  | 46.00  | 83.00  | 132.00  |
| 0.15 | 3.138 | 0.3220597 | 0.0288483 | 0.80 | 1.20 | 23.515  | 17.825  | 7.00  | 11.00  | 18.00  | 31.00  | 47.00  | 3.299 | 25.930  | 20.290  | 7.00  | 12.00  | 20.00  | 34.00  | 52.00   |
| 0.15 | 3.138 | 0.3220597 | 0.0288483 | 0.70 | 1.20 | 11.735  | 7.695   | 4.00  | 6.00   | 10.00  | 15.00  | 22.00  | 3.299 | 12.407  | 7.911   | 5.00  | 7.00   | 10.00  | 16.00  | 23.00   |
| 0.15 | 3.138 | 0.3220597 | 0.0288483 | 0.60 | 1.20 | 6.909   | 3.691   | 3.00  | 4.00   | 6.00   | 9.00   | 12.00  | 3.299 | 7.199   | 3.853   | 3.00  | 4.00   | 6.00   | 9.00   | 12.00   |
| 0.15 | 3.138 | 0.3220597 | 0.0288483 | 0.50 | 1.20 | 4.523   | 2.085   | 2.00  | 3.00   | 4.00   | 6.00   | 7.00   | 3.299 | 4.702   | 2.202   | 2.00  | 3.00   | 4.00   | 6.00   | 8.00    |
| 0.15 | 3.138 | 0.3220597 | 0.0288483 | 1.10 | 1.30 | 47.306  | 40.576  | 10.00 | 18.00  | 35.00  | 63.00  | 101.00 | 3.299 | 54.393  | 47.406  | 11.00 | 21.00  | 40.50  | 72.00  | 117.00  |
| 0.15 | 3.138 | 0.3220597 | 0.0288483 | 1.20 | 1.30 | 39.129  | 32.063  | 10.00 | 16.00  | 29.00  | 53.00  | 82.00  | 3.299 | 44.950  | 37.564  | 11.00 | 19.00  | 34.00  | 59.00  | 94.00   |
| 0.15 | 3.138 | 0.3220597 | 0.0288483 | 1.30 | 1.30 | 28.475  | 20.605  | 9.00  | 14.00  | 23.00  | 37.00  | 56.00  | 3.299 | 32.819  | 24.813  | 10.00 | 15.75  | 26.00  | 43.00  | 65.00   |
| 0.15 | 3.138 | 0.3220597 | 0.0288483 | 1.40 | 1.30 | 20.564  | 13.033  | 8.00  | 11.00  | 17.00  | 26.00  | 38.00  | 3.299 | 22.982  | 15.025  | 9.00  | 12.00  | 19.00  | 29.00  | 42.00   |
| 0.15 | 3.138 | 0.3220597 | 0.0288483 | 0.90 | 1.30 | 36.371  | 30.397  | 9.00  | 15.00  | 27.00  | 49.00  | 75.00  | 3.299 | 41.815  | 35.557  | 10.00 | 17.00  | 31.00  | 55.00  | 88.00   |
| 0.15 | 3.138 | 0.3220597 | 0.0288483 | 0.80 | 1.30 | 20.786  | 15.283  | 7.00  | 10.00  | 17.00  | 27.00  | 41.00  | 3.299 | 22.539  | 16.748  | 7.00  | 11.00  | 18.00  | 29.00  | 44.00   |
| 0.15 | 3.138 | 0.3220597 | 0.0288483 | 0.70 | 1.30 | 11.251  | 6.987   | 4.00  | 6.00   | 9.00   | 14.00  | 20.00  | 3.299 | 11.982  | 7.484   | 5.00  | 7.00   | 10.00  | 15.00  | 22.00   |
| 0.15 | 3.138 | 0.3220597 | 0.0288483 | 0.60 | 1.30 | 6.795   | 3.553   | 3.00  | 4.00   | 6.00   | 9.00   | 11.00  | 3.299 | 7.116   | 3.777   | 3.00  | 4.00   | 6.00   | 9.00   | 12.00   |
| 0.15 | 3.138 | 0.3220597 | 0.0288483 | 0.50 | 1.30 | 4.561   | 2.102   | 2.00  | 3.00   | 4.00   | 6.00   | 7.00   | 3.299 | 4.701   | 2.177   | 2.00  | 3.00   | 4.00   | 6.00   | 8.00    |
| 0.15 | 3.138 | 0.3220597 | 0.0288483 | 1.10 | 1.40 | 30.900  | 25.211  | 8.00  | 13.00  | 24.00  | 41.00  | 64.00  | 3.299 | 34.989  | 28.616  | 9.00  | 15.00  | 27.00  | 46.00  | 72.00   |
| 0.15 | 3.138 | 0.3220597 | 0.0288483 | 1.20 | 1.40 | 28.335  | 22.093  | 8.00  | 13.00  | 22.00  | 37.00  | 58.00  | 3.299 | 31.507  | 24.775  | 9.00  | 14.00  | 24.00  | 42.00  | 64.00   |
| 0.15 | 3.138 | 0.3220597 | 0.0288483 | 1.30 | 1.40 | 22.982  | 16.171  | 8.00  | 12.00  | 19.00  | 30.00  | 44.00  | 3.299 | 25.761  | 18.705  | 8.00  | 13.00  | 21.00  | 33.00  | 50.00   |
| 0.15 | 3.138 | 0.3220597 | 0.0288483 | 1.40 | 1.40 | 17.885  | 11.072  | 7.00  | 10.00  | 15.00  | 22.00  | 32.00  | 3.299 | 19.971  | 12.497  | 8.00  | 11.00  | 17.00  | 25.00  | 36.00   |
| 0.15 | 3.138 | 0.3220597 | 0.0288483 | 0.90 | 1.40 | 26.663  | 20.842  | 7.00  | 12.00  | 21.00  | 35.00  | 54.00  | 3.299 | 29.904  | 23.802  | 8.00  | 13.00  | 23.00  | 39.00  | 61.00   |
| 0.15 | 3.138 | 0.3220597 | 0.0288483 | 0.80 | 1.40 | 17.771  | 12.541  | 6.00  | 9.00   | 15.00  | 23.00  | 34.00  | 3.299 | 19.434  | 13.975  | 6.00  | 10.00  | 16.00  | 25.00  | 38.00   |
| 0.15 | 3.138 | 0.3220597 | 0.0288483 | 0.70 | 1.40 | 10.645  | 6.390   | 4.00  | 6.00   | 9.00   | 13.00  | 19.00  | 3.299 | 11.242  | 6.961   | 4.00  | 6.00   | 10.00  | 14.00  | 20.00   |
| 0.15 | 3.138 | 0.3220597 | 0.0288483 | 0.60 | 1.40 | 6.678   | 3.465   | 3.00  | 4.00   | 6.00   | 8.00   | 11.00  | 3.299 | 7.000   | 3.639   | 3.00  | 4.00   | 6.00   | 9.00   | 12.00   |
| 0.15 | 3.138 | 0.3220597 | 0.0288483 | 0.50 | 1.40 | 4.487   | 2.082   | 2.00  | 3.00   | 4.00   | 5.00   | 7.00   | 3.299 | 4.659   | 2.133   | 2.00  | 3.00   | 4.00   | 6.00   | 7.00    |
| 0.15 | 3.138 | 0.3220597 | 0.0288483 | 1.10 | 0.90 | 369.304 | 358.562 | 48.00 | 112.00 | 257.00 | 509.00 | 843.00 | 3.299 | 536.546 | 525.427 | 69.00 | 162.00 | 373.00 | 740.25 | 1229.00 |
| 0.15 | 3.138 | 0.3220597 | 0.0288483 | 1.20 | 0.90 | 112.862 | 102.841 | 21.00 | 40.00  | 81.00  | 152.00 | 246.00 | 3.299 | 148.598 | 140.237 | 25.00 | 51.00  | 106.00 | 200.00 | 327.00  |
| 0.15 | 3.138 | 0.3220597 | 0.0288483 | 1.30 | 0.90 | 46.613  | 37.659  | 13.00 | 20.00  | 35.00  | 61.00  | 96.00  | 3.299 | 55.815  | 45.516  | 15.00 | 24.00  | 42.00  | 73.00  | 115.00  |
| 0.15 | 3.138 | 0.3220597 | 0.0288483 | 1.40 | 0.90 | 26.248  | 17.497  | 10.00 | 14.00  | 21.00  | 33.00  | 48.00  | 3.299 | 30.058  | 20.789  | 11.00 | 15.00  | 24.00  | 39.00  | 57.00   |
| 0.15 | 3.138 | 0.3220597 | 0.0288483 | 0.90 | 0.90 | 98.779  | 93.901  | 16.00 | 33.00  | 70.00  | 133.00 | 223.00 | 3.299 | 114.580 | 107.402 | 18.00 | 38.00  | 82.00  | 156.00 | 254.00  |
| 0.15 | 3.138 | 0.3220597 | 0.0288483 | 0.80 | 0.90 | 27.104  | 21.722  | 7.00  | 12.00  | 21.00  | 36.00  | 55.00  | 3.299 | 30.438  | 24.566  | 8.00  | 13.00  | 23.00  | 40.00  | 63.00   |
| 0.15 | 3.138 | 0.3220597 | 0.0288483 | 0.70 | 0.90 | 12.205  | 8.036   | 5.00  | 7.00   | 10.00  | 16.00  | 23.00  | 3.299 | 12.946  | 8.532   | 5.00  | 7.00   | 11.00  | 17.00  | 24.00   |
| 0.15 | 3.138 | 0.3220597 | 0.0288483 | 0.60 | 0.90 | 6.990   | 3.818   | 3.00  | 4.00   | 6.00   | 9.00   | 12.00  | 3.299 | 7.219   | 3.926   | 3.00  | 4.00   | 6.00   | 9.00   | 12.00   |
| 0.15 | 3.138 | 0.3220597 | 0.0288483 | 0.50 | 0.90 | 4.555   | 2.135   | 2.00  | 3.00   | 4.00   | 6.00   | 7.00   | 3.299 | 4.715   | 2.182   | 2.00  | 3.00   | 4.00   | 6.00   | 8.00    |
| 0.15 | 3.138 | 0.3220597 | 0.0288483 | 1.10 | 0.80 | 253.801 | 244.058 | 37.00 | 83.00  | 177.00 | 346.00 | 570.00 | 3.299 | 362.120 | 354.071 | 49.00 | 113.00 | 252.00 | 496.25 | 812.00  |
| 0.15 | 3.138 | 0.3220597 | 0.0288483 | 1.20 | 0.80 | 100.862 | 89.051  | 20.00 | 37.00  | 73.00  | 137.00 | 218.00 | 3.299 | 132.450 | 122.643 | 24.00 | 47.00  | 94.00  | 177.00 | 290.00  |
| 0.15 | 3.138 | 0.3220597 | 0.0288483 | 1.30 | 0.80 | 45.201  | 34.863  | 13.00 | 21.00  | 35.00  | 60.00  | 92.00  | 3.299 | 54.213  | 43.895  | 15.00 | 23.75  | 41.00  | 70.00  | 112.00  |
| 0.15 | 3.138 | 0.3220597 | 0.0288483 | 1.40 | 0.80 | 25.854  | 16.806  | 10.00 | 14.00  | 21.00  | 33.00  | 48.00  | 3.299 | 29.593  | 20.108  | 11.00 | 16.00  | 24.00  | 38.00  | 56.00   |
| 0.15 | 3.138 | 0.3220597 | 0.0288483 | 0.90 | 0.80 | 87.023  | 79.999  | 15.00 | 30.00  | 62.00  | 119.00 | 191.00 | 3.299 | 104.522 | 97.470  | 17.00 | 34.00  | 74.00  | 145.00 | 233.10  |
| 0.15 | 3.138 | 0.3220597 | 0.0288483 | 0.80 | 0.80 | 27.360  | 21.825  | 7.00  | 12.00  | 21.00  | 36.00  | 56.10  | 3.299 | 30.071  | 24.112  | 8.00  | 13.00  | 23.00  | 39.00  | 62.00   |
| 0.15 | 3.138 | 0.3220597 | 0.0288483 | 0.70 | 0.80 | 12.227  | 7.982   | 4.00  | 7.00   | 10.00  | 16.00  | 23.00  | 3.299 | 12.934  | 8.430   | 5.00  | 7.00   | 11.00  | 16.00  | 24.00   |
| 0.15 | 3.138 | 0.3220597 | 0.0288483 | 0.60 | 0.80 | 6.996   | 3.867   | 3.00  | 4.00   | 6.00   | 9.00   | 12.00  | 3.299 | 7.253   | 3.954   | 3.00  | 4.00   | 6.00   | 9.00   | 12.00   |
| 0.15 | 3.138 | 0.3220597 | 0.0288483 | 0.50 | 0.80 | 4.533   | 2.128   | 2.00  | 3.00   | 4.00   | 6.00   | 7.00   | 3.299 | 4.702   | 2.190   | 2.00  | 3.00   | 4.00   | 6.00   | 8.00    |
| 0.15 | 3.138 | 0.3220597 | 0.0288483 | 1.10 | 0.70 | 130.030 | 118.251 | 25.00 | 47.00  | 95.00  | 175.00 | 281.00 | 3.299 | 177.516 | 164.090 | 29.00 | 60.00  | 129.00 | 244.00 | 392.00  |
| 0.15 | 3.138 | 0.3220597 | 0.0288483 | 1.20 | 0.70 | 76.030  | 64.513  | 18.00 | 30.00  | 57.00  | 101.25 | 160.00 | 3.299 | 97.508  | 84.503  | 21.00 | 37.00  | 72.00  | 132.00 | 208.10  |
| 0.15 | 3.138 | 0.3220597 | 0.0288483 | 1.30 | 0.70 | 40.288  | 29.784  | 13.00 | 19.00  | 32.00  | 52.00  | 79.00  | 3.299 | 48.994  | 38.252  | 14.00 | 22.00  | 38.00  | 63.00  | 100.00  |
| 0.15 | 3.138 | 0.3220597 | 0.0288483 | 1.40 | 0.70 | 24.999  | 16.009  | 10.00 | 14.00  | 21.00  | 31.00  | 46.00  | 3.299 | 28.411  | 18.561  | 11.00 | 15.00  | 23.00  | 36.00  | 53.00   |
| 0.15 | 3.138 | 0.3220597 | 0.0288483 | 0.90 | 0.70 | 68.381  | 59.162  | 14.00 | 26.00  | 51.00  | 92.00  | 146.00 | 3.299 | 83.304  | 74.     |       |        |        |        |         |

|      |       |           |           |      |      |        |        |       |       |       |       |       |       |        |        |       |       |       |       |        |
|------|-------|-----------|-----------|------|------|--------|--------|-------|-------|-------|-------|-------|-------|--------|--------|-------|-------|-------|-------|--------|
| 0.15 | 3.138 | 0.3220597 | 0.0288483 | 1.30 | 0.60 | 32.249 | 21.660 | 12.00 | 17.00 | 26.00 | 41.00 | 60.00 | 3.299 | 38.683 | 27.255 | 13.00 | 19.00 | 31.00 | 50.00 | 75.00  |
| 0.15 | 3.138 | 0.3220597 | 0.0288483 | 1.40 | 0.60 | 22.688 | 13.510 | 10.00 | 13.00 | 19.00 | 28.00 | 41.00 | 3.299 | 25.446 | 15.929 | 10.00 | 14.00 | 21.00 | 32.00 | 46.00  |
| 0.15 | 3.138 | 0.3220597 | 0.0288483 | 0.90 | 0.60 | 42.894 | 33.185 | 13.00 | 20.00 | 33.00 | 55.00 | 86.00 | 3.299 | 52.573 | 42.984 | 14.00 | 22.00 | 40.00 | 69.00 | 109.00 |
| 0.15 | 3.138 | 0.3220597 | 0.0288483 | 0.80 | 0.60 | 22.458 | 15.577 | 7.00  | 11.00 | 18.00 | 29.00 | 43.00 | 3.299 | 25.245 | 18.260 | 8.00  | 13.00 | 20.00 | 33.00 | 50.00  |
| 0.15 | 3.138 | 0.3220597 | 0.0288483 | 0.70 | 0.60 | 11.859 | 7.401  | 5.00  | 7.00  | 10.00 | 15.00 | 21.00 | 3.299 | 12.471 | 7.801  | 5.00  | 7.00  | 11.00 | 16.00 | 23.00  |
| 0.15 | 3.138 | 0.3220597 | 0.0288483 | 0.60 | 0.60 | 6.896  | 3.731  | 3.00  | 4.00  | 6.00  | 9.00  | 12.00 | 3.299 | 7.282  | 3.937  | 3.00  | 4.00  | 6.00  | 9.00  | 13.00  |
| 0.15 | 3.138 | 0.3220597 | 0.0288483 | 0.50 | 0.60 | 4.567  | 2.168  | 2.00  | 3.00  | 4.00  | 6.00  | 7.00  | 3.299 | 4.684  | 2.188  | 2.00  | 3.00  | 4.00  | 6.00  | 8.00   |
| 0.15 | 3.138 | 0.3220597 | 0.0288483 | 1.10 | 0.50 | 27.578 | 16.511 | 12.00 | 16.00 | 23.00 | 35.00 | 49.00 | 3.299 | 32.086 | 20.431 | 13.00 | 18.00 | 26.00 | 40.00 | 59.00  |
| 0.15 | 3.138 | 0.3220597 | 0.0288483 | 1.20 | 0.50 | 25.625 | 14.919 | 11.00 | 15.00 | 22.00 | 32.00 | 45.00 | 3.299 | 30.027 | 18.493 | 13.00 | 17.00 | 25.00 | 37.00 | 55.00  |
| 0.15 | 3.138 | 0.3220597 | 0.0288483 | 1.30 | 0.50 | 22.501 | 12.335 | 11.00 | 14.00 | 19.00 | 28.00 | 39.00 | 3.299 | 25.889 | 15.096 | 12.00 | 15.00 | 22.00 | 32.00 | 46.00  |
| 0.15 | 3.138 | 0.3220597 | 0.0288483 | 1.40 | 0.50 | 18.354 | 9.202  | 9.00  | 12.00 | 16.00 | 23.00 | 31.00 | 3.299 | 20.701 | 11.016 | 10.00 | 13.00 | 18.00 | 25.00 | 35.00  |
| 0.15 | 3.138 | 0.3220597 | 0.0288483 | 0.90 | 0.50 | 24.831 | 15.158 | 11.00 | 14.00 | 21.00 | 31.00 | 45.00 | 3.299 | 28.236 | 17.872 | 11.00 | 16.00 | 23.00 | 36.00 | 52.00  |
| 0.15 | 3.138 | 0.3220597 | 0.0288483 | 0.80 | 0.50 | 17.808 | 10.533 | 7.00  | 11.00 | 15.00 | 22.00 | 31.00 | 3.299 | 19.772 | 12.046 | 8.00  | 12.00 | 17.00 | 25.00 | 35.00  |
| 0.15 | 3.138 | 0.3220597 | 0.0288483 | 0.70 | 0.50 | 11.138 | 6.227  | 5.00  | 7.00  | 10.00 | 14.00 | 19.00 | 3.299 | 11.904 | 6.832  | 5.00  | 7.00  | 10.00 | 15.00 | 21.00  |
| 0.15 | 3.138 | 0.3220597 | 0.0288483 | 0.60 | 0.50 | 6.825  | 3.553  | 3.00  | 4.00  | 6.00  | 9.00  | 12.00 | 3.299 | 7.135  | 3.705  | 3.00  | 4.00  | 6.00  | 9.00  | 12.00  |
| 0.15 | 3.138 | 0.3220597 | 0.0288483 | 0.50 | 0.50 | 4.523  | 2.112  | 2.00  | 3.00  | 4.00  | 6.00  | 7.00  | 3.299 | 4.695  | 2.195  | 2.00  | 3.00  | 4.00  | 6.00  | 8.00   |
